# Supplementary material for: Co-expression network analysis identified hub genes critical to triglyceride and free fatty acid metabolism as key regulators of age-related vascular dysfunction in mice
Source: Aging (Albany NY). 2019 Sep 12;11(18):7620–38. doi: 10.18632/aging.102275 (PMC6781998; doi:10.18632/aging.102275)
Supplement: Supplementary Table 1 [file aging-11-102275-s022.xlsx]

## Sheet: Sheet1
Supplementary Table 1. Normalized Values for Agilent TXT Files of GSE50833 with Quantile Method
Probe ID	aorta-6m-rep1	aorta-6m-rep2	aorta-6m-rep3	aorta-6m-rep4	aorta-6m-rep5	aorta-6m-rep6	aorta-20m-rep1	aorta-20m-rep2	aorta-20m-rep3	aorta-20m-rep4	aorta-20m-rep5	aorta-20m-rep6
A_55_P2051983	3.8234	3.10684	3.63787	2.91296	3.70394	3.68069	2.48927	4.20867	2.49994	3.71772	4.31518	4.58686
A_52_P169082	4.89837	4.69988	4.63846	4.45877	4.64808	4.95567	4.59931	5.11852	4.51243	4.7588	5.30949	4.96339
A_30_P01028193	3.58124	3.55846	4.22162	3.16161	4.96916	1.95058	2.75274	4.87807	4.10069	4.02886	5.00517	4.4478
A_52_P237997	4.8154	4.80684	5.19436	4.84708	5.17785	5.62663	4.52815	5.00517	4.96339	5.00517	4.88622	5.13572
A_51_P414243	10.9142	10.9425	10.6775	10.6616	10.7908	10.8108	10.6863	10.9436	10.9326	10.8851	11.0593	10.9066
A_55_P2136348	3.14131	3.55846	3.87348	3.78903	3.8234	1.7864	2.96777	3.77153	3.44161	3.59375	4.2629	3.92584
A_30_P01033363	4.92037	5.12887	5.0888	4.3272	5.42032	4.83238	4.17246	4.59931	4.80469	4.7588	5.42173	5.15947
A_55_P2049737	3.65229	3.26528	4.37724	3.57873	4.64808	2.12599	3.57873	4.20867	2.24488	3.46357	4.34506	4.47778
A_30_P01024440	7.89096	8.00931	7.55035	7.49877	7.65635	7.70484	7.61418	7.71217	7.46054	7.67368	7.57971	7.89084
A_30_P01025554	11.5523	11.4348	11.5293	11.384	11.2314	11.7243	11.5931	11.3675	11.596	11.1927	11.3332	11.1316
A_30_P01031558	4.55397	4.07596	4.69988	4.94595	5.04578	4.28002	4.21516	4.87807	4.01033	4.16577	5.0888	4.29081
A_30_P01030675	3.70394	2.69821	3.75826	2.70744	4.26915	2.66067	1.83762	4.31215	3.14131	3.46357	4.06522	3.75826
A_51_P328014	9.99469	9.99699	10.1698	9.72037	9.69325	10.3742	10.1952	10.0016	10.0417	9.78496	9.76855	9.7173
A_30_P01019108	5.66623	5.98276	6.38209	5.4982	6.2406	5.60085	6.04144	6.2406	6.04326	6.03595	5.45088	6.12391
A_55_P2056220	9.32425	9.40818	9.12113	9.04482	9.2324	9.29546	9.22297	9.59357	9.35826	9.25432	9.62987	9.3433
A_55_P1985764	13.2938	13.3938	13.8391	13.2388	13.1942	13.9483	13.5408	13.48	13.665	13.4133	13.5226	13.141
A_52_P108321	6.76031	7.01577	6.62373	6.58293	6.57476	6.95359	6.78995	7.1058	6.90727	6.70549	7.05653	6.80454
A_55_P2018002	8.86499	8.87687	8.43858	8.4762	8.62034	8.57377	8.61283	9.01137	8.98326	8.74059	9.05022	8.68938
A_52_P123354	9.38835	9.53404	9.79616	9.51227	9.3757	9.76347	9.8384	9.46669	9.45676	9.26001	9.04687	9.29503
A_30_P01023685	3.92584	3.98398	4.69988	3.16161	5.04578	3.36199	3.50652	4.11811	3.80632	3.46357	4.6239	5.04578
A_55_P2061724	6.06946	6.16638	6.17139	6.10395	6.32325	6.35517	6.00446	5.90062	6.321	6.17223	6.23742	6.14445
A_55_P2049122	7.16313	7.40257	7.40364	7.33716	7.43871	7.56915	7.71903	7.60355	7.49877	7.21786	6.48835	7.28954
ERCC-00014_76	4.12845	3.41368	4.45055	3.78903	4.05441	3.56356	3.14131	4.20867	3.74935	3.83187	4.88622	4.52293
A_30_P01020389	4.12845	3.55846	4.45055	3.95326	4.7068	3.92979	3.87758	4.94984	4.01033	4.20541	3.99155	4.11811
A_55_P1988844	4.67891	3.67129	4.80684	3.68537	4.7068	4.11811	4.02886	4.9939	3.62818	5.00517	4.57682	4.55397
A_51_P385099	4.58686	4.20541	4.83449	4.20215	4.19232	3.78903	4.38876	4.52293	3.90993	4.20541	4.31518	3.6427
A_55_P2111005	10.6458	10.7601	10.2882	10.3612	10.536	10.4033	10.4878	10.6855	10.6653	10.482	10.777	10.5587
A_30_P01029364	4.52554	4.69988	4.6092	3.78903	4.99578	3.83187	4.07952	4.63362	4.04716	4.12156	4.77645	4.93813
A_55_P2041509	10.8676	10.7724	10.5813	10.4278	10.5632	10.7577	10.6002	10.6757	10.7209	10.5071	10.744	10.6047
A_55_P1985294	3.98398	4.07596	3.75826	3.5118	4.76102	4.28002	4.3	4.13873	3.90993	3.92979	3.56356	3.57873
A_55_P2242690	5.29884	5.47946	5.62054	4.74092	5.70823	4.56671	4.78302	5.26485	5.24438	5.49953	5.34394	5.6792
A_30_P01029765	6.1196	6.41698	6.69972	6.65896	6.4	6.42959	6.3792	6.88761	6.58293	6.66074	6.86767	6.85422
A_55_P2364211	4.89837	4.80684	5.17119	3.78903	4.76102	4.83238	4.81327	4.87807	4.47238	4.47238	4.57682	4.74541
A_55_P1975977	2.33698	3.55846	4.05441	0.925984	4.13531	2.66067	2.85598	2.99819	3.36199	3.32048	3.56356	4.02517
ERCC-00165_60	4.45877	2.91296	3.63787	3.72683	4.10768	3.72228	2.63187	3.26528	3.03532	3.46357	3.83187	3.57873
A_51_P358243	9.97117	9.90073	9.75939	9.7188	9.48371	9.96571	9.96415	9.91633	9.77696	9.49187	9.52953	9.58252
A_55_P2252586	4.84289	5.08704	5.25701	4.52031	5.23643	4.63241	4.78302	5.24596	4.90038	5.1561	5.12887	5.04578
A_30_P01020720	11.9019	11.6558	11.5573	11.6003	11.5414	11.8763	11.6722	11.6285	11.8164	11.5404	11.5703	11.4402
A_55_P2153545	4.42279	3.88166	4.63846	3.95326	4.30305	2.75274	3.44713	5.21231	3.90993	3.26528	5.65076	4.52293
A_30_P01025927	3.58124	3.41368	3.75826	2.63187	4.33913	3.68069	3.2962	4.3421	4.01033	3.59375	4.12845	3.81489
ERCC-00136_67	4.02886	1.7864	3.81489	3.45811	3.58375	3.14131	1.83762	3.85283	3.90993	3.92979	4.12845	3.92584
A_55_P1999972	5.13914	5.553	5.978	5.3848	5.25701	5.52716	5.31403	5.88698	5.68739	5.36378	5.83895	5.50218
A_55_P2036031	3.70394	0.625731	4.37724	3.00569	3.961	2.66067	2.63187	4.28466	3.14131	3.83187	3.92188	4.11811
A_55_P2073699	10.1161	10.4056	10.1776	10.1309	10.1854	10.2952	10.2867	10.2909	10.195	10.0552	9.82835	10.02
A_51_P452153	6.13079	4.75658	5.7909	4.76544	4.81327	4.35977	5.19107	6.31572	5.46592	5.1561	5.69204	5.24596
A_52_P289213	10.835	10.9267	10.4265	10.3699	10.5553	10.5339	10.4137	10.777	10.8399	10.5349	10.8193	10.7512
A_30_P01028667	5.88647	6.10395	6.395	6.15799	6.6916	6.2406	6.19702	6.30588	6.13935	6.81579	5.90264	6.38281
A_30_P01026843	8.14057	8.18338	8.23317	8.71471	8.69918	8.08343	8.05613	8.08597	7.88564	8.69983	8.07899	8.28092
A_52_P117601	4.02886	2.18004	4.40871	3.45811	4.10768	2.66067	3.21438	3.72683	3.69469	3.83187	4.34506	4.37434
A_30_P01026156	2.47853	3.10684	3.75826	2.47853	4.58936	2.86426	3.2962	4.4615	2.65113	3.92979	4.6239	4.4478
A_55_P2087013	5.87422	6.07482	6.45995	5.8421	6.3419	6.17139	6.11873	6.31572	5.87114	6.0899	6.30436	6.21088
A_30_P01021140	3.8234	3.26528	4.57934	3.32048	5.05665	3.83187	3.14131	4.63362	3.80632	3.87758	4.66476	4.93813
A_55_P2086143	8.80046	8.88719	8.71914	8.60537	8.59724	8.52964	8.7351	8.9355	8.82334	8.60583	9.17011	8.71536
A_30_P01022210	3.44713	2.69821	4.75658	4.26915	4.33913	3.36199	3.8234	4.57934	3.90993	3.83187	5.21231	4.7091
A_55_P2033932	8.91635	8.78453	8.40953	8.11759	8.52393	8.80759	8.34147	8.66722	8.80679	8.60127	8.77469	8.48604
A_51_P111488	8.12859	8.1988	8.22636	7.81144	8.04206	8.30373	8.19635	8.05331	8.1395	7.81639	8.10978	8.12902
A_55_P2433218	10.2151	9.97831	9.97595	9.94841	9.89786	10.2097	10.0681	10.015	10.0934	9.91686	9.97601	9.78622
A_30_P01030870	4.94984	3.46357	4.34506	4.16242	4.47238	3.92979	4.21516	4.73416	3.80632	4.64087	5.50284	4.4478
A_55_P2157676	14.9581	14.9724	14.9379	14.9304	15.2038	15.2779	15.0199	15.3139	15.1225	15.2263	15.0223	15.2476
A_55_P2069781	4.64568	3.88166	5.04759	3.78903	4.99578	4.02886	3.87758	5.24596	4.01033	3.98398	4.69293	5.11332
A_30_P01019449	3.77153	4.07596	4.57934	3.45811	4.47238	4.02886	3.44713	4.3421	4.53853	3.92979	4.39734	5.26797
A_55_P2137336	6.66549	6.57916	6.3419	6.20926	6.19045	6.64911	6.10919	6.41698	6.48701	6.0469	6.2883	6.2222
A_55_P2279572	4.67891	4.83449	5.1323	4.84708	4.95179	4.91041	4.81327	5.31554	4.9939	5.39911	4.52554	4.99578
A_30_P01023723	2.95232	3.88166	4.37724	2.37803	4.01405	3.56356	3.2962	4.4615	3.57873	3.92979	4.31518	4.47778
A_30_P01033167	4.12845	1.31303	4.69988	2.82238	4.19232	3.20788	3.69932	4.3421	2.24488	3.16161	4.93026	4.37434
A_51_P168695	9.23085	9.65946	8.77469	9.25166	9.48711	9.07071	9.10435	9.60511	9.14421	9.61596	9.23649	9.53396
A_30_P01027779	3.2962	2.4458	4.05441	3.57873	3.92188	4.11811	3.7627	3.63787	2.75274	3.71772	4.2629	4.20541
A_55_P2167530	12.658	12.8417	12.1865	12.3087	12.3867	12.1503	11.8257	12.3774	12.4745	12.4376	12.627	12.3646
A_30_P01024579	3.77153	2.91296	4.51769	3.32048	4.05441	3.83187	4.21516	4.4615	3.80632	4.12156	4.28774	4.6239
A_52_P204689	7.10318	7.30217	7.4086	6.91675	6.93406	7.27331	7.06755	7.04747	7.14922	7.04883	7.39705	7.07537
A_55_P2218748	4.89837	3.88166	5.0888	4.26915	4.78738	3.83187	4.83975	5.07817	4.33616	5.21555	4.31518	4.99578
A_55_P2143616	4.48585	4.24716	4.95567	4.54112	5.51538	5.0033	4.3	5.13572	4.69757	5.32607	5.42173	5.30797
ERCC-00158_78	3.58124	2.91296	4.69988	3.87758	4.10768	2.12599	3.69932	3.77153	3.50652	3.41368	6.79861	4.02517
A_30_P01031589	3.2962	2.69821	3.75826	1.83762	4.26915	3.06436	3.14131	3.44161	3.03532	3.92979	4.69293	4.11811
A_30_P01033198	4.02886	2.57247	4.30305	4.04716	4.67891	4.11811	3.92584	4.6836	3.84866	3.92979	4.20215	4.37434
A_52_P49014	3.14131	2.69821	3.03532	2.82238	3.92188	2.12599	3.2962	3.69469	2.49994	2.27002	3.16161	3.21438
A_55_P2110215	10.6792	10.5634	10.4137	10.3796	10.522	10.2693	10.0087	10.3507	10.4135	10.4017	10.5085	10.3604
A_55_P2007205	5.95493	5.49687	7.4086	5.1323	5.81566	5.4329	5.19107	5.83474	5.57838	5.5934	6.15841	5.71282
A_51_P204740	13.4822	13.3109	13.3413	12.87	13.2494	13.2522	13.0071	13.1002	13.3793	13.1327	13.2232	13.1755
A_55_P1991585	10.4055	10.5702	10.5554	10.4601	10.124	10.61	10.5643	10.4096	10.6128	10.332	10.1473	10.3021
A_55_P2158836	1.30151	3.10684	3.92584	1.37096	4.01405	2.66067	2.75274	3.77153	3.57873	3.98398	4.52554	4.7091
A_55_P2086797	3.58124	3.10684	4.45055	3.57873	4.10768	2.55212	3.92584	4.37724	2.24488	3.32048	5.16115	4.65287
A_55_P2170350	3.51706	4.02886	4.37724	4.04716	4.13531	2.96777	3.8234	5.51012	4.10069	4.12156	5.03206	3.44713
A_30_P01021693	3.92584	3.88166	4.45055	3.92584	3.8234	3.72228	3.14131	4.52293	3.50652	3.46357	5.56066	4.25033
ERCC-00042_60	3.44713	2.57247	4.05441	3.39094	4.33913	3.92979	3.2962	4.18903	3.90993	2.81386	4.96916	4.7091
A_51_P106952	8.43598	8.62293	8.53896	8.58336	8.85652	8.76912	8.41217	8.68741	8.63583	8.85068	8.79979	8.91734
A_30_P01024335	3.44713	2.57247	4.40871	4.3	4.33913	3.47443	3.8234	4.40019	3.74935	2.81386	5.27885	4.3272
A_55_P2335045	3.2962	3.10684	4.30305	3.95326	4.33913	3.36199	2.96777	4.65525	3.36199	2.81386	4.91041	4.65287
A_30_P01029862	3.58124	2.91296	4.80684	4.12845	4.47238	3.2962	3.69932	4.73416	4.51243	3.83187	4.22162	4.58686
A_30_P01027625	3.20788	1.7864	2.19325	2.63187	3.2962	1.95058	2.48927	3.44161	2.75274	2.99819	3.32048	2.55212
ERCC-00002_129	3.70394	3.77592	4.48317	4.22483	4.81327	3.47443	3.44713	4.3421	3.69469	4.12156	4.06522	4.65287
A_52_P604735	3.58124	4.38876	4.22162	3.68537	4.64808	4.24399	4.38876	4.90038	4.10069	4.4478	4.6239	3.92584
A_30_P01020302	3.92584	4.58686	4.48317	4.01405	4.83449	3.83187	4.17246	4.25033	4.01033	3.98398	4.2629	4.99578
A_55_P2083725	4.96724	5.04578	5.29731	5.08438	5.45225	4.83238	4.51243	5.17785	4.87602	5.00517	6.32024	5.22522
A_30_P01023984	10.6308	10.6399	10.4472	10.613	10.8427	10.522	10.1337	10.5105	10.5021	10.7257	10.3952	10.8962
A_55_P2184108	3.44713	3.71772	3.87348	3.63304	3.8234	2.86426	3.2962	3.38519	3.44161	3.92979	3.92188	3.14131
A_55_P1958097	14.6782	14.8856	15.5133	15.1342	14.425	15.6795	15.5414	14.7071	15.2779	14.9429	14.2086	14.3842
A_55_P1962224	7.74505	7.46378	7.17815	6.75197	7.27487	7.72274	7.121	7.58708	7.70326	7.56851	7.35893	7.4573
A_30_P01018954	3.44713	3.10684	4.37724	2.82238	4.53075	3.47443	3.36783	3.72683	4.33616	2.99819	4.31518	3.92584
A_55_P1952434	10.0042	10.1014	10.1357	10.2123	10.2409	10.3101	10.135	10.1331	10.0758	10.2112	10.0712	10.132
A_55_P1955242	15.6008	15.5235	15.3048	15.5484	15.5378	15.4755	15.3327	15.4755	15.5414	15.4601	15.1574	15.4755
A_55_P1985950	7.59782	7.54698	7.50457	7.1769	7.36295	7.98151	7.26474	7.76536	7.69487	7.91657	7.85455	7.96693
A_55_P2011091	5.61073	6.06498	6.00071	6.4	6.11353	5.90464	6.0286	5.86187	5.4048	6.33893	5.00517	6.19127
A_55_P2186085	8.22827	8.34868	8.2894	8.22697	8.36964	8.51935	8.11975	7.99453	8.56855	8.43493	8.2165	8.20951
A_30_P01032907	3.8234	2.57247	4.10768	4.04716	4.33913	2.86426	3.8234	4.07952	3.80632	4.12156	4.80469	4.58686
A_30_P01029867	3.8234	2.69821	3.92584	3.92584	4.05441	2.66067	3.14131	4.4615	3.57873	4.29081	4.80469	4.76544
A_55_P2046852	4.12845	3.98398	4.45055	2.82238	4.76102	4.20215	4.02886	4.43117	3.84866	3.87758	4.93026	4.58686
A_55_P1965358	6.67346	6.55954	6.6916	6.84222	7.05743	6.72835	6.62556	6.503	6.34264	6.48029	6.83065	7.00036
A_55_P2108825	2.95232	3.26528	3.75826	3.72683	4.26915	3.14131	3.50652	4.4615	4.13531	3.77153	5.22683	4.29081
A_52_P95577	3.70394	3.32048	4.05441	2.63187	4.40588	3.56356	3.98398	3.92979	3.62818	3.77153	4.31518	3.69932
A_30_P01021023	3.36783	2.99819	4.22162	3.16161	4.4478	3.36199	3.14131	3.47443	3.14131	3.16161	4.06522	3.81489
A_66_P114577	3.98398	3.10684	3.75826	3.39094	4.64808	3.78903	3.2962	4.07952	3.14131	2.58254	4.7091	3.75826
A_55_P2176989	3.14131	0.231227	4.22162	-0.893351	4.76102	3.36199	2.75274	4.40019	2.75274	2.81386	3.83187	3.21438
A_30_P01025937	3.77153	4.55653	4.13873	3.95326	4.64808	3.68069	3.44713	4.85541	4.2629	4.29081	4.2629	4.52293
A_55_P1955078	7.44975	7.87684	8.18957	6.93185	7.42862	8.22295	7.42583	7.6797	7.97005	8.01327	8.02439	7.49577
ERCC-00018_67	4.12845	2.91296	4.51769	3.78903	4.10768	3.83187	3.69932	4.11811	4.10069	3.32048	5.22683	3.98017
A_52_P438082	8.31095	8.48453	8.91964	8.62369	8.70948	8.65415	8.67276	8.2172	8.44307	8.48193	7.77664	8.50759
A_66_P114169	4.38013	4.24716	5.0888	4.65764	4.64808	4.49388	4.38876	4.85541	4.51243	4.29081	5.00517	5.0888
A_55_P1957613	13.3312	13.0922	13.5142	13.3009	13.2245	14.0959	13.4323	13.2651	13.6081	13.5041	13.0967	13.3251
A_55_P2109347	5.42732	5.61196	5.65911	5.3848	5.80387	5.4329	5.37179	5.73669	5.52586	5.51801	5.32607	5.74232
A_30_P01018787	4.12845	3.67129	4.5437	3.57873	4.26915	3.78903	3.87758	4.54884	3.14131	3.32048	5.34394	4.82604
A_30_P01030780	4.45877	3.88166	4.6092	4.74092	5.05665	4.20215	4.4615	5.09409	4.47238	4.02886	6.47354	5.26797
A_30_P01018803	4.38013	4.24716	4.77645	3.78903	4.90239	3.72228	3.36783	4.73416	4.53853	3.92979	4.93026	5.04578
A_30_P01018668	4.30305	4.58686	4.80684	3.78903	5.20255	3.47443	4.86781	4.40019	4.47238	4.29081	4.42838	4.76544
A_55_P2111292	7.92747	7.82357	7.4086	8.02727	7.89387	7.54134	7.4015	7.46701	7.61279	7.74701	7.30559	7.57247
A_55_P2084601	2.85182	3.46357	3.69932	3.16161	4.40588	3.59872	3.87758	4.04351	3.80632	3.16161	3.99155	4.16242
A_55_P1956687	6.4507	6.04736	6.5589	6.35223	6.40993	6.56907	6.87639	6.2222	6.43446	6.24219	6.13977	6.59324
A_51_P104681	4.12845	3.26528	4.37724	3.32048	4.01405	2.55212	3.44713	4.20867	3.20788	3.16161	3.99155	3.81489
A_55_P2124736	11.8692	11.9707	11.7137	11.615	11.7073	11.819	11.4952	11.5342	11.7595	11.936	11.5966	11.9211
A_52_P180335	9.89423	10.0304	10.3155	10.4615	9.92949	10.2262	10.3453	10.0461	9.98571	10.1503	9.39917	10.0393
A_55_P2051429	7.64529	7.70383	8.0852	7.93952	7.80595	7.88131	7.89071	7.7253	7.86283	8.0065	7.3177	7.84464
A_51_P101765	5.88647	6.41698	5.95299	5.81779	5.80387	5.81726	5.89255	6.18963	5.92951	6.20641	6.36104	6.41768
A_52_P222230	8.76884	9.46154	9.50856	9.53493	9.39739	8.98308	9.26246	9.25323	9.11729	9.67108	9.09174	9.08777
A_51_P483576	9.53954	7.43524	9.15384	7.98602	6.93406	6.75364	6.8687	8.67268	6.94581	8.61375	7.10798	7.41566
A_55_P2372228	5.01078	4.80684	5.76681	5.23961	5.51538	4.72055	5.09761	5.70938	5.6745	5.43568	6.45995	5.41046
A_51_P436201	7.94587	8.13502	8.14991	8.33683	7.91967	8.09908	8.28978	8.25084	8.07921	8.24392	8.35659	8.32292
A_51_P108228	3.44713	1.95058	3.97827	3.63304	4.19232	2.66067	1.83762	4.07952	3.62818	3.83187	5.39126	3.98017
A_66_P122433	3.92584	3.67129	4.75658	3.82764	4.7068	3.20788	3.44713	3.85283	2.49994	3.54308	4.52554	4.06881
A_55_P2055055	3.44713	3.41368	4.63846	3.00569	4.73867	4.38876	3.57873	4.07952	3.69469	4.20541	4.57682	4.6239
A_30_P01023752	4.21516	3.67129	4.6092	4.20215	4.53075	3.68069	3.8234	4.13873	3.20788	4.16577	4.7091	4.02517
A_51_P104897	9.27503	9.20343	9.44491	9.21753	9.22749	9.46206	9.27134	9.40539	9.63653	9.58635	9.01661	9.65342
A_55_P2040490	8.63462	8.79262	8.82996	9.30566	9.16865	8.00662	9.08123	9.28393	8.58038	9.22829	8.55183	9.41264
A_55_P2253348	10.6763	10.6306	10.7861	11.0179	11.2024	10.4413	10.8912	10.7408	10.7362	10.809	9.77415	11.1267
A_55_P2007377	9.30566	9.65066	9.40032	9.45385	9.63623	9.2874	9.08123	9.35464	9.25151	9.45779	9.02857	9.50422
A_55_P2110250	3.92584	3.67129	4.83449	3.57873	4.37724	3.68069	4.21516	4.57934	4.10069	4.20541	4.42838	4.29081
A_51_P330428	13.0713	12.8898	13.3135	13.0384	12.9861	13.4731	13.2065	12.8015	13.0535	13.0576	12.4095	12.8139
A_55_P2419171	2.47853	3.67129	4.45055	4.04716	4.4478	3.2962	2.96777	4.78302	2.24488	3.46357	4.88622	4.29081
A_55_P2124923	3.2962	1.31303	4.37724	3.16161	4.01405	3.44161	3.50652	4.18903	3.84866	3.59375	4.42838	4.37434
A_66_P109673	9.02361	9.12947	9.21652	9.06556	9.14702	9.31021	8.90147	9.12458	9.30166	9.39765	9.33374	9.38467
A_55_P2008896	10.4872	10.6058	10.4689	10.7387	10.6935	10.3914	10.2655	10.41	10.5772	10.6762	8.70847	10.5437
A_30_P01030312	3.92584	3.10684	4.45055	3.78903	3.8234	3.20788	3.8234	4.28466	3.2962	3.54308	5.47676	4.58686
A_55_P2232410	3.70394	2.18004	3.81489	2.91296	4.10768	3.72228	3.44713	4.07952	3.69469	3.32048	4.20215	4.20541
A_30_P01027288	4.30305	4.20541	4.45055	4.01405	4.76102	4.35977	4.9479	4.20867	4.18903	4.8387	4.64568	5.04578
A_51_P397876	5.42732	5.23483	5.43568	5.3848	6.07482	5.36013	5.7974	5.65494	5.25701	5.70938	5.35866	5.90464
A_30_P01022060	5.13914	4.3212	5.17119	4.45877	5.36597	5.13401	4.7251	5.51012	5.43568	5.00517	5.98466	4.85541
A_55_P2117579	5.39769	5.28965	5.55939	5.15441	5.64717	5.36013	5.49953	5.60085	5.57838	5.25544	5.03206	5.50218
A_51_P156800	11.214	11.4138	10.6729	11.0617	11.2649	10.852	10.9966	11.4752	11.2002	11.4926	11.1034	11.4678
DarkCorner	3.44713	2.80528	4.30305	2.82238	4.10768	0.897474	3.44713	3.90592	3.80632	3.59375	4.34506	3.92584
GE_BrightCorner	12.7792	12.8855	12.5202	12.8878	12.7237	12.711	12.8597	12.8342	13.1042	12.8968	12.0794	12.7491
A_30_P01023440	4.18242	4.07596	3.36783	3.45811	4.26915	3.47443	3.44713	4.63362	4.2629	3.59375	4.59683	4.29081
A_55_P2117741	10.2435	9.82368	9.67711	9.6976	9.81773	10.0079	9.49425	9.8383	10.2181	9.73395	10.2427	9.78833
A_66_P135885	3.98398	3.88166	4.13873	4.04716	4.33913	3.88573	3.21438	4.80469	4.47238	4.07596	4.6239	4.4478
A_30_P01030160	4.7091	3.98398	4.77645	4.12845	4.90239	3.59872	3.44713	4.20867	4.18903	3.71772	4.93026	5.04578
A_30_P01021134	3.8234	2.99819	3.2962	2.37803	4.33913	3.14131	2.75274	4.3421	2.85598	2.99819	3.7977	4.37434
A_55_P2145706	8.38258	8.22335	8.0852	8.20493	8.1984	8.6022	8.19173	8.30554	8.54283	8.13437	8.27588	7.89804
A_55_P2049949	7.38972	7.60726	7.56788	7.72842	7.55802	7.2399	7.44872	7.47362	7.61602	7.6876	7.28839	7.51988
A_51_P327657	3.70394	4.3212	4.57934	3.32048	4.64808	3.36199	3.14131	4.20867	4.01033	3.67129	4.57682	3.92584
A_55_P2354675	3.58124	3.32048	3.20788	3.39094	4.10768	2.86426	3.2962	3.72683	3.2962	3.92979	3.56356	3.92584
A_55_P2045765	5.92457	5.92951	5.84941	5.10287	5.3848	6.3419	5.67685	6.03045	6.38569	6.02399	5.7042	6.03045
A_55_P2170881	5.52716	5.39911	5.65911	4.86781	4.95179	5.58341	5.23164	5.03298	5.35866	5.04941	5.71282	5.22522
A_30_P01021553	3.14131	2.69821	3.97827	2.91296	4.01405	-0.893351	2.63187	3.47443	3.44161	3.26528	4.10768	4.29081
A_55_P1969560	3.70394	2.4458	3.97827	3.87758	4.7068	2.86426	-0.7005	3.14131	3.2962	3.32048	4.06522	3.44713
A_55_P2035789	4.02886	2.18004	3.87348	3.57873	4.73867	0.278361	2.19325	5.88698	3.44161	2.69821	5.04759	4.02517
A_30_P01022993	4.38013	4.69988	5.01822	3.78903	5.12543	4.28002	4.12845	5.03298	4.53853	4.70219	4.47238	4.99578
A_30_P01021899	5.09761	5.12887	4.95567	4.76544	5.30949	3.56356	4.2629	4.78302	4.10069	4.7588	5.21231	4.96339
A_51_P195506	9.86861	10.1165	10.0292	9.63336	9.91225	9.89196	9.76022	9.95276	10.0016	9.86336	10.0956	9.91729
A_52_P259817	3.87758	2.69821	3.63787	3.78903	3.92188	3.72228	2.19325	4.65525	3.50652	3.98398	4.34506	4.11811
A_30_P01017751	5.4982	6.00446	6.02768	5.34394	5.71854	5.82841	5.78655	6.06048	5.68739	6.02399	5.76571	5.95493
A_30_P01018616	7.39955	7.288	7.39812	7.1769	7.34384	7.11016	7.0511	7.39866	7.21786	7.29721	7.57704	7.28954
A_55_P2172375	6.31346	6.26543	6.38209	6.41909	6.54417	6.62007	6.48029	6.66579	6.64791	6.5589	6.42924	6.75197
A_30_P01022097	2.47853	3.55846	4.13873	4.12845	4.10768	2.86426	3.2962	4.4615	3.84866	3.46357	4.93026	4.06881
A_55_P2002165	6.20763	6.27671	6.19661	5.73557	6.1487	6.05144	5.96555	6.30588	6.56082	5.90364	6.19045	6.12391
A_30_P01029814	3.92584	4.35977	5.19436	3.68537	5.20255	4.28002	4.02886	4.20867	4.96339	4.60427	5.0888	4.7091
A_55_P2138071	11.5732	11.7734	11.5954	11.7049	11.6068	11.5575	11.5748	11.8519	11.6499	11.5983	11.5939	11.6907
A_51_P126337	5.0888	3.59375	4.85541	4.09014	4.99578	4.11811	5.58215	6.05054	4.59931	4.02886	4.75658	4.4478
A_55_P2165120	4.61902	5.17785	4.80684	4.57682	5.3848	4.83238	3.8234	4.78302	4.40588	4.96147	5.19272	5.06206
A_55_P2006255	10.6413	11.0281	10.9086	10.2386	10.1436	10.4762	10.3814	11.2344	10.6893	10.3742	10.4514	10.8096
ERCC-00009_60	4.12845	3.55846	3.50652	3.95326	4.26915	2.96777	2.96777	4.65525	3.44161	4.12156	4.52554	4.58686
A_55_P2087607	5.9894	6.08548	5.978	5.05304	6.1487	6.2222	5.94326	6.30588	6.20274	6.13251	6.15124	6.00446
A_30_P01026850	3.44713	3.26528	4.34506	3.63304	4.30305	3.72228	2.75274	3.63787	3.90993	4.12156	4.16577	3.21438
ERCC-00051_60	3.14131	3.55846	3.36783	-0.170805	3.92188	1.7864	3.14131	3.32048	0.81172	4.16577	3.83187	3.92584
A_30_P01020040	4.42279	3.88166	5.04759	3.72683	5.23643	4.63241	4.02886	4.78302	4.40588	4.4478	4.7091	4.52293
A_52_P142208	9.57268	9.61408	9.79203	9.54736	9.63623	9.68144	9.84932	9.88482	9.69905	9.65417	9.8804	9.83439
A_51_P124254	12.1823	12.3019	11.9238	11.9798	12.1355	11.9401	11.9546	12.4151	12.1232	12.1442	12.3358	12.1651
A_55_P1975445	11.8514	12.0324	11.7853	11.9325	11.7268	11.5547	11.7095	11.8776	11.6889	11.6254	11.6294	11.676
A_30_P01033257	3.92584	2.69821	4.13873	3.68537	4.53075	3.56356	3.57873	4.43117	4.01033	4.16577	4.7091	4.55397
A_55_P1971448	11.2397	10.9535	10.8677	11.0646	11.0788	11.0849	10.9454	11.1435	11.1615	10.8916	11.1703	11.1435
A_51_P130095	7.51167	7.11016	7.53698	6.52275	7.28029	7.34753	7.59394	7.41072	7.81358	7.35856	7.4631	7.41988
A_55_P2022622	4.45877	4.38876	4.98063	4.52031	4.99578	3.98398	3.92584	5.33354	4.10069	4.70219	5.24596	5.30797
A_55_P2123012	4.30305	3.77592	4.75658	3.95326	4.7068	4.28002	4.02886	4.9939	4.87602	4.64087	4.52554	4.88419
A_52_P501049	7.3143	7.37241	7.2569	6.99636	7.08271	7.27797	7.27584	7.37096	7.22632	7.1184	7.40044	7.13175
(+)E1A_r60_a22	10.2303	10.4555	11.0145	10.7703	10.6716	9.81653	10.842	10.132	9.77453	10.3937	9.75097	10.6013
A_55_P2183672	16.6302	16.8729	16.7886	16.8427	16.7596	16.9745	16.9079	16.7238	16.8022	16.9079	16.3729	16.8191
A_66_P129769	7.72842	7.477	8.67268	7.74112	7.93682	7.90608	8.00919	7.85038	7.91657	7.36259	7.87799	7.81559
A_55_P2100830	5.88647	5.95493	6.22702	6.0766	6.96037	5.86187	5.86703	6.13336	6.19292	6.11353	6.27826	6.03045
A_30_P01030309	4.02886	0.625731	3.50652	2.37803	5.2742	2.43473	3.14131	4.28466	3.50652	3.46357	4.06522	4.11811
A_30_P01018792	4.61902	3.41368	4.30305	4.74092	4.26915	3.92979	4.38876	5.33354	3.90993	4.57682	4.37724	4.96339
A_52_P588771	4.42279	2.57247	3.57873	3.72683	4.26915	3.92979	3.14131	3.77153	3.20788	4.02886	3.65706	3.92584
A_30_P01030301	4.38013	3.26528	4.63846	4.79606	4.96916	4.72055	3.21438	4.87807	4.87602	4.70219	5.04759	4.74541
A_55_P2008996	5.39769	5.66623	5.65911	5.03665	6.05235	5.04941	5.46592	5.6792	5.63512	6.0469	5.29425	6.00446
A_52_P6451	8.14057	8.05703	7.95086	7.70657	8.24471	8.39959	7.71188	7.82662	8.06019	7.87389	8.10978	7.94148
A_30_P01024162	3.2962	3.10684	5.17119	2.37803	4.26915	2.12599	2.75274	4.37724	3.14131	3.26528	4.2629	3.44713
A_55_P2154480	3.70394	3.77592	4.57934	4.20215	4.10768	3.83187	3.69932	4.65525	4.10069	4.3272	4.80469	4.4478
A_55_P2140328	11.5078	11.3496	11.6121	11.3379	11.2896	11.5671	11.4967	11.2828	11.3381	11.1116	11.2706	11.2383
A_55_P2110532	2.95232	3.71772	3.63787	3.5118	4.90239	3.44161	1.37096	4.07952	3.2962	3.32048	4.31518	5.0888
A_30_P01026277	5.87422	6.18468	6.02768	5.81779	6.48096	5.80602	6.21897	6.10133	5.98086	6.13251	5.53237	6.2975
A_52_P306236	3.14131	3.26528	4.34506	3.68537	4.33913	3.06436	3.21438	3.47443	3.80632	3.46357	4.52554	4.02517
A_30_P01029410	3.70394	1.31303	4.19561	3.63304	4.01405	3.47443	3.57873	4.4615	2.96007	4.29081	4.7091	4.58686
A_55_P2383283	4.45877	3.41368	4.19561	4.16242	4.26915	3.92979	4.02886	3.69469	4.01033	3.59375	4.57682	3.92584
A_55_P2188624	3.51706	2.91296	3.44161	3.00569	4.01405	2.55212	2.48927	4.3421	3.50652	3.46357	4.06522	3.81489
A_55_P2087518	6.65628	6.92519	6.85526	7.35563	7.54489	6.96037	6.35847	6.86458	6.98715	7.02179	6.97597	7.28954
A_55_P1970954	8.70545	8.66574	8.11608	8.33962	8.42936	8.24332	8.28978	8.62917	8.47265	8.44489	8.58375	8.62689
A_52_P329398	4.30305	4.83449	5.0033	3.95326	5.04578	4.58936	4.3	4.96532	3.80632	4.51507	5.00517	5.11332
A_55_P2328787	8.94669	9.17885	9.38988	9.37796	9.48027	8.90824	9.30233	9.46197	9.24731	9.41968	9.29909	9.27523
A_66_P120567	11.351	11.5218	10.9623	11.2339	11.4099	11.2249	11.2265	11.5042	11.6239	11.6365	11.3482	11.5751
A_55_P2038640	9.03098	9.20831	9.25864	9.05763	8.91747	8.9613	9.06898	9.56659	9.1284	9.16383	9.39917	9.29785
A_55_P2091831	4.58686	4.91041	5.19436	4.79606	5.25701	5.21555	4.59931	4.54884	4.82604	4.60427	4.7091	4.58686
A_51_P100298	5.24438	5.16283	5.17119	5.42453	5.34837	5.4329	4.9479	5.58215	5.24438	5.48886	6.23742	5.61564
A_55_P2255399	7.00645	6.8537	7.15725	6.98857	7.43524	6.97095	6.72039	7.44562	6.97788	7.08293	7.59736	7.59813
A_55_P2173952	13.0301	8.15023	7.78143	10.6256	11.0503	10.7513	14.0761	9.27707	7.52495	7.30179	9.16912	10.6961
A_30_P01021519	5.222	5.04578	5.67332	4.94595	5.34837	5.0033	5.35279	5.35132	5.17119	5.70938	4.69293	5.35132
A_51_P113906	3.2962	3.41368	4.30305	2.08408	4.10768	2.12599	3.2962	3.92979	3.50652	3.71772	4.22162	6.38281
A_55_P2032024	6.41311	6.43793	6.25955	6.46131	6.26034	6.20193	5.97896	6.51849	6.55699	6.66756	6.08637	6.44139
A_51_P401386	4.02886	2.69821	4.69988	1.83762	4.05441	3.83187	2.96777	4.31215	2.85598	3.32048	4.31518	4.37434
A_51_P116088	11.4203	11.3561	11.1158	11.3349	11.5694	11.3768	11.3032	11.3847	11.5302	11.5131	11.0483	11.5468
A_30_P01028923	4.7091	3.92979	4.26915	4.20215	4.53075	3.83187	3.69932	4.78302	3.80632	4.4478	5.04759	4.68477
A_51_P114634	6.01658	5.58215	6.05144	5.34394	5.57587	5.95493	6.62556	5.90062	5.99035	5.90364	5.85046	5.83948
A_51_P122238	10.144	10.145	10.0503	10.005	9.81663	10.2649	10.0798	10.1518	10.1504	10.005	10.1485	10.0815
A_51_P114616	5.85046	4.95567	6.3419	5.6686	6.0286	5.52716	5.47946	5.81031	5.69785	5.69321	6.02722	5.77012
A_52_P120122	3.44713	3.88166	4.13873	3.92584	4.33913	3.72228	3.2962	4.7588	3.69469	3.46357	4.86781	3.81489
A_51_P474658	4.84289	4.64087	4.91041	4.57682	4.81327	3.78903	4.3	5.04941	4.2629	4.81327	5.12887	4.88419
A_55_P2185676	3.70394	3.26528	3.87348	3.72683	8.35714	3.14131	2.85598	4.85541	1.88705	4.29081	4.75658	3.98017
A_30_P01024186	4.92037	4.75658	5.70651	5.3848	5.2742	4.95567	4.66476	5.47946	4.18903	4.67421	4.99578	5.60085
A_30_P01017954	4.12845	4.16577	4.51769	2.91296	4.47238	3.83187	3.14131	4.01405	3.36199	3.59375	4.31518	4.52293
A_66_P115757	8.38717	8.47045	8.20116	8.25734	8.34665	8.4011	8.25773	8.32019	8.36573	8.29237	8.27588	8.24392
A_55_P2094324	3.36783	3.41368	4.22162	2.70744	4.64808	3.06436	2.96777	4.52293	3.69469	3.83187	4.12845	5.06206
A_30_P01020068	3.70394	1.7864	4.30305	4.3	4.10768	2.66067	2.19325	4.40019	2.24488	3.71772	6.54481	4.29081
A_52_P266320	7.66615	7.92104	7.39812	7.39438	7.86477	7.3764	7.26474	7.75982	7.50606	7.58614	7.77664	7.66881
A_55_P2001753	4.45877	2.91296	3.92584	2.82238	4.19232	3.2962	4.12845	4.40019	3.14131	3.92979	4.45604	4.16242
A_30_P01026173	4.38013	3.98398	3.75826	4.3272	4.95179	4.69293	4.34506	4.28466	4.33616	4.02886	4.47238	4.29081
A_55_P2136606	4.96724	4.16577	5.1323	5.03665	5.64717	4.88419	4.83975	5.09409	3.90993	4.98538	5.92061	5.35132
A_55_P2065074	4.12845	4.45877	4.22162	3.82764	4.90239	4.15906	4.66476	4.82392	4.33616	4.37434	5.35866	4.7091
A_30_P01029687	3.36783	2.91296	3.92584	3.10684	4.37724	3.59872	3.98398	4.40019	3.14131	3.59375	4.06522	4.20541
A_51_P125691	7.19466	7.20243	7.2569	7.30882	7.26669	7.37278	6.98715	7.25572	7.30995	7.57641	7.56503	7.45182
A_52_P643087	3.70394	3.41368	4.05441	3.78903	4.4478	3.59872	3.57873	4.01405	3.74935	3.46357	4.20215	3.69932
A_51_P117236	7.24506	7.28454	7.19957	7.36112	7.32971	7.3073	6.60286	7.24704	7.20854	7.20162	7.64769	7.36605
A_51_P519251	14.398	14.5468	14.0343	14.1	14.2939	14.2625	14.3815	14.6121	14.873	14.6172	14.8046	14.7016
A_52_P476431	9.54116	9.94531	9.41853	9.73254	9.78032	9.10288	9.52093	10.0511	9.51625	9.83146	9.82063	9.89644
A_55_P2047168	4.3421	3.77592	4.51769	4.12845	4.58936	4.28002	4.52815	4.63362	4.4478	4.20541	4.86781	4.99578
A_55_P2064180	3.36783	4.07596	4.80684	3.78903	4.53075	3.83187	3.57873	4.20867	4.01033	3.59375	4.2629	4.7091
A_55_P2031966	6.22702	6.40887	6.5659	6.83934	6.78587	6.37051	6.39928	6.49503	6.24298	6.503	6.66401	6.78396
A_51_P476960	2.47853	1.52297	4.22162	0.925984	4.40588	1.7864	3.14131	4.54884	3.44161	2.91296	4.75658	3.81489
ERCC-00148_99	7.35526	7.48189	7.60231	8.42788	8.65117	6.84902	7.57199	7.30559	6.97788	7.72757	6.65628	7.99241
A_55_P2037643	3.2962	3.67129	4.22162	4.04716	4.22162	2.86426	3.14131	4.01405	2.75274	2.99819	4.06522	3.81489
A_55_P1955701	5.33354	4.99955	5.76681	5.34394	6.0286	5.21555	5.51407	5.31554	5.00517	5.46864	5.06745	5.71282
A_66_P135165	8.21356	8.36955	8.18338	8.15413	8.55758	7.89198	8.21761	8.17342	8.01234	8.13886	8.23197	8.23856
A_55_P2129691	11.206	11.1486	11.4814	11.2419	11.196	11.1719	11.3151	11.446	11.2708	11.2314	10.8738	11.3753
A_51_P112734	6.79483	5.44675	5.81886	5.92951	6.62739	6.41557	6.04144	6.2222	6.38569	6.51291	6.503	6.60348
A_55_P2025203	3.98398	3.67129	4.69988	3.68537	4.81327	4.11811	3.7627	4.28466	4.01033	3.92979	5.17785	3.98017
A_30_P01027714	6.22702	5.8629	5.95299	5.8421	6.00071	6.11006	5.94326	5.90062	6.08637	6.06767	6.08637	6.13251
A_55_P2017964	3.58124	3.41368	4.95567	3.57873	4.95179	3.83187	3.57873	4.43117	4.04716	3.54308	4.37724	4.58686
A_30_P01030671	3.92584	3.55846	4.63846	3.57873	4.40588	4.02886	3.69932	4.13873	1.88705	4.29081	4.88622	4.02517
A_30_P01020443	5.85046	4.88419	5.63875	5.08438	6.26034	5.95493	5.46592	5.42032	5.86084	5.46864	5.81459	5.26797
ERCC-00081_60	3.36783	3.10684	4.51769	3.78903	4.53075	3.59872	3.69932	4.65525	4.01033	4.20541	4.75658	4.80469
A_30_P01018957	6.86458	6.78095	7.28531	6.84222	6.74358	7.14243	7.21463	6.58731	6.61333	6.57916	6.6164	6.70607
A_55_P2045777	4.26915	4.52554	4.63846	3.16161	5.04578	4.80469	4.21516	4.11811	4.77645	3.92979	4.39734	4.65287
A_55_P2059860	3.14131	2.99819	4.51769	3.72683	4.10768	3.20788	3.57873	3.77153	3.90993	3.98398	4.66476	4.06881
A_55_P1953003	4.99578	3.16161	5.29731	4.22483	4.88419	3.83187	3.98398	4.13873	4.40588	3.71772	4.75658	4.02517
A_51_P126365	2.33698	1.7864	3.92584	3.45811	3.58375	3.83187	2.96777	4.01405	3.03532	3.09282	4.12845	4.11811
A_55_P1955532	7.11516	6.65985	7.26708	6.503	6.46131	8.60637	8.71435	6.61456	7.65008	7.33716	7.36878	6.94971
A_55_P2070786	4.84289	4.58686	5.04759	4.22483	4.64808	5.04941	4.52815	4.57934	4.72055	4.93813	4.75658	4.93813
A_55_P2027412	9.41272	9.69608	10.237	10.0759	9.62653	9.80626	10.1069	9.77415	9.72329	10.01	9.61841	9.76192
A_51_P117087	2.95232	3.59375	3.97827	3.00569	4.47238	4.28002	3.87758	4.31215	4.01033	3.87758	5.19272	4.58686
A_51_P144770	10.465	10.5975	10.5024	10.5012	10.6415	10.4174	10.2715	10.662	10.5759	10.7865	10.5202	10.7349
A_51_P120589	3.70394	3.98398	4.37724	2.37803	4.64808	4.02886	4.12845	4.3421	3.69469	3.59375	3.92188	4.29081
A_55_P2404808	4.12845	3.88166	4.91041	3.57873	4.58936	4.11811	4.59931	4.40019	4.2629	4.12156	4.57682	4.65287
A_30_P01020409	3.2962	3.88166	4.26915	3.68537	4.47238	3.20788	3.2962	3.69469	3.57873	3.71772	4.75658	4.11811
A_30_P01025161	2.95232	3.88166	4.22162	4.26915	6.29367	2.12599	1.37096	4.40019	3.80632	3.59375	5.71282	4.58686
A_52_P114282	7.65933	7.78239	7.57641	7.49411	7.55802	7.59984	7.35563	7.77211	7.73464	7.96633	7.88335	7.75008
A_55_P1978018	3.92584	3.55846	3.92584	3.45811	3.70394	3.59872	3.44713	4.31215	2.96007	1.95058	4.47238	4.47778
A_30_P01031829	4.45877	5.30797	4.77645	5.17785	5.4808	4.91041	5.09761	5.07817	4.96339	5.00517	5.42173	5.39054
A_55_P2045824	3.2962	1.31303	4.22162	3.26528	3.961	3.47443	3.57873	3.77153	4.10069	2.58254	4.77645	4.25033
A_30_P01020248	4.7091	4.07596	4.48317	3.78903	5.04578	4.63241	4.17246	4.73416	4.59931	4.88825	4.7091	5.26797
A_52_P66520	3.20788	1.7864	4.37724	-0.170805	4.19232	3.36199	3.69932	4.57934	2.96007	3.87758	4.66476	3.57873
A_55_P2081273	4.38013	3.41368	4.45055	4.3272	4.33913	3.83187	3.8234	4.82392	3.44161	3.16161	5.39126	5.01264
A_52_P365011	7.1238	7.09397	7.63685	6.78068	7.12445	7.58128	7.50689	7.30901	7.64423	7.40789	7.65576	7.58426
A_52_P580582	9.8268	5.95493	5.29731	5.53237	6.04235	7.15261	12.1581	5.17785	5.33205	5.46864	7.15303	6.25877
A_55_P2117033	8.48361	8.64337	8.95562	9.01318	8.94126	8.5276	8.6325	8.4679	8.38744	8.82134	8.62567	8.92212
3xSLv1	3.44713	2.69821	3.63787	2.37803	4.22162	3.06436	2.85598	3.69469	2.96007	2.27002	4.10768	4.06881
A_55_P1975456	7.96163	8.0612	7.86722	7.86799	8.12256	7.76328	7.87786	7.93339	7.90055	8.02439	7.84255	8.04217
A_55_P2109342	8.76608	9.05446	9.02471	9.15858	9.18154	9.05243	8.97975	9.20618	9.03843	9.31937	9.22789	9.2711
A_30_P01031351	7.35159	7.48189	7.79028	7.47058	7.67824	7.34753	7.53633	7.40647	7.44666	7.58614	7.35453	7.79435
A_55_P2408330	6.77191	7.07604	7.66111	6.41909	7.00598	7.34384	6.8952	7.18126	7.11624	7.29721	7.2395	7.02872
A_55_P2134427	9.55489	9.56778	9.47656	9.73903	9.75424	9.72521	9.69872	9.64098	9.67145	9.78598	9.47689	9.73254
A_55_P2062324	4.02886	3.98398	4.75658	4.57682	4.19232	4.02886	3.8234	4.20867	3.90993	3.83187	4.88622	4.58686
A_52_P431294	3.2962	0.625731	4.13873	2.08408	3.51706	2.55212	3.2962	3.85283	3.2962	2.27002	3.92188	3.14131
A_55_P2130104	5.33354	5.23483	5.46999	5.17785	5.60827	5.65076	5.00142	5.3848	5.93738	5.62541	5.6792	5.90464
A_51_P104718	1.30151	3.10684	5.90264	1.68799	3.70394	2.55212	3.21438	4.13873	1.88705	1.95058	4.34506	3.81489
A_30_P01018437	4.96724	4.95567	4.63846	5.34394	5.30949	4.65525	5.46592	5.45363	4.66239	5.53496	5.53237	5.30797
A_51_P118132	9.88167	9.99587	9.68951	10.0024	9.97554	9.48782	9.38355	10.1149	9.99322	10.0526	9.86107	10.132
A_55_P2102664	6.27749	6.64221	6.92271	7.06553	6.8669	6.48701	6.68869	6.4579	6.51882	7.01484	6.03412	6.96278
A_51_P435198	10.2339	10.2589	10.6323	10.4658	10.0864	10.9004	10.5218	10.3087	10.3835	10.3427	9.99363	10.0467
A_51_P218041	3.36783	3.26528	4.30305	3.26528	3.58375	3.72228	3.92584	4.20867	3.69469	4.02886	4.10768	3.81489
A_51_P165934	10.8324	11.0338	11.2741	11.2677	11.0037	11.434	11.4259	11.2314	11.0028	11.1193	10.8553	11.155
A_55_P1987336	3.8234	4.38876	4.66476	3.57873	4.58936	3.20788	3.69932	4.3421	4.37724	4.29081	3.92188	4.3272
A_51_P121818	9.95254	9.90198	10.0923	10.0541	10.0704	10.2636	10.0255	10.0976	10.2294	10.1124	9.83501	10.1489
A_30_P01026525	4.21516	3.26528	3.63787	4.16242	4.64808	3.72228	4.12845	3.77153	4.51243	3.59375	4.20215	4.4478
A_30_P01028640	4.52554	4.58686	5.43568	2.82238	4.01405	3.68069	4.4615	5.28349	4.82604	5.21555	5.56066	4.93813
A_51_P117115	4.21516	3.98398	3.97827	4.3272	4.7068	4.4615	4.21516	4.63362	4.59931	4.25033	4.57682	5.17785
A_30_P01027048	2.95232	3.98398	4.75658	3.82764	4.01405	3.36199	3.92584	4.40019	3.14131	3.32048	4.2629	5.15947
A_30_P01028853	5.82735	6.34264	6.43307	6.06318	6.19045	5.90464	6.23901	6.27826	6.10744	6.61885	6.35076	6.37124
A_55_P1964648	4.48585	4.75658	3.92584	3.95326	5.81566	3.59872	4.9479	5.07817	4.53853	3.59375	4.77645	4.52293
A_55_P2102816	12.4628	12.4807	12.3206	12.449	12.4652	12.2695	12.2471	12.5396	12.4115	12.2809	12.3687	12.4546
A_55_P1955483	10.5134	11.1134	10.7	10.586	10.3191	10.3644	10.3335	10.5857	10.381	10.4017	10.4028	10.3519
A_51_P124719	5.69437	5.90464	5.96363	5.90264	5.80387	5.63754	5.53237	5.78655	6.00071	5.90364	5.92951	6.09034
A_51_P211325	8.00884	7.9067	8.18069	7.74112	7.63353	8.26732	8.1005	7.83335	7.88564	7.64918	7.65307	7.65844
A_55_P2164055	4.64568	4.80684	5.04759	4.52031	5.04578	4.20215	4.2629	4.20867	4.33616	4.02886	5.0888	5.22522
A_30_P01031037	5.44123	5.4329	5.04759	4.57682	4.7068	5.04941	5.03114	4.78302	4.92037	5.21555	5.71282	5.33205
A_30_P01029915	4.12845	4.07596	4.22162	4.3627	4.10768	4.02886	4.02886	4.25033	3.80632	4.29081	4.80469	4.37434
A_55_P2039044	3.65229	3.41368	4.22162	4.04716	4.4478	3.83187	3.44713	3.98017	4.01033	3.26528	4.57682	4.76544
A_30_P01022811	4.45877	3.88166	4.57934	3.87758	4.95179	3.47443	3.8234	4.57934	4.2629	4.40304	4.80469	4.80469
A_55_P2025258	4.38013	2.99819	4.34506	3.10684	4.58936	3.72228	2.19325	6.36833	3.57873	3.67129	3.92188	4.4478
ERCC-00053_71	3.92584	3.32048	3.92584	2.82238	4.10768	2.96777	2.06985	3.69469	2.75274	3.59375	3.75381	4.82604
A_30_P01027121	4.92037	4.67421	5.25701	4.76544	5.08704	5.04941	4.38876	5.04941	5.04759	4.9144	5.12887	5.13572
A_51_P180176	5.05485	5.46592	5.29731	4.63846	5.36597	5.13401	4.78302	5.51012	5.11159	5.32607	4.96916	5.33205
A_51_P236469	7.63685	7.64649	8.09182	7.21422	7.27487	8.11336	7.85338	7.81104	7.54456	7.51808	8.11824	7.47159
A_55_P1961433	4.45877	1.7864	4.22162	3.16161	4.40588	1.95058	2.75274	4.07952	3.2962	3.83187	4.80469	4.11811
A_55_P1964368	5.74232	4.93026	6.18468	4.81967	5.15947	6.07749	5.69321	5.21231	6.09606	5.17452	5.72651	5.39054
A_55_P2248095	4.52554	4.16577	4.45055	4.3272	4.26915	3.59872	3.69932	5.63754	3.90993	4.12156	5.42173	4.88419
A_55_P2164221	17.0328	17.0328	16.8581	16.772	16.9079	16.8427	16.8729	16.8889	16.8191	16.7467	16.6901	16.8022
A_51_P114966	7.11516	7.41566	7.08868	6.84222	7.00036	7.1604	7.36878	7.43732	7.20854	7.26474	6.95989	7.31014
A_30_P01023864	3.20788	3.10684	4.22162	3.63304	4.30305	3.36199	2.75274	4.25033	3.80632	3.92979	4.2629	4.11811
A_55_P2092958	5.13914	4.75658	5.36743	3.82764	5.04578	5.25228	5.04941	6.0899	5.9588	5.04941	5.12887	5.04578
A_55_P2131979	12.5984	13.2273	13.1485	13.0889	13.3981	12.4163	13.6413	13.7704	12.7559	13.2273	13.4213	13.5812
A_30_P01027040	3.44713	2.99819	3.57873	2.82238	3.2962	3.06436	2.96777	3.26528	3.69469	3.83187	4.12845	4.02517
A_51_P100625	3.70394	1.7864	3.63787	2.63187	2.58254	4.20215	2.19325	4.28466	3.14131	3.92979	4.12845	3.14131
A_52_P586004	5.61073	5.20255	5.36743	5.10287	5.4808	5.30797	5.66505	5.99507	5.71282	5.46864	5.94228	5.63512
A_30_P01031282	4.12845	4.55653	4.37724	4.26915	5.49953	3.56356	3.98398	4.57934	4.18903	4.60427	5.16115	4.68477
A_51_P224175	7.39955	7.40913	7.3353	7.29702	7.28685	7.45832	7.44441	7.51315	7.25296	7.07849	7.42548	7.12574
A_55_P2088268	3.8234	2.57247	4.22162	3.32048	2.81386	2.43473	3.14131	4.04351	4.01033	3.59375	4.02886	4.02517
A_55_P2047196	3.77153	3.77592	3.87348	3.68537	3.8234	2.86426	4.12845	4.01405	3.94937	3.71772	6.57476	4.02517
ERCC-00003_63	3.51706	2.91296	3.57873	2.82238	3.961	3.47443	2.96777	4.28466	3.14131	3.16161	4.6239	4.16242
A_30_P01025872	4.02886	3.77592	3.75826	3.68537	4.33913	3.59872	2.96777	4.37724	3.62818	4.16577	4.28774	4.29081
A_66_P104833	3.58124	2.69821	4.22162	3.72683	4.22162	3.47443	2.48927	4.13873	2.96007	4.12156	4.37724	3.98017
A_30_P01025563	4.30305	4.16577	4.91041	3.68537	4.64808	3.83187	3.36783	4.52293	3.2962	3.71772	4.42838	4.20541
A_55_P2009943	9.53363	9.65439	9.43569	9.26388	9.13899	9.6004	9.00161	9.40963	9.60854	9.44392	9.88689	9.41853
A_55_P2002954	4.73867	4.24716	5.25701	5.30341	5.46592	5.11506	4.83975	6.43307	5.25701	5.36378	6.88659	5.50218
A_51_P385635	11.5884	11.5739	12.0137	11.5597	11.4743	11.9015	11.8116	11.6011	11.6792	11.4161	11.4279	11.4698
A_55_P2246700	6.95964	7.12035	6.94289	6.78068	7.55802	6.72835	6.81312	7.19302	6.69102	6.97883	7.64453	6.86767
A_30_P01030768	4.38013	3.98398	4.37724	4.84708	4.19232	4.31518	3.8234	5.65494	3.69469	4.64087	7.29702	4.29081
A_55_P2117764	5.26172	5.04578	5.17119	4.45877	4.85955	5.21555	4.86781	5.26485	5.20906	5.00517	5.27885	4.85541
A_30_P01025002	4.38013	3.26528	4.80684	3.82764	4.10768	2.12599	2.48927	4.57934	4.01033	4.29081	4.96916	3.92584
A_55_P1995427	5.61073	5.92951	5.81886	5.4982	6.2406	5.09057	5.25701	5.74736	5.74007	5.70938	5.17785	5.74232
A_52_P373893	8.98362	9.04539	8.76491	8.48646	8.77941	8.70704	8.46229	8.72078	8.78092	8.62354	8.76408	8.40181
A_52_P23661	3.92584	4.52554	5.21716	4.12845	5.2742	3.47443	3.69932	5.28349	4.53853	4.64087	4.37724	4.88419
ERCC-00062_278	4.02886	4.16577	4.75658	3.95326	4.99578	4.20215	3.7627	5.47946	4.10069	4.70219	4.20215	4.74541
A_30_P01024081	9.04334	9.33164	9.57981	9.57993	9.61764	9.36073	9.76855	9.81206	9.52048	9.74075	9.56671	9.82166
A_55_P2115141	6.13079	6.12305	6.47625	6.2222	6.27671	6.25011	5.78655	6.01287	6.17556	6.15377	6.4	6.14445
A_55_P2180156	2.95232	3.67129	4.40871	3.87758	4.47238	3.06436	3.2962	3.69469	3.74935	4.20541	4.57682	4.96339
ETG10_13482	4.02886	2.57247	5.04759	3.00569	4.7068	2.12599	3.8234	4.3421	2.96007	3.87758	3.92188	4.37434
A_30_P01024923	3.20788	3.41368	4.69988	3.10684	4.47238	3.20788	3.44713	4.40019	2.85598	3.71772	3.99155	4.6239
A_30_P01024501	4.86781	4.83449	5.11159	5.3848	5.3848	4.95567	5.29731	5.07817	4.40588	5.32607	4.88622	5.04578
A_55_P2178036	3.36783	3.26528	4.37724	3.87758	4.19232	3.36199	3.69932	3.72683	3.62818	4.12156	4.80469	4.02517
A_55_P2114838	13.8001	13.8283	13.4731	13.5349	13.5953	13.5692	13.5028	13.6169	13.5307	13.5812	13.2559	13.57
A_30_P01033284	4.96724	4.72283	4.98063	4.09014	4.90239	4.95567	5.03114	5.35132	5.00517	4.81327	5.32607	4.96339
A_52_P339722	10.8269	11.2432	11.1136	11.2563	11.2414	10.6567	11.0568	10.8675	10.7501	10.831	10.7675	10.936
A_52_P488427	6.57192	6.57476	6.25955	6.29673	6.53057	6.40568	6.33893	6.6916	6.89571	6.61885	6.59728	6.8952
A_55_P1975667	4.30305	3.77592	4.57934	4.57682	4.58936	3.47443	3.87758	4.78302	4.40588	3.16161	7.19548	3.92584
A_30_P01020724	8.11802	8.23676	8.02462	7.83309	8.23187	8.0852	7.87454	7.98341	8.10236	8.06199	8.14376	8.16045
A_55_P2117146	8.92193	9.8137	9.72453	9.75751	9.86726	8.74242	9.68889	9.71358	8.84193	9.4068	9.14166	9.59256
A_55_P1991440	10.1571	10.3538	10.2637	10.2247	10.1863	10.4045	9.81513	10.2807	10.0676	10.2225	10.1464	10.0444
A_30_P01031650	4.08307	2.91296	4.22162	3.45811	3.8234	4.02886	3.57873	4.54884	2.75274	3.16161	5.04759	3.69932
A_30_P01030711	3.8234	3.41368	4.30305	3.16161	4.26915	3.36199	3.69932	4.40019	4.18903	3.59375	4.12845	4.06881
A_55_P1958503	4.30305	3.98398	4.37724	4.12845	4.47238	3.44161	3.04991	4.82392	4.01033	3.71772	4.6239	4.29081
A_52_P67995	9.56302	9.51149	9.44279	9.47689	9.53898	9.68809	9.76347	9.67108	9.72851	9.6599	9.67902	9.62873
A_66_P114042	4.08307	4.38876	4.80684	5.70363	4.81327	3.72228	3.63787	5.78655	4.3	4.25033	5.92951	4.47778
A_55_P2457153	6.79915	7.43802	7.36441	7.4891	7.44217	6.91027	6.92815	7.14774	6.69102	7.02641	6.8417	7.13753
A_52_P111845	3.44713	2.69821	3.50652	2.70744	4.33913	2.43473	3.44713	2.99819	2.75274	1.4913	3.32048	3.92584
A_51_P482148	5.31554	5.09761	5.33354	5.03665	5.17785	4.49388	5.42872	5.35132	5.03298	5.32607	5.39126	5.60085
A_55_P2125823	12.2127	12.1122	11.9047	11.9304	12.068	11.9302	11.7328	11.8241	11.978	11.9309	11.7982	11.9117
A_66_P102581	10.1539	10.1236	9.86855	9.95815	10.1604	9.87288	9.73948	9.88237	10.1027	10.1219	10.0358	10.1098
A_55_P1986701	4.38013	3.41368	3.75826	3.57873	4.19232	3.36199	3.14131	3.72683	3.44161	3.87758	4.31518	4.40304
A_51_P112355	9.67034	9.49058	9.81243	9.02078	9.1933	10.5377	10.0386	9.75118	9.43613	9.12571	9.2319	8.9578
A_55_P2088237	4.30305	3.98398	5.04759	4.63846	4.90239	4.49388	3.92584	4.6836	4.66239	4.86575	4.55141	4.93813
A_51_P179531	4.12845	4.24716	5.21716	4.20215	5.12543	4.69293	4.34506	4.9939	4.77645	4.53853	5.12887	5.61564
A_55_P2040583	11.2542	11.18	11.6128	11.6832	11.5558	11.4114	11.5602	11.3702	11.2357	11.4555	11.2171	11.5884
A_30_P01031337	6.9623	7.07604	6.8417	6.59914	6.87997	6.89722	6.83645	6.79969	6.75029	6.44692	7.09309	6.71525
A_55_P1991770	12.917	12.7483	12.31	12.5097	12.548	12.2266	11.8552	12.4567	12.6293	12.322	12.5443	12.2814
ERCC-00039_95	3.8234	2.91296	4.22162	4.3627	4.26915	2.86426	3.92584	4.40019	2.96007	4.07596	3.7977	5.06206
A_51_P117604	10.4538	10.5112	10.4465	10.3298	10.4887	10.6055	10.3643	10.6055	10.5863	10.605	10.73	10.5361
A_55_P1994633	4.30305	4.42838	4.66476	4.04716	4.58936	4.75435	4.12845	5.87422	4.01033	4.4478	4.96916	4.55397
A_52_P347764	4.30305	4.3212	4.63846	4.20215	5.58966	4.49388	4.63846	4.52293	4.4478	4.12156	4.57682	5.20418
A_55_P2400691	10.5571	10.6912	10.6972	10.4579	10.6077	10.7794	10.5865	10.6722	10.8187	10.6547	10.8137	10.6319
A_30_P01025678	4.12845	4.16577	4.63846	3.45811	4.33913	3.72228	3.8234	4.20867	4.72055	4.12156	4.42838	5.22522
A_30_P01030886	4.30305	2.91296	4.6092	3.45811	4.64808	3.92979	3.69932	4.63362	3.2962	3.71772	4.80469	4.65287
A_55_P1978336	5.4632	6.07482	6.12822	5.87422	6.00071	5.89558	5.92951	5.86187	5.88036	6.25955	5.96411	6.33819
A_30_P01031093	4.21516	4.12156	4.83449	3.16161	4.53075	3.92979	3.87758	4.6836	4.40588	3.59375	4.2629	4.06881
A_51_P435363	9.8504	10.3777	11.1584	10.5585	10.2283	10.7726	11.1171	10.3876	10.3482	10.3427	9.94723	9.96246
A_52_P116134	12.791	13.124	13.0472	12.7756	13.0081	13.1002	12.9303	13.2785	13.1874	13.1002	13.2283	13.0358
A_55_P1960659	4.61902	4.95567	5.04759	4.89837	5.57587	4.91041	4.96916	5.28349	4.59931	4.64087	5.19272	4.80469
A_55_P1991945	7.09968	7.68058	7.37405	7.41548	7.64903	6.97095	7.71903	7.52512	7.00036	7.54134	6.94874	7.54939
A_66_P114582	4.02886	3.41368	4.13873	2.63187	4.19232	3.59872	3.44713	4.20867	3.57873	3.71772	3.99155	4.02517
A_55_P2055864	5.09761	4.72283	5.4048	4.81967	4.95179	5.17119	5.09761	4.90038	4.75212	5.03298	4.84708	4.93813
A_66_P111490	3.8234	3.41368	4.51769	3.68537	3.87348	3.36199	3.14131	4.18903	4.01033	3.16161	4.45604	4.37434
A_55_P2106700	4.18242	3.26528	4.10768	3.32048	4.47238	2.43473	3.2962	4.92037	3.57873	4.20541	4.52554	3.81489
A_30_P01029368	2.95232	3.26528	4.5437	2.08408	3.36783	3.20788	3.04991	3.72683	3.57873	2.69821	4.12845	3.5118
A_55_P2107995	4.02886	4.16577	4.45055	4.09014	5.20255	4.49388	3.50652	5.04941	4.10069	4.4478	4.59683	5.04578
A_55_P2139886	4.30305	3.77592	4.85541	3.78903	4.90239	4.11811	4.02886	4.96532	4.51243	3.92979	4.64568	4.76544
A_52_P257758	3.8234	3.41368	4.01405	3.68537	4.64808	2.66067	3.57873	5.04941	3.36199	4.29081	5.00517	5.8515
A_55_P1972991	10.9492	11.0145	10.7278	10.6817	10.851	11.3015	11.1097	10.9307	11.0885	11.0798	11.0677	10.9484
A_30_P01018376	4.52554	4.95567	4.91041	4.3272	5.45225	4.42838	4.38876	4.87807	4.47238	4.64087	4.51243	5.35132
A_52_P116253	5.87422	5.70247	6.36104	5.85773	6.00071	5.58341	5.91862	6.44623	5.57838	5.87729	5.95396	6.42959
A_55_P2202184	4.02886	3.32048	4.37724	3.87758	5.08704	3.36199	2.96777	3.98017	3.69469	4.07596	4.16577	4.16242
A_30_P01027718	3.8234	2.4458	3.2962	3.78903	6.04235	3.44161	2.48927	3.98017	3.50652	3.41368	3.75381	2.75274
A_30_P01025243	4.18242	1.52297	4.85541	4.20215	7.28685	4.24399	3.57873	4.13873	3.80632	4.02886	4.2629	4.20541
A_51_P232142	9.32641	9.36676	9.29028	9.1863	9.33295	9.47791	9.26842	9.41264	9.45586	9.51921	9.29163	9.37881
A_51_P112308	9.44016	9.12339	9.7725	9.4456	9.49733	10.0219	9.43929	9.09108	10.0361	9.67594	9.65864	9.33313
A_55_P2077497	13.643	14.3307	14.1163	14.3611	14.337	13.8391	14.1334	13.8297	13.5316	14.3143	13.6609	14.2222
A_55_P1997585	4.7091	5.04578	5.04759	5.03665	5.42032	4.07596	4.66476	4.87807	4.13531	5.21555	4.96916	5.01264
A_30_P01032673	4.8154	4.58686	4.72283	4.38876	5.39911	4.63241	4.66476	4.6836	4.18903	4.64087	5.74007	5.0888
ERCC-00147_344	3.03532	2.4458	4.05441	3.78903	4.40588	3.06436	3.63787	4.07952	2.96007	2.58254	4.39734	3.75826
A_55_P2159865	7.68935	7.54279	7.41794	7.58645	7.46786	7.29854	7.14434	7.55739	7.44666	7.55291	7.66763	7.49577
A_55_P2115851	3.51706	2.80528	3.75826	3.32048	4.30305	3.47443	3.2962	4.01405	3.03532	3.71772	5.19272	4.52293
ERCC-00012_90	4.21516	4.38876	5.0033	4.94595	5.29272	4.24399	4.38876	4.82392	4.01033	4.51507	5.58716	4.99578
A_55_P2013158	6.0286	6.09343	6.72835	6.41909	6.40993	6.16093	6.10919	6.27826	6.33596	6.48029	6.43654	6.41768
A_30_P01033143	3.70394	2.18004	4.05441	3.57873	3.92188	3.36199	3.50652	3.81489	3.36199	3.46357	3.99155	2.75274
A_55_P2089467	4.64568	3.98398	4.45055	3.68537	4.40588	2.86426	1.83762	4.40019	4.3	3.71772	4.31518	4.47778
A_52_P637282	9.89423	9.81169	9.40032	9.77851	10.0421	9.58244	9.41998	9.65111	9.94999	9.80794	9.78325	10.0344
A_65_P16630	4.8154	4.28466	5.1323	4.26915	5.36597	4.28002	4.66476	5.21231	5.1323	5.26953	4.84708	5.26797
A_55_P2048508	4.58686	4.38876	4.63846	4.38876	6.11353	4.07596	3.7627	4.28466	4.66239	4.51507	5.98466	5.26797
A_30_P01031930	3.70394	4.64087	4.57934	4.48585	5.01264	4.28002	4.81327	4.87807	4.66239	4.57682	4.80469	5.11332
A_30_P01027340	4.52554	4.07596	5.46999	4.76544	4.64808	4.75435	4.52815	5.09409	4.40588	4.7588	4.96916	5.17785
A_55_P2149791	4.30305	4.07596	4.63846	4.60179	4.85955	4.49388	4.12845	4.4615	4.2629	4.4478	4.7091	4.4478
A_30_P01029403	4.21516	3.59375	4.77645	3.57873	4.7068	3.59872	4.21516	4.07952	4.57682	4.70219	4.52554	4.82604
A_66_P101786	2.71203	3.55846	4.22162	3.5118	4.40588	3.72228	3.2962	3.58375	3.74935	4.25033	3.92188	3.92584
A_55_P2085979	8.65721	8.54412	8.7933	8.8495	8.95707	8.82387	8.67644	8.86157	8.75137	8.86157	8.29802	8.92212
A_51_P217598	4.21516	3.10684	3.2962	3.78903	4.51243	3.83187	3.63787	4.13873	3.2962	3.46357	4.57682	4.37434
A_55_P2358299	2.95232	3.26528	3.81489	3.45811	3.87348	3.06436	2.96777	3.58375	3.14131	2.99819	4.37724	4.37434
A_55_P1969885	6.94728	7.42496	7.35893	7.4648	7.59984	7.00925	7.25749	7.30559	7.07046	7.26004	6.78505	7.41566
A_55_P2287105	3.2962	2.4458	3.63787	2.63187	4.33913	3.2962	3.57873	3.55846	3.2962	2.27002	4.2629	4.11811
A_55_P2073642	7.06733	7.17856	7.21179	7.29702	7.03377	7.59394	7.68614	7.11016	7.21786	6.94557	6.72096	7.18312
A_30_P01024658	3.51706	2.91296	5.01822	3.45811	4.58936	4.24399	3.87758	4.6836	4.33616	4.12156	4.88622	5.41046
A_30_P01017657	5.31554	5.04578	5.4048	4.89837	5.53237	4.95567	5.04941	5.04941	5.17119	5.32607	5.35866	5.54401
A_51_P101375	4.76102	4.48853	5.33354	4.79606	5.23643	4.56671	4.63846	5.15778	4.40588	5.00517	4.86781	5.29118
A_30_P01031899	4.12845	2.18004	3.57873	1.83762	3.51706	1.7864	3.44713	3.47443	2.49994	3.16161	3.56356	4.58686
A_52_P401475	3.70394	3.32048	4.30305	3.78903	4.47238	3.20788	3.44713	3.58375	3.90993	4.07596	4.10768	3.81489
A_55_P2001510	16.035	16.2576	16.5597	16.4697	15.9288	16.6465	16.6761	16.1456	16.4023	16.4494	15.895	16.0687
A_55_P2021378	9.27503	9.18733	9.38602	9.37597	9.31626	9.34205	9.24879	9.24275	9.30233	9.67454	9.44439	9.37881
A_30_P01032696	3.92584	3.77592	5.80602	3.78903	4.7068	3.06436	1.83762	4.13873	3.2962	3.67129	4.37724	4.3272
A_30_P01033588	4.12845	3.88166	4.95567	4.20215	4.53075	3.59872	3.8234	3.92979	3.90993	4.29081	4.10768	4.55397
A_55_P2051787	3.8234	3.41368	4.13873	3.16161	4.22162	3.06436	3.98398	4.07952	4.01033	4.25033	4.52554	4.25033
A_55_P2038822	4.21516	3.55846	4.95567	3.87758	4.7068	4.56671	4.3	4.82392	4.18903	3.92979	5.56066	4.65287
A_55_P2027042	3.58124	3.67129	4.63846	3.32048	4.19232	2.86426	4.12845	4.40019	3.90993	3.71772	3.1138	4.58686
A_55_P2114697	13.4985	14.0797	13.8403	14.1456	14.2014	13.2299	13.6722	13.5232	13.0836	14.1017	12.5369	13.9182
A_30_P01026324	7.08249	7.07604	7.68292	7.37676	7.30901	7.18993	7.30331	7.55547	7.23392	7.14498	6.30436	7.34753
A_30_P01020924	3.14131	3.88166	3.97827	3.87758	4.05441	2.66067	4.12845	3.77153	3.57873	3.16161	4.37724	4.37434
A_55_P1992530	4.79172	2.99819	4.85541	4.12845	4.93026	4.20215	4.57682	4.63362	4.33616	4.3272	4.34506	4.37434
A_55_P2106801	4.92037	5.4329	5.33354	5.27885	5.7468	5.52716	5.42872	5.65494	5.64837	5.5934	4.80469	5.39054
A_55_P2170817	4.02886	3.92979	4.22162	3.95326	4.7068	3.36199	3.57873	4.6836	3.62818	3.77153	3.94937	4.25033
A_55_P1967478	3.51706	4.16577	4.66476	3.78903	4.64808	3.47443	3.8234	5.86187	4.04716	4.40304	4.28774	4.20541
A_55_P1968320	3.87758	3.55846	4.75658	3.87758	4.7068	3.59872	4.2629	5.3848	4.18903	4.02886	4.96916	4.20541
A_30_P01025820	2.95232	2.18004	4.26915	3.16161	4.73867	3.83187	3.8234	4.07952	3.14131	2.69821	4.96916	3.92584
A_30_P01032978	5.52716	5.71511	6.07749	6.00914	6.30131	5.39626	5.99507	6.04144	5.66505	6.06767	5.45088	6.33819
A_55_P2089500	3.92584	3.26528	4.75658	3.32048	4.47238	3.44161	3.7627	3.47443	3.69469	3.71772	5.63754	4.76544
A_30_P01019936	5.71854	6.26543	6.45995	5.56828	5.77342	5.76902	5.85358	6.41698	5.57838	6.15377	5.74007	5.95493
A_55_P2023523	4.48585	5.21878	5.70651	5.1323	4.76102	4.63241	4.78302	5.70938	4.77645	4.9144	4.75658	5.04578
A_51_P124798	8.5595	8.36427	8.8395	8.36773	8.19235	9.19103	9.06774	8.45982	8.47907	8.53686	8.41614	8.35833
A_55_P1952915	13.183	13.3272	12.6381	12.7922	13.1206	12.7339	12.3673	13.1858	12.9878	13.0424	13.2065	12.97
A_55_P1977345	2.47853	2.80528	3.87348	3.00569	5.20255	0.897474	2.63187	5.15778	2.85598	3.32048	2.95232	4.29081
A_55_P2123484	9.02211	9.12339	8.65743	8.62658	9.32388	8.53459	8.1871	8.80161	8.71185	8.41552	8.64532	8.47679
A_30_P01027307	4.61902	4.3212	3.87348	4.20215	4.01405	4.11811	3.2962	3.85283	4.57682	4.57682	4.52554	4.20541
A_55_P2262743	4.21516	3.10684	4.30305	3.95326	4.26915	3.72228	3.44713	4.01405	3.44161	4.20541	4.20215	4.65287
A_55_P2164694	5.47811	5.49687	5.74904	5.56828	5.39911	5.63754	5.69321	5.60085	5.63512	5.62541	5.78873	6.1118
A_55_P2083454	4.64568	4.69988	5.17119	3.87758	4.76102	3.83187	3.8234	4.7588	4.2629	4.64087	4.47238	4.47778
A_52_P127362	10.5596	10.5266	10.5291	10.1799	10.4269	11.0386	10.6467	10.6008	10.9788	10.5846	10.5473	10.3507
A_55_P1954388	3.70394	2.69821	4.13873	3.00569	4.01405	4.02886	0.036544	4.13873	3.03532	3.54308	4.31518	3.92584
A_55_P2029895	2.71203	3.59375	3.63787	3.72683	5.90464	3.68069	3.36783	3.92979	4.18903	4.16577	4.20215	3.57873
A_66_P108468	5.42732	5.26953	6.11353	5.08438	5.4808	5.73387	5.81459	5.24596	5.27575	5.04941	5.32607	4.88419
A_30_P01033203	4.67891	4.38876	4.80684	4.86781	4.7068	4.24399	4.07952	6.10133	4.92037	5.04941	5.26172	4.65287
ERCC-00077_121	3.92584	3.10684	4.6092	3.57873	5.80387	3.72228	3.2962	4.40019	4.82604	4.40304	3.99155	5.13572
A_51_P103706	3.58124	3.88166	4.37724	3.78903	4.47238	2.55212	2.96777	4.40019	3.57873	3.92979	4.10768	4.29081
A_55_P2051414	12.2498	12.4644	12.0688	12.0458	12.2853	11.9604	12.0352	12.5997	12.2768	12.2602	12.4546	12.2843
A_55_P1993353	3.8234	3.71772	4.45055	3.57873	4.33913	3.47443	3.7627	3.85283	4.13531	4.57682	5.16115	4.37434
A_30_P01020233	4.58686	4.07596	5.60827	4.20215	5.2742	4.35977	4.21516	4.4615	3.90993	4.64087	4.39734	4.37434
A_30_P01022026	5.222	4.99955	5.76681	4.63846	5.45225	4.35977	4.66476	5.63754	4.47238	4.93813	4.80469	4.58686
A_52_P45841	6.06946	5.88443	5.94228	5.56828	5.77342	6.33372	5.96555	6.21493	6.15799	5.6792	6.07571	5.97991
A_55_P2049597	8.52964	8.39986	8.412	8.05229	8.20391	8.52336	8.30431	8.40846	8.63583	8.31095	8.58977	8.11824
A_51_P100624	3.92584	2.4458	4.05441	3.68537	3.8234	2.43473	3.21438	3.77153	3.69469	2.81386	3.02058	4.65287
A_66_P100496	2.95232	2.80528	4.13873	3.95326	4.40588	3.72228	2.75274	4.04351	3.80632	4.02886	4.64568	4.7091
A_55_P1974804	5.66623	5.82417	5.27885	5.42453	5.54787	5.39626	5.00142	6.4	5.20906	5.39911	5.90264	5.92951
A_30_P01030305	7.7216	7.65322	7.96368	7.79408	7.55802	8.19829	7.84608	7.78225	7.64694	7.24941	7.97603	7.38757
A_55_P2179074	5.52716	5.4329	6.07749	4.74092	3.92188	5.17119	5.04941	6.02399	5.20906	5.62541	6.8417	5.65076
A_30_P01020670	3.58124	3.67129	4.30305	4.09014	3.87348	3.20788	3.57873	4.4615	3.57873	4.47238	4.7091	4.58686
A_55_P1979650	11.3506	11.0295	11.6681	11.3635	10.9866	11.5483	11.3687	11.3548	11.5054	11.1435	11.2126	11.0181
A_52_P487436	4.45877	3.41368	3.50652	3.45811	5.61809	2.66067	3.98398	4.07952	4.18903	4.29081	4.75658	4.91041
A_52_P1035965	4.64568	3.71772	3.50652	3.00569	4.26915	3.59872	3.44713	4.63362	3.2962	3.92979	4.31518	3.81489
A_55_P2081885	14.7739	14.8834	14.5993	14.7288	14.7825	14.6992	14.6732	14.8533	14.7844	14.6264	14.7542	14.6782
A_52_P409675	6.03916	5.99695	5.978	5.3848	5.78981	6.2406	5.76902	5.83474	5.83316	5.87729	6.30436	5.90464
A_55_P2132932	5.35132	5.49687	5.67332	5.51801	5.97848	5.75907	5.53237	5.83474	5.34542	5.72082	7.0878	5.92951
A_51_P148478	3.03532	2.91296	3.03532	2.70744	3.70394	3.14131	2.96777	4.20867	3.36199	4.02886	2.95232	3.57873
A_52_P745	9.69034	9.74454	9.99534	9.50509	9.40361	9.89644	9.78867	9.72847	9.78107	9.48815	9.87631	9.43894
A_55_P2079024	3.92584	2.57247	4.13873	2.37803	4.10768	3.98398	1.37096	2.99819	2.75274	4.16577	4.20215	3.37364
A_30_P01031719	4.08307	4.07596	4.26915	3.78903	4.26915	3.72228	3.2962	4.48585	3.69469	4.20541	6.15124	6.30702
A_55_P1973543	5.88647	5.44675	5.55939	4.89837	5.66505	5.23323	5.46592	5.54014	5.50946	5.09057	5.50284	6.1118
A_51_P396385	5.59961	5.49687	5.19436	4.54112	5.49953	5.39626	5.27497	6.06946	5.24438	5.45637	5.46592	5.33205
A_55_P2278093	4.76102	4.93026	5.0033	4.42559	6.33372	5.11506	4.7251	4.90038	4.40588	4.9144	6.17971	4.88419
A_55_P2095899	5.90062	5.51012	5.25701	4.74092	5.2742	5.4982	5.46592	6.35076	5.20906	5.09057	6.60348	5.04578
A_51_P201480	11.9386	11.8475	12.0096	11.7598	12.0352	11.7361	11.6948	12.0086	11.9161	12.0519	12.1449	12.0996
A_66_P105497	3.92584	3.46357	4.22162	2.63187	3.58375	2.55212	2.85598	3.77153	3.90993	2.99819	4.2629	3.6427
A_55_P2142439	8.8037	8.93986	9.45907	8.54315	8.51393	9.36566	8.99797	9.0968	9.24563	8.91554	9.05684	8.56117
A_30_P01020448	3.92584	3.67129	3.87348	3.16161	6.93406	3.06436	3.63787	3.77153	3.36199	3.87758	4.93026	4.6239
A_55_P2085165	4.08307	3.77592	4.57934	3.78903	5.82841	4.02886	4.38876	4.54884	4.18903	3.59375	4.20215	4.11811
ERCC-00131_64	4.08307	3.26528	4.37724	3.16161	4.7068	3.83187	3.87758	4.82392	3.69469	3.87758	4.28774	4.06881
A_55_P2084152	3.2962	2.69821	4.45055	3.39094	4.10768	4.20215	3.21438	4.13873	3.14131	3.59375	4.88622	3.92584
A_30_P01027826	4.45877	4.24716	4.95567	4.45877	4.81327	4.42838	4.21516	4.40019	4.92037	5.04941	4.28774	4.58686
A_55_P1974869	2.85182	2.18004	4.37724	3.00569	4.10768	3.92979	3.2962	3.85283	3.69469	3.83187	4.12845	4.02517
A_30_P01029261	3.44713	2.30693	4.05441	3.68537	4.10768	3.47443	2.63187	3.85283	2.49994	3.71772	3.56356	4.4478
A_30_P01028709	3.2962	2.91296	5.0888	3.95326	4.26915	3.44161	3.69932	4.4615	3.44161	4.81327	4.77645	3.92584
A_30_P01029850	3.65229	2.91296	5.0888	3.87758	4.26915	3.72228	3.2962	6.51225	4.87602	3.92979	5.0888	4.82604
A_30_P01019177	4.02886	3.26528	3.63787	3.87758	4.40588	4.02886	1.37096	4.01405	3.69469	4.07596	4.86781	4.20541
A_30_P01026635	2.60248	3.41368	4.01405	3.32048	4.19232	3.06436	3.2962	3.92979	3.57873	4.29081	3.99155	5.61564
A_55_P2272563	0.327023	3.26528	4.75658	3.5118	4.51243	3.47443	3.44713	4.40019	3.44161	3.46357	5.0888	4.25033
A_52_P671676	2.47853	2.91296	4.40871	3.95326	4.19232	3.98398	2.96777	3.98017	4.37724	4.12156	5.53237	4.16242
A_51_P102789	10.6119	10.1462	10.8365	9.92052	10.3922	10.2719	10.7472	10.8477	10.8881	10.5938	10.6861	10.5581
A_55_P2055419	7.6623	8.46101	8.17737	8.28978	8.39701	7.80702	7.93609	8.18038	7.7695	8.01606	8.13544	8.23337
A_30_P01022480	3.58124	2.99819	3.50652	3.00569	4.19232	2.12599	2.96777	4.20867	3.50652	3.46357	5.54787	3.57873
A_55_P1987064	3.03532	3.26528	4.01405	3.5118	4.01405	2.43473	2.96777	3.14131	2.96007	3.46357	3.83187	5.36888
A_55_P2149382	6.00633	6.03778	6.04144	6.1855	6.00071	6.29902	6.01937	6.70607	6.17556	6.07749	6.32024	5.96844
A_30_P01019077	4.38013	4.45877	4.13873	3.16161	4.57682	4.35977	4.12845	4.73416	3.80632	4.40304	4.93026	4.88419
A_30_P01032336	5.27885	5.26953	5.67332	4.74092	5.81566	5.29118	4.86781	6.6916	5.34542	5.42173	4.91041	5.77012
A_51_P129100	7.90395	7.75982	7.88564	7.477	7.76065	7.87492	7.48642	8.12601	7.98199	7.72757	7.95874	7.85403
A_55_P1958103	14.532	14.4959	14.3944	14.5166	14.4759	14.2358	14.2847	14.5697	14.3702	14.3034	14.2712	14.4339
A_30_P01019598	6.89722	7.04747	7.08868	6.85734	7.32033	7.35306	6.8687	7.30559	7.20407	7.13987	7.00458	7.22872
A_30_P01018965	2.85182	2.4458	3.87348	3.5118	4.53075	2.66067	1.83762	4.40019	2.65113	3.16161	3.56356	3.69932
A_51_P141071	7.28338	7.5326	6.72835	6.85734	6.9463	6.83065	7.22189	7.46701	7.04041	7.19137	7.20407	7.0511
A_66_P117450	3.70394	-0.170805	3.97827	3.26528	4.19232	2.27002	3.44713	4.52293	3.36199	3.83187	3.37943	3.5118
A_51_P261569	3.92584	3.26528	3.87348	4.04716	4.73867	3.14131	3.57873	4.52293	3.44161	3.83187	4.77645	3.87348
A_30_P01023352	2.95232	1.31303	5.67332	2.37803	4.26915	3.20788	3.57873	4.7091	3.2962	3.46357	4.69293	4.11811
A_52_P169595	3.58124	2.69821	4.51769	2.19325	4.05441	2.66067	2.75274	4.13873	2.49994	3.71772	3.87758	4.02517
A_55_P1971398	4.30305	2.91296	3.92584	3.26528	4.19232	3.36199	4.38876	3.26528	3.90993	4.12156	4.31518	4.11811
A_51_P475138	4.55397	3.55846	4.75658	3.87758	4.58936	4.91041	4.3	5.00517	5.04759	5.25544	6.1057	4.93813
A_66_P108178	8.85905	8.68603	9.02361	8.83437	8.85224	9.02095	8.74802	9.12942	9.20169	8.987	9.08777	9.08118
A_51_P462102	9.7198	10.1027	9.74061	9.70302	9.89341	9.85323	9.71752	9.84417	9.75055	9.80475	9.68469	9.74971
A_52_P282905	3.58124	3.77592	4.22162	2.82238	4.26915	2.27002	3.14131	3.98017	3.57873	3.46357	5.98466	4.52293
A_52_P581326	6.48835	6.48701	6.36104	6.28522	6.67287	6.46404	6.1453	6.62769	6.36687	6.52732	6.39071	6.44139
A_55_P2081020	5.4982	6.2406	5.7909	5.60085	5.69321	6.07749	5.35279	6.18963	5.91962	6.23423	6.17971	5.81459
A_51_P137168	9.23967	9.11621	8.97618	9.12754	9.02719	8.8525	9.13103	9.15384	9.05864	8.99938	9.14792	8.93132
A_30_P01018931	7.32296	7.8415	7.67647	7.7892	7.87594	7.41706	8.10782	7.99453	6.72835	7.66911	7.38901	7.97077
A_51_P108334	14.8689	14.9511	14.7082	14.7924	14.7721	14.8767	14.9394	14.8283	14.6587	14.8886	14.9511	14.8767
ERCC-00109_120	4.45877	4.16577	4.57934	4.04716	5.12543	4.49388	3.87758	5.04941	4.59931	3.46357	5.00517	4.40304
A_55_P2066737	4.79172	4.16577	4.77645	4.20215	5.04578	4.31518	4.4615	4.90038	4.53853	4.8387	5.32607	4.7091
ERCC-00120_69	4.02886	3.16161	4.51769	3.57873	4.4478	3.83187	3.14131	4.52293	3.44161	3.77153	4.75658	4.99578
A_66_P125209	3.77153	3.98398	4.57934	3.45811	5.12543	4.28002	3.44713	4.65525	4.13531	3.71772	4.84708	4.20541
A_51_P253207	3.87758	3.10684	4.10768	3.68537	3.65229	3.72228	2.19325	5.13572	1.38224	2.81386	5.19272	4.11811
A_30_P01023061	3.70394	2.4458	4.13873	3.87758	4.01405	2.55212	3.2962	4.59931	3.84866	2.27002	4.42838	3.92584
A_55_P1975385	13.1298	13.1912	12.7245	13.0297	13.0344	12.9232	12.8585	13.1778	13.1559	13.1858	13.1765	13.1485
A_30_P01021748	4.21516	3.55846	4.75658	3.45811	5.42032	3.59872	3.2962	5.09409	4.3	3.59375	5.35866	4.65287
A_30_P01028040	9.66513	9.74534	9.14389	9.58487	9.81773	9.04163	9.15743	9.70389	9.43409	9.69652	9.6274	9.77895
A_30_P01019706	3.51706	2.99819	3.87348	4.38876	4.01405	3.92979	3.69932	4.52293	4.01033	3.16161	5.13743	3.6427
A_55_P2378129	3.8234	3.98398	4.22162	3.95326	4.53075	3.92979	4.12845	4.73416	4.33616	4.3272	4.51243	4.11811
A_66_P104814	5.61073	5.71511	5.95299	5.9559	5.80387	5.79199	5.56828	5.76128	5.88036	5.58215	5.88036	5.88036
A_65_P14622	3.65229	4.20541	4.57934	3.78903	4.10768	3.83187	2.96777	4.40019	4.10069	4.29081	4.93026	4.02517
A_52_P61520	3.92584	3.55846	4.45055	2.37803	4.85955	3.36199	4.17246	5.13572	4.18903	4.29081	4.66476	5.17785
A_55_P2037162	6.38856	6.69393	6.79996	6.59914	7.00598	6.38209	6.70376	7.06553	6.6413	6.85318	6.81952	7.12574
A_30_P01024721	6.51817	6.90752	6.81899	6.98857	6.99306	6.42959	6.90225	7.14413	6.50035	7.18395	6.8815	7.3958
ERCC-00073_60	3.36783	4.16577	3.87348	3.32048	4.95179	2.75274	3.14131	5.84837	3.57873	3.98398	4.47238	4.02517
A_51_P396917	9.98923	9.82368	9.76769	9.79203	9.78148	9.91231	9.93601	10.0676	9.94616	9.88346	9.93736	9.91677
A_55_P1956832	2.19325	3.55846	4.45055	2.63187	3.58375	2.12599	2.96777	4.04351	1.88705	3.26528	3.56356	4.65287
A_55_P1994388	9.50534	9.60935	9.55193	9.54981	9.60685	9.6723	9.22869	9.45291	9.58952	9.69652	9.54495	9.52965
A_52_P180826	10.5145	10.6599	10.6565	10.5736	10.592	10.6397	10.6303	10.5539	10.4566	10.6365	10.3051	10.467
A_30_P01029756	4.7091	4.42838	4.69988	5.36159	6.71353	4.80469	5.33354	5.28349	5.07282	5.32607	5.45088	5.54401
A_55_P2171993	6.97716	7.19384	7.2739	6.90877	7.29587	7.58442	7.1769	7.02549	6.99424	7.31676	7.32221	7.11992
A_55_P2424060	5.01078	5.49687	5.52716	5.1323	5.71854	5.19272	5.09761	5.58215	5.07282	5.3848	5.21231	5.29118
A_30_P01021083	3.70394	3.26528	4.37724	3.87758	4.01405	3.36199	3.57873	4.20867	4.22162	3.59375	4.96916	4.37434
A_30_P01030360	4.3421	4.95567	5.1323	4.38876	5.30949	3.83187	4.38876	4.7588	4.47238	4.81327	4.84708	5.20418
A_55_P2139889	6.17056	5.92951	6.59044	5.42453	6.13807	6.5073	5.99507	6.0899	6.41698	5.87729	6.503	6.2975
A_66_P135804	12.6051	12.7063	12.6389	12.7395	12.6549	12.4905	12.4286	12.5588	12.6339	12.7017	12.5399	12.781
A_55_P2002743	3.98398	4.20541	4.85541	4.20215	4.7068	4.24399	4.12845	4.40019	4.10069	4.20541	4.75658	4.3272
A_51_P109835	12.6761	13.1298	13.5114	13.1122	12.79	13.6217	13.4463	13.1178	12.9026	13.2483	12.8979	12.8642
A_30_P01025358	3.70394	3.41368	4.13873	3.78903	4.81327	3.14131	3.7627	3.85283	3.90993	3.46357	3.32048	3.87348
A_51_P249867	8.20758	8.60637	8.14588	8.50635	8.52646	8.27365	8.00112	8.56332	8.27326	8.67386	8.37518	8.67217
ERCC-00168_248	4.02886	2.69821	4.51769	3.92584	4.26915	4.20215	3.8234	4.52293	3.74935	3.46357	5.45088	3.81489
A_55_P2067321	4.12845	3.26528	4.40871	4.12845	4.10768	3.72228	3.87758	4.01405	3.84866	4.25033	4.59683	4.37434
A_30_P01023722	4.30305	3.98398	4.88419	4.91838	5.60827	4.93223	4.83975	4.6836	4.94595	4.96147	4.69293	5.52716
A_55_P2178803	9.54615	9.94244	9.78496	9.8772	10.0345	9.42843	9.58635	9.62972	9.61745	9.90189	9.80851	9.85596
A_52_P683336	3.70394	3.77592	4.45055	3.68537	5.63512	3.72228	3.87758	4.6836	4.96339	4.02886	5.92061	4.80469
A_55_P2143025	11.134	11.353	10.7665	11.1476	11.0561	10.7805	10.6925	11.0352	11.0166	11.0648	11.1659	11.2542
A_55_P2015832	3.8234	4.07596	4.37724	4.12845	4.40588	4.35977	4.02886	4.28466	4.33616	3.98398	4.73867	4.37434
A_55_P2092310	10.4735	10.5248	10.8186	10.9794	10.8073	10.1469	10.0557	10.6602	10.4455	10.5796	10.2612	11.0329
A_30_P01022686	6.93995	7.5326	7.10624	7.32858	7.53682	6.80508	7.02503	7.3764	7.19998	7.37169	6.88659	7.34753
A_55_P2224830	7.51167	7.33604	7.23392	7.74757	7.91196	7.77719	7.50689	7.52838	7.4109	7.45798	7.63413	8.04661
A_55_P2031596	2.71203	2.91296	3.63787	3.92584	4.6239	3.47443	3.2962	3.72683	2.96007	3.67129	4.7091	3.75826
A_30_P01018995	4.76102	3.41368	4.45055	4.3272	5.30949	4.07596	4.66476	4.65525	4.18903	4.3272	5.83895	4.4478
A_51_P111462	9.33811	9.3336	8.8395	9.23838	9.35918	9.35803	9.10904	9.16436	9.16912	9.30204	9.07773	9.18908
A_55_P2039681	3.98398	3.10684	4.05441	3.16161	4.26915	4.07596	4.02886	4.31215	3.20788	4.07596	4.52554	4.29081
A_55_P2062632	9.7589	9.79026	10.2015	10.586	10.8399	9.57521	10.1837	10.0086	9.71794	10.3157	9.62318	10.6136
ERCC-00116_142	3.58124	3.55846	3.75826	3.95326	4.53075	4.02886	3.98398	4.18903	3.69469	3.46357	4.2629	4.47778
A_55_P1968774	7.43402	7.78756	8.14758	8.52238	8.44601	7.56312	8.23656	7.93682	7.42513	8.28507	7.27254	8.37699
A_55_P1984481	9.62767	9.74356	9.84822	9.96107	9.81907	9.94592	10.1372	9.73867	9.64008	9.9825	9.58846	9.81623
A_55_P2444515	9.26119	9.11192	8.92305	9.33374	9.17318	9.15152	8.91298	9.09833	9.08329	9.27086	9.3349	9.39091
A_66_P111430	9.26251	9.26246	8.95731	9.40742	9.41272	8.77613	8.85412	9.43938	9.17573	9.11556	9.25309	9.30751
A_52_P373666	4.76102	4.58686	4.69988	4.38876	4.78738	4.77645	4.59931	4.82392	4.77645	4.51507	5.16115	4.76544
A_30_P01026733	6.80508	7.30654	7.44528	7.2399	7.35379	7.24941	7.23112	7.24109	7.33939	7.29261	6.69625	7.06957
A_52_P258338	5.52716	5.51012	5.57587	5.56828	5.85566	5.60085	5.58215	5.35132	5.52586	5.53496	4.93026	6.00446
A_55_P2040810	4.21516	3.98398	5.19436	3.68537	4.53075	4.02886	4.17246	3.98017	3.90993	4.12156	3.16161	3.87348
A_51_P487933	11.041	11.3243	11.2106	11.2402	11.3995	10.9844	11.0581	11.2049	11.1578	11.3992	11.1042	11.5149
A_51_P134923	4.86781	4.86162	4.95567	4.91838	5.2742	4.38876	5.09761	4.78302	4.53853	4.3272	4.52554	5.30797
A_52_P98232	7.54489	7.94099	7.79422	7.66734	7.89387	7.73125	7.77252	7.96897	7.70326	7.99382	7.81398	8.18338
A_55_P1971679	4.48585	4.42838	5.0033	4.04716	4.10768	4.49388	4.78302	4.73416	4.47238	4.53853	4.88622	4.52293
A_66_P108298	2.95232	3.71772	3.97827	3.16161	3.70394	3.44161	3.8234	5.57082	3.50652	3.67129	3.83187	3.69932
A_51_P440568	8.39665	8.56839	8.67268	8.51188	8.4794	8.55263	8.58555	8.69874	8.6214	8.60698	8.31501	8.54862
A_51_P496845	11.0204	10.9211	10.9573	11.0112	11.1265	10.8675	10.7601	10.8802	10.8677	11.0629	10.8188	11.0846
A_55_P2071536	6.80508	6.72608	7.1403	7.12574	6.77301	6.93456	6.88354	6.5716	6.85318	6.86458	6.58981	6.81205
A_55_P2120254	11.5228	11.5732	11.6032	11.8162	11.6844	11.6047	11.5552	11.5597	11.5862	11.7352	11.4116	11.7118
A_55_P2036417	4.12845	4.67421	4.51769	4.04716	4.88419	4.02886	4.02886	4.57934	4.53853	4.64087	4.52554	4.37434
A_30_P01025334	3.92584	2.69821	3.81489	3.32048	4.10768	2.12599	3.8234	5.24596	4.2629	3.16161	4.06522	4.3272
ERCC-00075_180	4.12845	3.41368	3.57873	3.78903	4.26915	3.36199	3.92584	5.28349	3.44161	3.59375	3.56356	4.11811
A_55_P1958804	4.02886	4.02886	4.05441	3.87758	4.33913	4.02886	3.92584	6.03045	3.50652	3.46357	4.7091	4.11811
A_51_P255304	10.0365	10.0787	9.37999	9.96571	10.4675	9.97712	9.62436	10.0328	9.9256	10.2074	9.95938	10.2524
A_52_P136138	5.33354	5.553	5.57587	5.32157	5.09761	5.13401	5.04941	5.03298	5.0888	4.70219	5.97705	5.58215
A_30_P01029361	2.19325	2.18004	3.36783	3.00569	3.58375	2.66067	3.57873	4.43117	3.44161	3.16161	5.50284	3.57873
A_51_P184321	11.0311	11.2752	11.0286	11.0574	10.945	10.978	10.7803	11.1675	11.0501	10.9631	10.8193	10.9396
A_30_P01031250	3.58124	3.83187	4.69988	3.95326	4.47238	3.68069	4.21516	4.92037	4.40588	4.3272	4.2629	4.88419
A_52_P383653	7.10318	7.11016	7.31204	6.48029	7.01809	7.2399	7.1889	7.20407	7.05065	6.9966	7.14222	7.48088
A_66_P121924	3.14131	4.16577	3.92584	3.32048	3.65229	3.2962	3.36783	4.3421	3.94937	3.46357	3.92188	5.74232
A_52_P545831	6.92321	7.11016	6.9824	6.78804	6.71353	7.47869	7.24684	7.53973	7.29606	6.88456	6.81151	6.90877
A_55_P2015410	12.4847	12.3995	12.355	12.2153	12.2182	12.3879	12.2587	12.3553	12.2719	12.186	12.1544	12.1605
A_55_P2112235	5.95493	6.37378	6.00071	6.06318	6.00071	5.38047	5.94326	6.28599	5.76902	5.70938	5.61196	5.94326
A_51_P115178	10.3514	10.6132	10.425	10.2113	10.2553	10.2875	10.2393	10.7142	10.4729	10.5722	10.6665	10.5655
A_51_P313761	8.70545	8.85607	8.86905	8.74599	8.69585	8.5967	8.73319	8.98071	8.64495	8.76712	8.85763	8.81562
A_30_P01022341	4.7091	5.16283	5.0033	4.94595	5.54787	5.07282	4.66476	5.13572	5.22522	5.25544	4.81967	5.0888
A_30_P01028502	2.95232	3.92979	3.87348	3.5118	3.44713	3.14131	2.85598	4.31215	3.20788	3.59375	5.24596	4.29081
A_51_P302139	4.7091	4.55653	4.80684	3.63304	4.47238	4.35977	4.7251	4.73416	4.13531	4.51507	4.80469	4.29081
A_55_P2115832	4.18242	3.55846	3.44161	3.57873	5.09761	3.47443	3.14131	4.20867	3.57873	4.81327	4.31518	5.90464
A_30_P01027171	3.8234	4.24716	4.30305	3.95326	4.7068	3.68069	3.2962	3.85283	2.96007	4.29081	4.75658	3.2962
A_30_P01025577	5.76128	5.09761	5.15272	5.03665	5.57587	5.70938	5.23164	5.95493	5.55044	5.81779	5.74007	6.17056
A_51_P115626	6.31346	6.91027	7.17295	6.3074	7.10275	7.43802	6.72039	7.2506	7.24941	7.00294	7.2237	7.01484
A_55_P2045380	5.56702	5.74007	5.54014	5.08438	5.77342	5.79199	4.96916	5.69321	5.71282	5.39911	6.21897	6.1118
A_55_P2116310	4.42279	4.02886	4.40871	3.82764	4.47238	3.47443	3.14131	4.52293	4.13531	4.3272	4.52554	4.58686
A_55_P2005555	9.76223	10.0913	9.86704	9.77147	9.77092	9.51214	9.95848	9.95406	9.6914	9.6855	9.82561	9.84089
A_55_P1981739	7.17732	6.98098	7.30236	6.64191	7.00036	7.26474	6.97812	7.20407	7.4901	7.32896	7.35122	6.84641
A_55_P2021953	5.05485	4.78302	5.25701	4.63846	5.32757	4.35977	4.66476	5.03298	4.47238	5.32607	4.47238	4.93813
A_55_P2227178	3.92584	4.16577	5.65911	3.78903	4.10768	3.36199	3.44713	6.6916	2.40098	3.83187	5.12887	3.2962
A_55_P1989956	5.4632	5.37179	4.95567	4.63846	5.20255	5.03298	4.4615	5.82417	5.43568	5.29118	5.76571	5.29118
A_30_P01031167	6.13079	6.2406	6.32024	5.70363	6.32325	6.53122	6.01937	6.62769	6.26034	6.36542	6.53252	6.44933
A_30_P01028969	3.92584	3.10684	4.45055	3.00569	3.92188	3.36199	3.2962	4.13873	3.69469	3.71772	4.64568	3.81489
A_51_P372172	10.5602	10.728	10.4137	10.3836	10.5736	10.5618	10.4471	10.8576	10.7796	10.6186	10.7233	10.7208
A_55_P2048980	3.2962	3.26528	3.36783	3.39094	3.65229	3.36199	1.37096	4.28466	3.80632	2.81386	4.31518	3.6427
A_55_P2024327	10.9672	11.0242	11.0987	10.3346	10.4864	11.2543	10.7926	10.8968	10.8611	10.6679	10.8242	10.3542
A_55_P2159299	9.32425	9.36064	9.10424	9.04482	9.28745	9.21914	9.07467	9.32687	9.28055	9.05684	9.42973	9.20806
A_52_P533198	7.87056	8.3937	8.31113	8.17134	8.26781	7.71875	8.09721	8.02405	7.63232	7.91657	7.86425	8.17623
A_30_P01017767	4.21516	3.83187	3.20788	4.26915	4.33913	3.14131	3.69932	3.85283	2.11215	3.92979	4.34506	3.87348
A_55_P2132697	7.83783	8.04377	8.02462	7.66734	7.8721	7.53065	7.72927	8.13779	7.90357	7.75176	8.06839	8.02578
A_55_P2103452	11.2358	11.3743	10.9387	11.0749	11.4761	10.5777	11.0177	11.4839	11.7078	11.7923	11.9576	11.6609
A_30_P01033218	4.92037	4.61902	4.75658	4.26915	5.13743	4.15906	4.78302	5.00517	4.75212	5.07639	4.93026	5.35132
A_55_P2100065	6.8687	6.56527	7.23392	6.87997	7.54489	7.14243	7.24684	6.77356	7.06733	6.90977	6.84641	6.73175
A_30_P01030585	5.20418	5.28965	5.29731	4.12845	6.0286	5.13401	5.00142	5.28349	5.11159	5.5934	6.26894	5.63512
A_55_P2217598	3.70394	2.91296	4.10768	0.925984	4.37724	3.36199	3.63787	3.77153	4.40588	3.59375	3.59375	4.11811
A_30_P01021300	4.67891	3.98398	4.45055	4.63846	4.76102	4.35977	4.3	4.82392	4.10069	4.25033	4.34506	3.57873
A_51_P198411	10.6987	10.6299	10.3482	10.383	10.5345	10.5054	10.3369	10.5539	10.5914	10.1933	10.7109	10.4122
A_55_P2053372	3.70394	3.67129	3.50652	2.91296	3.14131	3.72228	3.14131	4.07952	3.80632	4.25033	3.99155	3.81489
A_51_P129317	9.88482	10.0411	10.0556	10.036	10.0714	10.2005	10.0282	10.0471	10.1117	10.0292	10.2167	10.0051
A_66_P101835	7.61356	7.04747	7.66793	6.95892	7.08271	7.61003	7.4901	7.59238	7.44975	7.03881	6.8537	6.90877
A_30_P01026223	3.03532	3.59375	3.50652	3.00569	4.30305	2.75274	1.83762	4.4615	3.44161	2.43473	4.7091	4.7091
A_30_P01022804	7.95849	7.78239	8.20778	8.38312	8.42132	7.78838	7.92215	7.91233	7.74196	8.50412	7.95874	8.32919
A_55_P2113758	4.76102	5.16283	4.91041	3.72683	4.47238	4.49388	4.02886	4.92037	4.66239	4.40304	4.52554	4.65287
A_52_P424767	6.89722	7.15556	6.76031	6.52275	6.82695	7.01437	6.59293	6.994	6.8687	6.74105	7.18808	6.74077
A_66_P107174	7.89096	8.31132	8.51188	8.38312	8.29926	8.31642	8.52091	7.85714	7.54456	8.48604	7.88614	8.1906
A_55_P2046910	4.86781	5.04578	5.42453	4.6906	7.14774	4.85541	4.9479	5.04941	5.04759	4.12156	5.0888	5.22522
A_55_P1997145	7.07715	7.53633	7.74463	7.40435	7.28685	7.68643	7.6232	7.64183	7.14922	7.51808	7.28839	7.49877
ERCC-00013_180	3.70394	2.69821	4.5437	3.92584	3.92188	4.07596	3.14131	5.3848	4.18903	4.57682	3.75381	3.81489
A_55_P2168321	6.67346	6.65449	7.10143	6.27671	6.61395	6.7675	6.38641	6.90426	6.70319	6.52732	7.00458	6.62739
A_30_P01031758	4.52554	4.75658	4.85541	4.20215	4.58936	3.78903	4.38876	4.28466	4.01033	4.78955	4.47238	4.7091
A_30_P01030078	5.42732	5.70247	6.27826	6.49102	6.50035	5.85046	5.91862	5.57082	5.55044	6.66074	5.78873	5.8515
A_30_P01031590	4.3421	3.55846	4.63846	3.87758	4.73867	2.12599	3.98398	3.58375	3.57873	4.12156	5.26172	4.11811
A_55_P2054097	3.8234	3.41368	5.1323	2.47853	4.33913	4.11811	2.85598	5.31554	3.90993	3.83187	4.31518	3.92584
A_55_P2013499	3.58124	3.98398	4.5437	4.22483	3.961	3.72228	3.69932	6.61456	4.04716	4.70219	5.85046	3.81489
A_30_P01031900	3.8234	2.18004	4.6092	3.45811	3.58375	3.59872	2.75274	3.72683	3.03532	2.27002	4.37724	3.57873
A_30_P01033650	5.33354	6.05597	6.66341	5.26015	6.26034	5.95493	5.35279	5.88698	6.08637	5.7646	6.21897	5.54401
A_30_P01028712	3.92584	3.41368	4.95567	5.00984	5.08704	4.11811	4.02886	5.54014	4.72055	4.64087	6.73118	4.7091
A_55_P1970693	4.12845	3.26528	4.05441	2.82238	4.10768	3.06436	2.96777	4.4615	3.44161	3.16161	5.32607	4.29081
A_30_P01032260	4.3421	4.02886	3.63787	4.38876	4.58936	4.4615	2.48927	4.18903	4.66239	3.83187	4.52554	6.26738
A_30_P01027750	3.70394	3.77592	3.81489	3.57873	4.6239	3.36199	3.7627	4.11811	2.96007	3.98398	3.7977	4.4478
(+)E1A_r60_a107	5.63875	4.80684	5.52716	5.21878	5.20255	5.30797	5.33354	5.57082	4.94595	5.26953	5.29425	5.41046
A_51_P118763	8.38258	8.58273	8.38663	8.17924	8.42692	8.5676	8.18141	8.64051	8.48319	8.48193	8.75763	8.61006
A_51_P378576	4.30305	3.46357	5.54014	3.78903	4.26915	3.47443	3.8234	5.36743	3.94937	3.71772	5.71282	4.68477
A_30_P01021682	3.2962	3.41368	4.30305	3.16161	4.53075	3.47443	2.85598	5.90765	2.96007	3.46357	4.77645	3.92584
A_30_P01033450	1.7864	2.18004	3.2962	-0.170805	3.44713	-0.552514	2.19325	5.24596	0.81172	2.58254	3.32048	3.81489
A_55_P2142695	3.70394	3.59375	3.97827	3.95326	4.7068	3.20788	3.2962	4.6836	3.69469	3.87758	4.75658	4.16242
A_55_P2253279	3.70394	3.10684	4.22162	3.00569	4.40588	2.86426	2.96777	3.98017	3.2962	3.26528	5.04759	3.04991
A_30_P01022605	3.2962	3.88166	4.01405	3.45811	3.65229	4.65525	3.57873	4.57934	4.40588	2.27002	3.49056	3.98017
A_30_P01032129	4.18242	3.67129	4.51769	3.57873	4.22162	3.59872	4.02886	5.09409	3.69469	3.32048	3.70394	4.37434
A_66_P107256	4.38013	3.26528	4.45055	4.20215	4.01405	3.83187	3.98398	4.4615	4.13531	4.16577	3.99155	4.20541
A_52_P502849	5.29884	6.31005	5.1323	4.52031	5.2742	3.36199	6.96085	5.28349	4.66239	6.34929	5.71282	6.67582
A_30_P01030287	6.55699	6.55507	6.85526	6.94971	7.14774	6.62739	6.64161	6.79969	6.30588	6.99282	6.70319	6.97573
A_55_P2156370	5.09761	3.41368	6.51291	4.99201	5.88036	4.91041	4.83975	5.35132	4.47238	5.00517	5.7974	5.17785
A_30_P01025804	4.02886	2.4458	4.22162	3.26528	4.05441	3.78903	3.04991	3.72683	4.10069	3.87758	3.02058	3.92584
A_51_P209518	9.00068	9.1724	9.13022	9.13995	9.36757	8.82943	9.24711	9.19566	8.91448	9.07121	9.1299	9.20668
A_51_P353592	9.98411	10.1623	10.3386	9.95703	9.93352	10.4222	10.3754	10.2295	10.0906	10.1595	10.2128	9.97273
A_30_P01030147	6.20763	6.57916	6.7357	6.68373	6.5659	6.28676	6.4445	6.5716	6.35921	6.45858	6.69625	6.97573
A_55_P2183940	4.84289	4.38876	5.06835	4.57682	5.12543	4.31518	4.59931	4.78302	4.92037	4.98538	6.00633	4.93813
ETG08_142674	4.52554	3.88166	4.05441	4.3272	4.58936	3.20788	3.69932	4.4615	3.50652	4.12156	5.78873	4.37434
A_30_P01027500	3.8234	4.55653	4.13873	4.38876	4.99578	4.31518	3.44713	4.4615	3.80632	4.16577	5.21231	4.29081
A_55_P2044627	7.01437	6.98098	7.13047	6.83934	7.92994	7.35306	6.78287	7.00598	7.06733	6.67405	7.11233	7.18973
A_30_P01024111	3.70394	2.91296	4.5437	4.22483	4.05441	3.47443	4.4615	4.20867	4.18903	3.32048	5.91165	3.57873
A_55_P1958961	8.12029	8.3045	8.04229	8.0723	8.1984	7.45832	8.12676	8.53799	7.87261	8.24392	8.11629	8.28824
A_52_P668478	5.9894	6.31005	6.35076	6.13678	6.74358	6.56018	6.19702	6.61456	6.36687	6.43028	6.26894	6.6916
A_55_P2098609	4.3421	3.98398	4.45055	4.26915	4.64808	4.56671	3.92584	4.59931	4.2629	3.67129	5.7042	4.40304
A_55_P2076861	4.86781	4.97491	6.18468	4.60179	4.90239	4.65525	4.89635	4.94984	4.72055	5.36378	5.53237	4.82604
A_30_P01032677	4.52554	4.24716	4.51769	4.12845	4.33913	4.31518	4.4615	5.3848	3.74935	4.4478	5.37324	4.88419
A_30_P01025386	5.29884	5.39911	5.71854	5.88748	6.38281	5.29118	5.00142	5.52716	4.92037	5.48886	5.42173	5.61564
A_51_P101075	12.1457	11.974	12.0668	12.042	12.1503	12.2777	11.8805	11.9304	12.1784	12.0193	12.0831	12.1273
A_51_P102518	3.70394	3.92979	4.30305	4.76544	4.58936	4.31518	4.21516	4.63362	3.90993	4.20541	4.12845	4.58686
A_55_P2058557	5.78655	5.62785	5.81886	5.7646	5.81566	5.58341	5.31403	5.95493	5.80602	5.66623	6.51685	5.97991
A_55_P2068096	7.54134	7.44217	8.84441	7.7892	7.19548	8.43632	8.47907	7.40647	7.55994	7.53325	7.67471	6.82695
A_55_P2007510	11.9211	11.8319	11.8481	11.808	11.8449	11.9748	11.8135	11.7832	11.9851	11.8268	11.814	11.8334
A_55_P2101431	7.43402	7.50474	7.51726	7.43905	7.44217	7.56915	7.1769	7.82304	7.61003	7.32896	7.52512	7.55499
A_51_P113205	3.20788	1.31303	3.50652	3.68537	3.51706	2.86426	3.57873	4.20867	3.80632	2.58254	3.49056	3.87348
A_51_P211765	5.71854	5.71511	5.7909	5.92951	6.07482	5.99883	6.1855	6.59106	6.54738	6.4	6.85837	6.67582
A_55_P2105878	6.20763	5.76571	6.4219	6.31911	5.95493	6.6711	6.00446	5.97418	5.80602	5.72082	5.58716	5.58215
A_55_P1955847	3.2962	3.67129	4.05441	2.08408	3.2962	3.20788	3.14131	4.7588	4.18903	3.71772	4.31518	3.92584
A_55_P2012702	3.58124	4.16577	4.05441	3.5118	3.8234	3.72228	3.92584	5.15778	3.2962	4.3272	4.34506	3.75826
A_30_P01022291	2.95232	2.18004	3.63787	3.16161	4.37724	3.06436	3.2962	3.26528	3.20788	3.59375	3.83187	4.11811
A_30_P01023888	12.376	12.6858	12.7255	12.8938	12.9496	12.32	12.5012	12.6426	12.1013	12.4441	12.4779	12.7832
A_55_P2120897	4.64568	3.98398	4.22162	4.60179	4.78738	3.47443	4.3	5.04941	4.22162	4.64087	5.22683	5.35132
A_55_P2122619	5.4632	4.3212	4.75658	4.26915	6.11353	3.92979	5.91862	6.74862	5.00517	5.00517	5.60085	5.17785
A_55_P1953663	3.44713	3.67129	3.87348	3.5118	4.47238	3.06436	3.44713	4.31215	3.14131	3.46357	4.55141	3.75826
A_55_P1983553	3.44713	3.88166	4.05441	2.82238	3.8234	4.02886	4.17246	4.13873	3.36199	4.12156	4.2629	4.40304
A_55_P2007464	15.8865	16.0739	15.7975	16.1064	16.081	15.8635	15.7975	16.0448	15.8998	16.035	15.8307	16.1529
A_30_P01020897	4.08307	3.26528	4.22162	3.78903	5.21878	3.72228	3.98398	4.11811	4.18903	3.83187	4.84708	4.29081
A_55_P2151672	8.95792	9.18552	9.1014	9.10107	9.02719	9.21475	9.15384	9.16692	8.37834	9.15911	8.52483	9.14914
A_30_P01024612	4.30305	4.3212	4.10768	4.3272	4.85955	2.96777	3.14131	4.04351	3.90993	4.51507	4.77645	5.06206
A_30_P01020457	5.29884	5.23483	5.63875	6.13678	5.97848	5.46592	5.42872	5.76128	4.59931	5.7909	5.16115	5.90464
A_52_P622230	5.71854	5.553	6.02768	5.3848	5.51538	6.25955	6.05144	5.40054	5.80602	5.21555	5.90264	5.20418
A_55_P2236622	6.19784	6.41698	6.44209	6.4	7.03377	6.10133	6.24932	6.65985	6.33596	6.63467	6.53252	6.4
A_66_P139497	3.44713	3.77592	3.87348	3.63304	4.53075	3.20788	4.02886	4.4615	2.24488	3.46357	2.85598	3.69932
A_55_P1952212	3.98398	3.71772	5.27885	4.3272	4.88419	3.92979	4.63846	4.85541	4.33616	3.83187	4.52554	4.7091
A_52_P154858	3.70394	2.91296	4.30305	3.26528	4.13531	3.83187	3.57873	3.92979	3.44161	3.59375	4.57682	4.02517
A_30_P01026678	3.77153	2.69821	5.04759	3.68537	3.70394	3.92979	2.96777	3.85283	3.36199	3.67129	4.34506	2.96007
(+)E1A_r60_a135	7.3143	7.35343	8.12364	7.94294	7.92994	7.04633	7.83651	7.1583	7.10318	7.52609	7.28839	7.87594
A_55_P1963758	4.26915	4.07596	4.91041	3.87758	4.30305	4.07596	3.57873	3.98017	3.80632	3.67129	4.7091	3.92584
A_55_P2022187	5.36743	5.58215	5.54014	5.8421	6.0286	5.17119	5.42872	5.90765	5.55044	5.77781	5.7535	5.8515
A_55_P1967855	9.16724	9.08168	9.43252	9.27513	9.49258	9.66957	9.1351	9.27494	9.52183	9.52542	9.38485	9.43104
A_55_P2009064	11.6247	11.6006	11.7315	11.7135	11.6787	11.6627	11.586	11.6588	11.6296	11.8088	11.5894	11.7354
A_52_P413394	3.65229	4.24716	4.37724	3.45811	4.67891	3.20788	2.38955	4.07952	4.2629	4.02886	4.16577	3.98017
A_52_P574190	12.0458	12.0169	12.2897	12.1902	12.062	12.2911	12.1983	12.0382	12.2506	12.2232	12.0664	12.1662
A_30_P01032179	4.42279	3.77592	4.22162	4.22483	4.40588	4.42838	4.59931	4.92037	4.47238	4.51507	4.06522	4.29081
A_55_P1982454	7.5902	7.12574	7.46718	6.97382	7.53682	7.48441	7.61984	7.31317	7.55227	7.57641	7.35893	7.6857
A_30_P01017856	4.12845	3.98398	4.45055	4.38876	4.19232	4.11811	4.3	4.4615	4.10069	3.92979	3.83187	4.40304
A_30_P01018682	5.39769	5.66623	5.50549	6.20926	6.30131	5.19272	5.44537	5.71854	5.4048	5.62541	5.83895	6.12391
A_55_P1954608	4.96724	5.28965	5.0033	4.74092	5.36597	4.97873	4.96916	5.24596	5.24438	5.49953	5.26172	4.82604
A_30_P01026564	4.64568	4.24716	3.97827	4.16242	4.40588	3.92979	4.12845	4.13873	4.33616	4.3272	5.12887	4.65287
A_55_P2120080	7.76757	7.78239	7.88156	8.04252	7.82091	7.27331	7.43905	7.64183	7.31845	7.79652	8.08564	7.94148
A_51_P511375	9.4785	9.55601	9.4641	9.34298	9.73272	9.51379	9.10904	9.30964	9.60608	9.87749	9.73568	9.8264
A_51_P163354	4.38013	3.98398	4.22162	3.57873	4.93026	4.56671	4.66476	4.20867	4.51243	4.29081	4.42838	3.92584
A_66_P102395	7.58175	7.62792	8.13544	7.76563	7.86477	8.00662	8.0135	7.75982	7.7601	7.84999	7.63413	7.5877
A_55_P2036377	14.6003	14.5931	14.2273	14.5841	14.7054	14.3204	14.2074	14.5651	14.5651	14.5454	14.3718	14.7778
A_55_P1992640	8.05093	7.83045	7.9539	7.99842	7.8415	7.94612	7.73436	7.75287	7.98697	7.96187	7.85455	7.76328
A_30_P01026851	4.38013	3.77592	4.45055	4.42559	4.53075	3.56356	4.57682	4.57934	4.22162	4.20541	4.75658	4.74541
A_55_P2060188	5.73557	5.44675	5.36743	5.60085	5.34837	5.86187	5.63512	5.47946	5.55044	5.32607	5.71282	5.90464
A_30_P01031852	4.73867	4.24716	4.75658	4.57682	4.95179	4.63241	4.9479	4.73416	4.47238	4.64087	4.45604	4.80469
A_52_P294514	2.71203	2.91296	3.87348	3.63304	3.58375	4.02886	3.44713	3.77153	3.94937	3.16161	4.31518	4.11811
A_55_P2143095	7.06149	7.06553	7.22872	7.04383	7.40541	7.15261	6.97812	7.23092	7.16522	7.13004	6.86767	7.2397
A_55_P2054225	5.44123	5.53885	6.19661	5.53237	5.71854	5.75907	5.74007	5.60085	5.71282	5.84628	5.34394	5.65076
A_55_P1988907	7.86412	7.94099	7.64469	7.92957	8.28458	7.80057	7.66497	7.90382	7.92784	7.99736	7.93756	8.05297
ERCC-00126_533	4.45877	4.38876	4.85541	4.12845	4.6239	4.35977	4.66476	4.4615	4.59931	4.64087	4.52554	4.99578
A_52_P512329	7.29721	7.43524	7.4086	8.18234	7.51431	7.38236	7.1889	7.58269	7.30995	7.62228	7.51726	7.65844
A_55_P2151762	6.45927	6.601	6.57476	6.503	6.65807	6.70319	6.7664	6.73486	6.90727	6.63467	6.62921	6.85422
A_51_P201904	10.0549	9.83801	10.462	10.3379	9.99969	10.554	10.6553	9.74517	9.70071	9.85212	9.48707	9.73653
A_55_P2022128	7.01693	6.9933	7.53309	6.8952	7.17024	7.40931	6.98715	7.27254	6.99424	7.10929	6.81151	6.7978
ERCC-00024_60	4.12845	4.24716	4.13873	4.22483	3.2962	3.06436	4.12845	4.28466	3.74935	3.92979	3.92188	4.25033
ERCC-00104_60	4.21516	3.16161	3.87348	2.82238	4.40588	3.06436	2.75274	3.63787	4.10069	2.99819	3.65706	3.69932
A_55_P2098578	7.35526	7.24387	7.32559	7.1889	7.28973	7.45832	7.02503	7.31845	7.35856	7.48943	7.31317	7.51447
A_30_P01017914	5.09761	4.95567	4.63846	5.77781	5.46592	5.21555	4.86781	5.98181	4.85541	5.17452	7.3177	5.4495
A_55_P2011341	6.74077	5.67861	6.69972	7.75982	6.0286	6.60718	7.22189	6.59976	5.53885	5.43568	5.83895	5.26797
A_65_P17476	4.48585	4.52554	5.43568	4.3272	4.64808	4.35977	4.21516	5.46592	4.51243	4.51507	4.47238	4.58686
A_30_P01022879	3.14131	3.83187	3.63787	3.82764	4.30305	3.59872	4.02886	5.73669	3.94937	4.02886	5.12887	4.3272
A_30_P01026702	4.45877	3.88166	3.63787	3.45811	4.30305	4.31518	3.92584	4.94984	3.74935	4.29081	5.4048	3.92584
A_55_P2091294	4.38013	4.48853	4.85541	4.12845	4.85955	4.58936	4.7251	4.40019	4.72055	3.98398	5.63754	4.55397
A_30_P01018417	3.44713	2.69821	4.63846	3.78903	4.64808	2.75274	3.69932	5.09409	4.2629	3.46357	4.7091	4.82604
A_55_P1959338	8.78133	9.03225	8.97975	8.93881	8.78331	8.97373	8.35218	8.89017	8.97229	8.94273	9.01097	8.74382
A_51_P147274	6.42749	5.87422	6.33223	5.00984	5.51538	5.71854	6.13251	6.2222	6.12477	5.95299	5.78873	6.03045
A_51_P367070	3.2962	2.80528	5.04759	4.04716	4.19232	3.92979	3.69932	5.78655	4.4478	3.71772	4.6239	4.40304
A_30_P01022616	4.30305	4.07596	3.44161	4.94595	3.8234	4.02886	4.21516	5.40054	3.57873	4.4478	5.57523	6.20274
A_30_P01026045	4.86781	4.75658	4.63846	4.45877	4.47238	4.85541	4.38876	6.4	4.82604	4.12156	5.26172	4.88419
A_55_P2086741	6.00633	6.14912	6.00071	6.03595	6.47287	6.29902	6.13251	6.48701	6.10744	5.69321	5.97705	5.61564
A_55_P2094104	4.67891	3.98398	4.75658	4.12845	5.57587	4.11811	4.38876	5.88698	4.90038	4.57682	4.22162	4.65287
A_55_P2014249	8.09446	7.88576	7.37405	7.70657	7.57971	7.09397	7.37893	7.84058	7.82304	7.83151	8.23497	7.97077
A_55_P2251082	7.38218	7.17024	7.48977	7.08293	6.72096	7.47125	7.31317	7.06912	7.24149	6.94874	7.10798	6.8815
A_55_P2466575	5.29884	5.39911	6.07749	5.73557	5.3848	5.46592	5.63512	5.6792	5.57838	5.42173	5.60085	4.99578
A_55_P1974317	8.38258	8.42683	8.0771	8.16234	8.24907	8.26557	8.06559	8.39977	8.58461	8.40155	8.70084	8.36692
A_55_P2091496	3.92584	3.55846	4.37724	4.57682	3.92188	3.72228	3.57873	4.87807	3.57873	4.20541	5.47676	3.87348
A_30_P01030821	2.95232	1.7864	3.92584	3.39094	4.30305	2.43473	3.7627	2.75274	3.44161	4.02886	4.16577	5.04578
A_55_P2126207	4.64568	4.83449	4.40871	4.38876	5.85566	4.35977	3.8234	4.3421	4.40588	5.1561	4.77645	4.85541
A_55_P1977558	5.04578	4.72283	5.33354	4.99201	5.21878	4.77645	4.9479	4.96532	4.75212	5.07639	5.61196	5.54401
A_30_P01024337	4.7091	3.98398	4.88419	4.20215	4.40588	4.11811	4.12845	5.13572	4.40588	4.70219	4.69293	4.93813
A_55_P2370931	4.08307	1.7864	4.34506	2.82238	5.54787	2.66067	2.38955	4.52293	3.57873	3.92979	3.56356	4.85541
A_55_P2070254	7.17732	7.00551	7.14689	6.84222	6.90827	6.79022	6.75085	7.11016	6.99424	6.99282	7.07715	7.47159
A_55_P2145800	7.13132	7.12035	7.48977	7.01437	7.26669	7.39973	7.03606	7.38685	7.30995	7.10929	7.31317	7.21584
A_55_P1995487	5.29884	4.64087	4.85541	4.38876	5.39911	4.97873	4.2629	4.43117	4.92037	4.60427	5.00517	4.7091
A_55_P2252891	5.222	5.4329	5.86187	5.1323	5.77342	5.25228	5.76902	5.97418	5.63512	5.89053	5.29425	5.39054
A_55_P2169129	4.99578	5.4329	6.30055	4.99201	5.42032	5.21555	5.27497	6.72096	4.47238	5.62541	4.88622	5.82735
A_52_P639028	4.38013	3.10684	4.69988	3.82764	4.19232	2.86426	4.02886	5.04941	4.10069	4.20541	5.34394	3.69932
A_55_P2046563	3.03532	3.10684	3.87348	3.72683	3.58375	3.44161	3.92584	3.26528	3.74935	3.71772	5.54787	3.69932
A_51_P120823	5.222	5.13743	5.11159	4.99201	5.3848	4.56671	4.78302	5.00517	4.2629	5.46864	4.86781	4.99578
A_55_P2028788	10.0229	9.76713	10.0746	9.55377	9.60098	10.3297	10.1562	10.0001	10.3847	9.90274	10.0492	9.59049
A_51_P126067	4.96724	4.48853	4.85541	4.74092	4.95179	4.58936	5.07994	4.82392	5.04759	4.96147	6.29673	4.6239
A_30_P01031466	4.52554	5.08704	5.0888	4.22483	4.90239	4.28002	3.98398	4.63362	4.2629	5.17452	6.00633	4.47778
A_30_P01033003	7.2227	7.1471	7.28531	7.05743	7.37893	6.88099	7.39366	7.49377	7.06329	7.10929	7.44975	7.38757
A_30_P01021252	6.38856	5.97514	6.40213	6.03595	6.37414	5.90464	6.23901	6.0899	6.06498	6.28522	6.1057	6.03045
A_55_P2086659	5.222	5.09761	5.54014	5.30341	5.12543	4.75435	4.78302	4.90038	4.9939	4.78955	5.19272	7.13175
A_52_P556462	4.26915	3.83187	4.63846	4.26915	4.53075	3.36199	3.8234	4.18903	4.47238	4.64087	4.52554	4.82604
A_30_P01025100	4.45877	4.38876	4.80684	4.38876	6.80669	4.69293	4.4615	4.54884	4.2629	4.7319	4.81967	4.37434
A_66_P100853	11.549	10.9605	11.3816	13.5335	11.6216	11.2917	11.475	10.6099	11.0021	10.9535	10.845	10.8004
A_55_P2009882	5.36743	5.46592	5.04759	5.08438	5.71854	4.93223	5.14255	5.45363	5.55044	5.46864	5.91165	5.82735
A_55_P1999760	9.06236	9.0484	9.19109	8.85652	8.76594	9.26745	9.12237	8.65966	9.26119	8.66471	8.70847	8.40181
A_30_P01025325	4.02886	3.98398	4.19561	4.42559	4.19232	4.02886	3.57873	5.07817	3.57873	4.51507	4.20215	4.11811
A_30_P01033562	4.45877	4.20541	4.57934	4.57682	4.7068	3.56356	3.2962	4.92037	4.75212	4.70219	4.45604	5.0888
A_30_P01023778	4.76102	3.67129	3.63787	3.68537	4.76102	3.36199	3.14131	4.3421	4.01033	4.12156	3.65706	4.29081
A_55_P2167999	10.7329	10.5297	10.0469	10.1874	9.9682	9.88911	10.7109	9.98903	10.4304	10.3177	10.0131	9.80794
A_51_P109295	4.61902	4.78302	4.34506	4.3	5.32757	4.28002	4.66476	4.25033	4.82604	4.57682	5.50284	4.7091
A_52_P309890	4.64568	4.80684	5.0888	4.22483	5.12543	4.69293	5.09761	5.13572	4.33616	4.4478	5.92061	4.88419
A_51_P113195	5.52716	4.24716	5.50549	4.38876	5.15947	4.58936	3.7627	4.87807	4.04716	4.02886	4.84708	3.92584
A_55_P2044982	7.35984	8.04377	7.4614	7.37676	7.40878	7.10143	7.33307	7.52054	7.19998	7.30711	7.54489	7.44769
A_30_P01026341	4.42279	3.77592	4.19561	3.68537	4.33913	3.92979	3.69932	3.81489	3.80632	4.29081	4.69293	4.58686
A_30_P01026954	4.21516	3.67129	4.05441	3.57873	5.08704	2.12599	3.2962	4.01405	3.57873	2.69821	4.12845	3.57873
A_30_P01023019	4.38013	4.45877	4.45055	4.20215	4.58936	3.59872	4.02886	4.48585	3.90993	4.37434	4.88622	4.16242
A_55_P2049095	7.51792	7.6953	7.56788	7.36623	7.34384	8.04206	7.80057	7.56312	7.74785	7.66067	7.61203	7.63927
A_30_P01032030	4.45877	4.16577	5.0033	4.26915	4.26915	4.35977	4.02886	4.4615	4.57682	4.70219	4.75658	4.88419
A_30_P01020746	3.98398	4.16577	4.40871	3.63304	4.58936	4.35977	4.02886	4.54884	4.13531	4.20541	4.10768	4.52293
A_51_P173564	12.8044	12.9732	12.8077	12.5637	12.7832	12.9479	12.848	12.9982	13.0472	12.9329	12.9765	12.7995
A_30_P01027041	4.38013	4.58686	5.54014	3.95326	7.19548	4.20215	3.92584	4.57934	4.18903	4.86575	3.7977	4.7091
A_55_P1965694	4.64568	3.10684	5.33354	3.87758	4.01405	3.2962	3.92584	6.0899	4.18903	3.77153	4.75658	4.3272
A_55_P1991461	3.98398	3.32048	4.40871	4.20215	4.47238	3.2962	3.14131	4.3421	4.59931	4.12156	5.61196	4.16242
A_30_P01029024	3.2962	3.67129	4.13873	4.38876	4.13531	3.72228	3.7627	3.92979	3.84866	4.12156	4.16577	4.76544
A_55_P2140487	2.33698	3.46357	5.0033	4.38876	4.19232	4.20215	3.8234	4.48585	4.04716	4.02886	4.31518	4.93813
A_66_P101664	4.38013	4.55653	4.88419	3.95326	5.08704	4.65525	4.2629	4.63362	4.90038	4.70219	5.74007	4.58686
A_55_P1979699	10.3538	10.9443	10.6788	10.7387	10.9523	10.0856	10.6719	10.6375	10.0636	10.4761	10.2856	10.6653
A_30_P01030746	4.12845	3.67129	4.30305	3.95326	4.40588	4.02886	3.2962	3.85283	3.74935	3.54308	4.06522	5.26797
ERCC-00171_229	4.18242	2.91296	4.22162	2.82238	4.33913	3.92979	4.2629	3.92979	3.36199	4.02886	4.22162	4.16242
A_30_P01018338	5.26172	4.86162	5.06835	3.87758	4.90239	5.13401	5.04941	5.00517	5.17119	4.86575	4.47238	5.29118
A_55_P2103206	7.64754	8.72313	8.62947	9.02078	8.75666	8.0237	7.47058	8.86648	8.81415	9.13707	8.6991	8.48604
A_55_P2165334	10.1699	10.2896	10.2972	10.0458	10.2553	10.3237	10.1689	10.2828	10.3084	10.2262	10.3359	10.1044
A_51_P427530	6.39715	6.29367	6.21695	5.73557	6.09034	6.06138	6.13251	6.93456	6.04326	6.06767	6.06498	6.25877
A_66_P100262	3.14131	2.80528	3.2962	2.63187	3.70394	1.37096	2.75274	5.00517	2.96007	2.81386	3.70394	3.69932
A_30_P01029975	4.12845	3.83187	4.75658	5.03665	4.95179	3.88573	3.87758	3.77153	4.01033	4.3272	5.16115	4.29081
A_55_P2071087	5.78655	5.96459	6.10395	5.44123	6.17971	5.96459	5.75573	6.20519	5.91962	5.84628	5.86187	6.08193
A_30_P01022162	5.18117	5.01264	4.80684	5.23961	4.90239	5.4495	4.89635	5.69321	4.66239	4.88825	5.92061	4.88419
A_55_P1972448	7.00645	7.03583	6.81312	7.14922	6.9463	6.83881	6.84902	7.10143	6.78123	6.90225	7.35122	7.27932
A_30_P01031447	4.61902	4.07596	4.19561	4.22483	4.73867	2.66067	3.92584	4.52293	3.80632	4.12156	3.7977	4.47778
A_55_P2148684	3.20788	2.91296	4.37724	3.32048	4.95179	2.27002	2.75274	5.21231	3.80632	3.16161	4.37724	4.4478
ERCC-00123_60	3.65229	1.7864	5.60827	4.12845	5.34837	2.43473	2.63187	5.24596	3.69469	4.16577	4.2629	4.29081
A_55_P2094484	3.2962	3.55846	4.5437	3.32048	4.26915	2.66067	3.14131	4.52293	3.74935	3.83187	3.65706	3.92584
ETG05_66023	4.30305	4.02886	4.63846	4.26915	4.76102	4.42838	4.38876	4.85541	3.90993	4.57682	4.42838	5.26797
A_30_P01030094	5.42732	5.92951	5.95299	5.83264	5.93148	5.55556	5.53237	6.03045	5.17119	5.87729	5.60085	6.62739
A_55_P2084458	3.70394	4.67421	5.06835	3.87758	4.67891	4.49388	3.92584	4.73416	3.62818	4.47238	5.42173	4.93813
A_30_P01031269	4.02886	3.77592	4.75658	4.01405	4.22162	3.83187	3.57873	4.6836	4.01033	4.53853	5.81459	4.4478
A_30_P01031325	4.7091	4.69988	4.63846	4.74092	5.08704	5.15441	4.21516	5.09409	5.1323	4.7319	5.16115	5.13572
A_51_P127681	13.9358	14.2764	13.8175	13.9811	14.189	13.7711	13.8102	14.2477	14.0921	14.2074	14.2534	14.3078
A_30_P01027915	4.55397	4.28466	4.95567	4.3272	4.26915	4.07596	4.3	4.57934	4.33616	5.03298	5.06745	4.6239
A_55_P2093535	14.8815	14.9304	14.5794	14.9188	14.9888	14.5883	14.522	14.8598	14.8872	14.7864	14.7442	14.897
A_30_P01030333	4.42279	4.35977	4.77645	4.84708	6.27671	4.42838	4.75658	5.28349	4.40588	4.51507	4.7091	4.88419
A_55_P2155362	4.38013	3.98398	4.30305	4.45877	5.15947	3.72228	3.44713	4.54884	4.01033	3.59375	4.66476	3.92584
A_55_P2202558	3.8234	2.99819	6.15883	3.78903	4.40588	2.86426	3.14131	4.13873	2.96007	3.59375	5.12887	3.92584
A_55_P2154914	5.82735	5.4329	6.17139	6.44967	5.85566	5.38047	5.91862	5.90765	5.87114	5.95299	5.50284	5.8515
A_30_P01031964	4.67891	3.98398	4.51769	4.3272	4.58936	4.15906	4.38876	5.24596	4.33616	3.98398	4.06522	4.11811
A_30_P01022854	4.30305	3.98398	4.40871	4.3	4.99578	4.11811	3.36783	4.3421	3.44161	3.83187	5.85046	3.92584
A_30_P01026710	6.48835	6.29367	6.12822	6.3419	6.4	6.10133	5.86703	6.66579	6.30588	6.03595	6.2883	6.48231
A_30_P01025376	5.94521	5.41611	5.7909	5.9559	5.63512	5.47946	5.27497	5.6792	5.97323	5.21555	5.63754	5.92951
A_55_P2041626	4.18242	2.69821	5.17119	4.3627	4.30305	4.07596	3.57873	4.20867	4.01033	4.12156	5.03206	3.6427
A_55_P2139431	4.21516	1.31303	6.02768	3.68537	5.30949	3.88573	2.75274	4.63362	4.04716	3.46357	5.69204	2.66067
A_30_P01017900	3.98398	3.67129	3.75826	2.82238	4.10768	3.06436	4.12845	5.73669	4.01033	2.58254	3.83187	3.92584
A_55_P2008443	3.92584	3.98398	4.10768	4.38876	2.92883	2.66067	4.02886	4.4615	4.18903	4.12156	4.12845	4.4478
A_55_P2000668	8.69809	8.87418	8.84179	8.93881	9.18851	8.69461	8.81	9.16436	8.78869	8.93145	8.80087	9.09877
A_52_P640922	4.67891	4.69988	5.21716	5.70363	5.51538	4.52554	4.86781	5.62785	4.80469	5.04941	6.51685	5.04578
A_30_P01031126	2.71203	4.24716	4.30305	3.72683	3.70394	3.72228	3.98398	4.63362	4.04716	4.3272	4.57682	4.58686
A_55_P1967933	3.14131	4.02886	3.75826	3.95326	4.26915	3.72228	4.21516	5.4329	3.90993	3.59375	4.37724	4.52293
A_51_P513032	8.84944	8.85976	8.823	8.7298	8.79992	8.58602	8.4358	8.80719	8.7351	8.83345	8.84055	8.98759
A_51_P480136	4.79172	4.16577	4.05441	4.26915	4.30305	3.59872	3.92584	5.00517	4.10069	4.12156	4.84708	4.37434
A_66_P125873	4.58686	4.24716	4.45055	3.87758	4.22162	3.72228	3.92584	5.57082	4.10069	4.37434	5.26172	5.17785
A_51_P103757	10.6925	10.7049	10.5325	10.5457	10.6253	10.9383	10.5607	10.6512	10.596	10.6562	10.6092	10.6289
A_55_P2166733	3.14131	3.16161	3.87348	4.04716	4.53075	3.20788	3.8234	4.13873	3.57873	3.83187	3.56356	4.16242
A_52_P635015	4.45877	4.24716	4.45055	4.52031	4.37724	4.63241	4.69988	5.36743	4.77645	4.64087	5.58716	5.0888
A_55_P2116094	3.58124	4.07596	3.63787	4.16242	3.92188	3.20788	4.3	4.18903	4.33616	4.3272	4.31518	4.4478
A_30_P01025629	3.8234	3.32048	4.10768	4.16242	4.47238	3.47443	4.3	4.65525	4.10069	4.29081	5.39126	4.37434
A_55_P2118412	2.85182	2.4458	4.01405	3.45811	4.57682	3.36199	3.87758	3.77153	3.50652	2.58254	3.75381	3.87348
A_30_P01024985	4.21516	3.92979	4.13873	3.95326	4.90239	3.47443	3.69932	4.82392	4.53853	3.46357	4.59683	5.58215
A_30_P01029960	4.21516	3.46357	4.01405	4.45877	4.40588	3.47443	4.02886	4.3421	3.69469	4.37434	5.66623	4.02517
A_30_P01024084	4.64568	4.02886	4.57934	5.73557	5.32757	3.59872	4.3	4.94984	3.90993	4.25033	5.22683	3.81489
A_55_P2164890	4.79172	4.16577	4.75658	4.42559	5.56194	4.07596	4.83975	5.04941	4.53853	4.37434	5.06745	4.6239
ERCC-00031_101	3.20788	3.16161	4.10768	3.32048	3.8234	4.31518	3.63787	4.20867	3.14131	3.41368	3.70394	6.78886
A_51_P120093	9.44543	9.49233	10.1729	9.84609	9.70795	10.394	10.012	9.39462	9.77168	9.47119	9.18908	9.14771
A_55_P2064333	3.8234	4.64087	5.1323	3.00569	4.19232	4.38876	4.59931	4.9939	4.47238	4.57682	4.86781	4.93813
A_55_P2199457	4.30305	3.55846	4.37724	4.45877	4.10768	3.92979	3.44713	4.28466	4.40588	4.12156	4.06522	3.98017
A_52_P100926	3.70394	2.18004	5.38767	3.45811	4.93026	3.20788	4.3	4.87807	4.04716	3.71772	4.37724	3.5118
A_55_P2028511	10.7014	10.9376	10.6739	11.1267	11.3765	10.1662	10.6113	10.9347	10.3276	10.9127	10.7612	11.1971
A_51_P106799	12.3427	12.2695	12.6206	12.3213	12.1238	12.9972	12.5005	12.3081	12.3504	12.2876	12.2506	12.2269
A_51_P183213	4.96724	4.48853	4.75658	4.38876	4.88419	4.52554	4.3	4.92037	4.72055	4.64087	5.19272	4.76544
A_30_P01031682	6.91027	7.12982	7.35085	7.41548	7.42478	6.72835	7.13047	7.04155	6.71525	7.24941	6.91849	7.50672
A_51_P142989	7.0248	7.13732	7.00598	7.27409	7.16522	7.04633	6.78995	7.04747	7.13047	7.33716	7.13732	7.13175
A_55_P2015403	8.98569	9.28726	9.4283	9.71951	9.75424	9.02546	9.66938	9.55061	9.18583	9.75862	9.55361	9.81926
A_51_P274073	9.32425	9.61906	8.7112	9.45419	9.318	8.71736	8.74522	9.41845	9.17219	9.46189	9.57457	9.70021
A_55_P2176631	3.65229	2.4458	3.75826	3.00569	4.10768	3.47443	3.04991	3.69469	2.75274	3.41368	4.20215	4.06881
A_30_P01024518	4.02886	3.55846	5.29731	4.09014	4.47238	4.28002	4.63846	4.01405	4.18903	4.07596	4.66476	4.16242
ERCC-00128_189	4.02886	3.98398	3.63787	3.87758	3.8234	4.28002	4.21516	4.3421	4.18903	3.59375	3.99155	3.98017
A_55_P2149500	8.24946	8.42299	8.27025	7.73238	7.69921	8.35356	7.88602	8.15498	8.3201	8.36828	8.19942	8.16862
A_55_P1968824	4.8154	5.26953	5.21716	5.34394	5.23643	4.95567	4.9479	5.17785	5.24438	5.21555	5.54787	4.88419
A_30_P01029221	4.12845	3.41368	4.30305	4.3272	4.33913	3.72228	3.92584	3.77153	3.03532	4.20541	5.83895	4.52293
A_30_P01033166	2.95232	3.88166	2.38955	3.95326	3.92188	3.92979	3.92584	3.77153	3.50652	3.83187	4.42838	3.37364
A_30_P01033522	4.76102	4.75658	4.30305	4.48585	4.76102	5.03298	4.78302	4.48585	4.77645	4.53853	5.04759	4.16242
A_30_P01024625	4.02886	3.41368	3.63787	4.12845	4.85955	3.72228	4.3	4.11811	4.37724	4.51507	4.93026	3.81489
A_30_P01031538	3.92584	2.80528	4.13873	3.87758	4.33913	4.28002	4.3	3.58375	4.18903	4.02886	4.47238	4.4478
A_55_P2137045	4.45877	3.77592	4.57934	4.38876	4.58936	4.35977	3.63787	4.52293	4.13531	4.16577	4.06522	3.98017
A_30_P01026221	4.76102	4.69988	4.37724	4.57682	4.58936	4.80469	5.03114	4.96532	4.18903	4.37434	5.82417	4.99578
A_55_P2267240	4.30305	4.16577	5.1323	4.89837	4.47238	4.35977	4.59931	4.92037	3.80632	4.37434	5.29425	4.76544
A_52_P642207	8.20758	8.14025	8.44411	8.50883	8.64495	8.43067	8.46731	8.45982	8.33479	8.41895	8.25518	8.55822
A_55_P2002702	9.007	8.78453	8.61789	8.87328	8.94882	8.74907	8.29945	8.77811	8.89996	9.03236	8.9785	9.07751
ERCC-00098_150	4.30305	4.07596	4.34506	4.6906	4.81327	3.47443	4.12845	5.09409	3.80632	4.20541	4.80469	4.11811
A_55_P2125049	11.7307	11.646	12.0104	11.7832	11.891	11.9984	12.1251	12.0929	12.0748	11.9851	11.7887	11.9576
A_55_P2173927	7.65933	7.41566	7.83914	7.85792	8.02658	7.74463	7.30331	7.45952	7.52495	7.74701	7.8237	7.92698
A_30_P01017687	5.82735	5.63754	6.43307	6.20926	6.20111	5.6792	6.20763	6.15546	5.92951	6.0899	5.61196	6.23582
A_52_P674467	4.58686	3.98398	4.51769	4.3272	4.90239	4.63241	4.66476	4.01405	4.72055	3.87758	4.12845	4.96339
A_30_P01028590	5.553	5.61196	6.05144	5.92951	5.69321	5.36013	5.81459	5.95493	5.39054	5.89053	5.69204	5.90464
A_30_P01032501	4.12845	4.35977	5.06835	4.63846	4.76102	4.20215	4.63846	4.01405	4.47238	4.37434	4.52554	4.16242
A_55_P2070069	6.9623	7.27448	7.19957	7.51726	7.39491	7.02503	7.14922	7.56962	7.03285	7.28839	7.20407	7.53098
A_55_P2175502	5.12887	4.69988	5.06835	4.79606	5.04578	4.75435	4.7251	4.54884	5.11159	4.7588	4.84708	4.88419
A_30_P01033458	6.24298	6.37378	6.45995	6.59044	6.55954	6.70319	6.5403	6.65449	6.53512	6.503	6.57476	6.59324
A_30_P01022984	4.21516	3.77592	4.13873	3.32048	4.53075	3.20788	4.3	4.01405	3.57873	3.92979	3.56356	4.11811
A_55_P1964307	7.68219	7.91731	8.02831	7.95898	7.90181	7.75982	7.63912	8.00802	7.74196	7.96404	7.7414	8.07865
A_55_P2115330	8.62811	8.31529	9.5596	9.09943	8.73785	9.5908	9.04857	8.94962	9.43517	9.05197	9.15764	9.79765
A_30_P01026561	4.64568	4.45877	5.43568	4.42559	4.81327	4.72055	4.59931	6.31572	4.18903	4.4478	5.39126	4.3272
A_52_P356119	6.74694	6.74414	6.62921	6.31911	6.71353	6.74077	6.3792	7.1583	6.85318	6.78995	6.60348	6.5659
A_51_P114005	6.57539	6.79483	6.65479	6.95892	6.69943	6.59168	6.67287	7.38073	6.601	6.84275	6.72665	7.02872
A_30_P01025578	3.44713	3.41368	3.97827	3.57873	4.33913	4.15906	3.8234	4.63362	3.80632	3.59375	4.66476	4.47778
A_30_P01021633	5.82735	5.21878	5.70651	5.81779	6.25169	5.21555	5.23164	5.86187	5.83316	5.07639	7.01065	6.02029
A_30_P01020025	3.70394	3.26528	4.19561	4.01405	4.40588	3.06436	3.57873	3.85283	3.80632	4.8387	4.51243	4.4478
A_55_P2128326	8.12342	8.42683	8.34647	8.3081	8.46382	8.4264	8.60173	8.62308	8.48033	8.50709	8.46739	8.58006
A_55_P1995404	5.33354	5.17785	5.63875	5.10287	4.99578	6.20193	5.58215	5.81031	5.68739	5.17452	5.19272	5.48215
A_52_P385594	4.76102	4.24716	5.73669	4.63846	4.85955	4.4615	4.7251	5.00517	5.22522	4.20541	4.99578	5.65076
A_30_P01030544	5.09761	4.3212	4.69988	4.52031	4.95179	4.77645	4.38876	4.92037	4.53853	5.11506	5.12887	5.22522
A_55_P2136813	8.2892	8.07476	8.28468	8.16234	8.10181	8.47586	7.99795	8.37708	8.33199	8.32057	8.5487	8.59117
A_52_P84096	11.6938	11.5124	13.0436	12.0086	11.3143	12.885	13.0098	11.4485	12.5124	11.4926	11.3704	10.9565
A_30_P01021643	4.02886	4.45877	4.69988	4.38876	4.57682	3.72228	3.57873	4.20867	3.94937	4.51507	4.31518	4.55397
A_30_P01020931	3.20788	3.10684	4.19561	3.68537	3.92188	3.14131	3.14131	3.77153	1.38224	3.46357	3.75381	4.11811
A_51_P247393	4.48585	4.48853	5.01822	3.78903	4.10768	3.36199	3.57873	4.07952	2.49994	3.92979	4.10768	4.20541
A_30_P01033015	4.52554	3.59375	5.06835	3.16161	4.13531	3.47443	3.50652	3.63787	3.44161	4.37434	3.99155	3.98017
A_52_P1036735	3.92584	4.24716	4.85541	4.04716	3.70394	3.20788	3.87758	4.78302	3.80632	3.71772	5.4048	4.29081
A_51_P277431	10.7569	11.0849	10.4827	10.5205	10.7468	10.1839	10.2488	11.0311	10.6859	10.698	10.8485	10.8355
A_66_P109978	4.21516	4.52554	4.88419	4.04716	5.42032	4.42838	4.02886	4.6836	4.82604	5.04941	4.96916	4.82604
A_51_P227165	7.7216	7.74673	7.51988	7.16355	6.81899	7.4901	7.6953	7.83335	7.69892	7.75399	7.89829	7.17024
A_55_P2144115	4.76102	3.55846	4.22162	4.84708	4.01405	2.86426	1.37096	4.82392	4.01033	4.16577	6.68344	4.3272
A_51_P104430	6.35738	6.64911	6.04144	6.20926	6.77301	6.10133	6.39928	6.74862	6.39715	6.4219	6.44416	6.37124
A_30_P01020898	3.8234	4.52554	4.91041	4.26915	5.04578	4.24399	3.57873	2.55212	3.57873	4.64087	4.2629	5.6792
A_55_P2412349	3.14131	4.07596	4.88419	4.09014	4.53075	3.59872	3.2962	4.20867	4.10069	4.29081	4.66476	4.37434
A_51_P480398	4.26915	2.99819	3.75826	3.57873	3.92188	2.66067	2.75274	3.69469	3.80632	4.02886	3.65706	4.20541
A_55_P2112135	3.58124	3.67129	3.57873	3.95326	4.40588	2.86426	3.21438	3.63787	3.50652	4.20541	2.85598	4.11811
A_55_P2117711	10.7014	10.5676	10.5058	10.2919	10.4474	10.8584	10.4345	10.5489	10.7897	10.4545	10.8086	10.5005
A_30_P01020194	3.44713	2.91296	5.36743	3.78903	4.4478	0.278361	3.14131	6.17139	3.14131	2.91296	3.56356	4.25033
A_52_P1042732	7.84098	7.67412	7.00176	7.1889	7.50639	7.40931	7.65605	7.46701	7.54939	7.02641	7.27952	6.57476
A_55_P1979669	8.1781	7.96163	8.03589	7.61003	7.76619	8.18782	8.11043	8.03635	8.11759	7.84412	8.33274	7.74196
A_30_P01030357	5.33354	5.08704	5.60827	5.00984	4.93026	4.4615	4.9479	5.13572	4.77645	5.32607	5.50284	5.29118
A_51_P119401	7.98685	8.29983	8.03084	7.59456	7.82701	7.98602	7.92475	7.82304	8.05387	7.87389	7.81985	7.7862
A_55_P2249136	3.8234	3.92979	4.37724	4.12845	4.47238	4.20215	1.37096	4.52293	3.44161	4.02886	4.52554	4.37434
A_52_P194851	5.33354	5.39911	5.90264	5.3848	5.67744	5.61196	5.49953	5.71854	5.74904	5.6792	6.53252	5.86806
A_66_P113946	3.14131	2.91296	3.97827	3.45811	3.58375	2.43473	3.44713	3.85283	1.38224	4.37434	2.75274	2.75274
A_66_P111735	6.36469	6.503	6.46744	6.15799	6.29367	6.25011	6.42959	6.3419	6.02399	6.06767	6.45995	6.23582
A_55_P2012349	11.7575	11.7585	11.4176	11.467	11.5567	11.3579	11.2746	11.6632	11.7172	11.5454	11.6911	11.571
A_55_P1978755	5.13914	5.04578	5.1323	4.38876	4.90239	5.25228	5.07994	4.96532	5.35866	5.29118	5.26172	7.0356
A_51_P120066	6.84118	6.75141	6.9623	6.52275	6.72835	7.05721	6.4445	6.82695	6.98715	7.07849	7.03972	6.94971
A_51_P124568	10.4936	10.2562	10.573	10.2882	10.1926	10.536	10.55	10.4885	10.7458	10.2064	10.392	10.248
A_55_P2009895	6.57539	6.89924	7.00598	6.57476	7.53682	6.8687	6.72039	6.83118	6.59355	7.04883	6.85837	6.5589
A_51_P288916	10.5277	10.629	10.0645	10.1974	9.87797	9.78107	10.0154	10.3076	10.0617	9.98024	10.2601	9.91013
A_30_P01029133	4.86781	4.64087	4.45055	4.04716	4.81327	4.35977	4.12845	4.40019	4.40588	4.7588	4.66476	4.40304
A_52_P1013543	3.8234	4.3212	4.88419	3.45811	4.33913	3.47443	4.02886	5.47946	3.14131	4.29081	3.99155	4.20541
A_55_P2085133	4.8154	3.55846	3.87348	4.04716	4.67891	4.02886	3.2962	6.94533	3.74935	4.16577	5.92951	4.11811
A_30_P01024899	4.02886	5.25701	5.04759	4.63846	4.99578	4.75435	4.66476	5.03298	4.33616	4.9144	4.88622	4.82604
A_55_P2067142	16.1803	16.1803	15.7637	15.9139	15.9341	16.0023	15.9659	16.1803	16.0565	15.9171	16.0293	15.9224
A_55_P2052848	13.5425	13.1746	13.2245	13.2245	13.1548	13.4499	13.4025	13.2951	13.4871	13.2516	13.4962	13.2912
A_55_P2121349	7.96945	7.97316	7.98389	7.8233	7.86477	7.90921	7.66497	7.90382	7.99217	7.78443	8.15709	8.07118
A_55_P2172364	4.52554	3.98398	4.45055	4.38876	5.60827	3.92979	4.38876	4.82392	4.37724	3.26528	5.39126	5.0888
A_51_P361788	12.71	12.5672	12.2963	12.3122	12.5316	12.4912	12.4539	12.5453	12.5665	12.376	12.5897	12.4644
A_55_P2025006	4.61902	4.16577	4.51769	4.3272	4.57682	4.35977	4.12845	4.73416	3.90993	6.70549	4.59683	4.91041
A_52_P21550	9.03259	9.07032	8.68237	8.21011	8.48512	8.5276	8.33516	8.80719	8.93747	8.56784	8.69461	8.05861
A_55_P2341025	4.30305	4.99955	5.0033	3.95326	4.67891	2.96777	3.8234	4.07952	4.40588	4.12156	6.20233	4.4478
A_55_P2163622	15.3516	15.2779	15.0223	15.1681	15.2934	15.005	14.9429	15.4308	15.1906	15.1264	15.2372	15.2779
A_55_P2084547	5.05485	5.20255	5.23483	4.89837	5.15947	4.63241	4.21516	5.33354	5.0888	5.66623	4.96916	5.26797
A_51_P290937	3.36783	3.55846	4.22162	3.32048	3.58375	3.20788	2.48927	3.77153	3.44161	3.59375	4.37724	3.69932
A_51_P410516	4.76102	4.83449	5.31554	4.45877	4.81327	4.75435	4.17246	4.82392	4.33616	4.96147	4.52554	4.7091
A_30_P01020549	6.10919	5.95493	5.60827	5.6686	5.66505	5.58341	5.33354	5.83474	5.91962	5.92853	6.31497	5.58215
ERCC-00086_228	3.44713	4.02886	4.22162	3.45811	4.93026	3.98398	2.96777	4.25033	1.88705	3.92979	4.12845	4.11811
A_55_P2026460	4.02886	4.16577	5.04759	4.3627	7.46786	3.56356	3.92584	4.85541	4.01033	4.67421	4.47238	3.75826
A_51_P476481	6.28445	5.8629	7.02526	5.73557	7.18973	6.47354	5.86703	6.4407	5.89659	6.29597	6.04508	6.10395
A_55_P2174524	3.77153	3.55846	4.13873	3.68537	3.8234	4.42838	3.69932	5.65494	4.18903	4.37434	5.92951	4.29081
A_51_P305811	4.26915	3.55846	4.01405	3.87758	4.58936	4.11811	3.8234	4.01405	4.10069	4.20541	5.13743	4.29081
A_55_P2052719	8.81908	8.74907	8.99592	8.67268	8.34665	9.20297	8.92361	8.55039	8.71185	8.37191	8.55862	8.34628
A_30_P01022886	4.76102	5.04578	5.45637	4.52031	4.85955	4.91041	5.04941	5.00517	5.03298	5.03298	6.30436	5.04578
A_51_P406077	14.0517	13.9609	14.3345	13.9746	13.7066	14.4658	14.2444	13.7871	13.7161	13.5953	13.6481	13.6546
A_55_P1953138	4.48585	4.16577	4.75658	3.92584	4.85955	4.28002	3.92584	4.52293	4.10069	4.37434	3.99155	4.16242
A_51_P484500	4.38013	3.98398	4.22162	4.04716	4.67891	3.92979	4.17246	4.52293	3.20788	4.02886	3.87758	4.37434
A_55_P2016888	4.02886	3.67129	3.97827	3.45811	3.92188	3.20788	4.07952	4.20867	4.3	4.29081	3.99155	3.69932
A_51_P485421	10.511	9.18185	10.2456	8.92787	8.12601	7.17024	9.55377	10.0644	8.85211	8.53847	8.22777	8.30316
A_55_P2058933	11.6153	11.5582	11.7691	11.4203	11.4856	11.9707	11.5743	11.421	11.6163	11.421	11.6003	11.3614
A_52_P214630	6.50367	6.69393	6.24615	6.06318	6.15841	6.61333	6.503	7.28954	6.50565	6.56527	6.81151	6.6916
A_55_P1996802	4.73867	4.95567	5.36743	5.21878	6.11353	4.80469	5.14255	5.35132	4.96339	5.04941	5.0888	4.93813
A_51_P466673	8.6185	8.57912	8.31793	8.39558	8.4794	8.06233	8.16758	8.50445	8.38312	8.43493	8.19193	8.425
A_55_P2101585	8.15413	8.13737	8.05974	7.29089	8.36044	8.02612	8.13854	8.39977	8.54412	7.9003	8.05319	8.11824
ERCC-00097_63	4.58686	4.24716	4.37724	3.87758	4.19232	3.14131	3.69932	5.09409	3.69469	3.16161	3.94937	4.29081
A_52_P221776	4.12845	3.88166	4.80684	4.54112	4.47238	4.20215	3.98398	5.21231	4.85541	4.93813	5.00517	4.6239
A_55_P1989419	7.38972	7.23552	7.12359	7.07046	7.23092	6.88099	7.09265	7.61999	7.16019	7.17316	7.63821	7.12574
A_30_P01030230	4.52554	4.24716	5.17119	4.38876	5.12543	4.20215	3.87758	5.4329	4.33616	4.64087	4.75658	5.01264
A_30_P01019562	3.2962	-0.170805	4.85541	2.91296	5.4808	3.14131	3.36783	3.69469	3.44161	4.02886	3.56356	4.88419
A_52_P515769	8.457	7.97782	8.33683	7.72842	8.25124	9.16446	8.56736	8.20493	8.30393	7.86632	8.29802	8.173
A_30_P01032611	4.38013	4.07596	4.13873	3.45811	4.01405	3.83187	4.02886	4.82392	4.01033	4.4478	5.27885	4.4478
A_55_P2351300	4.18242	4.55653	3.63787	3.00569	3.70394	3.59872	3.63787	4.37724	4.33616	4.3272	4.66476	3.5118
A_51_P257712	3.8234	3.26528	4.83449	3.95326	4.01405	4.02886	3.44713	4.92037	3.80632	4.02886	4.93026	6.18054
A_30_P01021194	1.30151	2.30693	5.21716	3.68537	4.26915	3.72228	0.036544	4.28466	3.69469	3.41368	5.94228	4.02517
A_55_P2141841	5.05485	4.91041	4.93223	5.10287	5.23643	4.95567	4.52815	4.82392	4.57682	5.13487	5.45088	5.26797
A_52_P590661	6.34634	6.88786	6.19661	6.25641	6.75085	6.33372	6.35847	6.72096	6.36687	6.74105	6.65628	7.18973
A_55_P2132268	4.18242	4.28466	4.13873	3.95326	6.35002	3.92979	3.63787	4.31215	4.01033	4.29081	4.06522	4.37434
A_55_P2020656	6.09782	6.17556	6.11353	6.00914	6.10395	6.44485	5.99507	5.99507	6.08637	5.92853	6.26894	5.92951
A_55_P2090787	5.4982	5.20255	5.45637	4.89837	5.49953	5.63754	5.67685	5.65494	5.61931	5.49953	5.81459	5.42872
A_30_P01027977	4.52554	4.58686	3.97827	4.26915	5.08704	4.49388	3.2962	4.3421	3.57873	4.4478	5.12887	4.29081
A_55_P1993001	5.84105	4.72283	4.98063	4.3	4.19232	3.56356	4.12845	5.28349	4.47238	4.57682	5.87371	4.20541
A_30_P01031108	4.79172	4.55653	5.91265	4.45877	4.95179	4.69293	4.2629	5.13572	5.04759	4.67421	5.56066	4.85541
A_55_P2004811	13.141	13.0797	12.9774	13.226	13.2772	12.8053	12.9263	13.2537	12.9163	12.9803	13.0788	13.3135
A_55_P2170413	3.98398	3.98398	3.97827	3.87758	4.7068	4.49388	3.44713	4.65525	4.33616	3.71772	5.06745	4.29081
A_55_P2131951	4.52554	3.59375	4.30305	4.45877	4.95179	4.42838	4.38876	4.63362	4.59931	4.02886	5.26172	4.99578
A_30_P01025312	5.05485	5.23483	5.46999	5.34394	5.3848	4.95567	4.96916	5.45363	5.03298	5.36378	4.88622	5.97991
A_51_P206445	5.73557	5.83895	5.80602	5.70363	5.60827	5.76902	5.49953	5.82417	5.93738	5.70938	5.69204	5.88036
A_30_P01027233	6.10919	5.8976	5.46999	5.7909	5.88036	5.71854	5.42872	6.2406	6.09606	5.70938	6.66401	5.42872
A_30_P01017635	3.44713	1.95058	3.87348	3.87758	4.30305	3.68069	4.02886	6.48029	3.57873	3.83187	3.87758	3.81489
A_55_P2050192	14.0725	14.2744	14.548	14.3518	14.0014	14.6447	14.398	14.4478	14.3012	14.358	14.5233	14.1916
A_30_P01019737	3.58124	3.26528	4.5437	3.45811	3.76712	4.02886	4.38876	4.04351	4.33616	4.57682	5.04759	3.92584
ERCC-00028_121	4.38013	3.10684	4.63846	4.04716	4.01405	4.63241	3.87758	4.43117	3.90993	4.4478	4.42838	4.4478
A_51_P126626	8.70091	8.48453	8.06783	8.31113	8.28959	8.43198	8.36044	8.62719	8.35025	8.04331	8.43459	8.43198
ERCC-00163_81	3.58124	3.88166	4.37724	3.78903	4.40588	3.06436	3.69932	4.87807	4.18903	3.54308	5.29425	4.88419
A_51_P249286	5.18117	4.69988	4.91041	4.45877	5.3848	5.29118	4.83975	4.94984	4.77645	5.32607	4.88622	4.68477
A_55_P2117222	5.91165	5.52716	5.65911	6.13678	6.32325	5.88138	5.7111	6.13336	5.4048	5.87729	5.77672	6.02029
A_55_P2181109	9.1832	8.75666	9.03208	8.78848	8.99197	8.99985	8.71907	8.75109	9.15004	8.87213	8.93458	9.00126
A_55_P2000603	11.1267	11.0546	10.8894	11.0481	11.0531	10.8494	10.8477	10.9701	10.846	10.8851	10.957	11.0171
A_55_P2049061	10.2435	10.3507	10.8713	10.6597	10.3256	10.7821	11.0115	10.4772	10.6799	10.5941	10.3247	10.4516
A_30_P01033614	4.52554	4.64087	4.75658	4.45877	5.08704	4.56671	4.4615	5.36743	4.53853	4.4478	4.69293	4.65287
A_55_P2026291	10.203	10.2608	9.81015	10.0344	10.2112	10.04	9.90189	10.1364	10.1894	10.2485	10.1691	10.2929
A_55_P2107957	6.5322	6.56527	6.4219	6.70636	7.05743	6.30816	6.64161	6.53803	6.52732	6.51291	6.57476	7.50672
A_55_P2036994	4.38013	3.98398	4.98063	4.22483	5.2742	4.02886	4.38876	4.65525	4.01033	4.47238	3.59375	4.93813
A_55_P2075692	4.02886	4.45877	3.87348	4.22483	4.40588	4.31518	4.02886	4.07952	4.10069	4.02886	4.91041	5.6792
A_51_P230098	4.38013	3.67129	3.81489	4.96339	4.53075	3.83187	4.66476	4.01405	4.47238	4.64087	4.69293	4.40304
(+)E1A_r60_3	4.30305	3.98398	4.45055	4.57682	4.01405	4.4615	4.21516	4.63362	3.94937	4.3272	4.31518	3.69932
A_51_P348652	10.6548	10.5881	10.9436	10.8279	10.6797	10.8829	10.6399	10.6076	10.6752	10.733	10.5895	10.7093
A_55_P2067620	4.21516	2.69821	4.22162	4.12845	4.10768	4.28002	4.3	4.85541	4.10069	3.92979	3.65706	4.7091
A_30_P01026906	4.96724	4.97491	4.80684	4.99201	4.99578	4.49388	4.66476	4.9939	4.22162	5.00517	4.57682	4.82604
A_30_P01027328	4.94984	5.23483	5.50549	4.12845	4.81327	4.69293	4.69988	4.80469	4.59931	5.3848	4.80469	5.17785
A_30_P01024720	4.18242	3.92979	4.48317	4.3272	4.13531	3.56356	4.02886	4.6836	3.69469	4.25033	4.37724	4.52293
A_51_P411297	7.6051	7.42128	7.86412	7.7695	7.99347	7.66926	7.55771	7.42915	7.69487	7.8721	7.91657	7.96693
A_30_P01024846	3.77153	2.91296	5.38767	4.57682	4.40588	4.42838	4.42838	4.4615	3.84866	4.3272	5.71282	4.20541
A_66_P102271	4.12845	3.67129	3.81489	3.57873	4.64808	2.75274	3.92584	3.90592	3.50652	3.67129	4.73867	3.98017
A_55_P2052465	4.38013	3.98398	3.87348	4.20215	4.58936	4.11811	4.12845	3.77153	3.90993	4.20541	4.31518	4.06881
A_30_P01020580	5.553	5.46592	5.29731	6.15799	5.69321	5.61196	5.19107	5.46592	5.57838	5.74904	6.19045	6.05687
A_30_P01033442	3.2962	2.18004	3.50652	3.57873	4.6239	3.68069	4.07952	3.92979	3.2962	3.32048	3.44161	3.57873
A_55_P2106404	4.30305	4.42838	4.13873	4.6906	4.76102	4.20215	4.12845	4.54884	4.2629	4.4478	5.50284	4.7091
A_55_P2160628	3.70394	3.98398	3.75826	4.45877	5.04578	3.92979	4.12845	4.3421	4.47238	4.4478	5.04759	4.55397
A_51_P481768	3.8234	3.67129	4.45055	3.78903	4.26915	3.44161	3.8234	3.58375	4.01033	4.02886	4.80469	3.2962
A_55_P2055888	3.2962	3.77592	4.01405	3.68537	3.87348	3.36199	2.85598	3.85283	3.57873	3.46357	3.94937	3.69932
A_30_P01020880	2.71203	3.55846	4.05441	3.68537	3.2962	4.02886	3.63787	4.13873	4.40588	3.71772	4.12845	4.20541
A_55_P2178743	3.51706	3.41368	4.51769	4.04716	4.81327	3.06436	4.34506	3.72683	4.53853	4.29081	4.06522	4.29081
A_55_P2113940	5.65673	5.30797	5.29731	5.81779	5.89558	5.36013	5.27497	5.36743	5.43568	5.6792	5.7974	5.90464
A_30_P01022105	6.64911	6.53317	7.01437	7.03789	7.0511	6.97095	6.58731	6.91675	6.70319	6.97883	7.11711	6.86767
A_30_P01018631	4.30305	3.83187	3.69932	3.68537	3.8234	3.59872	4.12845	3.69469	4.33616	4.4478	5.04759	3.69932
A_55_P2093720	6.48835	6.41698	6.8687	6.94971	6.76031	7.05721	7.06239	6.93995	6.74077	6.95456	6.72096	6.67582
A_30_P01024877	3.58124	3.41368	5.29731	3.00569	4.26915	3.36199	3.69932	4.13873	3.57873	4.20541	4.75658	3.44713
ETG09_35454	3.14131	3.88166	3.14131	3.68537	4.19232	3.83187	4.07952	4.40019	3.80632	3.92979	4.12845	3.81489
A_55_P2122688	9.76575	9.65685	9.56373	9.62527	9.38633	9.78829	9.45042	9.68889	9.65685	9.70943	9.7479	9.57957
A_55_P2013705	3.65229	2.69821	3.87348	3.00569	4.05441	4.24399	3.92584	3.77153	3.44161	3.32048	4.6239	4.6239
A_30_P01032659	3.8234	4.07596	4.37724	3.82764	3.961	2.66067	2.96777	3.69469	2.49994	2.99819	3.99155	4.02517
A_55_P2071581	7.31958	7.08027	7.24941	7.64574	7.80944	7.283	6.68869	7.2126	7.14328	7.32221	7.17732	7.61448
A_55_P2025855	9.11989	9.54221	9.36407	9.65927	9.59982	8.94919	9.32275	9.45672	8.83292	9.43704	8.96912	9.53071
A_51_P521307	4.3421	3.55846	3.20788	3.87758	4.4478	3.2962	4.3	5.21231	4.13531	3.92979	7.17274	3.2962
A_55_P2067161	3.8234	4.3212	4.13873	4.45877	4.64808	4.02886	4.3	3.81489	4.18903	4.47238	3.65706	4.06881
A_55_P2070940	7.24506	6.97191	7.27952	7.00036	7.14774	7.03606	6.88354	7.50606	7.35856	7.14498	7.19998	7.43402
A_30_P01020691	4.30305	5.04578	5.04759	5.17785	4.90239	4.35977	4.66476	4.40019	4.69757	4.47238	3.83187	4.93813
A_52_P362111	10.7778	10.7433	10.5744	10.7548	10.7586	10.6111	10.3965	10.8411	10.8506	10.7902	10.777	10.8029
A_52_P708507	4.7091	3.71772	5.1323	3.45811	4.40588	4.24399	4.66476	4.3421	4.33616	4.57682	3.75381	3.14131
A_30_P01025445	3.58124	3.55846	5.4048	3.45811	4.30305	4.07596	4.34506	4.3421	4.37724	4.51507	3.87758	4.11811
A_52_P605812	8.89819	8.72562	8.58711	8.9498	9.13899	8.7315	8.58766	8.81448	9.007	8.99185	8.79127	9.20343
A_55_P2038384	2.71203	2.91296	3.44161	3.78903	3.70394	1.62193	4.12845	2.75274	3.2962	2.91296	2.75274	4.20541
A_30_P01031531	3.8234	3.32048	4.22162	3.57873	4.22162	1.37096	4.4615	3.55846	3.2962	4.07596	3.44161	3.75826
A_30_P01021149	3.14131	3.77592	4.13873	3.45811	4.01405	3.47443	3.92584	3.47443	4.18903	4.12156	3.83187	4.37434
A_55_P2043062	6.08946	5.37179	5.88748	6.0766	5.97848	6.35517	6.32024	5.86187	5.9588	5.63754	5.76571	5.78873
A_30_P01027529	3.8234	3.67129	4.05441	3.87758	3.70394	4.02886	4.4615	5.13572	3.44161	3.32048	3.32048	3.81489
A_30_P01020850	3.65229	3.98398	4.95567	3.68537	4.37724	3.78903	4.3	5.81031	4.92037	3.83187	4.77645	3.57873
A_55_P2136793	3.77153	4.35977	4.69988	3.95326	4.7068	4.58936	3.57873	7.06912	4.37724	3.98398	4.28774	3.81489
A_30_P01032882	5.79632	5.74007	5.978	6.06318	6.09034	5.87422	5.92951	6.66579	6.03228	6.0469	5.97705	5.88036
A_55_P1992838	8.58336	8.13502	8.19183	8.16234	8.24471	8.12923	8.10433	8.36409	8.38312	8.33553	8.77702	8.64021
A_51_P106428	10.9099	10.7915	10.7399	10.9785	10.8455	10.8453	10.5996	10.8203	10.7803	10.9206	10.8576	10.9625
A_51_P123134	4.42279	4.45877	4.45055	4.57682	3.70394	4.49388	4.12845	4.90038	4.37724	3.98398	6.31497	4.29081
A_51_P124606	6.94728	6.94874	6.71296	6.29673	6.47287	6.65628	6.35847	7.19302	6.66045	6.46404	6.26894	6.6916
A_51_P228254	9.19955	9.43356	9.0968	9.23599	9.42248	9.33518	8.96263	9.42738	9.45843	9.32519	9.44111	9.27406
A_55_P2170813	12.4918	12.4664	11.9854	12.2308	12.7454	12.208	12.0729	12.4841	12.4905	12.3914	12.5238	12.4861
A_52_P734742	5.16785	5.553	5.0888	4.99201	5.42032	5.07282	4.89635	5.46592	5.29425	5.46864	5.21231	5.88036
A_55_P1986306	9.84988	9.75529	9.77895	9.38485	9.63623	10.0791	9.67034	9.90894	9.85965	9.87631	9.92176	9.77642
A_30_P01028727	3.2962	2.80528	3.87348	4.04716	4.10768	3.72228	2.48927	2.75274	3.57873	3.16161	3.75381	4.37434
A_55_P2037812	9.95567	9.80452	10.519	9.8568	9.82335	10.4555	9.91593	9.84417	10.4546	9.8924	10.1366	9.83439
A_30_P01023787	4.67891	3.77592	4.88419	4.45877	4.51243	4.15906	2.75274	4.63362	3.94937	4.12156	3.92188	4.6239
A_52_P229044	7.6051	7.97531	7.33008	7.627	7.43524	7.38542	7.41037	7.94904	7.59238	7.70239	7.73238	7.70758
A_55_P2055354	4.48585	3.55846	5.0888	3.95326	4.10768	2.86426	2.48927	4.07952	3.74935	4.29081	4.12845	4.4478
A_30_P01026389	4.52554	3.88166	5.17119	3.95326	3.8234	3.20788	3.69932	5.13572	4.3	4.37434	3.44161	4.55397
A_30_P01032107	4.42279	4.75658	4.6092	8.7831	4.64808	4.24399	4.34506	4.6836	4.2629	4.3272	5.90264	4.52293
A_30_P01022239	4.52554	3.55846	3.63787	4.3272	3.92188	3.92979	3.7627	3.32048	3.20788	4.07596	4.34506	5.11332
A_30_P01032868	4.18242	4.42838	5.31554	4.57682	4.58936	4.49388	4.17246	4.28466	4.33616	4.96147	4.47238	5.11332
A_55_P2064063	5.84105	6.07482	5.978	5.77781	5.77342	5.74232	6.10919	5.94326	5.63512	5.87729	5.82417	5.8515
A_52_P130787	7.70326	7.8449	7.98139	7.66334	7.29587	8.01953	7.19835	7.73985	7.73971	7.30711	7.79137	7.36605
A_55_P1960708	9.2899	9.32566	9.15822	8.88287	9.01271	9.4029	8.6325	9.03351	9.18939	9.01283	9.35106	9.04846
A_51_P210143	10.3396	10.6953	10.8474	10.6627	10.6238	10.1896	10.533	10.4652	10.117	10.0588	10.4969	10.3542
A_55_P2005330	9.77957	9.72315	9.88301	9.61239	9.67152	9.96922	9.81383	9.99416	9.85485	9.58102	10.0472	9.65998
A_66_P110251	7.77692	7.95898	8.05297	8.12375	8.04548	7.58442	7.73436	8.0457	7.55675	7.82728	7.49478	7.80299
A_30_P01023438	3.92584	4.16577	4.10768	4.63846	4.90239	3.98398	3.87758	4.31215	3.44161	4.20541	4.28774	3.81489
A_30_P01032826	4.12845	3.59375	4.19561	4.04716	5.25701	4.07596	3.63787	4.04351	3.20788	4.20541	3.83187	4.37434
A_51_P305230	4.73867	5.30797	5.21716	5.60085	4.76102	5.38047	5.14255	5.60085	4.72055	4.57682	6.15841	5.39054
A_55_P2124140	4.30305	3.67129	4.22162	4.26915	4.47238	3.20788	3.2962	4.07952	3.57873	4.51507	6.00633	4.58686
A_55_P2353181	2.95232	3.26528	3.57873	3.16161	3.8234	3.06436	3.04991	4.20867	3.50652	4.20541	3.56356	4.25033
A_55_P1982532	5.31554	5.58215	6.00071	5.46183	5.60827	5.17119	5.04941	4.80469	5.03298	5.7646	5.00517	7.31014
A_51_P210350	4.92037	5.04578	5.1323	4.7091	5.39911	5.13401	4.91838	5.28349	4.77645	5.13487	5.4329	4.99578
A_52_P448466	7.36878	7.42793	7.12359	7.06553	6.9463	7.54134	7.43905	7.26004	7.26493	7.00294	7.63821	7.07537
A_55_P2125947	12.8878	12.828	13.9092	13.0369	12.921	14.4314	14.3438	12.9961	13.3617	13.0397	12.789	12.3833
A_30_P01024466	3.8234	3.67129	4.10768	3.57873	4.13531	3.83187	2.96777	4.37724	3.69469	3.32048	4.88622	4.58686
A_51_P247799	8.75067	8.70459	8.79965	8.35659	8.50345	8.77777	8.76069	8.86841	8.83128	8.5886	8.74536	8.85613
A_30_P01028804	3.2962	4.3212	4.66476	3.95326	4.26915	3.59872	3.57873	4.07952	3.90993	4.4478	4.37724	4.93813
A_30_P01023905	4.02886	4.52554	4.48317	4.65764	7.21584	4.56671	2.96777	4.20867	4.04716	3.92979	3.44161	4.16242
A_52_P476560	11.0459	10.9834	11.1355	10.6085	10.6361	11.3788	11.0206	11.0981	11.0331	10.8365	11.1375	10.8926
A_55_P2113984	7.36478	7.44217	7.19957	7.10798	7.32033	7.11016	7.22189	7.2126	7.54118	7.13004	7.61203	7.09419
A_30_P01032173	3.14131	2.99819	4.26915	3.78903	3.92188	3.06436	3.8234	4.57934	4.10069	3.67129	3.99155	4.29081
A_55_P2030160	8.81308	8.81915	8.75694	9.19396	9.11458	8.30116	8.45948	8.76373	8.49048	8.71213	8.95308	8.90222
A_30_P01024143	4.21516	3.26528	3.97827	4.54112	4.22162	3.06436	3.2962	6.48029	4.01033	4.60427	5.32607	3.87348
A_55_P1967473	4.08307	3.88166	4.51769	3.87758	4.67891	4.28002	2.96777	4.3421	4.2629	4.29081	3.7977	3.81489
A_55_P2130997	3.92584	4.38876	4.57934	3.68537	5.69321	3.44161	2.75274	4.63362	4.10069	3.83187	4.80469	4.52293
A_30_P01019928	5.52716	5.41611	5.54014	4.74092	5.61809	4.93223	5.00142	5.3848	5.52586	4.86575	5.16115	5.8515
A_52_P249424	10.0873	9.89594	10.6943	10.4241	10.0296	10.5194	10.5285	10.0998	9.96841	9.82852	10.0105	10.1815
A_30_P01021325	9.7163	9.64684	9.52575	9.21065	9.32176	9.83525	9.22528	9.4313	9.79277	9.41519	9.73448	9.34492
A_52_P73126	3.77153	3.46357	3.87348	4.22483	3.2962	3.59872	4.02886	5.81031	4.33616	6.96663	3.92188	4.20541
A_55_P1952828	9.43829	9.43704	9.21652	9.36812	9.79409	8.84911	8.94736	9.38521	9.4166	9.22136	9.7691	9.83584
A_55_P2009817	3.03532	3.41368	6.84902	3.63304	4.33913	3.92979	1.08373	4.07952	4.13531	4.70219	5.78873	4.58686
A_55_P2162204	11.4298	11.1925	11.0517	10.8659	10.6834	11.556	11.0779	10.8962	11.2175	10.7623	11.1353	10.6675
A_55_P2031811	3.2962	2.57247	3.92584	3.32048	4.01405	2.66067	4.02886	3.92979	3.20788	4.25033	3.49056	4.02517
A_55_P1993323	4.26915	4.28466	4.22162	3.87758	4.19232	3.98398	3.63787	4.48585	3.36199	4.02886	4.6239	3.2962
A_55_P1964737	4.26915	3.77592	5.36743	3.5118	4.01405	3.59872	3.69932	4.90038	3.57873	4.02886	4.47238	4.11811
A_30_P01023213	4.12845	2.4458	5.21716	3.95326	4.10768	4.02886	4.12845	4.63362	4.10069	4.40304	4.7091	4.37434
A_55_P1957865	4.45877	4.61902	5.21716	4.04716	4.64808	4.49388	3.92584	5.90765	4.2629	5.21555	5.60085	4.4478
A_52_P289685	11.1173	11.0911	11.2287	11.0286	10.8555	11.3853	11.1862	11.0783	11.0596	10.9436	11.086	10.8879
A_52_P346113	8.28198	8.04012	8.07921	7.89678	8.45374	8.5276	7.77252	7.85038	8.11043	7.83467	8.03429	8.09842
A_55_P2294059	5.29884	5.16283	6.27826	5.47946	5.63512	5.82841	5.04941	5.90765	5.24438	5.53496	5.86187	5.71282
A_51_P115374	4.38013	4.45877	4.05441	4.04716	3.961	3.59872	3.8234	4.28466	4.47238	4.4478	5.78873	4.02517
A_55_P1959041	3.14131	3.26528	4.22162	2.91296	4.13531	3.98398	3.44713	4.52293	3.44161	4.37434	4.69293	4.20541
A_55_P2022663	14.246	14.2782	13.9246	14.1839	14.2834	14.0014	13.9609	14.2635	14.2324	14.1334	14.2113	14.2782
A_51_P369784	3.92584	3.77592	3.97827	3.82764	4.10768	3.72228	4.3	4.40019	4.53853	3.83187	5.54787	3.75826
A_51_P211854	7.00036	7.57515	7.2399	6.81525	6.97573	7.21422	6.68869	7.6753	7.14922	6.85318	6.79861	6.47354
A_30_P01018426	3.8234	3.77592	4.40871	4.22483	4.7068	3.20788	3.36783	3.69469	2.96007	3.67129	4.93026	4.11811
A_30_P01028912	6.42749	6.2406	7.01437	5.90264	5.97848	6.06138	5.39197	5.62785	6.15799	6.0469	6.06498	5.54401
A_55_P2406802	3.2962	3.41368	3.57873	3.57873	4.10768	2.86426	3.87758	3.85283	3.62818	3.71772	3.32048	3.75826
A_30_P01023351	3.36783	3.98398	4.22162	3.72683	3.76712	3.68069	2.96777	3.69469	4.01033	2.12599	3.94937	3.81489
A_55_P2086203	6.64911	6.25011	6.14997	5.5498	6.04235	6.41557	6.45448	6.35076	6.50565	6.36542	6.57476	6.12391
A_52_P122822	5.96603	5.47946	5.78	5.98276	5.66505	5.71854	5.46592	7.09221	5.6745	5.39911	5.45088	6.42959
A_30_P01029138	4.8154	4.91041	5.21716	4.38876	4.73867	4.65525	4.83975	5.4982	4.72055	4.86575	4.96916	5.26797
A_55_P2164503	5.69437	5.37179	5.31554	5.5498	6.45173	5.4982	5.49953	5.70938	5.43568	5.45637	5.50284	5.54401
A_55_P2127265	14.7687	15.0771	15.5584	15.1088	14.5697	15.5972	15.792	15.114	15.3265	15.2515	15.0343	14.852
A_55_P2004821	4.52554	4.07596	4.63846	4.20215	5.12543	4.07596	4.3	6.12434	4.47238	4.4478	4.88622	4.96339
A_55_P2046096	4.79172	4.69988	4.05441	4.22483	4.33913	4.38876	3.92584	4.85541	4.87602	4.7588	4.7091	4.02517
A_55_P2183592	5.18117	4.83449	5.63875	5.1323	4.95179	5.21555	5.12887	5.86187	5.66505	5.21555	5.78873	5.58215
A_55_P2101137	4.08307	3.26528	4.37724	4.45877	4.76102	3.98398	4.21516	6.10133	4.13531	4.07596	6.6164	4.99578
A_55_P2037689	10.6469	10.8819	11.6281	11.1983	10.6668	11.5602	11.7304	10.8427	10.967	10.6794	10.3293	10.5015
A_51_P257065	8.07275	8.41737	8.3151	7.98602	8.16339	8.30373	8.15961	8.32975	8.28487	8.46884	8.46739	8.23337
A_55_P2039225	8.91635	8.76346	9.91163	9.19699	8.44859	9.69539	9.70957	8.64532	9.0119	8.66471	8.54509	8.02969
A_30_P01020434	6.1196	5.99695	6.14997	5.99883	6.1487	6.12133	6.07571	6.51225	6.06498	6.23423	6.36104	6.17056
A_30_P01022682	4.02886	4.3212	4.45055	4.3272	4.51243	3.59872	4.17246	4.82392	4.01033	4.4478	5.00517	4.40304
A_30_P01025405	5.79632	5.49687	5.78	5.60085	5.4808	5.52716	5.60085	5.70938	5.25701	5.70938	5.32607	5.74232
A_55_P2056393	7.98341	7.85844	7.45061	7.50524	7.72075	7.86619	7.45302	7.87364	8.06019	7.74701	8.10978	7.65844
A_30_P01024859	3.51706	3.41368	3.97827	2.19325	4.01405	3.88573	3.44713	6.01287	4.01033	3.09282	3.44161	4.02517
A_55_P1976829	5.18117	5.62785	5.59091	5.8421	6.28329	5.39626	5.23164	5.65494	5.37324	5.5934	5.53237	6.44139
A_66_P111781	9.07015	8.87917	9.00817	9.46869	9.14819	8.6869	8.72576	8.9312	8.93403	9.154	8.95671	9.28229
A_30_P01029062	7.38757	7.78239	8.30772	8.09182	8.14163	7.68643	7.88602	8.02405	7.60355	7.97005	7.99489	7.81559
A_52_P505157	5.47811	4.86162	5.57587	4.79606	5.2742	5.55556	5.72424	5.54014	5.43568	5.00517	4.96916	5.50218
A_66_P140507	6.64911	6.61518	6.55059	6.64191	6.71353	6.56907	6.36724	6.82695	6.67875	6.44692	6.64851	6.68402
A_30_P01027633	3.36783	3.77592	6.47625	4.01405	4.81327	3.83187	4.07952	4.57934	3.94937	3.59375	5.29425	3.92584
A_52_P157450	6.34634	6.48701	6.6916	6.05054	6.29367	6.99282	6.78287	6.68578	6.57539	6.4	6.47354	6.00446
A_55_P2013143	5.36743	4.69988	5.31554	5.21878	5.2742	5.52716	5.51407	6.2406	4.96339	5.21555	4.66476	5.20418
A_55_P1954693	3.44713	3.59375	3.75826	3.82764	5.08704	2.86426	3.7627	3.20788	2.75274	2.58254	3.92188	3.14131
A_30_P01024384	3.2962	3.77592	3.97827	3.32048	3.70394	3.72228	4.02886	4.63362	3.44161	2.58254	4.20215	5.46592
A_52_P367520	11.4668	11.5804	11.0131	11.2469	11.546	10.9563	10.9712	11.6205	11.5929	11.609	11.6547	11.5487
A_30_P01018306	6.32924	6.03778	6.71296	6.55827	6.62739	6.29902	5.94326	6.25955	6.19292	6.49503	6.30436	6.44139
A_52_P118560	3.14131	2.91296	5.0033	3.68537	2.92883	3.20788	3.14131	4.87807	3.14131	3.32048	5.35866	3.2962
A_52_P1087486	3.70394	3.88166	3.81489	4.09014	4.26915	3.83187	3.8234	5.88698	3.62818	4.37434	5.47676	4.4478
A_55_P2010962	9.83373	9.83373	9.49442	9.76485	9.88072	9.83129	9.58314	9.8796	9.98322	10.0209	9.96652	10.0393
A_30_P01033293	2.95232	3.41368	4.5437	3.63304	3.8234	3.83187	3.87758	4.43117	3.62818	3.16161	4.34506	3.57873
A_51_P359549	7.58175	7.67765	7.73577	7.9037	7.57057	7.61999	7.46718	7.66289	7.74785	7.46548	7.47869	7.48608
A_55_P2051592	9.14447	9.17885	9.7208	9.35441	9.12313	9.78836	9.58095	9.27707	9.2821	9.22669	9.21242	9.09438
A_55_P2110081	12.6605	12.7255	13.1972	13.132	12.5012	13.0599	12.9649	12.4988	12.5832	12.5139	12.4159	12.5293
A_51_P454993	5.96603	6.42959	6.06498	6.2222	6.2406	6.1402	6.01937	6.29673	6.53512	6.44139	6.2883	6.33819
(+)E1A_r60_1	17.5448	17.645	17.7062	17.6603	17.6915	17.5109	17.6603	17.5697	17.5448	17.6498	17.4741	17.6915
A_51_P382512	5.93247	5.74007	5.67332	5.7909	5.97848	5.89558	5.64717	6.17139	5.88036	5.87729	5.7974	5.8515
A_51_P187171	11.4942	11.4319	11.4084	11.5876	11.5743	11.4954	11.5011	11.5454	11.4311	11.5037	11.4471	11.6754
A_55_P2142575	3.2962	3.67129	2.75274	4.20215	3.92188	-0.170805	2.75274	3.69469	3.80632	3.16161	3.02058	3.69932
A_55_P1968593	4.30305	4.52554	3.87348	4.79606	5.36597	4.75435	4.83975	4.87807	4.59931	4.78955	5.12887	5.30797
A_55_P2237129	5.86239	5.53885	6.12822	5.21878	5.88036	5.38047	5.27497	5.42032	6.1668	5.56702	6.21007	6.10395
A_55_P2146847	3.98398	4.38876	4.66476	4.04716	5.30949	4.42838	4.42838	4.82392	4.10069	4.60427	6.08637	3.44713
A_55_P2372528	4.58686	4.16577	5.4048	4.57682	4.95179	4.28002	4.02886	4.9939	4.66239	4.93813	6.13977	6.27826
A_55_P2141876	10.2473	10.2035	11.2841	10.9932	10.577	10.958	11.2711	10.4061	10.5343	10.347	10.1174	10.3356
A_55_P2091676	10.4675	10.7404	10.463	10.5915	11.1498	10.5087	10.2302	10.7981	10.9954	11.0129	10.7716	10.7676
A_55_P2163682	6.08016	5.98276	6.395	6.24219	6.40993	6.44485	6.27826	6.87639	6.63436	6.35847	6.30436	6.08193
A_55_P2136765	13.1999	13.1755	13.7227	13.4047	13.1061	13.7066	13.635	13.145	13.0404	13.0911	12.7986	13.0098
A_51_P369516	10.8314	10.9982	10.7346	10.8403	10.9004	10.6814	10.744	10.8548	10.779	10.9009	10.8706	11.0629
A_52_P155708	7.38218	7.62472	7.48525	7.4891	7.35856	7.52609	7.75982	7.43281	7.55675	7.78443	7.21887	7.45182
A_52_P352563	13.4625	13.6851	13.3573	13.6592	13.7121	13.2593	13.3673	13.7076	13.4115	13.6695	13.5052	13.7103
A_52_P188042	3.8234	3.67129	4.30305	6.03595	4.57682	2.96777	4.4615	3.69469	4.13531	4.02886	5.00517	3.75826
A_51_P334789	8.31774	8.4112	8.45666	8.50635	8.36518	8.24995	8.59724	8.62636	8.18027	8.41895	8.60398	8.5196
A_52_P682990	10.1933	10.2302	10.5456	10.5648	10.2633	10.469	10.4491	10.1997	10.2589	10.3051	10.178	10.2355
A_30_P01031369	3.92584	3.55846	3.97827	3.68537	4.13531	3.20788	4.38876	3.58375	3.57873	2.81386	4.31518	4.37434
A_52_P534235	5.13914	4.58686	4.57934	4.6906	4.95179	5.32457	5.04941	4.87807	4.18903	4.9144	4.52554	4.96339
A_30_P01032656	4.67891	4.3212	4.80684	5.17785	4.88419	4.11811	4.42838	4.94984	4.57682	4.7588	6.93946	4.82604
A_55_P2157809	3.03532	4.16577	3.50652	3.32048	4.10768	4.02886	3.92584	3.38519	3.69469	3.59375	4.20215	4.29081
A_55_P1969792	3.8234	4.07596	4.45055	4.65764	4.33913	3.98398	3.7627	4.13873	3.69469	4.02886	4.88622	3.98017
A_30_P01019480	4.76102	4.86162	6.206	4.63846	5.08704	5.04941	4.66476	4.04351	4.80469	4.81327	4.66476	4.85541
A_30_P01021978	4.48585	4.12156	3.57873	4.20215	4.01405	4.35977	4.12845	5.13572	4.66239	4.64087	5.22683	4.68477
A_55_P2113633	9.13226	9.03809	9.24196	9.23838	9.41976	9.36985	9.05695	9.01137	9.1161	9.33094	9.2076	9.36776
A_30_P01019682	3.92584	4.16577	3.87348	3.78903	4.01405	3.68069	4.21516	3.69469	4.4478	3.87758	4.47238	3.92584
A_30_P01028354	4.08307	3.26528	4.22162	4.20215	3.70394	2.43473	2.75274	4.20867	3.50652	4.12156	5.57523	3.75826
A_30_P01032080	3.44713	3.41368	3.63787	3.16161	3.58375	2.43473	3.7627	3.58375	3.69469	3.32048	5.29425	3.2962
A_55_P2111713	10.3019	10.2867	10.3617	10.8535	11.0461	9.93515	10.483	10.3818	10.123	10.5618	10.3281	10.9164
ETG04_27747	4.30305	3.59375	4.30305	3.87758	4.19232	4.11811	3.44713	3.90592	4.37724	3.46357	4.66476	3.44713
A_55_P1954501	4.48585	5.08704	5.15272	5.17785	5.25701	5.25228	5.41046	5.26485	5.00517	5.29118	5.77672	5.33205
A_55_P1958996	4.45877	5.08704	5.70651	4.57682	4.81327	4.11811	4.17246	4.52293	4.75212	3.92979	5.4329	3.92584
A_55_P2058143	6.39715	6.51882	6.79996	7.07715	6.78013	6.67758	7.54939	6.72096	6.13935	6.72381	5.69204	6.33819
A_55_P2057803	7.81665	8.02405	7.55035	8.22315	8.13683	6.97573	7.60262	7.73985	7.38829	7.99971	7.80568	7.99465
A_55_P2122135	5.29884	5.49687	5.46999	5.1323	5.42032	4.49388	5.04941	5.54014	4.96339	5.49953	4.95179	5.39054
A_55_P2117993	5.76902	6.18468	6.22702	6.78068	6.87281	5.58341	5.96555	5.92061	5.80602	6.25955	5.29425	6.51225
A_30_P01032301	5.222	5.61196	6.29367	5.9559	6.31346	5.75907	5.46592	6.39	5.46592	5.83369	5.30949	6.14445
A_55_P2159685	4.58686	4.28466	4.30305	4.6906	5.12543	4.35977	4.96916	5.51012	3.69469	4.02886	4.73867	4.29081
A_55_P2024468	5.09761	5.3848	5.21716	5.20255	5.04578	5.32457	5.60085	5.66623	4.9939	5.07639	4.47238	5.30797
A_30_P01029181	3.70394	3.32048	4.30305	3.78903	3.8234	3.83187	4.12845	3.69469	4.10069	4.12156	4.22162	4.02517
A_30_P01025233	6.64191	6.9933	7.27952	7.4648	7.57562	6.45927	7.121	6.92222	6.29902	6.85734	6.4	7.42513
A_55_P2186978	7.73549	6.51882	7.91731	6.44967	4.26915	4.63241	6.32024	6.56018	5.55044	4.57682	5.50284	4.37434
ERCC-00085_231	3.58124	3.55846	5.0033	3.95326	3.8234	3.88573	3.36783	3.38519	3.36199	3.32048	3.99155	4.11811
A_55_P2026903	3.44713	3.67129	5.88748	3.32048	3.44713	3.78903	4.52815	3.92979	3.57873	4.07596	3.99155	4.3272
A_51_P423091	10.4887	10.8369	10.6426	10.6428	10.6851	10.4185	10.7303	10.9362	10.7839	10.991	10.7942	10.9353
A_55_P1970494	4.38013	4.52554	4.69988	5.03665	4.33913	3.59872	4.3	4.3421	3.2962	4.20541	5.90264	3.98017
A_30_P01028599	4.55397	4.75658	4.69988	4.74092	4.7068	4.69293	4.66476	4.7091	4.85541	5.19272	4.75658	4.93813
A_55_P1971774	3.44713	3.26528	4.10768	4.12845	1.19539	3.2962	4.38876	3.38519	4.18903	3.92979	3.83187	3.75826
A_52_P582555	6.81151	6.83065	6.64491	6.87075	6.67287	6.46404	6.23901	6.42679	6.56082	6.66074	6.64191	6.62739
A_55_P2015842	5.24438	5.23483	5.17119	5.15441	5.23643	4.88419	5.25701	5.51012	5.29425	5.29118	5.26172	5.48215
A_52_P101982	9.90318	9.94409	9.93668	9.799	9.83666	9.93242	9.7153	9.91919	9.85729	9.99216	9.96137	9.98908
A_51_P498720	10.0831	10.4669	9.76313	10.2566	10.2304	9.58408	9.70042	10.2715	9.59096	10.176	10.0031	10.3062
A_55_P2141817	3.70394	3.92979	3.50652	3.92584	4.01405	3.83187	4.63846	6.81258	3.74935	3.16161	4.12845	4.11811
A_55_P2094019	3.8234	3.77592	3.75826	3.00569	4.01405	3.06436	3.69932	5.60085	3.57873	3.59375	2.75274	3.44713
A_51_P187679	3.77153	4.16577	4.57934	3.78903	4.85955	4.42838	4.02886	4.37724	4.53853	3.77153	4.88622	4.58686
A_55_P2013775	3.92584	4.64087	4.22162	4.3627	4.73867	4.63241	3.57873	4.96532	4.2629	4.20541	4.6239	4.58686
A_30_P01030871	5.61073	5.23483	5.60827	5.00984	5.73669	5.36013	4.9479	6.55699	5.20906	5.39911	5.42173	5.58215
A_55_P1975685	8.81	8.70847	8.86428	8.39066	8.51706	9.01143	8.66663	8.6771	8.76932	8.3869	8.55519	8.23856
A_51_P509223	7.48943	7.77637	7.41794	7.08868	7.44217	7.64649	7.53228	7.94612	7.7695	7.34236	7.9356	7.59813
A_66_P110817	8.45837	8.57534	8.64517	8.37155	8.50345	8.44885	8.22737	8.4888	8.47907	8.37191	8.36828	8.35833
A_55_P1994688	4.38013	4.48853	4.05441	4.3272	4.19232	4.49388	3.69932	3.92979	3.57873	4.20541	4.31518	3.69932
A_30_P01027250	4.52554	3.98398	4.72283	3.92584	4.22162	4.85541	4.38876	4.82392	3.84866	4.37434	4.57682	4.68477
A_55_P2010936	7.63927	7.75982	7.57641	7.47058	7.44975	7.56534	7.71188	7.73379	7.57798	7.60216	7.77664	7.6857
A_30_P01031995	3.92584	3.77592	4.48317	3.78903	4.64808	3.59872	3.69932	4.40019	3.84866	4.37434	4.28774	3.44713
A_55_P2178094	4.08307	3.55846	4.10768	3.78903	2.4458	4.07596	3.04991	2.66067	3.44161	4.12156	3.02058	3.81489
A_52_P109319	6.79915	6.77026	6.5589	6.1855	6.40993	7.1604	6.57476	6.65449	6.67287	6.73203	6.64851	6.62739
A_55_P2159780	5.61073	5.49687	5.71854	5.42453	5.34837	5.39626	5.31403	5.61319	5.22522	5.53496	5.39126	5.22522
A_52_P357611	7.33195	7.24941	7.35085	7.07715	7.26669	7.07715	6.90225	7.50606	7.45559	7.0878	7.25572	7.06531
A_66_P131896	4.30305	2.91296	3.81489	3.26528	4.13531	3.83187	3.50652	3.69469	3.90993	3.71772	3.59375	4.37434
A_51_P358894	4.12845	4.3212	3.97827	4.12845	4.26915	4.35977	4.02886	3.69469	4.72055	3.46357	3.65706	3.5118
A_55_P2184889	4.58686	3.67129	5.0033	3.78903	3.961	4.28002	2.48927	4.3421	3.44161	4.29081	3.94937	4.80469
ERCC-00043_129	4.02886	3.32048	5.60827	5.00984	3.58375	3.68069	2.48927	3.58375	4.37724	4.07596	4.80469	3.69932
A_30_P01028295	4.58686	3.77592	4.51769	3.87758	4.64808	4.72055	4.3	4.37724	4.04716	4.37434	5.98466	4.7091
A_30_P01017931	5.39769	5.7909	5.88748	5.36159	5.97848	5.63754	5.37179	5.76902	5.63512	5.93738	5.71282	5.42872
A_55_P2003333	3.2962	3.10684	6.43307	3.00569	5.04578	2.12599	3.44713	4.04351	2.24488	4.40304	3.16161	5.6792
A_51_P120461	9.24879	8.80773	9.09899	8.69142	8.7293	9.09438	9.13247	9.00682	8.99474	8.84271	8.83536	8.77914
A_55_P1983523	8.25616	7.91146	8.86905	8.05658	8.2814	8.40678	8.72859	8.52972	8.75137	8.37454	8.52744	8.515
A_55_P2045855	5.05485	5.34246	4.91041	4.6906	4.33913	4.69293	4.3	4.4615	4.77645	5.25544	4.69293	4.40304
A_30_P01018669	3.92584	2.18004	3.50652	3.32048	5.20255	3.2962	2.48927	3.47443	2.49994	3.46357	3.1138	4.37434
A_55_P2186395	5.95493	5.4329	5.50549	5.17785	6.5659	5.57208	5.60085	6.18963	5.89659	5.60827	5.49553	6.94971
A_51_P165182	7.18519	7.15556	7.11016	6.87075	6.6916	7.1471	7.48205	7.38073	7.06733	6.97883	6.8537	7.02872
A_52_P418644	11.5331	11.7285	11.1412	11.3215	11.3256	11.152	11.2607	11.6001	11.4204	11.4298	11.6205	11.5226
A_55_P2082050	8.26068	8.77338	8.77914	8.57061	8.42692	8.44885	8.52483	8.50709	8.62689	8.71213	8.88032	8.83154
A_30_P01028807	5.13914	5.23483	5.67332	5.08438	4.76102	5.47946	5.56828	5.45363	5.11159	5.7909	4.96916	5.13572
A_51_P240269	4.79172	4.58686	4.22162	4.45877	4.76102	5.0033	4.81327	4.73416	4.77645	5.00517	4.77645	5.58215
A_51_P134007	12.2768	12.4017	12.0423	12.0281	12.0929	12.0983	12.0906	12.4926	12.41	12.1689	12.6468	12.2773
A_55_P1973264	4.02886	3.77592	3.87348	4.12845	4.05441	3.92979	3.69932	4.18903	3.84866	4.02886	4.28774	4.06881
ERCC-00057_123	2.71203	2.69821	4.22162	4.04716	2.69821	3.72228	3.36783	3.38519	1.88705	3.71772	2.85598	3.75826
A_30_P01020828	4.42279	4.61902	4.30305	4.45877	4.40588	4.77645	4.7251	5.11852	4.33616	4.70219	4.6239	6.10395
A_30_P01029870	4.18242	4.07596	4.51769	3.72683	4.4478	3.56356	3.8234	4.20867	4.40588	3.92979	4.06522	5.50218
A_55_P2194798	4.21516	4.45877	4.72283	3.57873	4.90239	4.97873	4.34506	4.63362	4.53853	5.11506	4.31518	4.7091
A_30_P01017929	3.70394	3.55846	3.97827	3.00569	5.66505	3.47443	2.19325	4.20867	3.57873	4.02886	4.52554	4.02517
A_30_P01023419	4.12845	3.10684	4.63846	4.01405	4.81327	3.92979	3.44713	4.20867	2.96007	4.02886	4.75658	4.02517
A_55_P2057984	7.87056	7.83678	7.61249	7.40878	7.5189	7.69574	7.44872	7.79854	7.91868	7.67647	7.97889	7.61003
A_55_P2170094	8.19901	8.25084	8.38384	8.31718	8.1681	8.12923	8.2963	8.3912	8.43788	8.30678	8.64066	8.28092
A_55_P2118694	6.79483	7.1324	6.36104	6.49102	6.50764	5.83895	6.45448	7.53585	6.6413	6.70549	7.70873	6.62739
A_52_P223524	5.36743	5.52716	6.18468	5.03665	4.93026	5.66623	5.27497	5.62785	5.78655	5.49953	5.7042	5.13572
A_30_P01023275	3.70394	4.16577	4.51769	3.78903	5.15947	3.20788	2.75274	4.01405	2.65113	3.98398	4.75658	3.92584
ERCC-00025_93	2.85182	3.83187	3.2962	3.45811	6.39358	3.68069	3.69932	3.47443	3.69469	3.09282	4.20215	4.02517
A_55_P2009013	10.6393	10.7384	10.7044	10.5045	10.5425	10.702	10.3965	10.908	10.6876	10.6143	10.8158	10.6527
A_55_P2020592	7.95559	8.33386	8.10804	7.92957	8.05342	8.07743	8.02923	8.83009	8.34036	8.26498	8.64877	8.27608
A_30_P01023676	4.64568	4.38876	4.95567	3.87758	4.99578	4.83238	4.52815	5.04941	4.80469	7.09924	5.30949	4.6239
A_66_P126110	4.55397	3.71772	5.17119	3.78903	4.78738	3.72228	3.98398	4.3421	3.84866	4.4478	5.94228	4.58686
A_51_P365859	3.77153	3.77592	4.34506	3.45811	4.58936	3.20788	3.14131	4.48585	4.01033	3.92979	4.73867	4.58686
A_55_P2004283	3.92584	3.55846	4.22162	3.72683	4.4478	4.63241	3.14131	4.43117	3.44161	4.29081	4.10768	4.11811
A_30_P01032262	4.45877	4.52554	4.63846	4.6906	5.04578	4.69293	3.8234	4.40019	4.77645	4.86575	4.20215	4.82604
A_55_P2010197	5.0888	5.20255	6.02768	5.00984	5.58966	5.4982	5.07994	5.35132	4.66239	5.32607	5.37324	5.63512
A_66_P100113	3.77153	4.07596	4.10768	4.04716	4.6239	3.59872	3.63787	5.29884	4.13531	3.98398	4.2629	3.92584
A_55_P2093528	3.14131	3.55846	3.50652	3.57873	4.53075	3.78903	2.63187	6.16261	3.44161	3.92979	4.52554	4.40304
A_55_P2041514	3.2962	2.80528	4.26915	3.87758	5.30949	4.02886	2.96777	4.25033	3.74935	2.99819	3.16161	4.25033
A_55_P1962329	3.2962	3.59375	6.29367	3.95326	5.54787	3.36199	2.19325	4.40019	3.62818	3.87758	3.99155	4.40304
A_30_P01022189	2.95232	3.41368	3.81489	2.63187	3.76712	2.66067	3.36783	3.92979	3.80632	3.59375	3.65706	3.21438
A_52_P543792	5.94521	6.2222	5.74904	5.7646	6.32325	6.17139	5.99507	6.20519	6.12477	6.11353	6.4	6.33819
A_51_P502764	8.3806	8.44256	8.61099	7.7892	8.02658	8.76062	8.4358	8.59008	8.4318	8.25419	8.66174	8.25301
A_55_P2076215	2.95232	1.31303	2.64153	2.82238	6.13807	2.75274	1.69707	4.52293	2.40098	2.81386	4.12845	3.5118
A_51_P170565	3.14131	3.26528	2.85598	2.63187	4.64808	3.06436	3.44713	5.42032	2.11215	3.83187	2.43473	3.57873
A_30_P01032871	4.48585	3.41368	5.978	4.09014	4.33913	4.4615	3.87758	4.07952	4.01033	4.29081	3.83187	4.37434
A_51_P237106	4.08307	4.07596	4.13873	3.45811	4.19232	3.06436	3.92584	4.78302	4.59931	3.32048	3.65706	4.29081
A_30_P01030751	5.33354	5.49687	5.54014	5.47946	5.49953	5.4329	5.14255	5.63754	5.37324	5.93738	5.69204	5.88036
A_52_P518270	4.45877	4.35977	5.0033	4.38876	4.58936	4.11811	4.3	5.21231	4.22162	6.93799	4.6239	5.26797
A_30_P01029534	4.79172	4.75658	4.45055	4.79606	5.39911	4.69293	4.38876	5.6792	3.80632	3.92979	4.42838	5.50218
A_30_P01021961	5.76902	5.81566	5.59091	5.63754	6.55954	5.32457	5.7974	6.06946	5.4048	5.90364	5.4048	5.66623
A_30_P01026338	3.70394	4.52554	5.0033	5.46183	5.15947	4.65525	4.63846	4.92037	4.77645	4.7588	7.62442	3.98017
A_30_P01031495	4.48585	4.35977	4.30305	3.45811	4.05441	4.63241	3.92584	6.12434	4.10069	2.58254	4.31518	4.37434
A_51_P115159	12.3174	12.3867	12.4575	12.3524	12.3272	12.5523	12.407	12.2173	12.2591	12.1987	12.1096	12.1769
A_55_P2064721	4.52554	4.58686	4.48317	4.54112	4.76102	4.49388	3.92584	5.28349	4.80469	4.64087	4.86781	4.93813
A_51_P103499	3.87758	3.77592	3.63787	4.04716	4.81327	3.47443	3.98398	6.58731	3.69469	3.71772	6.45995	4.3272
A_51_P197259	12.1943	12.1526	12.0167	12.2091	12.2037	12.1811	12.1709	12.3236	12.2524	12.3081	12.3902	12.32
A_51_P520927	10.4295	10.3341	10.2234	10.4026	10.3931	10.2389	10.1601	10.3944	10.3359	10.332	10.4056	10.4476
A_51_P102122	-0.033168	-0.170805	4.13873	2.47853	3.20788	1.95058	0.036544	3.14131	3.62818	2.81386	2.85598	2.85598
A_30_P01025481	3.77153	3.26528	4.72283	4.12845	4.19232	3.83187	4.57682	4.85541	4.22162	4.37434	5.26172	4.4478
A_55_P2075449	4.86781	5.37179	5.67332	5.4982	5.30949	5.13401	5.07994	5.57082	5.0888	5.56702	5.30949	5.60085
A_55_P2141093	9.61419	9.57934	9.31565	9.22352	9.58228	9.48782	9.45419	9.66606	9.78264	9.39225	9.51173	9.6762
A_52_P399095	8.18359	8.65698	7.88564	8.27647	8.44601	8.0237	7.93609	8.62719	8.05658	8.41367	8.40448	8.173
A_52_P413492	8.62582	8.80638	8.7334	8.75109	8.85652	8.79432	8.7914	9.04829	8.75297	8.85256	9.00992	8.98261
A_52_P269158	9.49142	9.42633	9.17739	9.12754	9.05864	9.01452	9.10009	9.55273	9.26001	9.1699	9.30618	9.30751
A_55_P2077548	9.89818	10.0432	9.79954	9.67594	9.87797	10.1254	9.81203	9.79203	9.87288	9.89423	10.1213	9.97571
A_55_P2008895	6.61333	6.61518	6.79483	6.75197	6.45173	6.07749	6.48701	6.78614	6.35921	6.51291	6.56018	6.49102
A_65_P20433	5.01078	4.52554	4.91041	4.16242	3.92188	4.02886	3.57873	4.57934	4.01033	4.29081	5.37324	4.76544
A_51_P123314	4.99578	4.78302	4.6092	5.1323	5.15947	5.41611	4.9479	5.42032	5.1323	4.93813	5.22683	5.6792
A_55_P1962503	2.95232	1.31303	4.05441	3.32048	4.10768	3.83187	3.44713	3.85283	2.85598	3.16161	4.12845	3.81489
A_30_P01030152	4.21516	4.24716	5.0888	3.68537	4.26915	4.31518	4.12845	4.63362	4.18903	4.02886	4.57682	4.37434
A_55_P2002849	6.58669	6.38209	6.59044	6.69972	6.28329	6.70837	6.60286	7.1058	6.84118	6.6041	6.66401	6.02029
A_55_P2066207	3.2962	2.69821	3.63787	3.32048	3.70394	3.88573	3.50652	4.13873	3.57873	3.59375	3.32048	4.29081
A_51_P117226	8.42596	8.23207	8.42954	8.21892	8.1594	8.57187	8.08962	7.85038	8.04798	7.74013	7.83914	7.80783
A_66_P118091	6.84118	6.55954	6.77246	6.92321	6.87997	6.69102	6.71124	6.88761	6.91027	6.66074	6.73118	7.43402
A_55_P2027327	8.92682	8.8946	8.64877	8.90886	8.97247	8.80759	8.5315	8.64051	9.00881	8.74382	8.79668	8.82015
A_51_P486308	4.64568	4.61902	5.57587	5.1323	4.85955	4.63241	4.83975	5.45363	4.80469	4.4478	5.50284	4.93813
A_51_P100776	5.82735	5.28965	5.50549	5.71854	5.57587	5.4329	5.66505	6.10133	5.71282	5.62541	5.58716	5.88036
A_30_P01024249	3.87758	3.26528	3.97827	3.78903	4.10768	4.02886	3.2962	4.20867	3.69469	2.58254	4.52554	3.92584
A_30_P01029126	5.82735	5.90464	6.38209	6.2222	5.90464	5.85046	5.94326	5.60085	5.63512	5.92853	5.53237	6.14445
A_52_P383089	4.08307	4.80684	4.40871	4.99201	4.99578	4.75435	4.9479	5.09409	4.33616	5.09057	4.52554	5.04578
A_52_P275649	4.21516	3.10684	4.75658	4.3	3.58375	4.69293	3.2962	4.96532	3.80632	3.71772	5.66623	4.20541
A_52_P479269	8.69483	8.4479	8.36172	8.57613	8.9968	8.63885	8.52695	8.66145	8.80396	8.47831	8.62171	8.73376
A_55_P2005930	11.7142	11.6855	11.5127	11.8495	11.8252	11.3758	11.471	11.7627	11.5786	11.5414	11.4127	11.7515
A_55_P2034979	5.0888	4.93026	5.21716	5.27885	5.51538	5.29118	5.23164	5.54014	5.27575	5.3848	5.26172	5.22522
A_51_P462546	9.40255	9.64098	9.43717	9.39765	9.58674	9.39435	9.40791	9.65723	9.50695	9.66543	9.51654	9.71194
A_55_P1978481	12.3353	12.4699	12.2602	12.4014	12.4222	12.2619	12.2783	12.3828	12.3092	12.4784	12.2797	12.4475
A_51_P167292	6.82854	4.83449	7.32109	5.90264	6.04235	6.25955	6.47287	5.84837	6.92519	5.70938	5.16115	5.61564
A_30_P01027647	5.222	5.16283	5.23483	5.5498	6.0286	5.0033	5.09761	4.87807	5.11159	5.53496	4.57682	5.50218
A_30_P01022702	5.0888	4.97491	4.37724	4.81967	5.54787	5.15441	5.27497	5.47946	5.00517	5.30797	5.34394	5.54401
A_30_P01031906	5.87422	5.26953	5.55939	5.3848	5.78981	5.61196	5.69321	5.93148	5.18943	5.87729	6.17971	6.90877
A_30_P01023834	2.47853	4.07596	4.05441	3.82764	3.2962	4.20215	3.14131	4.28466	4.10069	3.92979	3.59375	4.02517
A_30_P01027628	8.7298	8.6888	8.823	8.79289	8.7753	8.51935	8.63674	8.93832	8.70127	8.64667	8.80638	9.02776
A_55_P2174646	3.14131	2.91296	3.63787	3.32048	3.58375	3.78903	3.57873	4.40019	3.44161	2.58254	4.12845	4.02517
A_66_P123683	6.62068	6.57916	7.2231	6.48029	6.48096	7.54134	7.2403	6.33372	7.07046	6.40745	6.15124	6.00446
A_55_P1999765	3.65229	3.98398	3.75826	3.68537	4.05441	4.11811	2.96777	4.73416	3.94937	3.67129	3.87758	5.77012
A_51_P146044	7.34587	7.43802	6.89672	7.05087	7.27234	6.7675	7.02503	7.477	7.2882	7.44217	7.50606	7.77005
A_30_P01029988	3.8234	4.07596	4.22162	4.99201	4.22162	4.11811	2.96777	4.63362	3.80632	4.40304	4.6239	4.65287
A_52_P601782	2.47853	3.55846	5.70651	2.08408	3.70394	3.47443	2.75274	4.28466	4.10069	3.09282	3.59375	4.20541
A_51_P117739	10.974	10.8892	10.4032	10.547	10.5966	10.4242	10.9911	11.3256	11.3833	11.2891	11.4537	11.4317
A_30_P01030578	7.14137	7.22832	7.30749	7.32858	7.62685	7.44631	7.28762	7.3958	7.32484	7.48205	7.34495	7.59813
A_55_P2142430	5.4632	5.23483	6.62921	5.36159	5.30949	5.4329	6.06363	5.93148	5.66505	5.65196	6.93946	5.88036
A_51_P175232	8.75416	8.77214	8.98593	8.73326	8.86235	8.75485	8.78317	8.75304	8.79736	8.80423	8.70272	8.61972
A_30_P01024144	5.74232	6.01844	6.37051	5.88748	6.77301	5.99883	6.01937	6.05054	5.80602	6.02399	5.86187	6.58669
A_51_P102911	2.60248	2.69821	3.81489	4.01405	4.22162	3.83187	3.69932	3.32048	4.57682	3.59375	3.99155	5.6792
A_51_P198076	11.0817	11.199	11.3194	11.3663	11.2384	11.3737	11.3596	11.1664	11.2433	11.2314	10.9931	11.276
A_51_P100997	4.58686	4.64087	5.34985	5.5498	5.76128	4.95567	4.3	4.87807	4.72055	5.39911	5.21231	5.42872
A_55_P2212503	3.70394	4.02886	4.05441	3.92584	4.6239	4.56671	3.44713	3.26528	3.2962	4.20541	4.20215	4.11811
A_55_P2058487	4.02886	4.12156	4.22162	4.57682	4.19232	3.92979	4.12845	4.07952	4.53853	4.9144	4.84708	4.25033
A_51_P116581	9.45988	9.42943	9.37737	9.44128	9.42353	9.35193	9.18133	9.4848	9.55601	9.59174	9.40379	9.48039
A_55_P2424988	5.56702	5.46592	5.29731	5.27885	5.82841	4.85541	5.27497	5.61319	5.0888	5.43568	5.92061	5.77012
A_55_P1959017	5.29884	5.16283	5.36743	6.12521	5.46592	5.39626	5.31403	4.73416	5.07282	5.13487	5.69204	5.74232
A_51_P258766	11.5917	11.6195	11.3548	11.548	11.6669	11.2588	11.2216	11.5155	11.4708	11.5786	11.5097	11.7322
A_30_P01019146	5.553	4.95567	5.60827	6.25641	5.89558	5.21555	5.53237	5.70938	5.80602	6.02399	7.34495	5.74232
A_55_P2032955	4.18242	3.88166	4.51769	4.38876	4.6239	4.4615	4.21516	3.90592	4.18903	4.12156	5.35866	4.11811
A_55_P2121364	4.67891	4.42838	4.63846	5.4982	4.19232	4.97873	4.42838	4.3421	5.04759	4.70219	5.51801	4.47778
A_55_P2076635	9.558	9.51021	9.7349	9.80176	9.78329	9.68488	9.68469	9.63555	9.58185	9.66042	9.5869	9.70389
A_55_P2108948	4.64568	4.93026	6.19661	4.20215	5.4808	4.4615	4.78302	4.40019	4.33616	4.64087	5.7535	4.99578
A_30_P01028229	3.8234	3.55846	5.17119	3.78903	4.33913	4.28002	3.69932	4.57934	3.57873	3.32048	4.93026	2.96007
A_30_P01027151	4.18242	3.88166	4.45055	3.57873	4.19232	3.59872	3.2962	4.82392	2.96007	3.41368	3.65706	2.55212
A_30_P01017636	3.77153	4.16577	3.97827	4.26915	4.40588	3.72228	3.7627	3.55846	3.80632	4.29081	3.75381	4.06881
A_55_P2035613	12.5443	12.3908	12.0239	12.2167	12.4841	12.2202	12.062	12.41	12.58	12.6349	12.6064	12.7224
A_30_P01017439	5.4632	5.67861	5.73669	5.92951	6.48096	5.36013	6.0286	6.52471	5.68739	5.87729	6.02722	5.92951
ERCC-00143_89	3.14131	2.69821	3.69932	3.45811	4.13531	3.72228	4.21516	4.73416	3.80632	4.29081	3.92188	4.20541
ERCC-00074_113	2.47853	2.91296	4.05441	4.12845	3.2962	3.59872	4.38876	4.11811	3.69469	3.87758	3.16161	3.92584
A_51_P286460	3.92584	4.52554	4.51769	4.6906	3.58375	3.92979	4.34506	3.69469	3.36199	3.46357	3.75381	4.20541
ERCC-00138_246	4.30305	3.83187	3.57873	4.3272	4.57682	3.98398	3.92584	3.69469	4.13531	3.92979	4.52554	4.25033
A_55_P1986123	10.3452	10.1616	10.3498	10.4601	10.4579	10.7364	10.3453	10.3139	10.7401	10.4673	10.3796	10.2636
A_30_P01027603	3.58124	3.46357	4.37724	2.82238	3.44713	3.59872	3.92584	2.99819	4.18903	1.7864	3.59375	3.81489
A_52_P93066	8.42299	8.24491	8.09182	8.31718	8.27782	8.19635	7.98175	8.05331	8.1076	8.24907	8.07353	8.16695
A_55_P2138222	8.17363	8.23347	8.57361	8.49723	8.51706	8.35787	8.52483	8.60482	8.14991	8.48193	8.23746	8.67563
A_30_P01033393	3.36783	3.98398	4.40871	4.04716	4.19232	4.35977	4.34506	4.07952	4.22162	4.57682	4.06522	4.58686
A_55_P1980292	9.77295	9.99062	9.80539	10.1	10.0268	9.78332	9.90675	10.1298	9.61108	10.2131	9.9627	10.342
A_30_P01027483	3.92584	3.10684	3.81489	4.04716	3.14131	3.06436	4.12845	3.55846	3.2962	4.12156	4.2629	4.02517
A_55_P2117420	13.855	13.7828	13.7127	13.7986	13.9438	13.6461	13.5316	13.747	13.7376	13.927	13.8959	13.8871
A_30_P01032082	4.12845	3.67129	5.17119	4.04716	4.01405	3.92979	4.21516	4.31215	2.96007	4.29081	4.96916	4.25033
A_30_P01032628	4.96724	5.28965	6.3419	5.53237	5.71854	4.35977	5.60085	6.2222	4.66239	5.48886	5.27885	5.61564
A_30_P01028649	2.71203	3.26528	4.80684	3.78903	4.26915	3.92979	3.2962	7.07493	4.01033	3.16161	2.65113	4.02517
A_55_P2335529	7.63232	7.75982	8.19635	7.92104	7.79719	8.00954	7.73436	7.94612	7.53098	7.61433	7.60355	7.75788
A_66_P120901	10.3996	10.1802	10.3482	10.3051	10.2278	10.2526	10.1443	10.2475	10.4455	10.3947	10.3725	10.3788
A_66_P138009	6.0286	6.34264	6.52927	6.15799	6.39358	6.16093	6.21897	6.17139	5.99035	6.0469	5.71282	6.50035
A_30_P01027808	6.74694	6.9933	7.31204	7.65754	7.52691	6.99282	7.14434	6.89823	6.84118	7.2702	6.69625	7.42513
A_51_P105124	9.91723	9.95461	9.45907	9.60958	9.629	9.37985	9.52273	9.57347	10.0336	9.78496	9.48849	9.89449
A_51_P467410	13.1572	13.2658	12.8726	12.9544	12.9469	13.0689	12.5072	13.2065	13.2502	12.8855	13.1195	13.0193
A_51_P211491	9.99599	9.85501	9.86288	9.73303	9.79088	9.90763	9.81383	10.0293	10.0556	9.81226	10.01	9.88384
A_55_P2301312	7.21786	7.25769	6.9824	6.91675	6.8417	7.2223	6.67287	7.07938	7.42233	6.97382	6.96735	6.85422
A_51_P448664	7.06149	6.601	7.07715	6.15799	6.67875	7.10143	7.29816	7.2126	7.55675	6.93799	7.34495	7.00645
A_51_P394154	8.50445	8.36427	8.42044	8.23706	8.45374	8.60637	8.53572	8.68362	8.41781	8.48193	8.66944	8.54862
A_30_P01019175	3.44713	3.16161	3.81489	3.16161	2.69821	2.75274	3.14131	3.58375	2.49994	3.32048	3.65706	3.14131
A_30_P01020041	3.51706	4.07596	4.66476	4.42559	4.64808	4.07596	2.85598	4.04351	4.40588	3.92979	4.16577	4.20541
A_30_P01029672	3.87758	3.41368	3.97827	3.5118	2.16672	3.36199	2.38955	4.3421	3.14131	3.46357	3.44161	3.81489
A_55_P2136612	3.92584	4.3212	3.81489	3.00569	4.22162	3.59872	2.96777	3.38519	3.2962	4.20541	3.92188	4.52293
A_55_P2166262	10.5652	10.4291	10.405	10.1701	10.3377	10.461	10.1094	10.4135	10.6033	10.3495	10.5677	10.5791
A_51_P288479	8.06132	8.3246	7.98139	7.93682	7.97472	7.925	7.70412	8.21204	8.01838	7.97603	8.02439	7.94148
A_51_P475704	5.09761	4.95567	5.0033	4.3272	4.96916	4.20215	4.3	4.54884	4.57682	4.64087	4.42838	4.4478
A_55_P1963639	4.92037	4.78302	5.36743	5.56828	5.12543	5.13401	5.16952	4.92037	5.20906	5.39911	5.39126	5.41046
A_55_P2367350	4.38013	3.83187	5.25701	4.12845	4.58936	3.59872	3.69932	3.58375	3.14131	4.12156	4.64568	4.16242
A_55_P1958354	15.9288	15.7637	15.5554	15.6189	15.6683	15.7326	15.5378	15.9341	15.8865	15.6083	15.8894	15.738
ERCC-00092_138	4.84289	4.75658	4.75658	4.26915	4.99578	3.83187	4.17246	4.13873	3.90993	5.04941	3.83187	4.37434
A_55_P1967015	8.08564	8.31756	8.3531	8.06132	8.1594	8.36108	7.92846	8.45982	8.43302	8.21164	8.2721	8.1906
A_52_P63855	3.58124	4.12156	6.02768	3.00569	5.4808	3.59872	3.44713	3.44161	3.14131	4.20541	2.43473	3.44713
A_55_P2092225	4.52554	4.75658	5.27885	4.57682	4.85955	3.83187	4.69988	4.20867	4.37724	4.86575	4.31518	4.93813
A_51_P108862	11.876	11.8229	11.8828	11.5097	11.6736	12.1823	11.8105	11.7921	12.0456	11.7184	11.9523	11.6465
A_55_P2114656	5.87422	6.03778	5.92853	5.91663	6.13807	6.07749	5.83948	6.18963	5.91962	5.7909	6.25563	6.10395
A_52_P628212	3.44713	3.41368	3.69932	4.3272	6.04235	2.86426	3.36783	3.85283	2.75274	2.58254	2.85598	3.69932
A_55_P2106569	14.6425	14.5621	14.4114	14.5823	14.3925	14.3793	14.4702	14.6065	14.5823	14.2847	14.6065	14.4189
A_51_P127841	7.18188	7.07604	7.41425	7.1769	7.00036	7.54907	7.39366	7.18126	7.05065	7.08293	7.29261	6.94971
ERCC-00099_60	3.92584	3.46357	4.51769	3.78903	3.8234	3.59872	3.69932	3.69469	3.62818	4.02886	4.37724	3.69932
A_55_P2152637	3.58124	2.69821	4.45055	4.01405	3.2962	3.92979	3.2962	4.85541	3.44161	4.29081	4.47238	3.75826
A_55_P2372897	7.38972	7.07604	6.81899	7.11299	7.14774	7.3143	7.07493	7.40647	7.15725	7.15218	7.04519	7.42513
A_66_P136749	3.70394	3.32048	3.20788	3.10684	3.44713	2.66067	2.96777	3.98017	2.96007	3.32048	4.16577	5.8515
A_55_P2038077	15.1681	15.0092	14.974	15.0852	15.0785	14.9156	14.8251	15.0436	15.1432	14.9545	15.0785	15.1225
A_30_P01019417	4.38013	4.38876	4.80684	4.48585	4.40588	3.20788	3.57873	4.11811	3.2962	4.37434	3.99155	3.92584
A_52_P345539	4.92037	4.72283	4.95567	4.04716	4.58936	4.88419	4.21516	6.25011	5.04759	4.88825	4.84708	4.76544
A_55_P2058591	5.4632	5.17785	5.57587	5.5498	5.04578	5.41611	4.9479	6.0899	5.4048	5.23323	6.65628	5.41046
A_55_P2006392	15.8266	15.69	15.483	15.441	15.5414	15.6151	15.4247	15.7684	15.7488	15.4916	15.6659	15.5755
A_55_P1990755	10.6341	10.3832	10.436	10.2626	10.2938	10.6392	10.1171	10.3944	10.7052	10.3045	10.7722	10.3346
A_55_P2082880	4.67891	4.55653	4.57934	4.84708	4.85955	4.28002	3.69932	4.7588	4.4478	5.09057	5.65076	4.85541
A_52_P578768	8.20981	8.3134	8.17342	8.10149	8.23746	8.42272	7.98175	8.35906	8.34147	8.18761	8.34831	8.27317
A_55_P2021373	2.19325	3.83187	3.75826	3.32048	4.47238	3.47443	2.96777	4.18903	0.81172	3.83187	3.75381	3.81489
A_51_P427476	10.0508	10.4987	10.0198	9.99587	10.1389	9.9248	10.0856	10.5302	10.2338	10.2302	10.4127	10.3297
A_55_P2157330	15.3906	15.441	15.3192	15.2598	15.3542	15.3937	15.2209	15.5414	15.5378	15.2934	15.4947	15.3649
A_55_P2150781	4.8154	4.75658	4.85541	4.84708	4.76102	4.63241	4.3	6.44623	4.47238	4.78955	5.74007	4.68477
A_55_P2088550	2.71203	2.91296	4.19561	2.70744	3.14131	0.278361	-1.91082	3.38519	-0.170805	3.92979	2.65113	2.27002
A_51_P279100	9.84609	9.47343	9.45907	9.19699	9.8384	9.63146	9.60477	9.77621	9.75226	9.40006	9.62241	9.54808
A_51_P109144	8.33553	8.39986	8.82068	8.31113	8.01606	8.85613	8.6812	8.47679	8.50246	8.02693	8.34628	8.11195
A_55_P2153743	8.22827	8.23207	8.27734	7.7253	8.02981	8.55631	8.02647	7.86786	8.21447	7.71675	8.05319	8.12902
A_52_P281659	6.78396	7.37658	6.37051	6.65031	6.93995	7.07715	6.06363	7.63927	6.70837	6.61885	7.24783	6.98857
A_55_P2159870	4.52554	4.83449	4.66476	3.95326	4.7068	4.63241	4.3	6.1118	4.77645	5.84628	4.6239	4.55397
A_55_P1991668	3.03532	4.55653	4.98063	3.63304	4.10768	3.88573	3.36783	3.92979	3.94937	5.62541	4.93026	4.40304
A_30_P01031172	5.05485	5.70247	6.75364	5.21878	5.66505	5.4329	5.27497	5.99507	5.27575	5.6792	6.25563	5.74232
A_30_P01025460	4.02886	3.98398	4.80684	4.20215	4.58936	4.69293	4.21516	4.40019	4.22162	5.17452	7.24783	4.88419
A_55_P2134012	11.8449	11.6632	12.0557	11.768	11.3847	12.1023	11.8833	11.5923	11.6477	11.4567	11.7645	11.3287
A_30_P01020122	3.44713	3.67129	4.22162	4.12845	4.19232	2.96777	3.57873	3.55846	3.44161	3.98398	4.6239	3.04991
A_55_P2148921	7.17358	7.07604	6.69972	6.88659	6.87997	7.47125	6.97382	7.20407	7.3143	7.09924	7.03538	6.93185
A_55_P2130438	4.45877	3.77592	4.45055	3.78903	4.40588	4.31518	3.8234	5.09409	4.37724	4.37434	4.75658	4.37434
A_55_P2108122	11.7826	11.7154	11.419	11.3995	11.5677	11.654	11.3032	11.457	11.6174	11.4045	11.4839	11.4738
A_55_P1993285	4.12845	2.57247	3.97827	3.87758	4.85955	4.11811	3.57873	6.33372	3.80632	3.32048	4.20215	3.81489
A_55_P1991906	15.3726	15.6469	15.9358	15.3349	15.0966	16.218	15.8137	15.5235	15.6083	15.4755	15.5355	15.0944
A_65_P07569	10.0328	10.1813	9.41114	9.68539	10.2172	9.53363	9.51004	9.82099	10.0063	9.98725	10.1357	10.2166
A_55_P2141988	3.8234	3.77592	4.45055	3.45811	4.26915	3.59872	3.50652	3.77153	4.47238	3.83187	3.92188	3.69932
A_55_P2162229	4.21516	4.42838	5.0033	4.89837	4.90239	4.56671	4.7251	4.78302	5.17119	4.9144	4.42838	4.76544
A_30_P01029691	4.3421	4.3212	4.05441	4.12845	4.26915	4.49388	3.69932	4.7091	4.3	4.12156	6.30436	4.52293
(+)E1A_r60_a97	12.4834	12.4771	13.0661	12.7329	12.8206	12.1361	12.772	12.2161	12.0617	12.4205	12.2037	12.7499
A_30_P01022237	7.40895	7.48726	7.45559	7.20814	7.60957	7.43802	7.47498	7.92141	7.47261	7.29721	7.42862	7.26004
A_51_P416919	9.43461	9.57457	9.50422	9.48669	9.50012	9.65685	9.5264	9.48287	9.4373	9.44042	9.46767	9.38242
A_30_P01031135	3.92584	3.92979	6.33223	3.00569	4.30305	3.47443	3.14131	3.92979	3.14131	3.87758	3.32048	3.69932
A_30_P01027362	6.08016	6.20519	5.86187	5.60085	5.61809	6.10133	5.83948	6.1118	5.91962	5.65196	6.17971	5.8515
A_55_P2279927	6.25955	5.94326	6.00071	5.81779	5.77342	6.20926	5.78655	6.16261	5.76128	5.5934	6.68344	5.99413
A_55_P2134042	15.3265	15.489	15.2372	15.1704	15.2839	15.3869	15.2038	15.449	15.4856	15.2959	15.4269	15.2534
A_30_P01023517	5.29884	5.63754	5.59091	5.42453	5.42032	5.15441	5.29731	5.31554	5.00517	7.35453	4.75658	6.72381
A_66_P128055	7.12746	7.02226	6.74526	7.16355	7.19548	6.8687	6.90977	7.37096	6.99094	7.02179	7.12057	7.05743
A_30_P01021859	3.2962	3.98398	4.05441	3.82764	5.3848	3.83187	3.8234	4.28466	4.01033	3.16161	4.31518	4.02517
A_30_P01024126	4.38013	3.16161	4.57934	4.09014	4.26915	4.35977	3.04991	4.01405	3.2962	3.32048	3.92188	3.69932
A_55_P2177463	6.82854	6.84641	6.5659	5.8421	6.20111	6.91675	6.41768	7.05833	6.9623	6.45858	7.26474	6.61149
A_51_P397920	10.8192	11.0503	10.9347	10.8802	10.9288	11.1331	11.184	11.1134	10.8362	10.9693	10.9558	10.9294
A_55_P2132162	5.29884	5.20255	4.91041	5.1323	5.15947	5.29118	5.00142	5.54014	5.0888	5.36378	6.32024	5.41046
A_51_P519592	7.14137	7.09397	6.93456	6.51291	7.30483	6.7675	6.48029	7.31845	7.19507	7.17815	7.73506	7.3764
A_55_P2183257	4.64568	4.80684	5.25701	4.7091	6.82695	5.09057	4.9479	5.29884	4.66239	4.8387	4.86781	6.09034
A_55_P1968508	4.02886	4.20541	4.6092	3.57873	4.01405	4.63241	2.75274	4.01405	3.90993	4.51507	4.42838	4.25033
A_30_P01029070	1.95058	3.41368	3.44161	3.45811	3.44713	3.06436	3.44713	4.28466	3.90993	3.32048	4.31518	3.21438
A_51_P107176	3.77153	2.18004	4.51769	3.63304	3.87348	4.42838	3.8234	4.20867	3.69469	4.29081	4.73867	4.29081
A_55_P2182557	1.7864	2.30693	3.20788	2.19325	2.81386	2.55212	0.81172	2.75274	2.49994	2.58254	4.45604	3.14131
A_55_P1953369	7.45319	7.356	7.61249	7.4891	7.50391	7.58128	7.1769	7.33008	7.36951	7.38901	7.74505	7.41988
A_30_P01026958	3.36783	3.71772	3.03532	3.16161	4.05441	3.88573	3.57873	4.57934	3.84866	3.32048	3.56356	4.06881
A_51_P113026	4.38013	3.77592	4.13873	4.20215	4.47238	3.59872	4.51243	6.79969	3.84866	3.92979	4.22162	4.20541
A_30_P01021841	4.38013	3.67129	3.97827	4.48585	3.51706	3.59872	3.8234	4.87807	2.96007	3.59375	4.06522	3.87348
A_30_P01023215	4.30305	4.72283	5.0888	4.09014	4.10768	3.98398	4.2629	4.54884	3.90993	4.4478	4.69293	4.40304
A_55_P2057311	2.95232	3.83187	5.1323	1.83762	3.2962	2.27002	3.21438	3.92979	2.49994	3.26528	3.1138	4.52293
A_55_P2045921	4.21516	3.77592	4.63846	4.54112	4.19232	4.28002	4.3	4.78302	4.3	4.4478	4.34506	6.08193
A_52_P130912	8.53329	8.65698	8.48654	8.69316	8.82758	7.95777	8.13277	8.49665	8.24907	8.58273	8.72583	8.92682
A_30_P01026667	10.4526	10.2155	10.5337	10.8934	10.6394	10.0307	10.319	10.2715	10.2034	10.4842	10.2329	10.8152
A_30_P01030841	4.21516	3.26528	4.40871	4.16242	3.44713	4.20215	3.57873	5.24596	3.62818	3.09282	3.99155	3.44713
A_55_P1996963	6.75252	6.74414	6.27826	6.58293	6.79266	6.59168	6.503	7.22591	6.84118	7.05472	6.8417	7.13175
A_55_P1980062	6.13849	6.61518	6.44209	6.23343	6.2406	6.74077	6.40851	6.61456	6.69102	6.54417	6.79212	7.13175
A_55_P2176748	4.38013	4.42838	4.69988	4.26915	4.76102	4.31518	4.66476	4.82392	4.59931	4.57682	4.88622	4.99578
A_30_P01030105	3.14131	2.18004	3.87348	3.00569	4.01405	2.66067	-0.350838	3.77153	2.96007	2.69821	3.16161	3.87348
A_30_P01029972	3.44713	4.38876	4.22162	4.3627	4.10768	3.98398	3.87758	5.21231	4.22162	3.98398	3.56356	4.58686
A_30_P01025433	4.96724	5.32457	5.21716	5.21878	5.34837	5.21555	5.72424	5.70938	4.90038	5.17452	5.21231	5.54401
A_52_P582318	4.21516	4.3212	4.77645	4.76544	4.33913	4.35977	3.92584	4.25033	4.04716	3.87758	4.22162	4.02517
ERCC-00004_125	2.47853	3.77592	4.22162	3.39094	3.961	3.72228	3.92584	4.04351	2.96007	3.92979	3.99155	3.81489
A_55_P2050226	7.71217	6.1118	6.97621	6.17139	8.39433	6.97095	7.21463	7.48977	7.46054	6.23423	6.83065	7.62259
ETG09_205211	3.58124	3.10684	4.22162	4.20215	4.30305	3.68069	3.14131	5.60085	3.36199	4.3272	6.1057	5.97991
A_55_P2049835	3.8234	4.02886	4.98063	4.20215	4.6239	4.42838	4.38876	3.85283	3.90993	4.20541	4.16577	3.81489
A_55_P2090996	11.8238	11.7399	11.6622	11.7454	11.8802	11.8275	11.6134	11.7154	11.7643	11.8399	11.8706	11.8201
A_30_P01032866	4.52554	4.07596	4.37724	3.72683	4.37724	5.0033	4.02886	4.7091	4.33616	3.41368	4.66476	4.02517
A_66_P110769	4.3421	4.38876	4.05441	4.86781	4.95179	4.07596	4.12845	4.96532	4.9939	4.37434	4.84708	4.99578
A_30_P01025572	6.32924	6.47422	6.43307	5.9559	6.46131	6.30816	6.52013	6.51225	6.43446	6.29597	6.32024	6.14445
A_55_P1965728	4.3421	4.35977	4.85541	4.22483	5.05665	4.75435	4.21516	4.87807	4.87602	4.67421	4.45604	5.04578
A_66_P111689	7.21786	7.5674	7.20407	7.67176	7.9865	7.15725	7.21057	7.6753	7.11016	7.31676	6.93946	7.75008
A_55_P2054897	5.90062	6.2222	5.50549	5.65554	6.00071	5.80602	5.66505	6.4	6.24298	6.28522	6.2883	6.90877
A_55_P2074141	3.2962	3.41368	3.87348	4.04716	4.40588	3.83187	3.92584	3.92979	3.69469	3.16161	4.12845	4.29081
A_55_P1989871	6.20763	6.40071	6.61333	6.38065	6.3419	6.07749	6.1563	6.2222	6.20926	6.56527	6.44416	6.81899
A_51_P459012	3.36783	3.55846	3.92584	4.09014	4.40588	4.11811	3.57873	4.85541	4.40588	3.92979	4.6239	4.06881
A_55_P2013586	4.92037	3.32048	5.54014	4.57682	5.04578	5.4982	5.41046	5.04941	5.0888	5.04941	5.96411	5.06206
A_66_P114782	7.74743	8.02405	7.65665	7.28646	7.50391	7.4901	7.21057	7.77211	7.59767	7.70484	7.68	7.72757
A_30_P01024883	6.47354	6.33447	6.60533	6.42959	6.7664	6.42119	6.32024	6.55699	6.33596	6.53544	6.47354	6.81205
A_55_P2112997	9.6026	9.66317	9.45565	9.5142	9.8717	9.48505	9.26021	9.6489	9.65685	9.74513	9.66495	9.80794
A_30_P01019190	4.61902	4.12156	4.83449	4.79606	4.33913	4.69293	4.07952	4.40019	3.2962	4.9144	4.20215	4.11811
A_55_P1996573	10.9777	10.9043	11.2228	11.0439	11.1675	11.4987	11.1255	10.9852	11.3773	11.2121	11.0713	11.0323
A_30_P01022068	4.92037	5.20255	4.80684	5.53237	5.08704	4.80469	4.96916	5.52716	4.9939	5.17452	6.22702	6.48231
A_30_P01019896	4.61902	4.07596	5.29731	4.6906	4.73867	4.91041	4.78302	5.09409	4.2629	4.57682	4.34506	4.65287
A_55_P2117169	8.04023	8.173	7.90921	8.22917	8.19235	8.05703	7.8241	8.09886	8.07275	8.22827	8.52483	8.19655
A_30_P01027060	3.36783	3.59375	4.05441	3.68537	5.57587	3.36199	3.57873	4.59931	4.01033	3.16161	4.47238	4.16242
A_30_P01031921	4.21516	4.48853	4.57934	4.3272	4.19232	4.69293	4.52815	4.40019	3.84866	4.81327	4.7091	4.68477
A_30_P01019138	3.65229	3.10684	4.37724	3.68537	3.8234	3.20788	3.69932	4.11811	4.4478	4.64087	3.65706	5.50218
A_51_P511315	6.21897	5.99695	6.05144	5.65554	6.17971	6.11006	6.27826	6.27826	6.51357	6.25955	6.30436	6.14445
A_51_P255257	4.26915	5.08704	4.98063	5.05304	5.12543	4.69293	4.59931	4.63362	4.87602	5.13487	5.19272	5.15947
A_55_P2297485	10.0359	10.1623	9.82508	10.2107	10.5302	10.1457	9.88151	10.2386	10.0093	10.3261	10.2463	10.5532
A_55_P2188237	3.58124	2.18004	3.03532	4.16242	3.44713	3.36199	3.44713	4.28466	4.01033	4.3272	4.57682	3.81489
A_52_P355014	10.5007	10.407	10.2393	10.4654	10.5378	10.2289	10.1846	10.2519	10.3475	10.6013	10.4536	10.5851
A_55_P2127664	5.29884	5.47946	5.34985	5.56828	5.4329	5.17119	5.56828	5.90765	5.20906	5.6792	5.17785	6.28791
A_55_P1991054	8.51894	8.34351	8.47569	8.50635	8.52646	8.41235	8.06154	8.36846	8.412	8.56784	8.59848	8.61567
A_55_P2005552	11.6689	11.7202	10.8703	11.5208	11.5671	11.3005	10.9677	11.4661	11.5717	11.683	11.6744	11.7301
A_66_P119735	8.1781	8.09842	8.36682	9.50509	9.47504	7.64348	8.54332	8.16841	7.75816	8.7259	7.46854	9.00126
A_30_P01027284	5.35132	5.21878	5.54014	5.7468	5.64717	5.15441	5.23164	5.07817	5.29425	5.62541	5.91165	5.63512
A_51_P223709	5.36743	5.76571	5.31554	5.60085	5.4808	5.66623	5.04941	4.87807	5.57838	5.63754	5.58716	5.04578
A_55_P2168899	6.93013	6.89924	6.89672	7.24941	7.20162	6.57476	6.67287	6.93456	6.88659	7.21057	7.97603	6.8815
A_30_P01024860	5.09761	4.97491	5.978	4.57682	5.12543	5.04941	4.78302	4.82392	4.92037	5.00517	6.92766	5.0888
A_52_P519653	5.51012	5.80602	5.62054	5.81779	5.93148	5.92951	5.64717	6.2222	5.39054	5.95299	6.20233	6.05687
A_55_P2117490	5.05485	5.23483	5.81886	4.65764	4.90239	5.51012	5.31403	5.93148	5.68739	5.62541	5.87371	5.35132
A_55_P2036615	7.24941	6.86715	7.24941	6.94581	6.9463	7.20407	6.94728	6.79969	7.35011	7.17815	6.91177	6.86767
A_55_P2180176	3.77153	3.10684	4.57934	1.68799	4.47238	4.02886	4.89635	4.11811	4.59931	4.37434	4.12845	4.11811
A_30_P01028854	4.02886	4.52554	5.31554	4.38876	6.09034	4.31518	4.9479	5.26485	4.57682	4.4478	4.88622	4.82604
A_51_P116326	5.553	5.90464	5.59091	5.85773	5.97848	5.36013	5.47946	6.47354	5.78655	5.84628	5.04759	5.74232
A_51_P288978	5.4982	5.76571	5.1323	5.87422	5.34837	5.73387	5.09761	5.4982	5.43568	5.70938	5.92061	5.22522
A_55_P2094771	3.70394	3.71772	4.30305	4.3272	3.14131	4.28002	3.57873	3.63787	2.85598	4.29081	5.61196	4.20541
A_52_P466659	3.70394	3.67129	3.44161	3.92584	3.58375	3.59872	4.38876	2.19325	3.57873	3.46357	4.2629	4.37434
A_51_P396854	12.0086	11.7744	11.9692	12.1496	12.1165	12.0557	11.9012	11.7407	11.748	11.8583	11.637	11.8977
A_51_P112237	6.75252	7.03056	7.04018	7.22832	6.7357	6.94728	6.70376	6.95844	6.86458	6.63467	7.41372	6.74077
A_55_P2021709	10.1741	10.4466	10.968	10.4783	10.1207	10.8022	10.5059	10.2245	10.1771	10.2569	10.0427	10.0597
A_55_P2121426	12.3448	12.3474	12.2481	12.4752	12.5404	12.0635	12.0385	12.4554	12.2761	12.38	12.135	12.4948
A_52_P282762	8.80221	8.83418	8.78719	8.92367	9.1256	9.00466	8.63946	8.98771	8.96058	9.04539	9.04835	8.93986
A_55_P2063871	11.0849	11.067	11.1486	11.1447	10.9739	11.1052	10.9492	10.8177	10.94	10.8892	10.5596	10.867
A_30_P01029438	5.61073	5.56955	5.0888	5.26015	5.36597	5.13401	5.27497	5.46592	5.20906	5.70938	5.61196	5.33205
A_55_P2004511	9.78325	9.25195	9.60307	10.1471	10.6223	9.22358	9.37466	9.06528	9.26119	9.39453	9.89575	9.61366
A_30_P01026072	4.12845	4.80684	4.30305	4.52031	4.6239	4.85541	4.07952	4.78302	4.92037	4.81327	4.75658	4.3272
A_55_P2091149	4.12845	3.41368	5.86187	3.82764	3.65229	4.20215	4.3	3.92979	3.69469	3.71772	4.31518	4.47778
A_55_P2104363	4.64568	3.98398	6.5979	4.3	4.47238	4.63241	4.78302	7.69298	5.0888	4.51507	4.47238	4.25033
A_55_P2049687	5.66623	5.60085	5.7909	5.7646	5.80387	5.66623	5.7974	7.26786	5.59216	5.49953	5.56066	5.66623
ERCC-00160_243	4.02886	3.83187	3.75826	3.78903	4.05441	4.07596	4.02886	4.43117	3.69469	3.32048	4.12845	4.29081
A_66_P118752	7.91681	8.18833	8.03932	8.28978	8.1871	8.11336	8.03635	8.10422	7.82781	8.22335	7.71589	8.26927
A_55_P2005145	6.33819	6.25877	6.00071	5.85773	6.07482	6.17971	5.94326	5.76128	6.43446	6.29597	5.92061	6.41768
A_55_P2209178	3.92584	4.07596	4.57934	3.78903	4.6239	3.83187	3.57873	4.01405	3.57873	4.67421	4.37724	4.52293
A_30_P01026203	6.89722	6.98098	7.13518	7.28646	7.39955	6.90301	7.19835	7.22189	7.02434	7.10318	6.58981	7.22872
A_55_P2046877	4.7091	4.78302	4.6092	4.12845	4.58936	4.88419	4.89635	5.62785	4.75212	4.37434	4.66476	4.7091
A_51_P466824	7.16857	7.73323	7.62564	6.97382	7.25099	7.66275	7.47498	7.91657	7.7976	7.57199	7.54489	7.32465
A_55_P2142393	7.17732	7.06957	7.22872	6.46131	6.42749	6.55699	6.85526	7.37096	7.05065	6.804	7.03056	7.05743
A_55_P1958976	4.08307	3.88166	3.92584	3.87758	3.58375	3.36199	3.8234	3.98017	3.44161	3.59375	3.37943	3.69932
A_55_P2046661	6.00633	6.56527	6.71296	7.29702	7.06508	5.79199	6.48701	6.31572	5.76902	6.804	5.86187	6.82695
A_55_P2322555	7.86412	7.52544	7.63987	7.95268	7.92994	7.51825	7.31317	7.7619	7.80997	7.65665	7.64453	7.51447
A_55_P2134452	5.47811	5.99695	5.63875	6.46131	6.30131	5.4495	5.88036	6.17139	5.25701	5.53496	6.52504	5.82735
A_55_P2084812	9.97613	10.2035	9.88606	9.90274	9.9682	9.92881	9.99802	10.3128	10.0293	10.0883	10.1326	10.0998
A_55_P2027230	3.92584	3.10684	3.63787	2.82238	4.4478	3.92979	3.2962	4.54884	3.90993	3.71772	3.44161	3.69932
A_30_P01023648	3.58124	4.12156	4.40871	3.57873	4.05441	3.92979	3.14131	3.26528	4.40588	3.71772	4.12845	4.02517
A_30_P01030772	4.38013	4.16577	5.95299	3.78903	4.01405	3.47443	4.12845	4.25033	3.44161	3.59375	4.7091	4.37434
A_55_P2200034	3.14131	3.55846	4.05441	3.87758	3.14131	3.88573	3.57873	2.75274	1.88705	3.54308	3.92188	3.5118
A_30_P01032036	4.45877	4.38876	4.57934	4.3627	4.7068	4.56671	4.3	4.3421	4.57682	4.7588	4.37724	4.88419
A_55_P2053127	4.8154	3.88166	5.34985	4.26915	4.73867	4.63241	4.17246	4.40019	4.13531	3.87758	4.2629	4.58686
A_55_P1976142	3.87758	3.98398	5.90264	3.87758	3.70394	3.72228	3.2962	3.77153	3.2962	4.29081	4.31518	3.81489
A_30_P01018988	4.02886	4.02886	4.30305	4.26915	2.92883	3.68069	3.8234	3.69469	4.10069	4.4478	3.83187	4.4478
A_55_P2121046	4.21516	3.55846	3.63787	4.52031	4.81327	3.2962	3.44713	4.11811	3.14131	3.87758	4.84708	4.02517
A_55_P2078335	4.76102	4.61902	6.44209	5.03665	5.93148	4.11811	4.42838	4.6836	4.33616	5.19272	4.6239	4.82604
A_51_P245895	4.42279	4.07596	5.67332	4.04716	5.12543	3.47443	3.44713	4.4615	4.18903	4.25033	4.42838	4.29081
A_55_P2226660	7.0248	7.46718	7.40364	7.43559	7.63836	7.18478	7.39759	7.6797	7.4109	7.39438	7.57515	7.4901
A_52_P564413	4.58686	4.67421	4.51769	4.45877	4.26915	4.11811	4.38876	4.3421	3.44161	4.7588	3.92188	3.57873
ERCC-00083_214	2.60248	4.07596	3.63787	3.00569	3.58375	3.06436	3.14131	3.14131	2.75274	4.02886	3.56356	3.81489
A_30_P01026012	4.86781	4.64087	4.30305	4.94595	4.10768	4.49388	4.21516	4.87807	4.33616	4.51507	4.12845	7.05743
A_55_P2056846	4.12845	3.71772	3.87348	3.82764	4.37724	3.2962	2.48927	4.87807	3.44161	3.59375	4.31518	5.30797
A_30_P01032756	6.93995	6.76003	6.72835	6.86458	7.12445	7.01437	6.95408	7.09221	7.03652	6.92618	7.0511	6.96951
A_51_P109171	11.7225	11.5894	11.5884	11.4292	11.4264	11.6205	11.5755	11.7185	11.8275	11.4575	11.7501	11.4952
A_30_P01020232	3.65229	3.46357	3.92584	3.45811	2.16672	3.59872	0.432052	3.26528	3.20788	3.59375	3.44161	2.85598
A_55_P2027436	14.1523	14.1126	14.1126	13.8896	14.0303	14.0904	13.8462	14.0163	14.2074	13.8501	14.1805	13.9373
A_55_P1972882	4.58686	3.92979	4.63846	4.52031	4.7068	5.03298	4.38876	4.7091	4.2629	4.81327	4.42838	5.92951
A_30_P01028106	5.58215	5.52716	6.60533	5.34394	5.63512	5.36013	4.91838	5.47946	5.37324	5.81779	5.12887	5.13572
A_52_P578840	4.02886	3.46357	6.00071	4.3272	4.05441	3.06436	3.44713	4.20867	3.94937	4.07596	4.10768	4.16242
A_55_P1952900	3.14131	4.38876	3.75826	3.72683	3.44713	3.06436	0.81172	6.94533	3.44161	3.41368	6.48029	4.11811
A_55_P2143934	6.92321	6.66638	7.02526	7.01437	7.15935	6.83881	6.82854	7.11451	6.83065	7.01484	7.09771	7.0878
A_55_P2334684	6.17056	6.26543	6.11353	5.97227	6.2406	6.67758	5.78655	6.1118	6.69102	6.27749	6.42119	6.5659
A_30_P01021119	4.38013	4.20541	4.37724	4.45877	3.92188	4.77645	3.57873	4.13873	4.53853	4.60427	5.12887	4.99578
A_51_P236197	9.35432	9.05672	9.09899	9.12458	8.97355	9.40831	9.07467	9.13995	9.4166	9.14548	9.34626	9.11274
A_30_P01021847	3.8234	3.10684	4.51769	3.87758	3.92188	3.06436	2.96777	4.52293	3.90993	3.98398	3.70394	4.29081
A_51_P324529	4.96724	4.88419	5.33354	5.44123	4.81327	4.42838	4.83975	4.9939	5.03298	5.29118	6.2883	4.91041
A_30_P01023812	6.67992	6.25877	6.14997	6.48029	6.50764	6.17971	6.64911	6.59976	5.93738	6.11353	7.23592	6.6916
A_51_P122723	12.5958	12.4915	13.0058	12.5858	12.3376	13.1919	12.9689	12.4518	12.5156	12.3104	12.5085	12.1714
A_51_P185713	7.90946	8.05342	8.46101	8.12375	7.86077	8.25793	8.51196	8.05331	7.90758	8.20167	7.87543	7.85143
A_55_P1980311	9.31371	9.06224	9.01359	9.14792	9.08799	9.29469	9.01655	9.15194	9.36739	8.89371	9.39185	9.02569
A_55_P2125623	6.29558	6.601	6.69972	6.54674	6.26034	6.3625	6.57476	6.44623	6.33596	6.85734	6.30436	6.46131
A_30_P01030258	3.03532	3.98398	4.01405	3.78903	4.22162	4.11811	4.17246	4.07952	3.80632	4.02886	4.59683	4.37434
A_30_P01033484	5.94521	5.97514	5.60827	5.17785	5.82841	5.55556	5.56828	6.06048	5.76128	5.07639	6.08637	5.82735
A_55_P1965248	2.47853	3.59375	3.75826	3.45811	2.69821	2.86426	2.96777	6.25011	2.85598	3.71772	3.02058	3.44713
A_55_P1956443	8.43198	8.48713	8.31113	8.04252	8.29926	8.34184	8.11759	8.37708	8.46331	8.31189	8.25518	8.173
A_66_P113401	4.02886	4.07596	5.92853	4.3	4.40588	3.78903	4.3	4.25033	4.4478	3.26528	5.29425	4.02517
A_51_P112817	5.978	6.73118	7.04747	6.20926	5.85566	6.42119	6.27826	6.58731	6.54738	6.27749	6.62921	6.27826
A_51_P210732	3.14131	3.41368	4.63846	4.22483	4.4478	3.36199	3.21438	3.81489	3.84866	4.51507	3.83187	3.69932
A_51_P126437	9.06466	9.2304	9.5197	9.26779	9.27261	9.55313	9.28543	9.53274	9.66206	9.28302	9.36256	9.01672
A_55_P1968778	7.43836	7.38073	7.28973	7.28646	7.41952	7.78525	7.06755	7.48977	7.75412	7.4614	7.6623	7.4901
A_55_P1974957	4.30305	3.55846	4.5437	4.22483	4.40588	3.92979	4.38876	5.52716	5.4808	5.36378	5.32607	4.99578
A_55_P2153762	4.38013	4.69988	4.66476	4.57682	5.01264	4.95567	3.87758	5.3848	5.1323	4.47238	5.17785	4.76544
A_30_P01018027	4.64568	4.80684	5.23483	5.17785	5.58966	5.09057	5.00142	6.324	5.1323	5.25544	5.0888	4.74541
A_55_P2252426	3.58124	4.16577	3.97827	3.95326	4.73867	4.15906	4.21516	4.3421	3.57873	3.87758	3.83187	4.3272
A_55_P2106666	11.1442	11.218	11.1131	11.0835	11.2273	11.1756	10.7855	11.1821	11.0505	10.9779	11.2283	11.2579
A_52_P531175	10.7722	10.8706	11.0485	10.6263	10.6452	10.8993	10.7267	10.8281	10.697	10.5301	10.6276	10.4923
A_51_P412866	3.2962	3.98398	3.75826	2.08408	3.14131	3.36199	3.2962	3.69469	4.18903	4.29081	3.75381	3.2962
A_55_P2137576	5.01078	5.553	4.93223	4.48585	4.90239	4.75435	5.04941	5.51012	5.37324	5.34542	5.0888	5.13572
A_52_P32864	8.12859	8.2641	7.87812	8.0723	7.98946	7.61003	7.76591	8.17342	7.83704	8.00358	7.95874	7.91657
A_30_P01020820	5.33354	5.30797	5.54014	5.3848	7.09287	5.13401	5.56828	7.24109	5.18943	5.46864	5.54787	5.54401
A_55_P2185407	4.64568	4.38876	4.66476	3.82764	5.2742	4.88419	4.51243	6.84118	4.72055	4.88825	4.6239	4.3272
A_55_P2186205	5.53885	5.26953	5.74904	4.7091	5.45225	5.11506	3.04991	5.86187	5.24438	5.00517	4.66476	4.99578
A_30_P01031637	4.21516	3.71772	4.75658	4.3272	3.8234	2.55212	3.14131	4.85541	3.90993	3.83187	4.91041	3.81489
ERCC-00112_152	3.92584	3.46357	4.05441	1.37096	3.58375	2.86426	2.75274	3.85283	2.75274	1.4913	3.83187	3.81489
A_55_P2121735	3.92584	4.38876	4.19561	4.42559	4.30305	4.28002	3.36783	3.81489	4.33616	4.7588	4.02886	4.76544
A_30_P01024792	3.87758	4.45877	3.87348	4.54112	4.76102	4.75435	4.02886	4.4615	4.53853	6.48029	4.55141	6.59324
A_66_P105635	3.14131	2.80528	3.75826	3.57873	3.01315	4.20215	1.69707	3.77153	3.14131	2.81386	2.95232	4.29081
A_30_P01032351	5.44123	5.25701	5.50549	5.3848	5.63512	5.36013	5.35279	5.54014	5.4048	5.29118	5.26172	5.63512
A_55_P2098995	11.071	11.0959	11.1794	11.1788	11.3899	10.545	11.0868	11.2446	11.0375	11.1478	11.0849	11.3216
A_55_P2183378	10.1649	10.2252	10.131	9.97542	10.3896	10.364	10.3229	10.3389	10.2628	10.2722	10.4702	10.3099
A_55_P2107775	6.06138	5.80602	6.11353	5.30341	5.01264	5.74232	6.75085	6.25011	5.66505	5.7909	5.60085	5.13572
A_30_P01027575	3.20788	4.48853	4.22162	4.45877	4.76102	4.42838	3.92584	4.73416	3.94937	4.53853	4.6239	4.6239
A_51_P105068	3.77153	3.92979	3.97827	4.63846	3.76712	2.66067	3.8234	4.3421	3.80632	3.92979	5.53237	3.2962
A_30_P01023945	11.01	10.8853	10.7006	10.8819	10.8399	10.756	10.7808	10.7966	10.8065	10.9127	10.966	11.0394
A_66_P113556	8.78787	9.25195	8.55215	9.15953	9.51675	8.04206	9.12021	8.99592	8.70718	8.88045	8.64337	9.17261
A_55_P2126072	3.36783	3.32048	3.63787	2.37803	4.10768	3.59872	3.14131	3.55846	2.96007	3.59375	3.32048	3.92584
A_51_P162098	10.0888	10.5034	10.6202	10.3845	10.3155	10.6159	10.7662	10.3775	9.88059	10.3002	9.93288	10.3524
A_55_P2146185	14.5527	14.52	14.3297	14.9539	15.1061	14.5454	14.5697	14.3625	14.1285	14.5841	14.3307	14.7382
A_30_P01026394	3.70394	3.55846	4.30305	4.3272	4.7068	4.28002	3.92584	4.63362	3.84866	4.37434	4.7091	4.47778
A_30_P01033011	4.12845	3.98398	3.87348	4.12845	4.57682	3.83187	3.92584	4.57934	4.77645	4.16577	4.34506	4.58686
A_52_P656628	3.14131	1.7864	3.97827	3.00569	3.44713	2.86426	2.75274	6.36833	1.88705	2.91296	3.65706	3.5118
A_30_P01020536	4.64568	4.80684	4.91041	5.03665	4.99578	4.69293	4.83975	6.2406	4.77645	5.17452	5.35866	5.20418
A_51_P246224	9.81169	9.47757	9.43091	9.59865	10.1601	9.37619	9.53752	9.49233	9.45736	9.497	9.76948	9.63653
A_30_P01026915	3.70394	3.10684	5.36743	4.52031	3.961	4.58936	3.8234	4.3421	3.90993	4.60427	3.7977	4.82604
A_30_P01031372	2.95232	2.57247	7.05833	4.01405	3.44713	3.72228	2.96777	2.99819	3.50652	3.09282	3.44161	7.10668
A_55_P2033272	3.8234	3.77592	4.37724	4.04716	3.92188	3.56356	4.34506	4.20867	3.90993	3.59375	5.06745	5.61564
ERCC-00048_92	3.70394	3.71772	3.75826	3.68537	2.92883	3.2962	4.3	4.31215	2.24488	3.16161	3.16161	3.6427
A_55_P2123616	4.02886	3.88166	4.91041	5.4048	4.01405	4.69293	4.02886	4.92037	3.36199	3.87758	5.03206	4.02517
A_51_P108659	10.744	10.1759	10.8186	10.3123	10.9794	10.3662	9.81383	10.1298	9.92009	9.5062	9.2552	9.85978
A_66_P123155	9.02609	8.97331	9.68882	9.06556	8.89592	9.68729	9.59236	9.08057	9.13033	8.81261	9.16184	8.62301
A_30_P01032625	6.25523	5.97514	6.30055	6.44967	6.27671	6.30816	6.11873	6.46336	6.32775	6.4	6.73118	6.2975
A_55_P1963134	4.21516	3.92979	4.5437	4.38876	3.92188	4.11811	4.42838	4.25033	4.10069	0.897474	4.75658	4.47778
A_30_P01029328	4.45877	3.46357	4.75658	3.26528	3.87348	3.88573	4.12845	4.65525	4.40588	3.46357	4.73867	4.20541
A_55_P2408864	4.45877	4.16577	4.66476	4.38876	4.30305	4.52554	4.89635	4.6836	4.13531	4.07596	4.55141	4.7091
A_65_P16680	9.49058	9.25116	9.29287	9.39435	9.55705	9.30233	9.2311	9.46546	9.54221	9.72851	9.62664	9.72343
ERCC-00142_99	3.44713	4.3212	3.75826	3.95326	3.76712	3.72228	3.69932	4.31215	3.84866	3.71772	3.83187	4.7091
ERCC-00054_84	4.12845	2.57247	2.85598	3.72683	3.87348	4.02886	3.7627	4.57934	3.2962	3.83187	4.57682	3.57873
A_30_P01027957	5.13914	5.32457	5.04759	5.46183	5.12543	5.21555	4.4615	5.4982	5.20906	5.00517	4.55141	5.39054
A_55_P2066274	11.0835	11.14	11.0153	11.0439	11.3527	11.0209	10.9089	11.0459	11.1027	11.2369	11.3081	11.1569
A_30_P01026422	4.86781	4.3212	4.93223	4.3	5.17785	4.72055	4.07952	4.65525	4.66239	4.64087	6.38209	4.4478
A_30_P01028940	4.02886	2.18004	4.13873	3.45811	5.23643	3.06436	3.04991	3.90592	3.57873	3.16161	4.31518	3.69932
A_30_P01022794	3.8234	1.95058	2.85598	2.19325	3.70394	2.12599	3.44713	4.40019	3.80632	3.67129	3.44161	2.55212
A_30_P01020379	5.12887	4.64087	5.43568	5.63754	5.63512	5.15441	5.27497	5.28349	5.4048	5.03298	4.88622	5.36888
A_30_P01017656	3.51706	2.18004	2.64153	3.45811	3.70394	3.20788	3.14131	4.6836	4.01033	3.71772	3.56356	3.81489
A_55_P2015177	10.7534	10.745	10.3689	10.7033	10.7779	10.5054	10.3102	10.6929	10.7095	10.6799	10.6583	10.7523
A_55_P2020366	6.25955	6.29367	6.36104	7.07715	6.64491	5.95493	6.43724	6.26972	5.85046	6.41557	6.78505	6.50035
A_30_P01023036	3.44713	2.4458	3.36783	2.82238	3.51706	3.06436	3.57873	4.01405	3.44161	2.81386	4.20215	3.81489
A_55_P2004901	2.60248	2.4458	3.50652	2.08408	3.36783	2.12599	3.69932	2.85598	3.20788	2.81386	3.59375	3.44713
A_51_P225506	11.1122	11.2194	10.9901	11.1558	11.2674	11.1303	11.0534	11.0321	10.8278	10.9601	10.8663	11.1731
A_55_P1973844	4.58686	4.45877	5.0888	4.79606	4.22162	4.75435	4.52815	4.65525	4.37724	4.81327	5.82417	5.04578
A_55_P2350553	6.4507	6.79483	6.84902	7.52185	7.93682	6.57476	6.80508	7.20407	6.44898	7.51134	6.70319	7.5877
A_51_P432403	6.45927	6.81312	6.00071	6.3419	6.48096	5.90464	6.21897	6.87639	6.49436	6.8952	6.503	6.85422
A_30_P01025430	5.27885	4.64087	4.10768	4.45877	4.58936	4.95567	5.19107	5.4329	4.9939	5.34542	4.7091	4.76544
A_55_P2062811	11.1587	11.2265	11.4214	11.556	11.419	11.5328	11.4821	11.1422	10.9039	11.2694	10.9345	11.2727
A_30_P01026837	4.3421	2.69821	4.19561	3.5118	3.76712	3.72228	3.2962	5.62785	3.74935	3.26528	4.2629	3.81489
A_55_P1978576	11.1359	10.9166	11.2548	11.221	11.2816	11.384	10.9705	11.079	11.0924	11.1617	11.0456	11.0027
A_30_P01025165	5.553	5.44675	5.83474	5.34394	6.40993	5.52716	5.58215	6.01287	5.91962	5.81779	6.15841	6.23582
A_55_P2173626	3.70394	3.67129	3.63787	3.95326	4.10768	4.28002	4.63846	4.07952	4.18903	3.71772	3.94937	4.91041
A_51_P104125	8.05342	8.28449	8.16967	8.1204	8.39183	8.43493	7.84255	8.1574	7.97316	8.23756	8.37228	8.10706
A_52_P27244	7.30692	7.42793	7.4614	7.54086	7.41636	7.23032	7.43905	7.33008	7.24149	7.30711	7.61203	7.33008
A_30_P01023396	4.52554	4.3212	4.75658	4.89837	4.37724	3.83187	4.52815	4.65525	4.66239	5.04941	4.88622	4.47778
A_52_P148212	3.58124	3.10684	3.14131	3.00569	3.01315	2.86426	3.69932	4.6836	0.81172	2.99819	3.16161	3.69932
A_30_P01024168	3.92584	4.42838	4.77645	4.22483	4.58936	3.92979	4.52815	4.54884	4.04716	4.51507	4.2629	6.10395
A_55_P1970287	2.95232	3.77592	3.75826	3.92584	3.58375	4.02886	3.57873	3.69469	4.18903	3.77153	4.31518	4.93813
A_55_P2079064	9.54872	9.233	9.52909	9.63668	9.90236	9.64976	9.37339	9.767	9.46418	9.55469	9.59982	10.2072
A_55_P2182134	4.89837	4.75658	4.85541	4.26915	3.87348	4.75435	4.51243	4.3421	4.33616	4.70219	5.16115	4.80469
A_30_P01018846	4.02886	4.95567	3.87348	3.92584	3.961	4.28002	4.38876	4.7588	4.01033	4.37434	3.99155	4.4478
A_55_P1971347	6.36469	6.2222	6.30055	6.28522	6.46131	6.2222	6.08902	6.17971	6.33596	6.24219	6.00633	6.42959
A_66_P129893	5.73557	5.4329	5.67332	5.51801	5.73669	5.4982	5.66505	5.22763	5.25701	5.62541	5.26172	6.61149
A_51_P131442	6.22702	6.00446	5.36743	5.77781	5.67744	5.88138	5.14255	5.6792	5.85046	5.81779	5.8885	6.10395
A_30_P01021282	4.30305	4.02886	4.05441	4.22483	3.92188	3.06436	3.8234	3.69469	4.18903	2.58254	4.6239	3.2962
A_55_P1987245	9.11154	9.12431	9.05763	9.44827	9.40308	8.78016	9.00161	9.02471	8.91945	9.26001	9.09526	9.47504
A_51_P383194	6.27749	5.61196	5.74904	6.29673	6.00071	6.07749	5.86703	5.73669	5.98086	5.70938	6.31497	5.42872
A_55_P2011097	4.02886	3.88166	4.51769	4.74092	4.51243	3.92979	4.21516	4.3421	4.37724	4.70219	4.80469	4.20541
A_55_P2085776	5.04578	4.55653	5.04759	4.57682	5.2742	4.69293	5.09761	5.88698	5.37324	5.17452	6.53252	5.46592
A_51_P234714	3.44713	3.77592	4.57934	3.72683	4.58936	3.14131	4.3	3.63787	3.80632	4.25033	4.34506	3.92584
A_30_P01023952	3.58124	4.07596	2.75274	3.32048	4.19232	3.88573	3.8234	5.65494	3.57873	3.87758	3.65706	3.92584
A_51_P190961	3.70394	3.41368	3.75826	3.16161	3.76712	2.66067	3.63787	3.85283	3.2962	3.32048	4.10768	3.57873
A_66_P139295	10.6647	10.5923	10.7423	10.9224	10.6763	11.0182	10.7684	10.5585	10.5951	10.6634	10.4601	10.6922
A_55_P2083609	13.7438	13.864	13.2749	13.5259	13.6971	13.4693	13.5099	13.8702	14.1591	14.1481	14.1023	14.155
A_55_P2023480	4.30305	3.26528	4.57934	5.08438	4.33913	3.72228	4.21516	4.57934	4.53853	3.67129	5.49553	3.92584
A_30_P01030528	4.7091	3.26528	4.30305	4.94595	4.26915	3.92979	4.75658	4.59931	4.18903	4.86575	6.32024	4.29081
A_55_P1956652	5.18117	4.95567	5.0033	5.10287	5.4808	4.93223	5.56828	5.42032	5.4048	5.65196	5.0888	5.33205
A_52_P392216	3.92584	3.10684	4.13873	3.68537	4.01405	3.59872	4.07952	3.69469	4.40588	3.83187	4.12845	4.29081
A_30_P01019839	3.87758	4.28466	4.30305	4.20215	4.58936	4.75435	4.52815	3.69469	4.66239	4.51507	5.39126	4.11811
A_52_P584188	7.89096	7.48189	7.76619	8.10149	7.57562	7.96693	8.02923	7.77924	7.34569	7.65412	7.6876	7.65844
A_30_P01032108	6.70837	6.69393	6.67051	6.5659	6.69943	6.57476	6.55954	6.81258	6.86458	6.88456	6.89267	6.92321
A_55_P1973339	8.50263	8.50759	8.72135	8.6325	8.71371	8.51188	8.49064	8.46382	8.3912	8.61927	8.75074	8.71536
A_30_P01018268	4.30305	4.3212	4.57934	4.3272	4.22162	4.49388	4.42838	4.25033	4.10069	4.29081	5.17785	4.11811
A_66_P129747	8.54541	8.4479	8.69113	8.65594	8.5886	8.75687	8.56491	8.41288	8.51525	8.52646	8.2785	8.6546
A_65_P20699	7.68935	7.83349	7.59736	7.77664	7.95656	7.89198	7.27098	7.56312	7.79205	7.92475	7.62228	7.78947
A_55_P2127015	4.12845	3.67129	4.51769	4.01405	3.8234	3.20788	4.4615	4.40019	4.01033	3.92979	4.66476	3.81489
A_55_P2106901	8.23287	7.60371	8.6613	7.74112	7.73732	7.62366	7.55291	7.62442	7.60355	7.80997	8.5487	7.70758
A_30_P01022462	3.58124	2.69821	3.14131	2.91296	2.92883	3.59872	3.8234	3.85283	2.49994	3.16161	3.83187	3.6427
A_55_P2090345	10.8067	10.7172	10.6982	10.9294	10.8419	10.3788	10.456	10.7165	10.7558	10.7072	10.5218	10.7864
A_51_P388801	10.6908	10.5587	10.4076	10.5429	10.7487	10.4231	10.2164	10.5915	10.501	10.5147	10.5096	10.7046
A_30_P01022571	6.60718	6.57476	6.36104	6.46131	6.78013	6.81151	6.35847	6.72892	6.55699	6.84275	6.81151	7.15218
A_55_P2039537	3.70394	4.07596	4.57934	3.57873	4.4478	3.83187	3.87758	4.13873	3.90993	3.16161	4.34506	4.11811
A_51_P191463	10.878	11.1578	11.465	11.0749	11.1068	11.2301	11.4547	11.4225	11.2634	11.3171	10.5587	11.0895
A_30_P01020876	4.21516	4.02886	4.10768	4.26915	4.81327	4.11811	3.2962	4.20867	4.10069	4.12156	4.88622	4.74541
A_66_P108815	10.1388	10.2974	10.4745	10.6752	10.3099	10.4907	10.7482	10.4772	10.2824	10.4389	9.78867	10.416
A_30_P01030830	3.20788	2.91296	2.38955	2.37803	3.92188	3.83187	3.44713	4.7091	3.90993	3.98398	4.16577	4.3272
A_55_P1973006	13.2075	13.0637	13.3486	13.0404	12.8452	13.3521	13.2291	13.0857	13.2319	12.7552	13.053	12.8258
A_55_P2063033	3.14131	3.10684	4.19561	3.32048	3.36783	3.44161	2.75274	3.26528	3.84866	3.59375	3.99155	3.98017
A_55_P2097264	4.26915	3.67129	3.97827	3.78903	3.44713	4.49388	3.8234	3.77153	4.01033	4.60427	3.92188	4.20541
A_51_P392385	4.58686	2.30693	4.45055	3.39094	4.53075	3.72228	3.57873	3.85283	3.57873	4.57682	4.2629	4.20541
A_55_P1991778	11.491	11.3647	11.6446	11.1862	11.3363	12.1662	11.1709	11.3947	11.7501	11.3216	11.7338	11.1796
A_30_P01029393	3.70394	3.55846	4.40871	3.68537	3.01315	3.72228	2.19325	3.58375	4.01033	3.41368	3.49056	3.57873
A_51_P353095	9.73519	9.85861	9.86456	9.59357	9.56699	9.95424	9.65462	9.74625	9.94085	9.83146	9.97141	9.69872
A_51_P345663	12.191	12.0952	11.9397	11.6734	11.8889	12.0061	11.845	12.2934	12.2913	12.126	12.3921	12.1756
A_55_P1966863	9.97249	9.77796	9.97099	9.74825	9.68561	10.0336	9.90421	9.814	10.227	9.83896	9.95557	9.73378
A_55_P2142928	4.08307	4.02886	3.63787	4.38876	4.22162	4.28002	3.7627	4.20867	3.80632	4.12156	3.75381	4.40304
A_55_P2102901	7.48441	7.51217	7.52968	7.17024	7.12445	7.53325	7.36878	7.49377	7.54118	7.45798	7.20976	7.0878
A_55_P2016486	9.86704	9.77642	9.73603	9.58361	9.7392	9.91231	9.54084	9.75052	10.0207	9.74075	9.92294	9.8205
A_52_P314129	8.85763	8.9344	8.42044	8.41526	8.79797	8.23417	8.42062	8.71536	8.82334	8.80006	8.75527	8.85243
ERCC-00130_136	3.77153	3.98398	6.85526	4.04716	3.51706	4.38876	4.02886	3.55846	4.13531	4.07596	3.87758	3.81489
A_30_P01019321	3.8234	3.88166	2.38955	3.32048	3.92188	3.06436	3.44713	2.99819	2.96007	3.46357	3.32048	2.27002
A_30_P01032496	5.93247	6.35811	6.71296	6.65896	6.55954	5.76902	6.48701	5.76128	5.83316	6.58981	5.94228	6.05687
A_51_P395293	10.5847	10.4582	10.5484	10.333	10.3223	10.8647	10.5934	10.5775	10.6637	10.4304	10.567	10.3385
A_52_P513345	3.14131	2.99819	4.45055	3.39094	4.67891	1.7864	3.21438	3.72683	3.62818	4.12156	3.83187	3.69932
A_30_P01024221	3.92584	4.20541	4.30305	3.16161	3.961	3.36199	3.87758	3.92979	3.57873	4.57682	4.12845	2.55212
A_30_P01033285	4.3421	4.3212	4.57934	4.57682	4.53075	4.02886	3.69932	4.40019	3.50652	4.4478	4.31518	4.80469
A_30_P01027762	3.98398	3.46357	4.13873	3.45811	3.58375	2.55212	3.2962	3.69469	3.57873	3.98398	5.06745	4.20541
A_30_P01030563	3.98398	3.41368	4.05441	3.95326	4.33913	3.72228	3.21438	4.01405	3.44161	3.59375	3.75381	5.71282
A_52_P407796	13.4115	13.2214	13.7376	13.2938	13.0404	14.1881	13.7828	13.2391	13.7298	13.107	13.2938	12.9126
A_52_P240693	3.8234	3.83187	4.37724	3.95326	4.10768	3.56356	3.14131	3.77153	3.2962	4.51507	3.59375	4.20541
A_66_P130030	6.17929	4.75658	4.51769	4.52031	6.26034	5.76902	5.53237	4.7588	4.9939	4.93813	5.72651	6.2975
A_55_P2107468	6.60718	6.503	6.87665	6.46131	7.334	6.42959	6.57476	6.76031	6.49436	6.5589	6.74077	6.82695
A_52_P160397	3.70394	4.16577	4.80684	3.82764	4.51243	3.59872	3.14131	4.18903	3.62818	4.02886	3.56356	4.02517
A_55_P2057979	3.44713	4.16577	5.54014	3.32048	3.14131	3.47443	2.96777	2.92883	3.14131	3.46357	3.16161	2.55212
A_55_P1961888	9.79447	9.52076	9.45672	9.65927	9.61078	9.2874	9.48505	9.77851	9.40348	9.44392	9.72315	9.65182
A_30_P01024192	8.84232	8.8896	8.69548	8.90209	9.02719	8.64892	8.46229	9.21085	8.79289	8.81715	8.96226	8.86918
A_51_P105408	9.495	9.3871	9.65596	9.2481	9.24315	9.66332	9.38835	9.23938	9.51437	9.14548	9.26099	9.17869
A_55_P2031736	3.51706	3.88166	3.87348	3.00569	3.2962	2.12599	3.63787	4.78302	3.14131	2.99819	3.99155	3.6427
A_51_P286748	8.50263	8.4112	8.14206	7.67176	6.98715	8.00662	8.68683	8.70675	8.93157	8.29457	8.67878	8.27103
A_51_P414837	9.11279	8.84768	9.00255	8.81094	8.73573	8.96576	8.93869	9.08057	9.12269	8.87213	8.94688	8.82877
A_51_P163444	11.9192	11.6945	11.6904	11.5075	11.429	12.092	11.7489	11.7403	11.9088	11.5586	11.7764	11.4999
A_30_P01031393	3.65229	2.91296	4.05441	3.87758	4.76102	3.36199	2.75274	3.58375	3.36199	3.83187	3.83187	3.2962
A_55_P1957098	11.9271	11.6481	11.6349	11.3899	11.4423	11.8692	11.5685	11.4876	11.901	11.2709	11.7853	11.3423
A_55_P2187043	10.8634	8.34351	7.93117	8.59747	9.02326	9.19217	11.9108	8.4112	8.28487	7.89778	8.60621	8.87674
A_55_P2035454	15.0111	14.9349	14.7639	14.5931	14.7395	15.1329	14.9909	14.9545	15.0741	14.8153	15.1106	14.7844
A_55_P1964920	4.58686	3.88166	5.90264	3.39094	4.19232	4.28002	4.07952	4.52293	4.53853	4.37434	4.55141	3.57873
A_55_P2067752	4.08307	4.45877	2.75274	2.91296	3.70394	2.12599	2.96777	4.11811	2.96007	2.99819	3.32048	2.27002
A_55_P1969356	7.40895	7.31128	7.56788	6.69972	7.34384	7.83678	7.10318	7.61709	7.85455	7.28839	7.49877	7.17024
A_51_P113722	9.88403	9.96107	9.68363	9.70943	9.99658	9.94005	9.90913	9.99599	9.99387	9.83801	10.0458	9.92282
ERCC-00022_66	3.44713	3.88166	4.51769	4.12845	3.92188	2.55212	3.2962	4.01405	3.20788	4.51507	4.69293	3.57873
A_55_P2348241	3.14131	2.69821	4.10768	3.32048	3.14131	3.98398	3.36783	4.20867	3.14131	3.83187	3.70394	3.5118
A_51_P431785	8.79425	5.12887	5.57587	5.77781	6.6916	6.74806	10.1614	5.46592	4.72055	4.37434	6.2883	6.53057
A_30_P01019908	3.92584	3.71772	4.37724	3.26528	4.37724	3.47443	4.3	4.4615	3.62818	4.47238	4.12845	4.20541
A_30_P01031360	9.22528	9.72574	8.99891	9.80263	9.92949	8.68923	9.15858	9.47525	9.02165	9.62527	9.41981	9.69872
A_55_P2087275	3.2962	2.18004	3.20788	4.04716	4.01405	2.43473	3.7627	3.92979	4.18903	4.25033	5.00517	3.44713
A_55_P2214003	5.71854	5.69204	5.59091	5.6686	5.85566	6.04144	5.39197	5.99507	5.83316	5.7909	5.50284	5.39054
A_55_P1958185	4.12845	2.69821	4.22162	4.57682	4.58936	3.83187	3.44713	5.70938	3.62818	4.47238	5.30949	4.52293
A_51_P146505	8.03279	8.42919	8.43858	8.03589	8.13416	8.24332	8.28824	8.83635	8.2171	8.47831	8.46391	8.20513
A_55_P2068011	3.70394	3.55846	3.20788	3.45811	4.58936	3.56356	2.96777	3.85283	2.11215	3.83187	3.16161	4.85541
A_30_P01027974	10.4957	10.4731	10.7638	10.4601	10.3602	10.7004	10.5627	10.2012	10.4087	10.1583	10.1953	10.111
A_55_P1957700	5.26172	5.58215	5.49019	4.7091	5.4329	5.92061	5.44537	5.42032	6.23582	5.7646	5.82417	5.46592
A_55_P2067146	5.01078	4.93026	5.43568	5.17785	5.12543	5.13401	4.66476	5.42032	4.66239	5.00517	5.47676	5.65076
A_55_P2079787	3.8234	4.83449	4.57934	3.95326	4.81327	4.63241	4.4615	5.13572	4.96339	4.9144	4.51243	4.91041
A_55_P1967514	3.14131	4.20541	4.13873	3.78903	3.44713	3.20788	3.57873	4.82392	3.80632	4.12156	3.44161	4.82604
A_52_P161806	8.74851	8.58116	8.58711	8.33171	8.63417	8.88782	8.52483	8.86467	8.65087	8.55966	8.57116	8.50619
A_55_P2174945	4.61902	3.88166	5.50549	4.45877	4.83449	4.38876	4.78302	5.87422	4.3	4.98538	4.6239	4.68477
A_30_P01028071	4.38013	4.75658	5.73669	4.38876	4.47238	4.72055	4.81327	4.92037	4.51243	4.70219	4.37724	5.01264
A_55_P1960765	11.6502	11.9444	11.5085	11.8071	11.9082	11.333	11.5454	11.8572	11.5325	11.6593	11.4335	11.8732
A_51_P249537	8.36719	8.58406	8.48125	8.32526	8.33246	8.42272	8.4479	8.57424	8.49165	8.35879	8.38878	8.30316
A_51_P122425	8.49398	8.55934	8.41438	8.32526	8.33693	8.55838	8.39013	8.56332	8.52483	8.61927	8.64757	8.50354
ETG10_195139	3.44713	3.88166	4.40871	3.68537	3.8234	3.59872	3.92584	3.55846	3.69469	6.38281	3.65706	6.4
A_51_P292877	9.98923	10.1901	10.107	10.1129	9.98891	10.1394	9.99322	10.2853	10.0025	10.1378	10.2245	10.1309
A_30_P01031875	4.21516	4.3212	4.30305	4.26915	4.53075	4.11811	4.02886	4.25033	4.01033	4.57682	5.06745	3.81489
A_51_P126525	8.02127	7.97316	8.29524	7.98602	8.10181	8.38582	7.95801	8.06727	8.2813	7.94514	8.11629	15.8137
A_51_P317286	3.70394	3.26528	3.50652	4.52031	3.87348	4.15906	4.07952	4.01405	3.2962	3.77153	6.1057	3.57873
A_55_P2088054	4.86781	4.48853	4.63846	4.84708	4.85955	4.95567	4.38876	5.24596	4.3	5.17452	5.16115	4.76544
A_51_P268798	3.44713	2.18004	3.87348	2.63187	3.44713	2.86426	3.57873	3.69469	3.14131	3.26528	5.12887	3.2962
A_30_P01033534	4.45877	4.24716	4.91041	3.78903	4.37724	3.98398	3.44713	4.9939	4.2629	3.71772	5.45088	4.68477
A_30_P01031557	5.978	5.7909	6.15883	5.9559	6.11353	5.76902	5.94326	6.16261	5.80602	6.0899	6.21897	6.7978
A_55_P2127194	3.44713	2.91296	4.19561	3.39094	4.26915	3.44161	4.17246	4.18903	4.33616	4.07596	4.31518	4.02517
A_30_P01029810	3.87758	3.10684	4.37724	3.78903	3.92188	2.43473	3.69932	4.57934	3.14131	4.12156	4.37724	3.81489
A_52_P85765	5.52716	5.12887	5.29731	5.4982	5.12543	5.63754	4.75658	5.65494	5.31403	5.46864	5.60085	5.36888
A_51_P267933	4.96724	5.09761	5.1323	4.16242	4.7068	5.4495	5.35279	5.4982	6.06498	5.7646	5.50284	5.01264
A_66_P105771	4.79172	4.38876	4.45055	4.45877	4.05441	4.35977	3.92584	5.24596	4.18903	4.53853	4.88622	4.02517
A_51_P326043	5.63875	5.81566	6.14997	6.46131	6.1487	5.58341	5.8247	6.06048	5.37324	6.17971	5.32607	5.89457
A_51_P123705	9.55001	9.64316	9.37398	9.34861	9.5156	9.56007	9.16927	9.91919	9.68619	9.76513	9.76755	9.67473
A_55_P2271416	3.2962	3.41368	3.20788	3.82764	3.58375	1.37096	3.57873	5.00517	2.96007	1.95058	3.32048	2.96007
A_51_P170827	6.42749	6.18468	6.89672	5.88748	5.78981	5.62663	5.23164	5.83474	5.63512	5.70938	5.30949	5.61564
A_55_P1987569	3.14131	3.55846	3.63787	3.78903	3.44713	3.59872	3.92584	3.90592	3.62818	3.32048	3.56356	5.24596
A_30_P01027704	4.79172	5.05485	5.55939	4.74092	4.85955	4.95567	4.7251	4.80469	4.2629	4.70219	4.52554	4.52293
A_51_P227275	4.42279	4.64087	4.75658	4.52031	4.93026	5.0033	4.86781	5.04941	4.94595	4.29081	4.52554	4.99578
A_66_P113868	7.76259	7.356	6.71296	7.16355	7.44562	6.5403	6.06363	6.46336	6.54738	6.4219	6.57034	6.17056
A_30_P01033416	3.87758	3.26528	4.01405	3.95326	3.92188	4.15906	3.2962	4.07952	3.90993	2.81386	3.65706	3.2962
A_30_P01028215	15.6998	15.8137	15.6342	15.8163	16.3089	15.8824	15.7785	15.9787	15.7607	16.0194	16.0928	16.1335
A_55_P2153126	4.02886	3.16161	3.87348	3.00569	4.58936	3.59872	4.21516	4.28466	4.01033	3.83187	4.02886	4.29081
A_30_P01026791	4.3421	4.07596	3.87348	4.04716	4.53075	4.28002	4.21516	4.92037	3.90993	3.87758	4.2629	4.68477
A_55_P2095558	3.44713	3.55846	2.96007	3.16161	3.2962	1.62193	3.2962	4.52293	3.2962	3.16161	6.21897	3.37364
A_66_P120745	10.7295	10.7885	10.6632	10.6322	10.7733	10.7794	10.5526	10.7014	10.6198	10.669	10.6518	10.7006
A_55_P2090500	4.12845	3.88166	3.97827	3.68537	3.8234	3.44161	3.69932	4.20867	2.49994	3.77153	3.32048	3.81489
A_30_P01022333	3.92584	3.59375	5.19436	3.32048	3.92188	3.47443	3.44713	3.77153	3.94937	4.25033	4.66476	4.20541
A_55_P2316863	4.55397	3.92979	5.50549	4.12845	5.84052	4.07596	4.59931	4.40019	4.47238	4.16577	5.04759	4.20541
A_55_P2007761	4.02886	2.80528	5.0033	3.78903	4.26915	4.20215	2.06985	4.25033	3.69469	3.83187	4.75658	3.92584
A_51_P109274	2.47853	3.67129	3.75826	3.45811	3.76712	3.44161	3.14131	4.52293	3.44161	1.4913	3.16161	3.5118
A_30_P01029155	4.92037	5.08704	4.69988	4.84708	4.90239	4.91041	4.63846	5.31554	4.77645	5.00517	5.26172	5.26797
A_30_P01021632	3.51706	2.4458	4.10768	3.32048	3.70394	4.02886	3.14131	4.01405	4.4478	3.41368	4.93026	3.69932
A_51_P175699	11.1449	11.0045	11.8519	11.4575	10.8726	12.0911	11.942	11.0066	11.0346	11.0173	10.9043	10.805
A_55_P1984541	8.95574	9.40308	8.98741	9.2311	9.23539	8.84768	9.15099	9.46393	9.24404	9.41519	9.37719	9.48669
A_55_P2114288	12.0931	12.1009	12.199	12.0729	12.1776	12.1669	11.8439	12.0447	12.1646	12.0061	12.0388	12.0391
A_52_P228236	6.50367	6.70319	6.90326	6.19866	7.13646	7.54907	7.86245	7.64948	7.04041	7.41706	7.10798	6.85422
A_30_P01030436	7.11016	6.97191	7.08868	7.32221	7.47734	7.10143	6.90225	7.17358	6.94581	7.2391	7.36259	7.40559
A_30_P01027181	4.55397	3.10684	4.30305	4.65764	3.8234	3.68069	4.38876	5.00517	4.33616	4.02886	3.83187	4.91041
A_55_P2288047	3.44713	3.16161	3.75826	3.68537	4.19232	3.59872	3.63787	3.92979	2.96007	3.71772	4.37724	4.11811
A_30_P01032397	6.27749	6.26543	6.07749	6.42959	7.03377	6.29902	6.19702	6.85266	6.54223	6.61211	6.74862	7.15725
A_30_P01019429	3.2962	4.24716	4.05441	3.32048	4.10768	3.36199	2.48927	4.57934	3.94937	4.12156	3.26528	4.02517
A_30_P01031081	3.65229	3.26528	4.13873	3.45811	3.65229	3.72228	3.2962	4.40019	2.24488	3.92979	3.75381	4.11811
A_30_P01031971	4.61902	3.46357	2.38955	3.39094	3.8234	4.15906	4.12845	6.5716	3.69469	3.83187	3.02058	4.02517
A_55_P2140829	3.70394	3.26528	3.63787	2.63187	3.8234	3.59872	3.57873	3.90592	3.84866	3.67129	4.34506	2.85598
A_52_P642167	6.06138	6.09343	5.73669	5.87422	6.17971	6.06946	6.11873	6.25955	6.11353	6.36542	6.58981	6.46131
A_30_P01020262	4.02886	2.99819	3.03532	3.78903	3.36783	4.42838	4.02886	4.3421	3.80632	4.02886	4.47238	3.92584
A_55_P2174863	3.87758	4.24716	4.45055	4.38876	4.53075	4.02886	4.89635	4.3421	4.33616	4.53853	4.57682	4.52293
A_51_P112677	10.0947	10.2423	10.7468	10.4672	10.0936	10.6814	10.5759	9.92572	10.196	9.9753	9.89915	9.82166
A_30_P01026689	2.60248	3.98398	3.92584	3.72683	4.13531	3.2962	3.2962	4.13873	4.13531	3.77153	4.28774	3.69932
A_30_P01019864	4.8154	4.99955	4.77645	5.03665	5.20255	4.97873	4.81327	5.6792	4.82604	4.93813	5.16115	4.88419
A_52_P265051	4.12845	2.69821	4.05441	3.87758	3.2962	3.20788	4.3	4.57934	3.44161	2.81386	3.44161	4.7091
A_30_P01030150	2.71203	3.88166	3.92584	1.83762	3.14131	3.44161	4.12845	3.69469	2.96007	3.77153	4.02886	3.5118
A_55_P2018337	4.02886	3.46357	4.51769	4.63846	4.37724	4.49388	4.3	4.48585	4.47238	4.37434	5.04759	4.58686
A_55_P2349752	6.82854	6.48701	7.00176	6.88659	7.14179	6.77959	6.69509	7.0153	7.24704	7.10318	7.07046	7.22872
A_30_P01033406	5.81459	5.30797	5.34985	5.53237	5.95493	5.95493	5.64717	5.73669	5.57838	5.87729	5.4329	5.79848
A_55_P2301995	2.85182	3.55846	3.36783	3.57873	3.58375	3.06436	3.92584	3.81489	4.01033	3.59375	4.6239	3.5118
A_55_P2130365	3.44713	3.10684	3.63787	2.82238	3.8234	3.59872	3.2962	3.26528	3.03532	1.7864	3.94937	5.58215
A_30_P01026715	4.52554	3.26528	4.19561	4.09014	4.47238	3.59872	4.3	3.77153	4.47238	4.12156	4.12845	4.47778
A_55_P2039601	9.59236	9.63491	9.32814	9.5142	9.26842	9.30376	9.15627	9.42947	9.40565	9.4806	9.52371	9.62729
A_51_P274504	11.6239	11.5829	11.5342	11.6844	11.7237	11.746	11.5295	11.5003	11.6324	11.7864	11.5369	11.7943
A_55_P1970335	4.96724	4.75658	5.06835	5.1323	5.54787	4.56671	5.29731	4.87807	4.90038	4.9144	4.88622	4.82604
A_51_P115462	3.44713	3.41368	3.87348	2.47853	4.10768	0.278361	3.92584	3.44161	3.2962	3.71772	3.7977	2.66067
A_55_P2405353	3.8234	3.16161	2.38955	3.00569	3.58375	2.66067	2.75274	3.14131	3.2962	2.99819	3.87758	2.55212
A_55_P1971120	3.44713	2.91296	2.85598	3.10684	3.14131	3.59872	4.21516	5.46592	3.80632	3.59375	4.31518	3.44713
A_30_P01027127	4.8154	4.75658	4.51769	4.63846	5.25701	4.49388	4.69988	5.62785	4.75212	5.04941	5.12887	5.06206
A_55_P2025463	7.71618	7.52544	7.82728	7.28646	7.40541	8.11336	7.17024	7.36587	7.83309	7.56851	7.57971	7.60324
A_51_P344399	8.50858	8.51935	8.47383	8.39066	8.73326	9.1061	8.62087	8.48746	8.61529	8.7259	8.55519	8.692
A_30_P01025293	5.26172	5.51012	5.23483	5.1323	5.51538	5.41611	5.39197	5.13572	5.35866	5.60827	5.29425	5.22522
A_30_P01028064	8.14057	8.67717	8.32414	8.60173	8.60204	7.88894	8.25291	8.69447	8.12923	8.61206	8.40758	8.76663
A_55_P2013445	4.45877	4.52554	4.26915	4.96339	4.51243	4.28002	4.59931	3.85283	3.84866	4.51507	5.16115	4.11811
A_66_P127432	10.5015	10.375	10.6074	10.4406	10.454	10.1712	10.3054	10.5053	10.3912	10.548	10.3685	10.5339
A_51_P497113	3.14131	0.625731	3.97827	2.82238	3.01315	2.86426	3.14131	0.925984	3.2962	2.58254	3.44161	1.00577
A_30_P01024911	3.2962	3.46357	4.45055	4.12845	2.92883	3.47443	4.02886	4.20867	3.57873	3.83187	3.65706	3.14131
A_51_P118223	6.78396	6.79483	7.11711	6.78068	6.44416	7.17856	7.0511	6.81258	6.87332	6.93357	6.84641	6.67582
A_55_P2066478	10.7778	10.9721	10.5005	10.7206	11.0239	10.5581	10.1032	10.8739	10.6869	10.89	10.8365	11.0691
A_52_P615247	5.84105	5.69204	5.92853	5.26015	5.51538	5.65076	6.47287	6.62769	6.28522	6.54417	6.15124	6.24378
A_30_P01021009	4.26915	4.16577	4.51769	3.57873	4.47238	4.02886	4.7251	3.77153	4.33616	4.12156	3.65706	4.37434
A_30_P01018005	5.29884	5.44675	5.90264	5.21878	5.36597	5.73387	5.47946	5.57082	5.64837	5.96459	5.09761	5.39054
A_55_P2163774	15.489	15.3374	14.9188	15.2904	15.4308	14.814	14.9204	15.2904	15.4201	15.5235	15.4514	15.4465
A_55_P2225246	5.0888	5.20255	4.69988	5.1323	5.23643	5.32457	5.04941	5.21231	5.24438	5.21555	5.65076	5.74232
A_51_P110640	3.98398	4.07596	5.17119	4.26915	4.4478	4.11811	4.4615	5.31554	4.33616	4.12156	5.22683	3.81489
A_55_P2047617	4.76102	4.38876	4.30305	4.86781	4.51243	4.75435	3.7627	5.17785	4.2629	4.86575	6.12348	4.68477
A_30_P01019337	2.71203	3.16161	3.2962	3.00569	3.58375	3.47443	3.2962	4.3421	2.96007	2.12599	3.70394	3.44713
A_52_P80944	5.978	6.94874	6.07749	5.3848	5.77342	5.83895	5.83948	6.83118	6.46336	5.91265	6.1057	6.47354
A_30_P01029001	3.03532	3.26528	3.97827	3.16161	3.58375	3.2962	3.50652	1.85419	3.80632	3.59375	3.65706	4.7091
A_55_P2152991	4.76102	3.98398	4.57934	4.3272	4.51243	4.20215	4.12845	4.25033	4.40588	4.20541	5.58716	4.52293
A_30_P01020174	3.92584	3.55846	4.85541	3.95326	4.10768	3.72228	4.2629	3.77153	4.37724	4.12156	4.7091	4.37434
A_55_P2157159	9.08268	9.88084	9.79616	9.96107	9.82468	9.81427	10.0004	10.1707	9.69031	9.97273	9.61841	9.94106
A_30_P01030575	3.58124	3.67129	2.64153	3.45811	3.70394	4.72055	3.50652	4.73416	3.90993	3.83187	4.20215	5.30797
A_30_P01019833	4.96724	4.75658	4.51769	4.20215	4.73867	5.29118	5.33354	5.57082	5.03298	4.7588	5.92061	5.20418
A_52_P263024	5.26172	5.4329	5.25701	4.99201	5.23643	5.53949	5.09761	5.57082	5.35866	4.96147	5.61196	5.52716
ERCC-00108_60	3.65229	3.10684	4.19561	3.57873	3.36783	3.83187	3.87758	4.07952	3.20788	3.87758	3.32048	2.55212
A_55_P2100331	4.76102	4.55653	4.66476	4.01405	4.93026	4.75435	4.69988	4.90038	4.51243	5.03298	4.37724	5.17785
A_51_P386539	8.77311	8.42001	8.94943	8.24253	8.38258	8.68544	8.65087	8.72078	8.55966	8.2173	8.31189	7.81559
A_52_P641216	9.11989	9.05954	9.28036	8.86879	8.72462	9.48505	9.20312	9.00846	9.28485	8.96672	9.02857	8.66796
A_55_P2177941	9.8504	9.76278	10.1698	9.8488	9.74173	10.1163	9.99934	9.74887	9.94409	9.60839	9.72918	9.78833
A_30_P01022700	4.52554	4.55653	4.22162	4.3627	4.10768	4.20215	3.57873	4.6836	4.90038	4.67421	4.12845	4.82604
A_30_P01026068	5.18117	5.17785	5.06835	4.60179	4.96916	5.0033	4.59931	4.87807	5.14934	5.32607	5.32607	5.48215
A_30_P01023446	4.76102	5.09761	5.50549	4.3627	4.99578	5.25228	4.2629	5.15778	5.27575	5.25544	5.32607	4.58686
A_55_P2066329	5.52716	5.46592	5.63875	4.57682	5.60827	5.17119	5.23164	5.21231	5.57838	5.29118	5.00517	5.26797
A_30_P01024631	6.23742	6.34264	6.62373	6.31911	6.31346	6.2406	6.08902	6.08193	6.20274	6.30207	6.13977	6.4
A_30_P01028440	4.7091	5.26953	4.75658	4.63846	5.21878	5.36013	5.21231	5.04941	5.0888	5.00517	4.80469	4.85541
A_30_P01025718	4.52554	4.07596	4.88419	4.65764	4.64808	4.02886	4.86781	4.4615	4.59931	4.51507	4.42838	4.37434
A_30_P01023491	6.52471	6.25877	6.64491	6.44139	6.85422	6.44485	6.24932	6.74862	6.27788	6.45858	6.81151	7.04292
A_55_P1954346	5.09761	4.91041	6.88201	5.6686	4.95179	7.52609	7.01716	4.82392	6.04326	4.86575	4.39734	4.06881
A_51_P184062	9.58502	9.40672	9.67807	9.39948	9.14564	9.75737	9.57662	9.38521	9.62835	9.22669	9.58846	9.13873
A_55_P2119932	3.87758	3.98398	4.01405	3.39094	3.76712	3.06436	4.21516	3.77153	3.44161	4.07596	4.42838	3.75826
A_52_P28651	8.31095	8.40846	8.01094	8.12923	8.32704	8.28208	8.38312	8.49273	8.4883	8.18152	8.28949	8.25025
A_55_P2023617	5.78655	5.61196	4.80684	5.10287	5.12543	5.74232	5.31403	5.28349	6.17556	5.42173	5.4329	5.22522
A_52_P174721	3.65229	3.26528	3.97827	4.84708	3.58375	3.06436	3.50652	3.85283	0.158767	3.98398	4.2629	3.57873
A_55_P2189903	4.3421	4.48853	4.30305	4.38876	3.58375	4.49388	4.21516	4.7091	4.04716	4.57682	3.99155	3.5118
A_55_P2098840	3.87758	4.07596	4.30305	3.32048	3.44713	3.72228	2.96777	3.85283	3.69469	4.02886	3.99155	3.5118
A_30_P01033159	6.74694	7.20793	6.82695	6.36104	6.8417	7.23032	6.5403	6.84118	7.23072	6.77081	7.26474	6.70607
A_66_P133204	7.39955	7.42793	7.4614	7.17024	7.90508	7.35306	7.11537	7.98103	7.64077	7.35453	7.69603	7.39008
A_30_P01029157	3.77153	2.99819	4.45055	3.57873	4.53075	1.7864	3.57873	3.77153	4.18903	4.29081	3.75381	4.4478
A_55_P2126343	6.31346	6.68753	6.67846	6.20926	6.3419	6.12133	6.32024	6.70607	6.30588	6.52732	6.29673	6.21088
A_55_P2006210	4.26915	4.42838	6.10395	3.95326	4.47238	4.52554	3.21438	4.78302	4.59931	4.7588	4.57682	4.65287
A_55_P2074045	4.92037	4.80684	4.85541	4.54112	4.90239	5.07282	3.8234	6.4071	4.94595	5.60827	6.43654	4.20541
A_30_P01022110	4.64568	4.58686	5.0888	5.34394	4.19232	4.49388	4.3	6.06946	4.75212	4.7588	7.28839	5.60085
A_51_P443702	12.6768	12.4834	12.7063	12.374	12.3711	12.9785	12.6703	12.5139	12.6214	12.3241	12.6192	12.2156
A_55_P1976694	8.01268	7.68628	7.80648	7.79408	7.98103	7.80057	7.71188	7.70297	7.68468	7.62624	7.70239	7.89804
A_51_P239673	11.2653	11.1794	11.2711	10.9622	11.257	11.446	11.3813	11.33	11.3702	11.0591	11.2899	11.1032
ERCC-00170_100	4.58686	4.86162	5.0033	4.04716	4.81327	4.52554	4.66476	4.90038	4.59931	4.9144	4.52554	4.11811
A_51_P122246	11.9119	11.408	11.2093	11.019	11.3571	11.4262	11.373	11.4748	11.5661	11.378	11.5411	11.4075
A_30_P01030996	3.44713	4.52554	4.37724	3.5118	4.22162	4.69293	4.07952	4.6836	4.18903	4.51507	5.16115	4.47778
A_30_P01026303	3.2962	3.41368	3.75826	2.91296	3.2962	4.28002	2.48927	3.32048	3.80632	3.54308	2.27002	2.96007
A_52_P464062	6.24298	6.46063	6.82695	5.77781	6.01333	6.48029	6.42959	6.57728	6.64791	6.31119	6.44416	6.20274
A_30_P01031016	3.92584	2.4458	4.30305	3.16161	3.58375	2.27002	2.96777	3.58375	3.90993	2.81386	3.02058	3.69932
A_55_P2128499	12.848	12.6799	12.8878	12.3774	12.425	12.8597	12.8787	13.0043	12.9276	12.6659	12.8182	12.5124
A_55_P1970670	14.1622	13.7733	14.4056	13.7801	13.9923	14.5732	14.3297	13.8446	14.1197	13.7801	13.7076	13.4775
A_51_P403393	4.38013	3.98398	4.26915	3.92584	3.36783	4.11811	4.12845	4.3421	3.57873	3.09282	3.32048	4.02517
A_30_P01028409	-1.75958	3.26528	3.36783	3.68537	2.92883	1.13253	3.36783	4.11811	3.57873	-0.31833	3.02058	2.96007
A_55_P1979027	8.86047	9.00472	8.90861	8.82101	8.72618	8.87386	8.69098	8.75304	8.91647	8.91049	9.07957	8.75172
A_52_P411601	7.64198	8.25301	8.11358	7.93265	8.04206	7.69574	7.63912	7.85999	7.6232	7.99382	7.98199	7.83138
A_55_P2114736	4.38013	4.69988	4.93223	5.20255	4.99578	4.75435	4.89635	5.45363	4.87602	5.26953	5.58716	5.13572
A_55_P2264483	4.58686	4.55653	4.57934	4.48585	4.01405	4.58936	4.42838	4.96532	4.85541	4.9144	4.88622	4.52293
A_30_P01033507	3.70394	3.26528	3.87348	3.00569	4.10768	3.59872	4.02886	3.85283	3.69469	4.12156	3.99155	3.2962
A_55_P1969121	3.92584	1.95058	3.97827	3.63304	3.70394	3.44161	3.69932	4.3421	4.2629	3.59375	3.75381	2.96007
A_51_P117903	4.64568	3.55846	4.63846	4.74092	3.44713	3.20788	4.12845	5.35132	4.18903	4.51507	4.84708	3.81489
A_30_P01027623	5.35132	5.23483	5.76681	5.4048	5.85566	4.91041	4.96916	6.81258	5.76902	5.86187	5.66623	5.4495
A_51_P511707	9.21445	9.19483	9.17739	9.05299	8.81842	9.05492	9.32059	9.30143	9.27027	9.02776	9.19062	9.03179
A_55_P1957378	10.9446	10.7869	10.5248	10.5702	10.3614	10.7486	10.701	10.2763	10.7966	10.368	10.4217	10.128
A_55_P2019428	3.58124	4.24716	3.87348	3.78903	4.7068	4.42838	4.02886	4.13873	4.2629	4.57682	4.06522	4.11811
A_55_P2146783	7.24506	6.93013	7.48071	7.00036	6.6533	8.22897	8.00919	7.16522	8.14843	7.42618	7.43593	6.85422
A_51_P303868	5.33354	4.80684	4.95567	4.45877	4.51243	4.65525	4.52815	5.21231	4.92037	5.32607	4.66476	5.50218
A_52_P64514	5.27885	5.69204	5.69088	4.94595	5.46592	5.41611	5.35279	5.86187	5.39054	5.97896	5.92951	5.50218
A_55_P2181071	14.0567	14.0979	13.8053	14.0618	14.1563	12.6241	13.7704	14.0959	13.9123	13.9237	13.9314	14.1571
A_51_P441745	5.63875	5.82417	6.12822	6.79834	6.90827	5.99883	6.1768	7.93866	5.98086	6.57476	6.4	6.59324
A_30_P01032378	4.30305	4.93026	5.63875	4.86781	4.90239	4.69293	4.4615	5.3848	4.96339	5.03298	4.84708	5.58215
A_65_P19784	9.63789	9.68787	9.62482	9.57292	9.57051	9.53493	9.6301	9.55061	9.2999	9.41096	9.50596	9.53274
A_66_P129355	5.47811	5.76571	5.81886	5.77781	5.73669	5.88138	5.91862	5.76128	5.76128	5.92853	5.34394	5.82735
A_30_P01025415	7.15725	7.41566	7.11711	6.76031	6.80669	7.11016	6.8952	7.48071	7.03285	7.20162	7.03056	7.18312
A_55_P2143859	3.20788	3.88166	3.69932	3.16161	3.58375	3.44161	3.63787	3.58375	3.50652	5.7646	3.83187	6.98193
A_30_P01021488	3.87758	3.55846	3.92584	3.26528	4.33913	3.06436	3.14131	3.47443	3.90993	2.81386	3.92188	4.52293
A_55_P2220283	7.5902	7.70657	7.40364	7.70282	7.66349	7.58645	7.4015	7.77678	7.54939	7.60541	7.87799	7.75788
A_55_P1955300	5.13914	5.08704	5.46999	5.34394	5.57587	5.36013	5.23164	5.81031	5.4982	5.55044	5.35866	5.66623
A_55_P2094277	4.30305	4.45877	4.63846	4.3627	4.51243	4.88419	4.2629	4.20867	4.77645	4.4478	4.69293	4.29081
ERCC-00084_121	3.65229	4.07596	3.97827	3.57873	4.26915	3.36199	4.3	4.63362	4.01033	4.37434	3.92188	3.69932
A_65_P03022	7.85584	7.95753	7.87159	7.61709	7.60355	7.97149	7.61984	7.7551	7.95777	7.78892	8.05319	7.35636
A_55_P2427900	4.67891	4.86162	4.95567	4.63846	5.2742	4.20215	5.03114	5.04941	4.9939	4.70219	5.16115	4.55397
A_51_P385812	4.12845	3.67129	3.92584	2.63187	3.8234	3.59872	2.85598	4.40019	3.69469	3.16161	4.88622	4.11811
A_52_P533129	2.71203	3.67129	3.97827	2.70744	3.14131	2.43473	2.96777	4.18903	4.01033	2.99819	4.16577	3.6427
A_55_P2069729	9.48681	9.14378	9.50422	9.21965	9.28567	9.74552	9.32664	9.11176	9.56461	9.10304	9.2293	9.00659
A_30_P01021659	3.65229	4.07596	4.34506	4.12845	4.7068	4.11811	4.02886	4.7588	4.18903	4.7588	3.83187	3.81489
A_51_P213099	6.64191	6.65449	6.78614	7.02595	6.32325	6.77411	6.88354	6.82695	6.61333	6.97883	7.2237	6.46131
A_30_P01031173	2.19325	-0.170805	3.75826	-1.31281	3.92188	2.66067	0.81172	4.07952	1.88705	2.91296	2.65113	3.5118
A_30_P01024843	3.44713	2.18004	4.05441	3.82764	3.961	3.47443	2.75274	3.77153	3.50652	3.92979	3.59375	3.81489
A_51_P247481	9.52624	9.58752	9.74061	9.53132	9.3534	9.84737	9.77023	9.61519	9.52791	9.54607	9.49833	9.33145
A_30_P01024522	4.96724	5.16283	5.04759	5.27885	4.90239	4.69293	4.75658	5.88698	5.14934	5.39911	5.39126	4.80469
A_55_P2018091	14.1334	14.0243	13.7491	13.8422	14.041	13.8702	13.5991	13.9123	14.0668	13.9936	14.1385	14.0371
A_51_P126302	5.4632	5.74007	6.25955	4.99201	5.32757	5.51012	5.69321	5.86187	5.20906	5.5934	6.04508	5.41046
A_30_P01018620	8.40368	8.3681	8.97319	8.83694	8.88687	8.3485	8.71607	8.75304	8.54605	8.7389	8.56562	9.26168
A_51_P116687	5.29884	5.12887	5.04759	4.99201	5.08704	5.13401	5.31403	5.21231	5.0888	5.43568	5.17785	5.72878
A_30_P01026677	3.14131	3.55846	3.75826	3.78903	3.14131	3.56356	3.04991	4.37724	3.57873	3.54308	3.65706	4.02517
A_55_P2083093	7.56725	7.58175	7.4981	7.4439	7.40541	7.59984	7.70412	7.52838	7.5902	7.21786	7.51726	7.25533
A_52_P553013	5.222	4.64087	5.25701	4.6906	5.04578	5.55556	4.9479	5.00517	5.24438	4.96147	5.42173	5.46592
A_55_P2015715	9.42336	9.28311	9.24756	9.30385	9.20526	9.32809	9.26657	9.18526	9.34029	9.11279	9.30618	9.12232
A_30_P01023617	6.98715	6.78095	7.01437	6.94971	7.01809	7.1604	6.95408	7.24109	6.98715	7.06822	7.17732	7.31958
A_55_P2157838	12.427	12.4423	12.5613	12.7486	13.0689	12.5547	12.4635	12.7425	12.3662	12.7056	12.772	12.8352
A_66_P139196	6.44416	6.44485	6.88201	6.79834	6.93406	6.94728	6.11873	6.55699	6.95916	6.88456	7.54118	6.82695
A_30_P01030929	6.08946	6.32587	6.17139	6.37015	5.94326	5.95493	5.96555	6.20519	5.66505	5.90364	6.1057	6.50035
A_52_P300730	5.69437	4.93026	5.1323	5.17785	5.42032	5.0033	5.49953	5.35132	5.83316	5.09057	6.23742	5.35132
A_51_P274259	5.41329	4.24716	5.11159	4.6906	4.96916	5.52716	5.09761	5.51012	5.17119	5.25544	5.58716	5.42872
A_52_P138967	7.00036	7.17566	6.78614	7.12574	6.96037	6.89369	6.90225	7.13432	6.86458	6.95456	7.15303	7.13175
[truncated: 53,824 more rows]
