# Supplementary material for: Co-expression network analysis identified hub genes critical to triglyceride and free fatty acid metabolism as key regulators of age-related vascular dysfunction in mice
Source: Aging (Albany NY). 2019 Sep 12;11(18):7620–38. doi: 10.18632/aging.102275 (PMC6781998; doi:10.18632/aging.102275)
Supplement: Supplementary Table 2 [file aging-11-102275-s015.xlsx]

## Sheet: Sheet1
Supplementary Table 2. Differentially expressed genes with p-value < 0.05 between 6 and 20 months old mice
substanceBXH	aorta-6m-rep1	aorta-6m-rep2	aorta-6m-rep3	aorta-6m-rep4	aorta-6m-rep5	aorta-6m-rep6	aorta-20m-rep1	aorta-20m-rep2	aorta-20m-rep3	aorta-20m-rep4	aorta-20m-rep5	aorta-20m-rep6
MMT00011649	4.76102	4.75658	4.75658	4.94595	4.64808	4.63241	4.9479	5.07817	4.87602	4.96147	4.6239	4.40304
MMT00042963	5.86239	5.83895	5.91265	5.70363	6.0286	5.52716	5.69321	5.04941	5.68739	5.5934	5.61196	6.05687
MMT00034448	4.61902	4.64087	4.69988	4.3272	3.961	4.35977	4.89635	4.78302	5.24438	4.81327	4.75658	4.82604
MMT00063550	9.03649	9.06112	8.70084	9.24216	9.30632	8.6325	8.51706	8.90686	8.73044	8.88782	8.95671	9.08434
MMT00037979	5.52716	4.24716	5.50549	4.38876	5.15947	4.58936	3.7627	4.87807	4.04716	4.02886	4.84708	3.92584
MMT00027193	7.34587	7.19384	7.262	7.32858	7.60957	7.04633	6.98715	6.90426	7.19055	7.13987	7.39705	7.3764
MMT00018843	5.79632	5.46592	5.81886	5.85773	6.74358	5.30797	5.35279	4.52293	4.66239	4.67421	4.96916	4.99578
MMT00059280	5.05485	5.92951	4.85541	4.6906	4.53075	5.52716	5.56828	6.17139	5.20906	6.15377	5.83895	5.20418
MMT00063533	6.05054	4.95567	5.7909	5.42453	4.99578	6.33372	6.503	6.31572	7.13561	6.4	5.96411	5.30797
MMT00010083	3.70394	3.26528	3.50652	3.32048	3.70394	3.59872	3.44713	3.26528	2.49994	2.91296	4.02886	3.6427
MMT00044065	5.26172	5.56955	5.36743	5.70363	5.45225	5.46592	5.78655	5.93148	5.43568	5.7646	5.29425	5.24596
MMT00033205	4.86781	4.45877	4.85541	4.7091	4.64808	5.09057	5.60085	5.13572	5.07282	4.93813	4.42838	4.85541
MMT00012362	7.91245	7.46378	7.34087	6.83012	7.99971	7.41706	8.07888	7.71732	8.30526	7.78892	7.83362	7.73915
MMT00079177	5.3848	5.58215	5.67332	5.8421	5.66505	5.6792	5.46592	4.96532	5.07282	5.13487	5.0888	5.76128
MMT00000858	9.81169	9.51334	9.63407	9.55273	9.66554	9.29603	9.85043	9.70511	9.76662	10.005	9.64098	9.54808
MMT00024699	4.58686	4.38876	4.30305	4.86781	4.33913	4.56671	4.63846	4.87807	4.69757	4.81327	4.2629	3.87348
MMT00048973	10.1614	10.3838	10.0101	9.94604	10.1099	10.8177	10.8102	11.1142	10.6189	10.8411	10.9156	10.7619
MMT00018127	8.23756	7.82118	7.81345	8.23706	8.15266	7.53325	7.75008	7.82051	7.65963	7.61433	8.16601	8.04661
MMT00012338	7.67765	7.8415	7.70441	7.75329	7.72075	7.45319	7.39759	7.44217	7.41917	7.54939	7.64453	7.63141
MMT00009429	2.95232	2.69821	3.14131	1.37096	1.19539	3.47443	3.7627	3.69469	4.04716	2.99819	3.7977	3.14131
MMT00012971	9.00595	8.81915	9.41114	8.97474	8.16339	9.01823	9.78867	8.89674	10.0856	9.40596	9.04311	8.70984
MMT00018414	2.47853	3.98398	2.64153	3.32048	3.65229	2.66067	4.02886	3.92979	3.80632	3.59375	2.16001	2.27002
MMT00015542	4.12845	4.42838	4.30305	4.20215	4.33913	3.98398	4.78302	5.13572	4.66239	5.11506	4.52554	4.20541
MMT00033261	5.39769	5.08704	5.4048	5.30341	5.08704	5.26953	5.56828	5.60085	5.53885	5.39911	5.06745	5.48215
MMT00027774	3.92584	4.3212	4.69988	3.82764	4.47238	4.07596	3.57873	3.26528	3.69469	4.12156	4.12845	3.69932
MMT00067891	9.81723	9.67917	9.96122	9.39948	9.93822	9.82719	10.2269	9.98731	10.1493	9.98334	10.0024	10.05
MMT00082385	7.26552	6.94581	7.08182	6.81525	6.81312	7.25336	7.48642	7.2126	7.50606	7.05472	7.19548	7.08071
MMT00031654	6.34634	6.70319	6.54417	6.24219	6.09034	6.47354	6.62556	6.65449	6.74077	6.81579	6.54481	6.54802
MMT00027214	3.98398	3.55846	3.50652	2.91296	3.92188	4.11811	3.04991	2.43473	3.50652	3.26528	3.92188	3.92584
MMT00055480	4.38013	4.48853	4.72283	4.38876	4.19232	4.49388	3.92584	3.58375	4.47238	4.12156	4.57682	4.52293
MMT00030404	10.4333	9.95461	10.7485	9.91729	10.1502	10.2826	10.8544	10.5768	10.8631	10.367	10.4656	10.526
MMT00009050	6.03916	5.96459	5.9894	5.70363	6.05235	5.66623	5.55044	5.31554	5.74007	5.89053	5.90264	5.97991
MMT00081212	2.95232	2.69821	3.36783	2.82238	2.4458	3.36199	3.2962	3.77153	3.36199	3.46357	2.43473	2.75274
MMT00030541	10.444	9.93963	10.0351	9.64617	9.94723	10.4652	10.4115	10.8294	10.8631	10.7267	10.9132	10.745
MMT00017146	3.87758	4.02886	3.44161	3.95326	4.26915	3.83187	3.44713	2.99819	4.01033	3.16161	4.31518	4.02517
MMT00011648	4.45877	4.35977	3.75826	4.6906	4.26915	4.11811	4.02886	3.63787	4.01033	3.16161	4.06522	4.20541
MMT00018095	4.08307	4.38876	4.22162	4.65764	4.67891	4.65525	3.36783	4.73416	3.69469	3.92979	5.06745	4.16242
MMT00012342	6.26816	6.25877	5.59091	5.63754	5.94326	6.41557	6.82854	7.67221	6.70319	7.13518	7.33883	7.17815
MMT00082420	7.477	7.00551	8.14206	7.43905	7.21584	7.59394	7.49478	7.90005	8.26849	8.14556	7.60355	7.53098
MMT00080603	9.94372	8.88057	9.91163	9.76326	9.85894	9.38692	8.63674	8.81822	9.12339	9.04403	9.22166	9.13419
MMT00068279	9.74853	9.51925	9.14389	8.72206	8.76932	9.43339	9.72897	10.3828	10.2763	10.1368	10.4354	10.1363
MMT00059097	10.9192	10.3763	10.5017	10.4804	10.3614	10.4769	11.0397	10.4196	10.967	10.67	10.4109	10.248
MMT00043257	4.45877	4.24716	4.05441	3.10684	3.58375	4.65525	3.57873	2.99819	2.96007	2.99819	3.65706	2.96007
MMT00072505	4.18242	4.07596	4.01405	3.78903	3.58375	3.72228	4.02886	4.4615	4.2629	4.29081	3.32048	3.2962
MMT00031546	8.11802	8.43927	7.81345	7.49877	8.41623	9.11127	8.89137	9.24939	8.90222	8.78269	8.68486	8.67055
MMT00056119	7.46071	7.90871	7.82091	7.63685	7.55227	7.73125	7.98697	8.08431	8.00088	7.72757	7.5902	7.55771
MMT00053386	5.3848	4.86162	5.25701	5.26015	4.81327	5.4329	5.31403	5.6792	5.60827	5.49953	5.21231	5.30797
MMT00059295	10.8843	10.8813	10.8879	10.9076	10.9402	10.7781	10.6076	10.7784	10.745	10.6782	10.8937	10.793
MMT00045956	6.77191	6.65449	7.4614	6.503	6.42749	6.68402	7.14434	7.10143	7.44217	6.93799	6.79212	6.50035
MMT00030162	3.8234	3.59375	3.20788	3.57873	3.44713	3.83187	4.12845	3.92979	3.90993	4.37434	2.95232	3.21438
MMT00079309	4.02886	4.07596	4.69988	4.12845	4.51243	3.2962	2.85598	4.13873	3.36199	3.46357	4.57682	4.25033
MMT00042016	2.95232	2.4458	3.20788	3.10684	2.69821	1.37096	4.7251	3.85283	3.2962	2.91296	3.16161	2.96007
MMT00079541	8.80799	8.57124	8.33897	8.69142	8.69918	8.14099	7.94441	8.29228	7.99217	8.15709	8.23895	8.05297
MMT00025100	12.0888	12.1743	11.825	11.8875	11.891	11.9426	11.606	11.9027	11.6632	11.7901	12.0075	11.9342
MMT00044688	5.66623	5.88443	6.05144	5.77781	5.63512	6.55699	6.75085	6.36104	6.24298	5.97896	5.29425	5.42872
MMT00019015	4.30305	4.02886	4.22162	4.76544	4.33913	4.24399	4.02886	3.85283	3.57873	3.87758	4.59683	4.4478
MMT00021452	3.92584	4.3212	4.01405	3.5118	3.8234	3.92979	2.48927	1.85419	3.80632	3.83187	3.65706	3.44713
MMT00020204	8.55023	8.90686	8.8395	8.77379	8.9851	8.91784	9.28142	9.21798	8.83128	9.11643	8.75763	9.08118
MMT00023604	4.02886	3.88166	3.50652	4.20215	3.58375	4.20215	3.69932	2.66067	3.74935	3.59375	3.92188	4.16242
MMT00034019	6.13079	7.12035	6.93456	6.78068	6.68461	6.38209	6.1768	7.64948	8.15856	7.86902	7.17274	6.7978
MMT00055921	12.3677	11.8991	11.4665	11.3887	12.1823	12.2673	12.4656	12.4772	12.6956	12.2854	12.4621	12.2825
MMT00063663	5.12887	4.86162	4.48317	4.20215	4.47238	4.35977	4.69988	5.26485	5.60827	5.1561	4.6239	4.3272
MMT00056355	3.36783	3.26528	3.03532	2.91296	3.44713	2.27002	4.12845	3.14131	3.94937	3.71772	2.85598	3.14131
MMT00023471	9.85534	9.34492	10.3206	9.51025	9.55609	9.6529	10.4795	9.87112	9.97721	9.93822	9.75612	9.7133
MMT00073282	7.01437	6.64221	7.39295	7.12574	7.0878	6.92271	7.58614	7.06553	7.42513	7.26474	6.994	7.08071
MMT00025515	5.13914	4.69988	5.80602	4.86781	5.09761	5.4329	4.7251	4.78302	4.82604	4.51507	5.19272	4.82604
MMT00044207	6.25523	6.67875	6.61333	6.59914	6.6078	5.88138	5.51407	6.10133	6.27788	6.17223	6.4	6.59324
MMT00080429	5.3848	5.17785	6.21695	5.7909	5.85566	5.63754	6.07571	6.06048	6.41134	6.15377	6.31497	5.88036
MMT00037697	6.28445	6.16638	6.38209	6.4	6.37414	6.17971	6.10001	6.01287	5.78655	5.96459	6.47354	5.89457
MMT00039835	1.7864	3.98398	2.75274	2.47853	3.58375	3.06436	3.87758	3.47443	4.2629	4.02886	2.65113	2.66067
MMT00079011	6.20763	6.43793	6.45995	6.03595	6.0286	6.3419	6.5477	6.41698	6.57539	6.58981	6.47354	6.25877
MMT00037977	9.67587	9.68469	9.36666	9.60535	9.1207	9.78622	8.87649	9.13205	9.45411	9.46478	9.55992	9.7173
MMT00017876	9.83991	9.39788	9.70237	9.39681	9.29646	9.72265	9.94945	9.93589	9.97009	9.74075	9.71065	9.684
MMT00011746	9.42939	9.60989	9.58752	9.46206	9.61645	9.09702	9.35455	9.05152	8.90523	9.02113	9.27329	9.15184
MMT00000570	8.5595	9.53736	9.35331	9.25077	9.11458	8.94627	9.11816	9.72918	10.2542	9.69441	9.60781	9.48866
MMT00028633	8.50263	8.4112	8.14206	7.67176	6.98715	8.00662	8.68683	8.70675	8.93157	8.29457	8.67878	8.27103
MMT00028910	6.72096	6.69393	5.978	6.37015	7.01809	6.71525	5.99507	6.14615	5.95105	6.02399	6.13251	6.28791
MMT00038326	4.21516	4.07596	4.51769	4.74092	4.90239	4.65525	5.09761	4.7588	4.9939	4.8387	4.22162	4.93813
MMT00055270	6.41909	5.92951	5.978	5.32157	6.13807	6.04144	6.85526	6.18963	6.82085	6.15377	5.88036	5.8515
MMT00060105	3.92584	3.10684	2.75274	3.95326	3.2962	3.47443	3.69932	3.38519	4.18903	4.7588	2.95232	3.37364
MMT00041665	2.19325	2.69821	1.83762	3.5118	3.2962	2.27002	3.8234	3.77153	3.69469	3.32048	3.37943	3.44713
MMT00015355	3.58124	3.71772	2.85598	4.09014	3.8234	2.86426	4.38876	4.57934	3.80632	4.29081	3.56356	3.81489
MMT00017475	5.01078	4.3212	4.6092	4.45877	4.7068	5.38047	4.38876	3.90592	4.51243	4.20541	4.37724	4.65287
MMT00029403	6.51225	6.31005	6.59044	6.17139	5.7468	7.18993	7.2403	6.81258	6.87332	6.59728	6.35076	6.10395
MMT00028973	3.2962	3.26528	3.63787	3.78903	3.70394	3.92979	4.59931	4.52293	3.80632	3.98398	3.7977	3.5118
MMT00078575	3.70394	4.07596	3.44161	3.95326	3.961	4.02886	4.21516	5.90062	3.80632	4.16577	3.92188	3.2962
MMT00051144	6.65628	6.55954	7.19014	6.75197	6.68461	6.98098	6.60903	6.43307	6.58293	6.54417	6.87281	6.70607
MMT00018370	3.2962	3.77592	4.45055	4.52031	4.4478	3.06436	2.75274	4.07952	3.2962	3.16161	4.22162	4.3272
MMT00011158	5.71854	7.7126	5.33354	5.46183	5.54787	7.36112	9.37927	7.70023	6.19292	7.26004	6.51685	7.24941
MMT00067646	7.86077	7.73323	7.39812	7.4439	8.22827	8.01617	8.28978	8.40846	8.38744	8.25419	7.93142	8.23337
MMT00074585	3.58124	3.98398	3.92584	3.78903	4.33913	3.83187	3.8234	4.73416	4.40588	4.37434	4.02886	3.69932
MMT00058927	4.52554	4.16577	4.13873	3.78903	4.22162	4.56671	3.44713	4.28466	3.69469	3.77153	4.31518	4.20541
MMT00058358	4.18242	3.88166	3.36783	3.78903	3.92188	3.83187	3.92584	3.98017	4.80469	4.47238	3.56356	3.44713
MMT00020287	6.20763	6.58794	6.43307	6.05054	6.26034	5.81726	7.29816	6.77356	6.32775	6.49503	6.20233	6.23582
MMT00034980	4.64568	4.38876	4.26915	5.1323	3.8234	3.59872	3.57873	4.20867	3.57873	3.32048	4.20215	4.11811
MMT00005022	7.8864	7.72075	7.58081	7.35159	7.80944	7.47125	7.38937	7.20814	7.24941	7.31676	7.2237	7.48608
MMT00042972	10.4402	10.426	10.7741	10.3632	10.2676	10.7124	10.7372	10.5563	10.8355	10.691	10.4989	10.3798
MMT00014701	6.87435	6.83724	6.72835	6.91675	6.70607	6.63557	6.27826	6.52471	6.44898	6.27749	6.503	6.78886
MMT00053670	5.41329	5.71511	5.65911	5.4048	4.53075	6.04144	6.34892	5.66623	6.60718	5.89053	5.78873	5.33205
MMT00078723	9.65021	9.72151	9.84299	9.45676	9.76837	9.6713	9.88403	9.88237	10.0063	9.98132	9.93576	9.64557
MMT00049421	7.02756	6.42959	7.36878	6.84222	6.17971	6.97095	7.45832	7.73985	7.09309	6.69567	6.94581	6.65628
MMT00082376	8.91908	8.9344	9.00349	8.80464	8.98866	8.79004	9.19109	9.15194	9.40941	9.20699	9.12242	9.29302
MMT00024387	3.58124	3.67129	3.57873	3.16161	3.76712	3.78903	1.37096	2.19325	3.69469	2.58254	3.65706	3.14131
MMT00012907	7.37387	7.37658	7.34087	7.74112	7.56725	6.96037	6.83645	7.05833	7.09309	7.41706	7.77005	7.44769
MMT00067789	4.12845	4.28466	4.57934	4.94595	4.40588	4.58936	4.42838	3.14131	3.74935	4.02886	3.92188	4.55397
MMT00069681	7.64978	7.57515	7.70441	7.86799	7.60355	6.8687	6.7664	6.994	7.29606	7.56121	7.66497	7.4901
MMT00012212	5.553	5.66623	5.43568	5.27885	5.54787	5.74232	5.64717	5.94326	5.78655	5.7909	5.53237	5.56194
MMT00049221	9.38188	9.62934	9.44913	9.24216	9.36757	9.63146	9.71752	9.94793	9.93779	9.78223	9.64433	9.8264
MMT00046994	9.71251	9.96901	9.80814	9.90603	9.67902	9.71444	10.0405	10.1165	9.93858	10.0633	9.99104	9.98559
MMT00080956	6.41311	5.88443	5.87422	5.87422	5.89558	6.16093	7.23112	6.29673	6.28522	6.41557	6.26894	6.2222
MMT00014813	8.8668	9.19288	8.86905	8.29649	8.64757	8.25793	9.93546	9.52236	8.59724	8.95804	8.78542	8.70127
MMT00054089	7.46344	6.8417	7.26708	6.70636	6.72835	7.12574	7.51726	7.23652	7.38398	7.39866	6.93946	6.90877
MMT00073254	7.55771	7.80702	7.88906	7.43194	8.01234	7.80702	7.85753	8.21001	8.30905	8.19921	8.10444	8.13715
MMT00014082	2.95232	4.02886	4.37724	4.3272	3.92188	3.72228	3.8234	3.38519	2.96007	1.7864	4.64568	3.37364
MMT00019155	4.64568	4.45877	3.97827	4.7091	4.53075	4.80469	3.57873	4.13873	4.53853	3.92979	5.0888	4.82604
MMT00022926	6.31346	6.13165	5.978	5.83264	5.93148	6.0286	6.23901	6.75475	6.80454	6.64311	6.51685	6.41768
MMT00047914	3.8234	4.3212	4.05441	3.78903	4.33913	4.35977	4.3	4.4615	4.66239	4.81327	4.55141	4.29081
MMT00035299	3.58124	4.02886	3.03532	2.82238	3.44713	4.69293	3.69932	1.85419	3.14131	1.4913	3.56356	4.11811
MMT00011298	10.7934	10.9111	9.94945	10.6604	10.7779	10.2588	11.0233	11.3158	11.6057	11.4287	11.446	11.4731
MMT00011651	4.30305	4.75658	3.97827	4.45877	3.92188	4.28002	5.00142	5.28349	4.82604	4.67421	4.80469	5.04578
MMT00070222	8.63991	8.6113	8.45905	8.30412	8.62034	8.48344	8.89251	8.92311	9.21743	9.19278	9.03912	8.93385
MMT00082736	3.8234	3.92979	3.69932	2.82238	4.26915	3.59872	3.2962	2.43473	2.75274	2.99819	3.16161	3.75826
MMT00065808	3.2962	3.46357	3.97827	3.39094	3.70394	3.92979	3.2962	2.19325	2.96007	3.54308	3.32048	3.69932
MMT00059245	7.81665	7.7551	7.2399	7.19445	7.40878	7.75816	7.93609	8.29362	7.95994	7.83467	8.15709	7.85403
MMT00078249	7.39955	7.9067	7.51184	7.49411	7.55227	7.40346	7.84255	7.92994	7.8649	7.94514	7.7253	7.81225
MMT00002362	4.64568	4.75658	4.95567	4.94595	4.83449	4.75435	5.23164	4.85541	5.18943	5.13487	4.75658	4.6239
MMT00044933	5.81459	5.83895	5.54014	5.7468	5.77342	5.55556	5.92951	5.95493	6.03228	5.7909	5.54787	5.58215
MMT00067186	6.56018	6.39715	6.72039	6.59044	6.50035	6.63557	8.4821	6.97406	6.86458	6.5589	6.37704	6.4
MMT00026709	7.0248	6.67875	6.74526	6.72096	7.37893	6.62739	6.1768	6.51225	6.33596	6.56527	6.52504	6.84118
MMT00005510	8.43598	8.01501	7.87364	7.9003	8.2171	8.41614	8.82605	9.13376	8.74935	8.53362	8.86931	8.64202
MMT00027892	2.95232	3.71772	1.71521	2.82238	2.4458	2.96777	3.92584	3.32048	3.57873	3.71772	2.65113	2.55212
MMT00049862	4.18242	4.3212	4.48317	4.12845	4.37724	4.07596	2.75274	3.58375	4.01033	4.29081	4.20215	4.37434
MMT00070618	5.04578	4.88419	5.06835	4.38876	5.01264	5.04941	5.23164	5.07817	5.24438	5.17452	4.66476	4.68477
MMT00014165	6.32924	6.29367	6.18468	6.06318	5.95493	6.6711	6.48701	6.53803	6.6413	6.35847	6.23742	5.97991
MMT00013511	3.58124	2.80528	2.38955	1.68799	2.69821	3.36199	4.02886	4.40019	3.50652	3.71772	2.54183	2.96007
MMT00047418	7.40895	7.5326	7.54521	7.01437	7.39955	7.32858	7.79042	7.83783	7.91868	7.91395	7.94502	7.7739
MMT00062400	10.385	10.2789	10.2562	10.2396	10.4895	10.2693	10.3847	10.5095	10.7061	10.6069	10.4393	10.4963
MMT00060589	3.70394	3.41368	3.36783	3.95326	3.01315	3.2962	4.38876	4.6836	4.01033	4.70219	3.70394	3.92584
MMT00034690	8.87264	8.22787	8.62643	7.89678	8.5196	8.6022	8.9998	8.64051	8.9657	8.69983	8.66419	8.56459
MMT00032657	4.52554	3.77592	5.01822	4.6906	4.33913	4.38876	5.60085	5.21231	4.51243	5.30797	4.6239	5.06206
MMT00048836	7.0878	6.18468	6.17139	5.92951	6.68461	6.88099	7.03606	6.82695	7.11624	6.71868	6.64191	6.62739
MMT00060071	7.35159	7.35343	7.19466	6.76031	7.3847	7.34384	7.59394	7.65605	7.63806	7.32221	7.00458	6.92321
MMT00035724	5.222	4.72283	4.57934	4.84708	5.63512	5.17119	4.66476	3.72683	4.72055	4.4478	5.00517	4.6239
MMT00015239	4.52554	4.20541	4.51769	4.12845	4.33913	4.56671	4.83975	5.13572	4.87602	4.9144	5.06745	4.58686
MMT00033228	8.47671	8.18617	8.83418	8.27647	8.24907	8.4718	9.15384	8.63674	8.72562	8.71621	8.31812	8.51188
MMT00078239	6.73288	6.86715	6.32024	6.2222	6.57979	6.64911	6.92815	7.07938	6.91675	6.72381	6.80508	6.68402
MMT00009738	4.08307	3.46357	3.2962	3.78903	3.58375	4.15906	4.38876	4.4615	4.10069	3.71772	2.43473	3.14131
MMT00027755	4.21516	4.16577	3.50652	4.45877	4.37724	4.15906	3.2962	4.11811	3.50652	3.41368	4.28774	3.98017
MMT00055430	5.79632	6.0286	5.78	5.90264	5.45225	5.86187	6.10001	5.84837	6.43446	5.95299	5.45088	5.76128
MMT00063470	3.8234	3.77592	3.50652	3.82764	3.58375	3.36199	2.75274	3.20788	2.75274	3.32048	3.32048	2.96007
MMT00066381	1.7864	2.4458	3.87348	3.45811	3.14131	2.12599	3.44713	3.90592	3.94937	2.99819	3.16161	1.45935
MMT00021096	7.48441	7.03056	7.66793	7.23392	7.06508	7.88131	7.91083	7.90733	7.82781	7.35453	7.57136	7.33865
MMT00009027	8.45529	8.59421	8.66471	8.50635	8.81448	8.40678	8.52254	9.25466	8.9657	8.70653	8.47417	8.63681
MMT00038397	5.13914	4.97491	4.57934	4.89837	4.33913	4.69293	4.59931	4.20867	4.63846	4.20541	5.12887	4.74541
MMT00058633	2.71203	3.67129	3.44161	4.26915	4.05441	3.72228	4.38876	4.28466	4.22162	5.00517	3.87758	4.11811
MMT00057404	9.50744	9.59652	9.71909	9.70522	8.70091	9.38355	9.67152	9.8612	9.73959	9.77202	9.21814	9.07751
MMT00013664	4.30305	4.24716	3.97827	3.92584	3.36783	4.02886	3.57873	3.38519	3.57873	3.32048	3.65706	4.3272
MMT00080309	4.02886	4.58686	3.63787	4.45877	3.87348	5.58341	4.34506	2.85598	3.2962	3.83187	4.31518	4.40304
MMT00037025	7.66615	7.45473	7.7706	7.11927	7.32409	7.64649	7.67206	7.87364	8.02693	7.88309	7.85455	7.79435
MMT00030601	3.92584	3.98398	3.03532	3.45811	1.19539	3.68069	4.2629	3.69469	4.22162	4.20541	3.7977	3.57873
MMT00039721	6.85837	6.17556	7.54134	6.38065	7.18395	6.56907	6.76031	7.76536	7.64694	7.30711	6.994	7.06957
MMT00021946	4.76102	5.21878	4.72283	4.7091	4.95179	4.52554	4.07952	3.92979	4.10069	4.02886	4.06522	4.3272
MMT00035113	5.33354	4.61902	5.57587	5.46183	5.09761	5.90464	6.01937	7.24109	6.24298	5.84628	5.42173	4.93813
MMT00053102	6.36469	6.29367	6.05144	5.60085	6.06498	6.07749	6.4445	7.02549	6.72835	6.94874	7.11711	6.82695
MMT00047610	4.96724	4.20541	5.17119	4.04716	4.33913	4.49388	2.19325	2.85598	0.81172	0.897474	3.49056	2.55212
MMT00057059	5.36743	4.97491	4.5437	4.52031	4.85955	5.17119	5.14255	5.33354	5.57838	5.49953	5.30949	5.22522
MMT00036564	5.58215	5.61196	5.17119	5.17785	5.20255	5.52716	5.99507	5.62785	5.63512	5.45637	5.29425	5.22522
MMT00065715	6.05054	6.09343	6.5979	6.20926	7.20732	6.70319	6.55954	7.16878	7.4109	6.64911	6.15124	6.67582
MMT00071500	5.62785	5.85046	5.88748	5.17785	5.51538	5.6792	6.00446	6.29673	5.93738	6.15377	6.02722	6.00446
MMT00072394	4.08307	4.69988	4.51769	4.12845	4.40588	3.59872	4.66476	5.15778	4.51243	5.03298	4.57682	4.65287
MMT00010142	12.7078	13.1227	12.5298	12.5064	11.7877	12.7153	12.9871	13.1844	13.0952	13.1798	13.0127	12.9042
MMT00076717	5.01078	5.553	5.34985	5.51801	5.42032	5.11506	5.04941	5.09409	5.11159	5.00517	5.30949	5.42872
MMT00036250	9.35069	8.0612	7.35085	8.02727	8.86467	8.36108	10.3126	8.77324	9.50959	8.99438	9.14166	9.19196
MMT00008784	11.8608	12.1538	12.2071	12.09	11.961	11.7561	12.3338	12.4222	12.5604	12.4656	12.4554	12.4994
MMT00080352	5.33354	5.553	5.57587	5.32157	5.09761	5.13401	5.04941	5.03298	5.0888	4.70219	5.97705	5.58215
MMT00075488	4.86781	4.97491	4.69988	4.57682	4.37724	4.58936	5.27497	4.40019	5.33205	4.98538	4.6239	4.11811
MMT00022062	4.02886	4.3212	4.30305	4.52031	3.76712	4.58936	3.14131	3.58375	3.14131	4.20541	4.2629	4.52293
MMT00081498	4.52554	4.3212	3.63787	4.45877	4.22162	3.83187	3.2962	2.43473	3.90993	3.92979	4.06522	3.57873
MMT00037307	3.77153	4.07596	3.50652	4.01405	4.37724	4.49388	4.4615	4.63362	4.3	4.20541	3.32048	3.57873
MMT00054240	3.2962	3.10684	3.20788	3.10684	3.2962	2.43473	4.3	3.38519	3.57873	3.59375	3.1138	2.75274
MMT00041317	2.85182	4.02886	3.92584	4.04716	3.961	3.56356	4.4615	4.57934	3.80632	4.4478	2.65113	3.14131
MMT00025695	4.38013	4.12156	4.69988	3.63304	4.78738	3.47443	4.12845	4.92037	5.35866	4.7319	4.34506	4.16242
MMT00054409	9.04698	9.22518	8.94065	9.03923	8.89371	8.95671	9.34806	9.42344	9.13269	9.25854	9.00431	9.13065
MMT00043465	4.12845	4.75658	3.03532	4.52031	4.53075	3.98398	3.14131	3.26528	3.74935	3.59375	3.16161	4.37434
MMT00069620	4.52554	4.3212	3.75826	3.95326	4.05441	5.13401	5.19107	4.13873	5.63512	4.51507	3.99155	3.44713
MMT00031333	5.18117	4.67421	4.69988	4.16242	4.76102	4.95567	4.78302	5.58215	5.52586	5.11506	5.12887	4.99578
MMT00079156	7.1238	6.93013	6.91027	6.503	6.81312	6.70319	7.02503	7.17732	7.40541	7.15218	6.97191	7.06531
MMT00081002	4.21516	4.45877	4.34506	4.3272	4.26915	5.13401	4.12845	3.38519	3.84866	3.77153	4.2629	4.29081
MMT00047748	4.38013	4.38876	4.51769	4.38876	4.67891	3.59872	4.83975	4.6836	4.59931	4.86575	4.34506	3.6427
MMT00044361	8.59584	8.7753	8.45392	8.74599	8.79628	8.68311	8.87649	8.97319	8.99474	9.09482	8.88782	9.01085
MMT00015096	4.08307	3.10684	3.63787	3.68537	3.2962	4.35977	3.63787	2.66067	2.24488	2.99819	3.02058	3.69932
MMT00060215	6.39715	6.13849	5.33354	5.53237	5.34837	5.76902	7.27098	6.2222	5.74007	6.02399	5.69204	5.74232
MMT00024264	5.96603	5.8629	6.02768	6.25641	5.97848	5.76902	5.53237	5.86187	5.31403	5.89053	5.71282	5.96844
MMT00029598	9.64373	9.86191	9.02598	9.60716	9.77957	9.13942	9.8592	10.1394	10.3217	10.3131	10.1727	10.4028
MMT00019749	4.21516	3.32048	4.57934	4.3272	4.30305	2.43473	3.2962	3.47443	2.49994	3.71772	4.66476	4.52293
MMT00026172	4.45877	3.92979	3.75826	4.22483	4.01405	3.83187	4.12845	2.66067	3.69469	3.09282	4.10768	4.20541
MMT00033072	6.84536	6.97191	7.16439	7.06553	7.23092	6.89369	6.88913	6.5461	6.86458	7.02179	7.15725	7.27331
MMT00065736	5.66623	5.04578	5.4048	5.91663	4.73867	5.36013	5.81459	5.86187	5.87114	5.55044	5.0888	5.26797
MMT00065768	10.1236	10.2343	10.1326	10.0024	10.2805	10.1561	10.6858	10.8237	10.6033	10.6186	10.5202	10.4907
MMT00051022	6.32924	6.2406	6.47625	5.68739	5.85566	6.44485	6.78995	6.49503	7.14328	6.58981	6.3676	6.25877
MMT00013479	3.44713	4.24716	3.50652	3.32048	4.01405	4.28002	3.50652	2.85598	3.14131	3.16161	3.65706	3.57873
MMT00076599	6.33819	6.09343	6.12822	5.7646	5.93148	5.86187	6.1563	6.29673	7.04519	6.52732	6.38209	5.97991
MMT00069165	5.42732	5.41611	5.21716	5.4048	5.20255	5.46592	5.63512	5.96363	5.74007	5.51801	5.54787	5.6792
MMT00060813	8.14376	8.07476	8.43598	8.09842	7.94928	8.27044	8.86834	8.42325	8.39968	8.34499	8.52213	8.30772
MMT00077777	4.12845	4.3212	3.97827	4.01405	4.53075	4.02886	3.69932	4.11811	3.2962	3.46357	4.16577	3.69932
MMT00081993	6.34634	5.94326	6.30055	5.30341	6.09034	5.74232	6.36724	6.35076	6.97788	6.503	6.43654	6.2975
MMT00026998	9.73716	10.0717	9.68561	10.1443	9.92752	9.8502	9.14686	9.87112	9.10588	9.45779	9.57536	9.8205
MMT00030373	6.67346	6.0286	5.34985	6.00914	6.51685	6.2222	6.74414	6.61456	7.66334	6.8288	6.95408	6.67582
MMT00059926	4.94984	4.75658	4.26915	4.57682	4.64808	4.93223	3.7627	4.20867	4.47238	3.92979	4.39734	4.11811
MMT00065883	8.28198	8.04012	8.07921	7.89678	8.45374	8.5276	7.77252	7.85038	8.11043	7.83467	8.03429	8.09842
MMT00067082	3.98398	3.98398	2.85598	3.57873	3.87348	3.06436	2.96777	2.99819	3.14131	2.27002	3.49056	3.44713
MMT00013974	4.21516	4.07596	4.30305	3.92584	4.76102	4.56671	4.59931	4.6836	5.0888	5.00517	4.20215	4.4478
MMT00077323	8.72334	8.66914	8.67783	8.66374	8.61222	8.62643	8.40793	8.17113	8.29381	8.51418	8.45477	8.71935
MMT00036723	4.8154	5.17785	5.1323	4.65764	5.15947	4.95567	5.51407	5.31554	5.46592	5.13487	5.22683	4.96339
MMT00012709	3.14131	3.46357	2.64153	3.16161	2.92883	2.27002	3.44713	3.47443	3.90993	3.26528	2.65113	2.75274
MMT00018482	7.70326	7.79245	7.97603	8.02727	7.80595	7.79408	8.49415	8.27103	7.9449	8.1363	7.99146	7.87824
MMT00060597	9.37782	9.12544	9.1977	9.0243	9.09312	9.28302	9.35285	9.66417	9.57244	9.26813	9.38017	9.17381
MMT00000131	5.36743	5.60085	5.63875	5.47946	5.30949	5.21555	5.60085	6.04144	5.88036	5.7909	5.6792	5.8515
MMT00020772	7.78947	7.69298	7.78143	7.68555	7.78102	7.45832	7.35563	7.42915	7.46054	7.39438	7.5902	7.51447
MMT00024017	7.0878	6.87742	7.10143	7.10143	6.83144	7.19794	7.2506	7.23092	7.15345	7.40789	6.8537	7.04292
MMT00050965	5.4982	5.553	5.84941	5.17785	5.23643	5.26953	5.85358	6.2406	6.06498	5.60827	5.61196	5.50218
MMT00048155	7.94782	8.46536	9.92504	8.11282	8.08431	7.80057	8.1005	7.32221	7.50606	7.0878	8.58586	7.51085
MMT00025649	5.51012	4.99955	5.33354	4.89837	5.15947	5.23323	5.81459	6.53803	5.59216	4.98538	5.56066	4.58686
MMT00053034	9.9285	9.98897	9.41012	9.78325	9.71519	9.74985	10.2945	10.4807	10.5567	10.5885	10.6714	10.4094
MMT00036955	5.20418	5.71511	5.0888	5.21878	4.85955	5.41611	5.67685	5.62785	6.00071	5.49953	5.61196	5.61564
MMT00016676	4.92037	4.52554	4.69988	3.92584	4.58936	4.49388	5.00142	4.63362	4.82604	5.04941	4.37724	3.81489
MMT00005957	9.62241	9.27639	9.06522	8.95362	9.38062	9.60723	9.70414	10.0935	9.98149	9.9618	10.2025	9.99263
MMT00025067	5.4632	5.51012	4.95567	4.54112	5.12543	5.21555	5.76902	5.21231	5.76128	5.46864	5.17785	5.35132
MMT00046606	4.30305	4.16577	3.97827	4.3272	3.76712	4.11811	2.75274	3.63787	4.10069	2.99819	3.56356	3.57873
MMT00056571	7.25336	7.58175	7.42723	7.11927	7.00036	8.11336	8.11043	8.11108	7.99217	8.05342	7.99146	7.5877
MMT00038375	5.52716	5.49687	5.43568	5.30341	5.15947	5.71854	5.76902	5.97418	5.68739	5.46864	5.12887	5.39054
MMT00012541	8.79756	8.20411	9.11144	8.45837	8.31925	8.49598	9.34658	8.80719	8.92212	8.67055	8.68792	8.64547
MMT00068584	7.08249	7.17856	6.96951	6.87997	7.05743	7.30331	7.14434	7.23092	7.68058	7.43211	7.27584	7.21118
MMT00068509	4.48585	4.45877	4.63846	4.38876	4.76102	4.95567	5.09761	4.63362	5.17119	4.98538	4.34506	4.6239
MMT00005653	5.71854	5.32457	5.63875	4.94595	5.54787	5.29118	6.1563	6.04144	6.03228	5.36378	5.4048	5.54401
MMT00072526	8.92454	9.14027	8.11802	8.72206	8.11813	8.54219	7.94855	8.07743	7.93682	7.92475	7.94246	8.16045
MMT00016365	9.02315	9.04539	8.66471	8.74984	9.01701	8.75485	8.19921	8.65765	8.65922	8.40899	8.47721	8.88051
MMT00060459	3.14131	2.91296	3.69932	3.16161	4.10768	3.59872	4.59931	5.70938	3.44161	3.92979	3.65706	2.27002
MMT00054808	7.62198	7.55099	7.73577	7.16355	7.51431	7.72757	7.99382	7.87364	7.95341	7.80997	7.73802	7.80783
MMT00006988	5.27885	5.12887	4.95567	4.84708	4.47238	5.29118	5.78655	5.51012	5.63512	4.98538	5.00517	5.33205
MMT00040864	4.7091	4.52554	4.30305	4.26915	4.01405	4.15906	3.50652	3.92979	2.96007	4.25033	4.31518	3.92584
MMT00065750	5.68505	5.74007	5.95299	5.92951	5.54787	6.06138	6.08902	5.92061	6.24298	6.24219	5.98466	5.90464
MMT00029323	3.20788	3.55846	3.14131	3.57873	3.58375	3.59872	2.19325	2.85598	2.96007	1.95058	2.16001	2.75274
MMT00047171	6.17056	6.16638	5.92853	5.7646	6.06498	6.23183	6.13251	6.66579	6.38569	6.15377	6.09518	6.10395
MMT00037375	8.98901	9.05842	8.87828	8.84324	8.84585	9.0484	9.26246	9.3433	9.2328	9.2315	9.13793	9.00659
MMT00011577	6.81739	6.57476	6.37051	5.7646	5.81566	6.0899	6.83645	7.07938	7.08868	6.73203	6.68344	6.49102
MMT00016680	9.88072	10.0169	9.96541	9.89531	10.0617	10.0577	10.2529	10.3128	10.1449	10.2121	10.2051	10.1948
MMT00040374	3.98398	3.77592	2.85598	3.57873	3.92188	3.78903	4.86781	4.18903	4.10069	4.37434	3.99155	3.69932
MMT00000608	9.01991	7.02549	8.87405	8.1873	7.71418	8.66241	9.16268	8.76691	9.46418	9.10124	8.3346	8.23856
MMT00049364	5.71854	5.83895	5.55939	5.36159	5.46592	5.0033	4.66476	5.42032	5.17119	4.96147	5.61196	5.20418
MMT00015131	5.81459	5.90464	6.19661	6.06318	6.3419	6.25955	6.33893	6.59106	6.33596	6.503	6.42119	6.24378
MMT00014906	4.02886	3.77592	4.22162	4.74092	3.8234	4.52554	4.4615	5.15778	4.72055	4.3272	3.83187	4.52293
MMT00039970	6.20763	6.59231	6.25955	6.147	5.96555	6.29902	6.32024	6.8952	6.91675	6.88456	6.77273	6.66697
MMT00047935	4.61902	4.38876	4.26915	3.68537	4.33913	4.69293	2.85598	3.14131	4.01033	3.16161	3.56356	3.57873
MMT00029545	11.2119	11.6451	12.0347	11.6904	11.2917	11.5624	11.1427	11.3513	11.0678	11.4114	11.9862	11.708
MMT00001342	9.31833	9.56584	8.99191	9.10719	9.37854	9.1934	8.97439	9.21612	9.07121	8.90184	9.26793	9.32402
MMT00033612	3.77153	3.46357	3.87348	4.22483	3.2962	3.59872	4.02886	5.81031	4.33616	6.96663	3.92188	4.20541
MMT00031423	3.2962	4.12156	4.05441	3.26528	3.58375	4.11811	4.59931	4.3421	3.80632	4.12156	3.44161	3.81489
MMT00031882	4.7091	4.07596	4.30305	4.45877	4.40588	4.4615	4.4615	4.04351	3.57873	3.59375	4.20215	4.4478
MMT00010449	3.65229	3.10684	2.64153	3.68537	3.44713	3.88573	3.8234	3.58375	5.17119	4.29081	3.70394	3.98017
MMT00005231	6.44416	6.34264	6.18468	6.27671	5.71854	6.23183	7.01321	6.18963	6.70319	6.26816	5.87371	5.61564
MMT00080573	8.71364	8.53102	8.83674	8.4003	8.57061	8.53459	8.9036	9.28055	8.96756	8.9851	8.94212	9.03494
MMT00005428	6.59168	7.06553	7.06553	6.41909	6.67287	7.03606	5.46592	6.36104	5.91962	5.7646	6.00633	6.19127
MMT00018141	6.77191	6.29367	6.64491	6.25641	6.6078	6.63557	6.84902	6.74077	7.13047	6.74973	6.81151	6.50035
MMT00061075	7.50524	7.9943	7.75412	7.65754	7.77225	7.56915	7.99382	8.09886	8.01234	7.95244	7.88944	7.74589
MMT00000368	9.21004	9.01945	8.68237	8.81308	9.28745	9.19791	9.28384	9.40804	9.70317	9.35225	9.51847	9.12064
MMT00080083	5.94521	4.91041	6.92963	5.58215	5.81566	5.21555	4.3	4.28466	4.13531	5.11506	5.69204	4.52293
MMT00064107	6.22702	6.55954	6.06498	6.06318	5.82841	6.2222	7.10318	6.59106	6.65509	6.92147	7.10798	6.76805
MMT00003243	8.24511	8.34868	7.41425	7.95268	7.8685	8.04548	7.54134	7.66289	7.63232	7.37169	7.80742	7.77005
MMT00071365	3.2962	4.07596	3.81489	4.04716	3.92188	4.02886	4.42838	4.94984	4.72055	4.4478	4.12845	4.55397
MMT00010362	7.70786	7.64649	7.64948	7.68058	7.85481	6.98098	7.2403	7.28954	6.94581	7.38901	7.56788	7.73238
MMT00025305	4.21516	4.28466	4.22162	4.3	4.13531	4.38876	3.69932	3.77153	3.80632	3.92979	3.83187	4.37434
MMT00077072	4.26915	3.88166	2.85598	3.68537	4.10768	4.02886	4.07952	4.40019	3.84866	4.70219	3.32048	3.69932
MMT00043642	5.9894	5.8629	5.87422	5.83264	5.42032	6.29902	5.21231	5.21231	5.60827	5.43568	5.63754	5.61564
MMT00045272	3.92584	4.52554	3.75826	3.68537	4.13531	3.59872	4.78302	5.11852	4.96339	4.81327	5.19272	4.99578
MMT00036749	7.55067	7.39456	7.50457	7.62106	7.5189	7.34384	7.1769	7.1184	7.16019	7.37169	7.81398	7.33474
MMT00079222	6.44416	5.74007	6.02768	6.35223	6.46131	5.70938	7.50242	6.89823	7.10318	7.13004	7.07715	7.56312
MMT00011028	3.58124	4.3212	4.30305	4.04716	4.37724	4.28002	4.4615	5.15778	4.01033	4.7588	3.59375	3.92584
MMT00077375	9.33955	8.93132	9.45565	8.75763	9.04937	9.18846	9.67902	9.46546	9.66772	9.48882	9.30817	9.23893
MMT00080633	6.84536	6.43793	6.69972	6.54159	6.59293	6.85344	6.95408	6.82695	7.22209	7.06822	6.95408	7.01484
MMT00037447	7.28338	6.93013	7.32559	6.83012	7.39955	6.98098	7.79841	7.60355	7.77678	7.56121	7.39705	7.40559
MMT00029329	6.89166	6.57476	6.64491	6.1855	6.07482	6.60718	6.7357	6.77356	7.16019	6.64911	6.51685	6.06946
MMT00019490	5.76128	5.81566	6.02768	5.83264	5.57587	5.46592	6.01937	6.2222	6.06498	6.45858	6.00633	6.25877
MMT00000968	3.44713	3.77592	4.22162	4.12845	4.26915	4.02886	4.34506	4.7091	4.22162	4.7588	3.32048	4.29081
MMT00073624	6.24298	6.35811	6.5659	6.77301	6.8417	6.06138	6.08902	6.15546	5.6745	6.07749	5.96411	6.46131
MMT00015288	3.8234	3.55846	4.30305	4.04716	3.92188	4.38876	4.57682	4.6836	4.53853	4.20541	4.47238	4.29081
MMT00079572	6.67346	6.55954	6.6916	6.84222	7.05743	6.72835	6.62556	6.503	6.34264	6.48029	6.83065	7.00036
MMT00033707	3.70394	3.77592	4.05441	3.72683	3.70394	3.36199	4.69988	4.20867	4.18903	3.71772	3.83187	4.06881
MMT00043771	8.00065	7.35343	7.83651	7.2399	7.59984	7.44631	8.08962	8.08962	7.88754	7.52332	7.75329	7.31014
MMT00013893	7.67397	6.01844	8.04229	6.62708	7.0511	6.98098	5.94326	5.78655	5.87114	6.66756	6.94581	6.44139
MMT00072852	6.41311	6.29367	6.83171	6.20926	6.27671	5.99883	5.64717	5.76128	5.98086	5.97896	6.25563	6.10395
MMT00081499	9.00384	8.7327	8.65743	8.88884	8.73326	8.90573	9.06516	9.14771	8.99143	9.03786	8.95465	8.78814
MMT00073226	4.12845	4.24716	3.20788	3.95326	3.58375	4.11811	4.12845	3.85283	4.51243	4.70219	2.65113	3.14131
MMT00064623	4.21516	4.07596	3.57873	3.63304	2.69821	3.14131	3.57873	4.63362	4.33616	4.12156	3.99155	3.14131
MMT00077956	12.8139	12.7083	13.0339	12.7986	12.4588	12.9846	13.273	12.9742	12.9364	13.0518	12.9982	12.6079
MMT00070149	3.44713	2.91296	2.85598	3.10684	3.14131	3.59872	4.21516	5.46592	3.80632	3.59375	4.31518	3.44713
MMT00000777	11.5841	11.5046	11.3579	11.2805	11.171	11.531	11.6076	11.802	12.0626	11.8498	12.0034	11.773
MMT00031183	8.37155	8.21468	7.81345	7.70657	7.51052	8.01953	8.52695	8.6815	8.73326	8.54259	8.4852	8.35586
MMT00017992	4.12845	4.58686	4.37724	4.04716	4.47238	4.02886	3.8234	3.69469	3.90993	4.37434	4.64568	4.55397
MMT00053446	6.5322	6.23423	7.36878	6.68373	6.20926	6.98098	7.13732	6.59976	8.04023	6.81579	6.503	5.95493
MMT00019358	4.30305	3.55846	4.5437	4.22483	4.40588	3.92979	4.38876	5.52716	5.4808	5.36378	5.32607	4.99578
MMT00079824	4.61902	4.72283	4.05441	4.57682	4.53075	4.56671	4.17246	4.01405	4.01033	3.67129	5.00517	4.37434
MMT00029165	3.51706	4.16577	4.37724	4.48585	4.67891	4.02886	4.3	4.9939	4.72055	4.70219	4.52554	4.25033
MMT00008854	12.9785	12.9137	13.2822	12.7209	12.7859	13.1912	13.3178	13.2117	13.3731	13.0936	13.046	12.9765
MMT00006677	5.42732	5.16283	5.57587	5.4982	5.63512	5.30797	5.16952	4.73416	5.20906	5.36378	5.49553	5.35132
MMT00017740	5.44123	5.53885	5.1323	4.79606	5.08704	5.58341	5.78655	5.31554	5.55044	5.5934	4.80469	4.99578
MMT00001955	4.12845	4.02886	3.36783	3.87758	3.36783	3.47443	4.38876	4.28466	4.13531	4.02886	3.56356	3.75826
MMT00009954	4.7091	4.75658	4.6092	5.1323	5.15947	4.11811	3.44713	4.43117	4.59931	4.25033	4.39734	4.91041
MMT00060429	4.21516	4.78302	3.92584	3.95326	4.01405	3.88573	4.59931	4.78302	4.66239	4.9144	4.51243	4.20541
MMT00025169	4.96724	4.83449	4.77645	4.6906	4.88419	4.83238	5.53237	5.62785	5.17119	5.09057	5.03206	5.39054
MMT00048637	5.58215	5.95493	5.29731	5.36159	5.82841	5.78219	5.83948	6.20519	6.24298	6.35847	5.92061	6.03045
MMT00051228	8.15139	7.81559	8.02831	7.84869	7.80057	8.20187	7.69965	7.55035	7.65008	7.77307	7.98199	8.10181
MMT00070418	7.16313	7.21988	6.81312	6.74526	6.76031	7.13732	7.0878	7.35416	7.55227	7.27487	7.16355	6.97573
MMT00041887	7.1197	6.1118	7.02526	6.87075	6.46131	6.70319	7.40647	6.76695	7.20854	7.00294	6.56018	6.51882
MMT00005482	6.45927	6.13165	5.31554	5.42453	6.17139	5.69321	7.03606	7.28029	7.15725	7.01484	7.59425	7.07537
MMT00054422	9.34464	8.91448	9.25097	8.43563	9.16226	9.09537	9.49825	9.3931	9.65462	9.28302	9.33881	9.35432
MMT00062933	4.79172	4.72283	5.1323	5.08438	4.53075	4.11811	5.04941	5.00517	5.91962	5.07639	4.77645	4.52293
MMT00020142	4.21516	3.32048	4.19561	3.57873	3.8234	3.83187	4.91838	4.28466	4.18903	4.3272	4.2629	4.4478
MMT00027778	1.7864	3.41368	3.36783	2.63187	3.44713	2.66067	3.8234	4.01405	2.49994	3.98398	0.036544	1.45935
MMT00006881	6.54159	6.51291	6.27826	6.44967	6.89419	6.33372	6.05144	6.27826	6.46336	6.24219	6.78505	6.48231
MMT00078815	8.0267	8.12191	9.0526	8.33683	7.80595	7.75064	7.33307	7.55035	7.35453	7.66067	7.64978	7.62609
MMT00008186	8.94919	8.8586	8.66848	8.96106	8.83194	8.84911	8.4479	8.74368	8.58273	8.57029	8.91311	8.8915
MMT00046052	5.33354	5.66623	5.50549	5.77781	5.90464	5.75907	6.26816	6.00446	6.21897	5.91265	5.88036	5.86806
MMT00047462	4.64568	4.38876	4.05441	3.87758	4.53075	3.59872	4.52815	4.73416	4.59931	4.9144	4.66476	4.25033
MMT00027378	7.97865	7.97065	7.36878	7.64093	7.99971	7.64017	8.00112	8.42971	8.51188	8.61567	8.59312	8.42185
MMT00042546	4.3421	4.24716	4.19561	4.01405	4.10768	4.02886	3.69932	3.69469	4.18903	3.59375	4.47238	4.40304
MMT00018068	2.71203	3.67129	4.30305	3.45811	4.01405	3.59872	4.02886	5.45363	3.84866	4.25033	3.92188	2.66067
MMT00016989	9.03821	8.64457	8.98741	8.74599	8.63749	9.04311	9.4456	9.12689	9.06247	8.67055	8.53167	8.48604
MMT00059077	6.00633	5.553	6.31081	5.56828	6.07482	5.60085	6.84902	6.4071	6.07571	6.03595	5.7042	5.63512
MMT00024553	4.52554	4.78302	5.04759	5.17785	5.13743	4.28002	4.51243	4.31215	4.69757	3.77153	4.42838	4.80469
MMT00001160	4.12845	4.24716	3.87348	4.26915	3.961	4.28002	4.78302	4.20867	4.63846	4.53853	4.06522	4.11811
MMT00016783	10.6917	10.196	10.7144	10.4039	10.2125	10.0727	9.98482	10.2014	10.0221	10.3291	10.4297	10.4854
MMT00051253	10.3664	9.89852	10.1526	10.1495	10.4134	10.253	9.75553	9.98518	10.0831	10.0061	10.1593	10.1124
MMT00046600	9.72194	9.33871	9.0112	10.0798	9.73272	9.37619	9.22297	8.17113	9.02165	9.16556	9.3948	8.70603
MMT00022777	6.32924	6.27671	6.07749	5.98276	5.23643	6.41557	6.47287	6.49503	7.06329	6.48029	6.57476	6.12391
MMT00012502	8.71564	8.69643	8.65743	8.65176	8.55343	8.7315	8.81795	9.06163	8.8448	9.03534	8.88681	8.96021
MMT00031281	9.65656	9.38413	9.47559	9.47051	9.43825	9.41043	9.55721	9.77415	10.4872	9.86874	9.94195	9.7082
MMT00004123	5.222	5.37179	5.55939	5.10287	4.85955	5.39626	5.91862	5.54014	5.74007	5.6792	5.78873	5.48215
MMT00068712	5.78655	5.63754	5.81886	5.1323	5.53237	5.73387	6.5403	6.06946	6.22622	5.97896	5.78873	5.61564
MMT00010412	6.46336	6.39715	5.63875	5.6686	6.60162	6.17971	6.55954	6.41698	7.05472	6.48701	6.52504	6.20274
MMT00056703	10.4716	10.3295	9.87157	9.92687	9.93871	9.65998	10.2027	10.3459	10.4953	10.4057	10.2177	9.86262
MMT00064871	5.56702	5.49687	5.29731	5.20255	5.15947	5.69321	6.01937	5.28349	5.9588	5.97896	5.19272	5.54401
MMT00007847	4.67891	4.35977	5.0033	4.16242	4.33913	3.92979	5.03114	4.96532	5.89659	4.67421	5.03206	4.55397
MMT00006013	4.96724	4.52554	5.25701	4.76544	5.39911	5.09057	4.42838	4.52293	4.66239	4.25033	4.59683	5.15947
MMT00029984	10.8819	10.9633	10.6739	10.9004	10.9608	10.5142	9.90703	10.5614	10.3665	10.6312	10.9714	10.8194
MMT00026736	4.30305	4.12156	4.57934	4.84708	4.26915	4.38876	3.44713	4.18903	4.13531	4.20541	5.06745	4.47778
MMT00006432	8.02127	8.34592	8.27579	8.53264	7.98103	8.59195	8.9581	8.78276	9.22839	9.02338	8.95308	9.02003
MMT00049992	4.21516	3.77592	4.13873	4.3272	4.19232	3.72228	4.81327	4.80469	4.47238	4.29081	3.59375	4.58686
MMT00021150	13.3804	13.1307	13.1713	13.7626	13.809	13.0889	13.1771	12.739	12.8833	13.1485	13.1867	13.183
MMT00055414	4.86781	5.12887	4.69988	4.99201	4.76102	5.17119	4.69988	4.57934	4.72055	4.4478	4.6239	5.0888
MMT00006067	8.31501	7.88335	7.82728	7.86412	8.13159	8.04786	6.90977	7.95716	7.60726	7.85688	8.08431	8.1348
MMT00072686	7.53228	7.47125	7.17815	7.25729	7.25651	7.39973	7.75008	7.86322	8.11759	7.57641	7.70239	7.48088
MMT00033710	4.30305	4.80684	4.75658	4.6906	4.64808	4.88419	2.96777	3.58375	4.3	4.8387	4.66476	4.29081
MMT00044934	3.8234	4.16577	4.75658	4.04716	4.10768	4.38876	3.44713	3.85283	3.80632	2.58254	4.06522	4.52293
MMT00038241	2.71203	2.99819	3.75826	2.63187	3.51706	2.55212	3.14131	3.98017	4.01033	4.12156	3.32048	3.6427
MMT00073568	5.16785	5.82417	5.70651	5.46183	4.95179	5.46592	5.99507	6.13336	5.60827	5.6792	5.39126	5.24596
MMT00049565	2.95232	2.18004	3.20788	3.57873	3.8234	3.83187	2.96777	4.52293	3.74935	4.20541	1.7864	3.04991
MMT00030138	4.02886	4.07596	3.87348	4.45877	4.10768	3.44161	3.50652	3.20788	3.69469	3.59375	3.99155	4.16242
MMT00008072	13.8422	13.553	13.5307	14.1471	14.2586	13.5782	13.6208	13.3181	13.3255	13.6169	13.6481	13.8403
MMT00020817	4.38013	4.69988	4.57934	4.04716	4.33913	4.56671	4.02886	3.38519	4.37724	4.12156	4.31518	4.25033
MMT00038153	12.2308	10.9443	11.7837	11.0401	12.009	11.8715	11.2469	11.1152	10.5402	11.672	11.7104	11.859
MMT00045480	8.07654	8.03726	8.5236	8.48193	8.67033	8.87386	7.84255	8.096	8.1076	8.35879	8.31189	8.41992
MMT00069832	9.86172	9.94674	9.71244	9.84737	9.84958	9.31843	10.1496	10.2186	10.1493	9.91922	10.2068	9.9195
MMT00015631	6.57539	5.94326	6.44209	5.5498	5.23643	7.54134	8.35218	5.84837	8.76221	7.20162	6.69625	5.92061
MMT00022494	8.02127	7.80487	7.6969	8.08232	7.61984	8.10444	8.76663	8.77811	8.66966	8.54605	8.67408	8.57377
MMT00037781	8.32919	7.87287	8.05703	7.81905	7.90181	8.12923	8.50329	8.54299	8.50445	8.01327	8.44833	8.04217
MMT00080177	4.12845	2.80528	3.97827	3.87758	3.8234	3.98398	4.66476	3.92979	4.92037	5.46864	4.2629	4.25033
MMT00028683	6.54674	6.71525	6.63829	6.65896	5.86909	6.90301	7.47498	7.1386	6.96807	6.58981	6.69625	6.00446
MMT00004917	10.3452	9.41325	10.681	10.9861	9.62257	9.46529	11.0075	10.9424	10.9431	10.5199	10.1665	10.2495
MMT00061961	4.21516	4.07596	4.13873	3.10684	3.70394	3.83187	3.44713	2.19325	3.44161	2.58254	3.44161	3.81489
MMT00048340	10.0744	9.72315	9.99752	9.67267	9.63623	9.95054	10.2003	10.2502	10.3359	10.2999	10.3587	10.2102
MMT00018823	7.53228	7.31128	7.07001	6.95892	7.08271	7.40346	6.7357	6.67875	7.09309	6.92618	7.09771	6.82695
MMT00039799	3.36783	3.41368	3.75826	3.68537	3.70394	3.72228	3.92584	4.52293	4.13531	4.4478	3.32048	3.92584
MMT00080684	6.56018	6.34264	6.49102	6.4	6.47287	6.81632	7.09836	6.78614	6.97788	6.66756	6.3419	6.68402
MMT00067079	7.2882	6.72608	7.15725	7.08868	6.92098	7.39295	7.74196	7.64948	7.73605	7.64348	7.52512	7.51447
MMT00015930	3.44713	1.7864	3.63787	3.45811	3.87348	3.83187	4.12845	4.40019	3.69469	4.37434	3.02058	4.29081
MMT00001806	5.18117	4.61902	5.15272	4.38876	4.76102	4.85541	5.35279	5.24596	5.63512	4.64087	4.86781	4.74541
MMT00022586	5.66623	5.08704	5.43568	4.63846	5.17785	4.97873	5.31403	5.87422	5.84105	5.53496	5.46592	5.42872
MMT00026944	10.7337	9.89196	9.13477	10.2526	10.8252	9.1578	11.9862	11.5743	12.6046	12.0623	11.799	11.3393
MMT00033347	9.84384	9.53262	9.6092	9.79203	9.90041	9.87346	9.49825	9.4313	9.5853	9.51021	9.74989	9.83129
MMT00036455	3.58124	3.67129	3.75826	4.01405	4.26915	4.02886	3.2962	3.44161	3.2962	3.71772	3.65706	4.16242
MMT00016669	5.47811	5.13743	5.76681	4.26915	5.23643	5.36013	5.83948	5.45363	5.78655	5.6792	5.46592	5.0888
MMT00002249	5.29884	4.58686	3.75826	4.16242	4.7068	4.02886	6.1563	5.19107	4.96339	4.53853	5.04759	4.37434
MMT00058330	4.30305	4.48853	3.87348	4.3627	4.40588	4.02886	4.7251	5.09409	4.33616	4.3272	4.34506	4.06881
MMT00059847	5.09761	5.01264	4.91041	4.99201	4.47238	4.75435	5.42872	5.73669	5.43568	5.62541	5.50284	5.46592
MMT00015950	4.55397	4.42838	4.30305	4.3272	4.53075	3.72228	3.69932	3.81489	4.13531	4.02886	4.84708	4.65287
MMT00019014	5.36743	4.75658	3.97827	4.60179	4.76102	5.15441	5.49953	5.24596	5.50946	4.86575	4.80469	5.04578
MMT00035020	6.95964	6.66638	6.79996	6.48029	6.7357	7.23032	7.56756	7.60355	7.75412	7.52609	7.76591	7.59238
MMT00049504	4.76102	4.86162	4.48317	4.38876	4.76102	4.58936	5.04941	5.03298	4.92037	5.04941	4.88622	4.76544
MMT00074183	6.76031	6.601	6.67051	6.51291	6.39358	6.74077	6.86458	6.8687	7.03652	6.70549	6.69625	6.65628
MMT00073625	5.63875	5.30797	5.17119	4.63846	4.81327	5.65076	5.83948	6.42679	6.35921	6.00259	6.2883	6.46131
MMT00036071	3.58124	3.26528	3.50652	4.01405	4.26915	3.92979	4.3	4.37724	4.47238	4.7319	3.92188	4.02517
MMT00045159	8.64314	8.66574	8.10804	8.53766	8.54444	8.0852	7.91507	8.47907	7.71732	7.86154	8.37888	7.88105
MMT00074216	3.92584	4.20541	4.19561	3.95326	4.33913	4.07596	4.52815	4.07952	4.77645	4.70219	3.65706	3.81489
MMT00068444	5.71854	6.04736	6.07749	5.9559	6.00071	5.76902	6.21897	6.59976	5.93738	6.4	6.25563	6.14445
MMT00008639	4.02886	4.07596	3.75826	3.63304	3.87348	4.11811	-0.7005	3.07152	3.20788	3.83187	3.83187	2.55212
MMT00004176	5.53885	5.09761	5.83474	4.89837	4.85955	5.30797	5.89255	5.61319	5.66505	5.62541	5.35866	5.42872
MMT00044885	4.21516	3.67129	3.20788	3.39094	3.92188	4.15906	4.38876	4.20867	4.2629	4.12156	3.65706	4.16242
MMT00028197	3.2962	3.46357	3.50652	4.20215	3.2962	3.20788	3.44713	4.4615	4.33616	4.57682	4.28774	3.81489
MMT00006698	3.2962	3.26528	3.2962	2.70744	3.36783	2.43473	3.2962	4.01405	4.18903	3.32048	3.83187	2.27002
MMT00029202	8.72334	8.71757	8.97755	8.79289	8.77941	8.87828	8.74522	8.54299	8.1076	8.2173	8.47257	8.48361
MMT00071233	6.17056	4.64087	5.34985	4.84708	4.99578	5.07282	5.78655	6.41698	5.93738	5.36378	4.84708	4.96339
MMT00017138	4.21516	3.71772	4.22162	4.89837	4.53075	4.38876	4.17246	3.14131	3.90993	4.02886	4.31518	4.20541
MMT00059441	5.42732	5.37179	5.29731	5.00984	5.23643	5.25228	5.09761	4.7588	5.0888	4.98538	5.16115	5.46592
MMT00009424	5.13914	4.75658	5.36743	3.82764	5.04578	5.25228	5.04941	6.0899	5.9588	5.04941	5.12887	5.04578
MMT00010285	4.86781	4.86162	5.21716	4.65764	4.40588	5.04941	5.35279	5.33354	4.96339	5.13487	4.80469	4.74541
MMT00026279	6.22702	5.49687	5.81886	5.36159	4.99578	5.46592	4.89635	4.90038	5.31403	5.17452	5.45088	5.30797
MMT00040554	5.31554	5.61196	5.1323	5.03665	5.42032	5.52716	5.00142	4.4615	5.18943	4.86575	5.17785	5.36888
MMT00021948	12.1238	12.2605	12.3556	12.2534	12.1895	12.2292	12.3567	12.5298	12.4875	12.4276	12.3489	12.2791
MMT00078069	5.74232	5.53885	5.92853	5.73557	5.57587	5.86187	6.10919	5.97418	6.15799	5.87729	6.13977	5.52716
MMT00026217	5.18117	4.86162	5.0033	4.89837	4.64808	4.95567	4.38876	4.3421	4.72055	4.81327	4.96916	4.76544
MMT00054038	3.92584	4.78302	4.45055	4.20215	4.13531	4.35977	4.89635	4.73416	4.59931	4.51507	4.42838	4.3272
MMT00036166	4.45877	4.20541	3.75826	3.57873	4.01405	4.35977	2.48927	2.85598	4.4478	2.81386	3.56356	4.16242
MMT00037199	11.1442	11.218	11.1131	11.0835	11.2273	11.1756	10.7855	11.1821	11.0505	10.9779	11.2283	11.2579
MMT00038396	4.30305	3.98398	4.45055	4.3272	4.76102	4.75435	4.89635	4.87807	4.66239	5.11506	4.77645	4.74541
MMT00006323	4.52554	4.64087	4.26915	4.91838	4.10768	4.63241	5.39197	4.82392	5.50946	5.04941	5.09761	5.13572
MMT00034658	1.7864	3.67129	3.63787	2.37803	2.92883	2.86426	3.69932	4.13873	2.65113	3.92979	2.54183	3.14131
MMT00030465	4.38013	4.02886	4.13873	4.3627	3.2962	3.47443	3.36783	2.99819	3.69469	3.09282	3.75381	3.92584
MMT00033506	7.14795	7.12982	7.02526	7.07715	7.05743	7.11516	6.92815	6.64251	6.88125	6.72381	6.65628	7.02872
MMT00022784	6.93456	6.91027	7.28531	6.63345	6.89898	7.48441	7.63474	7.36112	7.25296	7.15725	6.95989	6.23582
MMT00003475	6.15039	6.29979	6.10395	5.87422	5.80387	6.2406	6.29979	6.28599	6.46336	6.27749	6.04508	5.66623
MMT00026973	4.12845	4.75658	4.22162	4.01405	2.92883	4.75435	5.31403	5.04941	5.24438	5.11506	4.2629	4.11811
MMT00020871	5.33354	5.49687	4.91041	4.6906	5.3848	5.92061	5.96555	6.14615	6.09606	6.01287	5.66623	5.78873
MMT00037600	5.62785	5.553	5.90264	5.5498	5.95493	5.58341	5.83948	6.41698	6.04326	5.95299	5.81459	5.61564
MMT00040538	3.92584	3.98398	4.13873	4.26915	4.01405	3.88573	4.52815	4.4615	4.33616	4.25033	3.83187	4.29081
MMT00081348	6.67992	6.25877	6.71296	6.23343	5.97848	6.71525	7.07493	6.65985	7.15725	6.70549	6.6711	6.51225
MMT00081727	8.32526	8.22033	8.0058	7.99099	7.71418	7.89804	8.12245	8.3461	8.52483	8.32582	7.75329	7.77005
MMT00018994	4.52554	4.3212	3.36783	4.38876	3.87348	4.35977	4.42838	5.81031	4.94595	4.29081	3.02058	3.81489
MMT00043936	6.58669	6.34264	6.61333	6.23343	6.25169	6.64911	6.96711	6.6916	6.83645	6.58981	6.13251	6.18054
MMT00021730	4.58686	3.88166	3.81489	4.04716	3.8234	4.63241	3.57873	2.92883	4.01033	3.71772	3.83187	4.52293
MMT00024227	4.08307	3.55846	3.69932	3.87758	4.01405	3.36199	3.14131	3.07152	3.44161	3.32048	3.44161	4.02517
MMT00018014	9.5121	9.32776	9.34889	9.48228	9.59197	9.45646	9.31215	9.17968	9.14866	9.22373	9.30618	9.42082
MMT00058269	3.8234	3.26528	3.63787	3.45811	2.81386	3.72228	3.44713	3.26528	1.13253	2.81386	4.02886	3.57873
MMT00031488	11.2301	11.344	11.1627	11.3122	11.3743	11.1038	10.9844	11.0189	11.0642	11.0704	11.3123	11.1569
MMT00063859	3.2962	3.71772	3.97827	4.3272	3.8234	3.83187	4.4615	4.31215	4.01033	4.51507	3.75381	4.29081
MMT00030380	3.36783	3.88166	4.13873	3.68537	3.2962	3.83187	3.57873	5.13572	4.2629	4.20541	2.65113	4.37434
MMT00028714	4.12845	3.88166	3.75826	4.04716	4.10768	3.59872	3.2962	3.26528	3.80632	3.59375	3.83187	3.92584
MMT00065097	4.12845	3.55846	4.05441	3.78903	3.65229	4.02886	2.48927	2.66067	3.2962	3.16161	3.99155	3.44713
MMT00009101	4.52554	4.83449	4.66476	3.95326	4.7068	4.63241	4.3	6.1118	4.77645	5.84628	4.6239	4.55397
MMT00046154	5.33354	5.08704	4.66476	4.79606	4.81327	4.80469	5.51407	5.21231	5.72651	5.30797	5.37324	5.41046
MMT00012399	2.95232	3.46357	3.50652	4.04716	3.92188	3.59872	4.17246	4.3421	3.74935	4.37434	3.49056	4.02517
MMT00032750	2.19325	3.10684	0.370493	2.70744	2.4458	3.14131	3.57873	3.85283	3.74935	3.59375	2.43473	2.96007
MMT00031340	7.75064	7.62792	7.38901	7.51134	7.35856	7.3764	8.56903	8.8586	9.1832	9.13526	9.01097	9.26432
MMT00056668	4.76102	4.02886	4.37724	3.39094	4.64808	4.56671	5.09761	5.24596	4.47238	4.4478	3.75381	4.20541
MMT00069732	3.8234	4.35977	3.50652	3.39094	3.14131	3.36199	4.78302	3.77153	4.57682	4.16577	3.83187	4.11811
MMT00049304	3.92584	3.83187	4.30305	3.68537	3.70394	4.35977	4.4615	4.18903	4.51243	4.20541	3.94937	4.02517
MMT00037740	6.93995	6.48701	6.92963	5.7909	6.5234	6.59168	7.14434	6.96085	7.07982	6.79807	6.45995	6.61149
MMT00078782	4.58686	5.20255	4.75658	5.03665	4.90239	5.09057	5.53237	5.21231	5.29425	5.46864	4.7091	5.29118
MMT00051052	4.76102	5.37179	5.04759	4.57682	4.78738	4.75435	4.3	4.01405	4.40588	4.64087	5.04759	4.4478
MMT00048579	8.81788	8.6757	8.45048	8.70488	8.5886	8.55263	8.95683	8.9312	8.73326	8.90861	8.67408	8.80316
MMT00032770	4.18242	3.88166	3.75826	3.10684	1.7864	3.83187	2.75274	3.07152	1.13253	3.26528	4.06522	3.2962
MMT00026943	4.61902	4.93026	4.57934	3.68537	4.19232	4.07596	4.89635	5.21231	5.39054	4.70219	4.06522	4.3272
MMT00014106	3.51706	3.88166	4.22162	4.01405	4.10768	4.38876	4.51243	4.31215	4.66239	4.57682	3.87758	3.44713
MMT00015455	3.36783	3.16161	3.14131	4.01405	3.8234	3.59872	4.02886	3.63787	4.63846	4.02886	2.65113	3.37364
MMT00036143	7.8864	7.76591	7.23392	7.20162	7.64153	7.43211	7.87184	7.83335	7.97579	7.74701	7.55691	7.75008
MMT00079355	3.70394	3.55846	3.36783	3.95326	3.44713	3.44161	4.52815	4.3421	3.94937	4.4478	3.32048	3.69932
MMT00000760	4.92037	4.72283	5.1323	5.34394	4.7068	4.91041	4.3	4.13873	4.40588	4.40304	4.47238	4.82604
MMT00071842	9.30566	9.29465	8.80491	8.91105	8.23187	9.24216	9.30817	9.51699	9.53092	9.15764	9.11556	8.96166
MMT00007073	4.96724	3.77592	3.69932	3.87758	4.37724	4.49388	5.66505	4.7588	4.51243	3.92979	3.83187	3.21438
MMT00007011	7.2882	6.93013	7.11016	7.28029	7.37893	7.21786	6.81312	7.02549	7.00036	7.19137	7.42128	7.35636
MMT00038361	10.7397	10.7784	10.7686	10.7722	10.8057	10.4983	10.4483	10.596	10.2483	10.5085	10.5754	10.489
MMT00035279	7.33195	7.49177	7.22872	7.30331	7.10275	7.42496	7.45302	7.90733	8.02139	7.79218	7.81985	7.53098
MMT00053906	4.02886	3.59375	3.97827	3.00569	4.01405	3.72228	2.96777	3.07152	2.96007	2.99819	3.32048	2.75274
MMT00061212	10.311	9.86288	9.84037	9.51506	9.97308	10.0586	10.4249	10.3177	10.5502	10.2722	10.3389	10.463
MMT00082175	7.76259	7.356	6.71296	7.16355	7.44562	6.5403	6.06363	6.46336	6.54738	6.4219	6.57034	6.17056
MMT00070310	9.35432	9.2074	9.14771	9.15163	8.93655	9.22508	9.60662	9.63389	9.58635	9.58455	9.64211	9.4248
MMT00046734	8.43598	8.53102	8.56268	8.40899	8.19235	8.78705	8.97253	8.86157	8.85016	8.61927	8.71992	8.58915
MMT00038451	3.92584	3.67129	4.75658	3.82764	4.7068	3.20788	3.44713	3.85283	2.49994	3.54308	4.52554	4.06881
MMT00020883	7.78375	7.91146	8.03084	7.21422	6.77301	7.53325	8.67644	8.12385	7.58676	7.33716	7.54794	7.28954
