# Supplementary material for: Co-expression network analysis identified hub genes critical to triglyceride and free fatty acid metabolism as key regulators of age-related vascular dysfunction in mice
Source: Aging (Albany NY). 2019 Sep 12;11(18):7620–38. doi: 10.18632/aging.102275 (PMC6781998; doi:10.18632/aging.102275)
Supplement: Supplementary Table 3 [file aging-11-102275-s011.xlsx]

## Sheet: Sheet1
Supplementary Table 3. 1036 significantly differentially expressed genes between 3 32-week and 3 78-week old wild-type mice(P ≤ 0.05) from a study by Gräbner et al., (2009)
Gene Symbol	GSM44658.CEL(wt-Aorta-32-weeks-1)	GSM44663.CEL(wt-Aorta-32-weeks-2)	GSM44659.CEL(wt-Aorta-32-weeks-3)	GSM250922.CEL(wt-Aorta-78-weeks-1)	GSM250923.CEL(wt-Aorta-78-weeks-2)	GSM250925.CEL(wt-Aorta-78-weeks-3)
Hmgb2	8.40292	9.86213	8.77087	8.81458	8.55424	8.49077
Cd5l	8.50308	9.06368	8.7562	8.20413	8.04946	8.0696
Smap1l	6.62614	6.87939	6.22137	5.71168	6.0804	6.29393
Eps8	10.5218	12.0046	10.4012	9.84416	9.85624	10.0881
Slco2b1	9.73592	10.49	10.0598	9.40348	9.41403	9.45722
Rarres1	8.99492	10.8485	9.42917	8.68595	8.54037	8.74354
Osmr	7.8777	9.74253	9.31495	8.78037	8.17533	8.35603
Ctss	5.92577	5.88824	5.88824	6.08264	7.2171	9.07223
Gpnmb	10.482	12.3136	10.8812	10.1585	10.2293	10.1458
Efemp1	10.6773	12.2336	11.3339	10.7542	10.8106	10.7385
Tmem176a	6.30483	6.33048	6.37636	5.84575	9.28148	12.0102
Col8a1	8.62907	12.5017	9.65959	9.27261	9.44262	9.22033
Abcb1a	10.4704	11.8844	10.3134	10.2069	10.1975	9.91348
Runx2	8.70526	10.9687	8.89092	8.14484	8.17925	8.21477
Tmem176a	10.5753	12.703	10.7554	10.3533	10.3221	10.2666
A230083H22	8.96033	9.52261	9.02026	8.68543	9.20426	8.91939
Cxcl10	10.311	13.6056	10.1	9.40195	9.50805	9.88097
Tmem71	9.62588	13.3899	9.40036	8.39055	8.77308	8.83799
Oas1g	8.17257	9.76784	8.31811	7.79845	7.85409	8.14371
Htatip2	7.80472	9.57923	7.9626	7.35025	7.30619	7.34385
Dock2	8.72972	10.4504	9.45612	8.93339	9.06615	8.74936
Vat1	8.62939	8.8455	8.84312	8.33456	8.34323	8.36323
Sdc3	8.07741	9.02662	7.85507	7.82425	8.01385	8.41082
Cybb	8.3692	11.5471	9.50374	8.67271	9.17747	8.92901
4930506M07	9.14459	10.4557	9.18259	8.72188	8.896	8.85849
Arhgdib	8.19843	11.0524	9.21629	8.66834	9.49932	8.55431
Ccnd1	11.0896	12.307	11.0302	10.7635	10.7882	10.7495
Rgs1	7.82445	9.83492	9.03944	7.62384	8.38066	10.1717
Clec4b1	11.2531	12.1502	11.2107	10.5663	10.7786	10.8893
4933439C20	7.5515	7.95897	7.48102	6.6205	6.6694	6.77265
Ifi205	8.33089	8.67737	8.29179	7.6544	7.77704	7.57331
Csf2ra	11.3464	12.658	11.7771	11.4722	11.6456	11.6647
C1qa	6.6126	6.76434	6.78916	6.14806	6.13884	6.53706
Slc15a3	8.86563	10.2823	9.0982	8.47459	8.59929	8.58901
Mpeg1	8.82995	11.4121	9.8639	9.05705	9.11135	9.33031
Pira6	10.3473	12.1701	10.5105	10.5483	10.0833	9.93514
Rapgef3	7.81601	10.505	8.52339	7.67702	8.28646	7.90027
Clec7a	9.90552	10.4541	10.2653	9.9748	10.0795	10.0269
Tnfrsf11b	9.22493	10.1608	9.20726	8.28585	8.30084	8.4385
Casp4	8.18678	10.7787	7.9909	7.46807	7.65972	7.52131
Cebpa	10.059	11.0848	10.4799	10.0532	10.1591	10.2878
Plscr1	9.2989	10.2779	9.49832	9.09819	9.23191	9.21429
Ifit1	7.86871	9.29321	8.05843	7.59682	8.04754	8.00889
Vcam1	7.48143	8.90724	8.22139	7.37851	7.94294	7.5619
Rnf128	5.9351	6.88947	6.13499	5.89915	7.67244	6.32002
Lilrb4	9.96186	11.9705	10.1756	9.46435	9.61857	9.53453
Lgals3	8.54477	9.71983	8.34817	7.567	7.44522	7.35816
Eya3	9.95724	12.469	10.9154	10.6233	11.1844	10.9785
Clca1	8.12577	10.2179	8.57966	8.04133	9.34033	8.22529
Laptm5	10.7574	13.0751	10.6897	10.4817	10.4898	10.5194
Olr1	10.4111	11.7486	10.5231	10.0876	10.2481	10.0832
Pscd4	8.24921	8.77428	8.67782	8.50009	8.28861	8.89995
Vcam1	7.36914	8.77915	8.11962	7.34802	7.07441	7.24151
Htra4	9.87623	10.6839	10.4653	9.94869	10.6733	10.309
Inmt	5.06988	10.5982	5.29389	4.84612	4.90573	5.05004
Slc27a2	8.77752	9.41778	7.98046	8.54952	7.70674	7.84007
C3ar1	10.1072	12.4714	10.1874	9.7196	9.40065	10.1156
Cd36	9.51283	10.9889	9.48924	9.48945	9.51515	9.42066
Atp6v0d2	7.45755	8.58766	7.91649	7.38712	7.43843	7.76565
Fabp5	8.47539	10.7865	9.54334	8.39302	8.57764	8.33604
Cxcl1	9.19465	10.5591	9.9045	9.23641	9.4718	9.40845
Evi2b	9.42063	9.80537	9.59744	8.70791	8.79844	8.83681
Fabp5	8.96174	10.2019	8.93766	8.54183	8.72588	8.56674
Cotl1	9.66425	11.3371	10.8452	10.6064	11.0261	10.8056
Lyzs	7.67178	8.63399	7.3942	6.83725	7.02365	7.02069
Lcn2	7.50898	8.03556	7.35391	6.87335	7.04073	7.12129
Ms4a7	8.38284	9.54543	8.34493	8.03084	8.29663	8.3187
Trem2	10.9726	12.7805	10.7932	10.641	10.5815	10.6319
Irak3	9.00343	9.7229	8.84804	7.85546	8.0538	8.22949
Gadd45a	8.88062	10.3313	9.02818	8.34227	8.52235	8.71792
D830007B15	8.78721	9.25325	8.76016	8.46718	8.64664	8.51099
Pltp	9.14492	10.7358	9.71147	9.61847	9.65159	9.78494
Csf2rb	11.9405	12.838	12.2817	11.7562	11.9098	11.9742
Aadacl1	9.02673	9.37832	8.91703	8.42002	8.47301	8.92971
Gpr64	9.2	10.0292	9.4879	8.95988	9.22919	9.16161
Ccl12	5.48789	7.32275	5.77526	6.92656	5.94216	5.94827
Tlr13	11.0949	12.5463	11.3218	10.7875	10.7548	10.7086
Col8a1	10.9646	12.6783	11.0577	10.3869	10.2604	10.2871
Blnk	8.57426	10.0948	8.47033	7.65998	7.70503	7.91542
Ttc9	8.47878	9.41142	8.67002	8.21353	8.28604	8.2503
Phb	9.64011	10.2898	9.47535	8.85008	9.07949	8.94939
Anxa8	7.66617	7.80202	7.78461	6.80635	7.49189	7.06602
Il2rg	6.0418	6.55434	5.82755	5.42653	5.64536	5.58764
Ptk2b	7.69445	9.49755	7.99311	7.82074	7.75687	7.57639
Cyfip2	9.45846	11.3238	9.93971	9.38742	9.76757	9.45331
Prkar1b	6.71325	7.84558	7.55515	7.35844	8.39994	7.84111
H2-Eb1	9.49639	11.0748	10.1276	9.45295	9.28694	9.49596
Nrp2	10.974	11.912	11.1944	10.5176	10.5383	10.5723
Pcdhb9	7.93035	8.88566	8.04821	7.63783	7.83699	7.50369
Plxdc1	9.32247	10.9602	8.93305	8.88372	8.85365	8.98743
Egr3	9.28794	10.7639	9.08378	8.26765	8.28408	8.26361
Syngr1	7.80489	9.57213	8.01596	7.94878	7.74102	8.09793
Syk	9.49719	10.9231	9.57034	8.91112	8.90908	8.94087
Emr1	8.56589	10.0663	8.56915	7.51646	7.59072	7.58303
D1Ertd471e	10.3422	10.7083	10.5068	10.3765	10.4178	10.2555
Ucp2	10.1843	11.2297	10.7495	10.2911	10.4426	10.3295
2610204M08	8.31348	9.77124	8.83848	8.49931	8.48373	8.58689
Psmb8	9.39834	10.34	9.50959	9.00058	9.09809	9.07204
Csf2rb	8.90948	10.9368	10.0645	10.3282	9.85401	10.0256
Cd72	8.59436	9.07069	8.11203	7.16436	7.22919	7.27522
Wdfy4	6.88844	9.68162	7.25028	7.40734	7.64638	7.0544
Cxcl16	7.08597	8.60954	7.09892	6.03806	6.70134	6.58655
C3	10.5565	12.2532	10.8738	10.0238	9.81188	10.0379
Cotl1	11.5402	12.7909	11.6214	11.1492	11.1222	11.0868
Rgs2	7.25028	9.26299	7.14332	6.91772	7.11806	7.01651
S100b	10.6553	11.8729	10.0985	9.92723	9.73498	10.0294
OTTMUSG00000000971	9.86013	11.0148	10.0851	9.72553	9.88474	9.87596
Aadacl1	10.4399	13.0237	11.6395	10.5665	10.6681	10.6849
Etv5	7.16882	7.98033	7.40522	7.13209	7.35958	7.31581
A130040M12	11.337	12.5251	11.5957	11.6374	11.6464	11.6079
Lyzs	10.6434	12.8453	11.5861	10.9825	11.0668	10.9894
Cd36	9.36484	11.2036	10.1829	9.12428	9.39122	9.56525
Pltp	10.8469	11.5607	10.3914	10.3167	10.3057	10.2739
Frzb	10.8556	11.5835	11.0416	10.8513	10.7109	10.8568
Plxnd1	8.80405	10.5939	9.21206	8.53274	8.49376	8.50356
Clca2	9.33145	10.3886	9.40676	8.93005	9.32659	8.99474
Cd68	7.35949	8.8508	7.86793	6.88253	7.02454	6.83232
Vcam1	5.46453	7.49808	5.5168	5.18128	5.26179	5.21705
Vcam1	7.85086	10.0369	8.12844	8.05929	8.32899	8.38158
Ifi204	6.72972	9.32621	6.53368	5.89881	5.64381	5.80469
Lcp1	8.69659	8.74661	8.68735	7.77729	7.88343	7.74505
Sdc3	8.83599	10.2971	9.36043	8.65703	9.09618	8.85314
Centa2	7.88237	9.22974	8.18353	7.20154	7.24246	7.52217
Xdh	10.7981	12.1291	11.0215	10.6068	10.7569	10.7285
Icam1	7.79948	9.07563	8.20616	8.06422	7.85858	7.76426
Cd74	5.95963	10.4711	6.16899	5.41297	5.89605	5.85978
Msr1	10.4921	12.8433	10.7969	10.3333	10.8005	10.568
Gpr65	8.70252	9.89677	8.9853	8.44427	8.50242	8.46521
Abcg1	7.16517	7.43022	7.34526	6.6552	6.75696	6.7323
Hcls1	11.8033	13.4586	11.8701	11.4166	11.3708	11.4942
Cln3	7.66269	8.14469	7.9168	7.64632	7.88999	9.22938
D1Ertd471e	8.07367	9.75941	8.52499	8.05771	8.60097	8.14794
Cybb	9.18059	10.1622	9.92007	9.38732	9.34144	9.45908
Arhgap30	8.87297	11.0657	8.91116	9.07485	8.85136	8.47267
Cd300d	7.22746	8.35106	7.14013	6.85055	6.69223	6.77211
Ddah1	5.968	7.34205	6.11701	5.35305	5.42	5.48005
Havcr2	7.81004	9.50652	8.11221	7.85693	8.08401	8.00938
Aif1	8.5751	10.4251	9.68744	9.58344	9.37045	9.35326
Cxcl12	7.15294	6.70836	6.79982	7.06839	7.25516	7.10133
Nfkbie	8.69087	10.456	9.99045	8.90581	10.0258	9.40576
Soat1	7.48519	10.1539	7.80233	7.13627	7.42847	7.3093
Cxcl16	8.60782	10.7721	8.77655	8.29498	8.45275	8.34126
Slco2a1	9.33394	10.1522	9.29825	8.8396	9.27811	9.29326
Bcl2a1a	7.81713	9.82336	9.52793	7.4569	7.86875	7.99503
Gpr137b-ps	7.11365	7.99702	7.44271	6.61599	6.86153	6.90033
Tlr2	7.37366	9.17595	7.82917	7.29242	7.21538	7.41608
Ahr	8.1306	9.98577	9.34982	8.82198	9.48315	9.10436
Ngfb	8.33463	8.79022	8.60505	7.63972	7.91836	7.84511
AI413582	5.1516	5.29822	5.22124	5.06395	5.34311	6.31037
Lair1	7.09858	9.05383	7.58621	6.70501	7.12264	6.77198
Cd163l1	6.42834	7.49715	6.93103	6.0798	6.25121	6.26173
Tmem176b	10.0849	11.3977	10.6574	10.5505	10.5094	10.3956
Runx1	10.5989	11.9872	12.1203	11.8814	11.6856	11.9747
Ccnd1	9.87839	11.2123	9.66237	9.26734	9.41508	9.40537
Pgd	8.52227	10.0861	8.63227	7.87564	8.09831	7.72627
Egr2	5.4842	6.69568	6.08379	5.14798	5.48675	5.53308
C3ar1	8.77576	10.5606	9.15904	8.67656	8.64086	8.58304
Plscr1	8.96153	9.68749	9.41444	8.49597	8.53824	8.46897
Rasgef1b	6.01042	9.87173	6.27243	5.53999	6.06468	5.83982
Itgb2	9.55179	10.3704	9.22614	8.85749	9.40401	9.02255
Cd53	7.39358	8.17756	8.11318	7.51828	8.38256	7.86812
Fcgr1	7.60429	9.2398	7.9041	7.27956	7.40421	7.33505
5430435G22	7.31127	7.6839	7.339	7.49801	7.53719	7.52948
Vat1	7.26577	7.91265	7.07088	6.09282	6.47848	6.1514
H2-T23	10.6955	12.716	11.5049	11.2909	11.2108	11.1962
C3ar1	9.81595	11.7143	11.0502	9.87481	9.91799	9.97516
4632428N05	8.06057	11.5843	8.54321	8.29292	8.47706	8.29083
Hvcn1	9.54403	11.9772	9.82193	9.04531	9.07519	9.05658
Tpte2	8.75808	8.86836	8.69708	8.26324	8.46218	8.39616
Htr2b	10.0752	11.1497	10.5036	10.5205	10.0631	10.1154
Lcp1	8.73815	10.0488	9.264	8.98296	9.49767	9.28705
Slc7a7	9.08355	10.3959	9.08355	8.45704	8.48204	8.91397
1700112C13	8.04703	11.8166	8.05389	7.91872	8.31063	7.78565
Ptpn6	8.70318	9.65218	8.87312	8.5742	8.56661	8.54813
Tyrobp	6.54085	7.53249	7.34893	6.53677	7.92514	7.00446
As3mt	7.11172	7.68766	6.98288	6.20091	6.16312	6.15971
Snx10	6.05147	6.96069	6.23286	5.68269	6.47061	6.16747
C1qc	6.86183	9.61911	8.50626	7.87682	8.30642	8.06342
Pla2g7	7.1614	7.95526	7.35918	6.6562	6.63665	6.43292
Hgf	8.36987	9.889	9.02209	7.81333	8.40842	8.10978
H2-Aa	7.06107	9.20945	7.68435	7.16106	6.33503	6.37032
C4b	8.71205	9.22165	9.05848	8.37213	8.64982	8.42125
4631426J05	8.83197	10.1886	9.91282	9.66249	9.01903	8.94803
Gpr137b	6.97482	8.69383	6.58365	6.24538	7.50266	7.26821
Frzb	8.50208	10.6495	8.39213	7.72879	8.03817	7.78864
Pira1	7.63237	8.20715	7.82005	7.27058	7.87541	7.45187
Hk3	7.88428	7.87668	8.08052	7.14732	7.71983	7.42678
Lair1	10.2605	10.5997	9.93133	9.74864	9.85172	9.82162
Bex1	10.2586	11.2724	10.4064	9.95198	10.4564	10.1029
E030031F02	9.99752	11.4103	10.2455	9.76405	9.71221	9.57395
Lipa	5.57687	8.77134	5.50955	4.82203	4.90992	4.77615
Ttyh2	9.3268	10.6272	9.49642	8.98365	9.1882	9.08716
Mmp12	7.85727	8.02192	8.05428	7.72601	8.43843	7.85474
Akr1c13	8.89598	11.4236	8.76543	8.3941	8.61371	8.49505
Clca2	8.73218	12.0121	8.8511	8.36772	8.30969	8.24227
H2-Aa	6.65768	6.85419	7.03668	6.28589	6.47504	6.7819
Tgfb1	8.65745	9.29321	9.00309	8.67306	8.80442	8.80362
C1qb	9.97452	10.7003	10.5128	10.1005	9.72014	10.0822
Ugt1a9	5.29822	6.96214	5.36194	4.82221	5.13768	5.02194
C1qb	10.1986	11.0174	10.2932	9.76581	9.89637	9.91611
Serpina3n	6.55676	8.54893	6.5016	6.47273	6.55911	6.34593
Sncg	9.08059	9.29564	9.55443	8.82834	9.29994	9.09054
Ucp2	7.45164	10.9215	7.11122	6.65074	6.69704	6.90379
Csf2rb2	7.90069	11.1253	7.68083	6.60166	6.80303	6.93629
Gpr137b-ps	5.84142	7.31953	5.9963	5.2531	5.23265	5.39554
Cx3cl1	7.11173	9.23582	7.45545	7.07612	7.14624	7.43244
Ear3	7.54147	8.2778	7.49276	7.0688	7.43133	6.85692
Tnfaip2	7.892	9.11617	7.93223	7.30321	7.60734	7.33034
Adam8	7.72289	8.9268	8.07431	7.38045	7.19145	7.28377
Gpr137b-ps	9.20844	12.1523	9.189	9.28857	9.78987	9.59016
Gpr137b-ps	6.78685	7.00559	6.24338	5.64415	6.20859	6.37656
Arhgap19	5.55541	6.0928	5.60408	5.01603	5.03045	5.06731
Itgax	7.88679	9.19593	8.62595	8.29277	8.39381	8.07365
Pde8a	6.29923	7.00477	7.02754	6.77579	5.99873	6.48779
Mt2	7.27909	9.57136	7.03521	6.90334	6.75635	6.75448
Slc11a1	5.34217	7.12819	5.85357	5.40175	5.08558	5.5436
Bcl2l11	6.5578	7.94042	7.33456	6.71803	6.45221	6.49886
Fcgr2b	6.70035	6.51981	6.63045	6.14063	6.2228	6.07735
Fcgr2b	9.0767	10.5235	9.34091	8.57448	9.14039	8.54521
Kcnn4	5.53629	7.44757	5.79808	5.16733	5.31693	5.30144
Fes	5.76326	8.03629	6.11479	5.44886	5.7269	5.57578
AI662270	8.42847	9.35084	8.85295	7.96086	7.80016	8.22499
Lair1	10.7113	12.005	11.0533	10.7213	10.7767	10.7317
Vat1	8.90378	10.1673	9.25561	8.73722	8.9482	8.84726
Slc6a6	9.2556	11.0659	9.32097	8.10958	7.79788	8.36396
5430435G22	7.47333	7.59927	7.51056	6.54855	6.58514	6.46203
Slfn8	8.67136	11.1355	8.80144	8.6483	8.42551	8.8118
Ccl8	9.61656	11.2604	9.25324	8.94909	9.17553	8.83851
Plxnc1	8.17257	9.53306	8.01136	7.75486	7.91406	7.81734
Gch1	8.2362	8.61096	7.95727	7.83943	7.92748	7.76367
Ptprc	8.40802	13.036	9.36675	8.81974	8.64387	8.68845
H2-Ab1	7.69968	8.01579	7.58749	6.61512	7.02468	6.5829
Alox5ap	7.63111	8.30399	7.73867	7.42838	7.58016	7.39718
Fyb	6.88108	10.4848	6.91939	6.40669	6.46478	6.39119
Ptpro	8.16732	8.94424	7.80693	7.68597	7.8457	7.74259
Clec4d	9.14236	10.2149	9.16399	8.40043	8.38026	8.46541
Rac2	9.10516	10.1695	9.34515	8.67176	8.86404	8.74769
Serpina3g	8.35486	8.92684	8.61016	7.84645	8.22607	7.90104
4732429D16	7.2391	10.8676	7.12686	7.12548	7.28032	6.9528
Atp8b4	8.27257	12.5361	8.80441	8.10323	8.34111	8.44952
Ly86	8.37833	10.6361	8.79881	8.34341	8.20027	8.24625
Cd48	7.92421	9.50975	9.27709	8.02239	8.21115	8.05293
Cmbl	7.49276	9.93426	7.62507	6.91298	7.03167	6.90888
Igfbp2	8.16483	8.62368	8.15199	7.41314	7.53977	7.30856
Abcc3	7.84567	8.92689	7.92632	7.57818	7.89027	7.76996
Trim25	8.66071	10.3639	9.08198	8.72743	8.96032	8.97865
Litaf	7.88359	8.6156	8.44705	7.93171	8.06838	7.87
Il21r	7.79701	8.93689	8.4991	8.08869	8.36997	8.36007
Hk3	10.1883	10.9358	10.1128	9.82943	9.78123	9.89375
Mdfic	9.13501	9.3913	9.31208	8.90024	9.0306	8.96686
Lhfpl2	7.31169	8.65038	7.78211	6.98709	7.17486	7.26934
Slco2b1	8.88553	8.9978	8.78543	8.79541	8.74876	8.50167
Casp1	8.26848	9.60206	8.59988	7.8425	7.83119	7.81835
Gda	6.09435	7.59023	5.81958	5.61607	5.91664	6.36255
Ccnd1	6.45271	7.87052	6.58832	5.72908	5.93063	6.18987
D12Ertd553e	5.80883	8.15237	5.88165	4.81624	4.94459	4.8872
Il4ra	6.61191	9.50033	7.37915	6.29541	6.47214	6.44533
Prkcb1	7.61338	8.43267	7.95506	7.51992	7.56511	7.55714
Rai14	7.79728	8.66166	7.36254	6.93561	7.25303	7.1101
Socs3	7.73148	8.79226	8.19595	7.69729	7.85757	7.55691
Coro1a	6.82676	10.6565	7.42038	6.49551	6.63822	6.43787
Chst1	9.89057	10.466	10.1939	9.8678	10.0633	9.94655
Npc2	7.08343	8.11074	7.06442	6.26367	6.35699	6.34365
Ddah1	7.88597	10.2142	8.67175	8.19324	8.24358	8.26357
Lyn	7.30745	8.23273	7.53163	6.41642	6.84543	6.48917
Tmed5	7.60599	8.86341	7.54772	6.79518	6.91097	6.80169
C1qb	6.89061	8.73432	7.26295	5.7506	5.81426	5.95146
Gna13	8.18332	8.20183	8.0374	7.52058	7.74846	7.45258
Mafb	11.9014	12.6802	12.2071	11.4085	11.7554	11.7658
Lypla3	8.87674	9.06154	9.18217	8.42931	11.0868	8.99781
Capg	6.88137	7.61591	6.93614	5.40418	5.78174	5.34051
Il10rb	6.00877	6.64531	5.76569	5.38165	5.29708	5.29563
EG433637	7.33831	8.04963	7.40225	6.25025	6.21004	6.25682
Ccdc109b	8.09027	10.5848	7.99768	7.18696	7.25874	7.33849
3110005G23	11.6593	12.6735	11.0863	10.5161	10.6013	10.6838
Clec4a2	8.80469	11.2238	8.91654	8.36929	8.24676	8.0098
Ccr1	10.7689	13.3381	11.5257	10.7359	10.751	10.5861
H2-Ab1	7.42979	9.30657	7.6589	6.51507	6.65634	6.52312
Nf1	8.28078	9.61907	8.84401	8.23158	8.4583	8.30103
Pthr1	6.41462	6.41462	6.60075	6.47349	6.98162	6.36219
Laptm5	8.15277	8.97101	8.46185	7.2662	7.3575	7.32025
Pla1a	7.09926	8.99562	7.08906	6.4527	6.55141	6.21841
H2-Aa	9.49075	10.7269	9.28491	8.68073	8.81399	8.90439
Evi2a	8.0038	8.58574	7.92596	7.24605	7.41656	7.34737
Fcgr2b	7.72137	7.83367	7.7604	7.13301	7.65027	7.31041
Ptger2	8.81144	11.8608	9.86204	9.35964	10.0379	9.5991
Gpr137b-ps	7.77191	9.41105	7.6858	6.85964	7.17813	6.83212
T2bp	6.46149	7.31011	6.47029	5.79371	6.20381	5.94489
Sema4b	6.8497	7.29851	6.9852	6.49447	6.47461	6.52796
Basp1	8.87199	9.6683	8.81368	8.38225	8.37411	8.44045
Cd300a	8.02327	9.30329	8.03948	7.10501	7.19973	7.10488
Cx3cl1	7.15977	7.98036	7.06776	6.8046	6.91976	6.7088
Gpnmb	7.03637	7.1502	7.01997	7.50853	7.71624	7.37186
Lrrc33	8.10531	9.47227	8.80827	7.98061	7.9482	8.02491
Ikzf1	9.1942	10.1666	9.31059	8.80979	8.79925	8.89501
Coro1a	7.04638	9.85451	8.03796	6.86156	7.04917	7.06292
Cd86	7.89071	9.87451	8.95365	7.54569	7.79897	7.98498
Irf8	8.77452	11.1034	9.98848	8.83462	9.00856	9.21378
Pdgfb	11.1251	11.8206	10.5818	10.2449	10.5401	10.379
Cyba	8.18316	9.88061	8.66822	8.00294	8.76071	8.48541
Syk	7.64378	9.49175	7.9257	7.01429	7.22844	7.02317
Nckap1l	5.94402	7.60259	6.24338	5.92171	6.20899	6.1426
Cotl1	6.46074	7.8851	6.50628	6.74126	6.46694	6.72205
Apobec1	8.60388	9.18376	8.89161	8.5308	8.71418	8.54159
Il7r	5.93609	6.70158	5.85615	5.96504	6.03286	6.09972
Lat2	7.76388	8.63665	8.25772	7.28293	7.28877	7.40203
Cd274	7.94205	9.34541	8.28388	7.74989	8.03569	7.90296
Gvin1	8.0528	9.66515	8.2471	7.70119	7.73492	7.87797
Ncf2	7.63202	9.61418	8.30358	7.27826	7.36625	7.48186
Cd22	7.37602	7.58284	7.31413	7.12466	7.27964	7.07979
Inhbb	6.48248	7.40224	6.69446	6.53375	6.46545	6.44558
Lpxn	6.8455	8.28267	7.13377	6.51315	6.61461	6.6265
Ibsp	7.79125	11.6152	8.07277	6.96204	7.15988	7.22504
Cd84	9.61252	11.8378	9.69838	9.33844	9.97978	9.4936
1500015O10	6.61367	8.02056	6.6782	5.72282	5.72362	6.04724
4632428N05	9.22493	9.45457	9.57203	9.16873	9.18441	9.26025
Thbs1	9.13402	10.4095	9.46139	8.94484	9.3781	9.19886
Marcksl1	7.63983	9.84138	7.75386	7.25223	7.1443	7.01878
Ddah1	8.52923	9.36123	8.29365	7.9254	8.14644	8.03317
Arhgap9	8.98025	10.2282	8.95287	8.28999	8.31182	8.47998
Sox4	7.68463	9.14171	7.83619	7.04245	7.11645	7.04181
AB124611	9.06124	9.99982	9.93951	9.90234	9.9247	10.1738
Tmem176a	8.47033	11.3128	8.66784	7.54914	7.66702	7.66883
Sap30	8.32361	9.57438	8.28404	7.88314	8.04449	8.01204
Tcirg1	9.77662	12.7351	11.837	10.6283	10.6317	10.7028
Lamp2	7.21779	8.2481	7.21476	6.70668	7.31727	6.9592
Nek6	7.70115	9.45268	8.11649	7.31759	7.67471	7.42465
Inpp5d	7.88858	8.48117	8.25059	7.68975	8.43412	7.99721
Gusb	10.0517	9.80448	8.9914	8.5033	8.81658	9.167
Il1rn	7.59338	7.39526	7.4435	6.45178	7.27946	8.39746
Sla	8.86192	10.0253	9.12991	8.83916	9.05014	8.96465
Clec4a2	9.31053	9.31053	9.27879	8.87355	8.64966	8.61483
Lilrb3	8.42128	9.19465	8.18047	7.79217	7.88935	8.0374
Lgals3	6.345	8.47787	7.04866	6.29357	7.53682	6.33889
Pld4	7.34594	8.22448	7.45126	6.74061	7.10356	6.85989
Trpt1	12.0883	14.4026	12.544	11.9866	12.0728	11.9787
Ccbe1	7.34111	9.27253	7.2162	7.24044	7.38056	8.76533
Arrb2	9.24273	11.1254	9.77101	9.07931	9.49377	9.20144
Col8a1	7.82821	8.74324	7.98181	7.59714	8.48852	9.04306
Cp	8.72073	9.66244	8.7852	8.41183	8.49539	8.51676
Anxa8	9.68409	10.6527	9.84043	9.38684	9.25665	9.29764
Arl4c	9.81498	11.1218	10.3631	9.69045	10.0208	9.70926
Evl	9.00802	10.8025	9.94279	9.34776	9.25563	9.52532
Rassf4	10.4763	11.8922	10.3448	9.74988	9.72109	10.0734
Ifi47	9.59541	10.326	9.73006	9.16255	9.28643	9.13352
Acp5	10.2638	11.2795	10.2825	9.78238	9.74403	9.84755
Cd38	9.45798	9.73818	9.72005	8.92198	9.12487	9.19371
Bst1	9.44486	11.2531	9.819	9.86631	10.032	9.92387
Tspan13	9.42764	10.2056	9.48099	8.90139	8.9743	9.04786
Ptpre	10.8659	13.3564	12.4809	11.6485	11.4549	11.505
Cd44	7.92166	9.62157	8.07756	7.73812	8.08297	7.89814
Ifi203	9.69557	10.5779	9.44316	8.94007	9.28783	9.06072
Ctsb	9.5784	10.4423	9.77434	9.21029	9.24136	9.25109
Tnfrsf1b	7.96185	8.62288	8.01932	7.11927	7.14153	7.2697
Cxcr4	7.84452	8.45984	7.67558	7.01455	7.16296	7.00362
Fcgr3	7.54773	8.01377	7.40043	7.40197	7.73578	7.38859
Fes	9.50024	10.7154	9.85262	9.46727	9.49039	9.26047
Mamdc2	8.4795	9.55581	8.78028	7.86414	8.23879	8.04663
Clec4a3	6.89435	9.4506	7.43488	6.6552	7.20388	6.99475
Ccr2	7.72934	7.99495	7.23925	6.83661	6.66266	6.9932
Ifnar2	7.55369	9.90394	7.98459	6.44405	6.35679	6.35327
Timp1	6.53582	8.15811	7.42944	6.5775	10.1907	8.14358
Pstpip1	9.83181	10.6488	9.67925	9.25194	9.2036	9.3318
Selplg	9.31003	10.4001	10.6242	9.20199	9.21415	9.11021
Plek	9.14236	10.247	9.78293	8.93108	9.61806	9.15006
Myo1f	6.35818	10.0591	8.11649	5.89647	6.52517	8.29332
Egr2	10.099	10.5935	10.1377	9.7864	9.84515	9.67711
Ly6c1	7.75382	8.24429	8.17249	7.46084	7.60791	7.69013
Ms4a6d	8.33568	9.43055	8.19479	7.53144	7.91494	7.6368
5830443L24	6.53079	7.68081	7.29825	6.34509	6.05906	5.97461
Slc37a2	8.12219	9.63863	8.07543	7.37202	7.50377	7.55744
Tmem173	9.1836	10.3715	9.92127	9.43065	9.18666	9.3842
Ccl3	7.18692	7.94203	7.49276	6.70519	10.0683	7.35017
Trim25	8.55881	10.5889	9.35288	9.17794	9.01602	9.22055
Fen1	6.50363	8.76039	7.57844	7.15414	7.07294	6.80104
Cndp2	6.75059	9.88901	7.05647	6.64051	6.9845	6.78431
Ugt1a6a	6.27828	7.94833	6.53165	6.36769	6.48013	6.3697
BC067047	8.78925	12.0945	8.79381	8.87967	8.7581	8.72609
EG622976	9.37066	10.1526	9.30661	8.77946	9.15985	8.98263
Arhgap25	10.0515	11.6711	10.3172	9.35788	9.48361	9.8853
P2ry14	7.96761	8.19252	8.06058	6.85002	6.85002	6.7179
Ifi205	8.90743	10.0014	8.91193	8.14767	8.08536	8.09516
Adfp	7.33328	8.56207	7.54165	6.95038	7.08936	6.61031
Rgs2	7.89919	9.11345	7.81869	7.0273	7.4995	7.16051
Hmga1	10.9979	11.5988	10.7858	10.5453	10.6225	10.5743
Sirpa	6.93943	7.57488	6.98676	6.21372	8.15134	6.71078
H2-Aa	8.33815	8.53843	8.18283	7.70457	7.89351	7.85193
P2rx7	7.25172	9.39345	7.46427	6.8032	7.40947	6.90041
Plk2	9.054	10.1863	8.99078	8.29415	8.44177	8.3933
Cd300lb	8.95955	10.5255	9.28735	9.03211	9.1348	9.18704
Pld3	5.85975	6.72214	6.25571	5.91524	5.74789	5.69916
Psat1	8.9251	10.7365	8.92063	8.40895	8.56728	8.59382
EG667410	8.69012	8.62022	8.6318	7.79165	8.555	8.17995
Ch25h	8.74323	8.58547	8.79468	7.88864	9.84984	8.12426
Unc93b1	7.09874	7.73748	6.74109	6.71166	6.94279	6.62845
Abcg1	7.18692	7.32227	7.37403	6.13253	7.93307	6.46069
Ftl1	6.41715	6.76209	6.49235	5.94811	6.15212	6.00396
Ugt1a6a	11.3793	11.767	11.1695	10.7431	10.838	10.7815
Cd200r1	7.02668	7.64173	6.93	6.19708	8.07982	6.5908
Ccr5	7.16026	7.7029	7.52517	7.36885	7.94526	7.55391
AV025504	7.83525	9.20397	8.2293	7.17294	7.1069	7.2137
Lgals3bp	8.36213	9.11311	7.96522	6.68269	6.64118	6.88335
Atp6v0d2	8.6168	10.9841	9.41202	8.59804	8.95917	8.88772
Ctsz	10.4766	13.3278	11.7091	11.4181	12.0961	11.7435
Stard5	10.2264	11.4477	10.3415	9.92973	9.98802	9.99691
Ccl6	10.1415	12.2099	11.1014	10.0758	10.1921	10.1526
Centd3	9.01748	10.0451	9.07402	8.80189	9.31473	8.96392
Nrp2	8.10135	9.34775	9.58533	7.96921	8.22249	8.24
Itgb8	8.79081	10.1891	9.02606	8.30334	8.40137	8.53573
Abca1	8.78702	10.7682	9.66467	9.75138	9.63209	9.64491
Ccr5	7.6818	8.54325	7.80977	6.63329	6.74984	6.72875
Rnasel	8.26792	8.9268	8.21913	7.67691	7.88739	7.74461
Mcoln3	7.54366	8.71593	7.45045	6.80106	8.23475	7.23063
Car13	7.9595	7.93221	8.015	7.55835	10.1657	8.53402
Anpep	7.7164	9.5184	7.6968	7.00998	6.87817	6.93636
Mmp3	9.88995	10.7081	9.93825	9.6173	9.69006	9.6333
Slco2a1	7.52801	8.03096	7.91612	7.32708	7.44718	7.30308
Atp6v1b2	6.86835	7.91099	6.99978	6.46351	6.67937	6.52969
Socs3	7.93811	8.32911	8.04105	7.36121	7.84838	7.36731
Pkib	7.07099	7.79855	6.85233	6.14531	6.33516	5.99326
Creg1	9.20278	9.37059	9.20278	8.64192	8.69186	8.68592
Bcl3	6.34425	8.80463	6.74048	5.44077	6.03563	5.3102
Myo5a	9.60672	12.2093	10.034	9.7602	9.9512	9.83306
Il18bp	7.78676	9.97215	7.69057	7.42396	7.50664	7.3577
Il6	9.44861	9.98042	9.75481	9.02052	9.22157	9.1142
Penk1	8.80373	8.91685	8.94322	8.88408	9.27685	9.01951
Sp100	7.26068	8.83411	7.38305	6.86826	6.96242	7.06862
Hpse	5.97125	6.23439	6.18806	5.71172	7.3307	5.61194
Ddhd1	6.2452	6.2452	6.25986	5.26955	5.62549	5.52914
Ccl6	5.88837	5.74895	5.7503	5.66094	6.29331	5.74341
Tfrc	7.04874	7.08209	7.12936	6.47656	6.4185	6.5964
Akr1c12	8.74742	10.6441	9.1822	8.63471	8.98689	8.63031
Pmaip1	4.99135	4.9368	4.97298	4.83304	5.71951	8.90025
Junb	9.57438	11.914	10.375	9.6574	9.9626	10.3972
Lipa	7.39508	9.92445	8.25556	7.44225	7.68527	7.96569
Enpp2	8.29311	8.44411	8.10954	7.71351	7.87034	7.61625
Cd180	9.56847	10.4495	10.1137	9.39798	9.70634	9.63454
Pgd	10.1502	11.0543	10.4001	10.6136	10.4683	10.5923
Sgpl1	7.50692	7.81291	7.35419	6.16301	6.4125	6.19236
9930013L23	10.8001	11.6049	10.8909	10.5136	10.8103	10.535
Trf	8.79935	10.1432	9.15402	8.9626	8.85364	8.9239
Spp1	6.69649	9.4507	7.25783	6.5329	6.7352	6.55716
Lpl	8.8237	9.68775	9.23857	8.90446	8.92478	8.93195
Sh2b2	6.77827	8.21133	7.37388	6.16694	6.08844	6.25729
Mafb	8.18926	7.8957	7.93968	7.48722	7.76671	7.54036
Tmem45b	10.8098	11.8853	10.8767	10.4821	10.4341	10.5034
Irf8	9.8877	14.0942	10.0912	9.88841	10.1734	10.0967
Ccr2	8.10384	8.21196	6.93	6.607	8.13899	7.19047
Pgd	8.0038	9.32344	8.6992	8.14356	8.51909	8.32737
Socs3	8.47033	10.179	9.26615	8.74557	9.41557	9.18639
Cotl1	9.02165	9.88661	9.02941	8.59002	8.66556	8.56393
Laptm5	8.46451	9.44806	8.54617	8.14568	8.75481	8.18874
Tmem106a	9.02432	10.4537	10.3358	10.3027	10.2963	10.06
Ms4a6d	10.6913	11.844	10.9206	10.6814	10.455	10.5737
C1qb	8.83604	10.6949	9.42707	8.66312	9.4792	8.88895
Pctk3	8.95074	12.9959	10.0282	9.42685	9.66514	9.44514
Rspo3	9.72207	11.569	10.9879	11.0069	10.5867	10.9756
Aldh1a7	5.92148	5.82288	5.93839	5.48965	6.11723	7.17978
Gpsm3	4.67712	5.12985	5.03837	4.56864	4.67698	4.64919
Sema3e	7.75026	10.3733	8.0603	7.18007	7.49728	7.38708
Ndg2	8.04951	9.33364	8.95365	8.3381	8.52827	8.3744
Ctsl	8.99418	10.78	10.0876	9.29158	12.4984	10.0842
Mal	9.36741	11.8183	10.3486	9.55051	13.955	11.9406
Csf1r	9.10417	10.0533	9.29957	8.96124	9.11719	8.94866
Runx1	8.96081	11.7058	10.1446	9.77849	13.4037	11.4701
Hgf	9.18153	8.93419	9.06866	7.78874	8.96629	7.94138
Rnf149	6.74438	6.7644	6.82701	6.23435	6.53425	6.2853
Sh3bgrl3	6.63343	6.75553	6.82674	5.85893	6.48753	6.00676
Tnfaip2	6.56354	6.8586	6.6449	5.8616	6.04726	5.83288
Ctsb	6.09925	8.12527	6.93941	5.97749	5.87563	5.70413
Galc	6.96503	8.88904	7.45615	7.79622	7.5221	7.14683
Evl	11.5859	12.4616	12.0493	11.4033	11.8627	11.5465
Msr1	6.88303	10.9808	6.60977	7.09646	6.54848	6.53925
Clec4n	7.08343	7.15977	7.15977	6.46867	7.24087	6.47309
Fgr	7.07215	6.77999	7.11575	6.13276	6.48143	6.36859
Cybb	4.77304	4.79253	4.86854	4.52617	4.84945	4.47365
Dnase1l1	6.71993	6.57031	6.58396	6.32128	8.00625	6.56887
AI607873	6.32872	6.30981	6.30981	5.64217	5.67215	5.4469
Prg4	5.147	5.13809	5.22947	4.67929	4.74764	4.69546
Ccl9	5.3882	5.3882	5.45195	5.46708	5.85039	5.33718
Sfpi1	6.17533	6.49429	6.40702	5.77876	6.52068	5.89999
1100001H23	10.1331	9.59808	9.89986	9.40868	10.5282	9.52389
Galnt7	8.18505	9.92191	8.62189	8.08916	8.36222	8.0715
Ccl2	7.94799	9.36881	8.27526	7.13627	7.30628	7.0601
Sla	8.52482	10.3747	8.86429	8.45709	8.70181	8.55082
Asns	7.55007	8.42706	7.94995	7.25369	7.13543	7.27427
Il7	7.45207	8.82323	8.38783	8.66182	8.22172	8.28192
Tlr1	8.12206	9.51308	8.07974	7.69664	7.43215	8.07108
2016-03-01	8.46451	9.02391	8.58533	7.65222	7.97462	7.7041
Dclk1	9.06268	10.2183	9.31594	8.85291	8.98717	8.90043
A130071D04	6.73413	9.41987	8.20436	7.2527	7.32246	7.74143
Msr1	10.8342	11.2233	10.6564	10.2412	10.2064	10.0006
Hhex	8.18678	11.3996	8.11599	8.27303	8.47802	8.33598
H2-K1	8.16634	9.15684	8.57618	7.67415	7.95652	7.74438
Dnmt3a	9.92758	10.7498	9.87758	9.67901	9.60094	9.54864
5430427O19	8.2115	8.8493	8.7144	8.34827	9.93316	8.59953
Lass6	6.75899	8.16985	7.76272	7.06148	9.66612	7.66465
Thy1	7.39388	10.8466	7.59103	6.2781	6.6504	6.55852
Lrg1	8.28003	10.2961	8.57834	8.08917	8.24315	8.21842
Myo1f	8.26898	10.7139	8.54617	8.1132	8.28831	7.99801
Irf5	8.8441	10.3845	9.17909	8.94944	8.97101	9.113
Atp6v1b2	8.39862	10.5861	9.97189	8.34283	8.55333	8.6982
Zfp217	12.2967	12.9724	11.8064	11.5137	11.3686	11.6926
Amdhd2	8.87083	9.08235	9.1165	8.58657	9.48041	8.65725
Snx5	8.29163	9.64431	8.10928	7.67327	7.76864	7.4438
H2-Q8	7.38185	9.33843	7.94312	7.16436	7.32379	7.02036
Crlf1	8.61548	8.92934	8.74077	8.22029	8.55371	8.38524
Lipa	9.4681	10.5007	9.27297	8.46665	8.49379	8.68219
BC013712	7.35638	8.75988	7.20512	6.16744	6.2907	6.3626
Gramd1b	10.5033	11.3028	10.6981	9.46898	10.4486	10.0621
C5ar1	8.94589	9.72723	9.70999	9.27609	9.11514	9.05028
Ccl9	8.59327	9.43895	8.56225	7.67449	7.84151	7.92983
Trim30	8.74958	9.56558	8.59869	8.01767	8.53365	8.6248
Rnf180	7.32156	7.87986	7.73095	7.0245	7.35197	6.86021
F630110N24	10.0163	11.8963	10.1136	9.40673	9.23222	9.3953
Msr2	9.169	9.48142	9.10821	8.91894	9.02304	8.93381
Crispld1	8.64776	8.72908	8.7964	7.75188	9.63518	7.86057
Rgs19	7.58484	7.81372	7.57393	7.13976	7.44786	7.34385
Tmem106a	6.54123	8.8969	6.4952	6.22364	6.50335	6.34313
Tspan14	7.64244	9.86241	8.03948	6.28095	6.59303	6.53602
Naip5	6.3928	8.41366	7.23751	6.07933	6.14345	6.18127
Pak1	8.12312	8.48994	8.09706	7.00044	7.10035	6.97684
Pkp2	9.26802	11.8033	8.93548	8.56778	8.52088	8.53015
Rab20	6.96089	7.88877	7.06326	6.73119	6.89062	6.82701
B4galnt1	7.22577	7.54637	7.08339	6.58695	6.87156	6.45324
Gngt2	7.07182	7.58272	7.72019	7.41969	8.29101	7.77406
Cd40	7.17981	7.90916	7.3612	6.81787	7.3917	7.13554
Pdgfc	7.29482	9.40337	7.5464	6.72819	7.25139	6.82556
Clec4n	6.06262	8.1238	5.94855	5.53216	5.5505	5.52356
Ptpre	8.62757	8.96743	8.37693	8.06128	8.12084	7.90797
Sirpb1	9.46981	10.7965	8.86323	8.43966	8.25374	8.23552
BB164513	6.63343	7.92873	6.95876	6.01121	6.12861	6.18367
Trim30	7.94844	8.4672	7.54258	7.44604	7.00594	7.26427
Hp	7.19101	8.55552	7.26381	6.71595	7.07286	6.87201
Lcp2	7.67808	8.24711	7.98648	6.95654	8.2154	7.25087
LOC100043424	8.40862	11.3127	9.11846	8.05017	8.28694	8.13433
1500015O10	9.41855	10.529	9.84552	9.20092	9.18734	9.29789
Tnfsf13	9.83667	11.9853	10.597	9.49064	9.34379	9.36108
Ptgds2	8.50161	10.6078	8.76007	8.16732	8.16664	8.21722
Plek	10.6115	11.8748	11.204	11.2802	11.1183	11.0688
9030625A04	8.9333	11.4414	9.82988	8.61076	8.96338	8.70673
Gmfg	7.42586	8.27526	7.54018	6.72613	6.78183	6.60034
Atp6v1c1	7.09806	7.63569	7.35753	6.84824	6.94193	6.84455
Klhl6	7.32164	8.26771	7.71442	7.34217	7.14576	7.34899
Fxyd5	7.08891	7.50236	7.1502	6.16732	6.18632	6.10917
Ms4a6c	7.60665	7.94792	7.57548	7.02294	7.22794	6.90247
Itpr3	8.15732	8.28312	8.03477	7.54914	7.68085	7.47462
Slc47a1	8.51169	9.9216	8.97629	8.46557	8.95156	8.73016
Naip2	6.83186	8.05719	7.23333	6.31889	6.69933	6.48934
Slc9a3r1	7.37139	7.66953	7.60704	7.17105	7.44805	7.28244
Sirpa	7.80313	9.45905	8.51147	7.65968	7.581	7.73647
Gda	8.75648	10.2219	9.02502	8.51953	8.46393	8.44608
Ptger4	6.87515	6.90982	6.87515	6.37196	6.46625	6.44017
Vav3	8.11287	9.47013	8.41627	8.02878	8.31439	8.0117
Tnfrsf21	8.67782	10.9991	8.89786	8.47989	8.55187	8.68254
Stfa3	8.16627	9.37172	8.84957	8.46732	8.51847	8.33719
Fuca2	8.28057	9.37191	8.80261	7.53027	7.47579	7.72073
P2rx4	8.58103	10.1216	9.09681	8.20836	8.46689	8.60461
Plxnc1	8.48252	10.3663	9.99262	9.56004	9.40012	9.52776
Ccl7	9.22309	10.1963	9.5497	8.98358	9.24429	8.94946
Serpina3m	6.65025	9.44346	8.1949	6.8377	6.75203	7.26379
Lgmn	6.77706	8.04339	7.47914	6.23107	6.27473	6.4909
Lhfpl2	6.96034	6.9663	6.59441	6.62282	6.63808	6.76329
Tuba4a	6.22459	9.10763	6.77022	5.66248	6.22452	5.99167
Ctsz	6.9978	8.59285	7.32542	6.77076	7.00945	6.8934
Rps6ka1	9.30981	10.3742	9.36028	8.60283	8.74963	8.55813
Itga6	8.15442	10.3301	8.00717	7.14666	6.87817	6.86521
B4galt5	8.90842	10.6375	8.36175	7.6024	7.66804	7.64796
Fcer1g	9.31672	10.7211	9.59371	8.84882	8.84316	8.75706
Tcrg	6.96821	7.59758	7.20019	6.95077	7.57881	7.16946
Pde2a	10.5937	10.7987	10.5689	9.78608	9.89632	9.69743
1200013B08	6.52395	7.42972	6.96593	5.74712	5.75505	5.75561
Ms4a7	7.29986	9.52433	8.1386	8.05424	7.83301	8.17535
Zmynd15	6.92897	8.12906	7.79781	7.13538	7.21043	6.85357
Epsti1	9.90403	11.9293	10.2945	9.68763	9.73777	9.69443
Pctp	9.49671	10.8844	10.0809	9.22998	9.94896	9.51989
1300002K09	10.8108	12.3283	11.0375	10.4128	10.3663	10.5735
Sema4d	8.57823	9.58203	8.60505	8.05382	8.15134	8.34271
Cndp2	10.2392	10.8516	10.5214	10.2493	10.5283	10.3071
Abca1	7.41043	8.45509	7.85251	6.81837	6.78725	7.23494
Rnf128	8.17181	10.0439	8.44793	7.762	7.60951	7.83973
Itgam	6.86801	7.10953	7.00263	6.00998	6.63984	6.0958
Slc43a2	8.72852	10.6014	9.37059	8.64823	8.87741	8.86206
Tmem180	6.5718	6.64174	6.68088	6.14051	6.29484	6.10242
Creg1	9.03958	9.57742	9.27967	8.67352	8.86909	8.7413
Bhlhb2	7.39562	11.2272	7.69754	6.82421	6.97191	6.95436
Sirpa	7.82068	9.23463	8.35421	7.59853	8.01015	7.44956
G530011O06	8.59496	9.44087	9.03845	8.28422	8.44425	8.43927
Il7r	7.38185	8.75726	7.79133	6.57219	7.02334	6.89274
Lrrc8d	7.84723	9.15755	8.07277	7.42099	7.57678	7.53605
Pitpnc1	8.28059	10.6558	8.34664	6.66858	7.30606	7.16631
Cysltr1	6.60197	6.71084	6.67906	6.52306	6.58049	6.49169
Cd38	8.81034	9.69872	8.75492	8.38533	8.63198	8.52008
Ptpro	5.84463	7.5955	5.88802	5.36049	5.32728	5.41328
Mpa2l	7.61542	9.35196	7.79495	6.62823	6.63746	6.55545
Tnfrsf22	7.57774	8.83889	8.36525	7.67565	7.73297	8.01472
Cd200r4	6.94438	9.0039	6.72668	6.14382	6.44001	6.23772
Npl	8.4414	9.70511	8.7229	8.29597	8.31923	8.3607
Pparg	6.09135	7.28798	5.96243	5.21138	5.28009	5.63237
Eps8	9.44273	9.8197	9.39712	8.68408	8.66324	8.77548
Galntl2	7.41621	8.80923	7.4435	7.00083	7.03439	7.18881
Rin1	8.60467	10.1139	9.01828	8.08387	8.18531	8.16053
Dnmt3a	10.7718	11.2766	10.9376	10.6188	10.6198	10.6321
Csf3r	10.7336	13.4466	11.9004	11.5774	12.2865	12.0249
Col8a1	5.13075	6.65675	5.17092	4.59752	4.71555	4.69516
Orm1	7.70784	9.1758	8.3775	7.56037	8.18222	7.90101
Saa3	6.84202	8.60373	7.13377	6.50997	6.84826	6.59313
Evl	8.74362	9.09282	8.96306	8.53225	8.77877	8.65004
Prkcb1	7.97054	9.59612	8.49007	7.47616	7.5045	7.58066
Rtp4	6.59489	7.41557	7.05573	6.9938	7.03404	7.28307
Tnfrsf11b	9.55779	9.75725	9.72412	9.26454	9.33301	9.27206
Mapkapk3	9.49548	10.4729	9.61186	9.17212	9.32433	9.33814
Camk1d	9.53677	11.7832	9.9955	9.65511	9.85161	9.77214
Lhfpl2	9.2556	9.91047	9.2556	8.77075	8.68895	8.70614
Il1rn	8.17705	9.18824	9.17952	8.19905	9.11855	8.44223
Gpr176	7.61542	8.65818	7.65722	6.86253	7.537	7.02174
Mogat1	7.64408	8.81606	7.98638	7.56243	7.78187	7.99924
Tbxas1	7.98785	9.95956	8.68024	8.29953	9.19369	8.44675
Mmp13	10.1572	10.9815	10.1287	9.7334	9.75498	9.69782
Prom1	10.3844	11.8545	10.7934	10.4197	10.3987	10.4722
Pappa	9.85989	11.656	10.3247	9.88444	9.67477	9.93886
Myo5a	6.36515	7.23574	6.15639	6.58453	7.32786	7.425
Ptgs2	8.23683	9.23113	8.4896	7.74624	7.89997	7.64209
Ormdl1	7.98311	10.103	8.41405	7.59474	7.82769	7.59284
Cklf	10.2117	10.782	10.3875	9.62484	9.82461	9.97166
Cxcl2	8.47033	8.48925	8.43504	8.00822	8.32858	8.12995
Nrp2	7.54494	8.54391	7.86619	7.14249	7.41648	7.31954
Cd44	6.78916	10.1019	6.88118	7.24476	6.82441	6.88098
Ass1	8.92561	10.4398	9.04709	8.55588	8.24946	8.78091
Ddit4l	8.63133	9.79953	8.98592	8.61678	8.83773	8.68126
Galnt12	7.82736	8.31268	7.83299	7.11223	7.38227	7.1183
Npy	9.20218	10.0458	9.52408	9.06813	8.97855	9.08565
Myc	8.51488	9.07665	8.55275	7.95312	8.05695	7.88332
Myo5a	9.11428	9.90297	9.44344	8.89566	8.31588	8.3858
Dpp7	8.83621	10.8895	9.16344	8.31697	8.21358	8.5593
Ncf1	9.46089	10.9198	10.0329	9.63851	9.62309	9.85315
Prkch	7.93415	10.0031	8.83952	7.90177	8.50996	8.25159
Samsn1	7.67438	9.00376	8.84179	9.50013	8.35193	8.88535
P2rx4	7.5575	9.02273	8.714	7.80175	7.84989	7.91575
Sele	8.75628	9.97657	9.29073	8.80187	8.92734	8.95311
Vav1	8.227	8.6639	8.15896	7.93264	7.83743	7.67496
Slc9a3r1	9.98971	12.8673	9.91028	9.78619	10.1006	9.90626
Fcgr4	6.45704	6.97456	6.41691	6.03586	6.79094	6.26108
Stk10	8.60793	9.19025	8.14425	7.52113	7.68811	7.72517
Runx1	10.4512	11.9147	11.2516	10.3871	10.7027	10.3128
Was	8.07659	11.1298	8.56589	8.53764	8.78024	8.37528
Comp	7.89378	10.4722	8.21803	7.92894	8.35057	7.87886
Gng2	7.89823	11.8562	8.80475	8.37239	8.53994	8.80948
Serpinb1a	6.53818	6.90525	6.53675	6.38906	6.67572	6.42833
Stxbp2	9.28996	12.7616	10.427	9.77881	10.2646	9.94321
AI467606	9.63421	11.9663	11.737	10.3964	10.8744	10.5768
Rassf5	7.77449	9.21872	7.87848	7.23512	7.72125	7.23315
Cklf	10.9876	12.1234	11.4409	10.9941	10.8687	10.9282
Abcb1a	7.57796	8.52866	7.86024	7.13549	7.77106	7.53819
Col2a1	7.97297	9.39238	8.38981	8.09052	7.99975	8.15885
Aldh1a2	6.91505	8.35538	7.68081	6.49638	6.26435	6.67589
Sema4a	7.64112	8.05506	7.63138	7.48661	7.681	7.51501
Cd300lf	7.93658	9.02699	8.30102	7.71227	7.59537	7.7239
Sh3bp5	8.03179	9.03559	8.34664	7.78056	8.17256	7.90583
Pak1	10.4841	11.8754	11.2805	10.3459	10.7254	10.3588
Gla	8.60363	9.53506	9.14663	8.88258	8.84701	9.05658
Abhd12	6.75072	8.56491	7.56016	7.22829	6.92935	7.11872
Gm71	7.56147	8.81263	7.92123	7.00529	6.87557	6.63859
BC032204	7.4221	8.80524	7.68787	6.71165	6.45836	6.91011
Gusb	6.79694	9.40566	6.67551	6.54964	6.49611	6.40446
Hhat	5.79497	6.02611	6.01583	5.28662	5.28362	5.30176
Clec5a	10.483	13.2266	11.1124	10.4251	10.3772	10.3992
Akna	6.40857	7.47548	6.65772	6.30321	6.12771	5.91559
C5ar1	9.19603	9.7462	9.14437	8.60201	8.85642	8.5743
Gpr35	7.19794	7.66829	7.26577	6.73749	6.84751	7.08633
Cnr2	7.12578	8.3145	7.59228	7.58025	7.67087	7.71898
Ebi3	6.73096	7.72557	7.23948	6.385	6.44969	6.35855
9430012M22	6.46818	7.78464	6.96648	6.30284	7.33005	6.63859
Gdpd1	8.24428	9.82875	8.08569	8.43497	8.3829	8.59953
Cyp7b1	6.88113	7.52896	6.728	5.67338	5.59455	5.41572
Gpr126	9.837	10.7287	10.028	9.67398	9.84644	9.81327
Met	9.67488	10.7895	9.94601	9.52896	9.5889	9.9383
Plek	9.13987	10.8498	10.1126	9.77174	9.92369	9.93172
Atp8a1	5.46584	6.77426	5.51696	5.14232	5.20245	5.1682
Slc40a1	7.55617	8.07931	7.31584	6.81413	6.99793	6.96352
Acsm3	5.63217	6.42636	5.78751	5.181	5.40233	5.42552
Esm1	7.25299	9.06847	7.60599	7.09306	7.39253	7.17546
Hmox1	7.72009	8.25131	7.80729	7.17041	7.48319	7.23155
Tec	6.39642	8.17601	6.86198	6.24388	6.0984	6.35235
Ddit4l	7.84467	8.85487	8.65513	7.47671	7.81527	8.01965
Lrmp	8.44201	8.55168	8.33286	7.75499	7.76996	7.85577
Ddit4l	8.31409	11.4349	9.26862	8.40316	8.52716	8.7867
Kcnk13	9.9294	13.1015	11.085	10.4534	11.5648	11.192
6330509M05	8.40726	10.351	9.90646	9.31791	8.8241	9.35009
Serpinb9b	6.36709	7.48634	6.52929	5.95239	6.04123	5.82045
2810457I06	6.8235	7.20589	7.04773	6.78315	7.27246	6.76592
H2-DMb1	9.6934	12.3255	9.85791	9.21306	9.19051	9.31919
Gm885	8.99543	11.6689	9.22424	8.44617	8.46548	8.58827
Cxcl14	7.65969	8.27526	7.96884	7.68944	7.57866	7.49972
AI465420	5.57054	6.68546	5.70208	5.3923	5.67006	5.37294
Gng4	9.05102	9.89383	9.07881	8.9385	8.84955	8.83286
Itga6	6.42374	7.1449	6.10673	5.61469	5.39295	5.67926
H2-Q1	11.6314	13.23	12.1162	11.719	11.6521	11.6234
Slc44a1	8.89252	10.1829	9.12135	8.59568	8.52329	8.41929
Clec2d	8.58412	9.1104	8.76283	8.53827	9.15347	8.67105
Emr4	8.52017	9.72891	8.9275	8.36533	8.35755	8.25745
Acaa1b	7.02136	7.89378	7.62982	7.54255	7.26605	7.6466
Aytl2	7.34613	7.85197	7.19236	6.61575	7.20888	6.94396
Nlrc3	7.90349	8.58017	8.00732	7.08909	7.28965	7.33583
Tnfaip8l2	7.27338	8.85274	7.65359	7.383	6.76435	7.34303
Ighg	6.63444	7.50495	6.25744	5.78248	5.88972	5.99005
Slpi	8.35832	9.95676	8.92468	8.13979	8.21381	8.09881
Igh-VJ558	6.25697	7.22401	6.31302	5.70184	6.00834	5.86616
2010001M09	7.24115	7.41523	7.21458	6.82378	7.07987	6.82615
Igl-V1	9.7726	9.10634	7.77234	8.40884	7.61987	8.57377
AI324046	6.18689	6.38119	6.18532	5.51226	5.6664	6.33347
Oosp1	5.71083	5.88675	5.63217	6.15222	5.91695	5.96339
Igk-V1	6.73886	7.87491	7.32185	6.87853	7.23859	6.59628
Igk-V38	5.15585	6.45592	5.97335	5.58789	6.2582	5.85803
Ighg	7.09892	8.41887	7.62089	6.79745	7.15091	6.75253
Gpr31c	9.51837	10.9669	9.53195	9.32209	9.37229	9.4546
Igkv1-117	4.97385	6.10343	5.26176	4.81108	4.85945	4.77894
Gm1499	10.2693	11.6773	11.1675	10.7376	10.761	10.9316
Hcst	7.65764	7.75874	7.75207	7.45166	7.06038	7.3225
Isg20	5.33314	5.63884	5.62202	5.10379	5.53882	5.30178
Igk-V19-14	7.00228	11.6415	7.51239	7.16912	7.22097	7.13069
Igkv14-111	7.65016	9.05807	7.42831	7.09198	6.92276	7.1581
Igh-VJ558	7.5135	7.9905	7.72611	7.10726	7.38604	7.12114
Igl-V1	8.75172	9.31255	8.78894	8.08868	8.1937	8.13437
Igh-6	8.52931	9.52551	8.95889	8.05804	8.22413	8.17961
Igk-V1	7.08933	8.04046	7.1585	6.27433	6.37941	6.37694
Igj	5.94265	6.71007	6.42903	5.69251	5.48682	5.67954
Igh-VJ558	8.94414	9.2475	8.95822	8.37945	8.86032	8.57202
Igh-6	7.97561	9.08363	8.31385	7.77203	7.52491	7.69529
Igh-6	6.1597	10.1397	7.80536	7.02827	8.0718	7.56549
Igh-6	6.60903	8.98689	6.90873	6.20815	6.18331	6.4062
LOC213481	9.09377	9.17564	9.09559	8.17773	8.65208	8.33776
2010309G21	6.92752	8.89106	6.98136	5.99021	6.32871	6.00742
LOC672450	8.21814	8.86789	8.44874	8.21691	8.0982	8.16958
Insl6	6.30711	12.3305	6.21887	5.60868	5.62444	5.57826
Fmn1	5.73482	6.36571	5.83108	5.38516	5.23452	5.4767
Igh	8.29849	8.69021	8.1095	7.59034	7.71319	7.76121
Igl-V1	5.83125	7.34476	6.06769	5.36681	5.32029	5.31818
Pou2af1	8.09818	8.97513	8.55475	7.98573	8.076	7.89694
2010309G21	6.91725	9.81363	6.73579	6.06453	6.05338	6.07672
Igh-6	5.81797	6.65346	5.73813	5.47209	5.50368	5.50577
Igh-6	7.2385	10.0266	8.06524	7.58815	7.59993	7.49832
Igk-V21	5.26986	5.37416	5.09447	4.93109	5.04942	5.65277
Dnajc12	7.49198	7.80891	7.6936	6.7209	6.75878	6.83749
A530030E21	6.40857	6.81612	6.16068	5.42104	5.06873	5.23681
Igk-V1	5.84833	5.79875	5.84833	5.42261	5.73331	5.7349
Glrb	5.34025	6.39555	5.57785	5.1131	5.02267	4.881
Cdc42se2	7.04065	8.90113	7.66656	6.83615	7.11141	6.88988
Abca7	7.81004	7.89847	7.78834	7.25106	7.51017	7.48467
St8sia6	10.6922	11.5642	10.8771	10.7265	10.7418	10.5921
Pdgfc	8.55351	9.97189	9.60976	9.66294	8.96993	8.83333
C130026I21	6.64817	6.55001	6.55001	6.4031	7.97143	6.83882
BC033915	8.92426	9.35041	9.15036	8.57439	9.33115	9.00065
Clasp2	7.46185	8.01594	7.23908	6.84481	7.0142	6.81788
Ankrd1	7.74084	9.82625	8.55255	7.49472	8.05561	7.7041
Igk-V1	7.76537	9.78614	7.83424	7.62399	7.73625	7.55317
Glycam1	5.82876	5.9611	6.01367	5.76239	6.95162	9.20697
Igk-V1	8.2285	9.18198	8.77976	7.91667	8.24143	8.09885
Prdm1	10.1189	11.8151	10.0411	9.48567	9.35562	9.374
Igk-V1	9.17553	10.859	9.93153	10.3065	9.97458	9.76994
Edem1	9.07544	11.485	9.35494	8.83599	8.97814	8.83407
D8Ertd82e	10.9277	12.6752	11.0835	11.0715	11.0661	10.8356
Ttc7	9.80249	11.4556	10.0829	9.37921	9.43479	9.53546
Thbs1	6.96096	7.08683	6.57114	5.82932	5.76947	5.59535
Grem1	8.33519	9.97165	7.66494	7.68991	8.0373	7.78883
Napsa	10.1998	11.8721	10.4762	10.2213	10.4779	11.0735
Tap1	5.45325	6.17908	5.89249	4.94508	5.04308	5.02787
AU020206	9.65835	14.0587	10.4028	9.52383	9.48918	9.70444
Igk-V1	11.0887	13.0804	11.6307	10.9306	11.345	10.9725
AI447560	7.86139	9.17132	7.79714	6.90899	7.18178	6.98893
Aldh3b1	8.98083	9.30973	9.06005	9.5678	9.68696	9.48917
Pscdbp	9.89258	11.5698	10.224	9.53334	9.70152	9.65308
Pscdbp	9.24747	9.69108	9.27203	8.67098	8.59929	8.68015
Thbs1	7.28108	8.32426	7.58591	7.05026	7.29641	7.06046
Cadm1	9.23009	10.8407	8.71493	8.98822	8.62685	8.28106
Myo1e	7.61542	8.25053	7.87238	7.17	7.30606	7.23116
St8sia6	7.41744	9.25183	7.6175	6.76542	7.36552	7.09769
Cd79a	9.88061	11.2681	9.71305	9.07872	9.16494	9.17965
Slc13a3	7.46605	7.89607	7.94672	7.5449	7.6999	8.6191
Kap	8.25091	9.80813	8.29491	7.88483	8.05344	7.96811
LOC10004655	7.55319	11.1924	7.8698	7.47023	7.82472	7.46965
Cd19	5.98193	9.85235	6.31822	5.48965	5.62053	5.56734
Igl-V1	10.5246	13.8742	10.9897	10.3584	10.6402	10.4919
Cxcr3	5.52604	11.7222	4.96832	4.69689	4.86879	5.08564
Gzmk	9.2486	12.4291	9.74163	9.22527	9.56744	9.31793
Ms4a1	9.52105	11.4823	9.46664	8.96857	8.93008	9.04664
Igk-V38	10.1732	10.8693	10.3694	9.94877	10.1052	10.0241
Ikzf3	9.72571	10.804	10.1642	10.1894	10.3785	10.3386
Derl3	6.8342	10.2363	7.69176	6.08373	6.59889	6.22088
Gimap8	8.69486	9.70256	8.77852	8.01906	8.14903	8.22459
A130090K04	8.4522	11.813	10.1022	9.0988	9.25755	9.75475
Igk-V1	8.23816	11.6773	9.69467	8.35056	8.84217	9.12915
Hook1	7.5745	9.06173	8.24519	7.6535	8.15759	7.73897
Igh-6	8.70131	10.7812	9.65833	9.00814	9.65996	9.01935
Tcrb-V13	9.04658	9.44373	9.06533	8.59456	8.77879	8.56387
Cxcl13	9.91609	12.0684	10.9586	9.78856	9.64137	9.65532
Sipa1	11.4865	13.1005	11.2293	10.7576	10.6393	10.9515
Fcrla	9.72785	10.8532	9.77219	9.10047	9.11065	8.96509
Igh-6	9.53602	10.5977	8.79893	8.73701	8.47102	8.85083
Gimap1	7.64187	10.716	9.14471	9.34211	8.52435	8.71192
AI504432	5.86559	10.7729	5.77162	5.31084	5.32932	5.48865
AI467606	6.49611	9.27508	6.99943	6.57613	6.70819	6.56019
Cxcl13	9.26343	10.7727	9.69689	9.26158	9.76381	9.36578
Nup210	8.44267	9.27913	9.27491	7.94198	8.10013	7.97462
AI504432	7.80726	9.63765	7.68878	7.6136	7.70615	7.68034
Wdr91	6.46096	13.4734	6.30681	6.45226	6.57332	6.47388
Uhrf1	8.73074	12.4185	8.77632	8.32998	8.49734	8.43755
H2-M3	5.60376	7.51685	5.42695	5.30404	5.52267	5.50605
D17H6S56E-5	8.22535	14.1291	8.39947	8.27772	9.92156	8.45307
Rspo2	7.9783	10.4524	8.02	7.54282	7.15445	7.62118
Rasgrp1	7.189	7.64755	7.39118	6.68518	7.09616	6.86242
Glipr1	6.87515	8.6242	6.74818	6.43574	6.46361	6.41201
5830462P14	6.55676	13.4545	7.04861	7.80702	7.28845	8.32891
Cd22	8.2164	9.49495	8.61075	8.16052	8.46515	8.34287
Limd2	6.77856	7.77667	7.19645	6.58399	6.1612	6.28055
Ptpn18	8.69343	8.67832	8.60708	7.50565	7.68561	7.47907
Sbno2	5.77952	6.88356	6.05248	5.52844	5.44231	5.49365
Pik3cd	7.88597	8.92313	6.67925	6.84612	6.9331	6.82581
A030007L17	10.0606	11.2054	10.6694	10.795	10.4595	10.4238
Cxcr6	6.80925	9.87734	6.81151	6.22652	6.68833	6.25521
Pik3ap1	10.6689	13.1175	10.5559	10.62	10.7625	10.6282
Nme1	6.60242	7.7	6.70087	5.89475	6.11058	6.21483
Samhd1	7.7422	9.63653	7.9097	7.49772	8.07644	7.77142
Arrb2	8.25793	8.53727	8.16767	7.03394	7.24804	7.02067
Pik3cg	6.89024	10.3416	8.12537	6.9304	6.44221	7.06806
Hist1h3a	10.7304	12.2296	11.4491	10.7719	11.103	10.9887
Nfkbie	9.43031	10.7208	9.48603	9.33524	9.39718	9.28434
Renbp	7.70857	10.8632	8.02056	7.26348	6.90743	7.11014
Tnfrsf13b	6.55676	7.60039	7.34994	6.70449	6.93169	6.91813
Cd14	7.69176	12.355	8.86988	8.79967	8.66168	8.50831
Il17ra	7.30464	8.52731	7.36484	7.25295	7.34961	7.18915
Sbno2	8.09737	8.2448	8.13078	7.68526	7.87289	7.71373
Ebi2	6.91939	8.20444	6.95857	6.52883	6.8362	6.51547
Pscdbp	6.4984	7.06645	6.68083	6.20687	6.01378	6.11876
Metrnl	7.13332	7.64194	7.32542	6.59173	6.85472	6.70799
BC035044	10.0654	11.3092	10.0593	9.98705	10.0221	9.80873
Ms4a4c	8.84873	9.4014	8.73041	8.25618	8.00716	8.19063
Tspan13	7.99787	9.11038	8.68186	8.25553	8.5402	8.45641
H2-Ab1	8.32662	9.53102	8.46444	6.69159	7.12217	7.10819
Slc3a2	10.007	10.6552	9.93145	9.23618	9.46278	9.32812
1810015C04	7.0508	9.66263	7.10744	6.43469	6.60215	6.34621
Sphk1	9.02003	9.76811	9.03641	8.45262	8.69533	8.60223
Efhd2	8.97517	9.59077	8.8286	7.97772	8.15166	7.91134
Cd3d	7.52697	11.0399	8.19173	7.68208	7.82473	7.50573
Alcam	5.43459	7.79425	5.20344	4.88829	5.1199	4.94023
LOC10003974	9.74011	11.7949	10.1542	9.73245	9.68067	9.84502
Raph1	9.44213	10.418	8.51392	8.29778	8.28568	8.36136
Galns	8.98276	10.3091	9.53046	9.00782	9.01796	9.1663
Plac8	8.82084	10.2353	8.91958	8.60601	8.57777	8.56087
Cd52	6.71381	7.88367	7.11931	6.30919	6.40554	6.48519
Ptpn22	7.52933	7.79992	7.67708	7.08049	7.11065	7.18862
H2-Oa	6.32163	7.02809	6.43952	5.64846	5.8023	5.58203
Slamf8	6.33414	6.79538	6.48213	5.85527	5.77187	5.89867
BC065085	9.30172	9.5568	8.95165	8.25585	8.23503	8.31995
Ripk3	8.34949	8.39294	8.48766	8.2297	8.82887	8.31828
Zbp1	9.64284	12.389	10.7798	10.4785	11.1408	10.7848
Ltbp2	11.4176	12.0221	10.4241	9.39013	9.45982	9.75421
Psmb9	8.23285	9.05078	8.37609	8.39733	8.42688	8.51147
Slamf9	8.51408	12.0603	9.40626	8.74635	9.30628	9.02393
Igk-V1	8.9142	9.87952	9.22124	8.70279	9.34413	9.03978
Lsp1	6.58835	8.23835	7.52534	6.01935	6.25972	5.90567
Padi2	7.79345	9.93076	8.35404	8.5238	8.30558	8.27618
Rasgrp3	8.22437	9.03651	8.5182	7.36927	7.5599	7.53203
Frrs1	7.38684	8.2265	7.77853	7.16032	7.62391	8.13732
Cd79b	10.0513	13.0234	10.4329	10.3147	10.7991	10.407
A130092J06	8.51914	11.1284	8.40591	8.63329	8.18741	8.39676
Il17ra	9.53109	12.0346	9.98536	9.45299	9.50965	9.51777
Lck	10.1529	12.2469	10.1611	9.67237	9.63133	9.6517
Tnfrsf13c	9.76195	11.9354	9.47509	9.19872	9.21589	9.21091
Tcrb-V13	9.68743	12.5061	11.5235	9.97825	9.95569	10.0098
Bank1	7.4371	8.99091	7.22124	6.89378	7.30976	7.07947
Gpr171	4.85486	5.60604	5.3551	5.00629	5.52747	5.18935
Ms4a1	8.94029	9.80622	8.83673	9.06575	8.85612	8.75305
Spib	9.73531	11.2895	10.5838	9.96539	9.99028	9.99727
Fcer2a	8.27233	7.95727	8.10681	7.40464	7.97269	9.38068
Gpr18	6.89383	9.72996	8.5785	6.90277	7.18943	7.10689
Tcrb-V13	9.74422	11.4822	9.95239	9.61654	9.66534	9.6144
Aytl2	8.73941	10.2284	8.87919	7.95494	8.22943	7.95128
Btla	7.33346	9.50912	8.48261	7.78148	8.20447	8.03999
Sell	8.64925	9.89786	9.36054	8.40435	8.43808	8.4596
Blr1	10.3337	12.5089	10.5634	10.5151	10.2636	10.2406
Sirpb1	7.62777	8.43181	7.94646	7.52904	7.64084	8.11902
5830411K21	9.09341	10.8456	9.7462	8.92445	9.93581	9.22721
Igk-V1	8.301	9.05817	8.63984	7.87276	8.04385	8.05551
Faim3	7.0755	7.98424	6.90901	6.41873	6.29887	6.35793
Ubd	7.26299	7.18418	6.97947	7.15501	7.00509	7.34416
Ighv6-6	9.16276	10.1366	9.58542	8.96892	8.81674	8.87797
Acsm2	6.17376	7.29015	6.58957	6.43075	7.14632	6.62813
Abca13	5.89365	6.36422	5.89978	5.52776	5.54328	5.53558
Lat	5.84302	7.34484	6.03354	5.10683	5.26368	5.25099
Pafah1b3	7.4725	7.76281	7.76281	7.20521	7.09072	7.78913
Siglecg	8.14172	8.3634	7.96268	7.62399	7.73221	7.51832
Tcrb-J	6.47774	8.48867	7.85784	5.99435	6.80043	6.76585
Cd28	7.08606	8.46838	7.78461	6.99764	7.18943	7.22599
Mki67	7.11529	8.5624	7.59128	7.13456	7.28015	7.04104
Arnt2	8.84401	11.3385	9.19641	8.4913	8.38746	8.43984
Cdt1	8.65815	11.1977	9.47955	8.90309	9.46765	9.38757
Tcra	7.85609	7.96475	7.681	7.23548	7.20166	7.25322
Slfn2	8.77981	10.3775	9.06031	8.71724	8.85134	8.77558
Osm	8.05506	10.2663	8.37999	7.87013	8.41049	8.11137
Dock2	7.14537	10.5069	7.12407	6.39408	6.74453	6.6504
Rasa3	8.40614	9.84644	8.97616	8.67901	8.50819	8.72816
Apob48r	8.53899	9.26191	8.66024	7.83771	8.03118	8.07515
Tmem178	7.98033	9.63249	8.71606	8.2238	8.491	8.54761
Rgs10	6.71323	7.90519	6.58823	6.27038	6.25827	6.13905
Gimap4	9.53075	11.4696	9.49853	9.3275	9.25782	9.29273
Xlr4b	6.52451	6.68667	6.8772	6.74085	7.07518	6.87412
Prdm4	5.87678	6.12267	5.96288	5.54011	6.20376	5.40175
5031439G07	6.27093	6.27093	6.27093	6.02698	6.14084	5.96427
Traf3ip3	8.03624	8.20154	8.08901	7.60888	8.03146	7.65341
LOC632329	7.83722	9.58984	8.31057	7.49772	7.69333	7.55285
Cd83	10.3688	11.6242	10.5915	10.1643	10.4111	10.3652
Tcrg	7.73215	8.4523	8.00916	7.51923	7.80297	7.52613
Pyhin1	8.47862	9.84361	8.90341	8.15271	8.53463	8.4115
Mocos	8.68109	9.4839	9.23071	8.7863	8.60939	8.71541
AW112010	7.83527	9.43919	8.55433	7.90713	7.8952	7.93456
Abca13	8.07616	8.62137	8.59455	7.31034	7.30112	7.35552
Ltb	6.41046	7.28187	6.69446	5.78823	6.2441	5.79717
Got1	9.12729	9.08975	9.08346	8.51773	8.52152	8.61995
Chst11	9.03212	10.6601	9.64738	9.15235	9.76018	9.51331
1810022C23	7.6706	9.25911	8.05937	7.39004	7.3188	7.52173
Cd86	8.29995	8.89275	8.31429	7.68536	7.68406	7.68198
Baz1a	7.63483	10.1884	8.63734	7.5291	7.57114	7.98978
Pik3r5	8.5674	10.8659	9.43049	9.11344	9.21954	9.34156
Mbnl3	8.41985	8.62797	8.36863	8.24118	8.55067	8.29409
Klrd1	5.93231	6.20272	5.85007	5.66673	5.64149	5.69099
Tgif1	7.71421	8.40221	7.92369	7.45062	7.68124	7.58454
Prkar1b	9.27625	11.9014	10.055	9.58606	10.1648	10.0877
A630038E17	9.06494	9.73681	9.17568	8.62775	8.52426	8.66556
Gdf3	8.44726	9.64345	8.83134	8.2519	11.9707	9.56257
Lst1	8.197	9.92517	7.86665	6.4357	6.40375	6.63892
Bmp2k	9.70286	11.0787	9.70996	9.08351	8.91283	9.04632
Nfkb2	8.52674	9.48426	9.03294	8.31208	8.34345	8.54653
St8sia4	8.43801	8.05115	8.154	7.57832	7.77535	7.67331
Tbc1d10c	7.28006	7.1041	7.19713	6.62957	6.83589	6.4992
Soat1	8.39145	8.25448	8.25448	8.05185	8.88588	8.20464
Ifi205	8.64325	9.66373	8.79752	8.15573	8.41151	8.08173
Csprs	9.46603	11.3188	9.72629	9.4943	9.44601	9.2543
Csmd1	10.2046	10.5017	10.1631	9.68783	9.79125	9.77212
Rrm2	5.22628	6.69619	5.45773	5.25893	5.24144	5.1719
Nckap1l	8.09216	10.1399	8.45338	7.30019	7.38444	7.49666
Cd3g	6.59341	7.75458	7.08209	6.29883	6.19421	6.36071
Zc3h12d	8.17865	9.03095	8.42476	7.35009	7.5417	7.30058
AI451557	8.81289	9.51646	9.049	8.57375	8.72517	8.56427
Arhgap15	9.30584	11.4987	9.74225	9.49371	9.28944	9.26018
Cadm1	7.04419	8.72735	7.54604	6.95546	6.61274	6.87602
Arhgap11a	6.69589	8.96184	6.97641	6.68852	6.72879	6.50004
Ptpn1	7.56301	8.34447	7.91722	7.27251	7.56711	7.29041
Igtp	6.67558	7.71051	6.90843	6.56059	6.81319	6.76198
Rftn1	9.15562	8.77839	8.97119	7.61158	7.74935	7.58385
Ifi205	8.67227	9.20977	8.75397	8.20176	8.13648	8.04429
Atp13a2	9.07396	9.51334	9.20391	8.69243	8.79489	8.56965
Pycard	9.27403	10.7646	10.5011	11.3481	11.2651	11.3824
Gatm	5.88897	7.98821	6.34273	5.42045	5.6998	5.83165
H2-Ob	11.4131	12.828	11.4785	11.1854	11.3501	11.1692
Itgal	7.59228	8.27059	7.28122	6.82243	6.90541	6.71052
EG626058	7.35387	7.87589	7.3559	6.4741	6.38529	6.57528
Cadm1	7.14731	8.69021	7.09339	5.99834	6.02113	6.01467
Parvb	8.98591	9.69119	9.21629	8.5609	8.55133	8.50054
Sh3bp2	9.76079	10.1566	10.077	9.57907	9.66219	9.67643
Atp13a2	9.16757	10.3676	9.23249	8.53751	8.30888	8.377
Myo1g	6.42903	7.80558	6.7358	6.3584	6.4909	6.32154
AI662270	9.37788	10.044	9.32485	8.81672	8.81713	8.761
Ftl2	7.03087	7.66177	7.5092	7.16135	7.39494	7.16247
Tcrg	6.1183	6.81161	6.13806	5.79951	5.75867	5.8932
Sbno2	8.42884	9.28581	8.23144	7.52183	7.97143	8.11824
Tcrb-V13	8.77385	10.3188	9.17378	8.54494	8.27215	8.87786
Gmfg	6.3389	7.28065	6.71381	5.79975	5.99012	5.82346
Tcf7	8.7205	10.1268	8.99085	7.83794	7.92465	7.81493
Mcoln2	8.0253	11.1559	8.66518	8.34786	8.24019	8.60468
Fcrla	8.78578	9.7303	8.93845	8.27813	8.22128	8.25774
Ccl21a	7.65934	11.3665	9.10766	8.08515	9.26649	8.58278
Spink3	9.2868	10.8616	9.4322	8.65564	8.7913	8.84196
Umod	9.05711	9.61949	9.37242	9.87751	9.99956	10.2114
Akr1c21	9.7253	11.1396	10.1882	9.68629	9.62795	9.5552
A430107P09	7.7215	8.22448	7.34893	6.89556	7.10883	7.40314
Umod	6.66155	7.81515	7.64335	6.65689	7.74254	7.19071
Klk1	7.79024	7.93779	7.89064	7.61843	7.06091	7.14306
Ly6d	9.05784	11.5771	9.1233	9.27237	8.9817	8.63709
Ly6e	7.92769	8.80401	7.96718	7.90829	7.88818	8.03101
Aytl1	7.69223	9.02368	8.43041	7.9461	8.57335	8.21453
Slamf7	8.31617	11.9308	8.7136	7.3575	7.72163	7.39281
Fgd3	8.31236	8.47883	8.20103	7.44158	7.79039	7.43657
Ms4a4b	8.36196	8.75545	8.54863	8.11091	8.24611	8.12399
Bmper	8.94994	9.85801	8.87162	7.94614	8.1647	7.98522
Plekhm1	7.10151	7.83324	7.54058	6.65778	6.6213	6.69114
Slc41a2	8.10624	8.11649	8.11649	7.53812	7.85066	7.49738
Ms4a6b	8.29966	11.4438	9.33046	8.28545	8.27874	8.30799
Comtd1	7.69283	7.73846	7.5554	6.64323	6.68585	6.58549
Cxcl9	5.89089	5.81241	5.83108	6.1156	6.65696	6.95769
H2-DMa	8.5957	11.1486	9.91824	8.67184	9.08807	9.23098
Pisd	7.9266	8.81295	8.42329	7.29441	7.96244	7.66404
Ms4a6b	5.6235	5.94879	5.73337	5.30339	5.71859	5.44671
9530048O09	6.78189	7.25937	7.14594	6.78894	6.87817	6.56335
P2ry10	8.02135	8.5264	7.85351	7.43909	7.5568	7.54786
Cyp7b1	7.84478	11.0082	8.89378	7.77842	7.73297	7.81155
Psmb10	5.17002	5.21242	5.26897	5.0023	6.65253	9.11743
Ncf4	8.05956	8.83075	8.39947	8.18521	8.54683	8.04836
2016-03-01	9.94042	11.6423	10.641	10.3018	11.3385	10.4636
Tnfsf13b	11.7661	13.5391	12.3743	11.5261	11.4574	11.5895
Srgn	6.88578	7.29791	7.2162	7.01084	7.33541	7.00231
3110001A13	8.45338	8.69034	8.40888	7.37065	7.36568	7.45448
Ifi203	9.12105	9.197	9.10949	8.72078	9.05659	8.9031
Pgs1	9.04661	10.1406	8.89643	8.31957	8.69313	8.58297
Abi3	8.08236	9.11699	8.4546	7.93793	7.90155	7.84683
A630001G21	6.68477	8.93214	7.2464	6.01923	6.01678	6.12246
Epsti1	6.44682	7.54673	6.27806	5.75342	5.84266	5.85919
Rhoh	7.11742	8.61274	7.11575	6.19659	5.97895	6.25418
H2-DMb2	7.89991	9.92517	7.62939	7.26806	7.40201	7.33642
Klk1	7.61221	9.87692	7.58601	6.46813	6.81754	6.4907
Slc34a1	5.61987	6.53806	5.92963	5.66865	5.58334	5.46902
Hao3	5.8293	8.08126	6.25431	5.84237	5.93207	5.96869
Mep1a	7.83933	9.04583	8.37271	7.74342	7.56883	7.53538
Ctsk	6.91556	7.63869	7.10248	6.53796	7.04482	6.7944
Ifi30	7.43533	8.14221	7.31686	6.97193	7.43953	7.05509
Acy3	10.3172	11.3641	10.4781	9.96388	10.3253	10.0935
0910001A06	6.56299	7.1217	6.52949	6.11528	6.2004	6.02549
Dclk1	7.21609	7.81568	7.71973	7.07799	6.9852	7.00705
Hmgb2	10.3048	10.1713	9.48911	8.81291	9.10077	9.3867
Apobec3	10.076	11.4565	10.2337	9.81146	10.0172	10.3247
Aldoc	6.80169	9.59214	7.82618	7.58329	7.76594	7.61684
Ahnak	8.42685	9.42476	8.35106	8.0724	8.23629	7.95978
Igh-6	8.99355	11.8284	9.72614	9.14927	10.3496	9.43967
BC013481	10.5994	12.6598	10.356	10.0627	10.234	10.0526
Ifitm1	8.24887	9.1452	8.25335	7.87704	8.17577	7.91212
Pyhin1	8.96093	9.953	9.34233	8.34388	8.58116	8.56759
H2-D1	7.55438	8.79206	8.12906	6.84498	7.07349	6.90635
Pgs1	8.83571	9.50139	8.97855	8.64302	8.6161	8.81819
Il1rn	6.40857	8.82721	6.27728	5.62437	6.49291	6.09319
Cd53	6.86993	8.08544	7.06747	6.22792	6.04975	6.07844
Hmha1	10.9285	12.1526	10.2756	9.70165	9.98107	9.86431
Rragd	7.63612	7.93282	8.02296	7.41683	8.33007	7.61859
9130017C17	7.83502	10.5877	8.87366	8.59772	9.12877	8.64356
Rab8b	6.18986	6.74826	6.39642	6.38242	8.51654	6.677
Arhgap15	6.79968	10.0978	7.23552	6.89309	6.93044	6.82114
Hck	8.60505	8.9161	8.92616	7.61619	7.84835	7.82691
