# Supplementary material for: Co-expression network analysis identified hub genes critical to triglyceride and free fatty acid metabolism as key regulators of age-related vascular dysfunction in mice
Source: Aging (Albany NY). 2019 Sep 12;11(18):7620–38. doi: 10.18632/aging.102275 (PMC6781998; doi:10.18632/aging.102275)
Supplement: Supplementary Table 4 [file aging-11-102275-s008.xlsx]

## Sheet: Sheet1
Supplementary Table 4. 125 genes matched to modules defined by dataset GSE10000
gene symbol	aorta-6m-rep1	aorta-6m-rep2	aorta-6m-rep3	aorta-6m-rep4	aorta-6m-rep5	aorta-6m-rep6	aorta-20m-rep1	aorta-20m-rep2	aorta-20m-rep3	aorta-20m-rep4	aorta-20m-rep5	aorta-20m-rep6
1600029D21Rik	5.222	5.4329	5.86187	5.1323	5.77342	5.25228	5.76902	5.97418	5.63512	5.89053	5.29425	5.39054
2010106E10Rik	3.20788	3.98398	3.36783	3.63304	3.58375	3.44161	4.02886	4.28466	4.13531	3.32048	2.85598	3.2962
4930485B16Rik	5.71854	6.04736	6.07749	5.9559	6.00071	5.76902	6.21897	6.59976	5.93738	6.4	6.25563	6.14445
Acyp1	4.7091	4.58686	4.45055	4.12845	4.26915	4.20215	5.09761	5.03298	4.66239	4.7588	4.06522	3.69932
Adcy1	4.7091	4.86162	4.88419	4.81967	4.83449	5.38047	3.69932	4.3421	4.4478	4.93813	5.60085	4.29081
Agxt	3.87758	3.98398	2.06985	3.87758	3.01315	3.72228	4.34506	4.01405	4.72055	4.40304	4.28774	4.4478
Akr1c12	2.71203	3.67129	3.87348	3.78903	2.92883	2.66067	3.8234	4.92037	3.80632	4.20541	2.43473	3.37364
Ankrd1	2.71203	-0.170805	1.10851	2.91296	3.58375	3.36199	4.17246	4.43117	3.50652	3.83187	3.1138	4.20541
Aox1	4.12845	4.24716	3.87348	4.26915	3.961	4.28002	4.78302	4.20867	4.63846	4.53853	4.06522	4.11811
Aqp9	3.58124	3.67129	3.69932	4.04716	3.92188	4.56671	2.19325	3.14131	4.13531	2.69821	3.44161	3.57873
Arhgap24	4.58686	4.52554	4.22162	4.3	3.961	3.83187	3.36783	3.14131	4.01033	3.16161	2.95232	4.02517
Ass1	5.3848	5.69204	5.60827	5.30341	5.57587	5.41611	5.78655	5.84837	5.61931	6.06767	5.39126	5.61564
Ass1	4.58686	3.88166	4.19561	4.09014	3.8234	4.35977	3.14131	1.71521	3.80632	4.02886	3.83187	3.21438
BC013712	4.38013	4.64087	3.50652	4.74092	4.10768	3.92979	5.8247	4.28466	4.40588	4.47238	3.92188	3.81489
BC026585	4.12845	4.07596	4.30305	3.87758	4.10768	4.15906	4.12845	4.3421	4.47238	4.88825	3.92188	4.02517
C1qa	5.553	5.66623	5.43568	5.27885	5.54787	5.74232	5.64717	5.94326	5.78655	5.7909	5.53237	5.56194
C530028O21Rik	3.8234	2.69821	3.87348	3.68537	3.44713	4.11811	4.38876	4.07952	4.01033	3.83187	3.16161	3.37364
Cab39	5.39769	5.13743	5.0888	4.38876	5.23643	5.52716	5.76902	5.76902	5.60827	5.42173	5.35866	5.48215
Camp	6.83645	6.73118	6.91675	6.85162	6.85837	6.73514	6.5403	6.25955	6.44898	6.57476	6.39071	6.50035
Ccl5	9.25687	9.1314	9.65916	9.12458	8.96413	9.80767	10.102	9.61829	10.011	9.51251	9.62035	9.14208
Ccr5	4.12845	4.38876	4.22162	4.20215	4.37724	4.65525	4.89635	5.6792	4.77645	4.70219	4.51243	4.4478
Cd48	5.52716	5.49687	5.43568	5.30341	5.15947	5.71854	5.76902	5.97418	5.68739	5.46864	5.12887	5.39054
Cd68	3.36783	3.88166	4.13873	3.68537	3.2962	3.83187	3.57873	5.13572	4.2629	4.20541	2.65113	4.37434
Cd83	5.62785	5.85046	5.88748	5.17785	5.51538	5.6792	6.00446	6.29673	5.93738	6.15377	6.02722	6.00446
Cd84	3.98398	3.88166	3.92584	3.87758	4.01405	4.11811	3.8234	2.99819	3.36199	3.26528	3.92188	3.6427
Cdkn1b	3.65229	3.10684	3.87348	2.63187	3.51706	3.59872	4.4615	4.4615	3.44161	4.02886	3.70394	3.75826
Cps1	5.62785	5.75127	5.78	5.7909	5.64717	5.81726	5.8247	5.90765	5.91962	6.16345	5.42173	5.76128
Csf1r	8.45529	8.39986	8.59739	8.18957	8.44859	8.55055	8.86312	8.73975	8.76511	8.4949	8.64066	8.47907
Cybb	4.12845	4.58686	4.37724	4.04716	4.47238	4.02886	3.8234	3.69469	3.90993	4.37434	4.64568	4.55397
Cyp2b9	4.8154	5.16283	5.04759	5.20255	5.12543	5.17119	5.46592	5.31554	5.20906	5.36378	5.09761	5.0888
Cyp4f15	7.65933	7.41566	7.83914	7.85792	8.02658	7.74463	7.30331	7.45952	7.52495	7.74701	7.8237	7.92698
D14Ertd668e	5.51012	4.99955	5.33354	4.89837	5.15947	5.23323	5.81459	6.53803	5.59216	4.98538	5.56066	4.58686
D14Ertd668e	7.30692	7.34901	7.4614	6.89999	7.44975	7.68	7.63171	7.68614	7.80702	7.4614	7.50606	7.29529
Dclre1c	5.96603	5.8629	6.02768	6.25641	5.97848	5.76902	5.53237	5.86187	5.31403	5.89053	5.71282	5.96844
Dok2	3.44713	3.83187	4.22162	3.92584	4.01405	2.12599	4.57682	4.04351	3.80632	5.00517	3.75381	4.25033
E2f7	5.04578	4.75658	4.51769	4.48585	4.33913	4.11811	3.8234	3.69469	4.66239	3.67129	4.55141	4.58686
Exo1	3.65229	4.24716	4.51769	4.63846	3.92188	4.38876	3.44713	3.81489	3.03532	4.16577	4.02886	4.06881
Fads1	6.20763	6.05597	6.31081	6.38065	6.41768	5.99883	5.94326	6.20519	5.52586	5.74904	6.24338	6.2975
Fbln5	6.59168	6.64911	6.07749	6.54159	6.89419	7.07715	5.96555	6.25955	6.321	6.48029	6.64191	6.85993
Fcgr1	10.1614	10.3838	10.0101	9.94604	10.1099	10.8177	10.8102	11.1142	10.6189	10.8411	10.9156	10.7619
Fetub	12.9785	12.9137	13.2822	12.7209	12.7859	13.1912	13.3178	13.2117	13.3731	13.0936	13.046	12.9765
Fgf8	3.77153	4.3212	3.97827	3.78903	2.92883	3.83187	2.19325	3.07152	3.69469	3.32048	3.44161	3.6427
Frzb	5.63875	4.91041	5.7909	5.7646	5.36597	5.32457	4.83975	5.3848	4.69757	5.36378	5.81459	5.30797
G6pc2	3.20788	4.07596	3.36783	3.82764	3.44713	3.56356	3.2962	2.99819	2.96007	3.46357	3.75381	4.02517
Gal3st1	6.70837	6.00446	6.63829	6.44139	6.51685	7.18993	7.25749	6.994	7.5902	6.57476	6.58981	6.44139
Galnt3	9.70856	9.8797	9.74985	9.72836	9.61408	9.82036	9.98612	9.98149	9.98571	9.91063	9.8162	9.7524
Galt	4.45877	5.23483	4.75658	3.95326	3.92188	4.69293	3.8234	4.01405	3.69469	4.16577	4.52554	4.4478
Gdf10	3.87758	2.69821	3.87348	3.16161	2.4458	3.36199	3.50652	4.01405	4.18903	4.29081	2.43473	3.44713
Gjb3	3.77153	3.16161	3.2962	3.45811	3.2962	3.47443	2.19325	3.47443	2.85598	2.27002	3.26528	3.81489
Gp49a	5.82735	5.66623	5.50549	5.1323	5.4329	5.17119	6.11873	6.41698	6.46336	6.48029	6.79861	6.30702
Gpnmb	2.95232	4.02886	3.14131	3.78903	2.69821	3.14131	3.8234	3.92979	4.51243	3.71772	3.02058	3.92584
Gyk	4.96724	5.08704	4.98063	4.99201	5.42032	4.58936	5.66505	5.83474	5.63512	5.7646	5.65076	5.42872
H2-DMa	4.92037	5.3848	5.06835	4.81967	4.26915	5.21555	6.13251	5.83474	4.4478	6.34929	5.42173	4.96339
H2-DMb1	4.45877	4.45877	4.63846	4.20215	4.53075	3.83187	4.12845	4.07952	3.62818	3.83187	4.47238	4.02517
H2-DMb1	4.45877	4.45877	4.63846	4.20215	4.53075	3.83187	4.12845	4.07952	3.62818	3.83187	4.47238	4.02517
Hic1	7.02756	6.42959	7.36878	6.84222	6.17971	6.97095	7.45832	7.73985	7.09309	6.69567	6.94581	6.65628
Hic1	3.98398	4.45877	3.97827	3.57873	4.33913	3.83187	4.66476	4.59931	4.51243	4.47238	4.20215	4.3272
Hpgd	3.58124	2.91296	3.97827	2.91296	3.58375	3.36199	4.02886	3.77153	4.13531	3.98398	3.32048	2.96007
Hs6st1	4.76102	4.69988	5.67332	4.99201	4.96916	4.75435	5.85358	5.46592	5.43568	5.56702	4.75658	4.93813
Hs6st3	5.09761	5.04578	4.85541	4.6906	4.4478	4.72055	5.25701	5.35132	5.07282	4.81327	4.86781	4.58686
Ifi47	3.70394	3.83187	4.57934	3.95326	3.92188	4.15906	3.87758	3.63787	3.50652	0.897474	3.99155	3.69932
Ifit3	5.13914	5.16283	4.72283	5.08438	4.95179	4.95567	5.37179	5.19107	5.0888	5.36378	4.95179	4.88419
Igfbp2	13.6217	13.5408	13.5637	13.7076	13.8053	13.4846	13.457	13.635	13.0967	13.4263	13.5812	13.7549
Igfbp2	4.30305	4.02886	4.22162	4.76544	4.33913	4.24399	4.02886	3.85283	3.57873	3.87758	4.59683	4.4478
Igfbp4	12.4743	12.4199	12.8044	12.3537	12.4811	12.7193	12.884	12.7823	12.8215	12.5997	12.5791	12.4423
Il10ra	4.58686	4.52554	4.30305	4.22483	4.76102	4.88419	5.12887	5.00517	4.82604	5.09057	4.10768	4.4478
Insm1	2.85182	4.02886	3.92584	4.04716	3.961	3.56356	4.4615	4.57934	3.80632	4.4478	2.65113	3.14131
Irf7	4.67891	5.20255	6.23821	4.94595	4.58936	4.31518	4.51243	4.63362	3.20788	4.12156	4.7091	4.52293
Itgb2	8.2755	8.36062	8.32844	8.57613	8.47299	7.98317	8.25469	8.11802	7.83414	8.09842	8.14991	8.43198
Itih3	8.72334	8.71757	8.97755	8.79289	8.77941	8.87828	8.74522	8.54299	8.1076	8.2173	8.47257	8.48361
Itih4	7.8864	7.72075	7.58081	7.35159	7.80944	7.47125	7.38937	7.20814	7.24941	7.31676	7.2237	7.48608
Kbtbd10	7.2882	6.31005	6.83171	6.503	6.06498	6.04144	5.94326	6.01287	5.80602	5.5934	5.87371	5.95493
Kit	7.14137	6.70319	6.5589	6.62708	7.04041	7.2399	7.34458	7.19835	7.62807	7.13004	7.20407	7.00036
Lair1	4.8154	4.24716	4.83449	4.84708	4.76102	4.20215	5.16952	5.00517	4.80469	4.96147	4.45604	4.52293
Luc7l2	3.87758	3.98398	3.75826	4.04716	3.51706	3.78903	4.02886	5.57082	4.33616	4.4478	3.02058	3.98017
Ly86	10.444	9.93963	10.0351	9.64617	9.94723	10.4652	10.4115	10.8294	10.8631	10.7267	10.9132	10.745
Mgst2	8.50263	8.4112	8.14206	7.67176	6.98715	8.00662	8.68683	8.70675	8.93157	8.29457	8.67878	8.27103
Mmp2	3.92584	3.10684	3.97827	2.37803	4.22162	4.11811	2.75274	3.38519	2.49994	3.32048	4.37724	3.57873
Mrc1	3.98398	3.88166	4.05441	3.26528	3.2962	3.88573	4.3	5.00517	4.69757	4.02886	4.31518	4.16242
Ms4a4d	5.33354	4.61902	5.57587	5.46183	5.09761	5.90464	6.01937	7.24109	6.24298	5.84628	5.42173	4.93813
Msx2	9.38575	9.90286	9.21652	9.90274	9.66436	9.45291	10.1578	10.0471	9.86436	10.0075	9.97882	9.99516
Mx1	5.62785	4.38876	5.36743	4.12845	4.10768	4.63241	2.85598	3.55846	3.80632	3.59375	5.0888	4.25033
Myo1f	6.22702	6.55954	6.06498	6.06318	5.82841	6.2222	7.10318	6.59106	6.65509	6.92147	7.10798	6.76805
Myo1f	4.58686	4.55653	4.51769	4.74092	4.51243	4.42838	2.63187	3.58375	4.18903	4.12156	3.99155	4.02517
Nid2	5.78655	5.8976	5.84941	6.3419	6.20926	5.92951	5.46592	5.86187	5.59216	5.86187	6.02722	5.8515
Nova1	7.33195	7.49177	7.22872	7.30331	7.10275	7.42496	7.45302	7.90733	8.02139	7.79218	7.81985	7.53098
Npl	3.44713	2.91296	3.75826	2.82238	3.65229	3.06436	4.38876	3.38519	3.69469	4.20541	3.02058	3.14131
Oit3	3.77153	3.83187	3.97827	3.82764	3.87348	3.72228	4.52815	4.28466	4.33616	4.40304	1.7864	4.06881
Pfkp	3.58124	3.55846	3.87348	3.68537	4.01405	2.66067	4.69988	4.01405	3.80632	3.92979	3.65706	2.96007
Pilra	3.36783	4.45877	4.05441	3.87758	3.70394	3.92979	2.96777	2.55212	3.90993	2.91296	4.12845	3.87348
Pilra	4.02886	3.88166	3.50652	4.20215	3.58375	4.20215	3.69932	2.66067	3.74935	3.59375	3.92188	4.16242
Plek	3.58124	4.07596	3.69932	4.12845	3.70394	3.47443	4.4615	4.3421	3.90993	3.92979	2.95232	2.96007
Pprc1	6.79915	7.24387	6.81899	6.84222	7.06508	6.79591	6.42959	6.73486	6.71525	6.73203	6.85837	7.01484
Prkcb	2.95232	3.46357	3.87348	3.00569	3.70394	3.06436	4.12845	3.92979	4.18903	4.3272	3.56356	4.25033
Pten	4.38013	4.38876	4.51769	4.38876	4.67891	3.59872	4.83975	4.6836	4.59931	4.86575	4.34506	3.6427
Ptpro	12.1114	12.097	12.0313	12.1231	12.1669	12.1333	12.2594	12.3463	12.3584	12.4184	12.301	12.3213
Rasa4	9.35069	8.0612	7.35085	8.02727	8.86467	8.36108	10.3126	8.77324	9.50959	8.99438	9.14166	9.19196
Retnla	3.2962	3.26528	3.63787	3.78903	3.70394	3.92979	4.59931	4.52293	3.80632	3.98398	3.7977	3.5118
Ropn1	7.13689	7.00551	7.2569	6.44967	7.0878	7.11016	7.38488	7.27603	7.36642	7.28029	7.07046	7.11992
Rps8	5.79632	6.0286	5.78	5.90264	5.45225	5.86187	6.10001	5.84837	6.43446	5.95299	5.45088	5.76128
Sc4mol	4.38013	4.12156	4.69988	3.63304	4.78738	3.47443	4.12845	4.92037	5.35866	4.7319	4.34506	4.16242
Sema5a	4.12845	4.55653	4.45055	4.01405	3.8234	4.63241	3.92584	3.77153	3.80632	3.92979	4.7091	4.65287
Sema6c	3.65229	3.67129	2.85598	3.32048	3.65229	3.20788	4.66476	3.81489	3.80632	4.29081	2.16001	3.92584
Serpina1d	7.50524	7.9943	7.75412	7.65754	7.77225	7.56915	7.99382	8.09886	8.01234	7.95244	7.88944	7.74589
Serpinb6b	11.4103	11.2214	11.5483	11.2116	11.2722	11.6102	11.8924	11.7343	11.6957	11.4092	11.46	11.2942
Sh2d2a	7.58175	7.52544	7.46718	7.66334	8.20839	7.82078	7.1889	7.28954	7.51233	7.66911	8.00428	7.90758
Sim1	4.38013	4.3212	4.01405	3.95326	4.37724	3.98398	4.34506	4.43117	4.4478	4.93813	4.12845	4.29081
Slc15a3	4.38013	4.38876	4.51769	4.57682	4.7068	4.69293	5.35279	4.80469	4.92037	4.64087	4.06522	4.96339
Slc9a9	3.87758	2.69821	3.50652	3.68537	3.58375	4.02886	4.4615	4.59931	3.69469	4.86575	3.92188	4.37434
Slpi	5.66623	5.88443	6.05144	5.77781	5.63512	6.55699	6.75085	6.36104	6.24298	5.97896	5.29425	5.42872
Socs3	5.26172	5.56955	5.36743	5.70363	5.45225	5.46592	5.78655	5.93148	5.43568	5.7646	5.29425	5.24596
Sox11	9.73716	10.0717	9.68561	10.1443	9.92752	9.8502	9.14686	9.87112	9.10588	9.45779	9.57536	9.8205
Spry1	1.7864	1.7864	2.64153	3.57873	4.01405	3.36199	3.69932	4.13873	3.14131	3.98398	3.02058	2.96007
Srebf2	4.12845	4.35977	4.45055	4.3272	4.33913	4.02886	4.21516	3.38519	3.44161	3.83187	3.75381	4.16242
Tcf21	2.71203	3.71772	3.97827	4.38876	4.05441	3.47443	4.66476	4.20867	4.04716	4.37434	3.1138	4.11811
Thrap3	4.12845	4.45877	4.05441	3.95326	3.58375	3.92979	4.17246	4.92037	4.2629	4.29081	3.87758	3.14131
Tmc1	6.22702	5.60085	5.4048	5.03665	5.56194	5.978	5.95493	6.2406	6.41134	6.27749	6.04508	6.33819
Tnfaip2	7.67765	7.8415	7.70441	7.75329	7.72075	7.45319	7.39759	7.44217	7.41917	7.54939	7.64453	7.63141
Tnfaip2	12.1238	12.2605	12.3556	12.2534	12.1895	12.2292	12.3567	12.5298	12.4875	12.4276	12.3489	12.2791
Tnnc2	7.08249	7.17856	6.96951	6.87997	7.05743	7.30331	7.14434	7.23092	7.68058	7.43211	7.27584	7.21118
Trem2	3.20788	3.98398	2.85598	3.00569	2.69821	3.2962	3.8234	4.28466	3.69469	3.87758	3.59375	3.92584
Tyrobp	3.70394	3.71772	4.30305	3.26528	4.26915	3.59872	4.3	4.78302	3.84866	6.10395	4.47238	4.40304
Upp1	4.08307	3.46357	3.2962	3.78903	3.58375	4.15906	4.38876	4.4615	4.10069	3.71772	2.43473	3.14131
Vcam1	4.02886	4.16577	4.37724	3.45811	4.01405	4.58936	4.2629	4.40019	4.87602	4.57682	4.2629	3.92584
Vps52	6.62739	6.68753	6.44209	5.9559	6.20111	6.2406	6.45448	6.94874	7.02434	6.88456	7.01065	6.54159
