# Supplementary material for: Co-expression network analysis identified hub genes critical to triglyceride and free fatty acid metabolism as key regulators of age-related vascular dysfunction in mice
Source: Aging (Albany NY). 2019 Sep 12;11(18):7620–38. doi: 10.18632/aging.102275 (PMC6781998; doi:10.18632/aging.102275)
Supplement: Supplementary Table 5 [file aging-11-102275-s007.xls]

## Sheet: GOEnrichmentTable
Supplementary Table 5. GO enrichment terms of the genes within the significant modules
module	modSize	bkgrModSize	rank	enrichmentP	BonferoniP	nModGenesInTerm	fracOfBkgrModSize	fracOfBkgrTermSize	bkgrTermSize	termID	termOntology	termName	termDefinition
blue	194	188	1	0.00240934	1	33	0.175532	0.6	55	GO:0006955	BP	immune response	Any immune system process that functions in the calibrated response of an organism to a potential internal or invasive threat.
blue	194	188	2	0.00319573	1	46	0.244681	0.554217	83	GO:0002376	BP	immune system process	Any process involved in the development or functioning of the immune system	an organismal system for calibrated responses to potential internal or invasive threats.
blue	194	188	3	0.00492582	1	16	0.0851064	0.695652	23	GO:0030097	BP	hemopoiesis	The process whose specific outcome is the progression of the myeloid and lymphoid derived organ/tissue systems of the blood and other parts of the body over time	from formation to the mature structure. The site of hemopoiesis is variable during development	but occurs primarily in bone marrow or kidney in many adult vertebrates.
blue	194	188	4	0.00492582	1	16	0.0851064	0.695652	23	GO:0032880	BP	regulation of protein localization	Any process that modulates the frequency	rate or extent of any process in which a protein is transported to	or maintained in	a specific location.
blue	194	188	5	0.00602373	1	12	0.0638298	0.75	16	GO:0002521	BP	leukocyte differentiation	The process in which a relatively unspecialized hemopoietic precursor cell acquires the specialized features of a leukocyte. A leukocyte is an achromatic cell of the myeloid or lymphoid lineages capable of ameboid movement	found in blood or other tissue.
blue	194	188	6	0.00716208	1	9	0.0478723	0.818182	11	GO:1903706	BP	regulation of hemopoiesis	Any process that modulates the frequency	rate or extent of hemopoiesis.
blue	194	188	7	0.00716208	1	9	0.0478723	0.818182	11	GO:1903827	BP	regulation of cellular protein localization	Any process that modulates the frequency	rate or extent of cellular protein localization.
blue	194	188	8	0.00874434	1	15	0.0797872	0.681818	22	GO:0051223	BP	regulation of protein transport	Any process that modulates the frequency	rate or extent of the directed movement of a protein into	out of or within a cell	or between cells	by means of some agent such as a transporter or pore.
blue	194	188	9	0.00874434	1	15	0.0797872	0.681818	22	GO:0070201	BP	regulation of establishment of protein localization	Any process that modulates the frequency	rate or extent of the directed movement of a protein to a specific location.
blue	194	188	10	0.00978333	1	17	0.0904255	0.653846	26	GO:0002520	BP	immune system development	The process whose specific outcome is the progression of an organismal system whose objective is to provide calibrated responses by an organism to a potential internal or invasive threat	over time	from its formation to the mature structure. A system is a regularly interacting or interdependent group of organs or tissues that work together to carry out a given biological process.
red	115	111	1	0.000101971	1	15	0.135135	0.6	25	GO:0007608	BP	sensory perception of smell	The series of events required for an organism to receive an olfactory stimulus	convert it to a molecular signal	and recognize and characterize the signal. Olfaction involves the detection of chemical composition of an organism's ambient medium by chemoreceptors. This is a neurological process.
red	115	111	2	0.000101971	1	15	0.135135	0.6	25	GO:0004984	MF	olfactory receptor activity	Combining with an odorant and transmitting the signal from one side of the membrane to the other to initiate a change in cell activity in response to detection of smell.
red	115	111	3	0.000341029	1	15	0.135135	0.555556	27	GO:0007606	BP	sensory perception of chemical stimulus	The series of events required for an organism to receive a sensory chemical stimulus	convert it to a molecular signal	and recognize and characterize the signal. This is a neurological process.
red	115	111	4	0.00827091	1	6	0.0540541	0.666667	9	GO:0042180	BP	cellular ketone metabolic process	The chemical reactions and pathways involving any of a class of organic compounds that contain the carbonyl group	CO	and in which the carbonyl group is bonded only to carbon atoms	as carried out by individual cells. The general formula for a ketone is RCOR	where R and R are alkyl or aryl groups.
red	115	111	5	0.00827091	1	6	0.0540541	0.666667	9	GO:0050907	BP	detection of chemical stimulus involved in sensory perception	The series of events in which a chemical stimulus is received and converted into a molecular signal as part of sensory perception.
red	115	111	6	0.0138814	1	4	0.036036	0.8	5	GO:0046928	BP	regulation of neurotransmitter secretion	Any process that modulates the frequency	rate or extent of the regulated release of a neurotransmitter from a cell.
red	115	111	7	0.0143169	1	3	0.027027	1	3	GO:0031056	BP	regulation of histone modification	Any process that modulates the frequency	rate or extent of the covalent alteration of a histone.
red	115	111	8	0.0143169	1	3	0.027027	1	3	GO:0035456	BP	response to interferon-beta	Any process that results in a change in state or activity of a cell or an organism (in terms of movement	secretion	enzyme production	gene expression	etc.) as a result of an interferon-beta stimulus. Interferon-beta is a type I interferon.
red	115	111	9	0.0143169	1	3	0.027027	1	3	GO:0035458	BP	cellular response to interferon-beta	Any process that results in a change in state or activity of a cell (in terms of movement	secretion	enzyme production	gene expression	etc.) as a result of an interferon-beta stimulus. Interferon-beta is a type I interferon.
red	115	111	10	0.0143169	1	3	0.027027	1	3	GO:0035695	BP	mitophagy by induced vacuole formation	The process in which cells degrade mitochondria by inducing a vacuole-like structure which directly engulfs and degrades the unhealthy mitochondria by accumulating lysosomes.
turquoise	160	155	1	0.000855041	1	16	0.103226	0.666667	24	GO:0031012	CC	extracellular matrix	A structure lying external to one or more cells	which provides structural support for cells or tissues; may be completely external to the cell (as in animals and bacteria) or be part of the cell (as in plants).
turquoise	160	155	2	0.00176074	1	10	0.0645161	0.769231	13	GO:0005740	CC	mitochondrial envelope	The double lipid bilayer enclosing the mitochondrion and separating its contents from the cell cytoplasm; includes the intermembrane space.
turquoise	160	155	3	0.00176074	1	10	0.0645161	0.769231	13	GO:0031966	CC	mitochondrial membrane	Either of the lipid bilayers that surround the mitochondrion and form the mitochondrial envelope.
turquoise	160	155	4	0.0048588	1	23	0.148387	0.534884	43	GO:0043005	CC	neuron projection	A prolongation or process extending from a nerve cell	e.g. an axon or dendrite.
turquoise	160	155	5	0.00612645	1	24	0.154839	0.521739	46	GO:0006508	BP	proteolysis	The hydrolysis of proteins into smaller polypeptides and/or amino acids by cleavage of their peptide bonds.
turquoise	160	155	6	0.00644923	1	26	0.167742	0.509804	51	GO:0097458	CC	neuron part	Any constituent part of a neuron	the basic cellular unit of nervous tissue. A typical neuron consists of a cell body (often called the soma)	an axon	and dendrites. Their purpose is to receive	conduct	and transmit impulses in the nervous system.
turquoise	160	155	7	0.00653271	1	14	0.0903226	0.608696	23	GO:0003013	BP	circulatory system process	A organ system process carried out by any of the organs or tissues of the circulatory system. The circulatory system is an organ system that moves extracellular fluids to and from tissue within a multicellular organism.
turquoise	160	155	8	0.00653271	1	14	0.0903226	0.608696	23	GO:0008015	BP	blood circulation	The flow of blood through the body of an animal	enabling the transport of nutrients to the tissues and the removal of waste products.
turquoise	160	155	9	0.00721941	1	45	0.290323	0.45	100	GO:0031988	CC	membrane-bounded vesicle	Any small	fluid-filled	spherical organelle enclosed by a lipid bilayer.
turquoise	160	155	10	0.00742823	1	6	0.0387097	0.857143	7	GO:0019866	CC	organelle inner membrane	The inner	i.e. lumen-facing	lipid bilayer of an organelle envelope; usually highly selective to most ions and metabolites.
