# Supplementary material for: Co-expression network analysis identified hub genes critical to triglyceride and free fatty acid metabolism as key regulators of age-related vascular dysfunction in mice
Source: Aging (Albany NY). 2019 Sep 12;11(18):7620–38. doi: 10.18632/aging.102275 (PMC6781998; doi:10.18632/aging.102275)
Supplement: Supplementary Table 6 [file aging-11-102275-s010.xlsx]

## Sheet: Sheet1
Supplementary Table 6. Promoter analysis of the 30 hub genes in the turgquoise module by iRegulon
# Rank	Motif ID	AUC	NES	Cluster Code	Transcription Factor	Target Genes
1	tfdimers-MD00244	0.144598	4.65278	M1	Nr3c1,Hsf1,Pgr,Ar,Churc1,Nr2f1,Nr2f2,Rfx1,Spz1,Maf,Hsf4,Hsf3,Nr3c2	Ass1,Nfasc,Adcy1,Fmod,Cpxm2
2	hdpi-PIK3C3	0.138921	4.42595	M2	Pik3c3	Ass1,Etv4,Fmod,Igfbp4,Slc22a18,Rasa4,Hic1
3	transfac_pro-M01242	0.1359	4.30525	M3	Mtf1	Etv4,Enpp5,Nfasc,F3
4	jaspar-CN0166.1	0.131837	4.14293	M4		Efemp1,Nfasc,Itih3,Kctd12,Cacna2d3,Fez1
5	taipale-YGTCTAGACA-SMAD3-DBD	0.13142	4.12628	M5	Smad3	F3,Ass1,Ngb,Kctd12,Fmod
6	yetfasco-554	0.130587	4.09298	M6		Ass1,Etv4,Cacna2d3,Nfasc,Adcy1,Fmod,Ahsg,Kctd12,Efemp1,Kif1a,Myoc,F3,Slc22a18,Igfbp4,Fez1,A230065H16Rik,Cpxm2
7	jaspar-MA0364.1	0.130378	4.08466	M7	Zfp622	Nfasc,Igfbp4,Slc22a18,Fmod,Ass1
8	yetfasco-489	0.130378	4.08466	M7	Zfp622	Nfasc,Igfbp4,Slc22a18,Fmod,Ass1
9	hdpi-SOD1	0.129857	4.06385	M2	Sod1	Ass1,Fmod,Etv4,Nfasc,Slc22a18,Gdf10,Adcy1,Igfbp4,Rasa4
10	hdpi-CHES1	0.128868	4.02431	M7	Foxn3	Slc22a18,Fmod,Cpxm2,Nfasc,Ass1,Etv4,Rasa4,Myoc,Adcy1,Igfbp4,Gdf10,Itih3,Ahsg,Kif1a,Kctd12,A230065H16Rik
11	transfac_pro-M00947	0.128295	4.00142	M8	Tfcp2,Tfcp2l1,Yy2	Fmod,Etv4,Ass1,Nfasc
12	transfac_public-M00193	0.12569	3.89737	M8	Nfic,Nfia,Nfib,Nfix,Nf1,Foxa3,Yy1,Nfatc1,Hoxa13,Elf1,Usf1,Tlx3,Tlx1,Crx,2310045N01Rik,Mef2a,Mef2b,Mef2c,Mef2d	Etv4,Igfbp4,Ass1,Nfasc
13	elemento-TCCTTGCC	0.125273	3.88072	M9		Ibsp,Gpnmb,Igfbp4,Cacna2d3,Ass1,Ngb,Etv4,Efemp1,Nfasc
14	transfac_pro-M01523	0.124909	3.86615	M6		Kctd12,Fmod,Cacna2d3,Nfasc
15	yetfasco-832	0.124909	3.86615	M6		Kctd12,Fmod,Cacna2d3,Nfasc
16	elemento-CCTCCAG	0.124753	3.85991	M10		Ass1,Slc22a18,Fmod,Nfasc,A230065H16Rik,Igfbp4,Adcy1,Rarres1,Myoc,Ahsg,Rasa4,Kctd12,Etv4,Cpxm2
17	stark-AWNTGGGTCA	0.1247	3.85783	M11	Rora,Rorc,Nr1d1,Ppara,Ppard,Nr1d2	Nfasc,Adcy1,Etv4,F3,Slc22a18,Enpp5
18	yetfasco-1697	0.122252	3.76002	M12	Kdm4d,Kdm4c,Kdm4b,Kdm4a	Etv4,Efemp1,Igfbp4,Nfasc,Ass1
19	encode-UW.Motif.0498	0.121158	3.71632	M6		Nfasc,Ass1,Etv4,Rasa4,Gdf10,Efemp1,Igfbp4
20	transfac_pro-M00806	0.120846	3.70383	M8	Nfia,Nfic,Nfix,Nfib,Nf1,Foxa3,Yy1,Hoxa13,Nfatc1,E2f1,Usf1,Tlx3,Tlx1	Ass1,Igfbp4,Nfasc,Etv4
21	yetfasco-885	0.12069	3.69759	M13		Etv4,Nfasc,Slc22a18,Ass1
22	encode-UW.Motif.0079	0.1197	3.65805	M14		Ass1,Fmod,Ahsg
23	hdpi-MGC10334	0.119075	3.63308	M15	Gltpd1	Ass1,Etv4,Nfasc,Fmod
24	swissregulon-PAX8.p2	0.11845	3.60811	M6	Pax8	Etv4,Kctd12,Fmod,F3,Nfasc,Adcy1,Efemp1,Gdf10
25	encode-UW.Motif.0508	0.118189	3.5977	M6		Igfbp4,Nfasc,Ass1,Etv4
26	jaspar-MA0092.1	0.117616	3.57481	M16	Hand1,Tcf3,Hand2,Nobox	Igfbp4,Rarres1,Efemp1,Myoc,Nfasc,Cacna2d3
27	flyfactorsurvey-tap_da_SANGER_5_2_FBgn0015550	0.117564	3.57273	M17	Neurog3,Neurog1,Neurog2	Igfbp4,Nfasc,Cacna2d3,Ass1,F3
28	hdpi-RAB7A	0.117304	3.56232	M18	Rab7	Etv4,Rasa4,Ass1,Fmod
29	jaspar-CN0065.1	0.116887	3.54568	M19	Pou3f1,Pou5f1,E2f1,Tcf3,Pax4,Hoxd1,Nanog,Yy1,Pbx1	Etv4,Fmod,Nfasc,Enpp5,Kctd12,F3,Fcer1a
30	yetfasco-1596	0.116783	3.54151	M12	Kdm4c,Kdm4a,Kdm4b,Kdm4d	Etv4,Igfbp4,Nfasc,Efemp1,Ass1,Kif1a
31	transfac_pro-M02086	0.116366	3.52487	M20	Cdx1	Etv4,Hic1,Nfasc,Igfbp4
32	yetfasco-1704	0.116262	3.5207	M12	Kdm4d,Kdm4c,Kdm4a,Kdm4b	Etv4,Igfbp4,Efemp1,Nfasc,Kif1a
33	yetfasco-2008	0.116054	3.51238	M12	Tgif2,Gm7148,Tgif1	Etv4,Efemp1,Igfbp4,Nfasc
34	yetfasco-1902	0.115689	3.49781	M12	Tgif2,Gm7148,Tgif1	Efemp1,Nfasc,Etv4,Igfbp4
35	encode-UW.Motif.0100	0.115429	3.48741	M1		Cpxm2,Nfasc,Etv4,Fmod
36	elemento-CGCACACA	0.114804	3.46243	M21		Etv4,Nfasc,Igfbp4,Efemp1,Ass1
37	elemento-CTCTCTC	0.114752	3.46035	M14		Ass1,Nfasc,Igfbp4
38	stark-GAGAGAG	0.114752	3.46035	M14		Ass1,Nfasc,Igfbp4
39	encode-UW.Motif.0028	0.113918	3.42706	M16		Nfasc,Ass1,Fmod,Kctd12,Cpxm2,Ngb,Etv4,Igfbp4,Adcy1
40	encode-UW.Motif.0215	0.113814	3.4229	M1		Ass1,Nfasc,Fmod,Kctd12
41	encode-UW.Motif.0356	0.113762	3.42081	M6		Ass1,Nfasc,Fmod,Igfbp4,Efemp1
42	yetfasco-918	0.11371	3.41873	M12		Nfasc,Igfbp4,Etv4,Kif1a,Efemp1
43	tfdimers-MD00221	0.113658	3.41665	M22	Gabpa,Foxo1	Igfbp4,Gdf10,Nfasc,Fcer1a
44	tfdimers-MD00080	0.113606	3.41457	M7	Mafa,Ovol2	Ass1,Nfasc,Efemp1,Cacna2d3
45	tfdimers-MD00599	0.112251	3.36047	M23	Rxra,Stat1,Nr2f1,Nr2f2	Skiv2l,Igfbp4,Nfasc,Ass1
46	encode-UW.Motif.0200	0.111835	3.34382	M24		Igfbp4,Ass1,Fmod,Nfasc
47	jaspar-MA0142.1	0.111626	3.33549	M19	Pou5f1,Sox2,Pou3f1,Nfatc1,Tcf3,Pax4,Yy1,Pdx1,Pbx1,Hoxd1,E2f1,Cdx2,Sox9	Kctd12,Nfasc,Etv4
48	tiffin-TIFDMEM0000024	0.111626	3.33549	M20		Hic1,Fmod,Etv4,Nfasc
49	encode-UW.Motif.0108	0.111418	3.32717	M8		A230065H16Rik,Ass1,Nfasc,Fmod,Etv4,Rasa4,Cacna2d3,Myoc,Igfbp4,Cpxm2,Adcy1
50	tfdimers-MD00488	0.11121	3.31884	M22	Hdx,Elf1	Hic1,Igfbp4
51	transfac_pro-M01648	0.111157	3.31676	M25		Ass1,Etv4,Cacna2d3,Gdf10
52	yetfasco-1997	0.111157	3.31676	M12		Etv4,Nfasc,Igfbp4,Efemp1
53	yetfasco-2037	0.110011	3.27098	M12	Tgif2,Gm7148,Tgif1	Efemp1,Nfasc,Etv4
54	transfac_pro-M02776	0.109907	3.26682	M6	Mafk,Mafb,Maf,Maff,Nrl,Dbp	Cacna2d3,F3,Nfasc,Adcy1,Kctd12
55	hdpi-UGP2	0.109647	3.25641	M10	Ugp2	Ass1,Fmod,Slc22a18,Etv4,Adcy1,Igfbp4,Nfasc,Cpxm2,A230065H16Rik,Myoc,Kctd12,Ahsg,Rarres1,Rasa4,Ngb,Efemp1,Gdf10
56	transfac_pro-M02087	0.109334	3.24393	M20	Cdx2	Hic1,Etv4,Igfbp4,Nfasc,F3,Rarres1,Gdf10,A230065H16Rik,Fmod
57	jaspar-PB0189.1	0.10923	3.23977	M8	Tfap2a,Tfap2c,Tfap2b	Fmod,Ass1,Etv4,Slc22a18,Igfbp4,Nfasc,Kif1a,Ahsg,Adcy1,Gpnmb,Rasa4,Rarres1,Myoc,A230065H16Rik
58	homer-M00656	0.109178	3.23768	M17	Twist2,Twist1	Cacna2d3,Nfasc,Rarres1
59	transfac_pro-M02367	0.109178	3.23768	M17	Twist2,Twist1	Cacna2d3,Nfasc,Rarres1
60	elemento-CACGCAC	0.108553	3.21271	M26		Etv4,Igfbp4,Nfasc,Efemp1
61	elemento-ATGCTGC	0.108345	3.20439	M4		Cacna2d3,Ahsg,Fmod,Nfasc
62	flyfactorsurvey-Met_Clk_SANGER_5_FBgn0023076	0.10798	3.18982	M17	Clock,Npas2,Hey1,Hey2,Heyl	Nfasc,Igfbp4,Ass1,Fmod
63	elemento-CATCATG	0.107876	3.18566	M27		Fmod,Nfasc,Kctd12,F3
64	homer-M00860	0.107511	3.17109	M12		Etv4,Slc22a18,Igfbp4,Ass1,A230065H16Rik
65	jaspar-CN0221.1	0.107303	3.16277	M10		Ass1,F3,Nfasc,Igfbp4,Cacna2d3,Adcy1,Fmod,Ahsg,Etv4,Myoc,Efemp1,Rasa4
66	hdpi-ZNF503	0.107042	3.15236	M28	Zfp503,Spr,Spr-ps1,Aff4	Ass1,Etv4,Igfbp4,Slc22a18
67	elemento-GCACACAC	0.10673	3.13988	M26		Etv4,Nfasc,Efemp1,Igfbp4,Ass1
68	encode-UW.Motif.0159	0.106678	3.1378	M24		Ass1,Nfasc,Igfbp4,Slc22a18,Fmod,Gpnmb,Etv4,Cacna2d3,Cpxm2,Kctd12,A230065H16Rik,Rarres1,Ahsg,Efemp1,Hic1,Gdf10,F3
69	elemento-TCCTCCA	0.106626	3.13572	M29		Ass1,Nfasc,Igfbp4,Ahsg,Slc22a18,Etv4,Rarres1,Rasa4,Kctd12,Fmod,Enpp5,Adcy1
70	elemento-CCACCTC	0.106574	3.13363	M28		Fmod,Ass1,Nfasc,Etv4,Rasa4,Slc22a18,Igfbp4,Cacna2d3
71	transfac_pro-M01624	0.106522	3.13155	M7	Zfp622	Igfbp4,Nfasc,Slc22a18,Fmod,Ass1,Rasa4
72	encode-UW.Motif.0555	0.106313	3.12323	M24		Ass1,Nfasc,Igfbp4,Slc22a18,Fmod,Gpnmb,Cacna2d3,Gdf10,Ahsg
73	elemento-ACGCACAC	0.106261	3.12115	M21		Etv4,Igfbp4,Nfasc,Efemp1
74	tfdimers-MD00205	0.106209	3.11907	M30	Gata2,Gata3,Gata4,Gata6,Gata1,Gata5	Hic1,Fmod,Efemp1
75	hdpi-PLG	0.105949	3.10866	M16	Plg,Sf3b1	Nfasc,Igfbp4,Ass1,Fmod
76	yetfasco-1804	0.105896	3.10658	M12	Mettl3	Igfbp4,Nfasc,Etv4
77	transfac_pro-M02864	0.105844	3.1045	M12	Zscan4f	Etv4,Igfbp4,Ass1,Nfasc
78	yetfasco-412	0.105844	3.1045	M31	Rfx2,Rfx3,Rfx1,Rfx4,Rfx6,Rfx8,Rfx5,Rfxank,Rfxap	Hic1,A230065H16Rik,Rasa4,Cpxm2
79	tfdimers-MD00038	0.105167	3.07745	M8	Tfap2c,Tfap2e,Tfap2a,Tfap2b,Pou2f1,Pura	Etv4,Ass1,Rasa4,Nfasc,Slc22a18
80	homer-M00119	0.105115	3.07537	M8	Nf1,Nfic,Nfia,Nfib,Nfix,Yy1,Tlx3,Tlx1,Nfatc1,E2f1,Foxa3	Igfbp4,Fmod,Ass1,Etv4
81	encode-UW.Motif.0117	0.104803	3.06288	M1		Ass1,Igfbp4,Nfasc,A230065H16Rik
82	homer-M00134	0.104594	3.05456	M19	Pou5f1,Sox2,Pou3f1,Nfatc1,Tcf3,Pax4,Yy1,Pbx1,Pdx1,Hoxd1,Cdx2,E2f1	Kctd12,Etv4,Nfasc
83	homer-M00242	0.104594	3.05456	M14		Nfasc,Fmod,Igfbp4,Ass1,Etv4
84	homer-M00118	0.103969	3.02958	M24	Nf1	Igfbp4,Hic1,Etv4,Nfasc,Myoc,Ass1
85	tfdimers-MD00487	0.103865	3.02542	M20	Hoxa13,Nr1h4,Nr1i2,Nr1i3,Pbx1	Efemp1,Kctd12,Hic1,Nfasc
86	homer-M00215	0.103657	3.0171	M13	Zfp711,Zfy2,Zfy1	Nfasc,Etv4,Ass1,Ngb,Slc22a18
87	swissregulon-YY1.p2	0.103552	3.01294	M31	Yy1	Ass1,A230065H16Rik,Nfasc
