# Supplementary material for: Co-expression network analysis identified hub genes critical to triglyceride and free fatty acid metabolism as key regulators of age-related vascular dysfunction in mice
Source: Aging (Albany NY). 2019 Sep 12;11(18):7620–38. doi: 10.18632/aging.102275 (PMC6781998; doi:10.18632/aging.102275)
Supplement: Supplementary Table 7 [file aging-11-102275-s004.xlsx]

## Sheet: Sheet1
Supplementary Table 7. Promoter analysis of the 30 hub genes in the blue module by iRegulon.
# Rank	Motif ID	AUC	NES	Cluster Code	Transcription Factor	Target Genes
1	factorbook-PU1	0.133233	7.83122	M1	Irf4,Sfpi1,E2f1,Myb,Ep300,E2f6,Tcf4	Cd68,Ptpro,Cybb,Csf1r,Fgd2,Atp1a3,Chn1,Fbxo32,Itgb7,Myo1f,Sorl1,Ly86
2	yetfasco-1691	0.116062	6.7278	M2		Sorl1,Sema5a,Fbxo32,Aox1,Fcgr1
3	taipale-TGACCTTTAAAGGTCA-NR4A2-full	0.0944612	5.33961	M3	Nr4a2	Ptgfrn,C1qa,Fgd2,Csf1r,Sema5a,Ptpro,Chn1
4	taipale-AACCGGWNNNWCCGGTT-GRHL1-DBD	0.0826788	4.58242	M4	Grhl1	Sorl1,2210020M01Rik,Chn1
5	transfac_pro-M00699	0.0821752	4.55006	M5	Irf8,Irf6,Irf7,Irf1,Irf4,Irf2,Irf3,Irf5,Stat1,Stat2,Myb,Zeb1,Sfpi1	Ly86,Fcgr1,Sema5a,Fgd2
6	tfdimers-MD00376	0.0814703	4.50476	M6	Hoxa13,Klf4	Cybb,Fcgr1,Ptpro,Myo1f,Cd48
7	transfac_pro-M00644	0.0812689	4.49182	M7		C1qa,Sardh,2210020M01Rik,Cyp3a13
8	tfdimers-MD00066	0.0802618	4.4271	M8	Runx2,Cbfb,Elf1,Ets1,Fli1,Ets2,Elf2,Elk1,Erg,Erf,Elk4,Bptf,Vdr,Gli3,Zbtb14,Elf5,Runx3,Gabpb2	Myo1f,Cybb,2010107G23Rik,Chn1,Fgd2
9	encode-UW.Motif.0306	0.0802115	4.42387	M9		Fbxo32,2210020M01Rik,Chn1
10	homer-M00051	0.079859	4.40121	M8	Runx1,Ing4,Zfp354c,Gli3,Zbtb14,Elf5	Cybb,2010107G23Rik,Fgd2
11	jaspar-CN0044.1	0.079859	4.40121	M10		Cybb,Sema5a
12	encode-UW.Motif.0640	0.079708	4.39151	M11		2210020M01Rik,Chn1,Fbxo32
13	transfac_public-M00281	0.0796072	4.38504	M12	Rfx1,Rfx3,Rfx2,Rfxank,Rfx5,Rfxap,Rfx6,Rfx8	Atp1a3,Chn1,Sema5a
14	jaspar-MA0137.1	0.0792548	4.36238	M5	Irf8,Irf7,Irf5,Irf4,Irf6,Irf1,Irf3,Irf2,Stat1,Stat2,Myb,Sfpi1	Cybb,BC013712,Ly86
15	yetfasco-1904	0.0781974	4.29443	M13		Fbxo32,Sorl1,Cd48
16	taipale-NNMCCATATAWGGKNN-SRF-full	0.076435	4.18118	M14	Srf	Ptgfrn,Cybb,Cd48,2010107G23Rik,Chn1,Ptpro
17	tfdimers-MD00336	0.0763343	4.1747	M5	Stat1,Irf8,Prdm1,Irf6,Irf7,Irf5,Irf2,Irf3,Irf1,Irf4,Pura	Fcgr1,Cybb,Fbxo32,BC013712,Myo1f
18	yetfasco-1717	0.0755791	4.12617	M15		Ptpro,Cd48,Chn1,Sorl1,Fbxo32,Ptgfrn
19	encode-UW.Motif.0542	0.0749748	4.08734	M16		Fbxo32,C1qa,2210020M01Rik
20	tfdimers-MD00138	0.0748238	4.07763	M5	Irf6,Irf2,Irf4,Myb,Irf5,Irf7,Irf8,Irf9,Irf1,Irf3,E2f1,Zeb1,Pou5f1	H2-Q7,Ptpro,Sema5a,Ms4a4b
21	yetfasco-1799	0.0748238	4.07763	M17		Ly86,Chn1,Sorl1
22	transfac_public-M00199	0.073716	4.00644	M18	Fos,Junb,Fosb,Jund,Fosl1,Jun,Nfe2,Batf,Sfpi1,Arnt	Ptpro,Cd68,Fbxo32
23	encode-UW.Motif.0095	0.0735146	3.9935	M10	Mycs,Yy1	Fbxo32,Chn1,Sema5a
24	transfac_pro-M02749	0.0733635	3.98379	M10	Foxa2,Foxj3,Foxk1,Foxl1,Foxa3,Foxa1,Foxj1,Foxf2,Foxo3,Foxj2,Foxc1,Foxd1,Foxo4,Foxo1,Foxc2,Hltf,Nr3c1,Pgr,Smad1,Pdx1,Foxp1,Jun,Fos,Foxo6,Foxd2,Sox10,Cebpa,Cebpe,Cebpg,Cebpb,Foxb1,Cdx2,Pou5f1,3110039M20Rik,Foxs1,Foxi3,Foxi2	Sorl1,Chn1,Fbxo32
25	taipale-RNCATATGNY-Atoh1-DBD	0.0733132	3.98055	M19	Neurog2,Neurod2,Olig3,Olig2,Bhlhe23,Olig1,Bhlhe22,Bhlha15,Neurog1,Neurog3,Zfp146,Zfp260	Ptpro,2010107G23Rik,Fbxo32
26	transfac_public-M00392	0.0731621	3.97085	M14	Srf,Mef2a,2310045N01Rik,Mef2b,Mef2c,Mef2d	Ptgfrn,Sema5a,2010107G23Rik
27	elemento-AAGGTGA	0.0730111	3.96114	M20		Ptgfrn,Sorl1
28	tfdimers-MD00470	0.0726586	3.93849	M4	Trp53,Trp63,Trp73,Myb	Fbxo32,2210020M01Rik,Chn1,Cybb
29	yetfasco-1478	0.0720544	3.89966	M12	Rfx2,Rfx3,Rfx4,Rfx1,Rfx6,Rfx8,Rfx5,Rfxank,Rfxap	Atp1a3,Chn1
30	jaspar-CN0033.1	0.072004	3.89642	M10		Sema5a,Cybb
31	homer-M00159	0.0718026	3.88348	M1	Irf4,Sfpi1,Gabpb1,Pura	Cd68,Myo1f,Fgd2,Cybb,Atp1a3,Ptpro,Fbxo32,Itgb7,2010107G23Rik,Sema5a,Sorl1,Chn1,Ly86
32	transfac_pro-M01581	0.0718026	3.88348	M14		Chn1,2010107G23Rik,Csf1r,Sema5a
33	flyfactorsurvey-lola-PJ_SANGER_5_FBgn0005630	0.0713494	3.85435	M21		Chn1,Serpinb13,Ptgfrn
34	homer-M01470	0.071148	3.84141	M18		Fbxo32,Sema5a,Sorl1,C1qa,Myo1f,Ptpro,Cybb,Ptgfrn,Chn1,Cd48
35	transfac_public-M00258	0.0710977	3.83818	M5	Irf8,Irf6,Irf4,Irf5,Irf3,Irf1,Irf2,Irf7,Irf9,Prdm1,Stat1,Stat2,Myb,Sfpi1,Pura,E2f1	Ly86,BC013712,Cybb,Fcgr1,Fgd2
36	elemento-CAGCTTC	0.070997	3.8317	M7		Sorl1,Cyp3a13
37	swissregulon-LEF1_TCF7_TCF7L1-2.p2	0.0708459	3.822	M22	Lef1,Tcf7l1,Tcf7l2,Tcf7,Tcf4,Tcf3	Ptpro,Ly86,Ptgfrn,Chn1
38	jaspar-CN0126.1	0.0704935	3.79935	M23		Fbxo32,Ptgfrn,Csf1r,Chn1,Sorl1,Sema5a,Ptpro,Cd48,Ly86,C1qa
39	taipale-RACATATGTY-NEUROG2-full	0.070292	3.7864	M19	Neurog2,Neurod2,Bhlhe23,Olig3,Bhlhe22,Olig2,Olig1	2010107G23Rik,Fbxo32,Ptpro,Cybb,Chn1,Wrb
40	elemento-CTTATCAG	0.0696375	3.74434	M24	Gata5,Gata3,Gata2,Gata4,Gata6	C1qa,Fbxo32,2210020M01Rik
41	taipale-NRTTACRTAAYN-TEF-DBD	0.0695368	3.73786	M25	Tef,Nfil3,Atf2,Hlf,Hoxa13	Chn1,Fgd2,Cyp3a13
42	homer-M00079	0.0693353	3.72492	M26	Gli3,Gli1,Glis1,Gli2	2210020M01Rik,Ly86,Sorl1,Fbxo32
43	wolfe-her_SOLEXA_F2-4	0.0693353	3.72492	M27	Zfat,Zfp827	Ptgfrn,Atp1a3,Ptpro,2210020M01Rik,Itgb7
44	yetfasco-1371	0.0693353	3.72492	M28		Atp1a3,Fbxo32,Ptgfrn,Ptpro
45	jaspar-CN0219.1	0.0691843	3.71521	M12	Rfx2,Rfx6,Rfx3,Rfx4,Rfx8,Rfx5	Ptpro,Chn1
46	hdpi-ADARB1	0.0689325	3.69903	M29	Adarb1	Sema5a,Cybb,Ptpro
47	hdpi-IVD	0.0689325	3.69903	M30	Ivd	C1qa,Chn1,Sema5a,Ptgfrn
48	yetfasco-1363	0.0689325	3.69903	M18	Jdp2,Nfe2,Fosl1,Bach2,Junb,Jund,Fos,Fosb,Jun,Fosl2,Bach1,Batf,Sfpi1,Arnt	Ptpro,Fbxo32,C1qa,Sema5a,Sorl1,Ly86,Chn1,Cd68,Cybb,2010107G23Rik,Csf1r
49	transfac_public-M00467	0.0688318	3.69256	M20	Zfp423	Fbxo32,2010107G23Rik
50	factorbook-STAT2	0.0687311	3.68609	M5	Stat1,Stat2,Irf8,Irf7,Irf1,Irf2,Irf3,Irf4,Irf6,Irf5,Irf9,Prdm1,Zeb1	Cybb,Ly86,BC013712,Fgd2,Fcgr1
51	encode-UW.Motif.0534	0.0686808	3.68285	M31		Ptpro,Ptgfrn,Ly86,C1qa,Csf1r,Fbxo32,Fcgr1,Fgd2,Sema5a,Sorl1
52	yetfasco-1372	0.0686304	3.67962	M11		Ptpro,Atp1a3,Ptgfrn
53	taipale-TATGCAAAT-Pou2f2-DBD	0.0682276	3.65373	M32	Pou2f2,Pou2f3,Pou2f1,Pou3f4,Pou2af1,Pou3f1,Pou5f1,Pou4f1,Pou3f2,Pou3f3,Pax4,Pou1f1,Yy1,Pbx1	C1qa,Sorl1,Fbxo32
54	jaspar-PB0058.1	0.0681772	3.6505	M1	Sfpi1,Spib,Spic,Ehf,Elf3,Elk1,Ets1,Gabpb1,Elf5,Gata2,Gata3,Gata4,Gata6,Gata1,Gata5,Myb,Pura,Mzf1,Ltf	Myo1f,Cd68,Cybb
55	taipale-RTAAAYA-Foxc1-DBD	0.0679758	3.63755	M10	Foxj2,Foxc2,Foxo6,Foxm1,Foxd2	Fbxo32,Sorl1,Ptpro
56	encode-UW.Motif.0541	0.0676234	3.6149	M33		2210020M01Rik,C1qa,Chn1
57	transfac_pro-M03815	0.0673212	3.59549	M18	Fos,Jun,Fosl1,Jund,Junb,Fosb,Fosl2	Fbxo32,Ptpro,Cd68
58	yetfasco-917	0.0669184	3.5696	M21		Ly86,Chn1,Sorl1
59	taipale-NGTTRCCATGGYAACN-RFX2-DBD	0.0668177	3.56313	M12	Rfx2,Rfx1,Rfx5,Rfx8,Rfx6,Rfxank,Rfxap	Atp1a3,Chn1
60	yetfasco-1729	0.066717	3.55666	M28		Itgb7,Ptgfrn,C1qa,Chn1
61	tfdimers-MD00561	0.066566	3.54695	M34	Crx,Ap3b1	Cd48,Chn1,Sema5a
62	transfac_pro-M02270	0.0664653	3.54048	M10	Foxo3,Foxg1,3110039M20Rik	Fbxo32,Ptpro,Cybb,Sorl1,Chn1,Sema5a
63	transfac_pro-M01009	0.0661128	3.51783	M11	Hes1,Hes2	Ptpro,Atp1a3,Cd48,Chn1
64	yetfasco-2053	0.0661128	3.51783	M35		Chn1,Ptpro,Sorl1
65	encode-UW.Motif.0289	0.0660624	3.51459	M31		2210020M01Rik,Sardh,Sorl1,2010107G23Rik,Sema5a,Chn1
66	yetfasco-706	0.0660624	3.51459	M18		Sorl1,C1qa,Fbxo32,Cybb,Sema5a,Chn1
67	flyfactorsurvey-CG11071_SOLEXA_FBgn0030532	0.0659617	3.50812	M11		Ptpro,Cd48,Ptgfrn
68	yetfasco-664	0.0659617	3.50812	M29	Thoc2,BC005561	Cybb,Sorl1,Chn1
69	encode-UW.Motif.0058	0.0657603	3.49517	M36		Sardh,Cyp3a13,2210020M01Rik,2010107G23Rik,Sorl1,Ptgfrn
70	encode-UW.Motif.0440	0.0651057	3.45311	M36		Fbxo32,2210020M01Rik,C1qa
71	encode-UW.Motif.0246	0.0649043	3.44016	M36		2210020M01Rik,Sardh,Ptgfrn,Sema5a,Fgd2,Fbxo32,Sorl1,C1qa,2010107G23Rik,Chn1
72	homer-M00855	0.0647533	3.43046	M37		Chn1,Ms4a4b,Cd48,Cybb,Ly86,Ptpro,Sorl1,2210020M01Rik
73	taipale-NGTTNCCATGGNAACN-Rfx3-DBD	0.0646526	3.42399	M12	Rfx1,Rfx5,Rfx2,Rfx3,Rfx6,Rfx8,Rfxank,Rfxap	Atp1a3,Chn1
74	jaspar-CN0039.1	0.0646022	3.42075	M12	Rfx3,Rfx4,Rfx2,Rfxank,Rfxap,Rfx5	Atp1a3,Chn1
75	jaspar-PF0037.1	0.0645519	3.41751	M12	Rfx1,Rfx2,Rfx6,Rfx8,Rfx5,Rfxank,Rfxap	Atp1a3,Chn1
76	tfdimers-MD00058	0.0645519	3.41751	M11	Smad3,Yy1	Sorl1,Atp1a3,Chn1,Fbxo32,C1qa,Cybb,Sema5a,Fgd2
77	yetfasco-1324	0.0644512	3.41104	M12	Rfx2,Rfx3,Rfx6,Rfx1,Rfx4,Rfx8,Rfx5,Rfxank,Rfxap	Atp1a3,Chn1
78	taipale-NRTTACGTAAYN-Dbp-DBD	0.0641994	3.39486	M25	Nfil3,Atf2,Hlf,Tef	Chn1,Fgd2,Cyp3a13
79	jaspar-CN0162.1	0.064149	3.39163	M38		Chn1,Sema5a,Cd48,2210020M01Rik,Cybb,Ptpro,Sorl1
80	taipale-SGTTRCCATRGCAACS-RFX5-DBD	0.064149	3.39163	M12	Rfx5,Rfx1,Rfx2,Rfxank,Rfxap,Rfx6,Rfx8	Atp1a3,Chn1
81	taipale-NGTTRCCATGGYAACN-RFX5-DBD	0.063998	3.38192	M12	Rfx5,Rfx1,Rfx2,Rfx6,Rfx8,Rfxank,Rfxap	Atp1a3,Chn1
82	tfdimers-MD00268	0.063998	3.38192	M39	Pitx3,Pparg	2210020M01Rik,Chn1
83	jaspar-PF0043.1	0.0639476	3.37868	M12	Rfx1,Rfx5,Rfx3,Rfx2,Rfx6,Rfx8,Rfxank,Rfxap	Atp1a3,Chn1
84	taipale-AACAATRTKCAGWGTT-SOX10-full	0.0639476	3.37868	M40	Sox10,Sox9,Sox8,Sox21,Sox7	Cd48,Chn1,Ptgfrn
85	taipale-ATCAATNNCATTGAT-SOX18-full	0.0638973	3.37545	M40	Sox18,Sox2,Sox10,Sox8,Sox9,Sox15,Sox14,Sox21	2010107G23Rik,Ptpro,Sorl1
86	tfdimers-MD00468	0.0636455	3.35927	M11	Runx2,Cbfb,Wt1	Fbxo32,Sorl1,Chn1,Ptpro,2210020M01Rik
87	homer-M01773	0.0634441	3.34632	M12	Rfx1,Rfx2,Rfx3,Rfx8,Rfx6,Rfx5,Rfxank,Rfxap	Atp1a3,Chn1
88	hdpi-PKNOX2	0.0632931	3.33662	M41	Pknox2	2210020M01Rik,Chn1,Sardh
89	yetfasco-1438	0.0632931	3.33662	M14	Srf	Sema5a,Cd48,Chn1
90	encode-UW.Motif.0395	0.063142	3.32691	M36		Ptgfrn,Sorl1,Chn1
91	yetfasco-1194	0.0630413	3.32044	M42		Ms4a4b,Fbxo32,Myo1f,Chn1,Ptgfrn,Fcgr1,Ptpro
92	transfac_pro-M03162	0.0629909	3.3172	M43		Sorl1,Ptgfrn,Fbxo32
93	taipale-NGTTRCCATGGYAACN-Rfx2-DBD	0.0629406	3.31397	M12	Rfx1,Rfx3,Rfx2,Rfx5,Rfx6,Rfx8,Rfxank,Rfxap	Atp1a3,Chn1
94	taipale-NGTTNCCATGGNAACN-RFX3-DBD	0.0628902	3.31073	M12	Rfx3,Rfx1,Rfx2,Rfx5,Rfxank,Rfxap,Rfx6,Rfx8	Atp1a3,Chn1
95	homer-M00882	0.0627895	3.30426	M17		Sema5a,Ptpro,Cd48,Cybb
96	yetfasco-678	0.0625378	3.28808	M12	Rfx2,Rfx3,Rfx4,Rfx1,Rfx6,Rfx8,Rfx5,Rfxank,Rfxap	Atp1a3,Chn1
97	yetfasco-932	0.0624874	3.28484	M14	2310045N01Rik,Mef2b,Mef2c,Mef2a,Mef2d	2010107G23Rik,Myo1f
98	encode-UW.Motif.0664	0.0624371	3.28161	M43		Sardh,2210020M01Rik,Ptgfrn,Chn1,2010107G23Rik,Itgb7,Sema5a,Ly86,Serpinb13,Sorl1,Fbxo32,C1qa
99	flyfactorsurvey-CG7928_SOLEXA_5_FBgn0039740	0.0623867	3.27837	M36		Ptgfrn,Fgd2,Fbxo32
100	transfac_pro-M00978	0.0623364	3.27514	M22	Tcf7,Lef1,Tcf7l2,Tcf7l1,Tcf3,Tcf4	Ptpro,Ly86
101	hdpi-PSMC2	0.0621853	3.26543	M22	Psmc2	Chn1,Sorl1,Ptgfrn
102	jaspar-PF0087.1	0.0621349	3.26219	M12	Rfx1,Rfx2,Rfxank,Rfxap,Rfx5,Rfx6,Rfx8	Atp1a3,Chn1
103	homer-M00353	0.0620846	3.25896	M11	Snai2,Snai1,Snai3,Tcf3,Myog,Myod1,Myf6,Id4	Cd48,Fbxo32
104	homer-M00164	0.0619839	3.25249	M12	Rfx3,Rfx1,Rfx5,Rfx2,Rfxank,Rfxap,Rfx6,Rfx8	Atp1a3,Chn1
105	homer-M01520	0.0619839	3.25249	M12	Rfx1,Rfx2,Rfx3,Rfx8,Rfx6,Rfx5,Rfxank,Rfxap	Atp1a3,Chn1,Itgb7,Ptpro,Ly86,Sema5a
106	jaspar-PB0017.1	0.0619839	3.25249	M10	Foxj3,Foxa2,Foxk1,Foxl1,Foxf2,Foxj1,Foxa1,Foxa3,Foxj2,Foxo4,Foxc1,Foxo1,Foxo3,Foxd1,Foxp3,Foxc2,3110039M20Rik,Nr3c1,Pgr,Hltf,Smad1,Pdx1,Foxd2,Foxp1,Sf1	Sorl1,Fbxo32
107	jaspar-CN0010.1	0.0619335	3.24925	M12	Rfx1,Rfx2,Rfxank,Rfxap,Rfx5,Rfx6,Rfx8,Nfatc1	Atp1a3,Chn1
108	encode-UW.Motif.0526	0.0618832	3.24601	M31		Fbxo32,Fgd2,Ptpro
109	homer-M01484	0.0617825	3.23954	M18	Nfe2,Jun,Fos,Fosb,Jund,Fosl1,Junb,Jdp2,Batf,Sfpi1	Fbxo32,Ptpro,C1qa,Sorl1,Sema5a
110	tfdimers-MD00513	0.0617321	3.23631	M11	E2f1,Pax4	Chn1,Sema5a
111	wolfe-herF1-ZifF1_herF34_SOLEXA_5	0.0617321	3.23631	M27	Zfat,Zfp827	Ptgfrn,Itgb7
112	homer-M01809	0.0616314	3.22983	M29	Thoc2,BC005561	Cybb,Sorl1,Fbxo32,Chn1
113	homer-M00163	0.0615811	3.2266	M12	Rfx1,Rfx2,Rfx6,Rfx8,Rfx5,Rfxank,Rfxap	Atp1a3,Chn1
114	jaspar-CN0143.1	0.0615811	3.2266	M30		Ptgfrn,Sorl1,Cd48,Ptpro,Chn1
115	yetfasco-412	0.0615811	3.2266	M12	Rfx2,Rfx3,Rfx1,Rfx4,Rfx6,Rfx8,Rfx5,Rfxank,Rfxap	Atp1a3,Chn1,Itgb7,Ptpro,Sema5a,Ly86,Fbxo32
116	taipale-NANCATATGNTN-BHLHE22-DBD	0.0615307	3.22336	M19	Bhlhe22,Olig1,Olig2,Bhlhe23,Olig3,Neurog2,Neurod2,Bhlha15	2010107G23Rik,Ptpro,Chn1
117	taipale-RRGGTCATGACCYY-RXRG-DBD	0.0613293	3.21042	M44	Rxrg,Rxra	Sema5a,H2-Q7
118	encode-UW.Motif.0307	0.0612286	3.20395	M28		Ptgfrn,Chn1,2210020M01Rik
119	tfdimers-MD00267	0.0612286	3.20395	M45	E2f1,Mzf1,Nfkb1,Rela	Ptgfrn,Ly86
120	jaspar-CN0077.1	0.0611782	3.20071	M46		Sorl1,Cybb
121	yetfasco-1629	0.0611279	3.19748	M18	Jund,Fosl1,Junb,Jun,Fosb,Fos,Jdp2,Bach1,Fosl2,Bach2,Batf,Sfpi1,Srf,Arnt,Irf8	Ptpro,Sema5a,Fbxo32,C1qa
122	taipale-NGTTNCCATGGNAACN-RFX4-DBD	0.0610272	3.191	M12	Rfx4,Rfx1,Rfx3,Rfx2,Rfx5,Rfx6,Rfx8,Rfxank,Rfxap	Atp1a3,Chn1,Itgb7,Sema5a
123	taipale-RTAAAYA-FOXD2-DBD	0.0609768	3.18777	M10	Foxd2,Foxj3,Foxl1,Foxj1,Foxa2,Foxk1,Foxa3,Foxa1,Foxf2,Foxo3,Foxp3,Foxc2,Hltf,3110039M20Rik,Foxo6,Foxq1,Foxl2,Foxb1,Srf	Fbxo32,Sorl1
124	tfdimers-MD00510	0.0607754	3.17482	M25	Hoxa13	Chn1,Fgd2,Ptpro
125	transfac_public-M00010	0.0607251	3.17159	M47		Sorl1,Ptgfrn,Sema5a,Fbxo32,Ly86,Chn1,Mx1,2010107G23Rik
126	yetfasco-1557	0.0606244	3.16512	M12	Rfx2,Rfx3,Rfx1,Rfx6,Rfx4,Rfx8,Rfx5,Rfxank,Rfxap	Atp1a3,Chn1
127	swissregulon-RFX1..5_RFXANK_RFXAP.p2	0.060423	3.15217	M12	Rfx3,Rfx4,Rfx1,Rfx2,Rfxank,Rfx5,Rfxap,Rfx6,Rfx8	Atp1a3,Chn1
128	taipale-NRTTACGTAAYN-DBP-DBD	0.060423	3.15217	M25	Dbp,Nfil3,Atf2,Hlf,Tef	Chn1,Cyp3a13,Fgd2
129	tfdimers-MD00412	0.0603726	3.14894	M9	Nr3c1,E2f6	Cd48,Chn1,Fbxo32
130	transfac_pro-M03551	0.0603726	3.14894	M18	Junb,Fos,Jund,Fosl2,Fosb,Jun,Fosl1,Batf,Sfpi1	Ptpro,Fbxo32
131	homer-M00210	0.0603223	3.1457	M12	Rfx1,Rfx2,Rfx6,Rfx8,Rfx5,Rfxank,Rfxap	Atp1a3,Chn1
132	encode-UW.Motif.0519	0.0602215	3.13923	M16		Sorl1,Ptpro
133	yetfasco-2204	0.0602215	3.13923	M10	Foxj1,Foxf2,Foxo1,Foxj3,Foxk1,Foxl1,Foxa2,Foxo3,Foxa1,Foxa3,Foxp3,Foxc2,Foxd2,3110039M20Rik,Hltf,Foxo6,Foxb1,Foxm1,Foxp1,Tfap4,Foxq1,Foxl2,Sox10	Fbxo32,Sorl1,Ptpro
134	yetfasco-468	0.0602215	3.13923	M12	Rfx2,Rfx3,Rfx1,Rfx6,Rfx4,Rfx8,Rfx5,Rfxank,Rfxap	Atp1a3,Chn1,Ms4a4b,Itgb7,Ly86,Fbxo32,Ptgfrn,Ptpro,Sema5a,Sorl1,Cd48
135	jaspar-PF0094.1	0.0599194	3.11981	M13		Chn1,Sorl1,Fbxo32
136	transfac_public-M00060	0.0598691	3.11658	M11	Snai2,Snai1,Snai3,Tcf3,Myod1,Myog,Myf6,Id4	Cd48,Fbxo32
137	transfac_public-M00002	0.0597684	3.11011	M11	Tcf3,Myf6,Nr3c1,Tcf21,Msc,Tcf23,Snai3	Fbxo32,C1qa,2210020M01Rik
138	transfac_pro-M03538	0.0596677	3.10364	M18	Fosl1,Fos,Fosl2,Jun,Junb,Jund,Fosb,Batf,Sfpi1,Irf8,Arnt	Ptpro,Fbxo32,Cd68
139	elemento-CCTGCAG	0.059567	3.09716	M48		Cyp3a13,C1qa,2210020M01Rik,Sorl1,Atp1a3,Chn1
140	transfac_pro-M02233	0.0595166	3.09393	M46		Chn1,Sorl1
141	taipale-AACAATRTKCAGWGTT-SOX9-full	0.0593152	3.08098	M40	Sox9,Sox8,Sox10,Sox21,Sox7	Chn1,Cd48
142	tfdimers-MD00118	0.0593152	3.08098	M6	Ep300,Nobox,Hoxa5,Hoxb6,Hoxa6,Hoxc8,Lhx2,Hoxb3	C1qa,Sorl1
143	transfac_pro-M01059	0.0592145	3.07451	M14	Srf,Mef2b,2310045N01Rik,Mef2c,Mef2a,Mef2d	Ptgfrn,2010107G23Rik
144	homer-M00002	0.0590634	3.06481	M18	Jun,Batf,Fosl2,Junb,Fos,Fosl1,Sfpi1,Jund,Jdp2,Fosb,Bach1,Bach2,Nfe2,Nfe2l2,Maf,Nfe2l1,Nfe2l3,Mafk,Mafg,Maff,Mafb,Arnt,Srf,Nfatc1	Ptpro,Fbxo32,Sema5a,Cd68,Chn1,Csf1r,C1qa
145	taipale-RGGTCATGACCY-Rxra-DBD	0.0590634	3.06481	M44	Rxra,Rxrg	H2-Q7,Sema5a
146	homer-M00158	0.0589627	3.05833	M5	Irf4,Sfpi1,Prdm1,E2f1,Ep300,Zeb1,Myb	Fcgr1,Ly86,Ptpro,Cybb,Csf1r
147	encode-UW.Motif.0079	0.0589124	3.0551	M48		2210020M01Rik,C1qa
148	taipale-AGGTCANNNNNTGACCT-NR4A2-full	0.058862	3.05186	M33	Nr4a2	Sorl1,Ptgfrn,Chn1,Wrb
149	transfac_pro-M01368	0.0587613	3.04539	M32	Pou2f2,Pou2f3,Pou2f1,Pou5f1,Pou3f2,Pou3f4,Pou3f1,Pou2af1,Pou4f1,Pou3f3,Pax4,Yy1,Pou1f1,Crx	C1qa,Sorl1
150	homer-M00160	0.058711	3.04215	M49	Rarg,Nr6a1	Ptgfrn,Fbxo32,C1qa
151	jaspar-MA0083.1	0.0585096	3.02921	M14	Srf	Ptpro,Ptgfrn,2010107G23Rik
152	jaspar-CN0188.1	0.0584089	3.02274	M50		2010107G23Rik,Ptpro
153	tfdimers-MD00597	0.0584089	3.02274	M34	Nkx2-1,Arid3a	Fbxo32,Chn1
154	taipale-NTATGCWAATN-POU2F2-DBD	0.0583082	3.01627	M32	Pou2f2,Pou2f1,Pou2f3,Pou5f1,Pou3f2,Pou3f4,Pou2af1,Pou4f1,Pou3f1,Pou3f3,Pou1f1,Pax4,Yy1,Pbx1,E2f1	C1qa,Sorl1,Fbxo32
155	transfac_pro-M00950	0.0583082	3.01627	M14	Srf	Ptgfrn,2010107G23Rik
156	transfac_pro-M00925	0.0581571	3.00656	M18	Jund,Jun,Fosl1,Fosb,Junb,Fos,Fosl2,Irf8,Isl1,Batf,Sfpi1,Arnt	Ptpro,Fbxo32,Chn1,Cd68,Sema5a,2010107G23Rik,Cybb,C1qa,Ly86,Ptgfrn
157	hdpi-FAM127B	0.0581067	3.00332	M12	Cxx1a,Cxx1b,Cxx1c	2210020M01Rik,Chn1
