# Supplementary material for: Co-expression network analysis identified hub genes critical to triglyceride and free fatty acid metabolism as key regulators of age-related vascular dysfunction in mice
Source: Aging (Albany NY). 2019 Sep 12;11(18):7620–38. doi: 10.18632/aging.102275 (PMC6781998; doi:10.18632/aging.102275)
Supplement: Supplementary Table 8 [file aging-11-102275-s009.xlsx]

## Sheet: Sheet1
Supplementary Table 8. Promoter analysis of the 30 hub genes in the red module by iRegulon.
# Rank	Motif ID	AUC	NES	Cluster Code	Transcription Factor	Target Genes
1	encode-UW.Motif.0038	0.111418	5.78575	M1		Cacna1a,4930583H14Rik,Jarid2,Gap43
2	homer-M00419	0.108032	5.58871	M1	Zfp513	4930583H14Rik,Cacna1a,Jarid2,Gfra3,Gap43
3	homer-M00567	0.104334	5.37349	M1	Zfp513	4930583H14Rik,Cacna1a,Jarid2,Gfra3
4	homer-M00341	0.103657	5.33408	M2	Tcf7,Lef1,Tcf7l2,Tcf7l1,Tcf4	Jarid2,Cacna1a,4930583H14Rik,Gap43
5	flyfactorsurvey-CG2052_SOLEXA_2.5_FBgn0039905	0.102198	5.24921	M1	Tfap2e,Srf,Zfp362,Zfp384	Cacna1a,4930583H14Rik,Jarid2,Gfra3,Gap43
6	transfac_pro-M02916	0.101625	5.21586	M1	Srf,Elf3,Zfp362,Zfp384	4930583H14Rik,Cacna1a,Jarid2,Vax1,Gap43,Gfra3
7	transfac_public-M00362	0.101469	5.20677	M2	Tcf7,Lef1,Tcf7l2,Tcf7l1,Tcf4	Jarid2,Cacna1a,4930583H14Rik,Gap43
8	homer-M00683	0.100688	5.1613	M1	Zfp513	Cacna1a,4930583H14Rik,Jarid2
9	yetfasco-2063	0.0995416	5.09461	M3	Neurod1	Grin1,Gap43,Cacna1a,Vax1
10	transfac_pro-M01826	0.0990207	5.0643	M4	Pitx1	Vax1,Gap43,Mid2,Dsc1,Adamts7,Kcnh8,Cyp11a1,Jarid2,Gfra3,Olfr686,Pilra
11	yetfasco-1131	0.0969893	4.94608	M5		Clca4,Cyp11a1,Cacna1a,Olfr1298,4930583H14Rik,Klrb1c,Dner,Sva,Jarid2,Gap43,Chek2
12	yetfasco-960	0.0969893	4.94608	M5		Clca4,Cyp11a1,Cacna1a,Olfr1298,4930583H14Rik,Klrb1c,Dner,Sva,Jarid2,Gap43,Chek2
13	wolfe-Sqz_SOLEXA_F1-3	0.0959996	4.88848	M1	Zfp362,Zfp513	4930583H14Rik,Jarid2,Cacna1a
14	homer-M00385	0.0958433	4.87939	M1	Zfp513	4930583H14Rik,Cacna1a,Jarid2
15	transfac_public-M00022	0.0943327	4.79148	M1	Zfp513	4930583H14Rik,Cacna1a,Jarid2
16	elemento-AGCGCGC	0.0941765	4.78238	M5		Gap43,Grin1,Ephb1,Fbxo16
17	iDMMPMM-HB	0.093916	4.76723	M1	Zfp513,Zfp362,Zfp384	4930583H14Rik,Cacna1a,Jarid2
18	yetfasco-985	0.0931347	4.72176	M6	Nfya,Nfyb,Nfyc,Pole3,Gm21827	Vax1,Chek2,Ephb1
19	jaspar-PF0072.1	0.0930826	4.71873	M7	Hsf1,Hsf4,Hsf3	Jarid2,Adamts7,Ephb1,Mid2,Kcnh8
20	encode-UW.Motif.0114	0.0927701	4.70054	M8		Grin1,Vax1,Jarid2,Adamts7
21	wolfe-rn_SOLEXA_F2-4	0.0918846	4.64901	M1	Zfp362,Zfp384,Zfp513	4930583H14Rik,Jarid2,Cacna1a,Gfra3
22	yetfasco-2117	0.0917283	4.63991	M3	Mybl2,Myb,Mybl1,Snapc4,Srf,Tbp,Tbpl2,Tbpl1,Mef2a,2310045N01Rik,Mef2b,Mef2c,Mef2d,Jazf1,Kdm4c,Kdm4a,Kdm4b,Kdm4d,Zim1,Zfp384,Zfp362,Gata2,Gata3,Gata4,Gata6,Elk1,Gata1,Gata5,Tcf3,Pax1,Pax9	Cacna1a,Vax1,Gap43
23	homer-M00627	0.09152	4.62779	M1	Zfp513	Cacna1a,4930583H14Rik,Jarid2,Gap43,Gfra3
24	flyfactorsurvey-sqz_SOLEXA_5_FBgn0010768	0.0913116	4.61566	M1	Zfp362,Zfp384,Srf,Zfp513	Jarid2,4930583H14Rik,Cacna1a,Gfra3
25	jaspar-PF0129.1	0.0913116	4.61566	M9		Jarid2,Chek2,Vax1,Mid2,4930583H14Rik,Cyp11a1,Adamts7,Gap43
26	stark-BMGYBGYYGYNGMVBV	0.0910512	4.60051	M10		Jarid2,Gap43,Grin1
27	flyfactorsurvey-sqz_SANGER_5_FBgn0010768	0.0908428	4.58838	M1	Zfp362,Zfp384	Cacna1a,Jarid2,Gfra3,4930583H14Rik
28	taipale-NAASATCAAAGN-TCF7L1-full	0.0906865	4.57929	M2	Tcf7l1,Lef1,Tcf7l2,Tcf7,Tcf4	Cacna1a,Gap43,4930583H14Rik
29	transfac_pro-M01800	0.0895406	4.5126	M11		Cacna1a,Gap43,Jarid2,4930583H14Rik
30	flyfactorsurvey-jim_F1-9_SOLEXA_2.5_FBgn0027339	0.0886551	4.46107	M1	Zfp362,Zfp384	4930583H14Rik,Cacna1a,Jarid2,Gfra3
31	encode-UW.Motif.0299	0.0877696	4.40953	M3		Ephb1,Dner,Gap43
32	encode-UW.Motif.0554	0.0875091	4.39438	M3		Jarid2,Gap43,4930578C19Rik
33	yetfasco-2228	0.0874049	4.38831	M3	Kdm4d,Kdm4c,Kdm4b,Kdm4a,Mef2a,Mef2b,2310045N01Rik,Mef2c,Mef2d,Mybl2,Mybl1,Myb,Snapc4,Pax1,Pax9	Cacna1a,Gap43,Vax1
34	transfac_public-M00190	0.0867278	4.34891	M8	Cebpa,Cebpb,Cebpe,Cebpd,Cebpg,Mafb,Nr3c1	Vax1,Jarid2,Gap43
35	yetfasco-1664	0.0856339	4.28525	M12		Grin1,Adamts7,Chek2
36	encode-UW.Motif.0017	0.0854256	4.27312	M8		Cacna1a,Gap43,Vax1
37	transfac_pro-M01873	0.0852693	4.26403	M12	Egr1,Egr2,Egr4,Egr3,Wt1	Cacna1a,Jarid2,Kcnh8,Adamts7
38	transfac_pro-M01014	0.0850089	4.24887	M13	Sox6,Sox13,Sox9,Sox8,Sox2,Sox18,Sox11,Sox5,Sry,Sox10,Sox15,Sox4,Sox21,Sox14,Sox12,Sox3,Qsox1	Jarid2,Vax1,Kcnh8
39	yetfasco-2119	0.0845921	4.22462	M3	Pax4,Srf,Tbp,Tbpl2,Tbpl1,Jazf1,Zim1,Gata2,Gata3,Gata4,Gata6,Gata1,Elk1,Gata5,Mef2a,2310045N01Rik,Mef2b,Mef2c,Mef2d,Nf1,Foxa3,Mybl1,Mybl2,Snapc4,Myb,Zfp384,Zfp362,Nr2f2,Nr2f1,Tcf3,Pax1,Pax9	Vax1,Cacna1a,Gap43
40	yetfasco-2166	0.084488	4.21856	M3	Srf,Jazf1,Tbp,Tbpl2,Tbpl1,2310045N01Rik,Mef2b,Mef2a,Mef2c,Mef2d,Gata2,Gata3,Gata4,Gata6,Elk1,Gata1,Gata5,Mybl2,Myb,Mybl1,Snapc4,Zim1,Smad4,Mycs,Pou3f2,Pou3f3,Pou3f1,Pou3f4,Nf1,Foxa3	Vax1,Cacna1a,Gap43
41	transfac_pro-M01105	0.0839671	4.18825	M14		Gap43,Ephb1,Dsc1
42	jaspar-CN0100.1	0.0833941	4.1549	M15		Fbxo16,Clca4,Vax1
43	yetfasco-2213	0.0830816	4.13672	M3	Srf,Pax4,Stat1,Tbp,Tbpl2,Tbpl1,Jazf1,Mef2b,Mef2a,2310045N01Rik,Mef2c,Mef2d,Zim1,Gata2,Gata3,Gata4,Gata6,Elk1,Gata1,Gata5,Nf1,Foxa3,Mybl1,Mybl2,Snapc4,Myb,Nr2f2,Nr2f1,Zfp384,Zfp362,Tcf3,Pax1,Pax9,E2f1,Yy1	Vax1,Cacna1a,Gap43
44	homer-M01858	0.0830295	4.13368	M3	Nfya,Pole4,Hoxc8,Hoxb8,Hoxd8	Ephb1,Vax1,Chek2
45	yetfasco-2231	0.0825607	4.1064	M3	Tcf7l1,Srf,Tbp,Tbpl2,Tbpl1,Jazf1,Zim1,Gata2,Gata4,Gata6,Elk1,Gata1,Gata5,Mef2a,Mef2c,Mef2d,2310045N01Rik,Mef2b,Mybl2,Mybl1,Snapc4,Myb,Nr2f2,Nr2f1,Nf1,Foxa3,Zfp384,Zfp362	Vax1,Cacna1a,Gap43
46	flyfactorsurvey-jim_SANGER_2.5_FBgn0027339	0.0824565	4.10034	M1		Cacna1a,4930583H14Rik,Jarid2
47	yetfasco-2185	0.0823523	4.09428	M3		Vax1,Jarid2,Cacna1a
48	taipale-NAAGATCAAAGG-Tcf7-DBD	0.0821961	4.08518	M2	Lef1,Tcf7l2,Tcf7,Tcf7l1,Tcf4,Tcf3	Gap43,Cacna1a,4930583H14Rik
49	yetfasco-2172	0.0821961	4.08518	M3	Tbp,Tbpl2,Tbpl1,Pax4,Stat1,Srf,Zim1,Mef2b,Mef2a,2310045N01Rik,Mef2c,Mef2d,Jazf1,Mybl1,Mybl2,Snapc4,Myb,Gata2,Gata3,Gata4,Gata6,Elk1,Gata1,Gata5,Nf1,Foxa3,Zfp384,Zfp362,Nr2f2,Nr2f1,Pax1,Pax9,Tcf3	Vax1,Cacna1a,Gap43
50	hdpi-HIST2H2BE	0.082144	4.08215	M16		Gap43,Vax1,Cacna1a
51	transfac_pro-M01866	0.0818314	4.06396	M8	Cebpa,Cebpd,Cebpb,Cebpe,Cebpg,Nr3c1,Sox9,Stat6	Vax1,Cacna1a,Gap43
52	stark-CCTTTGATCTT	0.0812585	4.03062	M2	Tcf7,Lef1,Tcf7l2,Tcf7l1,Tcf4	Jarid2,Cacna1a,4930583H14Rik,Gap43
53	homer-M00829	0.0811543	4.02456	M17		Vax1,Jarid2,Adamts7,Mid2,Gap43
54	yetfasco-1805	0.0808418	4.00637	M18	Mitf	Gap43,Grin1,Ephb1
55	yetfasco-2244	0.0808418	4.00637	M3	Tcf7l1,Pax4,Jazf1,Srf,Zim1,Tbp,Tbpl2,Tbpl1,Gata2,Gata3,Gata4,Gata6,Elk1,Gata1,Gata5,Mef2a,2310045N01Rik,Mef2b,Mef2c,Mef2d,Zfp384,Zfp362,Mybl2,Mybl1,Snapc4,Myb,Nr2f2,Nr2f1,Nf1,Foxa3,Tcf3	Vax1,Cacna1a,Gap43
56	transfac_pro-M02434	0.0806855	3.99728	M3	Nfya,Pole4,Hoxc8,Hoxb8,Hoxd8	Vax1,Chek2,Ephb1
57	yetfasco-695	0.0805292	3.98818	M3	Pole4,Hoxc8,Hoxb8,Hoxd8	Vax1,Ephb1,Chek2
58	jaspar-MA0378.1	0.0802167	3.96999	M11	Jazf1	Vax1,Gap43,Cacna1a,Pilra,Ephb1,4930583H14Rik
59	homer-M00538	0.0801646	3.96696	M1	Zfp513,Zfp362,Zfp384	Jarid2,4930583H14Rik,Cacna1a,Gfra3,Adamts7,Gap43,Vax1
60	yetfasco-270	0.0801646	3.96696	M11		Jarid2,Vax1
61	factorbook-EGR1	0.0796958	3.93968	M12	Egr1,Egr3,Egr4,Egr2,Sp4,Sp2,Sp3,Sp1,Wt1,Zbtb14,Rreb1	Cacna1a,Kcnh8,Gap43
62	transfac_pro-M01528	0.0796437	3.93665	M11	Jazf1	Vax1,Gap43,Cacna1a,Pilra,4930583H14Rik,Ephb1
63	yetfasco-797	0.0796437	3.93665	M11	Jazf1	Vax1,Gap43,Cacna1a,Pilra,4930583H14Rik,Ephb1
64	homer-M01755	0.0794354	3.92452	M19		Jarid2,Klrb1c,Clca4
65	yetfasco-2167	0.0789145	3.89421	M3	Pax4,Jazf1,Srf,Gata2,Gata3,Gata4,Gata6,Gata1,Elk1,Gata5,Zim1,Tbp,Tbpl2,Tbpl1,Mef2b,Mef2a,2310045N01Rik,Mef2c,Mef2d,Mybl2,Mybl1,Snapc4,Myb,Zfp384,Zfp362,Nf1,Foxa3,Nr2f2,Nr2f1,Kdm4c,Kdm4a,Kdm4b,Kdm4d,Tcf3,Pax1,Pax9	Cacna1a,Vax1,Gap43
66	encode-UW.Motif.0400	0.0786019	3.87602	M3		Jarid2,4930583H14Rik
67	transfac_pro-M01010	0.0785498	3.87299	M11	Hmga2,Hmga1,Hmga1-rs1,Tfap2c,Nfatc1	Cacna1a,Vax1,Jarid2,Gap43
68	transfac_pro-M02926	0.0784978	3.86996	M1	Tfap2e	Cacna1a,Jarid2,4930583H14Rik,Vax1,Gap43,Dner
69	yetfasco-2175	0.0784457	3.86693	M3	Jazf1,Srf,Zim1,Tbpl2,Tbpl1,Mef2a,Mef2b,2310045N01Rik,Mef2c,Mef2d,Gata2,Gata3,Gata4,Gata6,Gata1,Elk1,Gata5,Mybl1,Mybl2,Snapc4,Myb,Zfp384,Zfp362,Nr2f2,Nr2f1,Nf1,Foxa3,Kdm4c,Kdm4a,Kdm4b,Kdm4d,Tcf3,Runx2,Cbfb	Vax1,Cacna1a,Gap43
70	flyfactorsurvey-CG2052_SANGER_2.5_FBgn0039905	0.0783936	3.8639	M1		4930583H14Rik,Cacna1a,Jarid2,Gfra3,Gap43
71	transfac_pro-M02827	0.0783415	3.86087	M1	Zfp105	4930583H14Rik,Cacna1a,Jarid2,Vax1,Gfra3,Adamts7,Gap43
72	homer-M00420	0.0781331	3.84874	M1	Rorc,Rorb,Rora	Jarid2,Cacna1a,4930583H14Rik,Gfra3,Gap43,Pilra,Vax1
73	yetfasco-2208	0.078029	3.84268	M3	Pax4,Srf,Tbp,Tbpl2,Tbpl1,Zim1,Jazf1,Gata2,Gata3,Gata4,Gata6,Gata1,Elk1,Gata5,Zfp384,Zfp362,Nf1,Foxa3,2310045N01Rik,Mef2a,Mef2b,Mef2c,Mef2d,Mybl1,Mybl2,Snapc4,Myb,Nr2f2,Nr2f1,Tcf3	Vax1,Cacna1a
74	yetfasco-2219	0.078029	3.84268	M3	Pax4,Tbp,Tbpl2,Tbpl1,Srf,Zim1,Jazf1,Mef2b,Mef2a,2310045N01Rik,Mef2c,Mef2d,Zfp384,Zfp362,Gata2,Gata3,Gata4,Gata6,Gata1,Elk1,Gata5,Nf1,Foxa3,Pax1,Pax9,Mybl1,Mybl2,Snapc4,Myb,Nr2f2,Nr2f1,Tcf3	Vax1,Cacna1a,Gap43
75	hdpi-ECSIT	0.0779248	3.83662	M20	Ecsit	Gap43,Vax1,Dsc1
76	yetfasco-672	0.0778206	3.83055	M19		Clca4,Jarid2,Klrb1c
77	transfac_public-M00461	0.0777164	3.82449	M21	Ovol1,Ovol2	Gap43,Grin1,Kcnh8
78	yetfasco-2129	0.0775602	3.8154	M3	Pax4,Srf,Tbp,Tbpl2,Tbpl1,Jazf1,Zim1,Zfp384,Zfp362,2310045N01Rik,Mef2b,Mef2a,Mef2c,Mef2d,Nf1,Foxa3,Gata2,Gata3,Gata4,Gata6,Gata1,Elk1,Gata5,Mybl2,Mybl1,Snapc4,Myb,Nr2f2,Nr2f1,Tcf3,Pax1,Pax9	Vax1,Cacna1a
79	yetfasco-2235	0.077456	3.80933	M3	Kdm4c,Kdm4b,Kdm4a,Kdm4d	Vax1,Jarid2,Cacna1a
80	jaspar-PF0080.1	0.0772997	3.80024	M22	Zfp143	Jarid2,Chek2,Zfp454,Kcnh8,Vax1,Cacna1a,Fbxo16,Cyp11a1
81	yetfasco-2152	0.0767267	3.7669	M3	Pax4,Tcf7l1,Jazf1,Srf,Zim1,Tbpl2,Tbpl1,Gata2,Gata3,Gata4,Gata6,Gata1,Elk1,Gata5,Nr2f2,Nr2f1,Mef2a,2310045N01Rik,Mef2b,Mef2c,Mef2d,Zfp384,Zfp362,Nf1,Foxa3,Mybl1,Mybl2,Snapc4,Myb,Runx2,Cbfb,Tcf3,Tfap4	Vax1,Cacna1a,Gap43
82	yetfasco-2114	0.0762059	3.73658	M3	Pax4,Tbp,Tbpl2,Tbpl1,Srf,Jazf1,Zfp384,Zfp362,Zim1,Gata2,Gata3,Gata4,Gata6,Gata1,Elk1,Gata5,Mef2b,2310045N01Rik,Mef2a,Mef2c,Mef2d,Pax1,Pax9,Nf1,Foxa3,Mybl1,Mybl2,Snapc4,Myb,Nr2f2,Nr2f1,Tfap4	Vax1,Cacna1a,Gap43
83	yetfasco-994	0.0759454	3.72143	M7	Hsf1,Hsf2,Hsf4,Hsf3	Cacna1a,Jarid2,Vax1,Kcnh8,Mid2,Adamts7,Ephb1
84	yetfasco-2176	0.0755287	3.69718	M3		Vax1,Jarid2,Cacna1a
85	transfac_pro-M00328	0.0753724	3.68808	M3	Pax8,Pax2	Vax1,Gap43,Cacna1a
86	flyfactorsurvey-hb_NAR_FBgn0001180	0.0751641	3.67596	M1	Zfp513,Zfp362,Zfp384	4930583H14Rik,Jarid2,Cacna1a,Pilra,Gfra3,Gap43
87	tfdimers-MD00255	0.0747474	3.65171	M17	Pitx3,Pax7,Lhx2,Hoxb3,Pax4,Hoxd1,Prrx2,Alx3,Lbx2,Lhx4,Msx3,Otx2,Prrxl1,Isl1	Vax1,Gap43,Jarid2
88	transfac_pro-M02850	0.0746953	3.64867	M1	Elf3,Srf,Tcf7l1,Zfp362,Zfp384	Vax1,Cacna1a,Gfra3,Jarid2,4930583H14Rik,Gap43
89	hdpi-TFAP2A	0.074539	3.63958	M23	Tfap2a	Mid2,Vax1,Jarid2,Grin1,Cacna1a,Gap43,Ephb1,Fbxo16
90	yetfasco-2215	0.0740181	3.60927	M3	Jazf1,Tbp,Tbpl2,Tbpl1,Pax1,Pax9,Srf,Mybl2,Mybl1,Myb,Snapc4,Mef2a,2310045N01Rik,Mef2b,Mef2c,Mef2d,Zfp384,Zfp362,Zim1,Nf1,Foxa3,Gata2,Gata3,Gata4,Gata6,Gata1,Elk1,Gata5	Vax1,Cacna1a,Gap43
91	transfac_pro-M00999	0.0738619	3.60017	M17	Aire	4930583H14Rik,Vax1,Cyp11a1,Adamts7,Olfr686,Fbxo16,Krtap16-5,4930578C19Rik,Jarid2,Dner
92	yetfasco-1593	0.0735493	3.58199	M6	Nfya,Nfyb,Nfyc	Vax1,Chek2
93	swissregulon-AIRE.p2	0.0723513	3.51227	M17	Aire	Vax1,Kcnh8,Jarid2,Cacna1a,Gap43,Adamts7,Krtap16-5
94	transfac_pro-M02362	0.0720388	3.49408	M8		Cacna1a,Vax1,Jarid2,Krtap16-5,Gap43
95	yetfasco-2189	0.0720388	3.49408	M3	Jazf1	Vax1,Cacna1a,Gap43,Jarid2
96	encode-UW.Motif.0340	0.0718825	3.48498	M8		Vax1,Cacna1a,Cyp11a1,Dsc1,Jarid2,Kcnh8,Gap43,4930578C19Rik
97	factorbook-REST	0.0717783	3.47892	M24	Rest	Kcnh8,Grin1,Dner,Gap43,Jarid2,Pilra,Mid2,Ephb1,Adamts7,Dsc1,Zfp454
98	transfac_pro-M02835	0.0714137	3.4577	M25	Zic1,Zic3,Zic2	Kcnh8,Grin1,Cacna1a
99	flyfactorsurvey-exd_FlyReg_FBgn0000611	0.0712053	3.44558	M1	Pbx3,Pbx1,Pbx2,Pbx4	Jarid2,Cacna1a,Vax1
100	homer-M00617	0.0712053	3.44558	M1	Pbx3,Pbx2,Pbx1,Pbx4	Jarid2,Cacna1a,Vax1
101	jaspar-PF0108.1	0.0708407	3.42436	M26		Chek2,Jarid2
102	yetfasco-1924	0.0708407	3.42436	M3		Jarid2,Gap43,Mid2,Adamts7,Ephb1
103	transfac_public-M00256	0.0707886	3.42133	M24	Rest	Grin1,Kcnh8,Dner
104	yetfasco-2199	0.0706844	3.41526	M3	Tcf7l1,Jazf1,Zim1,Srf,Tbpl2,Tbpl1,Gata2,Gata3,Gata4,Gata6,Elk1,Gata1,Gata5,Zfp384,Zfp362,Mef2b,2310045N01Rik,Mef2a,Mef2c,Mef2d,Nr2f2,Nr2f1,Nf1,Foxa3,Mybl2,Mybl1,Snapc4,Myb,Tfap4	Cacna1a,Vax1,Gap43
105	homer-M00267	0.0705803	3.4092	M1	Rfx2,Rfx3,Rfx4,Rfx6,Rfx8,Rfx1,Mybl2,Myb,Mybl1,Snapc4	4930583H14Rik,Cacna1a,Jarid2,Gfra3,Gap43,Vax1
106	yetfasco-2163	0.0704761	3.40314	M3	Jazf1,Srf,Zim1,Tbp,Tbpl2,Tbpl1,Gata2,Gata3,Gata4,Gata6,Elk1,Gata1,Gata5,2310045N01Rik,Mef2b,Mef2a,Mef2c,Mef2d,Nr2f2,Nr2f1,Zfp384,Zfp362,Nf1,Foxa3,Mybl2,Myb,Mybl1,Snapc4,Tfap4,Runx2,Cbfb,Pax1,Pax9,Smad4	Vax1,Cacna1a,Gap43
107	homer-M00422	0.0701636	3.38495	M10		Jarid2,Cacna1a,Gap43
108	homer-M00216	0.0699031	3.36979	M1	Srf,Mef2a,Mef2b,2310045N01Rik,Mef2c,Mef2d	4930583H14Rik,Cacna1a,Jarid2,Gap43,Gfra3,Fbxo16,Vax1
109	transfac_pro-M02836	0.0694343	3.34251	M25	Zic2,Zic3,Zic1,Zfp423	Kcnh8,Grin1,Cacna1a
110	jaspar-PF0113.1	0.0689655	3.31523	M26	Zfp143	Jarid2,Zfp454,Chek2
111	swissregulon-REST.p3	0.0687051	3.30007	M24	Rest	Kcnh8,Grin1,Dner
112	swissregulon-TBX4-5.p2	0.068653	3.29704	M27	Tbx5,Tbx4,Tbx2,Tbx20	Zfp454,Ephb1,Gap43
113	homer-M00078	0.0684967	3.28795	M26	Zfp143	Jarid2,Chek2,Zfp454
114	hdpi-ZBTB12	0.0683405	3.27886	M16	Zbtb12,Dhx36	Vax1,Cacna1a,Gap43
115	jaspar-CN0009.1	0.0678717	3.25157	M24	Rest	Kcnh8,Grin1,Dner
116	jaspar-PF0105.1	0.0677675	3.24551	M9		Jarid2,Chek2,Adamts7,Dsc1,Dner,Olfr686,Vax1
117	yetfasco-2179	0.0677675	3.24551	M3		Cacna1a,Vax1,Gap43
118	flyfactorsurvey-BH2_Cell_FBgn0004854	0.0676112	3.23642	M17	Barhl1,Barhl2,Hesx1,Tlx3,Tlx1,Isl1,Gbx2	Jarid2,Vax1,Dsc1
119	jaspar-PF0152.1	0.0675591	3.23339	M22		Jarid2,Chek2
120	yetfasco-1908	0.0675591	3.23339	M8		Gap43,Jarid2
121	homer-M00270	0.0674549	3.22732	M28	Tbp	Jarid2,Dsc1,Cacna1a,Kcnh8,Mid2
122	homer-M01492	0.0674549	3.22732	M6		Vax1,Chek2,Fbxo16,Ephb1
123	hdpi-SSBP3	0.0674029	3.22429	M16	Ssbp3	Vax1,Gap43,Mid2
124	taipale-NCGACCACCNAN-ZBTB7C-full	0.0672466	3.2152	M12	Zbtb7c,Gm18856,Zbtb7a	Vax1,Jarid2
125	yetfasco-2017	0.0669341	3.19701	M21		4930583H14Rik,Cacna1a
126	stark-VSGYYGCMGYCGYYGMMKKYG	0.0666736	3.18185	M10		Jarid2,Cacna1a
127	homer-M00446	0.0665173	3.17276	M17	Barhl2,Prrx2,Barhl1,Tlx3,Tlx1,Hesx1,Isl1	Jarid2,Vax1,Dsc1
128	homer-M01812	0.0664132	3.1667	M29		Jarid2,Ephb1,Kcnh8,Pilra,Cacna1a,4930583H14Rik,Klrb1c,Dner,Sva,Gap43,Chek2
129	transfac_pro-M02882	0.0662048	3.15457	M1	Mtf1	Cacna1a,Jarid2,4930583H14Rik,Vax1,Gap43
130	transfac_pro-M02837	0.0661006	3.14851	M25	Zic3,Zic2,Zic1,Zfp423	Kcnh8,Cacna1a,Grin1
131	jaspar-MA0138.2	0.0660485	3.14548	M24	Rest	Kcnh8,Grin1,Dner
132	transfac_pro-M01176	0.0659965	3.14245	M11		Vax1,Jarid2
133	yetfasco-1816	0.0658402	3.13335	M25	Srf	Jarid2,Cacna1a,Kcnh8
134	yetfasco-1233	0.065736	3.12729	M30		Jarid2,Vax1
135	transfac_pro-M01671	0.0656839	3.12426	M18		Gap43,Grin1
136	hdpi-NNT	0.0654756	3.11213	M31	Nnt	Cacna1a,4930583H14Rik,Jarid2,Gap43
137	yetfasco-2145	0.0653193	3.10304	M3	Pax4,Nfe2l1,Jazf1,Srf,Zim1,Zfp384,Zfp362,Tbp,Tbpl2,Tbpl1,Gata2,Gata3,Gata4,Gata6,Elk1,Gata1,Gata5,2310045N01Rik,Mef2a,Mef2b,Mef2c,Mef2d,Nf1,Foxa3,Nr2f2,Nr2f1,Mybl2,Mybl1,Myb,Snapc4,Pax1,Pax9,Tfap4,Runx2,Cbfb,Smad4	Cacna1a,Vax1,Gap43
138	yetfasco-713	0.0653193	3.10304	M18		Gap43,Grin1
139	elemento-CGGCGGC	0.065163	3.09395	M32		Jarid2,Cacna1a
140	jaspar-MA0321.1	0.065111	3.09091	M18		Gap43,Grin1
141	transfac_pro-M03856	0.065111	3.09091	M27	Tbx5	Cacna1a,Vax1,Ephb1,Gfra3,Olfr686,Gap43,Adamts7,Jarid2
142	transfac_public-M00171	0.065111	3.09091	M10		Jarid2,Cacna1a
143	tfdimers-MD00558	0.0649547	3.08182	M1	Pou5f1,Bptf,Zfp362,Zfp384,Rfx2,Rfx3,Rfx4,Rfx8,Rfx6,Rfx1	4930583H14Rik,Cacna1a,Jarid2,Gfra3
144	transfac_pro-M03855	0.0649547	3.08182	M27	Tbx5	Cacna1a,Ephb1,Gfra3
145	yetfasco-1806	0.0649026	3.07879	M18	Arnt	Grin1,Gap43
146	homer-M00161	0.0648505	3.07576	M24	Rest	Kcnh8,Grin1,Dner
147	jaspar-CN0121.1	0.0647463	3.06969	M33		Gap43,Cacna1a
148	tfdimers-MD00051	0.0647463	3.06969	M34	Gabpa,Stat6	Jarid2,Gap43
149	yetfasco-616	0.0647463	3.06969	M29		Jarid2,Ephb1,Kcnh8,Pilra,Cacna1a,4930583H14Rik,Klrb1c,Dner,Sva,Gap43,Chek2
150	tfdimers-MD00398	0.0645901	3.0606	M34	Pura,Ets1,Sfpi1,Spib,Elf2,Erg,Ets2,Elk4,Erf,Elf1,Elk1,Fli1,Etv4,Stat1,Nr3c1,E2f6,Gata2,Gata3,Gata4,Gata6,Gata1,Gata5,Tcf4,Tbp,E2f1	Jarid2,Gap43
151	yetfasco-2139	0.0645901	3.0606	M3	Srf	Jarid2,Vax1,Cacna1a
152	transfac_pro-M01220	0.064538	3.05757	M23		Vax1,Gap43
153	tfdimers-MD00587	0.0644859	3.05454	M35	Runx2,Cbfb,E2f1	Gap43,Vax1
154	hdpi-ODC1	0.0643296	3.04544	M31	Odc1	Cacna1a,Jarid2
155	tfdimers-MD00245	0.0642254	3.03938	M34	Gata2,Gata3,Gabpa,Gata4,Gata6,Gata1,Gata5,Sfpi1	Adamts7,Zp1,Gfra3
156	homer-M00883	0.0641733	3.03635	M35		Gap43,Vax1
157	yetfasco-1495	0.0640692	3.03029	M18	Mitf	Gap43,Grin1
158	yetfasco-30	0.0640171	3.02726	M36	Prdm2,Zfp683,Prdm1	Jarid2,Cacna1a,Ephb1,Dsc1,Kcnh8
159	tfdimers-MD00363	0.0639129	3.02119	M37	Meis1,Nfatc1,Cebpg,Ikzf2,Mzf1,Zfp354c	Jarid2,Mid2,Gap43
160	transfac_pro-M01685	0.0639129	3.02119	M10		Jarid2,Cacna1a
161	yetfasco-2229	0.0638608	3.01816	M3	Stat1,Pax4,Srf,Tbpl2,Tbpl1,Jazf1,Mef2a,2310045N01Rik,Mef2b,Mef2c,Mef2d,Gata2,Gata4,Gata6,Elk1,Gata1,Gata5,Mybl1,Mybl2,Snapc4,Myb,Zim1,Nr2f2,Nr2f1,Zfp384,Zfp362,E2f4,E2f6,Nf1,Foxa3,Kdm4c,Kdm4b,Kdm4a,Kdm4d,Tcf3,Pou3f2,Pou3f3,Pou3f1,Pou3f4	Cacna1a,Gap43,Vax1
162	transfac_pro-M02899	0.0636004	3.00301	M17	Sox11,Sox18,Sox4	Vax1,Gap43
