# Supplementary material for: Co-expression network analysis identified hub genes critical to triglyceride and free fatty acid metabolism as key regulators of age-related vascular dysfunction in mice
Source: Aging (Albany NY). 2019 Sep 12;11(18):7620–38. doi: 10.18632/aging.102275 (PMC6781998; doi:10.18632/aging.102275)
Supplement: Supplementary Table 9 [file aging-11-102275-s001.xlsx]

## Sheet: Sheet1
Supplementary Table 9. Promoter analysis of the 90 hub genes in the turquoise, blue and red modules.
# Rank	Motif ID	AUC	NES	Cluster Code	Transcription Factor	Target Genes
1	flyfactorsurvey-CG7928_SOLEXA_5_FBgn0039740	0.0680102	4.54797	M1		Jarid2,Etv4,Ptgfrn,Fgd2,Fmod,Nfasc,Kif1a,Ephb1,Fbxo32,Cacna2d3,Slc22a18,Kctd12,Cpxm2,Chn1,Gap43,Adamts7,Ass1,2010107G23Rik,C1qa,4930583H14Rik,Atp1a3
2	transfac_pro-M00328	0.0672892	4.48356	M2	Pax8,Pax2	Etv4,Chn1,Vax1,Kctd12,Gap43,Cacna1a,Efemp1,Fmod,Adcy1
3	elemento-AAGGTGA	0.0669802	4.45595	M3		Kctd12,Ptgfrn,Ass1,Sorl1,4930583H14Rik,Nfasc
4	encode-UW.Motif.0079	0.0633583	4.13237	M4		Ass1,Fmod,Ahsg,2210020M01Rik,C1qa,Nfasc,Adamts7,Etv4,Chn1
5	jaspar-PF0072.1	0.0623283	4.04036	M5	Hsf1,Hsf4,Hsf3	Fmod,Nfasc,Jarid2,Adamts7,Ephb1,Slc22a18,Sema5a,Mid2,Kcnh8,Hic1,Ass1
6	homer-M00134	0.0609379	3.91614	M6	Pou5f1,Sox2,Pou3f1,Nfatc1,Tcf3,Pax4,Yy1,Pbx1,Pdx1,Hoxd1,Cdx2,E2f1	Kctd12,Etv4,Nfasc,Sorl1,Gap43,Jarid2,Chn1,Fmod
7	transfac_pro-M02776	0.0606804	3.89314	M2	Mafk,Mafb,Maf,Maff,Nrl,Dbp	Csf1r,Cacna2d3,F3,Ephb1,Nfasc,Adcy1,Kctd12,Ptpro
8	elemento-CTCTCTC	0.060217	3.85173	M4		Ass1,Nfasc,Igfbp4,Gap43,Fmod,Mid2,Chn1,Atp1a3
9	stark-GAGAGAG	0.060217	3.85173	M4		Ass1,Nfasc,Igfbp4,Gap43,Fmod,Mid2,Chn1,Atp1a3
10	jaspar-CN0166.1	0.0596848	3.80419	M7		Efemp1,Sema5a,Nfasc,Itih3,Kctd12,Cacna2d3,Fez1,Ptgfrn,Jarid2
11	transfac_public-M00461	0.0594102	3.77965	M8	Ovol1,Ovol2	Gap43,Fmod,Grin1,Nfasc,Ass1,Chn1,Kcnh8
12	tfdimers-MD00502	0.0579854	3.65237	M6	Pbx1,Sox9,Smad1	Vax1,Ptpro,Etv4,Gdf10,Cacna2d3,2010107G23Rik,Kctd12,Itgb7,Cacna1a,Nfasc,Chn1,Mid2,Fgd2,Cybb,Slc22a18,Cpxm2,Jarid2,Kcnh8,Adamts7,Fbxo32,Gpnmb,Dsc1,Sorl1,4930578C19Rik,Gap43,Cd48
13	encode-UW.Motif.0053	0.0576421	3.6217	M4		Nfasc,Igfbp4,Gap43,Atp1a3,Ass1,Fmod,Mid2,Chn1
14	swissregulon-LEF1_TCF7_TCF7L1-2.p2	0.0572817	3.58949	M9	Lef1,Tcf7l1,Tcf7l2,Tcf7,Tcf4,Tcf3	Kcnh8,Ptpro,Ly86,Slc22a18,Efemp1,Ass1,Ptgfrn,Gap43,Chn1
15	elemento-AGAGAGAG	0.0563719	3.50821	M4		Nfasc,Igfbp4,Gap43,Ass1,Atp1a3,Mid2,Chn1,Fmod
16	yetfasco-1336	0.0562345	3.49594	M1		Nfasc,Ass1,Sorl1,Kcnh8,Ephb1,Slc22a18,A230065H16Rik,Grin1,Cacna2d3,Fmod,Cacna1a,Pilra,Chn1,Csf1r,Fbxo16,Atp1a3,Fbxo32,Ptgfrn,Gap43,Adcy1,Ahsg
17	transfac_pro-M02836	0.0561144	3.48521	M10	Zic2,Zic3,Zic1,Zfp423	Ass1,Kcnh8,Grin1,Etv4,Fgd2,Cacna1a,Sorl1,2010107G23Rik
18	yetfasco-412	0.0558741	3.46374	M11	Rfx2,Rfx3,Rfx1,Rfx4,Rfx6,Rfx8,Rfx5,Rfxank,Rfxap	Atp1a3,Hic1,Chn1,A230065H16Rik,Rasa4,Cpxm2
19	encode-UW.Motif.0640	0.0558569	3.4622	M2		Nfasc,2210020M01Rik,Igfbp4,Chn1,Etv4,Fbxo32
20	encode-UW.Motif.0395	0.0556166	3.44073	M12		Fmod,Efemp1,Ptgfrn,Sorl1,Nfasc,Chn1,Igfbp4
21	encode-UW.Motif.0542	0.0555308	3.43307	M13		Nfasc,Vax1,Fbxo32,C1qa,Ass1,2210020M01Rik
22	encode-UW.Motif.0400	0.0554621	3.42693	M8		Jarid2,4930583H14Rik,Fmod,Nfasc,Ass1,Chn1,Vax1
23	hdpi-HIST2H2BE	0.0554449	3.4254	M14		Gap43,Kctd12,Vax1,Nfasc,Cacna1a,Efemp1
24	tfdimers-MD00205	0.0554106	3.42233	M15	Gata2,Gata3,Gata4,Gata6,Gata1,Gata5	Hic1,Fmod,Cd48,Efemp1,Chn1,Cacna2d3,Mid2,Gap43,C1qa,Ptpro,Nfasc,Igfbp4
25	yetfasco-554	0.055033	3.38859	M16		Ass1,Etv4,Cacna2d3,Grin1,Nfasc,Adcy1,Gap43,Fmod,Ahsg,Sorl1,Cacna1a,C1qa,Chn1,Kctd12,Efemp1,Cyp3a13,Kif1a,Ptpro,Pilra,Ly86,Myoc,F3,Fbxo32,Slc22a18,Igfbp4,Fez1,2210020M01Rik
26	homer-M01520	0.0547755	3.36559	M11	Rfx1,Rfx2,Rfx3,Rfx8,Rfx6,Rfx5,Rfxank,Rfxap	Atp1a3,Chn1,Hic1,A230065H16Rik,Rasa4,Cpxm2
27	jaspar-CN0044.1	0.054724	3.36099	M14		Cybb,Sema5a,Cacna2d3,Gap43,Kctd12,Chn1,Fez1,Rarres1
28	hdpi-MGC10334	0.0539	3.28738	M17	Gltpd1	Ass1,Etv4,Nfasc,Ephb1,Fmod,2210020M01Rik,Slc22a18,Cacna1a
29	jaspar-CN0154.1	0.0537627	3.27511	M18		A230065H16Rik,Sorl1,Nfasc,Kctd12,Jarid2,Ephb1,Ptgfrn,Ahsg,Rarres1,Ass1,Etv4,Fmod,Chn1,Dner,Cd48,C1qa,4930583H14Rik,Itih3,Fbxo32
30	taipale-NAASATCAAAGN-TCF7L1-full	0.0532306	3.22757	M9	Tcf7l1,Lef1,Tcf7l2,Tcf7,Tcf4	Cacna1a,Gap43,Chn1,4930583H14Rik,Efemp1
31	tfdimers-MD00341	0.0531962	3.2245	M19	Zbtb14,Trp53,Trp63,Trp73,Hic1,Nr3c1,Hand2,Max,Usf2,Tcf12,Mxi1,Myog,Myf6,Mitf,Hand1,Tfeb,Tal1,Mxd4,Nhlh1,Nkx2-1,Myc,Myf5,Mxd1,Arid5b,Tal2,Tcf4,Mxd3,Tcf3,Bhlhe41,Mycs,Smad3,Myb	Nfasc,Ephb1,Slc22a18,Fbxo16,Etv4,Ptpro,Adcy1,Ass1
32	elemento-AGCTGCC	0.0530589	3.21223	M20		Igfbp4,C1qa,Cacna2d3,2210020M01Rik,Ass1,4930583H14Rik,Sardh,Nfasc,Adamts7,Cacna1a,4930578C19Rik,Ptgfrn,Kctd12,Dner,Gap43,Rasa4,Adcy1,Ephb1,Chn1,Slc22a18,Fbxo32,Fgd2,Vax1,A230065H16Rik,Gdf10,Itih3,Etv4,Myoc,Csf1r,Fbxo16,2010107G23Rik
33	encode-UW.Motif.0028	0.0530589	3.21223	M21		Nfasc,Ass1,Fmod,Kctd12,2210020M01Rik,Fgd2,Sorl1,Jarid2,Cpxm2,Ngb,Etv4,Igfbp4,Adcy1,Csf1r
34	homer-M00341	0.0528873	3.1969	M9	Tcf7,Lef1,Tcf7l2,Tcf7l1,Tcf4	Jarid2,Cacna1a,Efemp1,Chn1,4930583H14Rik
35	factorbook-EGR1	0.0526469	3.17543	M13	Egr1,Egr3,Egr4,Egr2,Sp4,Sp2,Sp3,Sp1,Wt1,Zbtb14,Rreb1	Cacna1a,Etv4,Kcnh8,C1qa,Gap43,Hic1
36	transfac_public-M00362	0.0526126	3.17236	M9	Tcf7,Lef1,Tcf7l2,Tcf7l1,Tcf4	Jarid2,Efemp1,Cacna1a,Chn1,4930583H14Rik
37	tiffin-TIFDMEM0000010	0.0524066	3.15396	M7		Vax1,Ptgfrn,Jarid2,Nfasc,Etv4
38	yetfasco-393	0.0523723	3.15089	M16		Ass1,Fmod,2210020M01Rik,A230065H16Rik,C1qa,Gap43,Slc22a18,Sorl1,Igfbp4,Jarid2,Cacna1a,Ahsg,Nfasc,Rarres1,Cyp3a13,Chn1
39	flyfactorsurvey-her_SOLEXA_10_FBgn0001185	0.0522693	3.14169	M21	Zfat,Zfp827	Itgb7,Hic1,Nfasc,Ptgfrn,Mid2
40	transfac_pro-M00947	0.0522693	3.14169	M19	Tfcp2,Tfcp2l1,Yy2	Fmod,Etv4,Ass1,Jarid2,Nfasc
41	hdpi-SOD1	0.0522521	3.14016	M22	Sod1	Ass1,Fmod,Etv4,2210020M01Rik
42	encode-UW.Motif.0577	0.0520976	3.12635	M12		Ass1,Fmod,Ephb1,Ptpro,Chn1,Gdf10,Pilra
43	yetfasco-1334	0.0520461	3.12175	M1		Nfasc,Ass1,Sorl1,Kcnh8,Slc22a18,Ephb1,A230065H16Rik,Cacna1a,Grin1,Chn1,Ptgfrn,Pilra,Cacna2d3,Fbxo32,Atp1a3,C1qa,Ngb,Ahsg,Etv4,Gap43,Adcy1,2210020M01Rik,Sardh,Itgb7,Fbxo16,Csf1r,Kif1a,Fmod,Igfbp4,Vax1,Gpnmb
44	homer-M01858	0.0519946	3.11715	M2	Nfya,Pole4,Hoxc8,Hoxb8,Hoxd8	Etv4,Ephb1,Vax1,Chek2,Cpxm2,Sardh,Nfasc
45	yetfasco-1557	0.0519431	3.11255	M11	Rfx2,Rfx3,Rfx1,Rfx6,Rfx4,Rfx8,Rfx5,Rfxank,Rfxap	Atp1a3,Chn1,Hic1,A230065H16Rik,Cpxm2,Rasa4
46	transfac_pro-M01476	0.0519088	3.10948	M2	Pou2f3,Pou2f2,Pou2f1,Pou5f1,Pou3f2,Pou3f3,Pou3f1,Pou4f1,Pou2af1,Pou3f4,Pax4,Yy1,Pou1f1,Crx	C1qa,Kctd12,Mid2,Sorl1,Jarid2
47	encode-UW.Motif.0582	0.0517887	3.09875	M8		Fmod,Igfbp4,Ass1,Fgd2,Nfasc,Sorl1,Gfra3
48	tfdimers-MD00468	0.051617	3.08341	M10	Runx2,Cbfb,Wt1	Fbxo32,Nfasc,Jarid2,Sorl1,F3,Gap43,Chn1,Slc22a18,Ptpro,Igfbp4
49	encode-UW.Motif.0534	0.0514625	3.06961	M21		Kctd12,Ptpro,Ptgfrn,Fmod,Ly86,Cacna2d3,Jarid2,Gpnmb
50	factorbook-ZNF263	0.0512394	3.04968	M13	Zfp263	Ass1,Igfbp4,Dsc1,Cacna1a,Atp1a3,Nfasc
51	yetfasco-695	0.0512394	3.04968	M2	Pole4,Hoxc8,Hoxb8,Hoxd8	Etv4,Vax1,Ephb1,Chek2,Nfasc,Cpxm2,Sardh
52	factorbook-PU1	0.051205	3.04661	M23	Irf4,Sfpi1,E2f1,Myb,Ep300,E2f6,Tcf4	Cd68,Ptpro,Cybb,Csf1r,Fgd2,Nfasc,Efemp1,Atp1a3,Chn1,Igfbp4
53	yetfasco-885	0.0511192	3.03894	M19		Atp1a3,Etv4,Nfasc,Slc22a18
54	taipale-TTTGCACACGNCAC-MTF1-DBD	0.0510677	3.03434	M24	Mtf1	Etv4,Vax1,Fbxo32,Nfasc,Ass1,Cacna1a,Fmod,Ly86,Adcy1
55	yetfasco-270	0.0510677	3.03434	M12		Jarid2,Vax1,Fmod,Nfasc,Cacna2d3,Csf1r,Cacna1a
56	taipale-NNNNTGCTGACN-Mafb-DBD	0.0508102	3.01134	M2	Mafk,Mafb,Maf,Maff,Nrl,Dbp,Mafg	Nfasc,Csf1r,Kctd12,Ptpro,Fmod
57	elemento-AGCTCCTC	0.0507416	3.0052	M17		Ass1,C1qa,Nfasc,Ms4a4b,Etv4,4930578C19Rik
58	transfac_pro-M02778	0.0506901	3.0006	M24	Mtf1	Vax1,Ptgfrn,Etv4,Cacna1a,Hic1
