# Supplementary material for: Co-expression network analysis identified hub genes critical to triglyceride and free fatty acid metabolism as key regulators of age-related vascular dysfunction in mice
Source: Aging (Albany NY). 2019 Sep 12;11(18):7620–38. doi: 10.18632/aging.102275 (PMC6781998; doi:10.18632/aging.102275)
Supplement: Supplementary Table 11 [file aging-11-102275-s014.xlsx]

## Sheet: Sheet1
Supplementary Table 11. Module membership (MM) of genes within the modules and gene significance (GS) in the blue module and free fatty acide (FFA).
SubstanceBXH	GeneSymbol	LocusLinkID	ModuleColor	GS.FFA	p.GS.FFA	MM.blue	p.MM.blue	MM.turquoise	p.MM.turquoise	MM.red	p.MM.red
MMT00022062	Col13a1	12817	blue	-0.840527	0.000617483	-0.715838	0.00884162	-0.555446	0.0608081	-0.627002	0.0291026
MMT00059097	Sc4mol	66234	blue	0.796025	0.00195206	0.734742	0.00649075	0.320958	0.309056	0.257353	0.419369
MMT00007073	Lrrc2	74249	blue	0.765825	0.00368542	0.617911	0.0322526	0.240321	0.451825	0.398173	0.199863
MMT00055270	Ifitm6	213002	blue	0.763619	0.00384676	0.826492	0.000918214	0.538804	0.0706806	0.390716	0.209193
MMT00001806	Cd84	12523	blue	0.763332	0.00386808	0.786787	0.00239561	0.458833	0.133518	0.38617	0.21501
MMT00082385	Nme4	56520	blue	0.754512	0.00457019	0.870106	0.000233229	0.608061	0.0359343	0.320683	0.309494
MMT00037781	Gas7	14457	blue	0.753602	0.00464776	0.748069	0.00514094	0.682721	0.0144177	0.470297	0.122849
MMT00024264	Alms1	236266	blue	-0.752028	0.00478421	-0.775384	0.00304482	-0.676829	0.0156317	-0.317279	0.314948
MMT00069620	Nova1	18134	blue	0.746868	0.00525303	0.725784	0.00753706	0.370792	0.2354	0.225873	0.480259
MMT00018141	Pik3cd	18707	blue	0.742017	0.00572461	0.775828	0.00301728	0.631428	0.0276521	0.380603	0.222263
MMT00002249	Ank1	11733	turquoise	0.724768	0.0076633	0.542475	0.0684142	0.566607	0.0547514	0.433811	0.158845
MMT00072686	Enpp5	83965	turquoise	0.709347	0.00977932	0.752864	0.00471135	0.89274	9.31e-05	0.551836	0.0628627
MMT00026998	2210020M01Rik	66528	blue	-0.708487	0.00990896	-0.837939	0.000666172	-0.642965	0.024117	-0.4099	0.185716
MMT00078069	1810010H24Rik	69066	blue	0.703982	0.0106087	0.74019	0.0059103	0.531689	0.0752188	0.484681	0.110275
MMT00036455	G6pc2	14378	blue	-0.700049	0.0112491	-0.817955	0.0011498	-0.617037	0.0325678	-0.527099	0.0782502
MMT00005231	Tmie	20776	blue	0.692404	0.0125757	0.735542	0.006403	0.259807	0.41479	0.359632	0.250891
MMT00015631	Atp1a3	232975	blue	0.689859	0.0130418	0.84359	0.000563463	0.512716	0.0882858	0.25145	0.430484
MMT00025305	Olfr430	258713	red	-0.68951	0.0131068	-0.712932	0.00925266	-0.761327	0.00401995	-0.752967	0.00470244
MMT00043771	Plek	56193	blue	0.68585	0.013802	0.683837	0.0141959	0.404179	0.192537	0.482102	0.112464
MMT00063533	Ms4a4b	60361	blue	0.684762	0.0140139	0.887468	0.000117326	0.635404	0.0263941	0.501498	0.0966931
MMT00036250	Ankrd1	107765	turquoise	0.670067	0.0171159	0.543087	0.0680412	0.663411	0.0186754	0.322795	0.306137
MMT00019014	Yars	107271	turquoise	0.666174	0.0180159	0.586993	0.0447998	0.630065	0.0280931	0.3033	0.337893
MMT00016989	Ifi47	15953	blue	0.66527	0.0182298	0.749877	0.00497567	0.181704	0.571947	0.460056	0.132353
MMT00074183	Wrb	71446	blue	0.66508	0.018275	0.900213	6.58e-05	0.716245	0.00878515	0.481805	0.112718
MMT00005653	Ccr5	12774	blue	0.664232	0.0184775	0.767224	0.00358574	0.574958	0.0505046	0.57655	0.0497225
MMT00049862	Pgc	109820	blue	-0.661883	0.0190475	-0.675447	0.0159272	-0.461696	0.1308	-0.630833	0.027844
MMT00007847	Gal3st1	53897	blue	0.65598	0.0205364	0.674571	0.0161165	0.62753	0.0289268	0.445919	0.146236
MMT00040864	Chst2	54371	blue	-0.653874	0.0210877	-0.632272	0.0273815	-0.574924	0.0505214	-0.536097	0.072384
MMT00068712	Fcgr1	14129	blue	0.649483	0.0222715	0.943357	4.17e-06	0.709482	0.00975909	0.616846	0.0326371
MMT00029545	Tob2	57259	blue	-0.648132	0.0226452	-0.545526	0.0665688	-0.416937	0.177533	-0.408555	0.187306
MMT00075488	Slc35d1	242585	blue	0.645543	0.0233744	0.671539	0.0167844	0.312865	0.322099	0.211621	0.509084
MMT00048836	Ear11	93726	turquoise	0.645043	0.023517	0.664587	0.0183926	0.588374	0.0441756	0.261032	0.412512
MMT00081348	Myo1f	17916	blue	0.63963	0.0251032	0.904444	5.33e-05	0.611443	0.0346379	0.392558	0.206865
MMT00041887	Hcst	23900	blue	0.63813	0.0255561	0.708162	0.00995823	0.262338	0.410092	0.407772	0.188235
MMT00029329	Ppfia4	68507	blue	0.63714	0.0258583	0.801502	0.00172057	0.464501	0.128171	0.314622	0.319241
MMT00036564	Pik3cg	30955	blue	0.636362	0.0260974	0.778381	0.00286255	0.535513	0.0727551	0.451724	0.140427
MMT00030373	Crlf1	12931	turquoise	0.633534	0.0269806	0.489705	0.106092	0.781724	0.00266926	0.302392	0.339415
MMT00067186	Irf7	54123	blue	0.628079	0.0287446	0.695314	0.0120578	0.328101	0.297793	0.575579	0.0501984
MMT00044933	Mepe	94111	red	0.627278	0.0290107	0.553324	0.0620101	0.508639	0.0912818	0.604833	0.0372032
MMT00054240	Sox11	20666	blue	0.626811	0.0291665	0.629526	0.0282687	0.453678	0.138506	0.635739	0.02629
MMT00053446	Ptges	64292	blue	0.623361	0.0303362	0.703558	0.0106764	0.224915	0.482173	0.308216	0.329724
MMT00010412	Serpina1d	20703	turquoise	0.621682	0.0309176	0.495604	0.101318	0.679911	0.0149877	0.258214	0.417759
MMT00029984	Sema5a	20356	blue	-0.62062	0.0312896	-0.881728	0.000148963	-0.485757	0.10937	-0.616905	0.0326158
MMT00017992	Gsg1	14840	blue	-0.614949	0.03333	-0.641739	0.0244764	-0.301417	0.341052	-0.607726	0.0360645
MMT00012362	Fcna	14133	turquoise	0.614402	0.0335316	0.564738	0.0557347	0.631908	0.0274979	0.270233	0.395615
MMT00043936	Cd48	12506	blue	0.614163	0.03362	0.907029	4.67e-05	0.387579	0.213197	0.550863	0.0634247
MMT00012971	Mgst2	211666	blue	0.613949	0.0336992	0.82359	0.000992455	0.472587	0.120788	0.382668	0.219556
MMT00000368	Spry1	24063	turquoise	0.613805	0.0337529	0.51936	0.0835478	0.786141	0.00242929	0.362143	0.247354
MMT00060597	Bpgm	12183	blue	0.612011	0.0344236	0.751939	0.00479203	0.742071	0.00571928	0.567488	0.0542923
MMT00080684	BC013712	230787	blue	0.608161	0.0358955	0.854676	0.000397876	0.587201	0.044705	0.579175	0.0484508
MMT00034690	Dok2	13449	blue	0.607891	0.0360003	0.772241	0.0032452	0.562595	0.0568779	0.29255	0.356134
MMT00077323	Jarid2	16468	red	-0.605486	0.0369439	-0.69492	0.012127	-0.782844	0.00260678	-0.829148	0.000854088
MMT00080956	Doc2g	60425	blue	0.603071	0.0379093	0.740727	0.0058553	0.601796	0.0384262	0.47561	0.1181
MMT00025649	Ms4a1	12482	red	0.599994	0.0391654	0.600397	0.038999	0.451035	0.141109	0.623534	0.0302767
MMT00012338	Ptgfrn	19221	blue	-0.59942	0.0394028	-0.852817	0.000422594	-0.689863	0.0130412	-0.637858	0.0256387
MMT00028683	Msx2	17702	blue	0.595841	0.0409071	0.758303	0.00425757	0.422426	0.17131	0.540531	0.0696077
MMT00033710	Muc4	140474	blue	-0.594944	0.0412902	-0.617332	0.0324611	-0.511463	0.0891993	-0.645668	0.0233387
MMT00001160	1500009C09Rik	76505	blue	0.594078	0.0416625	0.74474	0.00545615	0.620291	0.0314055	0.524349	0.0801052
MMT00006698	Olfr667	259062	turquoise	0.587433	0.0446002	0.474454	0.119123	0.508517	0.0913729	0.480637	0.11372
MMT00046154	9330182L06Rik	231014	turquoise	0.583464	0.0464228	0.613695	0.0337935	0.840838	0.000611822	0.33246	0.291035
MMT00017876	H2-DMb1	14999	blue	0.583168	0.0465605	0.87847	0.000169673	0.688615	0.0132743	0.503437	0.0952025
MMT00051022	Fgd2	26382	blue	0.582236	0.0469973	0.923911	1.77e-05	0.701362	0.0110322	0.440713	0.151576
MMT00037447	Trem2	83433	blue	0.577581	0.0492199	0.747259	0.00521635	0.756249	0.00442484	0.66238	0.0189259
MMT00073624	Hcrtr1	230777	blue	-0.576553	0.0497207	-0.776895	0.00295184	-0.7577	0.00430615	-0.301528	0.340865
MMT00071233	Pou2af1	18985	blue	0.575982	0.0500006	0.705804	0.0103214	0.474674	0.118928	0.575587	0.0501943
MMT00006988	Olig1	50914	blue	0.574237	0.050862	0.806135	0.00154173	0.640222	0.0249261	0.436519	0.155967
MMT00040374	Trim9	94090	turquoise	0.574017	0.0509712	0.584393	0.0459914	0.70161	0.0109917	0.543983	0.0674979
MMT00021096	H2-DMa	14998	blue	0.572767	0.0515956	0.784912	0.00249434	0.447281	0.14486	0.467906	0.125027
MMT00044207	Kctd16	383348	blue	-0.572755	0.0516016	-0.767597	0.00355956	-0.466627	0.126202	-0.486534	0.10872
MMT00055921	Retnla	57262	turquoise	0.5701	0.0529461	0.591274	0.042885	0.783153	0.00258971	0.321961	0.307461
MMT00060071	Hpgd	15446	blue	0.569714	0.0531433	0.742077	0.00571867	0.477935	0.116061	0.543681	0.0676804
MMT00081499	Gfra2	14586	red	0.567946	0.0540542	0.659189	0.0197169	0.720111	0.00826205	0.63541	0.0263923
MMT00076599	Ece2	107522	turquoise	0.566236	0.0549457	0.662638	0.0188629	0.698317	0.0115401	0.348413	0.26705
MMT00077375	Cd68	12514	blue	0.562645	0.0568511	0.896084	8e-05	0.678438	0.0152931	0.554502	0.0613411
MMT00036723	Slc9a9	331004	blue	0.561124	0.0576718	0.714602	0.0090147	0.661587	0.0191203	0.606456	0.0365613
MMT00000608	Ccl5	20304	blue	0.559708	0.0584432	0.777084	0.00294035	0.456848	0.135425	0.437054	0.155402
MMT00062933	Tox	252838	red	0.557591	0.0596099	0.540044	0.069909	0.425784	0.167572	0.481019	0.113391
MMT00006067	Adra2a	11551	blue	-0.555061	0.061025	-0.669917	0.01715	-0.348147	0.267441	-0.557983	0.0593925
MMT00014165	Klhl6	239743	blue	0.554181	0.0615225	0.800967	0.00174221	0.498536	0.0989991	0.390941	0.208908
MMT00030404	C1qa	12259	blue	0.553588	0.0618601	0.783207	0.00258677	0.541922	0.0687524	0.443667	0.148531
MMT00053670	Chn1	108699	blue	0.552735	0.0623468	0.820083	0.00108829	0.567429	0.0543227	0.353885	0.259095
MMT00026944	Igfbp2	16008	turquoise	0.550361	0.0637163	0.520705	0.0826099	0.858687	0.00034836	0.56665	0.054729
MMT00012541	Lcp1	18826	blue	0.550061	0.0638909	0.745913	0.00534346	0.365635	0.242485	0.465036	0.127673
MMT00010362	Grb10	14783	blue	-0.549623	0.0641462	-0.789686	0.00224891	-0.544969	0.0669032	-0.439623	0.152709
MMT00058358	1700093K21Rik	67358	blue	0.546882	0.0657603	0.548599	0.0647458	0.502412	0.0959884	0.349837	0.264967
MMT00031281	Il3ra	16188	turquoise	0.544328	0.0672896	0.53765	0.0714035	0.737577	0.00618364	0.332498	0.290976
MMT00046052	Ptger1	19216	red	0.543217	0.0679619	0.560044	0.0582595	0.703236	0.0107281	0.687578	0.0134705
MMT00025100	Sppl3	74585	blue	-0.54166	0.0689127	-0.671095	0.0168838	-0.405008	0.191539	-0.629832	0.028169
MMT00056355	Mill1	266815	blue	0.541247	0.0691666	0.560472	0.0580258	0.50276	0.095721	0.489645	0.106141
MMT00037199	Adcy9	11515	blue	-0.537549	0.0714667	-0.696334	0.0118801	-0.310524	0.325926	-0.524206	0.0802025
MMT00002362	Fmnl1	57778	blue	0.536028	0.0724281	0.680134	0.0149418	0.396225	0.202276	0.648251	0.0226122
MMT00012709	Olfr1477	258691	red	0.533187	0.0742473	0.496068	0.100948	0.532466	0.0747133	0.559235	0.0587023
MMT00059077	Oas1a	246730	red	0.530625	0.0759138	0.69239	0.0125782	0.345185	0.271807	0.68734	0.0135159
MMT00005428	D430019H16Rik	268595	turquoise	-0.5276	0.0779149	-0.557739	0.0595276	-0.756481	0.00440569	-0.569307	0.0533519
MMT00038361	Tgfbr3	21814	turquoise	-0.527434	0.0780261	-0.746756	0.00526361	-0.778948	0.00282907	-0.406113	0.190215
MMT00010449	Cacng5	140723	turquoise	0.526936	0.078359	0.499634	0.0981397	0.660397	0.0194147	0.271477	0.393358
MMT00073282	Itgb2	16414	blue	0.525249	0.0794949	0.628789	0.0285104	0.297335	0.347951	0.519929	0.0831499
MMT00079309	Exo1	26909	blue	-0.52433	0.0801186	-0.727243	0.00735861	-0.455339	0.136886	-0.372769	0.232716
MMT00033205	Cst7	13011	blue	0.523402	0.0807513	0.805158	0.00157821	0.415795	0.178846	0.614583	0.0334647
MMT00003475	Alg12	223774	blue	0.523378	0.0807678	0.782261	0.00263915	0.465255	0.12747	0.41577	0.178875
MMT00022784	Usp18	24110	blue	0.523038	0.0810007	0.741789	0.00574755	0.246784	0.43937	0.478508	0.115562
MMT00045480	Gyk	14933	turquoise	-0.522143	0.0816157	-0.532635	0.0746039	-0.55029	0.0637572	-0.420849	0.173084
MMT00042016	Sim1	20464	red	0.519394	0.0835239	0.505481	0.0936493	0.467788	0.125135	0.66985	0.0171651
MMT00076717	Diap3	56419	blue	-0.519378	0.0835351	-0.790844	0.00219224	-0.547019	0.065679	-0.44523	0.146936
MMT00033707	Hs6st3	50787	red	0.518779	0.0839548	0.621342	0.0310363	0.520944	0.0824442	0.639284	0.0252072
MMT00078815	Ptprf	19268	turquoise	-0.515746	0.0861029	-0.493645	0.102887	-0.791204	0.00217488	-0.428359	0.164739
MMT00054089	Itgb7	16421	blue	0.514729	0.0868321	0.871309	0.000223094	0.479859	0.114391	0.422428	0.171308
MMT00032770	1700065I16Rik	78462	blue	-0.513907	0.0874233	-0.302137	0.339842	-0.310648	0.325723	-0.422244	0.171514
MMT00063663	Rgs1	50778	turquoise	0.510384	0.0899911	0.663006	0.0187734	0.673187	0.0164187	0.470546	0.122624
MMT00029403	2010107G23Rik	69894	blue	0.509261	0.0908202	0.843989	0.000556705	0.407235	0.188875	0.416499	0.178036
MMT00046734	Sardh	192166	blue	0.507588	0.092065	0.837336	0.000677921	0.709069	0.00982113	0.566505	0.054805
MMT00054422	Mrc1	17533	blue	0.506929	0.0925587	0.715567	0.00887941	0.678821	0.0152132	0.360504	0.249659
MMT00006323	Ache	11423	turquoise	0.506445	0.0929222	0.590598	0.0431834	0.768224	0.0035158	0.426521	0.166757
MMT00018370	Csf3	12985	blue	-0.506077	0.0931989	-0.73652	0.00629678	-0.423827	0.169744	-0.20723	0.518114
MMT00067079	Fetub	59083	turquoise	0.505234	0.093836	0.777107	0.00293897	0.81089	0.00137338	0.600018	0.0391556
MMT00038451	4930417G10Rik	74855	blue	-0.504136	0.0946696	-0.633521	0.0269847	-0.49706	0.100162	-0.280278	0.377579
MMT00063470	Agxt	11611	turquoise	-0.502172	0.0961732	-0.730646	0.00695468	-0.753863	0.00462542	-0.549434	0.0642564
MMT00022777	C530028O21Rik	319352	blue	0.502114	0.0962179	0.742555	0.00567083	0.698638	0.0114858	0.317719	0.31424
MMT00008854	H2-Q7	15018	blue	0.499405	0.0983185	0.89248	9.42e-05	0.535086	0.0730277	0.479252	0.114916
MMT00025067	Rgs18	64214	blue	0.499247	0.0984425	0.700384	0.0111935	0.650618	0.021961	0.239879	0.452683
MMT00008639	Olfr975	258825	blue	-0.494054	0.102558	-0.559634	0.0584833	-0.402896	0.194088	-0.509782	0.0904354
MMT00001955	Olfr1265	258340	turquoise	0.492965	0.103436	0.618673	0.0319799	0.626179	0.0293781	0.586342	0.0450961
MMT00015455	4930550C17Rik	75245	blue	0.491582	0.104557	0.476848	0.117012	0.30712	0.331536	0.488829	0.106814
MMT00005510	Ahsg	11625	turquoise	0.489265	0.106454	0.609831	0.0352514	0.871684	0.00022001	0.574987	0.0504907
MMT00060813	Sdc3	20970	blue	0.486829	0.108474	0.75314	0.0046875	0.575776	0.0501016	0.535876	0.0725244
MMT00045956	Il10ra	16154	blue	0.486362	0.108863	0.784695	0.00250594	0.395113	0.203661	0.50114	0.0969695
MMT00016783	Podn	242608	turquoise	-0.485303	0.109751	-0.4732	0.12024	-0.449436	0.142699	-0.452772	0.139394
MMT00061212	Ccnd1	12443	turquoise	0.484896	0.110094	0.65401	0.0210519	0.818264	0.00114068	0.336513	0.284831
MMT00036143	Glipr2	384009	turquoise	0.483821	0.111002	0.554532	0.0613239	0.720234	0.00824578	0.35057	0.263897
MMT00026709	Vnn1	22361	blue	-0.481816	0.112708	-0.765567	0.00370401	-0.645434	0.0234053	-0.552931	0.0622349
MMT00016676	Kcnk5	16529	blue	0.480941	0.113459	0.687447	0.0134954	0.310271	0.326341	0.366136	0.241792
MMT00065736	Cyp2b9	13094	red	0.4804	0.113924	0.599027	0.0395662	0.35668	0.255085	0.535454	0.0727929
MMT00068509	Oit3	18302	blue	0.477249	0.11666	0.75031	0.00493669	0.449798	0.142337	0.46037	0.132054
MMT00065808	4933424G06Rik	71166	red	-0.477212	0.116692	-0.432154	0.160621	-0.641649	0.0245028	-0.676189	0.015768
MMT00037740	Ptpro	19277	blue	0.473177	0.12026	0.815576	0.00122168	0.5261	0.0789206	0.434383	0.158234
MMT00011577	Il28ra	242700	turquoise	0.472487	0.120877	0.762916	0.00389926	0.810289	0.00139387	0.499181	0.098494
MMT00044885	Capn9	73647	turquoise	0.47066	0.122521	0.607629	0.0361023	0.655502	0.0206607	0.376311	0.227954
MMT00081993	Col8a1	12837	blue	0.470292	0.122854	0.66167	0.0190999	0.709839	0.00970579	0.360082	0.250255
MMT00056703	Serpinb6b	20708	turquoise	0.469046	0.123986	0.480649	0.11371	0.607055	0.0363265	0.364568	0.243967
MMT00049304	Cyp3a13	13113	blue	0.468922	0.124098	0.897651	7.43e-05	0.521403	0.0821264	0.466324	0.126481
MMT00079177	Card14	170720	turquoise	-0.468792	0.124217	-0.612519	0.0342326	-0.801272	0.00172984	-0.56618	0.0549751
MMT00060215	Pln	18821	blue	0.467876	0.125054	0.612477	0.0342485	0.455122	0.137097	0.409069	0.186698
MMT00014701	Cdon	57810	blue	-0.467403	0.125488	-0.786062	0.00243341	-0.759791	0.00413938	-0.693608	0.0123593
MMT00055430	S100a3	20197	blue	0.466797	0.126045	0.672866	0.0164896	0.406637	0.189588	0.365909	0.242105
MMT00069832	Mbd2	17191	turquoise	0.466587	0.126239	0.34566	0.271104	0.684927	0.0139816	0.55208	0.0627228
MMT00035113	Nkg7	72310	red	0.466296	0.126507	0.702756	0.0108054	0.56229	0.0570414	0.802939	0.00166351
MMT00037375	Skiv2l	108077	turquoise	0.465127	0.127589	0.816364	0.0011975	0.92707	1.44e-05	0.730913	0.00692368
MMT00033072	Rnf103	22644	blue	-0.461719	0.130778	-0.614463	0.0335093	-0.436433	0.156057	-0.553113	0.0621308
MMT00028633	Frzb	20378	blue	0.460267	0.132152	0.712125	0.00936943	0.715806	0.00884604	0.346181	0.270335
MMT00037977	2810474O19Rik	67246	red	-0.459798	0.132598	-0.448829	0.143305	-0.28446	0.370198	-0.713624	0.0091536
MMT00000760	Tcrb-J	21580	turquoise	-0.459242	0.133127	-0.673999	0.0162409	-0.885468	0.000127681	-0.710877	0.00955191
MMT00023471	Tyrobp	22177	blue	0.458493	0.133844	0.735439	0.00641423	0.311932	0.32362	0.475252	0.118417
MMT00070418	Adra2c	11553	turquoise	0.458147	0.134175	0.696718	0.0118136	0.79187	0.00214296	0.38722	0.213658
MMT00004917	Cyp2b10	13088	red	0.45696	0.135317	0.520178	0.0829765	0.395368	0.203343	0.640668	0.0247933
MMT00078239	Homer3	26558	turquoise	0.455801	0.136437	0.615434	0.033152	0.807218	0.00150206	0.482679	0.111972
MMT00058269	Tas2r105	57252	blue	-0.454872	0.13734	-0.425247	0.168166	-0.421422	0.172438	-0.359754	0.250718
MMT00012907	Rest	19712	blue	-0.454638	0.137568	-0.798491	0.00184504	-0.377045	0.226975	-0.468938	0.124084
MMT00080633	Cxcr6	80901	turquoise	0.454257	0.137939	0.686695	0.0136392	0.757995	0.00428234	0.33775	0.282951
MMT00009738	Ropn1	76378	blue	0.45353	0.138651	0.56718	0.0544521	0.191208	0.551646	0.506105	0.0931777
MMT00069732	Calb1	12307	turquoise	0.452601	0.139562	0.673586	0.0163311	0.693864	0.0123138	0.367918	0.239334
MMT00008186	Ubtf	21429	blue	-0.452591	0.139572	-0.838073	0.000663574	-0.531992	0.0750211	-0.695722	0.0119864
MMT00027774	Kcne1l	66240	turquoise	-0.450846	0.141296	-0.484367	0.11054	-0.66102	0.0192602	-0.586895	0.0448441
MMT00067891	Folr2	14276	blue	0.448998	0.143136	0.693188	0.0124345	0.663548	0.0186422	0.445747	0.14641
MMT00033228	Ly86	17084	blue	0.448624	0.14351	0.841418	0.000601363	0.440937	0.151344	0.602728	0.0380479
MMT00070310	Kctd12	239217	turquoise	0.447249	0.144892	0.712595	0.00930135	0.912144	3.55e-05	0.576882	0.0495604
MMT00069681	Tnnc2	21925	blue	-0.446142	0.146011	-0.700336	0.0112014	-0.472806	0.120591	-0.510958	0.0895697
MMT00022494	Slc22a18	18400	turquoise	0.444392	0.14779	0.642624	0.0242167	0.903507	5.59e-05	0.626539	0.0292574
MMT00019749	Dach2	93837	blue	-0.443614	0.148585	-0.620355	0.0313828	-0.366944	0.240675	-0.288115	0.363808
MMT00050965	Slc15a3	65221	blue	0.4436	0.148599	0.760153	0.00411097	0.683619	0.0142391	0.710916	0.00954616
MMT00031183	Mdk	17242	blue	0.443324	0.148882	0.737738	0.00616652	0.911992	3.58e-05	0.500131	0.0977528
MMT00070618	Npl	74091	blue	0.441705	0.150549	0.77599	0.00300722	0.395009	0.203791	0.432277	0.16049
MMT00015288	1700015G11Rik	75529	turquoise	0.440174	0.152136	0.650053	0.0221153	0.60678	0.036434	0.629844	0.0281651
MMT00009954	Olfr470	258417	blue	-0.439892	0.152429	-0.780814	0.00272085	-0.48674	0.108548	-0.448652	0.143482
MMT00072852	Bai2	230775	turquoise	-0.439601	0.152733	-0.574956	0.0505057	-0.724673	0.00767519	-0.670214	0.0170826
MMT00049421	Cd79b	15985	blue	0.438936	0.153426	0.670136	0.0171003	0.355704	0.256482	0.571724	0.052121
MMT00026943	Rorb	225998	blue	0.437794	0.154623	0.750288	0.00493867	0.636824	0.025955	0.574587	0.0506883
MMT00014106	4933400C23	331003	blue	0.437703	0.154719	0.684952	0.0139767	0.377568	0.226279	0.64327	0.0240284
MMT00063550	Fbxo32	67731	blue	-0.437649	0.154776	-0.827276	0.000898913	-0.36203	0.247512	-0.343562	0.274219
MMT00077956	Ltbp2	16997	blue	0.436969	0.155492	0.768184	0.00351861	0.413907	0.181028	0.492369	0.103918
MMT00018095	Gk2	14626	blue	-0.434386	0.15823	-0.677876	0.0154107	-0.347951	0.267727	-0.300583	0.342456
MMT00044688	Akr1c12	27383	blue	0.433496	0.159181	0.738715	0.00606347	0.239443	0.453529	0.554779	0.0611842
MMT00028973	Cyp11a1	13070	red	0.432921	0.159798	0.633151	0.0271017	0.531863	0.0751055	0.849712	0.000466515
MMT00027892	Mmp20	30800	turquoise	0.432004	0.160783	0.586107	0.0452031	0.635071	0.0264978	0.480851	0.113536
MMT00066381	Tnfsf4	22164	red	0.431149	0.161705	0.384801	0.21678	0.205131	0.522456	0.633394	0.0270248
MMT00071842	Prrx2	20204	blue	0.431035	0.161829	0.690231	0.0129728	0.631616	0.0275915	0.359466	0.251125
MMT00016669	Gp49a	14727	blue	0.428932	0.164113	0.766448	0.00364076	0.488678	0.106938	0.339761	0.279912
MMT00070149	2010106E10Rik	67715	red	0.427538	0.165639	0.542786	0.0682244	0.735354	0.00642352	0.704571	0.0105152
MMT00026736	Olfr24	18322	blue	-0.427378	0.165815	-0.656631	0.0203683	-0.369634	0.23698	-0.491185	0.10488
MMT00081727	Tbc1d12	209478	blue	0.426001	0.167332	0.661364	0.0191753	0.476749	0.117099	0.467338	0.125548
MMT00079572	9430091E24Rik	77368	blue	-0.424479	0.169018	-0.770279	0.0033753	-0.552697	0.0623683	-0.510491	0.0899123
MMT00079156	Ms4a4d	66607	blue	0.423713	0.169871	0.682578	0.0144463	0.782895	0.00260396	0.429192	0.16383
MMT00042972	Aox1	11761	blue	0.423654	0.169936	0.835355	0.000717695	0.393728	0.205393	0.396413	0.202043
MMT00009429	Serpinb13	241196	blue	0.423528	0.170078	0.772281	0.00324262	0.687843	0.0134202	0.326775	0.299867
MMT00034448	Tnmd	64103	blue	0.418974	0.175207	0.742302	0.00569606	0.755183	0.00451365	0.418556	0.175683
MMT00054808	Csf1r	12978	blue	0.416135	0.178454	0.835665	0.000711353	0.755376	0.00449745	0.508427	0.0914396
MMT00051228	Gfra3	14587	red	-0.415678	0.17898	-0.444717	0.147458	-0.555021	0.0610475	-0.826124	0.000927379
MMT00058927	3110009E18Rik	73103	blue	-0.414914	0.179862	-0.468615	0.124379	-0.366562	0.241203	-0.547846	0.0651891
MMT00078723	Mmp2	17390	blue	0.414452	0.180397	0.69123	0.0127891	0.703076	0.0107538	0.548623	0.0647317
MMT00020142	Adam34	252866	blue	0.413712	0.181254	0.655736	0.0205997	0.585496	0.0454834	0.488703	0.106918
MMT00051052	Insl5	23919	red	-0.413556	0.181437	-0.525947	0.0790234	-0.567648	0.0542087	-0.734728	0.00649236
MMT00064871	Oxtr	18430	blue	0.412584	0.182568	0.767904	0.00353812	0.541559	0.0689749	0.301141	0.341516
MMT00007011	Samd8	67630	red	-0.411634	0.183678	-0.696822	0.0117956	-0.339703	0.279999	-0.54503	0.0668669
MMT00013511	Olfr1504	258627	blue	0.411452	0.183892	0.78463	0.00250945	0.710778	0.00956648	0.623946	0.0301357
MMT00015239	Gdap1	14545	turquoise	0.410663	0.184818	0.692659	0.0125295	0.840505	0.000617874	0.625192	0.0297112
MMT00038153	Erdr1	170942	red	-0.408875	0.186928	-0.385854	0.215417	-0.406824	0.189365	-0.482916	0.11177
MMT00021946	Rfx4	71137	turquoise	-0.407896	0.188089	-0.680488	0.0148693	-0.839739	0.000631995	-0.689313	0.0131435
MMT00035020	Prkar1b	19085	turquoise	0.407766	0.188242	0.665443	0.0181886	0.894813	8.48e-05	0.481905	0.112632
MMT00009050	Map3k2	26405	red	-0.406897	0.189278	-0.558721	0.0589848	-0.47563	0.118083	-0.750925	0.00488167
MMT00047748	Cdc6	23834	blue	0.404537	0.192107	0.384774	0.216815	0.28153	0.37536	0.604336	0.0374014
MMT00024699	9230104L09Rik	77705	red	0.404505	0.192145	0.432325	0.160437	0.218472	0.495133	0.55323	0.0620636
MMT00016365	Sncaip	67847	blue	-0.403008	0.193952	-0.666177	0.0180153	-0.550395	0.0636966	-0.620387	0.0313716
MMT00067646	Ccl24	56221	turquoise	0.401322	0.196002	0.552771	0.0623261	0.793888	0.00204856	0.568843	0.0535906
MMT00019015	Dpys	64705	blue	-0.400876	0.196546	-0.791911	0.00214104	-0.627164	0.0290487	-0.592348	0.0424138
MMT00057059	P2rx7	18439	turquoise	0.397537	0.200649	0.590818	0.0430859	0.824708	0.000963322	0.288453	0.36322
MMT00011649	Jph3	57340	red	0.396814	0.201545	0.523915	0.0804008	0.323028	0.305768	0.741997	0.00572662
MMT00058330	Olfr281	258277	red	0.394646	0.204244	0.340555	0.278716	0.521661	0.0819478	0.713473	0.00917512
MMT00036955	Jrk	16469	blue	0.394162	0.20485	0.610293	0.0350749	0.793859	0.00204986	0.373292	0.232009
MMT00074216	Cyp2b19	13090	blue	0.393634	0.205512	0.62677	0.0291802	0.358515	0.252473	0.503507	0.0951497
MMT00005482	Ibsp	15891	turquoise	0.393114	0.206165	0.471621	0.121655	0.902159	5.98e-05	0.461633	0.130859
MMT00020883	Kit	16590	blue	0.392844	0.206505	0.658204	0.019966	0.291492	0.357957	0.40909	0.186673
MMT00041665	Upp1	22271	red	0.391452	0.208261	0.267179	0.401185	0.67153	0.0167865	0.644498	0.0236735
MMT00080083	Wt1	22431	turquoise	-0.389093	0.211259	-0.540734	0.0694828	-0.776789	0.00295829	-0.563024	0.0566475
MMT00004123	Cdkn2a	12578	blue	0.388672	0.211796	0.768697	0.00348308	0.718773	0.00844035	0.466347	0.12646
MMT00068584	Bid	12122	turquoise	0.385933	0.215315	0.614417	0.0335262	0.765221	0.00372901	0.29196	0.357151
MMT00059295	Cab39	12283	blue	-0.384975	0.216555	-0.845126	0.000537789	-0.710757	0.00956964	-0.651926	0.0216072
MMT00056119	Gga1	106039	red	0.382955	0.219181	0.701813	0.0109585	0.497835	0.0995505	0.72727	0.00735542
MMT00026973	Mx1	17857	blue	0.38173	0.220783	0.842432	0.000583441	0.691705	0.0127024	0.572031	0.0519661
MMT00049504	Slc6a4	15567	turquoise	0.381519	0.22106	0.622434	0.0306565	0.864557	0.000284699	0.609031	0.0355588
MMT00031333	Pcdhb13	93884	blue	0.380171	0.222832	0.596569	0.0405978	0.750147	0.00495128	0.400921	0.196491
MMT00031488	Sorl1	20660	blue	-0.377214	0.22675	-0.889767	0.000106245	-0.644482	0.0236779	-0.703266	0.0107232
MMT00017740	Vps52	224705	blue	0.376641	0.227514	0.733289	0.00665259	0.36582	0.242229	0.320118	0.310397
MMT00038375	AW146020	330361	blue	0.374772	0.230016	0.756611	0.00439502	0.468198	0.12476	0.605662	0.0368744
MMT00065768	Igfbp4	16010	turquoise	0.374275	0.230684	0.67518	0.0159846	0.940974	5.11e-06	0.79861	0.00184
MMT00056668	Ccl28	56838	blue	0.373147	0.232205	0.641252	0.0246201	0.380393	0.222539	0.538832	0.0706628
MMT00082736	4931428L18Rik	70988	turquoise	-0.371851	0.23396	-0.5103	0.0900533	-0.616372	0.0328093	-0.704015	0.0106035
MMT00059245	Rarres1	109222	turquoise	0.371718	0.23414	0.551143	0.0632627	0.851018	0.000447629	0.427919	0.165222
MMT00009424	Traf2	22030	blue	0.369823	0.236721	0.641389	0.0245794	0.576481	0.0497562	0.445159	0.147008
MMT00048340	Efemp1	216616	turquoise	0.369553	0.237091	0.69351	0.0123768	0.832196	0.000784832	0.444256	0.147928
MMT00000858	Lyl1	17095	blue	0.369515	0.237143	0.507005	0.0925015	0.516273	0.0857274	0.527148	0.0782168
MMT00004176	Cybb	13058	blue	0.368009	0.239207	0.831776	0.00079411	0.520735	0.082589	0.473299	0.120151
MMT00069165	Fbln5	23876	turquoise	0.368008	0.239209	0.593914	0.0417333	0.856087	0.000379873	0.659867	0.0195469
MMT00018482	D14Ertd668e	219132	red	0.36655	0.241219	0.614889	0.0333519	0.545649	0.0664956	0.853166	0.000417859
MMT00062400	Dpp7	83768	turquoise	0.366141	0.241785	0.463482	0.129122	0.777472	0.00291694	0.473384	0.120075
MMT00080429	Slc15a2	57738	blue	0.365543	0.242613	0.469157	0.123885	0.505179	0.0938776	0.528893	0.0770557
MMT00080177	Gzmk	14945	turquoise	0.365203	0.243085	0.604376	0.0373854	0.590787	0.0430997	0.437187	0.155262
MMT00070222	Rasa4	54153	turquoise	0.364503	0.244058	0.601026	0.0387408	0.928271	1.32e-05	0.502323	0.096057
MMT00043465	1700011F03Rik	74221	blue	-0.36408	0.244647	-0.65417	0.0210095	-0.438163	0.154236	-0.527603	0.0779133
MMT00022586	Apod	11815	blue	0.36308	0.246042	0.604095	0.0374978	0.684719	0.0140222	0.439746	0.15258
MMT00013664	Crb1	170788	red	-0.362969	0.246198	-0.399575	0.198138	-0.483202	0.111526	-0.727664	0.00730767
MMT00047610	Cst9	13013	turquoise	-0.362925	0.246259	-0.634586	0.0266495	-0.87126	0.000223506	-0.644211	0.0237559
MMT00082376	Scn1b	20266	turquoise	0.361173	0.248716	0.585259	0.045592	0.828749	0.000863506	0.529156	0.0768816
MMT00033261	Pcdhb15	93886	red	0.359688	0.250811	0.718873	0.008427	0.51517	0.0865153	0.64943	0.0222863
MMT00025169	Insrr	23920	turquoise	0.357694	0.25364	0.623472	0.0302981	0.809381	0.00142522	0.726285	0.00747541
MMT00000777	F3	14066	turquoise	0.356761	0.25497	0.576822	0.0495894	0.873889	0.000202524	0.335305	0.286671
MMT00079222	Cntn1	12805	turquoise	0.355417	0.256893	0.429443	0.163557	0.746574	0.00528078	0.512941	0.0881226
MMT00065097	Clca4	229927	red	-0.354837	0.257725	-0.638345	0.0254907	-0.7187	0.00845017	-0.891246	9.96e-05
MMT00060459	Klrb1c	17059	red	0.353652	0.259431	0.492062	0.104167	0.372436	0.233167	0.789672	0.00224959
MMT00024227	Olfr923	258812	red	-0.353433	0.259746	-0.73263	0.00672699	-0.641917	0.0244238	-0.717348	0.00863341
MMT00020287	Ifit1	15957	red	0.351272	0.262876	0.591012	0.0430005	0.475216	0.118448	0.692062	0.0126375
MMT00013974	Drd1a	13488	blue	0.349702	0.265164	0.631781	0.0275386	0.621064	0.0311338	0.561423	0.0575096
MMT00067789	Svs5	20944	turquoise	-0.349613	0.265294	-0.506892	0.092586	-0.737528	0.0061888	-0.582589	0.0468316
MMT00022926	Myoc	17926	turquoise	0.349537	0.265404	0.623013	0.0304561	0.926338	1.51e-05	0.542587	0.0683458
MMT00018994	Akp3	11648	blue	0.349289	0.265767	0.482011	0.112542	0.422834	0.170853	0.60939	0.0354206
MMT00020871	Fcer1a	14125	turquoise	0.349026	0.266151	0.693357	0.0124043	0.864264	0.000287647	0.534318	0.0735192
MMT00032750	Atp1b4	67821	turquoise	0.347956	0.267721	0.455728	0.136508	0.728793	0.00717253	0.541663	0.0689109
MMT00035279	Fez1	235180	turquoise	0.344362	0.273028	0.58499	0.0457157	0.892881	9.26e-05	0.531651	0.0752432
MMT00053386	Rasgrp4	233046	red	0.342938	0.275148	0.685834	0.0138052	0.599013	0.0395719	0.539361	0.0703335
MMT00079355	2010003O02Rik	66434	red	0.342112	0.276382	0.64444	0.02369	0.633191	0.0270891	0.832969	0.00076796
MMT00036071	Cacna1b	12287	red	0.340737	0.278443	0.478031	0.115977	0.65202	0.0215819	0.707298	0.0100902
MMT00030162	Trpv5	194352	blue	0.340443	0.278885	0.655337	0.0207036	0.431785	0.161019	0.568537	0.0537485
MMT00013893	Cyp2s1	74134	turquoise	-0.336593	0.284709	-0.413841	0.181105	-0.686553	0.0136664	-0.604974	0.0371473
MMT00047171	Icam1	15894	turquoise	0.336053	0.285531	0.586688	0.0449382	0.697679	0.0116486	0.550776	0.0634751
MMT00037307	Cpa4	71791	blue	0.335226	0.286792	0.43476	0.157832	0.266954	0.401596	0.575501	0.0502368
MMT00021452	Olfr1298	258888	red	-0.332657	0.290731	-0.445901	0.146255	-0.522896	0.081098	-0.799002	0.00182348
MMT00030138	Clcn1	12723	blue	-0.332613	0.2908	-0.799132	0.00181798	-0.59189	0.042614	-0.670853	0.0169384
MMT00018414	Ifi202b	26388	red	0.332111	0.291574	0.395167	0.203593	0.31168	0.324033	0.649855	0.0221694
MMT00025695	Slc26a3	13487	red	0.329886	0.295016	0.412202	0.183014	0.484279	0.110614	0.461181	0.131286
MMT00026217	Mid2	23947	red	-0.327254	0.299117	-0.463272	0.129318	-0.564505	0.0558582	-0.841054	0.000607913
MMT00077777	4932414N04Rik	75721	turquoise	-0.323734	0.304651	-0.680739	0.014818	-0.608322	0.0358329	-0.401313	0.196012
MMT00056571	BC026585	226527	turquoise	0.323398	0.305183	0.763044	0.00388962	0.774174	0.00312078	0.542262	0.068544
MMT00049992	Bspry	192120	red	0.319306	0.311694	0.479719	0.114512	0.445661	0.146498	0.721012	0.00814352
MMT00053034	Kif1a	16560	turquoise	0.318714	0.312643	0.469473	0.123597	0.93431	8.62e-06	0.489028	0.10665
MMT00055414	Pla2g2f	26971	red	-0.318455	0.313058	-0.477311	0.116606	-0.516519	0.0855524	-0.650353	0.0220334
MMT00049364	Kbtbd10	228003	blue	-0.318449	0.313068	-0.599412	0.0394062	-0.428887	0.164163	-0.497977	0.0994384
MMT00018014	Pard6g	93737	blue	-0.318394	0.313156	-0.731989	0.0067999	-0.805328	0.00157182	-0.685882	0.0137958
MMT00064623	Abcc6	27421	turquoise	0.317452	0.314669	0.485991	0.109174	0.556301	0.0603287	0.426472	0.166812
MMT00037600	Cacna1a	12286	red	0.317413	0.314732	0.514283	0.0871527	0.569559	0.0532227	0.805822	0.00155337
MMT00015096	Slc6a15	103098	turquoise	-0.315102	0.318464	-0.345926	0.270712	-0.654747	0.0208578	-0.563826	0.0562194
MMT00048579	Nrap	18175	turquoise	0.314962	0.318691	0.507711	0.0919729	0.731618	0.00684239	0.639305	0.0252008
MMT00020772	Ctdsp2	52468	turquoise	-0.313444	0.321155	-0.724233	0.00773035	-0.80863	0.00145154	-0.674822	0.0160619
MMT00036749	1190002N15Rik	68861	blue	-0.312255	0.323093	-0.717913	0.00855645	-0.561537	0.0574479	-0.669448	0.0172567
MMT00013479	Olfr1501	258626	red	-0.309775	0.327156	-0.47223	0.121108	-0.552295	0.0625987	-0.692038	0.0126418
MMT00072505	Abp1	76507	blue	0.307629	0.330693	0.616297	0.0328365	0.317917	0.313921	0.572072	0.0519452
MMT00015950	Cnksr2	245684	blue	-0.30736	0.331138	-0.692773	0.012509	-0.297234	0.348123	-0.638977	0.0252995
MMT00059441	Pilra	231805	red	-0.307071	0.331617	-0.421744	0.172076	-0.492143	0.104101	-0.840189	0.00062367
MMT00027755	Mak	17152	blue	-0.305401	0.33439	-0.791603	0.00215573	-0.471589	0.121683	-0.49569	0.101249
MMT00030541	Gdf10	14560	turquoise	0.304766	0.335447	0.577236	0.0493877	0.841279	0.000603856	0.356366	0.255534
MMT00065750	Pdxp	57028	turquoise	0.304207	0.336378	0.699628	0.0113194	0.596985	0.040422	0.468309	0.124658
MMT00047462	Ttc12	235330	turquoise	0.302886	0.338587	0.363219	0.245847	0.662965	0.0187835	0.462971	0.1296
MMT00040538	Zp1	22786	red	0.302147	0.339826	0.563684	0.0562949	0.519527	0.0834312	0.82761	0.000890783
MMT00006432	Il17re	57890	turquoise	0.298796	0.345474	0.583574	0.0463714	0.823024	0.00100746	0.515827	0.0860455
MMT00072526	Foxo6	329934	blue	-0.297176	0.348222	-0.484269	0.110623	-0.577022	0.0494919	-0.587025	0.0447849
MMT00079011	Gmip	78816	blue	0.296903	0.348686	0.786867	0.00239146	0.678932	0.0151902	0.457707	0.134598
MMT00043642	Ephb1	270190	red	-0.2963	0.349714	-0.379623	0.223555	-0.632548	0.0272935	-0.798084	0.0018624
MMT00065715	Snca	20617	red	0.29597	0.350276	0.397695	0.200454	0.389937	0.210183	0.540523	0.0696131
MMT00006013	Gjb3	14620	turquoise	-0.295015	0.351906	-0.531605	0.0752737	-0.683136	0.014335	-0.573243	0.0513575
MMT00038326	Osm	18413	red	0.294774	0.352318	0.411057	0.184355	0.362056	0.247476	0.581843	0.0471821
MMT00005957	Cpxm2	55987	turquoise	0.292662	0.355942	0.485571	0.109526	0.872334	0.00021474	0.385898	0.21536
MMT00031546	Cpa3	12873	turquoise	0.292091	0.356924	0.604584	0.0373025	0.759808	0.00413801	0.489927	0.10591
MMT00010083	Cyp4f15	106648	blue	-0.291751	0.357511	-0.548033	0.0650791	-0.453628	0.138554	-0.506981	0.0925197
MMT00014813	Ifit3	15959	red	0.288932	0.362389	0.54723	0.065554	0.476069	0.117696	0.624397	0.0299815
MMT00011298	Scx	20289	turquoise	0.286493	0.366636	0.306458	0.332633	0.853426	0.000414367	0.40997	0.185634
MMT00044934	Olfr729	258275	blue	-0.28591	0.367656	-0.486594	0.10867	-0.578195	0.0489229	-0.538217	0.0710474
MMT00028910	Cdh16	12556	blue	-0.283935	0.371119	-0.640895	0.0247256	-0.595774	0.0409353	-0.596711	0.0405377
MMT00029202	Rgs7	24012	turquoise	-0.283402	0.372057	-0.428536	0.164546	-0.825153	0.000951911	-0.39043	0.209557
MMT00021948	Sf3a2	20222	turquoise	0.282704	0.373288	0.666261	0.0179954	0.758044	0.00427833	0.827779	0.000886701
MMT00081002	Lair1	52855	red	-0.282646	0.373389	-0.438049	0.154356	-0.67208	0.0166638	-0.778958	0.00282848
MMT00001342	Sertad3	170742	blue	-0.282629	0.373419	-0.594736	0.0413793	-0.267501	0.400596	-0.521522	0.0820438
MMT00011746	Plcb1	18795	turquoise	-0.282511	0.373627	-0.607963	0.0359724	-0.783227	0.00258563	-0.473127	0.120304
MMT00079541	Pi15	94227	turquoise	-0.279998	0.378075	-0.698981	0.011428	-0.688363	0.0133218	-0.465513	0.127231
MMT00030601	Zfp287	170740	blue	0.279797	0.378432	0.599751	0.0392658	0.563295	0.0565028	0.232328	0.467454
MMT00008072	Cabp5	29865	blue	-0.2769	0.383596	-0.748276	0.0051218	-0.611232	0.0347181	-0.45343	0.138748
MMT00047418	Gpnmb	93695	turquoise	0.276005	0.385199	0.621325	0.0310425	0.874131	0.000200678	0.513273	0.0878823
MMT00061075	Arid3a	13496	turquoise	0.274026	0.388755	0.521107	0.0823311	0.729144	0.00713084	0.751826	0.00480197
MMT00037025	Bmper	73230	blue	0.273567	0.389582	0.698633	0.0114867	0.743953	0.0055328	0.371773	0.234066
MMT00064107	Mlana	77836	turquoise	0.273071	0.390475	0.544546	0.0671582	0.816512	0.00119301	0.406504	0.189748
MMT00055480	4930578C19Rik	75905	red	-0.272742	0.391071	-0.422149	0.171621	-0.503087	0.0954704	-0.822102	0.00103229
MMT00073226	Mycs	17870	blue	0.271443	0.39342	0.468231	0.124729	0.230796	0.47048	0.30659	0.332414
MMT00051144	Nid2	18074	turquoise	-0.270785	0.394613	-0.291389	0.358134	-0.623821	0.0301785	-0.533448	0.0740786
MMT00005022	1700025G04Rik	69399	turquoise	-0.268394	0.398965	-0.469249	0.123801	-0.665368	0.0182065	-0.628704	0.0285385
MMT00080309	Fabp1	14080	red	-0.267643	0.400335	-0.346393	0.270021	-0.429382	0.163623	-0.621284	0.0310566
MMT00060105	4933405O20Rik	243996	blue	0.267305	0.400954	0.387186	0.213702	0.397121	0.201164	0.318733	0.312612
MMT00024387	Krtap16-5	77918	red	-0.263832	0.407333	-0.568157	0.053945	-0.521664	0.0819457	-0.793112	0.00208447
MMT00068279	Fmod	14264	turquoise	0.261426	0.411782	0.562328	0.0570213	0.886037	0.000124663	0.388857	0.211561
MMT00039835	Olfr575	259118	turquoise	0.260021	0.414391	0.510776	0.0897029	0.520052	0.0830641	0.56995	0.0530223
MMT00073625	A230065H16Rik	380787	turquoise	0.258586	0.417064	0.58506	0.0456836	0.872755	0.000211376	0.395408	0.203293
MMT00034658	Omt2a	18379	red	-0.256242	0.421449	0.365115	0.243207	0.36797	0.239261	0.676618	0.0156765
MMT00015355	Arg1	11846	turquoise	0.252935	0.427674	0.284227	0.370607	0.603127	0.0378868	0.736941	0.00625151
MMT00031340	Nfasc	269116	turquoise	0.25194	0.429556	0.507638	0.0920279	0.91882	2.42e-05	0.51731	0.0849905
MMT00006677	Clic3	69454	turquoise	-0.251937	0.42956	-0.574871	0.0505476	-0.650063	0.0221124	-0.678862	0.0152047
MMT00028714	Dsc1	13505	red	-0.251266	0.430834	-0.748767	0.00507663	-0.597964	0.0400099	-0.791002	0.00218463
MMT00015542	Pkp1	18772	turquoise	0.250855	0.431613	0.608675	0.0356964	0.781591	0.00267672	0.890171	0.000104386
MMT00034980	4833427G06Rik	235345	blue	-0.250436	0.432407	-0.616973	0.032591	-0.538545	0.0708422	-0.377844	0.225911
MMT00027193	Arid2	77044	blue	-0.249419	0.434342	-0.742924	0.00563417	-0.499563	0.0981949	-0.649422	0.0222885
MMT00060429	Olfr1052	259012	turquoise	0.248981	0.435175	0.549069	0.0644702	0.819017	0.00111877	0.597201	0.0403308
MMT00045272	Etv4	18612	turquoise	0.247305	0.438373	0.415349	0.17936	0.890521	0.000102795	0.53169	0.0752177
MMT00042963	Flrt2	399558	red	-0.244087	0.444547	-0.475937	0.117812	-0.518509	0.0841446	-0.665601	0.0181513
MMT00010285	Pzp	11287	blue	0.24244	0.447723	0.806531	0.00152715	0.460843	0.131606	0.631436	0.0276494
MMT00019358	Tnr	21960	turquoise	0.242389	0.447821	0.423367	0.170257	0.749035	0.00505213	0.578489	0.0487809
MMT00054038	Casc1	320662	red	0.239103	0.45419	0.616529	0.0327523	0.574995	0.0504866	0.646254	0.0231726
MMT00012212	Slc25a30	67554	turquoise	0.236728	0.458819	0.662418	0.0189167	0.737954	0.0061436	0.592359	0.042409
MMT00060589	Glra1	14654	turquoise	0.235887	0.460465	0.61142	0.0346466	0.768776	0.00347767	0.807603	0.00148818
MMT00049221	Hic1	15248	turquoise	0.232933	0.466264	0.681893	0.014584	0.901402	6.21e-05	0.603067	0.0379112
MMT00011651	Acsl6	216739	turquoise	0.229285	0.47347	0.464808	0.127885	0.827546	0.000892329	0.587217	0.0446979
MMT00080352	Fdft1	14137	blue	-0.227804	0.476411	-0.498383	0.0991188	-0.311679	0.324035	-0.597432	0.0402335
MMT00045159	Cbs	12411	turquoise	-0.227452	0.477112	-0.629489	0.028281	-0.513542	0.0876874	-0.331595	0.292369
MMT00080603	Anxa8	11752	turquoise	-0.226183	0.479639	-0.583743	0.0462928	-0.793546	0.00206431	-0.611989	0.034432
MMT00059847	Ngb	64242	turquoise	0.225558	0.480887	0.576301	0.0498439	0.880345	0.000157496	0.631311	0.0276898
MMT00057404	Prss12	19142	blue	0.22457	0.482863	0.591613	0.0427359	0.308629	0.329042	0.517878	0.0845895
MMT00082420	Cd83	12522	blue	0.219339	0.493381	0.611992	0.0344308	0.453129	0.139044	0.478973	0.115158
MMT00029323	Htr1a	15550	turquoise	-0.218594	0.494886	-0.538332	0.0709752	-0.735454	0.00641259	-0.497621	0.0997189
MMT00033506	4632427E13Rik	68186	turquoise	-0.214673	0.502848	-0.440955	0.151325	-0.764463	0.00378438	-0.690844	0.01286
MMT00016680	Aamp	227290	turquoise	0.214654	0.502886	0.552366	0.0625584	0.859293	0.000341319	0.721845	0.00803523
MMT00033347	Ephb4	13846	red	-0.213699	0.504835	-0.666264	0.0179947	-0.595728	0.0409552	-0.771048	0.00332389
MMT00054409	Dbnl	13169	turquoise	0.21279	0.506691	0.604369	0.0373882	0.733269	0.00665481	0.779992	0.0027681
MMT00014906	Plg	18815	red	0.2126	0.50708	0.455448	0.13678	0.40439	0.192283	0.65293	0.0213383
MMT00081212	Slfn4	20558	blue	0.211895	0.508523	0.760363	0.00409459	0.414204	0.180684	0.680738	0.0148182
MMT00021150	Prosapip1	241638	blue	-0.207616	0.517319	-0.714786	0.00898879	-0.70136	0.0110326	-0.477959	0.11604
MMT00040554	Gap43	14432	red	-0.206793	0.519017	-0.46442	0.128247	-0.523515	0.080674	-0.861071	0.000321304
MMT00039721	Sult1e1	20860	red	0.205849	0.520971	0.447635	0.144503	0.471035	0.122182	0.550266	0.0637711
MMT00027378	Itih3	16426	turquoise	0.204565	0.52363	0.311829	0.32379	0.862412	0.000306814	0.397987	0.200094
MMT00020817	Grin1	14810	red	-0.195734	0.542083	-0.301898	0.340244	-0.521037	0.0823794	-0.808369	0.00146079
MMT00037697	Acr	11434	turquoise	-0.195353	0.542887	-0.619072	0.0318374	-0.729335	0.00710822	-0.493264	0.103194
MMT00080573	Rtn4rl1	237847	turquoise	0.192098	0.549759	0.594139	0.0416365	0.811963	0.00133746	0.669509	0.0172428
MMT00073568	Stk32a	269019	red	0.191684	0.550636	0.641857	0.0244416	0.471175	0.122056	0.722076	0.00800529
MMT00047935	Dner	227325	red	-0.188081	0.558291	-0.435343	0.157212	-0.679708	0.0150295	-0.786317	0.00242007
MMT00071365	Btk	12229	red	0.18386	0.567316	0.507688	0.0919904	0.79547	0.00197678	0.78204	0.00265153
MMT00048973	Mcpt4	17227	turquoise	0.179207	0.577331	0.557858	0.0594616	0.835069	0.000723576	0.530987	0.0756771
MMT00051253	Prps1	19139	red	-0.178888	0.578018	-0.562857	0.056737	-0.55327	0.0620411	-0.61284	0.0341123
MMT00011158	Syt10	54526	turquoise	0.177194	0.581683	0.548232	0.0649619	0.576567	0.049714	0.489265	0.106455
MMT00019155	Olfr420	258302	red	-0.177113	0.581859	-0.60654	0.0365282	-0.237674	0.456973	-0.679781	0.0150144
MMT00038396	Bglap2	12097	turquoise	0.176094	0.584068	0.468769	0.124238	0.606391	0.0365867	0.594558	0.0414557
MMT00021730	Sva	20939	red	-0.174725	0.58704	-0.33943	0.280411	-0.426654	0.166611	-0.819549	0.00110345
MMT00030380	Lyzl1	67328	red	-0.174229	0.588121	0.375249	0.229376	0.371236	0.234796	0.602001	0.0383429
MMT00027214	Kcnh8	211468	red	-0.169055	0.599417	-0.367663	0.239684	-0.353561	0.259562	-0.83545	0.000715751
MMT00029598	Uchl1	22223	turquoise	0.168277	0.601122	0.225169	0.481665	0.805656	0.00155956	0.406536	0.189709
MMT00078575	Olfr878	258794	red	0.167686	0.602421	0.330467	0.294115	0.443648	0.148551	0.737946	0.00614444
MMT00008784	Hspa8	15481	turquoise	0.166739	0.604501	0.43073	0.162159	0.780951	0.00271303	0.576929	0.0495374
MMT00053906	Hao1	15112	turquoise	-0.164981	0.60837	-0.365932	0.242074	-0.702961	0.0107723	-0.566054	0.0550412
MMT00026279	Tcp10a	21460	red	-0.163424	0.611806	-0.262664	0.40949	-0.498298	0.0991862	-0.72371	0.00779642
MMT00009101	Tead4	21679	red	-0.162615	0.613594	0.357414	0.254038	0.570236	0.0528764	0.625964	0.0294504
MMT00018843	1600029D21Rik	76509	blue	-0.162277	0.614341	-0.617831	0.0322813	-0.852131	0.000432001	-0.525404	0.0793904
MMT00009027	Socs3	12702	red	0.15903	0.621536	0.332196	0.291441	0.499691	0.0980951	0.714032	0.00909549
MMT00010142	Sfrp2	20319	blue	0.158013	0.623797	0.596829	0.0404876	0.752675	0.00472778	0.416618	0.177899
MMT00024017	Dclre1c	227525	red	0.157962	0.623911	0.692073	0.0126355	0.43412	0.158514	0.613247	0.0339605
MMT00048155	Slpi	20568	turquoise	-0.157369	0.62523	-0.287571	0.364755	-0.625815	0.0295006	-0.404996	0.191554
MMT00074585	Mfi2	30060	red	0.157291	0.625404	0.327706	0.29841	0.532369	0.0747766	0.703211	0.0107321
MMT00012342	Adcy1	216530	turquoise	0.155402	0.629616	0.460142	0.132271	0.889102	0.000109359	0.533647	0.0739506
MMT00048637	Crybb3	12962	turquoise	0.150315	0.641005	0.46538	0.127355	0.867155	0.000259607	0.520148	0.0829976
MMT00030465	Arhgap24	231532	red	-0.149254	0.643388	-0.472123	0.121203	-0.599199	0.0394945	-0.708762	0.00986735
MMT00053102	Cacna2d3	12294	turquoise	0.147489	0.647363	0.450559	0.141581	0.871226	0.000223787	0.431718	0.161091
MMT00015131	Napb	17957	red	0.147433	0.647489	0.425591	0.167784	0.634192	0.0267731	0.725182	0.00761165
MMT00032657	Npy	109648	red	0.144926	0.653148	0.529472	0.0766722	0.456797	0.135474	0.682468	0.0144685
MMT00037979	Upk1b	22268	turquoise	-0.143416	0.656564	-0.360323	0.249915	-0.551796	0.0628859	-0.350598	0.263857
MMT00044361	Plekhb2	226971	turquoise	0.140005	0.664304	0.334727	0.287555	0.843917	0.00055793	0.568356	0.053842
MMT00000570	Ier3	15937	turquoise	0.138165	0.668492	0.345002	0.272078	0.645466	0.0233965	0.491896	0.104302
MMT00025515	Crym	12971	turquoise	-0.137901	0.669094	-0.238135	0.456074	-0.622905	0.0304936	-0.491227	0.104846
MMT00047914	Coq3	230027	turquoise	0.134332	0.677243	0.47401	0.119517	0.752043	0.00478289	0.464403	0.128262
MMT00046606	Slamf1	27218	red	-0.132997	0.680301	-0.483682	0.111119	-0.59214	0.0425048	-0.605336	0.0370036
MMT00018068	Il6	16193	red	0.132874	0.680581	0.395557	0.203106	0.350743	0.263646	0.770162	0.00338322
MMT00011028	Adamts7	108153	red	-0.132144	0.682256	0.354341	0.258438	0.297819	0.34713	0.780787	0.00272238
MMT00003243	Lrrc4b	272381	blue	-0.13178	0.68309	-0.523709	0.0805413	-0.440343	0.15196	-0.658155	0.0199782
MMT00031882	4933402N03Rik	233918	turquoise	-0.131044	0.684781	-0.46081	0.131637	-0.638548	0.0254293	-0.507566	0.0920816
MMT00042546	Olfr686	259072	red	-0.129844	0.687538	-0.517937	0.0845475	-0.351523	0.262512	-0.803143	0.00165549
MMT00077072	Olfr630	259102	blue	0.129491	0.68835	0.302427	0.339356	0.430457	0.162455	0.417746	0.176607
MMT00082175	Cdh3	12560	turquoise	-0.127851	0.692123	-0.584627	0.0458832	-0.638984	0.0252974	-0.562331	0.0570195
MMT00044065	Chek2	50883	red	0.125609	0.697294	0.386034	0.215184	0.346689	0.269584	0.81372	0.00128014
MMT00023604	Fbxo16	50759	red	-0.125346	0.697903	-0.404346	0.192336	-0.414904	0.179874	-0.780819	0.0027206
MMT00006881	Pprc1	226169	blue	-0.120802	0.708422	-0.684266	0.0141112	-0.296644	0.349127	-0.565917	0.0551128
MMT00078782	Mpp2	50997	turquoise	0.120362	0.709443	0.534443	0.073439	0.607136	0.0362947	0.639591	0.025115
MMT00081498	Rab25	53868	red	-0.119378	0.71173	-0.555951	0.0605243	-0.554756	0.0611975	-0.781442	0.00268517
MMT00073254	Tnfaip2	21928	turquoise	0.117781	0.715444	0.440305	0.151999	0.75267	0.00472818	0.506737	0.0927023
MMT00065883	Foxn2	14236	turquoise	-0.114729	0.722555	-0.382147	0.220236	-0.508818	0.0911487	-0.671709	0.0167465
MMT00036166	Aqp9	64008	red	-0.11099	0.731297	-0.40929	0.186436	-0.433922	0.158725	-0.785312	0.00247303
MMT00015930	Hyal4	77042	red	0.10892	0.736149	0.39361	0.205542	0.365062	0.24328	0.559956	0.0583071
MMT00018127	Ntn1	18208	blue	-0.108823	0.736377	-0.688583	0.0132803	-0.403256	0.193653	-0.425258	0.168153
MMT00033612	Epb4.2	13828	red	-0.107971	0.738376	0.41634	0.178219	0.621498	0.0309819	0.703529	0.010681
MMT00068444	Prnd	26434	turquoise	-0.106827	0.741066	0.295636	0.350845	0.628919	0.0284678	0.783003	0.002598
MMT00000968	Nrxn3	18191	red	-0.103184	0.749641	0.377949	0.225771	0.353541	0.259591	0.769075	0.00345714
MMT00031654	Hs6st1	50785	blue	0.10059	0.755764	0.686741	0.0136304	0.727761	0.00729601	0.47813	0.115891
MMT00043257	Olfr716	258597	red	-0.100251	0.756564	-0.18409	0.566823	-0.583709	0.0463086	-0.638807	0.0253509
MMT00061961	4930583H14Rik	67749	red	-0.100072	0.756988	-0.331866	0.291951	-0.610403	0.0350329	-0.830779	0.00081645
MMT00078249	Pcdhb6	93877	turquoise	0.0993853	0.758612	0.464519	0.128154	0.81595	0.00121018	0.658648	0.0198534
MMT00017138	Myo3a	214682	turquoise	-0.0987699	0.760068	-0.523485	0.0806942	-0.63566	0.0263146	-0.583804	0.0462644
MMT00039970	Pak1	18479	turquoise	0.0894783	0.782133	0.485178	0.109856	0.855504	0.000387224	0.480703	0.113664
MMT00079824	Olfr645	258247	red	-0.0862443	0.789849	-0.642916	0.0241315	-0.459323	0.133051	-0.725799	0.0075353
MMT00059926	4930470P17Rik	67637	red	-0.0848739	0.793124	-0.494295	0.102364	-0.583068	0.0466073	-0.712103	0.00937251
MMT00026172	4930485B16Rik	74958	red	0.0828156	0.798048	-0.437671	0.154752	-0.526294	0.0787901	-0.763317	0.00386924
MMT00028197	4930438A08Rik	73988	turquoise	0.0778791	0.809886	0.244687	0.443393	0.6439	0.0238457	0.573317	0.0513202
MMT00029165	Insm1	53626	red	0.077458	0.810897	0.189134	0.556051	0.46208	0.130438	0.715826	0.00884328
MMT00019490	Folh1	53320	turquoise	-0.0760863	0.814194	0.415987	0.178625	0.694875	0.0121348	0.609704	0.0353003
MMT00039799	Vax1	22326	red	0.0740908	0.818995	0.576954	0.0495251	0.634096	0.0268032	0.861321	0.000318562
MMT00046994	Fads1	76267	turquoise	0.0732648	0.820984	0.436142	0.156365	0.767172	0.00358945	0.708119	0.00996483
MMT00031423	Gypa	14934	red	0.073018	0.821579	0.653959	0.0210653	0.426965	0.166269	0.627916	0.0287988
MMT00071500	Mx2	17858	turquoise	0.0725588	0.822685	0.62419	0.0300523	0.798441	0.00184717	0.590564	0.0431983
MMT00011648	Rem2	140743	blue	0.0725337	0.822745	-0.568955	0.0535332	-0.5722	0.0518809	-0.634519	0.0266706
MMT00024553	Cps1	227231	turquoise	-0.0724903	0.82285	-0.555795	0.0606121	-0.647144	0.0229217	-0.383778	0.218108
MMT00000131	Cntn6	53870	turquoise	0.0705662	0.827489	0.444029	0.148161	0.762923	0.00389875	0.6699	0.0171538
MMT00038397	Cyp19a1	13075	red	0.0642824	0.842673	-0.360206	0.250079	-0.329523	0.295579	-0.735288	0.00643078
MMT00035724	Tcf21	21412	red	0.0564678	0.861625	-0.484323	0.110577	-0.580219	0.0479516	-0.752727	0.00472322
MMT00018823	Zfp454	237758	red	-0.0555598	0.863832	-0.294592	0.352629	-0.510255	0.0900863	-0.797205	0.00190026
MMT00072394	Trpc4	22066	turquoise	-0.0546169	0.866124	0.316805	0.315712	0.645343	0.0234315	0.702819	0.0107953
MMT00034019	Ptgs2	19225	turquoise	0.0522293	0.871933	0.310089	0.32664	0.598147	0.0399333	0.491592	0.104549
MMT00012399	Olfr463	258408	red	-0.048751	0.880406	0.261931	0.410847	0.478577	0.115502	0.792363	0.00211962
MMT00063859	Ctps2	55936	red	-0.0464294	0.886068	0.342003	0.276545	0.442695	0.149529	0.737663	0.00617448
MMT00014082	Slc6a18	22598	blue	-0.0460831	0.886913	-0.457934	0.134379	-0.526003	0.078986	-0.345233	0.271736
MMT00041317	Abcg8	67470	red	0.0438479	0.892369	0.379405	0.223843	0.190756	0.552604	0.753706	0.00463881
MMT00017475	Atp8a2	50769	turquoise	-0.0404486	0.900675	-0.22891	0.474215	-0.549213	0.0643856	-0.722548	0.00794455
MMT00027778	Olfr803	258547	red	-0.0350703	0.913836	0.336244	0.285239	0.0307485	0.924425	0.595513	0.0410467
MMT00046600	Scn3b	235281	turquoise	0.0332814	0.918217	-0.511121	0.0894501	-0.644231	0.0237502	-0.615541	0.0331126
MMT00017146	Akr1c6	83702	red	0.0326545	0.919754	-0.585429	0.0455138	-0.362872	0.246333	-0.753021	0.00469778
MMT00067082	Chrna4	11438	blue	-0.0247875	0.939049	-0.637274	0.025817	-0.471351	0.121897	-0.637476	0.0257554
MMT00059280	Coch	12810	turquoise	-0.024736	0.939176	0.45838	0.133952	0.689724	0.013067	0.466661	0.126171
MMT00058633	Olfr2	18317	red	0.0225856	0.944456	0.294285	0.353155	0.559285	0.0586748	0.692134	0.0126245
MMT00012502	Ass1	11898	turquoise	0.0223488	0.945038	0.51164	0.0890704	0.87099	0.000225751	0.622035	0.0307947
MMT00020204	Stard8	236920	red	-0.0192474	0.952657	0.424821	0.168638	0.516253	0.0857413	0.755335	0.00450091
MMT00035299	Galnt3	14425	red	0.0152415	0.962503	-0.258059	0.418048	-0.382572	0.21968	-0.695498	0.0120256
MMT00049565	Olfr1272	258982	red	0.0136746	0.966356	0.281333	0.37571	0.170283	0.596729	0.567436	0.0543192
MMT00038241	1700007B14Rik	71831	red	0.0127506	0.968628	0.397818	0.200302	0.603687	0.0376616	0.612505	0.0342381
