# Supplementary material for: Co-expression network analysis identified hub genes critical to triglyceride and free fatty acid metabolism as key regulators of age-related vascular dysfunction in mice
Source: Aging (Albany NY). 2019 Sep 12;11(18):7620–38. doi: 10.18632/aging.102275 (PMC6781998; doi:10.18632/aging.102275)
Supplement: Supplementary Table 13 [file aging-11-102275-s002.xlsx]

## Sheet: Sheet1
Supplementary Table 13. Cytoscape-format node list for the turquoise-blue modules.
nodeName	altName	nodeAttr.nodesPresent...
MMT00034448	Tnmd	blue
MMT00063550	Fbxo32	blue
MMT00037979	Upk1b	turquoise
MMT00027193	Arid2	blue
MMT00018843	1600029D21Rik	blue
MMT00059280	Coch	turquoise
MMT00063533	Ms4a4b	blue
MMT00010083	Cyp4f15	blue
MMT00033205	Cst7	blue
MMT00012362	Fcna	turquoise
MMT00079177	Card14	turquoise
MMT00000858	Lyl1	blue
MMT00048973	Mcpt4	turquoise
MMT00018127	Ntn1	blue
MMT00012338	Ptgfrn	blue
MMT00009429	Serpinb13	blue
MMT00012971	Mgst2	blue
MMT00015542	Pkp1	turquoise
MMT00027774	Kcne1l	turquoise
MMT00067891	Folr2	blue
MMT00082385	Nme4	blue
MMT00031654	Hs6st1	blue
MMT00030404	C1qa	blue
MMT00081212	Slfn4	blue
MMT00030541	Gdf10	turquoise
MMT00011648	Rem2	blue
MMT00018095	Gk2	blue
MMT00012342	Adcy1	turquoise
MMT00082420	Cd83	blue
MMT00080603	Anxa8	turquoise
MMT00068279	Fmod	turquoise
MMT00059097	Sc4mol	blue
MMT00072505	Abp1	blue
MMT00031546	Cpa3	turquoise
MMT00059295	Cab39	blue
MMT00045956	Il10ra	blue
MMT00030162	Trpv5	blue
MMT00079309	Exo1	blue
MMT00079541	Pi15	turquoise
MMT00025100	Sppl3	blue
MMT00044688	Akr1c12	blue
MMT00019015	Dpys	blue
MMT00034019	Ptgs2	turquoise
MMT00055921	Retnla	turquoise
MMT00063663	Rgs1	turquoise
MMT00056355	Mill1	blue
MMT00023471	Tyrobp	blue
MMT00073282	Itgb2	blue
MMT00025515	Crym	turquoise
MMT00044207	Kctd16	blue
MMT00080429	Slc15a2	blue
MMT00037697	Acr	turquoise
MMT00039835	Olfr575	turquoise
MMT00079011	Gmip	blue
MMT00017876	H2-DMb1	blue
MMT00011746	Plcb1	turquoise
MMT00000570	Ier3	turquoise
MMT00028633	Frzb	blue
MMT00028910	Cdh16	blue
MMT00055270	Ifitm6	blue
MMT00060105	4933405O20Rik	blue
MMT00015355	Arg1	turquoise
MMT00017475	Atp8a2	turquoise
MMT00029403	2010107G23Rik	blue
MMT00051144	Nid2	turquoise
MMT00018370	Csf3	blue
MMT00011158	Syt10	turquoise
MMT00067646	Ccl24	turquoise
MMT00058927	3110009E18Rik	blue
MMT00058358	1700093K21Rik	blue
MMT00034980	4833427G06Rik	blue
MMT00005022	1700025G04Rik	turquoise
MMT00042972	Aox1	blue
MMT00014701	Cdon	blue
MMT00053670	Chn1	blue
MMT00078723	Mmp2	blue
MMT00049421	Cd79b	blue
MMT00082376	Scn1b	turquoise
MMT00012907	Rest	blue
MMT00067789	Svs5	turquoise
MMT00069681	Tnnc2	blue
MMT00012212	Slc25a30	turquoise
MMT00049221	Hic1	turquoise
MMT00046994	Fads1	turquoise
MMT00080956	Doc2g	blue
MMT00054089	Itgb7	blue
MMT00073254	Tnfaip2	turquoise
MMT00014082	Slc6a18	blue
MMT00022926	Myoc	turquoise
MMT00047914	Coq3	turquoise
MMT00011298	Scx	turquoise
MMT00011651	Acsl6	turquoise
MMT00070222	Rasa4	turquoise
MMT00082736	4931428L18Rik	turquoise
MMT00059245	Rarres1	turquoise
MMT00078249	Pcdhb6	turquoise
MMT00002362	Fmnl1	blue
MMT00067186	Irf7	blue
MMT00026709	Vnn1	blue
MMT00005510	Ahsg	turquoise
MMT00027892	Mmp20	turquoise
MMT00049862	Pgc	blue
MMT00070618	Npl	blue
MMT00014165	Klhl6	blue
MMT00013511	Olfr1504	blue
MMT00047418	Gpnmb	turquoise
MMT00062400	Dpp7	turquoise
MMT00060589	Glra1	turquoise
MMT00034690	Dok2	blue
MMT00048836	Ear11	turquoise
MMT00060071	Hpgd	blue
MMT00015239	Gdap1	turquoise
MMT00033228	Ly86	blue
MMT00078239	Homer3	turquoise
MMT00009738	Ropn1	blue
MMT00027755	Mak	blue
MMT00055430	S100a3	blue
MMT00063470	Agxt	turquoise
MMT00021096	H2-DMa	blue
MMT00057404	Prss12	blue
MMT00037025	Bmper	blue
MMT00030601	Zfp287	blue
MMT00021946	Rfx4	turquoise
MMT00053102	Cacna2d3	turquoise
MMT00047610	Cst9	turquoise
MMT00057059	P2rx7	turquoise
MMT00036564	Pik3cg	blue
MMT00071500	Mx2	turquoise
MMT00072394	Trpc4	turquoise
MMT00010142	Sfrp2	blue
MMT00076717	Diap3	blue
MMT00036250	Ankrd1	turquoise
MMT00008784	Hspa8	turquoise
MMT00080352	Fdft1	blue
MMT00075488	Slc35d1	blue
MMT00022062	Col13a1	blue
MMT00037307	Cpa4	blue
MMT00054240	Sox11	blue
MMT00054409	Dbnl	turquoise
MMT00043465	1700011F03Rik	blue
MMT00069620	Nova1	blue
MMT00031333	Pcdhb13	blue
MMT00079156	Ms4a4d	blue
MMT00047748	Cdc6	blue
MMT00044361	Plekhb2	turquoise
MMT00015096	Slc6a15	turquoise
MMT00060215	Pln	blue
MMT00024264	Alms1	blue
MMT00029598	Uchl1	turquoise
MMT00019749	Dach2	blue
MMT00033072	Rnf103	blue
MMT00065768	Igfbp4	turquoise
MMT00051022	Fgd2	blue
MMT00076599	Ece2	turquoise
MMT00069165	Fbln5	turquoise
MMT00060813	Sdc3	blue
MMT00077777	4932414N04Rik	turquoise
MMT00081993	Col8a1	blue
MMT00026998	2210020M01Rik	blue
MMT00030373	Crlf1	turquoise
MMT00065883	Foxn2	turquoise
MMT00067082	Chrna4	blue
MMT00013974	Drd1a	blue
MMT00036723	Slc9a9	blue
MMT00060597	Bpgm	blue
MMT00000131	Cntn6	turquoise
MMT00020772	Ctdsp2	turquoise
MMT00050965	Slc15a3	blue
MMT00048155	Slpi	turquoise
MMT00053034	Kif1a	turquoise
MMT00036955	Jrk	blue
MMT00016676	Kcnk5	blue
MMT00005957	Cpxm2	turquoise
MMT00025067	Rgs18	blue
MMT00056571	BC026585	turquoise
MMT00038375	AW146020	blue
MMT00012541	Lcp1	blue
MMT00068584	Bid	turquoise
MMT00068509	Oit3	blue
MMT00005653	Ccr5	blue
MMT00072526	Foxo6	blue
MMT00016365	Sncaip	blue
MMT00054808	Csf1r	blue
MMT00006988	Olig1	blue
MMT00040864	Chst2	blue
MMT00065750	Pdxp	turquoise
MMT00029323	Htr1a	turquoise
MMT00047171	Icam1	turquoise
MMT00037375	Skiv2l	turquoise
MMT00011577	Il28ra	turquoise
MMT00016680	Aamp	turquoise
MMT00040374	Trim9	turquoise
MMT00000608	Ccl5	blue
MMT00049364	Kbtbd10	blue
MMT00039970	Pak1	turquoise
MMT00029545	Tob2	blue
MMT00001342	Sertad3	blue
MMT00031882	4933402N03Rik	turquoise
MMT00010449	Cacng5	turquoise
MMT00005231	Tmie	blue
MMT00080573	Rtn4rl1	turquoise
MMT00005428	D430019H16Rik	turquoise
MMT00018141	Pik3cd	blue
MMT00061075	Arid3a	turquoise
MMT00000368	Spry1	turquoise
MMT00080083	Wt1	turquoise
MMT00064107	Mlana	turquoise
MMT00003243	Lrrc4b	blue
MMT00010362	Grb10	blue
MMT00077072	Olfr630	blue
MMT00045272	Etv4	turquoise
MMT00036749	1190002N15Rik	blue
MMT00079222	Cntn1	turquoise
MMT00077375	Cd68	blue
MMT00080633	Cxcr6	turquoise
MMT00037447	Trem2	blue
MMT00029329	Ppfia4	blue
MMT00019490	Folh1	turquoise
MMT00073624	Hcrtr1	blue
MMT00015288	1700015G11Rik	turquoise
MMT00079572	9430091E24Rik	blue
MMT00043771	Plek	blue
MMT00013893	Cyp2s1	turquoise
MMT00072852	Bai2	turquoise
MMT00073226	Mycs	blue
MMT00064623	Abcc6	turquoise
MMT00077956	Ltbp2	blue
MMT00000777	F3	turquoise
MMT00031183	Mdk	blue
MMT00017992	Gsg1	blue
MMT00053446	Ptges	blue
MMT00019358	Tnr	turquoise
MMT00008854	H2-Q7	blue
MMT00006677	Clic3	turquoise
MMT00017740	Vps52	blue
MMT00001955	Olfr1265	turquoise
MMT00009954	Olfr470	blue
MMT00060429	Olfr1052	turquoise
MMT00025169	Insrr	turquoise
MMT00048637	Crybb3	turquoise
MMT00070418	Adra2c	turquoise
MMT00041887	Hcst	blue
MMT00005482	Ibsp	turquoise
MMT00054422	Mrc1	blue
MMT00020142	Adam34	blue
MMT00006881	Pprc1	blue
MMT00078815	Ptprf	turquoise
MMT00008186	Ubtf	blue
MMT00047462	Ttc12	turquoise
MMT00027378	Itih3	turquoise
MMT00016989	Ifi47	blue
MMT00024553	Cps1	turquoise
MMT00001160	1500009C09Rik	blue
MMT00016783	Podn	turquoise
MMT00046600	Scn3b	turquoise
MMT00022777	C530028O21Rik	blue
MMT00012502	Ass1	turquoise
MMT00031281	Il3ra	turquoise
MMT00004123	Cdkn2a	blue
MMT00068712	Fcgr1	blue
MMT00010412	Serpina1d	turquoise
MMT00056703	Serpinb6b	turquoise
MMT00064871	Oxtr	blue
MMT00007847	Gal3st1	blue
MMT00006013	Gjb3	turquoise
MMT00029984	Sema5a	blue
MMT00026736	Olfr24	blue
MMT00006432	Il17re	turquoise
MMT00021150	Prosapip1	blue
MMT00006067	Adra2a	blue
MMT00072686	Enpp5	turquoise
MMT00033710	Muc4	blue
MMT00044934	Olfr729	blue
MMT00030138	Clcn1	blue
MMT00008072	Cabp5	blue
MMT00045480	Gyk	turquoise
MMT00069832	Mbd2	turquoise
MMT00015631	Atp1a3	blue
MMT00022494	Slc22a18	turquoise
MMT00037781	Gas7	blue
MMT00080177	Gzmk	turquoise
MMT00028683	Msx2	blue
MMT00048340	Efemp1	turquoise
MMT00080684	BC013712	blue
MMT00067079	Fetub	turquoise
MMT00001806	Cd84	blue
MMT00022586	Apod	blue
MMT00026944	Igfbp2	turquoise
MMT00036455	G6pc2	blue
MMT00016669	Gp49a	blue
MMT00002249	Ank1	turquoise
MMT00059847	Ngb	turquoise
MMT00015950	Cnksr2	blue
MMT00019014	Yars	turquoise
MMT00035020	Prkar1b	turquoise
MMT00049504	Slc6a4	turquoise
MMT00074183	Wrb	blue
MMT00073625	A230065H16Rik	turquoise
MMT00045159	Cbs	turquoise
MMT00074216	Cyp2b19	blue
MMT00068444	Prnd	turquoise
MMT00008639	Olfr975	blue
MMT00004176	Cybb	blue
MMT00044885	Capn9	turquoise
MMT00028197	4930438A08Rik	turquoise
MMT00006698	Olfr667	turquoise
MMT00029202	Rgs7	turquoise
MMT00071233	Pou2af1	blue
MMT00017138	Myo3a	turquoise
MMT00009424	Traf2	blue
MMT00010285	Pzp	blue
MMT00021948	Sf3a2	turquoise
MMT00078069	1810010H24Rik	blue
MMT00037199	Adcy9	blue
MMT00038396	Bglap2	turquoise
MMT00006323	Ache	turquoise
MMT00033506	4632427E13Rik	turquoise
MMT00022784	Usp18	blue
MMT00003475	Alg12	blue
MMT00026973	Mx1	blue
MMT00020871	Fcer1a	turquoise
MMT00081348	Myo1f	blue
MMT00081727	Tbc1d12	blue
MMT00018994	Akp3	blue
MMT00043936	Cd48	blue
MMT00018014	Pard6g	blue
MMT00058269	Tas2r105	blue
MMT00031488	Sorl1	blue
MMT00046154	9330182L06Rik	turquoise
MMT00032750	Atp1b4	turquoise
MMT00031340	Nfasc	turquoise
MMT00056668	Ccl28	blue
MMT00069732	Calb1	turquoise
MMT00049304	Cyp3a13	blue
MMT00037740	Ptpro	blue
MMT00078782	Mpp2	turquoise
MMT00048579	Nrap	turquoise
MMT00032770	1700065I16Rik	blue
MMT00026943	Rorb	blue
MMT00014106	4933400C23	blue
MMT00015455	4930550C17Rik	blue
MMT00036143	Glipr2	turquoise
MMT00000760	Tcrb-J	turquoise
MMT00071842	Prrx2	blue
MMT00007073	Lrrc2	blue
MMT00038361	Tgfbr3	turquoise
MMT00035279	Fez1	turquoise
MMT00053906	Hao1	turquoise
MMT00061212	Ccnd1	turquoise
MMT00082175	Cdh3	turquoise
MMT00070310	Kctd12	turquoise
MMT00046734	Sardh	blue
MMT00038451	4930417G10Rik	blue
MMT00020883	Kit	blue
