# Supplementary material for: Co-expression network analysis identified hub genes critical to triglyceride and free fatty acid metabolism as key regulators of age-related vascular dysfunction in mice
Source: Aging (Albany NY). 2019 Sep 12;11(18):7620–38. doi: 10.18632/aging.102275 (PMC6781998; doi:10.18632/aging.102275)
Supplement: Supplementary Table 14 [file aging-11-102275-s021.xlsx]

## Sheet: Sheet1
Supplementary Table 14. Cytoscape-format edge list for the turquoise-blue modules.
fromNode	toNode	weight	direction	fromAltName	toAltName
MMT00034448	MMT00063550	0.0849934	undirected	Tnmd	Fbxo32
MMT00034448	MMT00037979	0.0530843	undirected	Tnmd	Upk1b
MMT00034448	MMT00027193	0.0515395	undirected	Tnmd	Arid2
MMT00034448	MMT00018843	0.176643	undirected	Tnmd	1600029D21Rik
MMT00034448	MMT00059280	0.0955048	undirected	Tnmd	Coch
MMT00034448	MMT00063533	0.10922	undirected	Tnmd	Ms4a4b
MMT00034448	MMT00010083	0.0447606	undirected	Tnmd	Cyp4f15
MMT00034448	MMT00033205	0.0306345	undirected	Tnmd	Cst7
MMT00034448	MMT00012362	0.0612969	undirected	Tnmd	Fcna
MMT00034448	MMT00079177	0.0949568	undirected	Tnmd	Card14
MMT00034448	MMT00000858	0.034633	undirected	Tnmd	Lyl1
MMT00034448	MMT00048973	0.0824243	undirected	Tnmd	Mcpt4
MMT00034448	MMT00018127	0.0528222	undirected	Tnmd	Ntn1
MMT00034448	MMT00012338	0.0697275	undirected	Tnmd	Ptgfrn
MMT00034448	MMT00009429	0.177221	undirected	Tnmd	Serpinb13
MMT00034448	MMT00012971	0.122089	undirected	Tnmd	Mgst2
MMT00034448	MMT00015542	0.0456285	undirected	Tnmd	Pkp1
MMT00034448	MMT00027774	0.048162	undirected	Tnmd	Kcne1l
MMT00034448	MMT00067891	0.0840301	undirected	Tnmd	Folr2
MMT00034448	MMT00082385	0.130226	undirected	Tnmd	Nme4
MMT00034448	MMT00031654	0.162799	undirected	Tnmd	Hs6st1
MMT00034448	MMT00030404	0.105473	undirected	Tnmd	C1qa
MMT00034448	MMT00081212	0.0407121	undirected	Tnmd	Slfn4
MMT00034448	MMT00030541	0.143268	undirected	Tnmd	Gdf10
MMT00034448	MMT00011648	0.0490301	undirected	Tnmd	Rem2
MMT00034448	MMT00018095	0.0557928	undirected	Tnmd	Gk2
MMT00034448	MMT00012342	0.103308	undirected	Tnmd	Adcy1
MMT00034448	MMT00082420	0.0829409	undirected	Tnmd	Cd83
MMT00034448	MMT00080603	0.0756146	undirected	Tnmd	Anxa8
MMT00034448	MMT00068279	0.189722	undirected	Tnmd	Fmod
MMT00034448	MMT00059097	0.0526781	undirected	Tnmd	Sc4mol
MMT00034448	MMT00072505	0.0342027	undirected	Tnmd	Abp1
MMT00034448	MMT00031546	0.0534096	undirected	Tnmd	Cpa3
MMT00034448	MMT00059295	0.0656509	undirected	Tnmd	Cab39
MMT00034448	MMT00045956	0.106497	undirected	Tnmd	Il10ra
MMT00034448	MMT00079309	0.0332914	undirected	Tnmd	Exo1
MMT00034448	MMT00079541	0.102514	undirected	Tnmd	Pi15
MMT00034448	MMT00025100	0.0313196	undirected	Tnmd	Sppl3
MMT00034448	MMT00044688	0.0202775	undirected	Tnmd	Akr1c12
MMT00034448	MMT00019015	0.0676479	undirected	Tnmd	Dpys
MMT00034448	MMT00034019	0.0685237	undirected	Tnmd	Ptgs2
MMT00034448	MMT00055921	0.0663591	undirected	Tnmd	Retnla
MMT00034448	MMT00063663	0.0932528	undirected	Tnmd	Rgs1
MMT00034448	MMT00056355	0.0371977	undirected	Tnmd	Mill1
MMT00034448	MMT00023471	0.0632949	undirected	Tnmd	Tyrobp
MMT00034448	MMT00073282	0.039277	undirected	Tnmd	Itgb2
MMT00034448	MMT00025515	0.0264575	undirected	Tnmd	Crym
MMT00034448	MMT00044207	0.0317022	undirected	Tnmd	Kctd16
MMT00034448	MMT00080429	0.0553391	undirected	Tnmd	Slc15a2
MMT00034448	MMT00037697	0.083147	undirected	Tnmd	Acr
MMT00034448	MMT00039835	0.0237163	undirected	Tnmd	Olfr575
MMT00034448	MMT00079011	0.151837	undirected	Tnmd	Gmip
MMT00034448	MMT00017876	0.158653	undirected	Tnmd	H2-DMb1
MMT00034448	MMT00011746	0.0996524	undirected	Tnmd	Plcb1
MMT00034448	MMT00000570	0.0879973	undirected	Tnmd	Ier3
MMT00034448	MMT00028633	0.200726	undirected	Tnmd	Frzb
MMT00034448	MMT00028910	0.11901	undirected	Tnmd	Cdh16
MMT00034448	MMT00055270	0.060059	undirected	Tnmd	Ifitm6
MMT00034448	MMT00017475	0.0335781	undirected	Tnmd	Atp8a2
MMT00034448	MMT00029403	0.0672052	undirected	Tnmd	2010107G23Rik
MMT00034448	MMT00051144	0.0215335	undirected	Tnmd	Nid2
MMT00034448	MMT00018370	0.0426382	undirected	Tnmd	Csf3
MMT00034448	MMT00011158	0.0389145	undirected	Tnmd	Syt10
MMT00034448	MMT00067646	0.039499	undirected	Tnmd	Ccl24
MMT00034448	MMT00058927	0.0262889	undirected	Tnmd	3110009E18Rik
MMT00034448	MMT00058358	0.0339152	undirected	Tnmd	1700093K21Rik
MMT00034448	MMT00034980	0.0382229	undirected	Tnmd	4833427G06Rik
MMT00034448	MMT00005022	0.0795374	undirected	Tnmd	1700025G04Rik
MMT00034448	MMT00042972	0.0967971	undirected	Tnmd	Aox1
MMT00034448	MMT00014701	0.0595712	undirected	Tnmd	Cdon
MMT00034448	MMT00053670	0.141148	undirected	Tnmd	Chn1
MMT00034448	MMT00078723	0.0867007	undirected	Tnmd	Mmp2
MMT00034448	MMT00049421	0.0621273	undirected	Tnmd	Cd79b
MMT00034448	MMT00082376	0.109108	undirected	Tnmd	Scn1b
MMT00034448	MMT00012907	0.0360383	undirected	Tnmd	Rest
MMT00034448	MMT00067789	0.0715542	undirected	Tnmd	Svs5
MMT00034448	MMT00069681	0.027881	undirected	Tnmd	Tnnc2
MMT00034448	MMT00012212	0.0542721	undirected	Tnmd	Slc25a30
MMT00034448	MMT00049221	0.149935	undirected	Tnmd	Hic1
MMT00034448	MMT00046994	0.0826878	undirected	Tnmd	Fads1
MMT00034448	MMT00080956	0.0492571	undirected	Tnmd	Doc2g
MMT00034448	MMT00054089	0.0845313	undirected	Tnmd	Itgb7
MMT00034448	MMT00073254	0.0741767	undirected	Tnmd	Tnfaip2
MMT00034448	MMT00014082	0.0314422	undirected	Tnmd	Slc6a18
MMT00034448	MMT00022926	0.184299	undirected	Tnmd	Myoc
MMT00034448	MMT00047914	0.0628306	undirected	Tnmd	Coq3
MMT00034448	MMT00011298	0.0819219	undirected	Tnmd	Scx
MMT00034448	MMT00011651	0.0992353	undirected	Tnmd	Acsl6
MMT00034448	MMT00070222	0.147111	undirected	Tnmd	Rasa4
MMT00034448	MMT00082736	0.0590864	undirected	Tnmd	4931428L18Rik
MMT00034448	MMT00059245	0.10837	undirected	Tnmd	Rarres1
MMT00034448	MMT00078249	0.0771525	undirected	Tnmd	Pcdhb6
MMT00034448	MMT00002362	0.0305806	undirected	Tnmd	Fmnl1
MMT00034448	MMT00067186	0.0208082	undirected	Tnmd	Irf7
MMT00034448	MMT00026709	0.12627	undirected	Tnmd	Vnn1
MMT00034448	MMT00005510	0.0970086	undirected	Tnmd	Ahsg
MMT00034448	MMT00027892	0.0419249	undirected	Tnmd	Mmp20
MMT00034448	MMT00049862	0.021114	undirected	Tnmd	Pgc
MMT00034448	MMT00070618	0.0423888	undirected	Tnmd	Npl
MMT00034448	MMT00014165	0.074959	undirected	Tnmd	Klhl6
MMT00034448	MMT00013511	0.0501675	undirected	Tnmd	Olfr1504
MMT00034448	MMT00047418	0.152173	undirected	Tnmd	Gpnmb
MMT00034448	MMT00062400	0.0690192	undirected	Tnmd	Dpp7
MMT00034448	MMT00060589	0.059849	undirected	Tnmd	Glra1
MMT00034448	MMT00034690	0.0858816	undirected	Tnmd	Dok2
MMT00034448	MMT00048836	0.0520704	undirected	Tnmd	Ear11
MMT00034448	MMT00060071	0.0329332	undirected	Tnmd	Hpgd
MMT00034448	MMT00015239	0.128013	undirected	Tnmd	Gdap1
MMT00034448	MMT00033228	0.060076	undirected	Tnmd	Ly86
MMT00034448	MMT00078239	0.0756243	undirected	Tnmd	Homer3
MMT00034448	MMT00027755	0.0817505	undirected	Tnmd	Mak
MMT00034448	MMT00055430	0.0735791	undirected	Tnmd	S100a3
MMT00034448	MMT00063470	0.0879635	undirected	Tnmd	Agxt
MMT00034448	MMT00021096	0.0777552	undirected	Tnmd	H2-DMa
MMT00034448	MMT00057404	0.0698078	undirected	Tnmd	Prss12
MMT00034448	MMT00037025	0.158521	undirected	Tnmd	Bmper
MMT00034448	MMT00030601	0.190547	undirected	Tnmd	Zfp287
MMT00034448	MMT00021946	0.110169	undirected	Tnmd	Rfx4
MMT00034448	MMT00053102	0.127467	undirected	Tnmd	Cacna2d3
MMT00034448	MMT00047610	0.0846187	undirected	Tnmd	Cst9
MMT00034448	MMT00057059	0.0974663	undirected	Tnmd	P2rx7
MMT00034448	MMT00036564	0.0467405	undirected	Tnmd	Pik3cg
MMT00034448	MMT00071500	0.113677	undirected	Tnmd	Mx2
MMT00034448	MMT00072394	0.0494018	undirected	Tnmd	Trpc4
MMT00034448	MMT00010142	0.177876	undirected	Tnmd	Sfrp2
MMT00034448	MMT00076717	0.0586768	undirected	Tnmd	Diap3
MMT00034448	MMT00036250	0.0477473	undirected	Tnmd	Ankrd1
MMT00034448	MMT00008784	0.109979	undirected	Tnmd	Hspa8
MMT00034448	MMT00075488	0.0663656	undirected	Tnmd	Slc35d1
MMT00034448	MMT00022062	0.0382947	undirected	Tnmd	Col13a1
MMT00034448	MMT00054240	0.0240067	undirected	Tnmd	Sox11
MMT00034448	MMT00054409	0.0527249	undirected	Tnmd	Dbnl
MMT00034448	MMT00043465	0.0760189	undirected	Tnmd	1700011F03Rik
MMT00034448	MMT00069620	0.0434713	undirected	Tnmd	Nova1
MMT00034448	MMT00031333	0.0977144	undirected	Tnmd	Pcdhb13
MMT00034448	MMT00079156	0.127999	undirected	Tnmd	Ms4a4d
MMT00034448	MMT00044361	0.0567947	undirected	Tnmd	Plekhb2
MMT00034448	MMT00015096	0.0572627	undirected	Tnmd	Slc6a15
MMT00034448	MMT00060215	0.0324392	undirected	Tnmd	Pln
MMT00034448	MMT00024264	0.104586	undirected	Tnmd	Alms1
MMT00034448	MMT00029598	0.0731693	undirected	Tnmd	Uchl1
MMT00034448	MMT00019749	0.032109	undirected	Tnmd	Dach2
MMT00034448	MMT00033072	0.0340748	undirected	Tnmd	Rnf103
MMT00034448	MMT00065768	0.115738	undirected	Tnmd	Igfbp4
MMT00034448	MMT00051022	0.186577	undirected	Tnmd	Fgd2
MMT00034448	MMT00076599	0.13018	undirected	Tnmd	Ece2
MMT00034448	MMT00069165	0.0996025	undirected	Tnmd	Fbln5
MMT00034448	MMT00060813	0.0904918	undirected	Tnmd	Sdc3
MMT00034448	MMT00077777	0.113191	undirected	Tnmd	4932414N04Rik
MMT00034448	MMT00081993	0.117793	undirected	Tnmd	Col8a1
MMT00034448	MMT00026998	0.101526	undirected	Tnmd	2210020M01Rik
MMT00034448	MMT00030373	0.0734048	undirected	Tnmd	Crlf1
MMT00034448	MMT00065883	0.0487333	undirected	Tnmd	Foxn2
MMT00034448	MMT00067082	0.0448154	undirected	Tnmd	Chrna4
MMT00034448	MMT00013974	0.03365	undirected	Tnmd	Drd1a
MMT00034448	MMT00036723	0.0669812	undirected	Tnmd	Slc9a9
MMT00034448	MMT00060597	0.109421	undirected	Tnmd	Bpgm
MMT00034448	MMT00000131	0.10603	undirected	Tnmd	Cntn6
MMT00034448	MMT00020772	0.0752209	undirected	Tnmd	Ctdsp2
MMT00034448	MMT00050965	0.108593	undirected	Tnmd	Slc15a3
MMT00034448	MMT00048155	0.0221191	undirected	Tnmd	Slpi
MMT00034448	MMT00053034	0.13375	undirected	Tnmd	Kif1a
MMT00034448	MMT00036955	0.161546	undirected	Tnmd	Jrk
MMT00034448	MMT00016676	0.0355685	undirected	Tnmd	Kcnk5
MMT00034448	MMT00005957	0.113752	undirected	Tnmd	Cpxm2
MMT00034448	MMT00025067	0.0851645	undirected	Tnmd	Rgs18
MMT00034448	MMT00056571	0.122462	undirected	Tnmd	BC026585
MMT00034448	MMT00038375	0.0410403	undirected	Tnmd	AW146020
MMT00034448	MMT00012541	0.0744991	undirected	Tnmd	Lcp1
MMT00034448	MMT00068584	0.106499	undirected	Tnmd	Bid
MMT00034448	MMT00068509	0.0337657	undirected	Tnmd	Oit3
MMT00034448	MMT00005653	0.0663196	undirected	Tnmd	Ccr5
MMT00034448	MMT00072526	0.0434804	undirected	Tnmd	Foxo6
MMT00034448	MMT00016365	0.0580233	undirected	Tnmd	Sncaip
MMT00034448	MMT00054808	0.140481	undirected	Tnmd	Csf1r
MMT00034448	MMT00006988	0.117934	undirected	Tnmd	Olig1
MMT00034448	MMT00040864	0.0510587	undirected	Tnmd	Chst2
MMT00034448	MMT00065750	0.111326	undirected	Tnmd	Pdxp
MMT00034448	MMT00029323	0.0943364	undirected	Tnmd	Htr1a
MMT00034448	MMT00047171	0.058386	undirected	Tnmd	Icam1
MMT00034448	MMT00037375	0.169023	undirected	Tnmd	Skiv2l
MMT00034448	MMT00011577	0.188751	undirected	Tnmd	Il28ra
MMT00034448	MMT00016680	0.0671392	undirected	Tnmd	Aamp
MMT00034448	MMT00040374	0.0271678	undirected	Tnmd	Trim9
MMT00034448	MMT00000608	0.0787773	undirected	Tnmd	Ccl5
MMT00034448	MMT00049364	0.0265952	undirected	Tnmd	Kbtbd10
MMT00034448	MMT00039970	0.146112	undirected	Tnmd	Pak1
MMT00034448	MMT00001342	0.0378663	undirected	Tnmd	Sertad3
MMT00034448	MMT00031882	0.0742042	undirected	Tnmd	4933402N03Rik
MMT00034448	MMT00010449	0.0713057	undirected	Tnmd	Cacng5
MMT00034448	MMT00005231	0.0462133	undirected	Tnmd	Tmie
MMT00034448	MMT00080573	0.111189	undirected	Tnmd	Rtn4rl1
MMT00034448	MMT00005428	0.0645174	undirected	Tnmd	D430019H16Rik
MMT00034448	MMT00018141	0.0939798	undirected	Tnmd	Pik3cd
MMT00034448	MMT00061075	0.0555512	undirected	Tnmd	Arid3a
MMT00034448	MMT00000368	0.0644707	undirected	Tnmd	Spry1
MMT00034448	MMT00080083	0.0538702	undirected	Tnmd	Wt1
MMT00034448	MMT00064107	0.130631	undirected	Tnmd	Mlana
MMT00034448	MMT00003243	0.0371965	undirected	Tnmd	Lrrc4b
MMT00034448	MMT00010362	0.073036	undirected	Tnmd	Grb10
MMT00034448	MMT00045272	0.102186	undirected	Tnmd	Etv4
MMT00034448	MMT00036749	0.0337976	undirected	Tnmd	1190002N15Rik
MMT00034448	MMT00079222	0.0727325	undirected	Tnmd	Cntn1
MMT00034448	MMT00077375	0.139858	undirected	Tnmd	Cd68
MMT00034448	MMT00080633	0.117839	undirected	Tnmd	Cxcr6
MMT00034448	MMT00037447	0.0793384	undirected	Tnmd	Trem2
MMT00034448	MMT00029329	0.114781	undirected	Tnmd	Ppfia4
MMT00034448	MMT00019490	0.0970117	undirected	Tnmd	Folh1
MMT00034448	MMT00073624	0.16443	undirected	Tnmd	Hcrtr1
MMT00034448	MMT00015288	0.0667134	undirected	Tnmd	1700015G11Rik
MMT00034448	MMT00079572	0.103075	undirected	Tnmd	9430091E24Rik
MMT00034448	MMT00043771	0.0564507	undirected	Tnmd	Plek
MMT00034448	MMT00013893	0.0394919	undirected	Tnmd	Cyp2s1
MMT00034448	MMT00072852	0.0271046	undirected	Tnmd	Bai2
MMT00034448	MMT00064623	0.121946	undirected	Tnmd	Abcc6
MMT00034448	MMT00077956	0.0783402	undirected	Tnmd	Ltbp2
MMT00034448	MMT00000777	0.192813	undirected	Tnmd	F3
MMT00034448	MMT00031183	0.23353	undirected	Tnmd	Mdk
MMT00034448	MMT00053446	0.0800822	undirected	Tnmd	Ptges
MMT00034448	MMT00019358	0.0825956	undirected	Tnmd	Tnr
MMT00034448	MMT00008854	0.123371	undirected	Tnmd	H2-Q7
MMT00034448	MMT00006677	0.0524622	undirected	Tnmd	Clic3
MMT00034448	MMT00017740	0.0305376	undirected	Tnmd	Vps52
MMT00034448	MMT00001955	0.0564047	undirected	Tnmd	Olfr1265
MMT00034448	MMT00009954	0.0577638	undirected	Tnmd	Olfr470
MMT00034448	MMT00060429	0.088249	undirected	Tnmd	Olfr1052
MMT00034448	MMT00025169	0.0609735	undirected	Tnmd	Insrr
MMT00034448	MMT00048637	0.0659282	undirected	Tnmd	Crybb3
MMT00034448	MMT00070418	0.133567	undirected	Tnmd	Adra2c
MMT00034448	MMT00041887	0.0485432	undirected	Tnmd	Hcst
MMT00034448	MMT00005482	0.109918	undirected	Tnmd	Ibsp
MMT00034448	MMT00054422	0.0997777	undirected	Tnmd	Mrc1
MMT00034448	MMT00020142	0.0720929	undirected	Tnmd	Adam34
MMT00034448	MMT00006881	0.0388544	undirected	Tnmd	Pprc1
MMT00034448	MMT00078815	0.0433147	undirected	Tnmd	Ptprf
MMT00034448	MMT00008186	0.0489192	undirected	Tnmd	Ubtf
MMT00034448	MMT00047462	0.0540016	undirected	Tnmd	Ttc12
MMT00034448	MMT00027378	0.0837858	undirected	Tnmd	Itih3
MMT00034448	MMT00016989	0.0287005	undirected	Tnmd	Ifi47
MMT00034448	MMT00024553	0.0724501	undirected	Tnmd	Cps1
MMT00034448	MMT00001160	0.0513508	undirected	Tnmd	1500009C09Rik
MMT00034448	MMT00046600	0.0848689	undirected	Tnmd	Scn3b
MMT00034448	MMT00022777	0.186488	undirected	Tnmd	C530028O21Rik
MMT00034448	MMT00012502	0.116143	undirected	Tnmd	Ass1
MMT00034448	MMT00031281	0.12653	undirected	Tnmd	Il3ra
MMT00034448	MMT00004123	0.161943	undirected	Tnmd	Cdkn2a
MMT00034448	MMT00068712	0.123058	undirected	Tnmd	Fcgr1
MMT00034448	MMT00010412	0.0507647	undirected	Tnmd	Serpina1d
MMT00034448	MMT00056703	0.084276	undirected	Tnmd	Serpinb6b
MMT00034448	MMT00064871	0.0669635	undirected	Tnmd	Oxtr
MMT00034448	MMT00007847	0.13111	undirected	Tnmd	Gal3st1
MMT00034448	MMT00006013	0.0843197	undirected	Tnmd	Gjb3
MMT00034448	MMT00029984	0.0485926	undirected	Tnmd	Sema5a
MMT00034448	MMT00006432	0.119572	undirected	Tnmd	Il17re
MMT00034448	MMT00021150	0.145376	undirected	Tnmd	Prosapip1
MMT00034448	MMT00006067	0.0321152	undirected	Tnmd	Adra2a
MMT00034448	MMT00072686	0.162024	undirected	Tnmd	Enpp5
MMT00034448	MMT00033710	0.0258392	undirected	Tnmd	Muc4
MMT00034448	MMT00044934	0.0208712	undirected	Tnmd	Olfr729
MMT00034448	MMT00030138	0.0448675	undirected	Tnmd	Clcn1
MMT00034448	MMT00008072	0.149415	undirected	Tnmd	Cabp5
MMT00034448	MMT00045480	0.08606	undirected	Tnmd	Gyk
MMT00034448	MMT00069832	0.0638339	undirected	Tnmd	Mbd2
MMT00034448	MMT00015631	0.102758	undirected	Tnmd	Atp1a3
MMT00034448	MMT00022494	0.141518	undirected	Tnmd	Slc22a18
MMT00034448	MMT00037781	0.104048	undirected	Tnmd	Gas7
MMT00034448	MMT00080177	0.0640372	undirected	Tnmd	Gzmk
MMT00034448	MMT00028683	0.0652241	undirected	Tnmd	Msx2
MMT00034448	MMT00048340	0.188639	undirected	Tnmd	Efemp1
MMT00034448	MMT00080684	0.048875	undirected	Tnmd	BC013712
MMT00034448	MMT00067079	0.128078	undirected	Tnmd	Fetub
MMT00034448	MMT00001806	0.0921675	undirected	Tnmd	Cd84
MMT00034448	MMT00022586	0.110428	undirected	Tnmd	Apod
MMT00034448	MMT00026944	0.073073	undirected	Tnmd	Igfbp2
MMT00034448	MMT00036455	0.122205	undirected	Tnmd	G6pc2
MMT00034448	MMT00016669	0.0893494	undirected	Tnmd	Gp49a
MMT00034448	MMT00002249	0.033438	undirected	Tnmd	Ank1
MMT00034448	MMT00059847	0.155653	undirected	Tnmd	Ngb
MMT00034448	MMT00019014	0.0431416	undirected	Tnmd	Yars
MMT00034448	MMT00035020	0.165825	undirected	Tnmd	Prkar1b
MMT00034448	MMT00049504	0.0686837	undirected	Tnmd	Slc6a4
MMT00034448	MMT00074183	0.191885	undirected	Tnmd	Wrb
MMT00034448	MMT00073625	0.171306	undirected	Tnmd	A230065H16Rik
MMT00034448	MMT00045159	0.087337	undirected	Tnmd	Cbs
MMT00034448	MMT00074216	0.0206755	undirected	Tnmd	Cyp2b19
MMT00034448	MMT00068444	0.0342116	undirected	Tnmd	Prnd
MMT00034448	MMT00008639	0.0236511	undirected	Tnmd	Olfr975
MMT00034448	MMT00004176	0.112916	undirected	Tnmd	Cybb
MMT00034448	MMT00044885	0.03393	undirected	Tnmd	Capn9
MMT00034448	MMT00028197	0.0660314	undirected	Tnmd	4930438A08Rik
MMT00034448	MMT00006698	0.056151	undirected	Tnmd	Olfr667
MMT00034448	MMT00029202	0.0989914	undirected	Tnmd	Rgs7
MMT00034448	MMT00071233	0.0518447	undirected	Tnmd	Pou2af1
MMT00034448	MMT00017138	0.0771166	undirected	Tnmd	Myo3a
MMT00034448	MMT00009424	0.08097	undirected	Tnmd	Traf2
MMT00034448	MMT00010285	0.0697682	undirected	Tnmd	Pzp
MMT00034448	MMT00021948	0.0859742	undirected	Tnmd	Sf3a2
MMT00034448	MMT00078069	0.09531	undirected	Tnmd	1810010H24Rik
MMT00034448	MMT00037199	0.0274453	undirected	Tnmd	Adcy9
MMT00034448	MMT00038396	0.0290783	undirected	Tnmd	Bglap2
MMT00034448	MMT00006323	0.127374	undirected	Tnmd	Ache
MMT00034448	MMT00033506	0.0644679	undirected	Tnmd	4632427E13Rik
MMT00034448	MMT00022784	0.0310964	undirected	Tnmd	Usp18
MMT00034448	MMT00003475	0.0824859	undirected	Tnmd	Alg12
MMT00034448	MMT00026973	0.142175	undirected	Tnmd	Mx1
MMT00034448	MMT00020871	0.0847722	undirected	Tnmd	Fcer1a
MMT00034448	MMT00081348	0.166904	undirected	Tnmd	Myo1f
MMT00034448	MMT00081727	0.0715115	undirected	Tnmd	Tbc1d12
MMT00034448	MMT00043936	0.0481061	undirected	Tnmd	Cd48
MMT00034448	MMT00018014	0.161778	undirected	Tnmd	Pard6g
MMT00034448	MMT00058269	0.0311823	undirected	Tnmd	Tas2r105
MMT00034448	MMT00031488	0.0822605	undirected	Tnmd	Sorl1
MMT00034448	MMT00046154	0.124866	undirected	Tnmd	9330182L06Rik
MMT00034448	MMT00032750	0.0315604	undirected	Tnmd	Atp1b4
MMT00034448	MMT00031340	0.150893	undirected	Tnmd	Nfasc
MMT00034448	MMT00056668	0.0225309	undirected	Tnmd	Ccl28
MMT00034448	MMT00069732	0.134187	undirected	Tnmd	Calb1
MMT00034448	MMT00049304	0.105016	undirected	Tnmd	Cyp3a13
MMT00034448	MMT00037740	0.0832658	undirected	Tnmd	Ptpro
MMT00034448	MMT00078782	0.0306639	undirected	Tnmd	Mpp2
MMT00034448	MMT00048579	0.0438437	undirected	Tnmd	Nrap
MMT00034448	MMT00026943	0.0917569	undirected	Tnmd	Rorb
MMT00034448	MMT00014106	0.0238428	undirected	Tnmd	4933400C23
MMT00034448	MMT00036143	0.0652578	undirected	Tnmd	Glipr2
MMT00034448	MMT00000760	0.0777126	undirected	Tnmd	Tcrb-J
MMT00034448	MMT00071842	0.15682	undirected	Tnmd	Prrx2
MMT00034448	MMT00038361	0.113908	undirected	Tnmd	Tgfbr3
MMT00034448	MMT00035279	0.164918	undirected	Tnmd	Fez1
MMT00034448	MMT00053906	0.0726402	undirected	Tnmd	Hao1
MMT00034448	MMT00061212	0.118623	undirected	Tnmd	Ccnd1
MMT00034448	MMT00082175	0.0779012	undirected	Tnmd	Cdh3
MMT00034448	MMT00070310	0.208129	undirected	Tnmd	Kctd12
MMT00034448	MMT00046734	0.141297	undirected	Tnmd	Sardh
MMT00034448	MMT00038451	0.0631601	undirected	Tnmd	4930417G10Rik
MMT00034448	MMT00020883	0.0648671	undirected	Tnmd	Kit
MMT00063550	MMT00027193	0.120097	undirected	Fbxo32	Arid2
MMT00063550	MMT00018843	0.0507266	undirected	Fbxo32	1600029D21Rik
MMT00063550	MMT00059280	0.0293188	undirected	Fbxo32	Coch
MMT00063550	MMT00063533	0.178182	undirected	Fbxo32	Ms4a4b
MMT00063550	MMT00010083	0.0205874	undirected	Fbxo32	Cyp4f15
MMT00063550	MMT00033205	0.125571	undirected	Fbxo32	Cst7
MMT00063550	MMT00012362	0.0242731	undirected	Fbxo32	Fcna
MMT00063550	MMT00079177	0.0202412	undirected	Fbxo32	Card14
MMT00063550	MMT00048973	0.0370991	undirected	Fbxo32	Mcpt4
MMT00063550	MMT00018127	0.148893	undirected	Fbxo32	Ntn1
MMT00063550	MMT00012338	0.154354	undirected	Fbxo32	Ptgfrn
MMT00063550	MMT00009429	0.159776	undirected	Fbxo32	Serpinb13
MMT00063550	MMT00012971	0.155671	undirected	Fbxo32	Mgst2
MMT00063550	MMT00067891	0.0661026	undirected	Fbxo32	Folr2
MMT00063550	MMT00082385	0.189784	undirected	Fbxo32	Nme4
MMT00063550	MMT00031654	0.0681657	undirected	Fbxo32	Hs6st1
MMT00063550	MMT00030404	0.136324	undirected	Fbxo32	C1qa
MMT00063550	MMT00081212	0.113029	undirected	Fbxo32	Slfn4
MMT00063550	MMT00030541	0.0371732	undirected	Fbxo32	Gdf10
MMT00063550	MMT00011648	0.0404312	undirected	Fbxo32	Rem2
MMT00063550	MMT00018095	0.0796147	undirected	Fbxo32	Gk2
MMT00063550	MMT00082420	0.0801916	undirected	Fbxo32	Cd83
MMT00063550	MMT00080603	0.0306708	undirected	Fbxo32	Anxa8
MMT00063550	MMT00068279	0.0334063	undirected	Fbxo32	Fmod
MMT00063550	MMT00059097	0.0891871	undirected	Fbxo32	Sc4mol
MMT00063550	MMT00072505	0.0340808	undirected	Fbxo32	Abp1
MMT00063550	MMT00031546	0.0351909	undirected	Fbxo32	Cpa3
MMT00063550	MMT00059295	0.127586	undirected	Fbxo32	Cab39
MMT00063550	MMT00045956	0.149933	undirected	Fbxo32	Il10ra
MMT00063550	MMT00030162	0.0379163	undirected	Fbxo32	Trpv5
MMT00063550	MMT00079309	0.0936941	undirected	Fbxo32	Exo1
MMT00063550	MMT00079541	0.101265	undirected	Fbxo32	Pi15
MMT00063550	MMT00025100	0.0677041	undirected	Fbxo32	Sppl3
MMT00063550	MMT00044688	0.144254	undirected	Fbxo32	Akr1c12
MMT00063550	MMT00019015	0.0570338	undirected	Fbxo32	Dpys
MMT00063550	MMT00055921	0.022006	undirected	Fbxo32	Retnla
MMT00063550	MMT00063663	0.021413	undirected	Fbxo32	Rgs1
MMT00063550	MMT00023471	0.142579	undirected	Fbxo32	Tyrobp
MMT00063550	MMT00073282	0.078126	undirected	Fbxo32	Itgb2
MMT00063550	MMT00044207	0.133257	undirected	Fbxo32	Kctd16
MMT00063550	MMT00080429	0.0335168	undirected	Fbxo32	Slc15a2
MMT00063550	MMT00037697	0.027724	undirected	Fbxo32	Acr
MMT00063550	MMT00039835	0.0201619	undirected	Fbxo32	Olfr575
MMT00063550	MMT00079011	0.130913	undirected	Fbxo32	Gmip
MMT00063550	MMT00017876	0.187672	undirected	Fbxo32	H2-DMb1
MMT00063550	MMT00011746	0.0354934	undirected	Fbxo32	Plcb1
MMT00063550	MMT00028633	0.0826903	undirected	Fbxo32	Frzb
MMT00063550	MMT00028910	0.0727315	undirected	Fbxo32	Cdh16
MMT00063550	MMT00055270	0.081745	undirected	Fbxo32	Ifitm6
MMT00063550	MMT00029403	0.230154	undirected	Fbxo32	2010107G23Rik
MMT00063550	MMT00018370	0.106604	undirected	Fbxo32	Csf3
MMT00063550	MMT00011158	0.0531984	undirected	Fbxo32	Syt10
MMT00063550	MMT00058927	0.0240191	undirected	Fbxo32	3110009E18Rik
MMT00063550	MMT00034980	0.0645162	undirected	Fbxo32	4833427G06Rik
MMT00063550	MMT00005022	0.0308899	undirected	Fbxo32	1700025G04Rik
MMT00063550	MMT00042972	0.215934	undirected	Fbxo32	Aox1
MMT00063550	MMT00014701	0.0803954	undirected	Fbxo32	Cdon
MMT00063550	MMT00053670	0.180532	undirected	Fbxo32	Chn1
MMT00063550	MMT00078723	0.0475166	undirected	Fbxo32	Mmp2
MMT00063550	MMT00049421	0.126043	undirected	Fbxo32	Cd79b
MMT00063550	MMT00082376	0.021998	undirected	Fbxo32	Scn1b
MMT00063550	MMT00012907	0.147579	undirected	Fbxo32	Rest
MMT00063550	MMT00069681	0.119191	undirected	Fbxo32	Tnnc2
MMT00063550	MMT00012212	0.0339768	undirected	Fbxo32	Slc25a30
MMT00063550	MMT00049221	0.0539113	undirected	Fbxo32	Hic1
MMT00063550	MMT00080956	0.076932	undirected	Fbxo32	Doc2g
MMT00063550	MMT00054089	0.143765	undirected	Fbxo32	Itgb7
MMT00063550	MMT00022926	0.0277524	undirected	Fbxo32	Myoc
MMT00063550	MMT00070222	0.0237603	undirected	Fbxo32	Rasa4
MMT00063550	MMT00082736	0.0203808	undirected	Fbxo32	4931428L18Rik
MMT00063550	MMT00059245	0.024225	undirected	Fbxo32	Rarres1
MMT00063550	MMT00002362	0.0586874	undirected	Fbxo32	Fmnl1
MMT00063550	MMT00067186	0.0872896	undirected	Fbxo32	Irf7
MMT00063550	MMT00026709	0.134001	undirected	Fbxo32	Vnn1
MMT00063550	MMT00005510	0.0307037	undirected	Fbxo32	Ahsg
MMT00063550	MMT00027892	0.0224454	undirected	Fbxo32	Mmp20
MMT00063550	MMT00049862	0.0685958	undirected	Fbxo32	Pgc
MMT00063550	MMT00070618	0.0972683	undirected	Fbxo32	Npl
MMT00063550	MMT00014165	0.144091	undirected	Fbxo32	Klhl6
MMT00063550	MMT00013511	0.0624445	undirected	Fbxo32	Olfr1504
MMT00063550	MMT00047418	0.0407893	undirected	Fbxo32	Gpnmb
MMT00063550	MMT00034690	0.0940731	undirected	Fbxo32	Dok2
MMT00063550	MMT00048836	0.0457995	undirected	Fbxo32	Ear11
MMT00063550	MMT00060071	0.0586334	undirected	Fbxo32	Hpgd
MMT00063550	MMT00015239	0.06214	undirected	Fbxo32	Gdap1
MMT00063550	MMT00033228	0.165352	undirected	Fbxo32	Ly86
MMT00063550	MMT00078239	0.02195	undirected	Fbxo32	Homer3
MMT00063550	MMT00009738	0.0516915	undirected	Fbxo32	Ropn1
MMT00063550	MMT00027755	0.134058	undirected	Fbxo32	Mak
MMT00063550	MMT00055430	0.0672086	undirected	Fbxo32	S100a3
MMT00063550	MMT00063470	0.0794791	undirected	Fbxo32	Agxt
MMT00063550	MMT00021096	0.180445	undirected	Fbxo32	H2-DMa
MMT00063550	MMT00057404	0.0697335	undirected	Fbxo32	Prss12
MMT00063550	MMT00037025	0.0848955	undirected	Fbxo32	Bmper
MMT00063550	MMT00030601	0.0765351	undirected	Fbxo32	Zfp287
MMT00063550	MMT00021946	0.0580238	undirected	Fbxo32	Rfx4
MMT00063550	MMT00047610	0.0213689	undirected	Fbxo32	Cst9
MMT00063550	MMT00057059	0.0213052	undirected	Fbxo32	P2rx7
MMT00063550	MMT00036564	0.0777357	undirected	Fbxo32	Pik3cg
MMT00063550	MMT00071500	0.0445758	undirected	Fbxo32	Mx2
MMT00063550	MMT00010142	0.0451195	undirected	Fbxo32	Sfrp2
MMT00063550	MMT00076717	0.0971056	undirected	Fbxo32	Diap3
MMT00063550	MMT00075488	0.0833412	undirected	Fbxo32	Slc35d1
MMT00063550	MMT00022062	0.0344742	undirected	Fbxo32	Col13a1
MMT00063550	MMT00037307	0.0268508	undirected	Fbxo32	Cpa4
MMT00063550	MMT00054240	0.0270609	undirected	Fbxo32	Sox11
MMT00063550	MMT00043465	0.128606	undirected	Fbxo32	1700011F03Rik
MMT00063550	MMT00069620	0.106494	undirected	Fbxo32	Nova1
MMT00063550	MMT00031333	0.0262763	undirected	Fbxo32	Pcdhb13
MMT00063550	MMT00079156	0.0356676	undirected	Fbxo32	Ms4a4d
MMT00063550	MMT00060215	0.0502064	undirected	Fbxo32	Pln
MMT00063550	MMT00024264	0.0900285	undirected	Fbxo32	Alms1
MMT00063550	MMT00019749	0.0937638	undirected	Fbxo32	Dach2
MMT00063550	MMT00033072	0.0470553	undirected	Fbxo32	Rnf103
MMT00063550	MMT00065768	0.0342917	undirected	Fbxo32	Igfbp4
MMT00063550	MMT00051022	0.228365	undirected	Fbxo32	Fgd2
MMT00063550	MMT00076599	0.0335958	undirected	Fbxo32	Ece2
MMT00063550	MMT00069165	0.0259957	undirected	Fbxo32	Fbln5
MMT00063550	MMT00060813	0.137261	undirected	Fbxo32	Sdc3
MMT00063550	MMT00077777	0.0741598	undirected	Fbxo32	4932414N04Rik
MMT00063550	MMT00081993	0.0445635	undirected	Fbxo32	Col8a1
MMT00063550	MMT00026998	0.126076	undirected	Fbxo32	2210020M01Rik
MMT00063550	MMT00067082	0.0867618	undirected	Fbxo32	Chrna4
MMT00063550	MMT00013974	0.0297976	undirected	Fbxo32	Drd1a
MMT00063550	MMT00036723	0.0534646	undirected	Fbxo32	Slc9a9
MMT00063550	MMT00060597	0.068221	undirected	Fbxo32	Bpgm
MMT00063550	MMT00020772	0.0801353	undirected	Fbxo32	Ctdsp2
MMT00063550	MMT00050965	0.0687481	undirected	Fbxo32	Slc15a3
MMT00063550	MMT00036955	0.0424632	undirected	Fbxo32	Jrk
MMT00063550	MMT00016676	0.0768836	undirected	Fbxo32	Kcnk5
MMT00063550	MMT00025067	0.0484419	undirected	Fbxo32	Rgs18
MMT00063550	MMT00056571	0.136188	undirected	Fbxo32	BC026585
MMT00063550	MMT00038375	0.0990784	undirected	Fbxo32	AW146020
MMT00063550	MMT00012541	0.139646	undirected	Fbxo32	Lcp1
MMT00063550	MMT00068584	0.0332396	undirected	Fbxo32	Bid
MMT00063550	MMT00068509	0.096411	undirected	Fbxo32	Oit3
MMT00063550	MMT00005653	0.0651977	undirected	Fbxo32	Ccr5
MMT00063550	MMT00072526	0.0265894	undirected	Fbxo32	Foxo6
MMT00063550	MMT00016365	0.093456	undirected	Fbxo32	Sncaip
MMT00063550	MMT00054808	0.151637	undirected	Fbxo32	Csf1r
MMT00063550	MMT00006988	0.116249	undirected	Fbxo32	Olig1
MMT00063550	MMT00040864	0.0455278	undirected	Fbxo32	Chst2
MMT00063550	MMT00065750	0.111697	undirected	Fbxo32	Pdxp
MMT00063550	MMT00029323	0.02959	undirected	Fbxo32	Htr1a
MMT00063550	MMT00047171	0.0228325	undirected	Fbxo32	Icam1
MMT00063550	MMT00037375	0.0914062	undirected	Fbxo32	Skiv2l
MMT00063550	MMT00011577	0.0671871	undirected	Fbxo32	Il28ra
MMT00063550	MMT00016680	0.0251195	undirected	Fbxo32	Aamp
MMT00063550	MMT00000608	0.123431	undirected	Fbxo32	Ccl5
MMT00063550	MMT00049364	0.0761011	undirected	Fbxo32	Kbtbd10
MMT00063550	MMT00001342	0.0870036	undirected	Fbxo32	Sertad3
MMT00063550	MMT00005231	0.100364	undirected	Fbxo32	Tmie
MMT00063550	MMT00080573	0.0308652	undirected	Fbxo32	Rtn4rl1
MMT00063550	MMT00018141	0.0846426	undirected	Fbxo32	Pik3cd
MMT00063550	MMT00064107	0.0303873	undirected	Fbxo32	Mlana
MMT00063550	MMT00003243	0.0420546	undirected	Fbxo32	Lrrc4b
MMT00063550	MMT00010362	0.150577	undirected	Fbxo32	Grb10
MMT00063550	MMT00036749	0.0608361	undirected	Fbxo32	1190002N15Rik
MMT00063550	MMT00077375	0.188631	undirected	Fbxo32	Cd68
MMT00063550	MMT00080633	0.0619651	undirected	Fbxo32	Cxcr6
MMT00063550	MMT00037447	0.0555081	undirected	Fbxo32	Trem2
MMT00063550	MMT00029329	0.110554	undirected	Fbxo32	Ppfia4
MMT00063550	MMT00073624	0.11632	undirected	Fbxo32	Hcrtr1
MMT00063550	MMT00015288	0.0839715	undirected	Fbxo32	1700015G11Rik
MMT00063550	MMT00079572	0.0736915	undirected	Fbxo32	9430091E24Rik
MMT00063550	MMT00043771	0.0690916	undirected	Fbxo32	Plek
MMT00063550	MMT00072852	0.0230877	undirected	Fbxo32	Bai2
MMT00063550	MMT00073226	0.0213311	undirected	Fbxo32	Mycs
MMT00063550	MMT00064623	0.0204423	undirected	Fbxo32	Abcc6
MMT00063550	MMT00077956	0.186691	undirected	Fbxo32	Ltbp2
MMT00063550	MMT00000777	0.0380643	undirected	Fbxo32	F3
MMT00063550	MMT00031183	0.0652537	undirected	Fbxo32	Mdk
MMT00063550	MMT00017992	0.0676026	undirected	Fbxo32	Gsg1
MMT00063550	MMT00053446	0.171488	undirected	Fbxo32	Ptges
MMT00063550	MMT00008854	0.264628	undirected	Fbxo32	H2-Q7
MMT00063550	MMT00006677	0.029388	undirected	Fbxo32	Clic3
MMT00063550	MMT00017740	0.0916361	undirected	Fbxo32	Vps52
MMT00063550	MMT00009954	0.171154	undirected	Fbxo32	Olfr470
MMT00063550	MMT00025169	0.0256996	undirected	Fbxo32	Insrr
MMT00063550	MMT00070418	0.0478408	undirected	Fbxo32	Adra2c
MMT00063550	MMT00041887	0.108343	undirected	Fbxo32	Hcst
MMT00063550	MMT00054422	0.0725061	undirected	Fbxo32	Mrc1
MMT00063550	MMT00020142	0.073647	undirected	Fbxo32	Adam34
MMT00063550	MMT00006881	0.131545	undirected	Fbxo32	Pprc1
MMT00063550	MMT00008186	0.108282	undirected	Fbxo32	Ubtf
MMT00063550	MMT00016989	0.138107	undirected	Fbxo32	Ifi47
MMT00063550	MMT00024553	0.0416715	undirected	Fbxo32	Cps1
MMT00063550	MMT00001160	0.0595831	undirected	Fbxo32	1500009C09Rik
MMT00063550	MMT00016783	0.0318772	undirected	Fbxo32	Podn
MMT00063550	MMT00046600	0.030859	undirected	Fbxo32	Scn3b
MMT00063550	MMT00022777	0.109793	undirected	Fbxo32	C530028O21Rik
MMT00063550	MMT00004123	0.146762	undirected	Fbxo32	Cdkn2a
MMT00063550	MMT00068712	0.197316	undirected	Fbxo32	Fcgr1
MMT00063550	MMT00064871	0.0950391	undirected	Fbxo32	Oxtr
MMT00063550	MMT00007847	0.0517019	undirected	Fbxo32	Gal3st1
MMT00063550	MMT00006013	0.0230538	undirected	Fbxo32	Gjb3
MMT00063550	MMT00029984	0.190232	undirected	Fbxo32	Sema5a
MMT00063550	MMT00026736	0.0538987	undirected	Fbxo32	Olfr24
MMT00063550	MMT00006432	0.0414897	undirected	Fbxo32	Il17re
MMT00063550	MMT00021150	0.0960412	undirected	Fbxo32	Prosapip1
MMT00063550	MMT00006067	0.0816432	undirected	Fbxo32	Adra2a
MMT00063550	MMT00072686	0.0540075	undirected	Fbxo32	Enpp5
MMT00063550	MMT00033710	0.0373751	undirected	Fbxo32	Muc4
MMT00063550	MMT00030138	0.123818	undirected	Fbxo32	Clcn1
MMT00063550	MMT00008072	0.118668	undirected	Fbxo32	Cabp5
MMT00063550	MMT00015631	0.168763	undirected	Fbxo32	Atp1a3
MMT00063550	MMT00022494	0.0434828	undirected	Fbxo32	Slc22a18
MMT00063550	MMT00037781	0.0811706	undirected	Fbxo32	Gas7
MMT00063550	MMT00080177	0.0436663	undirected	Fbxo32	Gzmk
MMT00063550	MMT00028683	0.14179	undirected	Fbxo32	Msx2
MMT00063550	MMT00048340	0.0766467	undirected	Fbxo32	Efemp1
MMT00063550	MMT00080684	0.138366	undirected	Fbxo32	BC013712
MMT00063550	MMT00067079	0.101207	undirected	Fbxo32	Fetub
MMT00063550	MMT00001806	0.108238	undirected	Fbxo32	Cd84
MMT00063550	MMT00022586	0.0283747	undirected	Fbxo32	Apod
MMT00063550	MMT00036455	0.0857431	undirected	Fbxo32	G6pc2
MMT00063550	MMT00016669	0.118741	undirected	Fbxo32	Gp49a
MMT00063550	MMT00059847	0.0251232	undirected	Fbxo32	Ngb
MMT00063550	MMT00015950	0.113812	undirected	Fbxo32	Cnksr2
MMT00063550	MMT00019014	0.0261173	undirected	Fbxo32	Yars
MMT00063550	MMT00035020	0.0631603	undirected	Fbxo32	Prkar1b
MMT00063550	MMT00074183	0.194193	undirected	Fbxo32	Wrb
MMT00063550	MMT00073625	0.0410729	undirected	Fbxo32	A230065H16Rik
MMT00063550	MMT00045159	0.0999348	undirected	Fbxo32	Cbs
MMT00063550	MMT00074216	0.0399476	undirected	Fbxo32	Cyp2b19
MMT00063550	MMT00008639	0.0532074	undirected	Fbxo32	Olfr975
MMT00063550	MMT00004176	0.174166	undirected	Fbxo32	Cybb
MMT00063550	MMT00044885	0.0268274	undirected	Fbxo32	Capn9
MMT00063550	MMT00071233	0.0541163	undirected	Fbxo32	Pou2af1
MMT00063550	MMT00017138	0.0204864	undirected	Fbxo32	Myo3a
MMT00063550	MMT00009424	0.0539717	undirected	Fbxo32	Traf2
MMT00063550	MMT00010285	0.165863	undirected	Fbxo32	Pzp
MMT00063550	MMT00021948	0.0389898	undirected	Fbxo32	Sf3a2
MMT00063550	MMT00078069	0.132234	undirected	Fbxo32	1810010H24Rik
MMT00063550	MMT00037199	0.0828969	undirected	Fbxo32	Adcy9
MMT00063550	MMT00038396	0.0221782	undirected	Fbxo32	Bglap2
MMT00063550	MMT00006323	0.0345775	undirected	Fbxo32	Ache
MMT00063550	MMT00022784	0.171503	undirected	Fbxo32	Usp18
MMT00063550	MMT00003475	0.107946	undirected	Fbxo32	Alg12
MMT00063550	MMT00026973	0.15683	undirected	Fbxo32	Mx1
MMT00063550	MMT00020871	0.0483508	undirected	Fbxo32	Fcer1a
MMT00063550	MMT00081348	0.254537	undirected	Fbxo32	Myo1f
MMT00063550	MMT00081727	0.0331032	undirected	Fbxo32	Tbc1d12
MMT00063550	MMT00043936	0.183741	undirected	Fbxo32	Cd48
MMT00063550	MMT00018014	0.069483	undirected	Fbxo32	Pard6g
MMT00063550	MMT00031488	0.193122	undirected	Fbxo32	Sorl1
MMT00063550	MMT00046154	0.0227307	undirected	Fbxo32	9330182L06Rik
MMT00063550	MMT00056668	0.06091	undirected	Fbxo32	Ccl28
MMT00063550	MMT00069732	0.0438012	undirected	Fbxo32	Calb1
MMT00063550	MMT00049304	0.271859	undirected	Fbxo32	Cyp3a13
MMT00063550	MMT00037740	0.107507	undirected	Fbxo32	Ptpro
MMT00063550	MMT00078782	0.0244773	undirected	Fbxo32	Mpp2
MMT00063550	MMT00026943	0.0429883	undirected	Fbxo32	Rorb
MMT00063550	MMT00014106	0.0881	undirected	Fbxo32	4933400C23
MMT00063550	MMT00000760	0.0281366	undirected	Fbxo32	Tcrb-J
MMT00063550	MMT00071842	0.0737508	undirected	Fbxo32	Prrx2
MMT00063550	MMT00007073	0.0657198	undirected	Fbxo32	Lrrc2
MMT00063550	MMT00038361	0.0911345	undirected	Fbxo32	Tgfbr3
MMT00063550	MMT00035279	0.0301221	undirected	Fbxo32	Fez1
MMT00063550	MMT00061212	0.0434897	undirected	Fbxo32	Ccnd1
MMT00063550	MMT00082175	0.0733143	undirected	Fbxo32	Cdh3
MMT00063550	MMT00070310	0.0658422	undirected	Fbxo32	Kctd12
MMT00063550	MMT00046734	0.206904	undirected	Fbxo32	Sardh
MMT00063550	MMT00038451	0.0638993	undirected	Fbxo32	4930417G10Rik
MMT00063550	MMT00020883	0.128812	undirected	Fbxo32	Kit
MMT00037979	MMT00027193	0.0292657	undirected	Upk1b	Arid2
MMT00037979	MMT00018843	0.0782389	undirected	Upk1b	1600029D21Rik
MMT00037979	MMT00059280	0.027817	undirected	Upk1b	Coch
MMT00037979	MMT00063533	0.0264736	undirected	Upk1b	Ms4a4b
MMT00037979	MMT00010083	0.023327	undirected	Upk1b	Cyp4f15
MMT00037979	MMT00033205	0.0294074	undirected	Upk1b	Cst7
MMT00037979	MMT00048973	0.0630483	undirected	Upk1b	Mcpt4
MMT00037979	MMT00018127	0.020604	undirected	Upk1b	Ntn1
MMT00037979	MMT00012338	0.0507304	undirected	Upk1b	Ptgfrn
MMT00037979	MMT00009429	0.0269333	undirected	Upk1b	Serpinb13
MMT00037979	MMT00012971	0.0301491	undirected	Upk1b	Mgst2
MMT00037979	MMT00015542	0.0397765	undirected	Upk1b	Pkp1
MMT00037979	MMT00027774	0.0453823	undirected	Upk1b	Kcne1l
MMT00037979	MMT00082385	0.022688	undirected	Upk1b	Nme4
MMT00037979	MMT00031654	0.0534043	undirected	Upk1b	Hs6st1
MMT00037979	MMT00030541	0.0320349	undirected	Upk1b	Gdf10
MMT00037979	MMT00018095	0.0228174	undirected	Upk1b	Gk2
MMT00037979	MMT00012342	0.0561508	undirected	Upk1b	Adcy1
MMT00037979	MMT00080603	0.146404	undirected	Upk1b	Anxa8
MMT00037979	MMT00068279	0.0453905	undirected	Upk1b	Fmod
MMT00037979	MMT00031546	0.042259	undirected	Upk1b	Cpa3
MMT00037979	MMT00059295	0.127754	undirected	Upk1b	Cab39
MMT00037979	MMT00030162	0.0295283	undirected	Upk1b	Trpv5
MMT00037979	MMT00079309	0.0761017	undirected	Upk1b	Exo1
MMT00037979	MMT00079541	0.0840066	undirected	Upk1b	Pi15
MMT00037979	MMT00025100	0.0292384	undirected	Upk1b	Sppl3
MMT00037979	MMT00019015	0.020415	undirected	Upk1b	Dpys
MMT00037979	MMT00055921	0.0255214	undirected	Upk1b	Retnla
MMT00037979	MMT00025515	0.084238	undirected	Upk1b	Crym
MMT00037979	MMT00044207	0.0272768	undirected	Upk1b	Kctd16
MMT00037979	MMT00037697	0.0781525	undirected	Upk1b	Acr
MMT00037979	MMT00039835	0.040477	undirected	Upk1b	Olfr575
MMT00037979	MMT00079011	0.0342859	undirected	Upk1b	Gmip
MMT00037979	MMT00017876	0.0209652	undirected	Upk1b	H2-DMb1
MMT00037979	MMT00011746	0.0572057	undirected	Upk1b	Plcb1
MMT00037979	MMT00000570	0.0278161	undirected	Upk1b	Ier3
MMT00037979	MMT00028633	0.0337129	undirected	Upk1b	Frzb
MMT00037979	MMT00028910	0.0309741	undirected	Upk1b	Cdh16
MMT00037979	MMT00060105	0.0219639	undirected	Upk1b	4933405O20Rik
MMT00037979	MMT00015355	0.0477946	undirected	Upk1b	Arg1
MMT00037979	MMT00029403	0.0212632	undirected	Upk1b	2010107G23Rik
MMT00037979	MMT00051144	0.0448358	undirected	Upk1b	Nid2
MMT00037979	MMT00018370	0.0306424	undirected	Upk1b	Csf3
MMT00037979	MMT00011158	0.0709063	undirected	Upk1b	Syt10
MMT00037979	MMT00067646	0.0504496	undirected	Upk1b	Ccl24
MMT00037979	MMT00058927	0.0431325	undirected	Upk1b	3110009E18Rik
MMT00037979	MMT00005022	0.0526359	undirected	Upk1b	1700025G04Rik
MMT00037979	MMT00014701	0.0514938	undirected	Upk1b	Cdon
MMT00037979	MMT00053670	0.0520531	undirected	Upk1b	Chn1
MMT00037979	MMT00082376	0.0571131	undirected	Upk1b	Scn1b
MMT00037979	MMT00069681	0.0281967	undirected	Upk1b	Tnnc2
MMT00037979	MMT00012212	0.0272353	undirected	Upk1b	Slc25a30
MMT00037979	MMT00049221	0.0961343	undirected	Upk1b	Hic1
MMT00037979	MMT00046994	0.0948565	undirected	Upk1b	Fads1
MMT00037979	MMT00080956	0.0345103	undirected	Upk1b	Doc2g
MMT00037979	MMT00073254	0.0237167	undirected	Upk1b	Tnfaip2
MMT00037979	MMT00022926	0.0496557	undirected	Upk1b	Myoc
MMT00037979	MMT00047914	0.0327887	undirected	Upk1b	Coq3
MMT00037979	MMT00011298	0.0768105	undirected	Upk1b	Scx
MMT00037979	MMT00011651	0.112959	undirected	Upk1b	Acsl6
MMT00037979	MMT00070222	0.0717253	undirected	Upk1b	Rasa4
MMT00037979	MMT00082736	0.0232655	undirected	Upk1b	4931428L18Rik
MMT00037979	MMT00059245	0.03674	undirected	Upk1b	Rarres1
MMT00037979	MMT00078249	0.0988846	undirected	Upk1b	Pcdhb6
MMT00037979	MMT00002362	0.0292817	undirected	Upk1b	Fmnl1
MMT00037979	MMT00067186	0.0213394	undirected	Upk1b	Irf7
MMT00037979	MMT00026709	0.0765252	undirected	Upk1b	Vnn1
MMT00037979	MMT00005510	0.0435499	undirected	Upk1b	Ahsg
MMT00037979	MMT00027892	0.0910804	undirected	Upk1b	Mmp20
MMT00037979	MMT00049862	0.0284657	undirected	Upk1b	Pgc
MMT00037979	MMT00013511	0.0231172	undirected	Upk1b	Olfr1504
MMT00037979	MMT00047418	0.0439486	undirected	Upk1b	Gpnmb
MMT00037979	MMT00062400	0.0312241	undirected	Upk1b	Dpp7
MMT00037979	MMT00060589	0.0667263	undirected	Upk1b	Glra1
MMT00037979	MMT00015239	0.0274223	undirected	Upk1b	Gdap1
MMT00037979	MMT00033228	0.0203697	undirected	Upk1b	Ly86
MMT00037979	MMT00078239	0.0385724	undirected	Upk1b	Homer3
MMT00037979	MMT00027755	0.0254111	undirected	Upk1b	Mak
MMT00037979	MMT00055430	0.0402397	undirected	Upk1b	S100a3
MMT00037979	MMT00063470	0.0840259	undirected	Upk1b	Agxt
MMT00037979	MMT00030601	0.035481	undirected	Upk1b	Zfp287
MMT00037979	MMT00021946	0.0654288	undirected	Upk1b	Rfx4
MMT00037979	MMT00053102	0.0346515	undirected	Upk1b	Cacna2d3
MMT00037979	MMT00047610	0.159075	undirected	Upk1b	Cst9
MMT00037979	MMT00057059	0.0309273	undirected	Upk1b	P2rx7
MMT00037979	MMT00036564	0.0375869	undirected	Upk1b	Pik3cg
MMT00037979	MMT00071500	0.0289111	undirected	Upk1b	Mx2
MMT00037979	MMT00072394	0.020803	undirected	Upk1b	Trpc4
MMT00037979	MMT00010142	0.0608174	undirected	Upk1b	Sfrp2
MMT00037979	MMT00036250	0.0273797	undirected	Upk1b	Ankrd1
MMT00037979	MMT00008784	0.0636581	undirected	Upk1b	Hspa8
MMT00037979	MMT00054409	0.0825895	undirected	Upk1b	Dbnl
MMT00037979	MMT00069620	0.0239029	undirected	Upk1b	Nova1
MMT00037979	MMT00044361	0.126555	undirected	Upk1b	Plekhb2
MMT00037979	MMT00060215	0.0217137	undirected	Upk1b	Pln
MMT00037979	MMT00024264	0.0323596	undirected	Upk1b	Alms1
MMT00037979	MMT00029598	0.0674333	undirected	Upk1b	Uchl1
MMT00037979	MMT00019749	0.024716	undirected	Upk1b	Dach2
MMT00037979	MMT00065768	0.0913822	undirected	Upk1b	Igfbp4
MMT00037979	MMT00051022	0.0370221	undirected	Upk1b	Fgd2
MMT00037979	MMT00069165	0.081103	undirected	Upk1b	Fbln5
MMT00037979	MMT00060813	0.0294009	undirected	Upk1b	Sdc3
MMT00037979	MMT00077777	0.0666448	undirected	Upk1b	4932414N04Rik
MMT00037979	MMT00026998	0.0315935	undirected	Upk1b	2210020M01Rik
MMT00037979	MMT00030373	0.0410563	undirected	Upk1b	Crlf1
MMT00037979	MMT00065883	0.031495	undirected	Upk1b	Foxn2
MMT00037979	MMT00036723	0.0207257	undirected	Upk1b	Slc9a9
MMT00037979	MMT00000131	0.0401773	undirected	Upk1b	Cntn6
MMT00037979	MMT00020772	0.159678	undirected	Upk1b	Ctdsp2
MMT00037979	MMT00048155	0.0416129	undirected	Upk1b	Slpi
MMT00037979	MMT00053034	0.0995392	undirected	Upk1b	Kif1a
MMT00037979	MMT00036955	0.108087	undirected	Upk1b	Jrk
MMT00037979	MMT00005957	0.038972	undirected	Upk1b	Cpxm2
MMT00037979	MMT00025067	0.0273726	undirected	Upk1b	Rgs18
MMT00037979	MMT00056571	0.067422	undirected	Upk1b	BC026585
MMT00037979	MMT00068584	0.0410026	undirected	Upk1b	Bid
MMT00037979	MMT00068509	0.0369704	undirected	Upk1b	Oit3
MMT00037979	MMT00016365	0.0323462	undirected	Upk1b	Sncaip
MMT00037979	MMT00054808	0.0326632	undirected	Upk1b	Csf1r
MMT00037979	MMT00006988	0.0450981	undirected	Upk1b	Olig1
MMT00037979	MMT00040864	0.0423133	undirected	Upk1b	Chst2
MMT00037979	MMT00065750	0.0613622	undirected	Upk1b	Pdxp
MMT00037979	MMT00029323	0.0320249	undirected	Upk1b	Htr1a
MMT00037979	MMT00037375	0.0960128	undirected	Upk1b	Skiv2l
MMT00037979	MMT00011577	0.0269361	undirected	Upk1b	Il28ra
MMT00037979	MMT00016680	0.0792655	undirected	Upk1b	Aamp
MMT00037979	MMT00040374	0.0575581	undirected	Upk1b	Trim9
MMT00037979	MMT00049364	0.0615124	undirected	Upk1b	Kbtbd10
MMT00037979	MMT00039970	0.0578264	undirected	Upk1b	Pak1
MMT00037979	MMT00031882	0.0200199	undirected	Upk1b	4933402N03Rik
MMT00037979	MMT00010449	0.0515258	undirected	Upk1b	Cacng5
MMT00037979	MMT00080573	0.0240823	undirected	Upk1b	Rtn4rl1
MMT00037979	MMT00005428	0.0757366	undirected	Upk1b	D430019H16Rik
MMT00037979	MMT00061075	0.0516159	undirected	Upk1b	Arid3a
MMT00037979	MMT00000368	0.0259639	undirected	Upk1b	Spry1
MMT00037979	MMT00080083	0.165612	undirected	Upk1b	Wt1
MMT00037979	MMT00064107	0.0809526	undirected	Upk1b	Mlana
MMT00037979	MMT00010362	0.0361321	undirected	Upk1b	Grb10
MMT00037979	MMT00045272	0.0706928	undirected	Upk1b	Etv4
MMT00037979	MMT00036749	0.0477318	undirected	Upk1b	1190002N15Rik
MMT00037979	MMT00079222	0.05147	undirected	Upk1b	Cntn1
MMT00037979	MMT00080633	0.0454619	undirected	Upk1b	Cxcr6
MMT00037979	MMT00037447	0.0230045	undirected	Upk1b	Trem2
MMT00037979	MMT00019490	0.0324163	undirected	Upk1b	Folh1
MMT00037979	MMT00073624	0.0386944	undirected	Upk1b	Hcrtr1
MMT00037979	MMT00015288	0.0239848	undirected	Upk1b	1700015G11Rik
MMT00037979	MMT00013893	0.138672	undirected	Upk1b	Cyp2s1
MMT00037979	MMT00072852	0.129076	undirected	Upk1b	Bai2
MMT00037979	MMT00000777	0.0576584	undirected	Upk1b	F3
MMT00037979	MMT00031183	0.0716546	undirected	Upk1b	Mdk
MMT00037979	MMT00006677	0.037912	undirected	Upk1b	Clic3
MMT00037979	MMT00017740	0.021424	undirected	Upk1b	Vps52
MMT00037979	MMT00001955	0.0440742	undirected	Upk1b	Olfr1265
MMT00037979	MMT00009954	0.0268248	undirected	Upk1b	Olfr470
MMT00037979	MMT00060429	0.058537	undirected	Upk1b	Olfr1052
MMT00037979	MMT00025169	0.0528201	undirected	Upk1b	Insrr
MMT00037979	MMT00048637	0.0731209	undirected	Upk1b	Crybb3
MMT00037979	MMT00070418	0.0345067	undirected	Upk1b	Adra2c
MMT00037979	MMT00005482	0.0542309	undirected	Upk1b	Ibsp
MMT00037979	MMT00078815	0.0771543	undirected	Upk1b	Ptprf
MMT00037979	MMT00008186	0.0358711	undirected	Upk1b	Ubtf
MMT00037979	MMT00027378	0.0523287	undirected	Upk1b	Itih3
MMT00037979	MMT00001160	0.129062	undirected	Upk1b	1500009C09Rik
MMT00037979	MMT00016783	0.0517007	undirected	Upk1b	Podn
MMT00037979	MMT00022777	0.0438415	undirected	Upk1b	C530028O21Rik
MMT00037979	MMT00012502	0.0623567	undirected	Upk1b	Ass1
MMT00037979	MMT00031281	0.0263082	undirected	Upk1b	Il3ra
MMT00037979	MMT00004123	0.0560628	undirected	Upk1b	Cdkn2a
MMT00037979	MMT00068712	0.0333665	undirected	Upk1b	Fcgr1
MMT00037979	MMT00064871	0.066265	undirected	Upk1b	Oxtr
MMT00037979	MMT00006013	0.0516253	undirected	Upk1b	Gjb3
MMT00037979	MMT00029984	0.051038	undirected	Upk1b	Sema5a
MMT00037979	MMT00026736	0.0227881	undirected	Upk1b	Olfr24
MMT00037979	MMT00006432	0.154495	undirected	Upk1b	Il17re
MMT00037979	MMT00021150	0.0257871	undirected	Upk1b	Prosapip1
MMT00037979	MMT00006067	0.0397177	undirected	Upk1b	Adra2a
MMT00037979	MMT00072686	0.0666419	undirected	Upk1b	Enpp5
MMT00037979	MMT00044934	0.0212291	undirected	Upk1b	Olfr729
MMT00037979	MMT00015631	0.038668	undirected	Upk1b	Atp1a3
MMT00037979	MMT00022494	0.121807	undirected	Upk1b	Slc22a18
MMT00037979	MMT00080177	0.0243334	undirected	Upk1b	Gzmk
MMT00037979	MMT00048340	0.0402461	undirected	Upk1b	Efemp1
MMT00037979	MMT00080684	0.0572555	undirected	Upk1b	BC013712
MMT00037979	MMT00067079	0.0643861	undirected	Upk1b	Fetub
MMT00037979	MMT00026944	0.0688471	undirected	Upk1b	Igfbp2
MMT00037979	MMT00059847	0.0770273	undirected	Upk1b	Ngb
MMT00037979	MMT00015950	0.02028	undirected	Upk1b	Cnksr2
MMT00037979	MMT00019014	0.03407	undirected	Upk1b	Yars
MMT00037979	MMT00035020	0.0703579	undirected	Upk1b	Prkar1b
MMT00037979	MMT00049504	0.0507754	undirected	Upk1b	Slc6a4
MMT00037979	MMT00074183	0.0355231	undirected	Upk1b	Wrb
MMT00037979	MMT00073625	0.0497055	undirected	Upk1b	A230065H16Rik
MMT00037979	MMT00045159	0.0470283	undirected	Upk1b	Cbs
MMT00037979	MMT00068444	0.022053	undirected	Upk1b	Prnd
MMT00037979	MMT00008639	0.0267758	undirected	Upk1b	Olfr975
MMT00037979	MMT00044885	0.0321781	undirected	Upk1b	Capn9
MMT00037979	MMT00028197	0.0243065	undirected	Upk1b	4930438A08Rik
MMT00037979	MMT00029202	0.058567	undirected	Upk1b	Rgs7
MMT00037979	MMT00021948	0.0410976	undirected	Upk1b	Sf3a2
MMT00037979	MMT00037199	0.0297078	undirected	Upk1b	Adcy9
MMT00037979	MMT00006323	0.145448	undirected	Upk1b	Ache
MMT00037979	MMT00033506	0.0206755	undirected	Upk1b	4632427E13Rik
MMT00037979	MMT00026973	0.0791769	undirected	Upk1b	Mx1
MMT00037979	MMT00020871	0.0740666	undirected	Upk1b	Fcer1a
MMT00037979	MMT00081348	0.0327695	undirected	Upk1b	Myo1f
MMT00037979	MMT00018014	0.0541364	undirected	Upk1b	Pard6g
MMT00037979	MMT00031488	0.0483384	undirected	Upk1b	Sorl1
MMT00037979	MMT00046154	0.0643377	undirected	Upk1b	9330182L06Rik
MMT00037979	MMT00032750	0.129178	undirected	Upk1b	Atp1b4
MMT00037979	MMT00031340	0.101255	undirected	Upk1b	Nfasc
MMT00037979	MMT00069732	0.0769306	undirected	Upk1b	Calb1
MMT00037979	MMT00049304	0.0298833	undirected	Upk1b	Cyp3a13
MMT00037979	MMT00078782	0.17267	undirected	Upk1b	Mpp2
MMT00037979	MMT00048579	0.0542995	undirected	Upk1b	Nrap
MMT00037979	MMT00015455	0.0220291	undirected	Upk1b	4930550C17Rik
MMT00037979	MMT00036143	0.0238164	undirected	Upk1b	Glipr2
MMT00037979	MMT00000760	0.0513276	undirected	Upk1b	Tcrb-J
MMT00037979	MMT00071842	0.0306571	undirected	Upk1b	Prrx2
MMT00037979	MMT00038361	0.103959	undirected	Upk1b	Tgfbr3
MMT00037979	MMT00035279	0.066238	undirected	Upk1b	Fez1
MMT00037979	MMT00053906	0.147524	undirected	Upk1b	Hao1
MMT00037979	MMT00061212	0.0311598	undirected	Upk1b	Ccnd1
MMT00037979	MMT00082175	0.0706436	undirected	Upk1b	Cdh3
MMT00037979	MMT00070310	0.0805738	undirected	Upk1b	Kctd12
MMT00037979	MMT00046734	0.066101	undirected	Upk1b	Sardh
MMT00037979	MMT00038451	0.0571762	undirected	Upk1b	4930417G10Rik
MMT00027193	MMT00018843	0.0705561	undirected	Arid2	1600029D21Rik
MMT00027193	MMT00059280	0.075963	undirected	Arid2	Coch
MMT00027193	MMT00063533	0.088419	undirected	Arid2	Ms4a4b
MMT00027193	MMT00010083	0.0326767	undirected	Arid2	Cyp4f15
MMT00027193	MMT00033205	0.102471	undirected	Arid2	Cst7
MMT00027193	MMT00079177	0.0256492	undirected	Arid2	Card14
MMT00027193	MMT00048973	0.0559529	undirected	Arid2	Mcpt4
MMT00027193	MMT00018127	0.132785	undirected	Arid2	Ntn1
MMT00027193	MMT00012338	0.110631	undirected	Arid2	Ptgfrn
MMT00027193	MMT00009429	0.0870696	undirected	Arid2	Serpinb13
MMT00027193	MMT00012971	0.0624018	undirected	Arid2	Mgst2
MMT00027193	MMT00015542	0.0394703	undirected	Arid2	Pkp1
MMT00027193	MMT00027774	0.0481673	undirected	Arid2	Kcne1l
MMT00027193	MMT00082385	0.0807201	undirected	Arid2	Nme4
MMT00027193	MMT00031654	0.0771511	undirected	Arid2	Hs6st1
MMT00027193	MMT00030404	0.0331896	undirected	Arid2	C1qa
MMT00027193	MMT00081212	0.153173	undirected	Arid2	Slfn4
MMT00027193	MMT00030541	0.0262647	undirected	Arid2	Gdf10
MMT00027193	MMT00011648	0.0394363	undirected	Arid2	Rem2
MMT00027193	MMT00018095	0.0326757	undirected	Arid2	Gk2
MMT00027193	MMT00012342	0.030777	undirected	Arid2	Adcy1
MMT00027193	MMT00082420	0.03181	undirected	Arid2	Cd83
MMT00027193	MMT00080603	0.0702358	undirected	Arid2	Anxa8
MMT00027193	MMT00068279	0.0359418	undirected	Arid2	Fmod
MMT00027193	MMT00059097	0.0365649	undirected	Arid2	Sc4mol
MMT00027193	MMT00072505	0.0848921	undirected	Arid2	Abp1
MMT00027193	MMT00031546	0.0500758	undirected	Arid2	Cpa3
MMT00027193	MMT00059295	0.10606	undirected	Arid2	Cab39
MMT00027193	MMT00045956	0.058943	undirected	Arid2	Il10ra
MMT00027193	MMT00030162	0.0687286	undirected	Arid2	Trpv5
MMT00027193	MMT00079309	0.083272	undirected	Arid2	Exo1
MMT00027193	MMT00079541	0.0525089	undirected	Arid2	Pi15
MMT00027193	MMT00025100	0.0255869	undirected	Arid2	Sppl3
MMT00027193	MMT00044688	0.172809	undirected	Arid2	Akr1c12
MMT00027193	MMT00019015	0.0593603	undirected	Arid2	Dpys
MMT00027193	MMT00063663	0.0276203	undirected	Arid2	Rgs1
MMT00027193	MMT00023471	0.0408435	undirected	Arid2	Tyrobp
MMT00027193	MMT00044207	0.111198	undirected	Arid2	Kctd16
MMT00027193	MMT00037697	0.0382106	undirected	Arid2	Acr
MMT00027193	MMT00039835	0.0333464	undirected	Arid2	Olfr575
MMT00027193	MMT00079011	0.0826423	undirected	Arid2	Gmip
MMT00027193	MMT00017876	0.0960786	undirected	Arid2	H2-DMb1
MMT00027193	MMT00011746	0.0357442	undirected	Arid2	Plcb1
MMT00027193	MMT00028633	0.0699575	undirected	Arid2	Frzb
MMT00027193	MMT00028910	0.0384387	undirected	Arid2	Cdh16
MMT00027193	MMT00055270	0.0308949	undirected	Arid2	Ifitm6
MMT00027193	MMT00029403	0.17303	undirected	Arid2	2010107G23Rik
MMT00027193	MMT00018370	0.0770184	undirected	Arid2	Csf3
MMT00027193	MMT00011158	0.0978897	undirected	Arid2	Syt10
MMT00027193	MMT00034980	0.0305976	undirected	Arid2	4833427G06Rik
MMT00027193	MMT00005022	0.0406355	undirected	Arid2	1700025G04Rik
MMT00027193	MMT00042972	0.0927225	undirected	Arid2	Aox1
MMT00027193	MMT00014701	0.0506133	undirected	Arid2	Cdon
MMT00027193	MMT00053670	0.112293	undirected	Arid2	Chn1
MMT00027193	MMT00078723	0.0202217	undirected	Arid2	Mmp2
MMT00027193	MMT00049421	0.114526	undirected	Arid2	Cd79b
MMT00027193	MMT00012907	0.147233	undirected	Arid2	Rest
MMT00027193	MMT00067789	0.0251044	undirected	Arid2	Svs5
MMT00027193	MMT00069681	0.138291	undirected	Arid2	Tnnc2
MMT00027193	MMT00012212	0.064847	undirected	Arid2	Slc25a30
MMT00027193	MMT00049221	0.0672694	undirected	Arid2	Hic1
MMT00027193	MMT00046994	0.0385389	undirected	Arid2	Fads1
MMT00027193	MMT00080956	0.0481224	undirected	Arid2	Doc2g
MMT00027193	MMT00054089	0.0641295	undirected	Arid2	Itgb7
MMT00027193	MMT00022926	0.0335979	undirected	Arid2	Myoc
MMT00027193	MMT00011651	0.0414061	undirected	Arid2	Acsl6
MMT00027193	MMT00082736	0.0522024	undirected	Arid2	4931428L18Rik
MMT00027193	MMT00059245	0.0387942	undirected	Arid2	Rarres1
MMT00027193	MMT00078249	0.0279179	undirected	Arid2	Pcdhb6
MMT00027193	MMT00002362	0.0315082	undirected	Arid2	Fmnl1
MMT00027193	MMT00067186	0.0675146	undirected	Arid2	Irf7
MMT00027193	MMT00026709	0.121469	undirected	Arid2	Vnn1
MMT00027193	MMT00005510	0.036034	undirected	Arid2	Ahsg
MMT00027193	MMT00027892	0.0546149	undirected	Arid2	Mmp20
MMT00027193	MMT00049862	0.080487	undirected	Arid2	Pgc
MMT00027193	MMT00070618	0.050907	undirected	Arid2	Npl
MMT00027193	MMT00014165	0.137878	undirected	Arid2	Klhl6
MMT00027193	MMT00013511	0.0783311	undirected	Arid2	Olfr1504
MMT00027193	MMT00047418	0.0255902	undirected	Arid2	Gpnmb
MMT00027193	MMT00060589	0.0471219	undirected	Arid2	Glra1
MMT00027193	MMT00034690	0.0226748	undirected	Arid2	Dok2
MMT00027193	MMT00048836	0.0222247	undirected	Arid2	Ear11
MMT00027193	MMT00060071	0.0616243	undirected	Arid2	Hpgd
MMT00027193	MMT00015239	0.0455986	undirected	Arid2	Gdap1
MMT00027193	MMT00033228	0.0716362	undirected	Arid2	Ly86
MMT00027193	MMT00078239	0.0405249	undirected	Arid2	Homer3
MMT00027193	MMT00009738	0.109429	undirected	Arid2	Ropn1
MMT00027193	MMT00027755	0.046891	undirected	Arid2	Mak
MMT00027193	MMT00055430	0.0725666	undirected	Arid2	S100a3
MMT00027193	MMT00063470	0.0357386	undirected	Arid2	Agxt
MMT00027193	MMT00021096	0.108352	undirected	Arid2	H2-DMa
MMT00027193	MMT00057404	0.139855	undirected	Arid2	Prss12
MMT00027193	MMT00037025	0.0362151	undirected	Arid2	Bmper
MMT00027193	MMT00030601	0.0950422	undirected	Arid2	Zfp287
MMT00027193	MMT00021946	0.0459877	undirected	Arid2	Rfx4
MMT00027193	MMT00047610	0.0221024	undirected	Arid2	Cst9
MMT00027193	MMT00057059	0.0201791	undirected	Arid2	P2rx7
MMT00027193	MMT00036564	0.0929722	undirected	Arid2	Pik3cg
MMT00027193	MMT00071500	0.046353	undirected	Arid2	Mx2
MMT00027193	MMT00010142	0.0744593	undirected	Arid2	Sfrp2
MMT00027193	MMT00076717	0.0609831	undirected	Arid2	Diap3
MMT00027193	MMT00080352	0.0435584	undirected	Arid2	Fdft1
MMT00027193	MMT00075488	0.0474506	undirected	Arid2	Slc35d1
MMT00027193	MMT00022062	0.0204545	undirected	Arid2	Col13a1
MMT00027193	MMT00037307	0.0744184	undirected	Arid2	Cpa4
MMT00027193	MMT00054409	0.0758064	undirected	Arid2	Dbnl
MMT00027193	MMT00043465	0.0530816	undirected	Arid2	1700011F03Rik
MMT00027193	MMT00069620	0.0701121	undirected	Arid2	Nova1
MMT00027193	MMT00031333	0.022842	undirected	Arid2	Pcdhb13
MMT00027193	MMT00060215	0.0670926	undirected	Arid2	Pln
MMT00027193	MMT00024264	0.0388682	undirected	Arid2	Alms1
MMT00027193	MMT00019749	0.112746	undirected	Arid2	Dach2
MMT00027193	MMT00033072	0.133483	undirected	Arid2	Rnf103
MMT00027193	MMT00065768	0.0488749	undirected	Arid2	Igfbp4
MMT00027193	MMT00051022	0.0950383	undirected	Arid2	Fgd2
MMT00027193	MMT00069165	0.0597416	undirected	Arid2	Fbln5
MMT00027193	MMT00060813	0.0656915	undirected	Arid2	Sdc3
MMT00027193	MMT00077777	0.032505	undirected	Arid2	4932414N04Rik
MMT00027193	MMT00026998	0.0301187	undirected	Arid2	2210020M01Rik
MMT00027193	MMT00065883	0.0383826	undirected	Arid2	Foxn2
MMT00027193	MMT00067082	0.0676661	undirected	Arid2	Chrna4
MMT00027193	MMT00036723	0.034165	undirected	Arid2	Slc9a9
MMT00027193	MMT00060597	0.0615084	undirected	Arid2	Bpgm
MMT00027193	MMT00000131	0.0223529	undirected	Arid2	Cntn6
MMT00027193	MMT00020772	0.0938823	undirected	Arid2	Ctdsp2
MMT00027193	MMT00050965	0.0626023	undirected	Arid2	Slc15a3
MMT00027193	MMT00053034	0.0214425	undirected	Arid2	Kif1a
MMT00027193	MMT00036955	0.0540327	undirected	Arid2	Jrk
MMT00027193	MMT00016676	0.0383565	undirected	Arid2	Kcnk5
MMT00027193	MMT00025067	0.0271088	undirected	Arid2	Rgs18
MMT00027193	MMT00056571	0.129977	undirected	Arid2	BC026585
MMT00027193	MMT00038375	0.170226	undirected	Arid2	AW146020
MMT00027193	MMT00012541	0.0422798	undirected	Arid2	Lcp1
MMT00027193	MMT00068584	0.0231393	undirected	Arid2	Bid
MMT00027193	MMT00068509	0.0504059	undirected	Arid2	Oit3
MMT00027193	MMT00005653	0.0312083	undirected	Arid2	Ccr5
MMT00027193	MMT00016365	0.0538066	undirected	Arid2	Sncaip
MMT00027193	MMT00054808	0.0659374	undirected	Arid2	Csf1r
MMT00027193	MMT00006988	0.100162	undirected	Arid2	Olig1
MMT00027193	MMT00040864	0.0216468	undirected	Arid2	Chst2
MMT00027193	MMT00065750	0.0631314	undirected	Arid2	Pdxp
MMT00027193	MMT00047171	0.0563387	undirected	Arid2	Icam1
MMT00027193	MMT00037375	0.12817	undirected	Arid2	Skiv2l
MMT00027193	MMT00011577	0.057471	undirected	Arid2	Il28ra
MMT00027193	MMT00016680	0.0385394	undirected	Arid2	Aamp
MMT00027193	MMT00040374	0.0279371	undirected	Arid2	Trim9
MMT00027193	MMT00000608	0.0456818	undirected	Arid2	Ccl5
MMT00027193	MMT00049364	0.0557746	undirected	Arid2	Kbtbd10
MMT00027193	MMT00039970	0.0348954	undirected	Arid2	Pak1
MMT00027193	MMT00029545	0.0239682	undirected	Arid2	Tob2
MMT00027193	MMT00001342	0.0381043	undirected	Arid2	Sertad3
MMT00027193	MMT00005231	0.0882799	undirected	Arid2	Tmie
MMT00027193	MMT00080573	0.0275185	undirected	Arid2	Rtn4rl1
MMT00027193	MMT00018141	0.0214329	undirected	Arid2	Pik3cd
MMT00027193	MMT00061075	0.0353411	undirected	Arid2	Arid3a
MMT00027193	MMT00080083	0.0403272	undirected	Arid2	Wt1
MMT00027193	MMT00064107	0.0314311	undirected	Arid2	Mlana
MMT00027193	MMT00010362	0.118623	undirected	Arid2	Grb10
MMT00027193	MMT00077072	0.0228809	undirected	Arid2	Olfr630
MMT00027193	MMT00036749	0.101911	undirected	Arid2	1190002N15Rik
MMT00027193	MMT00077375	0.0595457	undirected	Arid2	Cd68
MMT00027193	MMT00080633	0.0213311	undirected	Arid2	Cxcr6
MMT00027193	MMT00029329	0.0738046	undirected	Arid2	Ppfia4
MMT00027193	MMT00073624	0.0726577	undirected	Arid2	Hcrtr1
MMT00027193	MMT00015288	0.0529885	undirected	Arid2	1700015G11Rik
MMT00027193	MMT00079572	0.0951291	undirected	Arid2	9430091E24Rik
MMT00027193	MMT00043771	0.0308395	undirected	Arid2	Plek
MMT00027193	MMT00013893	0.0389575	undirected	Arid2	Cyp2s1
MMT00027193	MMT00072852	0.0514341	undirected	Arid2	Bai2
MMT00027193	MMT00073226	0.0452951	undirected	Arid2	Mycs
MMT00027193	MMT00064623	0.053426	undirected	Arid2	Abcc6
MMT00027193	MMT00077956	0.120096	undirected	Arid2	Ltbp2
MMT00027193	MMT00000777	0.0326834	undirected	Arid2	F3
MMT00027193	MMT00031183	0.0708295	undirected	Arid2	Mdk
MMT00027193	MMT00017992	0.119804	undirected	Arid2	Gsg1
MMT00027193	MMT00053446	0.0546871	undirected	Arid2	Ptges
MMT00027193	MMT00008854	0.114053	undirected	Arid2	H2-Q7
MMT00027193	MMT00006677	0.114293	undirected	Arid2	Clic3
MMT00027193	MMT00017740	0.0902933	undirected	Arid2	Vps52
MMT00027193	MMT00001955	0.0553491	undirected	Arid2	Olfr1265
MMT00027193	MMT00009954	0.119922	undirected	Arid2	Olfr470
MMT00027193	MMT00060429	0.0338463	undirected	Arid2	Olfr1052
MMT00027193	MMT00025169	0.0397067	undirected	Arid2	Insrr
MMT00027193	MMT00070418	0.0588392	undirected	Arid2	Adra2c
MMT00027193	MMT00041887	0.0392878	undirected	Arid2	Hcst
MMT00027193	MMT00020142	0.0226158	undirected	Arid2	Adam34
MMT00027193	MMT00006881	0.171194	undirected	Arid2	Pprc1
MMT00027193	MMT00008186	0.0543802	undirected	Arid2	Ubtf
MMT00027193	MMT00016989	0.119856	undirected	Arid2	Ifi47
MMT00027193	MMT00024553	0.0583771	undirected	Arid2	Cps1
MMT00027193	MMT00001160	0.0585476	undirected	Arid2	1500009C09Rik
MMT00027193	MMT00016783	0.053624	undirected	Arid2	Podn
MMT00027193	MMT00046600	0.053854	undirected	Arid2	Scn3b
MMT00027193	MMT00022777	0.0846895	undirected	Arid2	C530028O21Rik
MMT00027193	MMT00012502	0.0373135	undirected	Arid2	Ass1
MMT00027193	MMT00004123	0.0785902	undirected	Arid2	Cdkn2a
MMT00027193	MMT00068712	0.0983961	undirected	Arid2	Fcgr1
MMT00027193	MMT00064871	0.0553316	undirected	Arid2	Oxtr
MMT00027193	MMT00006013	0.062394	undirected	Arid2	Gjb3
MMT00027193	MMT00029984	0.124764	undirected	Arid2	Sema5a
MMT00027193	MMT00026736	0.0627221	undirected	Arid2	Olfr24
MMT00027193	MMT00006432	0.0350654	undirected	Arid2	Il17re
MMT00027193	MMT00021150	0.100925	undirected	Arid2	Prosapip1
MMT00027193	MMT00006067	0.062644	undirected	Arid2	Adra2a
MMT00027193	MMT00072686	0.0512905	undirected	Arid2	Enpp5
MMT00027193	MMT00033710	0.0440951	undirected	Arid2	Muc4
MMT00027193	MMT00044934	0.0204321	undirected	Arid2	Olfr729
MMT00027193	MMT00030138	0.140581	undirected	Arid2	Clcn1
MMT00027193	MMT00008072	0.109379	undirected	Arid2	Cabp5
MMT00027193	MMT00045480	0.0338631	undirected	Arid2	Gyk
MMT00027193	MMT00015631	0.0627363	undirected	Arid2	Atp1a3
MMT00027193	MMT00022494	0.0492978	undirected	Arid2	Slc22a18
MMT00027193	MMT00037781	0.0437021	undirected	Arid2	Gas7
MMT00027193	MMT00028683	0.165441	undirected	Arid2	Msx2
MMT00027193	MMT00048340	0.0379366	undirected	Arid2	Efemp1
MMT00027193	MMT00080684	0.095208	undirected	Arid2	BC013712
MMT00027193	MMT00067079	0.057061	undirected	Arid2	Fetub
MMT00027193	MMT00001806	0.03744	undirected	Arid2	Cd84
MMT00027193	MMT00036455	0.0730368	undirected	Arid2	G6pc2
MMT00027193	MMT00016669	0.0319278	undirected	Arid2	Gp49a
MMT00027193	MMT00002249	0.0203818	undirected	Arid2	Ank1
MMT00027193	MMT00059847	0.0418431	undirected	Arid2	Ngb
MMT00027193	MMT00015950	0.171166	undirected	Arid2	Cnksr2
MMT00027193	MMT00019014	0.0314771	undirected	Arid2	Yars
MMT00027193	MMT00035020	0.0400875	undirected	Arid2	Prkar1b
MMT00027193	MMT00049504	0.0275755	undirected	Arid2	Slc6a4
MMT00027193	MMT00074183	0.117836	undirected	Arid2	Wrb
MMT00027193	MMT00073625	0.0361096	undirected	Arid2	A230065H16Rik
MMT00027193	MMT00045159	0.0297662	undirected	Arid2	Cbs
MMT00027193	MMT00074216	0.0253782	undirected	Arid2	Cyp2b19
MMT00027193	MMT00068444	0.0244991	undirected	Arid2	Prnd
MMT00027193	MMT00008639	0.0393853	undirected	Arid2	Olfr975
MMT00027193	MMT00004176	0.0662677	undirected	Arid2	Cybb
MMT00027193	MMT00044885	0.0299855	undirected	Arid2	Capn9
MMT00027193	MMT00071233	0.0534116	undirected	Arid2	Pou2af1
MMT00027193	MMT00017138	0.065994	undirected	Arid2	Myo3a
MMT00027193	MMT00009424	0.033462	undirected	Arid2	Traf2
MMT00027193	MMT00010285	0.165809	undirected	Arid2	Pzp
MMT00027193	MMT00021948	0.0561363	undirected	Arid2	Sf3a2
MMT00027193	MMT00078069	0.0575733	undirected	Arid2	1810010H24Rik
MMT00027193	MMT00037199	0.0502571	undirected	Arid2	Adcy9
MMT00027193	MMT00006323	0.0311731	undirected	Arid2	Ache
MMT00027193	MMT00022784	0.136048	undirected	Arid2	Usp18
MMT00027193	MMT00003475	0.112761	undirected	Arid2	Alg12
MMT00027193	MMT00026973	0.177809	undirected	Arid2	Mx1
MMT00027193	MMT00020871	0.0578307	undirected	Arid2	Fcer1a
MMT00027193	MMT00081348	0.0998202	undirected	Arid2	Myo1f
MMT00027193	MMT00081727	0.0641662	undirected	Arid2	Tbc1d12
MMT00027193	MMT00018994	0.0919696	undirected	Arid2	Akp3
MMT00027193	MMT00043936	0.131257	undirected	Arid2	Cd48
MMT00027193	MMT00018014	0.0855116	undirected	Arid2	Pard6g
MMT00027193	MMT00031488	0.155786	undirected	Arid2	Sorl1
MMT00027193	MMT00032750	0.0338258	undirected	Arid2	Atp1b4
MMT00027193	MMT00056668	0.0632566	undirected	Arid2	Ccl28
MMT00027193	MMT00069732	0.0417412	undirected	Arid2	Calb1
MMT00027193	MMT00049304	0.122058	undirected	Arid2	Cyp3a13
MMT00027193	MMT00037740	0.0385493	undirected	Arid2	Ptpro
MMT00027193	MMT00078782	0.0497047	undirected	Arid2	Mpp2
MMT00027193	MMT00048579	0.0296594	undirected	Arid2	Nrap
MMT00027193	MMT00026943	0.0511135	undirected	Arid2	Rorb
MMT00027193	MMT00014106	0.0738387	undirected	Arid2	4933400C23
MMT00027193	MMT00015455	0.0202065	undirected	Arid2	4930550C17Rik
MMT00027193	MMT00000760	0.0422323	undirected	Arid2	Tcrb-J
MMT00027193	MMT00071842	0.107102	undirected	Arid2	Prrx2
MMT00027193	MMT00007073	0.0628261	undirected	Arid2	Lrrc2
MMT00027193	MMT00038361	0.0455656	undirected	Arid2	Tgfbr3
MMT00027193	MMT00035279	0.0441931	undirected	Arid2	Fez1
MMT00027193	MMT00053906	0.0207106	undirected	Arid2	Hao1
MMT00027193	MMT00082175	0.0504023	undirected	Arid2	Cdh3
MMT00027193	MMT00070310	0.0629596	undirected	Arid2	Kctd12
MMT00027193	MMT00046734	0.167078	undirected	Arid2	Sardh
MMT00027193	MMT00038451	0.0693505	undirected	Arid2	4930417G10Rik
MMT00027193	MMT00020883	0.13758	undirected	Arid2	Kit
MMT00018843	MMT00059280	0.198894	undirected	1600029D21Rik	Coch
MMT00018843	MMT00063533	0.0813567	undirected	1600029D21Rik	Ms4a4b
MMT00018843	MMT00010083	0.0368216	undirected	1600029D21Rik	Cyp4f15
MMT00018843	MMT00033205	0.0209703	undirected	1600029D21Rik	Cst7
MMT00018843	MMT00012362	0.0421593	undirected	1600029D21Rik	Fcna
MMT00018843	MMT00079177	0.138032	undirected	1600029D21Rik	Card14
MMT00018843	MMT00000858	0.0235545	undirected	1600029D21Rik	Lyl1
MMT00018843	MMT00048973	0.189621	undirected	1600029D21Rik	Mcpt4
MMT00018843	MMT00018127	0.0573498	undirected	1600029D21Rik	Ntn1
MMT00018843	MMT00012338	0.0738809	undirected	1600029D21Rik	Ptgfrn
MMT00018843	MMT00009429	0.162646	undirected	1600029D21Rik	Serpinb13
MMT00018843	MMT00012971	0.0636116	undirected	1600029D21Rik	Mgst2
MMT00018843	MMT00015542	0.0730112	undirected	1600029D21Rik	Pkp1
MMT00018843	MMT00027774	0.0979704	undirected	1600029D21Rik	Kcne1l
MMT00018843	MMT00067891	0.0606816	undirected	1600029D21Rik	Folr2
MMT00018843	MMT00082385	0.0789574	undirected	1600029D21Rik	Nme4
MMT00018843	MMT00031654	0.197017	undirected	1600029D21Rik	Hs6st1
MMT00018843	MMT00030404	0.0511762	undirected	1600029D21Rik	C1qa
MMT00018843	MMT00081212	0.0429099	undirected	1600029D21Rik	Slfn4
MMT00018843	MMT00030541	0.200324	undirected	1600029D21Rik	Gdf10
MMT00018843	MMT00011648	0.0729771	undirected	1600029D21Rik	Rem2
MMT00018843	MMT00012342	0.20105	undirected	1600029D21Rik	Adcy1
MMT00018843	MMT00082420	0.0673664	undirected	1600029D21Rik	Cd83
MMT00018843	MMT00080603	0.134497	undirected	1600029D21Rik	Anxa8
MMT00018843	MMT00068279	0.257758	undirected	1600029D21Rik	Fmod
MMT00018843	MMT00072505	0.0227434	undirected	1600029D21Rik	Abp1
MMT00018843	MMT00031546	0.12387	undirected	1600029D21Rik	Cpa3
MMT00018843	MMT00059295	0.0665166	undirected	1600029D21Rik	Cab39
MMT00018843	MMT00045956	0.0462366	undirected	1600029D21Rik	Il10ra
MMT00018843	MMT00079309	0.0293958	undirected	1600029D21Rik	Exo1
MMT00018843	MMT00079541	0.123431	undirected	1600029D21Rik	Pi15
MMT00018843	MMT00019015	0.055985	undirected	1600029D21Rik	Dpys
MMT00018843	MMT00034019	0.114843	undirected	1600029D21Rik	Ptgs2
MMT00018843	MMT00055921	0.100813	undirected	1600029D21Rik	Retnla
MMT00018843	MMT00063663	0.0804924	undirected	1600029D21Rik	Rgs1
MMT00018843	MMT00025515	0.0512878	undirected	1600029D21Rik	Crym
MMT00018843	MMT00044207	0.0330085	undirected	1600029D21Rik	Kctd16
MMT00018843	MMT00080429	0.0549447	undirected	1600029D21Rik	Slc15a2
MMT00018843	MMT00037697	0.115152	undirected	1600029D21Rik	Acr
MMT00018843	MMT00039835	0.0318989	undirected	1600029D21Rik	Olfr575
MMT00018843	MMT00079011	0.140722	undirected	1600029D21Rik	Gmip
MMT00018843	MMT00017876	0.111101	undirected	1600029D21Rik	H2-DMb1
MMT00018843	MMT00011746	0.185666	undirected	1600029D21Rik	Plcb1
MMT00018843	MMT00000570	0.134238	undirected	1600029D21Rik	Ier3
MMT00018843	MMT00028633	0.197412	undirected	1600029D21Rik	Frzb
MMT00018843	MMT00028910	0.107824	undirected	1600029D21Rik	Cdh16
MMT00018843	MMT00055270	0.0235498	undirected	1600029D21Rik	Ifitm6
MMT00018843	MMT00015355	0.0323525	undirected	1600029D21Rik	Arg1
MMT00018843	MMT00017475	0.0544542	undirected	1600029D21Rik	Atp8a2
MMT00018843	MMT00029403	0.0534799	undirected	1600029D21Rik	2010107G23Rik
MMT00018843	MMT00051144	0.0382576	undirected	1600029D21Rik	Nid2
MMT00018843	MMT00018370	0.0305536	undirected	1600029D21Rik	Csf3
MMT00018843	MMT00011158	0.0721445	undirected	1600029D21Rik	Syt10
MMT00018843	MMT00067646	0.0769233	undirected	1600029D21Rik	Ccl24
MMT00018843	MMT00058358	0.0282585	undirected	1600029D21Rik	1700093K21Rik
MMT00018843	MMT00034980	0.0434172	undirected	1600029D21Rik	4833427G06Rik
MMT00018843	MMT00005022	0.157376	undirected	1600029D21Rik	1700025G04Rik
MMT00018843	MMT00042972	0.0544801	undirected	1600029D21Rik	Aox1
MMT00018843	MMT00014701	0.0746817	undirected	1600029D21Rik	Cdon
MMT00018843	MMT00053670	0.113394	undirected	1600029D21Rik	Chn1
MMT00018843	MMT00078723	0.0798151	undirected	1600029D21Rik	Mmp2
MMT00018843	MMT00049421	0.0464693	undirected	1600029D21Rik	Cd79b
MMT00018843	MMT00082376	0.11828	undirected	1600029D21Rik	Scn1b
MMT00018843	MMT00012907	0.0278037	undirected	1600029D21Rik	Rest
MMT00018843	MMT00067789	0.114468	undirected	1600029D21Rik	Svs5
MMT00018843	MMT00069681	0.0413124	undirected	1600029D21Rik	Tnnc2
MMT00018843	MMT00012212	0.105931	undirected	1600029D21Rik	Slc25a30
MMT00018843	MMT00049221	0.211518	undirected	1600029D21Rik	Hic1
MMT00018843	MMT00046994	0.14663	undirected	1600029D21Rik	Fads1
MMT00018843	MMT00080956	0.0404634	undirected	1600029D21Rik	Doc2g
MMT00018843	MMT00054089	0.0402766	undirected	1600029D21Rik	Itgb7
MMT00018843	MMT00073254	0.11738	undirected	1600029D21Rik	Tnfaip2
MMT00018843	MMT00014082	0.0460363	undirected	1600029D21Rik	Slc6a18
MMT00018843	MMT00022926	0.239252	undirected	1600029D21Rik	Myoc
MMT00018843	MMT00047914	0.122516	undirected	1600029D21Rik	Coq3
MMT00018843	MMT00011298	0.143169	undirected	1600029D21Rik	Scx
MMT00018843	MMT00011651	0.184965	undirected	1600029D21Rik	Acsl6
MMT00018843	MMT00070222	0.180224	undirected	1600029D21Rik	Rasa4
MMT00018843	MMT00082736	0.115079	undirected	1600029D21Rik	4931428L18Rik
MMT00018843	MMT00059245	0.185607	undirected	1600029D21Rik	Rarres1
MMT00018843	MMT00078249	0.126213	undirected	1600029D21Rik	Pcdhb6
MMT00018843	MMT00026709	0.130771	undirected	1600029D21Rik	Vnn1
MMT00018843	MMT00005510	0.155576	undirected	1600029D21Rik	Ahsg
MMT00018843	MMT00027892	0.0561227	undirected	1600029D21Rik	Mmp20
MMT00018843	MMT00049862	0.0205192	undirected	1600029D21Rik	Pgc
MMT00018843	MMT00014165	0.0742588	undirected	1600029D21Rik	Klhl6
MMT00018843	MMT00013511	0.0670295	undirected	1600029D21Rik	Olfr1504
MMT00018843	MMT00047418	0.171603	undirected	1600029D21Rik	Gpnmb
MMT00018843	MMT00062400	0.0901768	undirected	1600029D21Rik	Dpp7
MMT00018843	MMT00060589	0.109204	undirected	1600029D21Rik	Glra1
MMT00018843	MMT00034690	0.044658	undirected	1600029D21Rik	Dok2
MMT00018843	MMT00048836	0.0488791	undirected	1600029D21Rik	Ear11
MMT00018843	MMT00060071	0.023405	undirected	1600029D21Rik	Hpgd
MMT00018843	MMT00015239	0.170065	undirected	1600029D21Rik	Gdap1
MMT00018843	MMT00033228	0.0251966	undirected	1600029D21Rik	Ly86
MMT00018843	MMT00078239	0.119156	undirected	1600029D21Rik	Homer3
MMT00018843	MMT00027755	0.035894	undirected	1600029D21Rik	Mak
MMT00018843	MMT00055430	0.0465161	undirected	1600029D21Rik	S100a3
MMT00018843	MMT00063470	0.0950494	undirected	1600029D21Rik	Agxt
MMT00018843	MMT00021096	0.0606747	undirected	1600029D21Rik	H2-DMa
MMT00018843	MMT00057404	0.0624487	undirected	1600029D21Rik	Prss12
MMT00018843	MMT00037025	0.160102	undirected	1600029D21Rik	Bmper
MMT00018843	MMT00030601	0.200356	undirected	1600029D21Rik	Zfp287
MMT00018843	MMT00021946	0.159375	undirected	1600029D21Rik	Rfx4
MMT00018843	MMT00053102	0.19946	undirected	1600029D21Rik	Cacna2d3
MMT00018843	MMT00047610	0.117554	undirected	1600029D21Rik	Cst9
MMT00018843	MMT00057059	0.151481	undirected	1600029D21Rik	P2rx7
MMT00018843	MMT00036564	0.0378409	undirected	1600029D21Rik	Pik3cg
MMT00018843	MMT00071500	0.165499	undirected	1600029D21Rik	Mx2
MMT00018843	MMT00072394	0.075097	undirected	1600029D21Rik	Trpc4
MMT00018843	MMT00010142	0.244495	undirected	1600029D21Rik	Sfrp2
MMT00018843	MMT00076717	0.0510519	undirected	1600029D21Rik	Diap3
MMT00018843	MMT00036250	0.0491565	undirected	1600029D21Rik	Ankrd1
MMT00018843	MMT00008784	0.150319	undirected	1600029D21Rik	Hspa8
MMT00018843	MMT00075488	0.0250291	undirected	1600029D21Rik	Slc35d1
MMT00018843	MMT00054409	0.0885776	undirected	1600029D21Rik	Dbnl
MMT00018843	MMT00043465	0.0540666	undirected	1600029D21Rik	1700011F03Rik
MMT00018843	MMT00069620	0.0266232	undirected	1600029D21Rik	Nova1
MMT00018843	MMT00031333	0.136178	undirected	1600029D21Rik	Pcdhb13
MMT00018843	MMT00079156	0.111843	undirected	1600029D21Rik	Ms4a4d
MMT00018843	MMT00044361	0.121974	undirected	1600029D21Rik	Plekhb2
MMT00018843	MMT00015096	0.0774196	undirected	1600029D21Rik	Slc6a15
MMT00018843	MMT00060215	0.0259488	undirected	1600029D21Rik	Pln
MMT00018843	MMT00024264	0.0815548	undirected	1600029D21Rik	Alms1
MMT00018843	MMT00029598	0.129161	undirected	1600029D21Rik	Uchl1
MMT00018843	MMT00019749	0.0369525	undirected	1600029D21Rik	Dach2
MMT00018843	MMT00033072	0.0459098	undirected	1600029D21Rik	Rnf103
MMT00018843	MMT00065768	0.170071	undirected	1600029D21Rik	Igfbp4
MMT00018843	MMT00051022	0.111343	undirected	1600029D21Rik	Fgd2
MMT00018843	MMT00076599	0.105566	undirected	1600029D21Rik	Ece2
MMT00018843	MMT00069165	0.177452	undirected	1600029D21Rik	Fbln5
MMT00018843	MMT00060813	0.0706088	undirected	1600029D21Rik	Sdc3
MMT00018843	MMT00077777	0.0969715	undirected	1600029D21Rik	4932414N04Rik
MMT00018843	MMT00081993	0.0852376	undirected	1600029D21Rik	Col8a1
MMT00018843	MMT00026998	0.0537239	undirected	1600029D21Rik	2210020M01Rik
MMT00018843	MMT00030373	0.0990862	undirected	1600029D21Rik	Crlf1
MMT00018843	MMT00065883	0.0674836	undirected	1600029D21Rik	Foxn2
MMT00018843	MMT00067082	0.0542397	undirected	1600029D21Rik	Chrna4
MMT00018843	MMT00013974	0.0398081	undirected	1600029D21Rik	Drd1a
MMT00018843	MMT00036723	0.0533613	undirected	1600029D21Rik	Slc9a9
MMT00018843	MMT00060597	0.11699	undirected	1600029D21Rik	Bpgm
MMT00018843	MMT00000131	0.161308	undirected	1600029D21Rik	Cntn6
MMT00018843	MMT00020772	0.126357	undirected	1600029D21Rik	Ctdsp2
MMT00018843	MMT00050965	0.0939144	undirected	1600029D21Rik	Slc15a3
MMT00018843	MMT00048155	0.0641712	undirected	1600029D21Rik	Slpi
MMT00018843	MMT00053034	0.205442	undirected	1600029D21Rik	Kif1a
MMT00018843	MMT00036955	0.209907	undirected	1600029D21Rik	Jrk
MMT00018843	MMT00005957	0.187609	undirected	1600029D21Rik	Cpxm2
MMT00018843	MMT00025067	0.0598533	undirected	1600029D21Rik	Rgs18
MMT00018843	MMT00056571	0.163672	undirected	1600029D21Rik	BC026585
MMT00018843	MMT00038375	0.0473934	undirected	1600029D21Rik	AW146020
MMT00018843	MMT00012541	0.0256908	undirected	1600029D21Rik	Lcp1
MMT00018843	MMT00068584	0.149499	undirected	1600029D21Rik	Bid
MMT00018843	MMT00068509	0.0217406	undirected	1600029D21Rik	Oit3
MMT00018843	MMT00005653	0.0318554	undirected	1600029D21Rik	Ccr5
MMT00018843	MMT00072526	0.050342	undirected	1600029D21Rik	Foxo6
MMT00018843	MMT00016365	0.0605703	undirected	1600029D21Rik	Sncaip
MMT00018843	MMT00054808	0.10876	undirected	1600029D21Rik	Csf1r
MMT00018843	MMT00006988	0.102883	undirected	1600029D21Rik	Olig1
MMT00018843	MMT00040864	0.04217	undirected	1600029D21Rik	Chst2
MMT00018843	MMT00065750	0.120504	undirected	1600029D21Rik	Pdxp
MMT00018843	MMT00029323	0.129965	undirected	1600029D21Rik	Htr1a
MMT00018843	MMT00047171	0.105564	undirected	1600029D21Rik	Icam1
MMT00018843	MMT00037375	0.223699	undirected	1600029D21Rik	Skiv2l
MMT00018843	MMT00011577	0.15954	undirected	1600029D21Rik	Il28ra
MMT00018843	MMT00016680	0.127869	undirected	1600029D21Rik	Aamp
MMT00018843	MMT00040374	0.0452821	undirected	1600029D21Rik	Trim9
MMT00018843	MMT00000608	0.0466212	undirected	1600029D21Rik	Ccl5
MMT00018843	MMT00049364	0.0329219	undirected	1600029D21Rik	Kbtbd10
MMT00018843	MMT00039970	0.240692	undirected	1600029D21Rik	Pak1
MMT00018843	MMT00001342	0.0234785	undirected	1600029D21Rik	Sertad3
MMT00018843	MMT00031882	0.110153	undirected	1600029D21Rik	4933402N03Rik
MMT00018843	MMT00010449	0.0957846	undirected	1600029D21Rik	Cacng5
MMT00018843	MMT00005231	0.020257	undirected	1600029D21Rik	Tmie
MMT00018843	MMT00080573	0.149556	undirected	1600029D21Rik	Rtn4rl1
MMT00018843	MMT00005428	0.0845872	undirected	1600029D21Rik	D430019H16Rik
MMT00018843	MMT00018141	0.0603627	undirected	1600029D21Rik	Pik3cd
MMT00018843	MMT00061075	0.0808837	undirected	1600029D21Rik	Arid3a
MMT00018843	MMT00000368	0.10353	undirected	1600029D21Rik	Spry1
MMT00018843	MMT00080083	0.101419	undirected	1600029D21Rik	Wt1
MMT00018843	MMT00064107	0.191058	undirected	1600029D21Rik	Mlana
MMT00018843	MMT00003243	0.0309908	undirected	1600029D21Rik	Lrrc4b
MMT00018843	MMT00010362	0.0792835	undirected	1600029D21Rik	Grb10
MMT00018843	MMT00045272	0.161288	undirected	1600029D21Rik	Etv4
MMT00018843	MMT00036749	0.0411878	undirected	1600029D21Rik	1190002N15Rik
MMT00018843	MMT00079222	0.0996651	undirected	1600029D21Rik	Cntn1
MMT00018843	MMT00077375	0.0718411	undirected	1600029D21Rik	Cd68
MMT00018843	MMT00080633	0.135093	undirected	1600029D21Rik	Cxcr6
MMT00018843	MMT00037447	0.0555075	undirected	1600029D21Rik	Trem2
MMT00018843	MMT00029329	0.0694223	undirected	1600029D21Rik	Ppfia4
MMT00018843	MMT00019490	0.142754	undirected	1600029D21Rik	Folh1
MMT00018843	MMT00073624	0.164265	undirected	1600029D21Rik	Hcrtr1
MMT00018843	MMT00015288	0.0937274	undirected	1600029D21Rik	1700015G11Rik
MMT00018843	MMT00079572	0.0873545	undirected	1600029D21Rik	9430091E24Rik
MMT00018843	MMT00043771	0.0236534	undirected	1600029D21Rik	Plek
MMT00018843	MMT00013893	0.0794179	undirected	1600029D21Rik	Cyp2s1
MMT00018843	MMT00072852	0.0678759	undirected	1600029D21Rik	Bai2
MMT00018843	MMT00064623	0.133172	undirected	1600029D21Rik	Abcc6
MMT00018843	MMT00077956	0.0576567	undirected	1600029D21Rik	Ltbp2
MMT00018843	MMT00000777	0.244184	undirected	1600029D21Rik	F3
MMT00018843	MMT00031183	0.260948	undirected	1600029D21Rik	Mdk
MMT00018843	MMT00053446	0.0292341	undirected	1600029D21Rik	Ptges
MMT00018843	MMT00019358	0.133135	undirected	1600029D21Rik	Tnr
MMT00018843	MMT00008854	0.0668839	undirected	1600029D21Rik	H2-Q7
MMT00018843	MMT00006677	0.0984651	undirected	1600029D21Rik	Clic3
MMT00018843	MMT00017740	0.0203335	undirected	1600029D21Rik	Vps52
MMT00018843	MMT00001955	0.0586544	undirected	1600029D21Rik	Olfr1265
MMT00018843	MMT00009954	0.0521406	undirected	1600029D21Rik	Olfr470
MMT00018843	MMT00060429	0.13227	undirected	1600029D21Rik	Olfr1052
MMT00018843	MMT00025169	0.1028	undirected	1600029D21Rik	Insrr
MMT00018843	MMT00048637	0.138139	undirected	1600029D21Rik	Crybb3
MMT00018843	MMT00070418	0.16841	undirected	1600029D21Rik	Adra2c
MMT00018843	MMT00005482	0.159731	undirected	1600029D21Rik	Ibsp
MMT00018843	MMT00054422	0.0721649	undirected	1600029D21Rik	Mrc1
MMT00018843	MMT00020142	0.0558499	undirected	1600029D21Rik	Adam34
MMT00018843	MMT00006881	0.0343887	undirected	1600029D21Rik	Pprc1
MMT00018843	MMT00078815	0.0883751	undirected	1600029D21Rik	Ptprf
MMT00018843	MMT00008186	0.0250779	undirected	1600029D21Rik	Ubtf
MMT00018843	MMT00047462	0.0632731	undirected	1600029D21Rik	Ttc12
MMT00018843	MMT00027378	0.158482	undirected	1600029D21Rik	Itih3
MMT00018843	MMT00024553	0.156501	undirected	1600029D21Rik	Cps1
MMT00018843	MMT00001160	0.0478774	undirected	1600029D21Rik	1500009C09Rik
MMT00018843	MMT00016783	0.0272645	undirected	1600029D21Rik	Podn
MMT00018843	MMT00046600	0.139289	undirected	1600029D21Rik	Scn3b
MMT00018843	MMT00022777	0.192031	undirected	1600029D21Rik	C530028O21Rik
MMT00018843	MMT00012502	0.218309	undirected	1600029D21Rik	Ass1
MMT00018843	MMT00031281	0.140681	undirected	1600029D21Rik	Il3ra
MMT00018843	MMT00004123	0.148254	undirected	1600029D21Rik	Cdkn2a
MMT00018843	MMT00068712	0.0689234	undirected	1600029D21Rik	Fcgr1
MMT00018843	MMT00010412	0.0571587	undirected	1600029D21Rik	Serpina1d
MMT00018843	MMT00056703	0.0699986	undirected	1600029D21Rik	Serpinb6b
MMT00018843	MMT00064871	0.0443324	undirected	1600029D21Rik	Oxtr
MMT00018843	MMT00007847	0.0731991	undirected	1600029D21Rik	Gal3st1
MMT00018843	MMT00006013	0.127861	undirected	1600029D21Rik	Gjb3
MMT00018843	MMT00029984	0.0283124	undirected	1600029D21Rik	Sema5a
MMT00018843	MMT00006432	0.187248	undirected	1600029D21Rik	Il17re
MMT00018843	MMT00021150	0.183046	undirected	1600029D21Rik	Prosapip1
MMT00018843	MMT00072686	0.168193	undirected	1600029D21Rik	Enpp5
MMT00018843	MMT00033710	0.0215047	undirected	1600029D21Rik	Muc4
MMT00018843	MMT00044934	0.0355994	undirected	1600029D21Rik	Olfr729
MMT00018843	MMT00030138	0.0650405	undirected	1600029D21Rik	Clcn1
MMT00018843	MMT00008072	0.155034	undirected	1600029D21Rik	Cabp5
MMT00018843	MMT00045480	0.0559631	undirected	1600029D21Rik	Gyk
MMT00018843	MMT00069832	0.0765176	undirected	1600029D21Rik	Mbd2
MMT00018843	MMT00015631	0.0589473	undirected	1600029D21Rik	Atp1a3
MMT00018843	MMT00022494	0.207414	undirected	1600029D21Rik	Slc22a18
MMT00018843	MMT00037781	0.0974795	undirected	1600029D21Rik	Gas7
MMT00018843	MMT00080177	0.0639854	undirected	1600029D21Rik	Gzmk
MMT00018843	MMT00028683	0.0577874	undirected	1600029D21Rik	Msx2
MMT00018843	MMT00048340	0.206023	undirected	1600029D21Rik	Efemp1
MMT00018843	MMT00080684	0.0395772	undirected	1600029D21Rik	BC013712
MMT00018843	MMT00067079	0.145731	undirected	1600029D21Rik	Fetub
MMT00018843	MMT00001806	0.0365222	undirected	1600029D21Rik	Cd84
MMT00018843	MMT00022586	0.10052	undirected	1600029D21Rik	Apod
MMT00018843	MMT00026944	0.100453	undirected	1600029D21Rik	Igfbp2
MMT00018843	MMT00036455	0.0827394	undirected	1600029D21Rik	G6pc2
MMT00018843	MMT00016669	0.0414938	undirected	1600029D21Rik	Gp49a
MMT00018843	MMT00002249	0.0280922	undirected	1600029D21Rik	Ank1
MMT00018843	MMT00059847	0.215742	undirected	1600029D21Rik	Ngb
MMT00018843	MMT00015950	0.0210653	undirected	1600029D21Rik	Cnksr2
MMT00018843	MMT00019014	0.0548931	undirected	1600029D21Rik	Yars
MMT00018843	MMT00035020	0.22164	undirected	1600029D21Rik	Prkar1b
MMT00018843	MMT00049504	0.101599	undirected	1600029D21Rik	Slc6a4
MMT00018843	MMT00074183	0.135011	undirected	1600029D21Rik	Wrb
MMT00018843	MMT00073625	0.235872	undirected	1600029D21Rik	A230065H16Rik
MMT00018843	MMT00045159	0.0703076	undirected	1600029D21Rik	Cbs
MMT00018843	MMT00068444	0.074526	undirected	1600029D21Rik	Prnd
MMT00018843	MMT00004176	0.060873	undirected	1600029D21Rik	Cybb
MMT00018843	MMT00044885	0.0514148	undirected	1600029D21Rik	Capn9
MMT00018843	MMT00028197	0.138862	undirected	1600029D21Rik	4930438A08Rik
MMT00018843	MMT00006698	0.0416835	undirected	1600029D21Rik	Olfr667
MMT00018843	MMT00029202	0.153417	undirected	1600029D21Rik	Rgs7
MMT00018843	MMT00071233	0.0340431	undirected	1600029D21Rik	Pou2af1
MMT00018843	MMT00017138	0.113534	undirected	1600029D21Rik	Myo3a
MMT00018843	MMT00009424	0.0777356	undirected	1600029D21Rik	Traf2
MMT00018843	MMT00010285	0.0605807	undirected	1600029D21Rik	Pzp
MMT00018843	MMT00021948	0.118913	undirected	1600029D21Rik	Sf3a2
MMT00018843	MMT00078069	0.0727241	undirected	1600029D21Rik	1810010H24Rik
MMT00018843	MMT00038396	0.0623899	undirected	1600029D21Rik	Bglap2
MMT00018843	MMT00006323	0.162456	undirected	1600029D21Rik	Ache
MMT00018843	MMT00033506	0.131661	undirected	1600029D21Rik	4632427E13Rik
MMT00018843	MMT00022784	0.0219121	undirected	1600029D21Rik	Usp18
MMT00018843	MMT00003475	0.0652299	undirected	1600029D21Rik	Alg12
MMT00018843	MMT00026973	0.13096	undirected	1600029D21Rik	Mx1
MMT00018843	MMT00020871	0.137169	undirected	1600029D21Rik	Fcer1a
MMT00018843	MMT00081348	0.0920461	undirected	1600029D21Rik	Myo1f
MMT00018843	MMT00081727	0.0501194	undirected	1600029D21Rik	Tbc1d12
MMT00018843	MMT00018994	0.0261421	undirected	1600029D21Rik	Akp3
MMT00018843	MMT00043936	0.0231685	undirected	1600029D21Rik	Cd48
MMT00018843	MMT00018014	0.172561	undirected	1600029D21Rik	Pard6g
MMT00018843	MMT00058269	0.0226627	undirected	1600029D21Rik	Tas2r105
MMT00018843	MMT00031488	0.0687661	undirected	1600029D21Rik	Sorl1
MMT00018843	MMT00046154	0.137906	undirected	1600029D21Rik	9330182L06Rik
MMT00018843	MMT00032750	0.0763608	undirected	1600029D21Rik	Atp1b4
MMT00018843	MMT00031340	0.209871	undirected	1600029D21Rik	Nfasc
MMT00018843	MMT00069732	0.106891	undirected	1600029D21Rik	Calb1
MMT00018843	MMT00049304	0.0603548	undirected	1600029D21Rik	Cyp3a13
MMT00018843	MMT00037740	0.0375509	undirected	1600029D21Rik	Ptpro
MMT00018843	MMT00078782	0.0528003	undirected	1600029D21Rik	Mpp2
MMT00018843	MMT00048579	0.0772913	undirected	1600029D21Rik	Nrap
MMT00018843	MMT00026943	0.0659255	undirected	1600029D21Rik	Rorb
MMT00018843	MMT00014106	0.0225802	undirected	1600029D21Rik	4933400C23
MMT00018843	MMT00036143	0.0654996	undirected	1600029D21Rik	Glipr2
MMT00018843	MMT00000760	0.112608	undirected	1600029D21Rik	Tcrb-J
MMT00018843	MMT00071842	0.171375	undirected	1600029D21Rik	Prrx2
MMT00018843	MMT00038361	0.133337	undirected	1600029D21Rik	Tgfbr3
MMT00018843	MMT00035279	0.233133	undirected	1600029D21Rik	Fez1
MMT00018843	MMT00053906	0.133713	undirected	1600029D21Rik	Hao1
MMT00018843	MMT00061212	0.126001	undirected	1600029D21Rik	Ccnd1
MMT00018843	MMT00082175	0.117309	undirected	1600029D21Rik	Cdh3
MMT00018843	MMT00070310	0.257373	undirected	1600029D21Rik	Kctd12
MMT00018843	MMT00046734	0.135083	undirected	1600029D21Rik	Sardh
MMT00018843	MMT00038451	0.0619934	undirected	1600029D21Rik	4930417G10Rik
MMT00018843	MMT00020883	0.0391043	undirected	1600029D21Rik	Kit
MMT00059280	MMT00063533	0.0413259	undirected	Coch	Ms4a4b
MMT00059280	MMT00079177	0.103729	undirected	Coch	Card14
MMT00059280	MMT00048973	0.178035	undirected	Coch	Mcpt4
MMT00059280	MMT00018127	0.032129	undirected	Coch	Ntn1
MMT00059280	MMT00012338	0.0523476	undirected	Coch	Ptgfrn
MMT00059280	MMT00009429	0.109617	undirected	Coch	Serpinb13
MMT00059280	MMT00012971	0.0218405	undirected	Coch	Mgst2
MMT00059280	MMT00015542	0.0958545	undirected	Coch	Pkp1
MMT00059280	MMT00027774	0.0294617	undirected	Coch	Kcne1l
MMT00059280	MMT00067891	0.0294523	undirected	Coch	Folr2
MMT00059280	MMT00082385	0.0407182	undirected	Coch	Nme4
MMT00059280	MMT00031654	0.147396	undirected	Coch	Hs6st1
MMT00059280	MMT00081212	0.0265661	undirected	Coch	Slfn4
MMT00059280	MMT00030541	0.137614	undirected	Coch	Gdf10
MMT00059280	MMT00011648	0.0411232	undirected	Coch	Rem2
MMT00059280	MMT00012342	0.184561	undirected	Coch	Adcy1
MMT00059280	MMT00080603	0.146623	undirected	Coch	Anxa8
MMT00059280	MMT00068279	0.19719	undirected	Coch	Fmod
MMT00059280	MMT00031546	0.112695	undirected	Coch	Cpa3
MMT00059280	MMT00059295	0.0617685	undirected	Coch	Cab39
MMT00059280	MMT00079541	0.0559998	undirected	Coch	Pi15
MMT00059280	MMT00019015	0.045432	undirected	Coch	Dpys
MMT00059280	MMT00034019	0.0324889	undirected	Coch	Ptgs2
MMT00059280	MMT00055921	0.0724013	undirected	Coch	Retnla
MMT00059280	MMT00063663	0.0460324	undirected	Coch	Rgs1
MMT00059280	MMT00025515	0.0326888	undirected	Coch	Crym
MMT00059280	MMT00044207	0.0253111	undirected	Coch	Kctd16
MMT00059280	MMT00037697	0.037695	undirected	Coch	Acr
MMT00059280	MMT00039835	0.025478	undirected	Coch	Olfr575
MMT00059280	MMT00079011	0.11104	undirected	Coch	Gmip
MMT00059280	MMT00017876	0.0650714	undirected	Coch	H2-DMb1
MMT00059280	MMT00011746	0.0741144	undirected	Coch	Plcb1
MMT00059280	MMT00000570	0.0353805	undirected	Coch	Ier3
MMT00059280	MMT00028633	0.118985	undirected	Coch	Frzb
MMT00059280	MMT00028910	0.0340299	undirected	Coch	Cdh16
MMT00059280	MMT00015355	0.0209081	undirected	Coch	Arg1
MMT00059280	MMT00017475	0.0352218	undirected	Coch	Atp8a2
MMT00059280	MMT00029403	0.041357	undirected	Coch	2010107G23Rik
MMT00059280	MMT00051144	0.0288397	undirected	Coch	Nid2
MMT00059280	MMT00011158	0.0653268	undirected	Coch	Syt10
MMT00059280	MMT00067646	0.0576009	undirected	Coch	Ccl24
MMT00059280	MMT00034980	0.0220891	undirected	Coch	4833427G06Rik
MMT00059280	MMT00005022	0.0431885	undirected	Coch	1700025G04Rik
MMT00059280	MMT00042972	0.0258289	undirected	Coch	Aox1
MMT00059280	MMT00014701	0.0704247	undirected	Coch	Cdon
MMT00059280	MMT00053670	0.0651304	undirected	Coch	Chn1
MMT00059280	MMT00078723	0.0541728	undirected	Coch	Mmp2
MMT00059280	MMT00082376	0.0549853	undirected	Coch	Scn1b
MMT00059280	MMT00012907	0.0216858	undirected	Coch	Rest
MMT00059280	MMT00067789	0.0827629	undirected	Coch	Svs5
MMT00059280	MMT00069681	0.0330637	undirected	Coch	Tnnc2
MMT00059280	MMT00012212	0.109873	undirected	Coch	Slc25a30
MMT00059280	MMT00049221	0.187195	undirected	Coch	Hic1
MMT00059280	MMT00046994	0.113459	undirected	Coch	Fads1
MMT00059280	MMT00080956	0.0240931	undirected	Coch	Doc2g
MMT00059280	MMT00073254	0.0567948	undirected	Coch	Tnfaip2
MMT00059280	MMT00022926	0.174204	undirected	Coch	Myoc
MMT00059280	MMT00047914	0.067805	undirected	Coch	Coq3
MMT00059280	MMT00011298	0.0743163	undirected	Coch	Scx
MMT00059280	MMT00011651	0.128148	undirected	Coch	Acsl6
MMT00059280	MMT00070222	0.131405	undirected	Coch	Rasa4
MMT00059280	MMT00082736	0.0327098	undirected	Coch	4931428L18Rik
MMT00059280	MMT00059245	0.173006	undirected	Coch	Rarres1
MMT00059280	MMT00078249	0.115581	undirected	Coch	Pcdhb6
MMT00059280	MMT00026709	0.0913338	undirected	Coch	Vnn1
MMT00059280	MMT00005510	0.134626	undirected	Coch	Ahsg
MMT00059280	MMT00027892	0.0498731	undirected	Coch	Mmp20
MMT00059280	MMT00014165	0.0517022	undirected	Coch	Klhl6
MMT00059280	MMT00013511	0.0755932	undirected	Coch	Olfr1504
MMT00059280	MMT00047418	0.14282	undirected	Coch	Gpnmb
MMT00059280	MMT00062400	0.0336362	undirected	Coch	Dpp7
MMT00059280	MMT00060589	0.0755953	undirected	Coch	Glra1
MMT00059280	MMT00048836	0.0203899	undirected	Coch	Ear11
MMT00059280	MMT00060071	0.0220401	undirected	Coch	Hpgd
MMT00059280	MMT00015239	0.13752	undirected	Coch	Gdap1
MMT00059280	MMT00078239	0.128061	undirected	Coch	Homer3
MMT00059280	MMT00063470	0.0421941	undirected	Coch	Agxt
MMT00059280	MMT00021096	0.0251704	undirected	Coch	H2-DMa
MMT00059280	MMT00057404	0.0304163	undirected	Coch	Prss12
MMT00059280	MMT00037025	0.0948419	undirected	Coch	Bmper
MMT00059280	MMT00030601	0.0750723	undirected	Coch	Zfp287
MMT00059280	MMT00021946	0.100399	undirected	Coch	Rfx4
MMT00059280	MMT00053102	0.161821	undirected	Coch	Cacna2d3
MMT00059280	MMT00047610	0.0683916	undirected	Coch	Cst9
MMT00059280	MMT00057059	0.101698	undirected	Coch	P2rx7
MMT00059280	MMT00036564	0.0387163	undirected	Coch	Pik3cg
MMT00059280	MMT00071500	0.151204	undirected	Coch	Mx2
MMT00059280	MMT00072394	0.0494639	undirected	Coch	Trpc4
MMT00059280	MMT00010142	0.172555	undirected	Coch	Sfrp2
MMT00059280	MMT00076717	0.0243211	undirected	Coch	Diap3
MMT00059280	MMT00008784	0.0655456	undirected	Coch	Hspa8
MMT00059280	MMT00054409	0.105003	undirected	Coch	Dbnl
MMT00059280	MMT00031333	0.0818748	undirected	Coch	Pcdhb13
MMT00059280	MMT00079156	0.0678069	undirected	Coch	Ms4a4d
MMT00059280	MMT00044361	0.0685741	undirected	Coch	Plekhb2
MMT00059280	MMT00015096	0.0284062	undirected	Coch	Slc6a15
MMT00059280	MMT00060215	0.022805	undirected	Coch	Pln
MMT00059280	MMT00024264	0.0390766	undirected	Coch	Alms1
MMT00059280	MMT00029598	0.0545673	undirected	Coch	Uchl1
MMT00059280	MMT00033072	0.0296279	undirected	Coch	Rnf103
MMT00059280	MMT00065768	0.171034	undirected	Coch	Igfbp4
MMT00059280	MMT00051022	0.0752155	undirected	Coch	Fgd2
MMT00059280	MMT00076599	0.0401159	undirected	Coch	Ece2
MMT00059280	MMT00069165	0.128314	undirected	Coch	Fbln5
MMT00059280	MMT00060813	0.0381461	undirected	Coch	Sdc3
MMT00059280	MMT00081993	0.0395146	undirected	Coch	Col8a1
MMT00059280	MMT00026998	0.0218102	undirected	Coch	2210020M01Rik
MMT00059280	MMT00030373	0.0367194	undirected	Coch	Crlf1
MMT00059280	MMT00065883	0.0361142	undirected	Coch	Foxn2
MMT00059280	MMT00067082	0.0207816	undirected	Coch	Chrna4
MMT00059280	MMT00036723	0.0410273	undirected	Coch	Slc9a9
MMT00059280	MMT00060597	0.0854523	undirected	Coch	Bpgm
MMT00059280	MMT00000131	0.0791352	undirected	Coch	Cntn6
MMT00059280	MMT00020772	0.114177	undirected	Coch	Ctdsp2
MMT00059280	MMT00050965	0.0674326	undirected	Coch	Slc15a3
MMT00059280	MMT00048155	0.0241437	undirected	Coch	Slpi
MMT00059280	MMT00053034	0.158357	undirected	Coch	Kif1a
MMT00059280	MMT00036955	0.122192	undirected	Coch	Jrk
MMT00059280	MMT00005957	0.144861	undirected	Coch	Cpxm2
MMT00059280	MMT00025067	0.0333481	undirected	Coch	Rgs18
MMT00059280	MMT00056571	0.173755	undirected	Coch	BC026585
MMT00059280	MMT00038375	0.0399541	undirected	Coch	AW146020
MMT00059280	MMT00068584	0.0654469	undirected	Coch	Bid
MMT00059280	MMT00016365	0.0275803	undirected	Coch	Sncaip
MMT00059280	MMT00054808	0.0870678	undirected	Coch	Csf1r
MMT00059280	MMT00006988	0.0563265	undirected	Coch	Olig1
MMT00059280	MMT00065750	0.0383305	undirected	Coch	Pdxp
MMT00059280	MMT00029323	0.0593403	undirected	Coch	Htr1a
MMT00059280	MMT00047171	0.0827269	undirected	Coch	Icam1
MMT00059280	MMT00037375	0.251105	undirected	Coch	Skiv2l
MMT00059280	MMT00011577	0.133795	undirected	Coch	Il28ra
MMT00059280	MMT00016680	0.1328	undirected	Coch	Aamp
MMT00059280	MMT00040374	0.0385393	undirected	Coch	Trim9
MMT00059280	MMT00039970	0.171022	undirected	Coch	Pak1
MMT00059280	MMT00031882	0.0393587	undirected	Coch	4933402N03Rik
MMT00059280	MMT00080573	0.102098	undirected	Coch	Rtn4rl1
MMT00059280	MMT00005428	0.0308529	undirected	Coch	D430019H16Rik
MMT00059280	MMT00018141	0.0229292	undirected	Coch	Pik3cd
MMT00059280	MMT00061075	0.0808303	undirected	Coch	Arid3a
MMT00059280	MMT00000368	0.0565145	undirected	Coch	Spry1
MMT00059280	MMT00080083	0.0638334	undirected	Coch	Wt1
MMT00059280	MMT00064107	0.125522	undirected	Coch	Mlana
MMT00059280	MMT00010362	0.0418543	undirected	Coch	Grb10
MMT00059280	MMT00045272	0.131388	undirected	Coch	Etv4
MMT00059280	MMT00036749	0.0263051	undirected	Coch	1190002N15Rik
MMT00059280	MMT00079222	0.0295584	undirected	Coch	Cntn1
MMT00059280	MMT00077375	0.0434618	undirected	Coch	Cd68
MMT00059280	MMT00080633	0.0481949	undirected	Coch	Cxcr6
MMT00059280	MMT00037447	0.0356212	undirected	Coch	Trem2
MMT00059280	MMT00029329	0.0315797	undirected	Coch	Ppfia4
MMT00059280	MMT00019490	0.050803	undirected	Coch	Folh1
MMT00059280	MMT00073624	0.114211	undirected	Coch	Hcrtr1
MMT00059280	MMT00015288	0.0298493	undirected	Coch	1700015G11Rik
MMT00059280	MMT00079572	0.0589616	undirected	Coch	9430091E24Rik
MMT00059280	MMT00013893	0.0459345	undirected	Coch	Cyp2s1
MMT00059280	MMT00072852	0.053734	undirected	Coch	Bai2
MMT00059280	MMT00064623	0.0566828	undirected	Coch	Abcc6
MMT00059280	MMT00077956	0.0333815	undirected	Coch	Ltbp2
MMT00059280	MMT00000777	0.160176	undirected	Coch	F3
MMT00059280	MMT00031183	0.212563	undirected	Coch	Mdk
MMT00059280	MMT00019358	0.0461197	undirected	Coch	Tnr
MMT00059280	MMT00008854	0.0452211	undirected	Coch	H2-Q7
MMT00059280	MMT00006677	0.0833768	undirected	Coch	Clic3
MMT00059280	MMT00001955	0.0399713	undirected	Coch	Olfr1265
MMT00059280	MMT00009954	0.0431002	undirected	Coch	Olfr470
MMT00059280	MMT00060429	0.139229	undirected	Coch	Olfr1052
MMT00059280	MMT00025169	0.0799632	undirected	Coch	Insrr
MMT00059280	MMT00048637	0.113525	undirected	Coch	Crybb3
MMT00059280	MMT00070418	0.130032	undirected	Coch	Adra2c
MMT00059280	MMT00005482	0.13208	undirected	Coch	Ibsp
MMT00059280	MMT00054422	0.037809	undirected	Coch	Mrc1
MMT00059280	MMT00078815	0.056099	undirected	Coch	Ptprf
MMT00059280	MMT00008186	0.0201682	undirected	Coch	Ubtf
MMT00059280	MMT00047462	0.034921	undirected	Coch	Ttc12
MMT00059280	MMT00027378	0.0956052	undirected	Coch	Itih3
MMT00059280	MMT00024553	0.101179	undirected	Coch	Cps1
MMT00059280	MMT00001160	0.0291267	undirected	Coch	1500009C09Rik
MMT00059280	MMT00046600	0.0606513	undirected	Coch	Scn3b
MMT00059280	MMT00022777	0.109885	undirected	Coch	C530028O21Rik
MMT00059280	MMT00012502	0.16765	undirected	Coch	Ass1
MMT00059280	MMT00031281	0.0362874	undirected	Coch	Il3ra
MMT00059280	MMT00004123	0.105236	undirected	Coch	Cdkn2a
MMT00059280	MMT00068712	0.0660962	undirected	Coch	Fcgr1
MMT00059280	MMT00010412	0.0278802	undirected	Coch	Serpina1d
MMT00059280	MMT00056703	0.0363827	undirected	Coch	Serpinb6b
MMT00059280	MMT00007847	0.0200824	undirected	Coch	Gal3st1
MMT00059280	MMT00006013	0.0891496	undirected	Coch	Gjb3
MMT00059280	MMT00029984	0.0223368	undirected	Coch	Sema5a
MMT00059280	MMT00006432	0.0900301	undirected	Coch	Il17re
MMT00059280	MMT00021150	0.13967	undirected	Coch	Prosapip1
MMT00059280	MMT00072686	0.12544	undirected	Coch	Enpp5
MMT00059280	MMT00044934	0.0290644	undirected	Coch	Olfr729
MMT00059280	MMT00030138	0.0760068	undirected	Coch	Clcn1
MMT00059280	MMT00008072	0.108946	undirected	Coch	Cabp5
MMT00059280	MMT00045480	0.0319639	undirected	Coch	Gyk
MMT00059280	MMT00069832	0.0316735	undirected	Coch	Mbd2
MMT00059280	MMT00015631	0.0221912	undirected	Coch	Atp1a3
MMT00059280	MMT00022494	0.142985	undirected	Coch	Slc22a18
MMT00059280	MMT00037781	0.0512967	undirected	Coch	Gas7
MMT00059280	MMT00028683	0.0430061	undirected	Coch	Msx2
MMT00059280	MMT00048340	0.12653	undirected	Coch	Efemp1
MMT00059280	MMT00080684	0.0212159	undirected	Coch	BC013712
MMT00059280	MMT00067079	0.0795134	undirected	Coch	Fetub
MMT00059280	MMT00022586	0.0460636	undirected	Coch	Apod
MMT00059280	MMT00026944	0.0557711	undirected	Coch	Igfbp2
MMT00059280	MMT00036455	0.0565262	undirected	Coch	G6pc2
MMT00059280	MMT00059847	0.16587	undirected	Coch	Ngb
MMT00059280	MMT00019014	0.0227029	undirected	Coch	Yars
MMT00059280	MMT00035020	0.152358	undirected	Coch	Prkar1b
MMT00059280	MMT00049504	0.130542	undirected	Coch	Slc6a4
MMT00059280	MMT00074183	0.0853012	undirected	Coch	Wrb
MMT00059280	MMT00073625	0.168708	undirected	Coch	A230065H16Rik
MMT00059280	MMT00068444	0.0529134	undirected	Coch	Prnd
MMT00059280	MMT00004176	0.0293818	undirected	Coch	Cybb
MMT00059280	MMT00044885	0.0282231	undirected	Coch	Capn9
MMT00059280	MMT00028197	0.0351038	undirected	Coch	4930438A08Rik
MMT00059280	MMT00029202	0.060887	undirected	Coch	Rgs7
MMT00059280	MMT00017138	0.0798926	undirected	Coch	Myo3a
MMT00059280	MMT00009424	0.0347777	undirected	Coch	Traf2
MMT00059280	MMT00010285	0.0561252	undirected	Coch	Pzp
MMT00059280	MMT00021948	0.087313	undirected	Coch	Sf3a2
MMT00059280	MMT00078069	0.0236014	undirected	Coch	1810010H24Rik
MMT00059280	MMT00038396	0.0221837	undirected	Coch	Bglap2
MMT00059280	MMT00006323	0.0552625	undirected	Coch	Ache
MMT00059280	MMT00033506	0.0803159	undirected	Coch	4632427E13Rik
MMT00059280	MMT00003475	0.0450519	undirected	Coch	Alg12
MMT00059280	MMT00026973	0.139243	undirected	Coch	Mx1
MMT00059280	MMT00020871	0.153292	undirected	Coch	Fcer1a
MMT00059280	MMT00081348	0.0489191	undirected	Coch	Myo1f
MMT00059280	MMT00081727	0.022497	undirected	Coch	Tbc1d12
MMT00059280	MMT00018014	0.15618	undirected	Coch	Pard6g
MMT00059280	MMT00031488	0.0527766	undirected	Coch	Sorl1
MMT00059280	MMT00046154	0.0728662	undirected	Coch	9330182L06Rik
MMT00059280	MMT00032750	0.0485811	undirected	Coch	Atp1b4
MMT00059280	MMT00031340	0.134413	undirected	Coch	Nfasc
MMT00059280	MMT00069732	0.0533574	undirected	Coch	Calb1
MMT00059280	MMT00049304	0.0373164	undirected	Coch	Cyp3a13
MMT00059280	MMT00037740	0.0209146	undirected	Coch	Ptpro
MMT00059280	MMT00078782	0.0301694	undirected	Coch	Mpp2
MMT00059280	MMT00048579	0.046747	undirected	Coch	Nrap
MMT00059280	MMT00026943	0.0489414	undirected	Coch	Rorb
MMT00059280	MMT00036143	0.0415456	undirected	Coch	Glipr2
MMT00059280	MMT00000760	0.151468	undirected	Coch	Tcrb-J
MMT00059280	MMT00071842	0.0961729	undirected	Coch	Prrx2
MMT00059280	MMT00038361	0.058925	undirected	Coch	Tgfbr3
MMT00059280	MMT00035279	0.172878	undirected	Coch	Fez1
MMT00059280	MMT00053906	0.0364869	undirected	Coch	Hao1
MMT00059280	MMT00061212	0.0807319	undirected	Coch	Ccnd1
MMT00059280	MMT00082175	0.0436786	undirected	Coch	Cdh3
MMT00059280	MMT00070310	0.196743	undirected	Coch	Kctd12
MMT00059280	MMT00046734	0.120948	undirected	Coch	Sardh
MMT00059280	MMT00020883	0.0232744	undirected	Coch	Kit
MMT00063533	MMT00010083	0.0439097	undirected	Ms4a4b	Cyp4f15
MMT00063533	MMT00033205	0.107106	undirected	Ms4a4b	Cst7
MMT00063533	MMT00012362	0.0614193	undirected	Ms4a4b	Fcna
MMT00063533	MMT00079177	0.0672967	undirected	Ms4a4b	Card14
MMT00063533	MMT00000858	0.0324125	undirected	Ms4a4b	Lyl1
MMT00063533	MMT00048973	0.0578004	undirected	Ms4a4b	Mcpt4
MMT00063533	MMT00018127	0.106954	undirected	Ms4a4b	Ntn1
MMT00063533	MMT00012338	0.153856	undirected	Ms4a4b	Ptgfrn
MMT00063533	MMT00009429	0.149382	undirected	Ms4a4b	Serpinb13
MMT00063533	MMT00012971	0.178855	undirected	Ms4a4b	Mgst2
MMT00063533	MMT00015542	0.0232567	undirected	Ms4a4b	Pkp1
MMT00063533	MMT00027774	0.0454799	undirected	Ms4a4b	Kcne1l
MMT00063533	MMT00067891	0.0863654	undirected	Ms4a4b	Folr2
MMT00063533	MMT00082385	0.188823	undirected	Ms4a4b	Nme4
MMT00063533	MMT00031654	0.0748653	undirected	Ms4a4b	Hs6st1
MMT00063533	MMT00030404	0.144019	undirected	Ms4a4b	C1qa
MMT00063533	MMT00081212	0.110023	undirected	Ms4a4b	Slfn4
MMT00063533	MMT00030541	0.0885838	undirected	Ms4a4b	Gdf10
MMT00063533	MMT00011648	0.047056	undirected	Ms4a4b	Rem2
MMT00063533	MMT00018095	0.0806784	undirected	Ms4a4b	Gk2
MMT00063533	MMT00012342	0.043898	undirected	Ms4a4b	Adcy1
MMT00063533	MMT00082420	0.133349	undirected	Ms4a4b	Cd83
MMT00063533	MMT00080603	0.0328015	undirected	Ms4a4b	Anxa8
MMT00063533	MMT00068279	0.0791376	undirected	Ms4a4b	Fmod
MMT00063533	MMT00059097	0.135863	undirected	Ms4a4b	Sc4mol
MMT00063533	MMT00072505	0.0545071	undirected	Ms4a4b	Abp1
MMT00063533	MMT00031546	0.0597252	undirected	Ms4a4b	Cpa3
MMT00063533	MMT00059295	0.0956912	undirected	Ms4a4b	Cab39
MMT00063533	MMT00045956	0.147745	undirected	Ms4a4b	Il10ra
MMT00063533	MMT00030162	0.0513185	undirected	Ms4a4b	Trpv5
MMT00063533	MMT00079309	0.0993578	undirected	Ms4a4b	Exo1
MMT00063533	MMT00079541	0.107301	undirected	Ms4a4b	Pi15
MMT00063533	MMT00025100	0.0767744	undirected	Ms4a4b	Sppl3
MMT00063533	MMT00044688	0.0942809	undirected	Ms4a4b	Akr1c12
MMT00063533	MMT00019015	0.0732836	undirected	Ms4a4b	Dpys
MMT00063533	MMT00034019	0.0232166	undirected	Ms4a4b	Ptgs2
MMT00063533	MMT00055921	0.0659476	undirected	Ms4a4b	Retnla
MMT00063533	MMT00063663	0.0712845	undirected	Ms4a4b	Rgs1
MMT00063533	MMT00056355	0.0274619	undirected	Ms4a4b	Mill1
MMT00063533	MMT00023471	0.117284	undirected	Ms4a4b	Tyrobp
MMT00063533	MMT00073282	0.0869778	undirected	Ms4a4b	Itgb2
MMT00063533	MMT00044207	0.118336	undirected	Ms4a4b	Kctd16
MMT00063533	MMT00080429	0.0673864	undirected	Ms4a4b	Slc15a2
MMT00063533	MMT00037697	0.0561142	undirected	Ms4a4b	Acr
MMT00063533	MMT00039835	0.0218804	undirected	Ms4a4b	Olfr575
MMT00063533	MMT00079011	0.112509	undirected	Ms4a4b	Gmip
MMT00063533	MMT00017876	0.205182	undirected	Ms4a4b	H2-DMb1
MMT00063533	MMT00011746	0.106312	undirected	Ms4a4b	Plcb1
MMT00063533	MMT00000570	0.0246077	undirected	Ms4a4b	Ier3
MMT00063533	MMT00028633	0.116721	undirected	Ms4a4b	Frzb
MMT00063533	MMT00028910	0.0867512	undirected	Ms4a4b	Cdh16
MMT00063533	MMT00055270	0.108268	undirected	Ms4a4b	Ifitm6
MMT00063533	MMT00060105	0.0396579	undirected	Ms4a4b	4933405O20Rik
MMT00063533	MMT00029403	0.168786	undirected	Ms4a4b	2010107G23Rik
MMT00063533	MMT00018370	0.119509	undirected	Ms4a4b	Csf3
MMT00063533	MMT00011158	0.0348276	undirected	Ms4a4b	Syt10
MMT00063533	MMT00067646	0.0398683	undirected	Ms4a4b	Ccl24
MMT00063533	MMT00058927	0.0272261	undirected	Ms4a4b	3110009E18Rik
MMT00063533	MMT00058358	0.0546949	undirected	Ms4a4b	1700093K21Rik
MMT00063533	MMT00034980	0.0730219	undirected	Ms4a4b	4833427G06Rik
MMT00063533	MMT00005022	0.0658246	undirected	Ms4a4b	1700025G04Rik
MMT00063533	MMT00042972	0.189319	undirected	Ms4a4b	Aox1
MMT00063533	MMT00014701	0.0823219	undirected	Ms4a4b	Cdon
MMT00063533	MMT00053670	0.175313	undirected	Ms4a4b	Chn1
MMT00063533	MMT00078723	0.0721434	undirected	Ms4a4b	Mmp2
MMT00063533	MMT00049421	0.127148	undirected	Ms4a4b	Cd79b
MMT00063533	MMT00082376	0.0481133	undirected	Ms4a4b	Scn1b
MMT00063533	MMT00012907	0.110562	undirected	Ms4a4b	Rest
MMT00063533	MMT00067789	0.047965	undirected	Ms4a4b	Svs5
MMT00063533	MMT00069681	0.0940025	undirected	Ms4a4b	Tnnc2
MMT00063533	MMT00012212	0.056923	undirected	Ms4a4b	Slc25a30
MMT00063533	MMT00049221	0.074399	undirected	Ms4a4b	Hic1
MMT00063533	MMT00046994	0.0205721	undirected	Ms4a4b	Fads1
MMT00063533	MMT00080956	0.0821787	undirected	Ms4a4b	Doc2g
MMT00063533	MMT00054089	0.168928	undirected	Ms4a4b	Itgb7
MMT00063533	MMT00073254	0.0341347	undirected	Ms4a4b	Tnfaip2
MMT00063533	MMT00014082	0.0434835	undirected	Ms4a4b	Slc6a18
MMT00063533	MMT00022926	0.0847312	undirected	Ms4a4b	Myoc
MMT00063533	MMT00047914	0.0382771	undirected	Ms4a4b	Coq3
MMT00063533	MMT00011298	0.0250241	undirected	Ms4a4b	Scx
MMT00063533	MMT00011651	0.0316507	undirected	Ms4a4b	Acsl6
MMT00063533	MMT00070222	0.0653821	undirected	Ms4a4b	Rasa4
MMT00063533	MMT00082736	0.0621488	undirected	Ms4a4b	4931428L18Rik
MMT00063533	MMT00059245	0.057855	undirected	Ms4a4b	Rarres1
MMT00063533	MMT00002362	0.0634455	undirected	Ms4a4b	Fmnl1
MMT00063533	MMT00067186	0.0552194	undirected	Ms4a4b	Irf7
MMT00063533	MMT00026709	0.11786	undirected	Ms4a4b	Vnn1
MMT00063533	MMT00005510	0.0732699	undirected	Ms4a4b	Ahsg
MMT00063533	MMT00027892	0.0366395	undirected	Ms4a4b	Mmp20
MMT00063533	MMT00049862	0.0516991	undirected	Ms4a4b	Pgc
MMT00063533	MMT00070618	0.0974374	undirected	Ms4a4b	Npl
MMT00063533	MMT00014165	0.164727	undirected	Ms4a4b	Klhl6
MMT00063533	MMT00013511	0.0789606	undirected	Ms4a4b	Olfr1504
MMT00063533	MMT00047418	0.063403	undirected	Ms4a4b	Gpnmb
MMT00063533	MMT00062400	0.0400587	undirected	Ms4a4b	Dpp7
MMT00063533	MMT00060589	0.039526	undirected	Ms4a4b	Glra1
MMT00063533	MMT00034690	0.135756	undirected	Ms4a4b	Dok2
MMT00063533	MMT00048836	0.105264	undirected	Ms4a4b	Ear11
MMT00063533	MMT00060071	0.0687747	undirected	Ms4a4b	Hpgd
MMT00063533	MMT00015239	0.103752	undirected	Ms4a4b	Gdap1
MMT00063533	MMT00033228	0.116282	undirected	Ms4a4b	Ly86
MMT00063533	MMT00078239	0.0477732	undirected	Ms4a4b	Homer3
MMT00063533	MMT00009738	0.0534492	undirected	Ms4a4b	Ropn1
MMT00063533	MMT00027755	0.110286	undirected	Ms4a4b	Mak
MMT00063533	MMT00055430	0.0894495	undirected	Ms4a4b	S100a3
MMT00063533	MMT00063470	0.0927251	undirected	Ms4a4b	Agxt
MMT00063533	MMT00021096	0.191834	undirected	Ms4a4b	H2-DMa
MMT00063533	MMT00057404	0.0765432	undirected	Ms4a4b	Prss12
MMT00063533	MMT00037025	0.108905	undirected	Ms4a4b	Bmper
MMT00063533	MMT00030601	0.109874	undirected	Ms4a4b	Zfp287
MMT00063533	MMT00021946	0.102672	undirected	Ms4a4b	Rfx4
MMT00063533	MMT00053102	0.0454198	undirected	Ms4a4b	Cacna2d3
MMT00063533	MMT00047610	0.0473666	undirected	Ms4a4b	Cst9
MMT00063533	MMT00057059	0.0717109	undirected	Ms4a4b	P2rx7
MMT00063533	MMT00036564	0.07685	undirected	Ms4a4b	Pik3cg
MMT00063533	MMT00071500	0.0507162	undirected	Ms4a4b	Mx2
MMT00063533	MMT00010142	0.070565	undirected	Ms4a4b	Sfrp2
MMT00063533	MMT00076717	0.168082	undirected	Ms4a4b	Diap3
MMT00063533	MMT00036250	0.0497527	undirected	Ms4a4b	Ankrd1
MMT00063533	MMT00008784	0.0281448	undirected	Ms4a4b	Hspa8
MMT00063533	MMT00080352	0.029206	undirected	Ms4a4b	Fdft1
MMT00063533	MMT00075488	0.109224	undirected	Ms4a4b	Slc35d1
MMT00063533	MMT00022062	0.0574332	undirected	Ms4a4b	Col13a1
MMT00063533	MMT00037307	0.0258278	undirected	Ms4a4b	Cpa4
MMT00063533	MMT00054240	0.0303238	undirected	Ms4a4b	Sox11
MMT00063533	MMT00054409	0.0231751	undirected	Ms4a4b	Dbnl
MMT00063533	MMT00043465	0.120774	undirected	Ms4a4b	1700011F03Rik
MMT00063533	MMT00069620	0.140822	undirected	Ms4a4b	Nova1
MMT00063533	MMT00031333	0.0795428	undirected	Ms4a4b	Pcdhb13
MMT00063533	MMT00079156	0.0722194	undirected	Ms4a4b	Ms4a4d
MMT00063533	MMT00044361	0.0208946	undirected	Ms4a4b	Plekhb2
MMT00063533	MMT00060215	0.041323	undirected	Ms4a4b	Pln
MMT00063533	MMT00024264	0.134621	undirected	Ms4a4b	Alms1
MMT00063533	MMT00019749	0.10621	undirected	Ms4a4b	Dach2
MMT00063533	MMT00033072	0.0731375	undirected	Ms4a4b	Rnf103
MMT00063533	MMT00065768	0.060591	undirected	Ms4a4b	Igfbp4
MMT00063533	MMT00051022	0.205968	undirected	Ms4a4b	Fgd2
MMT00063533	MMT00076599	0.0961518	undirected	Ms4a4b	Ece2
MMT00063533	MMT00069165	0.0572152	undirected	Ms4a4b	Fbln5
MMT00063533	MMT00060813	0.11197	undirected	Ms4a4b	Sdc3
MMT00063533	MMT00077777	0.124381	undirected	Ms4a4b	4932414N04Rik
MMT00063533	MMT00081993	0.0831439	undirected	Ms4a4b	Col8a1
MMT00063533	MMT00026998	0.145621	undirected	Ms4a4b	2210020M01Rik
MMT00063533	MMT00030373	0.0556991	undirected	Ms4a4b	Crlf1
MMT00063533	MMT00067082	0.0869013	undirected	Ms4a4b	Chrna4
MMT00063533	MMT00013974	0.0580839	undirected	Ms4a4b	Drd1a
MMT00063533	MMT00036723	0.0604804	undirected	Ms4a4b	Slc9a9
MMT00063533	MMT00060597	0.11652	undirected	Ms4a4b	Bpgm
MMT00063533	MMT00000131	0.0262208	undirected	Ms4a4b	Cntn6
MMT00063533	MMT00020772	0.0811314	undirected	Ms4a4b	Ctdsp2
MMT00063533	MMT00050965	0.0783975	undirected	Ms4a4b	Slc15a3
MMT00063533	MMT00048155	0.0252029	undirected	Ms4a4b	Slpi
MMT00063533	MMT00053034	0.0474499	undirected	Ms4a4b	Kif1a
MMT00063533	MMT00036955	0.0747089	undirected	Ms4a4b	Jrk
MMT00063533	MMT00016676	0.0920189	undirected	Ms4a4b	Kcnk5
MMT00063533	MMT00005957	0.0599849	undirected	Ms4a4b	Cpxm2
MMT00063533	MMT00025067	0.0733391	undirected	Ms4a4b	Rgs18
MMT00063533	MMT00056571	0.115348	undirected	Ms4a4b	BC026585
MMT00063533	MMT00038375	0.091708	undirected	Ms4a4b	AW146020
MMT00063533	MMT00012541	0.129847	undirected	Ms4a4b	Lcp1
MMT00063533	MMT00068584	0.0891067	undirected	Ms4a4b	Bid
MMT00063533	MMT00068509	0.101505	undirected	Ms4a4b	Oit3
MMT00063533	MMT00005653	0.0869934	undirected	Ms4a4b	Ccr5
MMT00063533	MMT00072526	0.0510018	undirected	Ms4a4b	Foxo6
MMT00063533	MMT00016365	0.0864514	undirected	Ms4a4b	Sncaip
MMT00063533	MMT00054808	0.132898	undirected	Ms4a4b	Csf1r
MMT00063533	MMT00006988	0.131097	undirected	Ms4a4b	Olig1
MMT00063533	MMT00040864	0.0724937	undirected	Ms4a4b	Chst2
MMT00063533	MMT00065750	0.143137	undirected	Ms4a4b	Pdxp
MMT00063533	MMT00029323	0.0534695	undirected	Ms4a4b	Htr1a
MMT00063533	MMT00047171	0.0571204	undirected	Ms4a4b	Icam1
MMT00063533	MMT00037375	0.116479	undirected	Ms4a4b	Skiv2l
MMT00063533	MMT00011577	0.100655	undirected	Ms4a4b	Il28ra
MMT00063533	MMT00016680	0.0368349	undirected	Ms4a4b	Aamp
MMT00063533	MMT00040374	0.0352643	undirected	Ms4a4b	Trim9
MMT00063533	MMT00000608	0.206122	undirected	Ms4a4b	Ccl5
MMT00063533	MMT00049364	0.07974	undirected	Ms4a4b	Kbtbd10
MMT00063533	MMT00039970	0.0475676	undirected	Ms4a4b	Pak1
MMT00063533	MMT00029545	0.0383568	undirected	Ms4a4b	Tob2
MMT00063533	MMT00001342	0.108507	undirected	Ms4a4b	Sertad3
MMT00063533	MMT00031882	0.0335628	undirected	Ms4a4b	4933402N03Rik
MMT00063533	MMT00010449	0.0821669	undirected	Ms4a4b	Cacng5
MMT00063533	MMT00005231	0.101852	undirected	Ms4a4b	Tmie
MMT00063533	MMT00080573	0.054136	undirected	Ms4a4b	Rtn4rl1
MMT00063533	MMT00005428	0.045871	undirected	Ms4a4b	D430019H16Rik
MMT00063533	MMT00018141	0.150079	undirected	Ms4a4b	Pik3cd
MMT00063533	MMT00000368	0.0595297	undirected	Ms4a4b	Spry1
MMT00063533	MMT00080083	0.0323921	undirected	Ms4a4b	Wt1
MMT00063533	MMT00064107	0.0507516	undirected	Ms4a4b	Mlana
MMT00063533	MMT00003243	0.0507579	undirected	Ms4a4b	Lrrc4b
MMT00063533	MMT00010362	0.174463	undirected	Ms4a4b	Grb10
MMT00063533	MMT00045272	0.0272158	undirected	Ms4a4b	Etv4
MMT00063533	MMT00036749	0.0562928	undirected	Ms4a4b	1190002N15Rik
MMT00063533	MMT00079222	0.035639	undirected	Ms4a4b	Cntn1
MMT00063533	MMT00077375	0.175248	undirected	Ms4a4b	Cd68
MMT00063533	MMT00080633	0.128488	undirected	Ms4a4b	Cxcr6
MMT00063533	MMT00037447	0.0724069	undirected	Ms4a4b	Trem2
MMT00063533	MMT00029329	0.166773	undirected	Ms4a4b	Ppfia4
MMT00063533	MMT00019490	0.0251591	undirected	Ms4a4b	Folh1
MMT00063533	MMT00073624	0.150966	undirected	Ms4a4b	Hcrtr1
MMT00063533	MMT00015288	0.12035	undirected	Ms4a4b	1700015G11Rik
MMT00063533	MMT00079572	0.105526	undirected	Ms4a4b	9430091E24Rik
MMT00063533	MMT00043771	0.103758	undirected	Ms4a4b	Plek
MMT00063533	MMT00072852	0.0393071	undirected	Ms4a4b	Bai2
MMT00063533	MMT00073226	0.0382309	undirected	Ms4a4b	Mycs
MMT00063533	MMT00064623	0.0638424	undirected	Ms4a4b	Abcc6
MMT00063533	MMT00077956	0.145645	undirected	Ms4a4b	Ltbp2
MMT00063533	MMT00000777	0.0900953	undirected	Ms4a4b	F3
MMT00063533	MMT00031183	0.11559	undirected	Ms4a4b	Mdk
MMT00063533	MMT00017992	0.0862623	undirected	Ms4a4b	Gsg1
MMT00063533	MMT00053446	0.196204	undirected	Ms4a4b	Ptges
MMT00063533	MMT00019358	0.0486482	undirected	Ms4a4b	Tnr
MMT00063533	MMT00008854	0.181253	undirected	Ms4a4b	H2-Q7
MMT00063533	MMT00006677	0.0395865	undirected	Ms4a4b	Clic3
MMT00063533	MMT00017740	0.0819536	undirected	Ms4a4b	Vps52
MMT00063533	MMT00001955	0.03518	undirected	Ms4a4b	Olfr1265
MMT00063533	MMT00009954	0.11992	undirected	Ms4a4b	Olfr470
MMT00063533	MMT00060429	0.0289031	undirected	Ms4a4b	Olfr1052
MMT00063533	MMT00025169	0.0416317	undirected	Ms4a4b	Insrr
MMT00063533	MMT00048637	0.0306668	undirected	Ms4a4b	Crybb3
MMT00063533	MMT00070418	0.0947243	undirected	Ms4a4b	Adra2c
MMT00063533	MMT00041887	0.156989	undirected	Ms4a4b	Hcst
MMT00063533	MMT00005482	0.0434502	undirected	Ms4a4b	Ibsp
MMT00063533	MMT00054422	0.100334	undirected	Ms4a4b	Mrc1
MMT00063533	MMT00020142	0.0942797	undirected	Ms4a4b	Adam34
MMT00063533	MMT00006881	0.0843345	undirected	Ms4a4b	Pprc1
MMT00063533	MMT00078815	0.040379	undirected	Ms4a4b	Ptprf
MMT00063533	MMT00008186	0.0820899	undirected	Ms4a4b	Ubtf
MMT00063533	MMT00047462	0.0215014	undirected	Ms4a4b	Ttc12
MMT00063533	MMT00027378	0.0293804	undirected	Ms4a4b	Itih3
MMT00063533	MMT00016989	0.112989	undirected	Ms4a4b	Ifi47
MMT00063533	MMT00024553	0.0790014	undirected	Ms4a4b	Cps1
MMT00063533	MMT00001160	0.0765796	undirected	Ms4a4b	1500009C09Rik
MMT00063533	MMT00016783	0.0376299	undirected	Ms4a4b	Podn
MMT00063533	MMT00046600	0.0401864	undirected	Ms4a4b	Scn3b
MMT00063533	MMT00022777	0.152007	undirected	Ms4a4b	C530028O21Rik
MMT00063533	MMT00012502	0.0468105	undirected	Ms4a4b	Ass1
MMT00063533	MMT00031281	0.0840122	undirected	Ms4a4b	Il3ra
MMT00063533	MMT00004123	0.117219	undirected	Ms4a4b	Cdkn2a
MMT00063533	MMT00068712	0.156555	undirected	Ms4a4b	Fcgr1
MMT00063533	MMT00010412	0.0456148	undirected	Ms4a4b	Serpina1d
MMT00063533	MMT00056703	0.0412217	undirected	Ms4a4b	Serpinb6b
MMT00063533	MMT00064871	0.112675	undirected	Ms4a4b	Oxtr
MMT00063533	MMT00007847	0.0998281	undirected	Ms4a4b	Gal3st1
MMT00063533	MMT00006013	0.0382228	undirected	Ms4a4b	Gjb3
MMT00063533	MMT00029984	0.116532	undirected	Ms4a4b	Sema5a
MMT00063533	MMT00026736	0.0402465	undirected	Ms4a4b	Olfr24
MMT00063533	MMT00006432	0.0713506	undirected	Ms4a4b	Il17re
MMT00063533	MMT00021150	0.0995934	undirected	Ms4a4b	Prosapip1
MMT00063533	MMT00006067	0.0530385	undirected	Ms4a4b	Adra2a
MMT00063533	MMT00072686	0.109445	undirected	Ms4a4b	Enpp5
MMT00063533	MMT00033710	0.0366803	undirected	Ms4a4b	Muc4
MMT00063533	MMT00044934	0.0286576	undirected	Ms4a4b	Olfr729
MMT00063533	MMT00030138	0.105038	undirected	Ms4a4b	Clcn1
MMT00063533	MMT00008072	0.119571	undirected	Ms4a4b	Cabp5
MMT00063533	MMT00045480	0.0310163	undirected	Ms4a4b	Gyk
MMT00063533	MMT00015631	0.196187	undirected	Ms4a4b	Atp1a3
MMT00063533	MMT00022494	0.0851906	undirected	Ms4a4b	Slc22a18
MMT00063533	MMT00037781	0.137088	undirected	Ms4a4b	Gas7
MMT00063533	MMT00080177	0.113824	undirected	Ms4a4b	Gzmk
MMT00063533	MMT00028683	0.116019	undirected	Ms4a4b	Msx2
MMT00063533	MMT00048340	0.124627	undirected	Ms4a4b	Efemp1
MMT00063533	MMT00080684	0.12447	undirected	Ms4a4b	BC013712
MMT00063533	MMT00067079	0.15057	undirected	Ms4a4b	Fetub
MMT00063533	MMT00001806	0.15047	undirected	Ms4a4b	Cd84
MMT00063533	MMT00022586	0.0749886	undirected	Ms4a4b	Apod
MMT00063533	MMT00026944	0.0367103	undirected	Ms4a4b	Igfbp2
MMT00063533	MMT00036455	0.113872	undirected	Ms4a4b	G6pc2
MMT00063533	MMT00016669	0.124385	undirected	Ms4a4b	Gp49a
MMT00063533	MMT00002249	0.0347478	undirected	Ms4a4b	Ank1
MMT00063533	MMT00059847	0.0556822	undirected	Ms4a4b	Ngb
MMT00063533	MMT00015950	0.0801949	undirected	Ms4a4b	Cnksr2
MMT00063533	MMT00019014	0.0652296	undirected	Ms4a4b	Yars
MMT00063533	MMT00035020	0.112343	undirected	Ms4a4b	Prkar1b
MMT00063533	MMT00049504	0.0342176	undirected	Ms4a4b	Slc6a4
MMT00063533	MMT00074183	0.214179	undirected	Ms4a4b	Wrb
MMT00063533	MMT00073625	0.0842716	undirected	Ms4a4b	A230065H16Rik
MMT00063533	MMT00045159	0.11821	undirected	Ms4a4b	Cbs
MMT00063533	MMT00074216	0.0462502	undirected	Ms4a4b	Cyp2b19
MMT00063533	MMT00008639	0.0334355	undirected	Ms4a4b	Olfr975
MMT00063533	MMT00004176	0.149248	undirected	Ms4a4b	Cybb
MMT00063533	MMT00044885	0.0602521	undirected	Ms4a4b	Capn9
MMT00063533	MMT00028197	0.0259013	undirected	Ms4a4b	4930438A08Rik
MMT00063533	MMT00006698	0.0464053	undirected	Ms4a4b	Olfr667
MMT00063533	MMT00029202	0.0430938	undirected	Ms4a4b	Rgs7
MMT00063533	MMT00071233	0.111036	undirected	Ms4a4b	Pou2af1
MMT00063533	MMT00017138	0.0352321	undirected	Ms4a4b	Myo3a
MMT00063533	MMT00009424	0.0889335	undirected	Ms4a4b	Traf2
MMT00063533	MMT00010285	0.110918	undirected	Ms4a4b	Pzp
MMT00063533	MMT00021948	0.050201	undirected	Ms4a4b	Sf3a2
MMT00063533	MMT00078069	0.174781	undirected	Ms4a4b	1810010H24Rik
MMT00063533	MMT00037199	0.0720153	undirected	Ms4a4b	Adcy9
MMT00063533	MMT00038396	0.0529895	undirected	Ms4a4b	Bglap2
MMT00063533	MMT00006323	0.0734355	undirected	Ms4a4b	Ache
MMT00063533	MMT00033506	0.0390395	undirected	Ms4a4b	4632427E13Rik
MMT00063533	MMT00022784	0.123527	undirected	Ms4a4b	Usp18
MMT00063533	MMT00003475	0.127316	undirected	Ms4a4b	Alg12
MMT00063533	MMT00026973	0.122648	undirected	Ms4a4b	Mx1
MMT00063533	MMT00020871	0.0714262	undirected	Ms4a4b	Fcer1a
MMT00063533	MMT00081348	0.229072	undirected	Ms4a4b	Myo1f
MMT00063533	MMT00081727	0.0735843	undirected	Ms4a4b	Tbc1d12
MMT00063533	MMT00018994	0.0336389	undirected	Ms4a4b	Akp3
MMT00063533	MMT00043936	0.13376	undirected	Ms4a4b	Cd48
MMT00063533	MMT00018014	0.0774635	undirected	Ms4a4b	Pard6g
MMT00063533	MMT00058269	0.0309649	undirected	Ms4a4b	Tas2r105
MMT00063533	MMT00031488	0.149619	undirected	Ms4a4b	Sorl1
MMT00063533	MMT00046154	0.0628621	undirected	Ms4a4b	9330182L06Rik
MMT00063533	MMT00032750	0.027225	undirected	Ms4a4b	Atp1b4
MMT00063533	MMT00031340	0.0543882	undirected	Ms4a4b	Nfasc
MMT00063533	MMT00056668	0.0659022	undirected	Ms4a4b	Ccl28
MMT00063533	MMT00069732	0.0598199	undirected	Ms4a4b	Calb1
MMT00063533	MMT00049304	0.183139	undirected	Ms4a4b	Cyp3a13
MMT00063533	MMT00037740	0.115991	undirected	Ms4a4b	Ptpro
MMT00063533	MMT00078782	0.0260324	undirected	Ms4a4b	Mpp2
MMT00063533	MMT00048579	0.0244381	undirected	Ms4a4b	Nrap
MMT00063533	MMT00026943	0.0644549	undirected	Ms4a4b	Rorb
MMT00063533	MMT00014106	0.084153	undirected	Ms4a4b	4933400C23
MMT00063533	MMT00015455	0.0350968	undirected	Ms4a4b	4930550C17Rik
MMT00063533	MMT00036143	0.0380624	undirected	Ms4a4b	Glipr2
MMT00063533	MMT00000760	0.0497155	undirected	Ms4a4b	Tcrb-J
MMT00063533	MMT00071842	0.118951	undirected	Ms4a4b	Prrx2
MMT00063533	MMT00007073	0.0704724	undirected	Ms4a4b	Lrrc2
MMT00063533	MMT00038361	0.128545	undirected	Ms4a4b	Tgfbr3
MMT00063533	MMT00035279	0.0749471	undirected	Ms4a4b	Fez1
MMT00063533	MMT00053906	0.0275869	undirected	Ms4a4b	Hao1
MMT00063533	MMT00061212	0.0833851	undirected	Ms4a4b	Ccnd1
MMT00063533	MMT00082175	0.0754556	undirected	Ms4a4b	Cdh3
MMT00063533	MMT00070310	0.112682	undirected	Ms4a4b	Kctd12
MMT00063533	MMT00046734	0.156332	undirected	Ms4a4b	Sardh
MMT00063533	MMT00038451	0.106187	undirected	Ms4a4b	4930417G10Rik
MMT00063533	MMT00020883	0.0786115	undirected	Ms4a4b	Kit
MMT00010083	MMT00033205	0.021432	undirected	Cyp4f15	Cst7
MMT00010083	MMT00079177	0.0288735	undirected	Cyp4f15	Card14
[truncated: 46,841 more rows]
