# Supplementary material for: Co-expression network analysis identified hub genes critical to triglyceride and free fatty acid metabolism as key regulators of age-related vascular dysfunction in mice
Source: Aging (Albany NY). 2019 Sep 12;11(18):7620–38. doi: 10.18632/aging.102275 (PMC6781998; doi:10.18632/aging.102275)
Supplement: Supplementary Table 15 [file aging-11-102275-s005.xlsx]

## Sheet: Sheet1
Supplementary Table 15. Betweeness centrality analysis of genes within the turquoise-blue modules with CytoNCA.
ranked by betweeness
Fcgr1	Betweenness: 174.85756
Skiv2l	Betweenness: 174.29724
Ctdsp2	Betweenness: 172.37753
Mx1	Betweenness: 170.04597
Cdon	Betweenness: 169.8522
Enpp5	Betweenness: 168.82785
Fetub	Betweenness: 167.45273
Cab39	Betweenness: 165.89679
Fgd2	Betweenness: 157.76903
Igfbp4	Betweenness: 154.76915
Fcer1a	Betweenness: 151.26419
Ptgfrn	Betweenness: 150.43445
Dpys	Betweenness: 148.4984
Wrb	Betweenness: 147.4084
Olfr1504	Betweenness: 146.0977
Kctd12	Betweenness: 145.92998
Cd68	Betweenness: 145.6642
Tgfbr3	Betweenness: 144.36337
Sorl1	Betweenness: 143.95557
BC026585	Betweenness: 142.8362
Pard6g	Betweenness: 141.64519
Trem2	Betweenness: 141.3596
Ms4a4b	Betweenness: 140.25351
Rorb	Betweenness: 139.56021
Sardh	Betweenness: 137.27927
Tcrb-J	Betweenness: 137.1358
Agxt	Betweenness: 136.61696
Il28ra	Betweenness: 136.43895
Slc15a3	Betweenness: 134.97804
Mdk	Betweenness: 134.29968
G6pc2	Betweenness: 134.26224
Glra1	Betweenness: 133.25082
Csf1r	Betweenness: 132.56671
Hic1	Betweenness: 132.37222
Hcrtr1	Betweenness: 131.33116
Cst9	Betweenness: 130.33267
H2-DMb1	Betweenness: 129.70381
Slc22a18	Betweenness: 129.53886
Vnn1	Betweenness: 129.29892
Slc9a9	Betweenness: 129.1159
2210020M01Rik	Betweenness: 128.41365
1500009C09Rik	Betweenness: 126.86549
Tnmd	Betweenness: 126.827126
Sf3a2	Betweenness: 126.76549
Alms1	Betweenness: 126.30366
Bpgm	Betweenness: 125.52711
Gmip	Betweenness: 125.28143
Insrr	Betweenness: 125.03868
Rfx4	Betweenness: 124.0803
Myo1f	Betweenness: 122.433624
Pkp1	Betweenness: 122.31394
Gdap1	Betweenness: 122.0587
Olig1	Betweenness: 121.385735
Cdkn2a	Betweenness: 121.15526
Adra2c	Betweenness: 121.136734
Slc25a30	Betweenness: 120.955124
Dbnl	Betweenness: 120.94813
Ifitm6	Betweenness: 118.918365
9430091E24Rik	Betweenness: 118.32208
Prkar1b	Betweenness: 118.30782
Ubtf	Betweenness: 116.72495
Col13a1	Betweenness: 115.62616
BC013712	Betweenness: 115.44754
Doc2g	Betweenness: 114.173485
Serpinb13	Betweenness: 113.53131
Bai2	Betweenness: 113.24386
C530028O21Rik	Betweenness: 112.88592
Pi15	Betweenness: 111.93608
Gas7	Betweenness: 111.87648
Efemp1	Betweenness: 111.85779
Cxcr6	Betweenness: 111.30291
Prosapip1	Betweenness: 110.182434
Chn1	Betweenness: 110.03496
Slc6a4	Betweenness: 109.26819
Cyp3a13	Betweenness: 108.36763
Ms4a4d	Betweenness: 108.337814
Clcn1	Betweenness: 108.25506
Calb1	Betweenness: 107.94835
Nme4	Betweenness: 106.82462
1190002N15Rik	Betweenness: 106.51678
Pik3cd	Betweenness: 106.086975
Myoc	Betweenness: 105.789
Acr	Betweenness: 105.74687
Anxa8	Betweenness: 105.10277
Cabp5	Betweenness: 104.05784
Hs6st1	Betweenness: 103.24674
Il17re	Betweenness: 103.17777
Ccr5	Betweenness: 102.896835
Aamp	Betweenness: 102.77809
Rasa4	Betweenness: 102.31305
Olfr1265	Betweenness: 102.25014
Diap3	Betweenness: 101.984726
Ahsg	Betweenness: 101.72045
H2-Q7	Betweenness: 100.96611
Frzb	Betweenness: 100.80425
Pik3cg	Betweenness: 100.68246
Ache	Betweenness: 100.67609
Fbln5	Betweenness: 100.4797
Ccnd1	Betweenness: 100.29814
1600029D21Rik	Betweenness: 100.175095
Rgs1	Betweenness: 100.047066
Wt1	Betweenness: 98.48685
9330182L06Rik	Betweenness: 97.32887
Homer3	Betweenness: 96.829865
Atp1a3	Betweenness: 96.69658
Prrx2	Betweenness: 94.87018
Grb10	Betweenness: 94.681564
Trim9	Betweenness: 94.29517
Clic3	Betweenness: 94.21852
Sema5a	Betweenness: 93.90085
Gpnmb	Betweenness: 92.689224
Oxtr	Betweenness: 92.53312
Ece2	Betweenness: 92.27988
Plcb1	Betweenness: 92.25704
Rgs18	Betweenness: 91.15434
Folr2	Betweenness: 90.910645
Ngb	Betweenness: 90.6773
Mmp20	Betweenness: 90.67487
Mpp2	Betweenness: 90.57525
Mrc1	Betweenness: 90.460495
Mmp2	Betweenness: 90.343666
4932414N04Rik	Betweenness: 90.24284
Jrk	Betweenness: 89.83547
Cpa3	Betweenness: 89.13884
Pdxp	Betweenness: 88.46646
Scn1b	Betweenness: 88.11442
Ccl24	Betweenness: 88.05445
Col8a1	Betweenness: 87.893715
Bmper	Betweenness: 87.758125
Bid	Betweenness: 87.34458
Card14	Betweenness: 86.85477
Klhl6	Betweenness: 86.45789
Ptpro	Betweenness: 85.878876
D430019H16Rik	Betweenness: 85.75133
Mcpt4	Betweenness: 85.22194
Gal3st1	Betweenness: 84.53508
Fez1	Betweenness: 84.17236
Chst2	Betweenness: 83.49344
Hpgd	Betweenness: 82.73652
Drd1a	Betweenness: 82.73194
Retnla	Betweenness: 82.41214
F3	Betweenness: 81.599846
Rtn4rl1	Betweenness: 81.31891
Sdc3	Betweenness: 80.79175
Cybb	Betweenness: 80.768364
A230065H16Rik	Betweenness: 80.70045
Dok2	Betweenness: 80.37452
Olfr1052	Betweenness: 79.36551
Gdf10	Betweenness: 79.08198
Mill1	Betweenness: 78.95935
Mx2	Betweenness: 78.93519
Capn9	Betweenness: 78.88686
Oit3	Betweenness: 78.82656
Itgb7	Betweenness: 78.64398
Pzp	Betweenness: 78.62586
Sfrp2	Betweenness: 77.970314
P2rx7	Betweenness: 77.58291
Olfr729	Betweenness: 76.814064
Fmod	Betweenness: 76.65905
Cd48	Betweenness: 76.55493
Icam1	Betweenness: 76.52677
Yars	Betweenness: 76.425224
Nrap	Betweenness: 76.30807
4930417G10Rik	Betweenness: 75.816895
Tbc1d12	Betweenness: 75.77744
Kctd16	Betweenness: 75.60554
Arid2	Betweenness: 74.97551
C1qa	Betweenness: 74.13279
Olfr575	Betweenness: 73.96847
Nfasc	Betweenness: 73.331825
4833427G06Rik	Betweenness: 73.28921
Sncaip	Betweenness: 73.16282
Rarres1	Betweenness: 73.15814
Atp1b4	Betweenness: 73.096756
Htr1a	Betweenness: 73.05516
Mak	Betweenness: 72.73186
Olfr470	Betweenness: 72.65778
Alg12	Betweenness: 71.85398
Igfbp2	Betweenness: 71.81885
Tnnc2	Betweenness: 71.62044
Mgst2	Betweenness: 71.21676
Pcdhb13	Betweenness: 70.97998
Gjb3	Betweenness: 70.88224
1700093K21Rik	Betweenness: 70.83763
Cdh16	Betweenness: 70.79455
1700015G11Rik	Betweenness: 70.7481
Npl	Betweenness: 70.09095
Ly86	Betweenness: 69.798096
Cst7	Betweenness: 69.761894
Arid3a	Betweenness: 69.50517
Adam34	Betweenness: 69.328476
Mlana	Betweenness: 69.15907
Cdh3	Betweenness: 68.87113
Ppfia4	Betweenness: 68.70684
Gp49a	Betweenness: 68.23436
Syt10	Betweenness: 67.95073
Pgc	Betweenness: 67.90243
AW146020	Betweenness: 67.881325
Ear11	Betweenness: 67.6329
Muc4	Betweenness: 66.82359
Gyk	Betweenness: 66.21533
Exo1	Betweenness: 65.987366
1810010H24Rik	Betweenness: 65.62491
Kbtbd10	Betweenness: 65.37549
2010107G23Rik	Betweenness: 64.99973
Apod	Betweenness: 64.65321
Gzmk	Betweenness: 64.50057
Il10ra	Betweenness: 64.26105
Glipr2	Betweenness: 64.214134
Cbs	Betweenness: 64.100266
Pou2af1	Betweenness: 63.81069
Kif1a	Betweenness: 63.614014
Ptprf	Betweenness: 63.14307
Cd84	Betweenness: 63.095234
Ccl5	Betweenness: 62.963047
Csf3	Betweenness: 62.53933
Ass1	Betweenness: 61.636005
H2-DMa	Betweenness: 61.63107
Sox11	Betweenness: 60.680508
Aox1	Betweenness: 60.605816
Cyp4f15	Betweenness: 59.10658
Lyl1	Betweenness: 58.967926
Traf2	Betweenness: 58.80772
Nova1	Betweenness: 57.805477
Slfn4	Betweenness: 57.796818
Pln	Betweenness: 57.789867
Crybb3	Betweenness: 57.542786
Ntn1	Betweenness: 57.14668
Cpxm2	Betweenness: 56.707893
Adcy1	Betweenness: 56.680977
Msx2	Betweenness: 55.71881
Ibsp	Betweenness: 55.390675
Slc6a18	Betweenness: 55.38681
Zfp287	Betweenness: 54.98788
Rem2	Betweenness: 54.492527
Pcdhb6	Betweenness: 54.27583
Fbxo32	Betweenness: 54.273037
Spry1	Betweenness: 54.26405
Rest	Betweenness: 54.20498
Podn	Betweenness: 54.073032
Ank1	Betweenness: 53.870842
Chrna4	Betweenness: 53.422306
Pak1	Betweenness: 53.17475
S100a3	Betweenness: 53.026093
Ankrd1	Betweenness: 52.203083
Cps1	Betweenness: 52.16324
Cacng5	Betweenness: 52.136192
Svs5	Betweenness: 52.110126
Olfr24	Betweenness: 51.817986
Trpv5	Betweenness: 51.74329
Fcna	Betweenness: 50.975533
Kcne1l	Betweenness: 50.430145
Acsl6	Betweenness: 49.950447
Serpinb6b	Betweenness: 49.86451
4931428L18Rik	Betweenness: 49.658295
4933400C23	Betweenness: 49.366623
Cntn1	Betweenness: 48.88267
Tob2	Betweenness: 48.713337
Myo3a	Betweenness: 48.617275
Fmnl1	Betweenness: 48.589
Crlf1	Betweenness: 48.473476
Cacna2d3	Betweenness: 48.405163
Plek	Betweenness: 48.32004
Cyp2s1	Betweenness: 48.100166
Il3ra	Betweenness: 48.06133
Ltbp2	Betweenness: 47.968643
Fads1	Betweenness: 47.751007
Vps52	Betweenness: 47.30956
Sc4mol	Betweenness: 47.250046
Dpp7	Betweenness: 47.154743
Sppl3	Betweenness: 46.330143
Gk2	Betweenness: 46.19025
3110009E18Rik	Betweenness: 45.905266
Rnf103	Betweenness: 45.075073
Scn3b	Betweenness: 44.67116
Adra2a	Betweenness: 44.17687
Etv4	Betweenness: 43.98688
1700011F03Rik	Betweenness: 43.492867
Abcc6	Betweenness: 43.287216
Coq3	Betweenness: 42.43426
Upk1b	Betweenness: 42.193176
Cd83	Betweenness: 42.03736
Nid2	Betweenness: 42.01259
Rgs7	Betweenness: 41.935463
Serpina1d	Betweenness: 41.85236
Dach2	Betweenness: 41.819653
Tnr	Betweenness: 41.642384
Foxo6	Betweenness: 41.073338
Kcnk5	Betweenness: 41.026764
4632427E13Rik	Betweenness: 40.961216
Olfr975	Betweenness: 40.842087
Adcy9	Betweenness: 40.773247
Hspa8	Betweenness: 40.68398
Ccl28	Betweenness: 39.946156
Bglap2	Betweenness: 39.94254
1700025G04Rik	Betweenness: 39.654907
Coch	Betweenness: 39.28612
Lrrc4b	Betweenness: 39.140343
Plekhb2	Betweenness: 39.08473
Cyp2b19	Betweenness: 39.066837
Abp1	Betweenness: 38.948368
Cnksr2	Betweenness: 38.775
Cntn6	Betweenness: 38.742508
Slc35d1	Betweenness: 38.306213
Irf7	Betweenness: 37.589275
Lcp1	Betweenness: 37.209797
Pprc1	Betweenness: 36.65963
4933402N03Rik	Betweenness: 36.335976
Tnfaip2	Betweenness: 36.031425
Cd79b	Betweenness: 35.82887
Itih3	Betweenness: 35.827538
4933405O20Rik	Betweenness: 34.73361
Slc15a2	Betweenness: 34.2729
Tas2r105	Betweenness: 34.23584
Tmie	Betweenness: 33.78935
Kit	Betweenness: 33.037712
Slpi	Betweenness: 31.67966
Akr1c12	Betweenness: 31.145721
Scx	Betweenness: 31.05404
Akp3	Betweenness: 30.559454
Tyrobp	Betweenness: 30.300169
Prss12	Betweenness: 30.295132
Usp18	Betweenness: 29.296894
Olfr630	Betweenness: 28.811111
Foxn2	Betweenness: 28.718872
Folh1	Betweenness: 28.705872
Lrrc2	Betweenness: 28.403366
Ifi47	Betweenness: 28.182695
4930550C17Rik	Betweenness: 27.400072
Arg1	Betweenness: 27.125364
Hao1	Betweenness: 26.805103
Gsg1	Betweenness: 26.430632
Crym	Betweenness: 25.77411
Olfr667	Betweenness: 25.717888
Ttc12	Betweenness: 24.899137
Ptges	Betweenness: 24.882215
Uchl1	Betweenness: 24.880966
Itgb2	Betweenness: 24.657547
Mbd2	Betweenness: 24.29373
Hcst	Betweenness: 23.138027
Sertad3	Betweenness: 22.772652
Mycs	Betweenness: 21.717766
Ropn1	Betweenness: 21.15385
Cpa4	Betweenness: 20.41042
Cdc6	Betweenness: 19.727142
1700065I16Rik	Betweenness: 18.624008
Fdft1	Betweenness: 18.49687
Slc6a15	Betweenness: 18.193289
Prnd	Betweenness: 17.947649
Trpc4	Betweenness: 16.671461
Ier3	Betweenness: 15.589007
4930438A08Rik	Betweenness: 12.763018
Atp8a2	Betweenness: 11.565988
Ptgs2	Betweenness: 11.339145
