# Supplementary material for: Co-expression network analysis identified hub genes critical to triglyceride and free fatty acid metabolism as key regulators of age-related vascular dysfunction in mice
Source: Aging (Albany NY). 2019 Sep 12;11(18):7620–38. doi: 10.18632/aging.102275 (PMC6781998; doi:10.18632/aging.102275)
Supplement: Supplementary Table 16 [file aging-11-102275-s016.xlsx]

## Sheet: Sheet1
Supplementary Table 16. Edge list of genes within blue module that is read in VisANT.
Jph3	Flrt2	0	M0039	0.0640137
Jph3	Chek2	0	M0039	0.132261
Jph3	9230104L09Rik	0	M0039	0.185091
Jph3	Ifi202b	0	M0039	0.0779455
Jph3	Pcdhb15	0	M0039	0.0282884
Jph3	Kcnh8	0	M0039	0.126011
Jph3	4930578C19Rik	0	M0039	0.0741582
Jph3	Map3k2	0	M0039	0.071727
Jph3	Akr1c6	0	M0039	0.0654365
Jph3	Olfr716	0	M0039	0.0154036
Jph3	Gga1	0	M0039	0.060057
Jph3	Rasgrp4	0	M0039	0.0276687
Jph3	Sim1	0	M0039	0.0291185
Jph3	Olfr1298	0	M0039	0.04745
Jph3	Stard8	0	M0039	0.0226642
Jph3	Fbxo16	0	M0039	0.0484198
Jph3	2810474O19Rik	0	M0039	0.0350167
Jph3	Osm	0	M0039	0.00869511
Jph3	Upp1	0	M0039	0.0162281
Jph3	Cyp11a1	0	M0039	0.0667244
Jph3	Olfr878	0	M0039	0.0727155
Jph3	Mfi2	0	M0039	0.032789
Jph3	Ifit1	0	M0039	0.0375741
Jph3	Krtap16-5	0	M0039	0.0606109
Jph3	Ifit3	0	M0039	0.0252315
Jph3	Olfr420	0	M0039	0.0458513
Jph3	Galnt3	0	M0039	0.0782077
Jph3	4933424G06Rik	0	M0039	0.0515036
Jph3	Mepe	0	M0039	0.0593696
Jph3	Npy	0	M0039	0.0216706
Jph3	Tcf21	0	M0039	0.0508141
Jph3	Tnfsf4	0	M0039	0.0718038
Jph3	Socs3	0	M0039	0.0266908
Jph3	Cyp19a1	0	M0039	0.0292205
Jph3	Olfr2	0	M0039	0.0206127
Jph3	Crb1	0	M0039	0.0399492
Jph3	Fabp1	0	M0039	0.0299013
Jph3	Sult1e1	0	M0039	0.00883937
Jph3	Nkg7	0	M0039	0.0784715
Jph3	Snca	0	M0039	0.00739518
Jph3	Rab25	0	M0039	0.0265869
Jph3	Abcg8	0	M0039	0.0901511
Jph3	Slc26a3	0	M0039	0.010637
Jph3	Lair1	0	M0039	0.056801
Jph3	4930485B16Rik	0	M0039	0.0480302
Jph3	Cyp2b9	0	M0039	0.0661214
Jph3	Olfr1501	0	M0039	0.0482506
Jph3	4930470P17Rik	0	M0039	0.0205453
Jph3	Jarid2	0	M0039	0.065604
Jph3	Olfr1477	0	M0039	0.0526364
Jph3	D14Ertd668e	0	M0039	0.0737937
Jph3	Dclre1c	0	M0039	0.0452521
Jph3	Ms4a1	0	M0039	0.0366636
Jph3	Slamf1	0	M0039	0.0112641
Jph3	Klrb1c	0	M0039	0.0638437
Jph3	Napb	0	M0039	0.0183373
Jph3	Plg	0	M0039	0.0412377
Jph3	Dner	0	M0039	0.0456093
Jph3	Epb4.2	0	M0039	0.0430172
Jph3	Gypa	0	M0039	0.0251774
Jph3	Btk	0	M0039	0.0241095
Jph3	Olfr430	0	M0039	0.045431
Jph3	Ephb1	0	M0039	0.0360173
Jph3	Adamts7	0	M0039	0.0625915
Jph3	Nrxn3	0	M0039	0.0333575
Jph3	Hs6st3	0	M0039	0.0177759
Jph3	Gfra2	0	M0039	0.0472675
Jph3	2010106E10Rik	0	M0039	0.0371109
Jph3	Olfr645	0	M0039	0.0335099
Jph3	Insm1	0	M0039	0.0320197
Jph3	Gfra3	0	M0039	0.0859682
Jph3	Tox	0	M0039	0.0345072
Jph3	Olfr803	0	M0039	0.0787235
Jph3	Ptger1	0	M0039	0.0147635
Jph3	Olfr686	0	M0039	0.10293
Jph3	Il6	0	M0039	0.0619611
Jph3	Oas1a	0	M0039	0.0281403
Jph3	Prps1	0	M0039	0.0351811
Jph3	Bspry	0	M0039	0.0279463
Jph3	Pla2g2f	0	M0039	0.0301597
Jph3	1700007B14Rik	0	M0039	0.0102436
Jph3	Stk32a	0	M0039	0.077891
Jph3	Olfr1272	0	M0039	0.0373392
Jph3	Grin1	0	M0039	0.0667427
Jph3	Erdr1	0	M0039	0.0429617
Jph3	Cyp2b10	0	M0039	0.0470794
Jph3	4930583H14Rik	0	M0039	0.0894184
Jph3	Zfp454	0	M0039	0.0292184
Jph3	Vax1	0	M0039	0.0503006
Jph3	Hyal4	0	M0039	0.0102795
Jph3	Ephb4	0	M0039	0.082666
Jph3	Olfr281	0	M0039	0.0584478
Jph3	Cacna1b	0	M0039	0.020106
Jph3	Pilra	0	M0039	0.120441
Jph3	Tcp10a	0	M0039	0.0210218
Jph3	Gap43	0	M0039	0.101011
Jph3	Mid2	0	M0039	0.0407998
Jph3	Casc1	0	M0039	0.0338202
Jph3	Aqp9	0	M0039	0.0595942
Jph3	Omt2a	0	M0039	0.0313343
Jph3	Arhgap24	0	M0039	0.0193869
Jph3	Cacna1a	0	M0039	0.0455869
Jph3	Zp1	0	M0039	0.0501853
Jph3	Sva	0	M0039	0.0773973
Jph3	Olfr923	0	M0039	0.0536743
Jph3	Ctps2	0	M0039	0.0281873
Jph3	Lyzl1	0	M0039	0.0258382
Jph3	Dsc1	0	M0039	0.0580026
Jph3	Clca4	0	M0039	0.0716842
Jph3	Tead4	0	M0039	0.0227998
Jph3	Olfr463	0	M0039	0.0359048
Jph3	Insl5	0	M0039	0.0293904
Jph3	2010003O02Rik	0	M0039	0.100126
Jph3	Samd8	0	M0039	0.045181
Flrt2	Chek2	0	M0039	0.0734217
Flrt2	9230104L09Rik	0	M0039	0.0766735
Flrt2	Ifi202b	0	M0039	0.0176121
Flrt2	Pcdhb15	0	M0039	0.0265482
Flrt2	Kcnh8	0	M0039	0.0684597
Flrt2	4930578C19Rik	0	M0039	0.0787318
Flrt2	Map3k2	0	M0039	0.13915
Flrt2	Akr1c6	0	M0039	0.0493783
Flrt2	Olfr716	0	M0039	0.0135721
Flrt2	Gga1	0	M0039	0.0612773
Flrt2	Rasgrp4	0	M0039	0.0598509
Flrt2	Sim1	0	M0039	0.0105695
Flrt2	Olfr1298	0	M0039	0.0837404
Flrt2	Stard8	0	M0039	0.0214479
Flrt2	Fbxo16	0	M0039	0.0619749
Flrt2	2810474O19Rik	0	M0039	0.0180926
Flrt2	Osm	0	M0039	0.00536824
Flrt2	Upp1	0	M0039	0.0172775
Flrt2	Cyp11a1	0	M0039	0.103914
Flrt2	Olfr878	0	M0039	0.137154
Flrt2	Mfi2	0	M0039	0.0462801
Flrt2	Ifit1	0	M0039	0.0136274
Flrt2	Krtap16-5	0	M0039	0.0362674
Flrt2	Ifit3	0	M0039	0.0152854
Flrt2	Olfr420	0	M0039	0.0120229
Flrt2	Galnt3	0	M0039	0.044619
Flrt2	4933424G06Rik	0	M0039	0.0902421
Flrt2	Mepe	0	M0039	0.0173128
Flrt2	Npy	0	M0039	0.0160936
Flrt2	Tcf21	0	M0039	0.0583435
Flrt2	Tnfsf4	0	M0039	0.039823
Flrt2	Socs3	0	M0039	0.0369503
Flrt2	Cyp19a1	0	M0039	0.0232501
Flrt2	Olfr2	0	M0039	0.0166844
Flrt2	Crb1	0	M0039	0.0389147
Flrt2	Fabp1	0	M0039	0.018071
Flrt2	Sult1e1	0	M0039	0.0146034
Flrt2	Nkg7	0	M0039	0.160189
Flrt2	Snca	0	M0039	0.0117685
Flrt2	Rab25	0	M0039	0.0704134
Flrt2	Abcg8	0	M0039	0.0280871
Flrt2	Slc26a3	0	M0039	0.00796921
Flrt2	Lair1	0	M0039	0.0395651
Flrt2	4930485B16Rik	0	M0039	0.0774922
Flrt2	Cyp2b9	0	M0039	0.0409913
Flrt2	Olfr1501	0	M0039	0.0353318
Flrt2	4930470P17Rik	0	M0039	0.0124488
Flrt2	Jarid2	0	M0039	0.142813
Flrt2	Olfr1477	0	M0039	0.010613
Flrt2	D14Ertd668e	0	M0039	0.0557119
Flrt2	Dclre1c	0	M0039	0.0321862
Flrt2	Ms4a1	0	M0039	0.0895227
Flrt2	Slamf1	0	M0039	0.00997849
Flrt2	Klrb1c	0	M0039	0.0977066
Flrt2	Napb	0	M0039	0.0446866
Flrt2	Plg	0	M0039	0.0683831
Flrt2	Dner	0	M0039	0.0375504
Flrt2	Epb4.2	0	M0039	0.0395079
Flrt2	Gypa	0	M0039	0.0351836
Flrt2	Btk	0	M0039	0.0535866
Flrt2	Olfr430	0	M0039	0.0609981
Flrt2	Ephb1	0	M0039	0.022024
Flrt2	Adamts7	0	M0039	0.0487067
Flrt2	Nrxn3	0	M0039	0.0177775
Flrt2	Hs6st3	0	M0039	0.0083564
Flrt2	Gfra2	0	M0039	0.08961
Flrt2	2010106E10Rik	0	M0039	0.13858
Flrt2	Olfr645	0	M0039	0.0163346
Flrt2	Insm1	0	M0039	0.0347249
Flrt2	Gfra3	0	M0039	0.0406762
Flrt2	Tox	0	M0039	0.00849183
Flrt2	Olfr803	0	M0039	0.0181059
Flrt2	Ptger1	0	M0039	0.0216631
Flrt2	Olfr686	0	M0039	0.0510593
Flrt2	Il6	0	M0039	0.080495
Flrt2	Oas1a	0	M0039	0.014753
Flrt2	Prps1	0	M0039	0.0253498
Flrt2	Bspry	0	M0039	0.0139412
Flrt2	Pla2g2f	0	M0039	0.0221124
Flrt2	1700007B14Rik	0	M0039	0.012313
Flrt2	Stk32a	0	M0039	0.0758663
Flrt2	Olfr1272	0	M0039	0.0280587
Flrt2	Grin1	0	M0039	0.0871216
Flrt2	Erdr1	0	M0039	0.020103
Flrt2	Cyp2b10	0	M0039	0.023299
Flrt2	4930583H14Rik	0	M0039	0.105084
Flrt2	Zfp454	0	M0039	0.0223978
Flrt2	Vax1	0	M0039	0.0525508
Flrt2	Hyal4	0	M0039	0.0144018
Flrt2	Ephb4	0	M0039	0.053334
Flrt2	Olfr281	0	M0039	0.0705032
Flrt2	Cacna1b	0	M0039	0.0233325
Flrt2	Pilra	0	M0039	0.127655
Flrt2	Tcp10a	0	M0039	0.0205175
Flrt2	Gap43	0	M0039	0.0977904
Flrt2	Mid2	0	M0039	0.0401913
Flrt2	Casc1	0	M0039	0.0386021
Flrt2	Aqp9	0	M0039	0.0366485
Flrt2	Omt2a	0	M0039	0.0265465
Flrt2	Arhgap24	0	M0039	0.0401288
Flrt2	Cacna1a	0	M0039	0.0706755
Flrt2	Zp1	0	M0039	0.0236587
Flrt2	Sva	0	M0039	0.0601028
Flrt2	Olfr923	0	M0039	0.12059
Flrt2	Ctps2	0	M0039	0.0163899
Flrt2	Lyzl1	0	M0039	0.0334232
Flrt2	Dsc1	0	M0039	0.121542
Flrt2	Clca4	0	M0039	0.0533141
Flrt2	Tead4	0	M0039	0.0518701
Flrt2	Olfr463	0	M0039	0.0254499
Flrt2	Insl5	0	M0039	0.0453239
Flrt2	2010003O02Rik	0	M0039	0.0478211
Flrt2	Samd8	0	M0039	0.0233738
Chek2	9230104L09Rik	0	M0039	0.126848
Chek2	Ifi202b	0	M0039	0.114508
Chek2	Pcdhb15	0	M0039	0.021521
Chek2	Kcnh8	0	M0039	0.143568
Chek2	4930578C19Rik	0	M0039	0.120799
Chek2	Map3k2	0	M0039	0.087892
Chek2	Akr1c6	0	M0039	0.0811263
Chek2	Olfr716	0	M0039	0.0288888
Chek2	Gga1	0	M0039	0.0647944
Chek2	Rasgrp4	0	M0039	0.0147174
Chek2	Sim1	0	M0039	0.0326551
Chek2	Olfr1298	0	M0039	0.0788243
Chek2	Stard8	0	M0039	0.0739607
Chek2	Fbxo16	0	M0039	0.0617869
Chek2	2810474O19Rik	0	M0039	0.0533744
Chek2	Osm	0	M0039	0.0269942
Chek2	Upp1	0	M0039	0.034748
Chek2	Cyp11a1	0	M0039	0.109576
Chek2	Olfr878	0	M0039	0.111091
Chek2	Mfi2	0	M0039	0.0432861
Chek2	Ifit1	0	M0039	0.0515541
Chek2	Krtap16-5	0	M0039	0.105964
Chek2	Ifit3	0	M0039	0.040582
Chek2	Olfr420	0	M0039	0.0684915
Chek2	Galnt3	0	M0039	0.0723372
Chek2	4933424G06Rik	0	M0039	0.046422
Chek2	Mepe	0	M0039	0.0417331
Chek2	Npy	0	M0039	0.0333359
Chek2	Tcf21	0	M0039	0.0562558
Chek2	Tnfsf4	0	M0039	0.0600377
Chek2	Socs3	0	M0039	0.0334284
Chek2	Cyp19a1	0	M0039	0.0802573
Chek2	Olfr2	0	M0039	0.0584782
Chek2	Crb1	0	M0039	0.055092
Chek2	Fabp1	0	M0039	0.0174021
Chek2	Sult1e1	0	M0039	0.00599261
Chek2	Nkg7	0	M0039	0.0728326
Chek2	Snca	0	M0039	0.0147905
Chek2	Rab25	0	M0039	0.0468741
Chek2	Abcg8	0	M0039	0.17355
Chek2	Slc26a3	0	M0039	0.00444575
Chek2	Lair1	0	M0039	0.046348
Chek2	4930485B16Rik	0	M0039	0.0669358
Chek2	Cyp2b9	0	M0039	0.034744
Chek2	Olfr1501	0	M0039	0.0325051
Chek2	4930470P17Rik	0	M0039	0.041577
Chek2	Jarid2	0	M0039	0.0667916
Chek2	Olfr1477	0	M0039	0.0342793
Chek2	D14Ertd668e	0	M0039	0.115092
Chek2	Dclre1c	0	M0039	0.0428005
Chek2	Ms4a1	0	M0039	0.0312557
Chek2	Slamf1	0	M0039	0.0298995
Chek2	Klrb1c	0	M0039	0.0912449
Chek2	Napb	0	M0039	0.0334568
Chek2	Plg	0	M0039	0.0459872
Chek2	Dner	0	M0039	0.08097
Chek2	Epb4.2	0	M0039	0.0510754
Chek2	Gypa	0	M0039	0.0496458
Chek2	Btk	0	M0039	0.0496718
Chek2	Olfr430	0	M0039	0.0394446
Chek2	Ephb1	0	M0039	0.0589686
Chek2	Adamts7	0	M0039	0.142323
Chek2	Nrxn3	0	M0039	0.0901576
Chek2	Hs6st3	0	M0039	0.0218547
Chek2	Gfra2	0	M0039	0.0408341
Chek2	2010106E10Rik	0	M0039	0.0462098
Chek2	Olfr645	0	M0039	0.0400764
Chek2	Insm1	0	M0039	0.0506725
Chek2	Gfra3	0	M0039	0.0979527
Chek2	Tox	0	M0039	0.011358
Chek2	Olfr803	0	M0039	0.168935
Chek2	Ptger1	0	M0039	0.0345165
Chek2	Olfr686	0	M0039	0.159219
Chek2	Il6	0	M0039	0.0898195
Chek2	Oas1a	0	M0039	0.0264336
Chek2	Prps1	0	M0039	0.0508259
Chek2	Bspry	0	M0039	0.0446693
Chek2	Pla2g2f	0	M0039	0.0226819
Chek2	1700007B14Rik	0	M0039	0.0103506
Chek2	Stk32a	0	M0039	0.0838789
Chek2	Olfr1272	0	M0039	0.0663747
Chek2	Grin1	0	M0039	0.0921165
Chek2	Erdr1	0	M0039	0.0388974
Chek2	Cyp2b10	0	M0039	0.0312069
Chek2	4930583H14Rik	0	M0039	0.112568
Chek2	Zfp454	0	M0039	0.0642577
Chek2	Vax1	0	M0039	0.0808183
Chek2	Hyal4	0	M0039	0.0206206
Chek2	Ephb4	0	M0039	0.081876
Chek2	Olfr281	0	M0039	0.0916608
Chek2	Cacna1b	0	M0039	0.0351853
Chek2	Pilra	0	M0039	0.12903
Chek2	Tcp10a	0	M0039	0.0714075
Chek2	Gap43	0	M0039	0.102829
Chek2	Mid2	0	M0039	0.0917934
Chek2	Casc1	0	M0039	0.0501238
Chek2	Aqp9	0	M0039	0.0989074
Chek2	Omt2a	0	M0039	0.0825885
Chek2	Arhgap24	0	M0039	0.0453177
Chek2	Cacna1a	0	M0039	0.0459947
Chek2	Zp1	0	M0039	0.074646
Chek2	Sva	0	M0039	0.0947252
Chek2	Olfr923	0	M0039	0.0678792
Chek2	Ctps2	0	M0039	0.0716092
Chek2	Lyzl1	0	M0039	0.0419557
Chek2	Dsc1	0	M0039	0.0916929
Chek2	Clca4	0	M0039	0.131815
Chek2	Tead4	0	M0039	0.0355843
Chek2	Olfr463	0	M0039	0.0898328
Chek2	Insl5	0	M0039	0.0402219
Chek2	2010003O02Rik	0	M0039	0.12778
Chek2	Samd8	0	M0039	0.0400762
9230104L09Rik	Ifi202b	0	M0039	0.0510733
9230104L09Rik	Pcdhb15	0	M0039	0.0283095
9230104L09Rik	Kcnh8	0	M0039	0.106131
9230104L09Rik	4930578C19Rik	0	M0039	0.0652481
9230104L09Rik	Map3k2	0	M0039	0.0835701
9230104L09Rik	Akr1c6	0	M0039	0.0551528
9230104L09Rik	Olfr716	0	M0039	0.00756024
9230104L09Rik	Gga1	0	M0039	0.0408008
9230104L09Rik	Rasgrp4	0	M0039	0.0369219
9230104L09Rik	Sim1	0	M0039	0.0101052
9230104L09Rik	Olfr1298	0	M0039	0.0339969
9230104L09Rik	Stard8	0	M0039	0.0125888
9230104L09Rik	Fbxo16	0	M0039	0.0255295
9230104L09Rik	2810474O19Rik	0	M0039	0.0115076
9230104L09Rik	Osm	0	M0039	0.00663177
9230104L09Rik	Upp1	0	M0039	0.00940222
9230104L09Rik	Cyp11a1	0	M0039	0.0584123
9230104L09Rik	Olfr878	0	M0039	0.0690149
9230104L09Rik	Mfi2	0	M0039	0.0200136
9230104L09Rik	Ifit1	0	M0039	0.0128533
9230104L09Rik	Krtap16-5	0	M0039	0.0359577
9230104L09Rik	Ifit3	0	M0039	0.00835116
9230104L09Rik	Olfr420	0	M0039	0.0284926
9230104L09Rik	Galnt3	0	M0039	0.0446706
9230104L09Rik	4933424G06Rik	0	M0039	0.0461646
9230104L09Rik	Mepe	0	M0039	0.0604006
9230104L09Rik	Npy	0	M0039	0.0109189
9230104L09Rik	Tcf21	0	M0039	0.0276516
9230104L09Rik	Tnfsf4	0	M0039	0.0293563
9230104L09Rik	Socs3	0	M0039	0.0127881
9230104L09Rik	Cyp19a1	0	M0039	0.0207475
9230104L09Rik	Olfr2	0	M0039	0.0153466
9230104L09Rik	Crb1	0	M0039	0.0264364
9230104L09Rik	Fabp1	0	M0039	0.0098664
9230104L09Rik	Sult1e1	0	M0039	0.0033357
9230104L09Rik	Nkg7	0	M0039	0.0922804
9230104L09Rik	Snca	0	M0039	0.00428857
9230104L09Rik	Rab25	0	M0039	0.0167184
9230104L09Rik	Abcg8	0	M0039	0.0688581
9230104L09Rik	Slc26a3	0	M0039	0.00314085
9230104L09Rik	Lair1	0	M0039	0.0297397
9230104L09Rik	4930485B16Rik	0	M0039	0.0366158
9230104L09Rik	Cyp2b9	0	M0039	0.0702489
9230104L09Rik	Olfr1501	0	M0039	0.0348788
9230104L09Rik	4930470P17Rik	0	M0039	0.00629826
9230104L09Rik	Jarid2	0	M0039	0.0532076
9230104L09Rik	Olfr1477	0	M0039	0.0404969
9230104L09Rik	D14Ertd668e	0	M0039	0.0431345
9230104L09Rik	Dclre1c	0	M0039	0.0584341
9230104L09Rik	Ms4a1	0	M0039	0.0351576
9230104L09Rik	Slamf1	0	M0039	0.00431065
9230104L09Rik	Klrb1c	0	M0039	0.0528201
9230104L09Rik	Napb	0	M0039	0.0129169
9230104L09Rik	Plg	0	M0039	0.0390207
9230104L09Rik	Dner	0	M0039	0.0214946
9230104L09Rik	Epb4.2	0	M0039	0.0347954
9230104L09Rik	Gypa	0	M0039	0.0153802
9230104L09Rik	Btk	0	M0039	0.0142554
9230104L09Rik	Olfr430	0	M0039	0.0256298
9230104L09Rik	Ephb1	0	M0039	0.0130215
9230104L09Rik	Adamts7	0	M0039	0.0476005
9230104L09Rik	Nrxn3	0	M0039	0.0262763
9230104L09Rik	Hs6st3	0	M0039	0.00466871
9230104L09Rik	Gfra2	0	M0039	0.0608805
9230104L09Rik	2010106E10Rik	0	M0039	0.0350503
9230104L09Rik	Olfr645	0	M0039	0.0287237
9230104L09Rik	Insm1	0	M0039	0.0168326
9230104L09Rik	Gfra3	0	M0039	0.0556656
9230104L09Rik	Tox	0	M0039	0.0171385
9230104L09Rik	Olfr803	0	M0039	0.0409919
9230104L09Rik	Ptger1	0	M0039	0.00945077
9230104L09Rik	Olfr686	0	M0039	0.110902
9230104L09Rik	Il6	0	M0039	0.040358
9230104L09Rik	Oas1a	0	M0039	0.0145336
9230104L09Rik	Prps1	0	M0039	0.0141238
9230104L09Rik	Bspry	0	M0039	0.0157471
9230104L09Rik	Pla2g2f	0	M0039	0.0139553
9230104L09Rik	1700007B14Rik	0	M0039	0.00316188
9230104L09Rik	Stk32a	0	M0039	0.0512
9230104L09Rik	Olfr1272	0	M0039	0.0343876
9230104L09Rik	Grin1	0	M0039	0.0514722
9230104L09Rik	Erdr1	0	M0039	0.0171588
9230104L09Rik	Cyp2b10	0	M0039	0.0304791
9230104L09Rik	4930583H14Rik	0	M0039	0.0803051
9230104L09Rik	Zfp454	0	M0039	0.0123184
9230104L09Rik	Vax1	0	M0039	0.0430029
9230104L09Rik	Hyal4	0	M0039	0.00634406
9230104L09Rik	Ephb4	0	M0039	0.0468973
9230104L09Rik	Olfr281	0	M0039	0.0448196
9230104L09Rik	Cacna1b	0	M0039	0.0215499
9230104L09Rik	Pilra	0	M0039	0.121879
9230104L09Rik	Tcp10a	0	M0039	0.0128933
9230104L09Rik	Gap43	0	M0039	0.0791623
9230104L09Rik	Mid2	0	M0039	0.0229526
9230104L09Rik	Casc1	0	M0039	0.0130618
9230104L09Rik	Aqp9	0	M0039	0.0355614
9230104L09Rik	Omt2a	0	M0039	0.00954443
9230104L09Rik	Arhgap24	0	M0039	0.0161579
9230104L09Rik	Cacna1a	0	M0039	0.0255615
9230104L09Rik	Zp1	0	M0039	0.0302242
9230104L09Rik	Sva	0	M0039	0.0416263
9230104L09Rik	Olfr923	0	M0039	0.0462148
9230104L09Rik	Ctps2	0	M0039	0.0169731
9230104L09Rik	Lyzl1	0	M0039	0.0118471
9230104L09Rik	Dsc1	0	M0039	0.045377
9230104L09Rik	Clca4	0	M0039	0.0420596
9230104L09Rik	Tead4	0	M0039	0.013133
9230104L09Rik	Olfr463	0	M0039	0.0252882
9230104L09Rik	Insl5	0	M0039	0.0318255
9230104L09Rik	2010003O02Rik	0	M0039	0.0942122
9230104L09Rik	Samd8	0	M0039	0.0330413
Ifi202b	Pcdhb15	0	M0039	0.0108861
Ifi202b	Kcnh8	0	M0039	0.0751346
Ifi202b	4930578C19Rik	0	M0039	0.0704054
Ifi202b	Map3k2	0	M0039	0.0333404
Ifi202b	Akr1c6	0	M0039	0.0317604
Ifi202b	Olfr716	0	M0039	0.0138996
Ifi202b	Gga1	0	M0039	0.0798266
Ifi202b	Rasgrp4	0	M0039	0.00331068
Ifi202b	Sim1	0	M0039	0.0237861
Ifi202b	Olfr1298	0	M0039	0.028914
Ifi202b	Stard8	0	M0039	0.0494694
Ifi202b	Fbxo16	0	M0039	0.0367921
Ifi202b	2810474O19Rik	0	M0039	0.0377823
Ifi202b	Osm	0	M0039	0.0153872
Ifi202b	Upp1	0	M0039	0.0344117
Ifi202b	Cyp11a1	0	M0039	0.0415833
Ifi202b	Olfr878	0	M0039	0.0433868
Ifi202b	Mfi2	0	M0039	0.0390081
Ifi202b	Ifit1	0	M0039	0.0557556
Ifi202b	Krtap16-5	0	M0039	0.0471151
Ifi202b	Ifit3	0	M0039	0.0341103
Ifi202b	Olfr420	0	M0039	0.05584
Ifi202b	Galnt3	0	M0039	0.0206867
Ifi202b	4933424G06Rik	0	M0039	0.0365358
Ifi202b	Mepe	0	M0039	0.115422
Ifi202b	Npy	0	M0039	0.00752625
Ifi202b	Tcf21	0	M0039	0.0232883
Ifi202b	Tnfsf4	0	M0039	0.0382014
Ifi202b	Socs3	0	M0039	0.029489
Ifi202b	Cyp19a1	0	M0039	0.0419344
Ifi202b	Olfr2	0	M0039	0.0323555
Ifi202b	Crb1	0	M0039	0.0326877
Ifi202b	Fabp1	0	M0039	0.0154135
Ifi202b	Sult1e1	0	M0039	0.00368772
Ifi202b	Nkg7	0	M0039	0.0233837
Ifi202b	Snca	0	M0039	0.0175979
Ifi202b	Rab25	0	M0039	0.0187681
Ifi202b	Abcg8	0	M0039	0.133169
Ifi202b	Slc26a3	0	M0039	0.0103392
Ifi202b	Lair1	0	M0039	0.0404956
Ifi202b	4930485B16Rik	0	M0039	0.0324941
Ifi202b	Cyp2b9	0	M0039	0.0113914
Ifi202b	Olfr1501	0	M0039	0.00954297
Ifi202b	4930470P17Rik	0	M0039	0.0173945
Ifi202b	Jarid2	0	M0039	0.0509066
Ifi202b	Olfr1477	0	M0039	0.0993688
Ifi202b	D14Ertd668e	0	M0039	0.0497985
Ifi202b	Dclre1c	0	M0039	0.0174402
Ifi202b	Ms4a1	0	M0039	0.0142746
Ifi202b	Slamf1	0	M0039	0.0122489
Ifi202b	Klrb1c	0	M0039	0.038457
Ifi202b	Napb	0	M0039	0.0145014
Ifi202b	Plg	0	M0039	0.00973985
Ifi202b	Dner	0	M0039	0.0302799
Ifi202b	Epb4.2	0	M0039	0.0142807
Ifi202b	Gypa	0	M0039	0.0420642
Ifi202b	Btk	0	M0039	0.0422495
Ifi202b	Olfr430	0	M0039	0.0393039
Ifi202b	Ephb1	0	M0039	0.0539762
Ifi202b	Adamts7	0	M0039	0.0871537
Ifi202b	Nrxn3	0	M0039	0.0504008
Ifi202b	Hs6st3	0	M0039	0.0238646
Ifi202b	Gfra2	0	M0039	0.0175412
Ifi202b	2010106E10Rik	0	M0039	0.0148927
Ifi202b	Olfr645	0	M0039	0.0304727
Ifi202b	Insm1	0	M0039	0.0315991
Ifi202b	Gfra3	0	M0039	0.144774
Ifi202b	Tox	0	M0039	0.0232912
Ifi202b	Olfr803	0	M0039	0.126213
Ifi202b	Ptger1	0	M0039	0.046044
Ifi202b	Olfr686	0	M0039	0.0945813
Ifi202b	Il6	0	M0039	0.0434734
Ifi202b	Oas1a	0	M0039	0.0272568
Ifi202b	Prps1	0	M0039	0.0463589
Ifi202b	Bspry	0	M0039	0.0240143
Ifi202b	Pla2g2f	0	M0039	0.0129832
Ifi202b	1700007B14Rik	0	M0039	0.0105698
Ifi202b	Stk32a	0	M0039	0.0572986
Ifi202b	Olfr1272	0	M0039	0.0303477
Ifi202b	Grin1	0	M0039	0.0294349
Ifi202b	Erdr1	0	M0039	0.0676467
Ifi202b	Cyp2b10	0	M0039	0.0087381
Ifi202b	4930583H14Rik	0	M0039	0.0396659
Ifi202b	Zfp454	0	M0039	0.0288737
Ifi202b	Vax1	0	M0039	0.0432475
Ifi202b	Hyal4	0	M0039	0.00447447
Ifi202b	Ephb4	0	M0039	0.0778149
Ifi202b	Olfr281	0	M0039	0.0676319
Ifi202b	Cacna1b	0	M0039	0.0207671
Ifi202b	Pilra	0	M0039	0.0533806
Ifi202b	Tcp10a	0	M0039	0.0527288
Ifi202b	Gap43	0	M0039	0.0297703
Ifi202b	Mid2	0	M0039	0.0849409
Ifi202b	Casc1	0	M0039	0.0601553
Ifi202b	Aqp9	0	M0039	0.0344873
Ifi202b	Omt2a	0	M0039	0.0409283
Ifi202b	Arhgap24	0	M0039	0.0299951
Ifi202b	Cacna1a	0	M0039	0.0320914
Ifi202b	Zp1	0	M0039	0.051196
Ifi202b	Sva	0	M0039	0.0700718
Ifi202b	Olfr923	0	M0039	0.0365179
Ifi202b	Ctps2	0	M0039	0.0281203
Ifi202b	Lyzl1	0	M0039	0.0180243
Ifi202b	Dsc1	0	M0039	0.0390582
Ifi202b	Clca4	0	M0039	0.117537
Ifi202b	Tead4	0	M0039	0.0135521
Ifi202b	Olfr463	0	M0039	0.0458898
Ifi202b	Insl5	0	M0039	0.0172754
Ifi202b	2010003O02Rik	0	M0039	0.0791924
Ifi202b	Samd8	0	M0039	0.0677116
Pcdhb15	Kcnh8	0	M0039	0.0367375
Pcdhb15	4930578C19Rik	0	M0039	0.028567
Pcdhb15	Map3k2	0	M0039	0.0488739
Pcdhb15	Akr1c6	0	M0039	0.0688601
Pcdhb15	Olfr716	0	M0039	0.0244449
Pcdhb15	Gga1	0	M0039	0.0327433
Pcdhb15	Rasgrp4	0	M0039	0.092057
Pcdhb15	Sim1	0	M0039	0.0480514
Pcdhb15	Olfr1298	0	M0039	0.052563
Pcdhb15	Stard8	0	M0039	0.026951
Pcdhb15	Fbxo16	0	M0039	0.0162054
Pcdhb15	2810474O19Rik	0	M0039	0.0256271
Pcdhb15	Osm	0	M0039	0.0579871
Pcdhb15	Upp1	0	M0039	0.0155279
Pcdhb15	Cyp11a1	0	M0039	0.0511731
Pcdhb15	Olfr878	0	M0039	0.0166682
Pcdhb15	Mfi2	0	M0039	0.00684294
Pcdhb15	Ifit1	0	M0039	0.0284486
Pcdhb15	Krtap16-5	0	M0039	0.0600865
Pcdhb15	Ifit3	0	M0039	0.0253292
Pcdhb15	Olfr420	0	M0039	0.044669
Pcdhb15	Galnt3	0	M0039	0.0231522
Pcdhb15	4933424G06Rik	0	M0039	0.0246509
Pcdhb15	Mepe	0	M0039	0.0195183
Pcdhb15	Npy	0	M0039	0.0741079
Pcdhb15	Tcf21	0	M0039	0.0421691
Pcdhb15	Tnfsf4	0	M0039	0.0125943
Pcdhb15	Socs3	0	M0039	0.018945
Pcdhb15	Cyp19a1	0	M0039	0.0257136
Pcdhb15	Olfr2	0	M0039	0.0146978
Pcdhb15	Crb1	0	M0039	0.00741854
Pcdhb15	Fabp1	0	M0039	0.0217947
Pcdhb15	Sult1e1	0	M0039	0.026957
Pcdhb15	Nkg7	0	M0039	0.0766099
Pcdhb15	Snca	0	M0039	0.0210908
Pcdhb15	Rab25	0	M0039	0.0504479
Pcdhb15	Abcg8	0	M0039	0.0212074
Pcdhb15	Slc26a3	0	M0039	0.0125717
Pcdhb15	Lair1	0	M0039	0.0283564
Pcdhb15	4930485B16Rik	0	M0039	0.020833
Pcdhb15	Cyp2b9	0	M0039	0.110523
Pcdhb15	Olfr1501	0	M0039	0.0693393
Pcdhb15	4930470P17Rik	0	M0039	0.0382093
Pcdhb15	Jarid2	0	M0039	0.0379883
Pcdhb15	Olfr1477	0	M0039	0.0159516
Pcdhb15	D14Ertd668e	0	M0039	0.054567
Pcdhb15	Dclre1c	0	M0039	0.0936217
Pcdhb15	Ms4a1	0	M0039	0.032381
Pcdhb15	Slamf1	0	M0039	0.0224755
Pcdhb15	Klrb1c	0	M0039	0.018834
Pcdhb15	Napb	0	M0039	0.0149682
Pcdhb15	Plg	0	M0039	0.11689
Pcdhb15	Dner	0	M0039	0.0384666
Pcdhb15	Epb4.2	0	M0039	0.0316847
Pcdhb15	Gypa	0	M0039	0.0361813
Pcdhb15	Btk	0	M0039	0.0362981
Pcdhb15	Olfr430	0	M0039	0.0295372
Pcdhb15	Ephb1	0	M0039	0.0214513
Pcdhb15	Adamts7	0	M0039	0.0204943
Pcdhb15	Nrxn3	0	M0039	0.0480037
Pcdhb15	Hs6st3	0	M0039	0.0559509
Pcdhb15	Gfra2	0	M0039	0.0452822
Pcdhb15	2010106E10Rik	0	M0039	0.0362898
Pcdhb15	Olfr645	0	M0039	0.0688849
Pcdhb15	Insm1	0	M0039	0.00781537
Pcdhb15	Gfra3	0	M0039	0.0126695
Pcdhb15	Tox	0	M0039	0.0290251
Pcdhb15	Olfr803	0	M0039	0.0198707
Pcdhb15	Ptger1	0	M0039	0.0214565
Pcdhb15	Olfr686	0	M0039	0.0339051
Pcdhb15	Il6	0	M0039	0.0104045
Pcdhb15	Oas1a	0	M0039	0.0552342
Pcdhb15	Prps1	0	M0039	0.0207202
Pcdhb15	Bspry	0	M0039	0.121965
Pcdhb15	Pla2g2f	0	M0039	0.0155513
Pcdhb15	1700007B14Rik	0	M0039	0.0159192
Pcdhb15	Stk32a	0	M0039	0.0354325
Pcdhb15	Olfr1272	0	M0039	0.0478115
Pcdhb15	Grin1	0	M0039	0.0455309
Pcdhb15	Erdr1	0	M0039	0.0122363
Pcdhb15	Cyp2b10	0	M0039	0.0974492
Pcdhb15	4930583H14Rik	0	M0039	0.0225929
Pcdhb15	Zfp454	0	M0039	0.0365368
Pcdhb15	Vax1	0	M0039	0.06641
Pcdhb15	Hyal4	0	M0039	0.0828561
Pcdhb15	Ephb4	0	M0039	0.0297194
Pcdhb15	Olfr281	0	M0039	0.0159593
Pcdhb15	Cacna1b	0	M0039	0.0246674
Pcdhb15	Pilra	0	M0039	0.0209743
Pcdhb15	Tcp10a	0	M0039	0.0127149
Pcdhb15	Gap43	0	M0039	0.0474578
Pcdhb15	Mid2	0	M0039	0.0316249
Pcdhb15	Casc1	0	M0039	0.017441
Pcdhb15	Aqp9	0	M0039	0.0255796
Pcdhb15	Omt2a	0	M0039	0.0176039
Pcdhb15	Arhgap24	0	M0039	0.0116252
Pcdhb15	Cacna1a	0	M0039	0.0210561
Pcdhb15	Zp1	0	M0039	0.0895999
Pcdhb15	Sva	0	M0039	0.0101114
Pcdhb15	Olfr923	0	M0039	0.0334777
Pcdhb15	Ctps2	0	M0039	0.0387418
Pcdhb15	Lyzl1	0	M0039	0.0785694
Pcdhb15	Dsc1	0	M0039	0.069349
Pcdhb15	Clca4	0	M0039	0.0634829
Pcdhb15	Tead4	0	M0039	0.0129438
Pcdhb15	Olfr463	0	M0039	0.0266489
Pcdhb15	Insl5	0	M0039	0.100147
Pcdhb15	2010003O02Rik	0	M0039	0.0724908
Pcdhb15	Samd8	0	M0039	0.0308458
Kcnh8	4930578C19Rik	0	M0039	0.10061
Kcnh8	Map3k2	0	M0039	0.0829077
Kcnh8	Akr1c6	0	M0039	0.0695066
Kcnh8	Olfr716	0	M0039	0.0438902
Kcnh8	Gga1	0	M0039	0.0628286
Kcnh8	Rasgrp4	0	M0039	0.024503
Kcnh8	Sim1	0	M0039	0.053914
Kcnh8	Olfr1298	0	M0039	0.0919274
Kcnh8	Stard8	0	M0039	0.050913
Kcnh8	Fbxo16	0	M0039	0.066244
Kcnh8	2810474O19Rik	0	M0039	0.0495819
Kcnh8	Osm	0	M0039	0.0226964
Kcnh8	Upp1	0	M0039	0.0378957
Kcnh8	Cyp11a1	0	M0039	0.0935891
Kcnh8	Olfr878	0	M0039	0.096134
Kcnh8	Mfi2	0	M0039	0.04318
Kcnh8	Ifit1	0	M0039	0.0557122
Kcnh8	Krtap16-5	0	M0039	0.105964
Kcnh8	Ifit3	0	M0039	0.0421849
Kcnh8	Olfr420	0	M0039	0.0479755
Kcnh8	Galnt3	0	M0039	0.0988202
Kcnh8	4933424G06Rik	0	M0039	0.0606611
Kcnh8	Mepe	0	M0039	0.0369366
Kcnh8	Npy	0	M0039	0.0448308
Kcnh8	Tcf21	0	M0039	0.0865235
Kcnh8	Tnfsf4	0	M0039	0.0763116
Kcnh8	Socs3	0	M0039	0.042405
Kcnh8	Cyp19a1	0	M0039	0.0430282
Kcnh8	Olfr2	0	M0039	0.0454668
Kcnh8	Crb1	0	M0039	0.0469259
Kcnh8	Fabp1	0	M0039	0.039945
Kcnh8	Sult1e1	0	M0039	0.0125244
Kcnh8	Nkg7	0	M0039	0.0784162
Kcnh8	Snca	0	M0039	0.0112445
Kcnh8	Rab25	0	M0039	0.0513669
Kcnh8	Abcg8	0	M0039	0.102987
Kcnh8	Slc26a3	0	M0039	0.010496
Kcnh8	Lair1	0	M0039	0.0807112
Kcnh8	4930485B16Rik	0	M0039	0.0602748
Kcnh8	Cyp2b9	0	M0039	0.0547623
Kcnh8	Olfr1501	0	M0039	0.0725493
Kcnh8	4930470P17Rik	0	M0039	0.0555737
Kcnh8	Jarid2	0	M0039	0.0764725
Kcnh8	Olfr1477	0	M0039	0.0379962
Kcnh8	D14Ertd668e	0	M0039	0.124937
Kcnh8	Dclre1c	0	M0039	0.0329336
Kcnh8	Ms4a1	0	M0039	0.0332433
Kcnh8	Slamf1	0	M0039	0.0259747
Kcnh8	Klrb1c	0	M0039	0.0763609
Kcnh8	Napb	0	M0039	0.0306449
Kcnh8	Plg	0	M0039	0.0629502
Kcnh8	Dner	0	M0039	0.106829
Kcnh8	Epb4.2	0	M0039	0.0577165
Kcnh8	Gypa	0	M0039	0.0310322
Kcnh8	Btk	0	M0039	0.0558805
Kcnh8	Olfr430	0	M0039	0.0487454
Kcnh8	Ephb1	0	M0039	0.0721178
Kcnh8	Adamts7	0	M0039	0.0835272
Kcnh8	Nrxn3	0	M0039	0.057153
Kcnh8	Hs6st3	0	M0039	0.0356741
Kcnh8	Gfra2	0	M0039	0.0422592
Kcnh8	2010106E10Rik	0	M0039	0.0528744
Kcnh8	Olfr645	0	M0039	0.0343716
Kcnh8	Insm1	0	M0039	0.056165
Kcnh8	Gfra3	0	M0039	0.102259
Kcnh8	Tox	0	M0039	0.0259803
Kcnh8	Olfr803	0	M0039	0.0771908
Kcnh8	Ptger1	0	M0039	0.0275984
Kcnh8	Olfr686	0	M0039	0.10097
Kcnh8	Il6	0	M0039	0.0837084
Kcnh8	Oas1a	0	M0039	0.0278408
Kcnh8	Prps1	0	M0039	0.0576381
Kcnh8	Bspry	0	M0039	0.0646679
Kcnh8	Pla2g2f	0	M0039	0.0333531
Kcnh8	1700007B14Rik	0	M0039	0.0176898
Kcnh8	Stk32a	0	M0039	0.0905328
Kcnh8	Olfr1272	0	M0039	0.0367018
Kcnh8	Grin1	0	M0039	0.114147
Kcnh8	Erdr1	0	M0039	0.0469418
Kcnh8	Cyp2b10	0	M0039	0.0706039
Kcnh8	4930583H14Rik	0	M0039	0.123942
Kcnh8	Zfp454	0	M0039	0.0832167
Kcnh8	Vax1	0	M0039	0.0735419
Kcnh8	Hyal4	0	M0039	0.0212517
Kcnh8	Ephb4	0	M0039	0.0990931
Kcnh8	Olfr281	0	M0039	0.0854618
Kcnh8	Cacna1b	0	M0039	0.0281083
Kcnh8	Pilra	0	M0039	0.135941
Kcnh8	Tcp10a	0	M0039	0.049562
Kcnh8	Gap43	0	M0039	0.144075
Kcnh8	Mid2	0	M0039	0.0783097
Kcnh8	Casc1	0	M0039	0.0493346
Kcnh8	Aqp9	0	M0039	0.100438
Kcnh8	Omt2a	0	M0039	0.058381
Kcnh8	Arhgap24	0	M0039	0.0252672
Kcnh8	Cacna1a	0	M0039	0.058329
Kcnh8	Zp1	0	M0039	0.0937341
Kcnh8	Sva	0	M0039	0.110042
Kcnh8	Olfr923	0	M0039	0.0547339
Kcnh8	Ctps2	0	M0039	0.0683292
Kcnh8	Lyzl1	0	M0039	0.0474336
Kcnh8	Dsc1	0	M0039	0.0722258
Kcnh8	Clca4	0	M0039	0.121597
Kcnh8	Tead4	0	M0039	0.0317522
Kcnh8	Olfr463	0	M0039	0.075265
Kcnh8	Insl5	0	M0039	0.0531849
Kcnh8	2010003O02Rik	0	M0039	0.12093
Kcnh8	Samd8	0	M0039	0.0351947
4930578C19Rik	Map3k2	0	M0039	0.0859593
4930578C19Rik	Akr1c6	0	M0039	0.0523663
4930578C19Rik	Olfr716	0	M0039	0.0320319
4930578C19Rik	Gga1	0	M0039	0.034731
4930578C19Rik	Rasgrp4	0	M0039	0.017428
4930578C19Rik	Sim1	0	M0039	0.0494918
4930578C19Rik	Olfr1298	0	M0039	0.127867
4930578C19Rik	Stard8	0	M0039	0.0746638
4930578C19Rik	Fbxo16	0	M0039	0.0791141
4930578C19Rik	2810474O19Rik	0	M0039	0.0786692
4930578C19Rik	Osm	0	M0039	0.0303161
4930578C19Rik	Upp1	0	M0039	0.0542542
4930578C19Rik	Cyp11a1	0	M0039	0.112184
4930578C19Rik	Olfr878	0	M0039	0.145145
4930578C19Rik	Mfi2	0	M0039	0.049165
4930578C19Rik	Ifit1	0	M0039	0.0568996
4930578C19Rik	Krtap16-5	0	M0039	0.110392
4930578C19Rik	Ifit3	0	M0039	0.0582171
4930578C19Rik	Olfr420	0	M0039	0.0406524
4930578C19Rik	Galnt3	0	M0039	0.0552565
4930578C19Rik	4933424G06Rik	0	M0039	0.0822473
4930578C19Rik	Mepe	0	M0039	0.0508021
4930578C19Rik	Npy	0	M0039	0.0369576
4930578C19Rik	Tcf21	0	M0039	0.0394276
4930578C19Rik	Tnfsf4	0	M0039	0.0381156
4930578C19Rik	Socs3	0	M0039	0.0487599
4930578C19Rik	Cyp19a1	0	M0039	0.0598694
4930578C19Rik	Olfr2	0	M0039	0.0432887
4930578C19Rik	Crb1	0	M0039	0.0593975
4930578C19Rik	Fabp1	0	M0039	0.0305407
4930578C19Rik	Sult1e1	0	M0039	0.0141542
4930578C19Rik	Nkg7	0	M0039	0.0790711
4930578C19Rik	Snca	0	M0039	0.0233214
4930578C19Rik	Rab25	0	M0039	0.0638465
4930578C19Rik	Abcg8	0	M0039	0.0821529
4930578C19Rik	Slc26a3	0	M0039	0.0112887
4930578C19Rik	Lair1	0	M0039	0.0613209
4930578C19Rik	4930485B16Rik	0	M0039	0.0549455
4930578C19Rik	Cyp2b9	0	M0039	0.0269813
4930578C19Rik	Olfr1501	0	M0039	0.0385832
4930578C19Rik	4930470P17Rik	0	M0039	0.0378607
4930578C19Rik	Jarid2	0	M0039	0.0898149
4930578C19Rik	Olfr1477	0	M0039	0.0362629
4930578C19Rik	D14Ertd668e	0	M0039	0.101063
4930578C19Rik	Dclre1c	0	M0039	0.0258174
4930578C19Rik	Ms4a1	0	M0039	0.0625468
4930578C19Rik	Slamf1	0	M0039	0.0377035
4930578C19Rik	Klrb1c	0	M0039	0.11547
4930578C19Rik	Napb	0	M0039	0.0405832
4930578C19Rik	Plg	0	M0039	0.0505324
4930578C19Rik	Dner	0	M0039	0.0826973
4930578C19Rik	Epb4.2	0	M0039	0.0426129
4930578C19Rik	Gypa	0	M0039	0.0304918
4930578C19Rik	Btk	0	M0039	0.0540954
4930578C19Rik	Olfr430	0	M0039	0.0591687
4930578C19Rik	Ephb1	0	M0039	0.0860717
4930578C19Rik	Adamts7	0	M0039	0.090613
4930578C19Rik	Nrxn3	0	M0039	0.0580655
4930578C19Rik	Hs6st3	0	M0039	0.0338883
4930578C19Rik	Gfra2	0	M0039	0.0642007
4930578C19Rik	2010106E10Rik	0	M0039	0.0910311
4930578C19Rik	Olfr645	0	M0039	0.0257351
4930578C19Rik	Insm1	0	M0039	0.0441591
4930578C19Rik	Gfra3	0	M0039	0.0818497
4930578C19Rik	Tox	0	M0039	0.00723337
4930578C19Rik	Olfr803	0	M0039	0.068407
4930578C19Rik	Ptger1	0	M0039	0.0430041
4930578C19Rik	Olfr686	0	M0039	0.0924573
4930578C19Rik	Il6	0	M0039	0.0825271
4930578C19Rik	Oas1a	0	M0039	0.0389889
4930578C19Rik	Prps1	0	M0039	0.0296294
4930578C19Rik	Bspry	0	M0039	0.0727399
4930578C19Rik	Pla2g2f	0	M0039	0.0296959
4930578C19Rik	1700007B14Rik	0	M0039	0.0143984
4930578C19Rik	Stk32a	0	M0039	0.0409293
4930578C19Rik	Olfr1272	0	M0039	0.0523
4930578C19Rik	Grin1	0	M0039	0.138392
4930578C19Rik	Erdr1	0	M0039	0.01869
4930578C19Rik	Cyp2b10	0	M0039	0.028841
4930578C19Rik	4930583H14Rik	0	M0039	0.0984003
4930578C19Rik	Zfp454	0	M0039	0.0662139
4930578C19Rik	Vax1	0	M0039	0.0654749
4930578C19Rik	Hyal4	0	M0039	0.0333705
4930578C19Rik	Ephb4	0	M0039	0.0455044
4930578C19Rik	Olfr281	0	M0039	0.14919
4930578C19Rik	Cacna1b	0	M0039	0.0387029
4930578C19Rik	Pilra	0	M0039	0.0966828
4930578C19Rik	Tcp10a	0	M0039	0.0810045
4930578C19Rik	Gap43	0	M0039	0.0963701
4930578C19Rik	Mid2	0	M0039	0.116672
4930578C19Rik	Casc1	0	M0039	0.0272238
4930578C19Rik	Aqp9	0	M0039	0.0861326
4930578C19Rik	Omt2a	0	M0039	0.0493604
4930578C19Rik	Arhgap24	0	M0039	0.0597198
4930578C19Rik	Cacna1a	0	M0039	0.0652187
4930578C19Rik	Zp1	0	M0039	0.070822
4930578C19Rik	Sva	0	M0039	0.0886131
4930578C19Rik	Olfr923	0	M0039	0.0485323
4930578C19Rik	Ctps2	0	M0039	0.0500857
4930578C19Rik	Lyzl1	0	M0039	0.032754
4930578C19Rik	Dsc1	0	M0039	0.0747941
4930578C19Rik	Clca4	0	M0039	0.151282
4930578C19Rik	Tead4	0	M0039	0.0425391
4930578C19Rik	Olfr463	0	M0039	0.0721499
4930578C19Rik	Insl5	0	M0039	0.0734347
4930578C19Rik	2010003O02Rik	0	M0039	0.116292
4930578C19Rik	Samd8	0	M0039	0.0192384
Map3k2	Akr1c6	0	M0039	0.0594128
Map3k2	Olfr716	0	M0039	0.018515
Map3k2	Gga1	0	M0039	0.0707684
Map3k2	Rasgrp4	0	M0039	0.0567574
Map3k2	Sim1	0	M0039	0.0264805
Map3k2	Olfr1298	0	M0039	0.11042
Map3k2	Stard8	0	M0039	0.0459112
Map3k2	Fbxo16	0	M0039	0.044045
Map3k2	2810474O19Rik	0	M0039	0.0353483
Map3k2	Osm	0	M0039	0.0246827
Map3k2	Upp1	0	M0039	0.0301741
Map3k2	Cyp11a1	0	M0039	0.132235
Map3k2	Olfr878	0	M0039	0.123944
Map3k2	Mfi2	0	M0039	0.0270579
Map3k2	Ifit1	0	M0039	0.0277004
Map3k2	Krtap16-5	0	M0039	0.0716229
Map3k2	Ifit3	0	M0039	0.0299913
Map3k2	Olfr420	0	M0039	0.0262667
Map3k2	Galnt3	0	M0039	0.0308596
Map3k2	4933424G06Rik	0	M0039	0.0718899
Map3k2	Mepe	0	M0039	0.0248349
Map3k2	Npy	0	M0039	0.0314917
Map3k2	Tcf21	0	M0039	0.0521631
Map3k2	Tnfsf4	0	M0039	0.036836
Map3k2	Socs3	0	M0039	0.027574
Map3k2	Cyp19a1	0	M0039	0.025465
Map3k2	Olfr2	0	M0039	0.0262218
Map3k2	Crb1	0	M0039	0.0334848
Map3k2	Fabp1	0	M0039	0.0112167
Map3k2	Sult1e1	0	M0039	0.00944646
Map3k2	Nkg7	0	M0039	0.144233
Map3k2	Snca	0	M0039	0.0152435
Map3k2	Rab25	0	M0039	0.079746
Map3k2	Abcg8	0	M0039	0.047973
Map3k2	Slc26a3	0	M0039	0.00318699
Map3k2	Lair1	0	M0039	0.0258012
Map3k2	4930485B16Rik	0	M0039	0.0467535
Map3k2	Cyp2b9	0	M0039	0.0712389
Map3k2	Olfr1501	0	M0039	0.036225
Map3k2	4930470P17Rik	0	M0039	0.0219403
Map3k2	Jarid2	0	M0039	0.106174
Map3k2	Olfr1477	0	M0039	0.0148459
Map3k2	D14Ertd668e	0	M0039	0.0862901
Map3k2	Dclre1c	0	M0039	0.0452208
Map3k2	Ms4a1	0	M0039	0.0800792
Map3k2	Slamf1	0	M0039	0.020072
Map3k2	Klrb1c	0	M0039	0.0950868
Map3k2	Napb	0	M0039	0.0347723
Map3k2	Plg	0	M0039	0.120779
Map3k2	Dner	0	M0039	0.0496955
Map3k2	Epb4.2	0	M0039	0.027194
Map3k2	Gypa	0	M0039	0.0535619
Map3k2	Btk	0	M0039	0.0585972
Map3k2	Olfr430	0	M0039	0.0453542
Map3k2	Ephb1	0	M0039	0.0290247
Map3k2	Adamts7	0	M0039	0.0547694
Map3k2	Nrxn3	0	M0039	0.0313858
Map3k2	Hs6st3	0	M0039	0.0240308
Map3k2	Gfra2	0	M0039	0.0744398
Map3k2	2010106E10Rik	0	M0039	0.107145
Map3k2	Olfr645	0	M0039	0.0202599
Map3k2	Insm1	0	M0039	0.027915
Map3k2	Gfra3	0	M0039	0.0390949
Map3k2	Tox	0	M0039	0.00854093
Map3k2	Olfr803	0	M0039	0.0343909
Map3k2	Ptger1	0	M0039	0.0378463
Map3k2	Olfr686	0	M0039	0.0667869
Map3k2	Il6	0	M0039	0.0640809
Map3k2	Oas1a	0	M0039	0.0256856
Map3k2	Prps1	0	M0039	0.0372435
Map3k2	Bspry	0	M0039	0.0478669
Map3k2	Pla2g2f	0	M0039	0.0134647
Map3k2	1700007B14Rik	0	M0039	0.00589528
Map3k2	Stk32a	0	M0039	0.0840252
Map3k2	Olfr1272	0	M0039	0.0409103
Map3k2	Grin1	0	M0039	0.101068
Map3k2	Erdr1	0	M0039	0.0329621
Map3k2	Cyp2b10	0	M0039	0.037672
Map3k2	4930583H14Rik	0	M0039	0.077085
Map3k2	Zfp454	0	M0039	0.0404084
Map3k2	Vax1	0	M0039	0.0517073
Map3k2	Hyal4	0	M0039	0.0321119
Map3k2	Ephb4	0	M0039	0.0495336
Map3k2	Olfr281	0	M0039	0.0782661
Map3k2	Cacna1b	0	M0039	0.0251912
Map3k2	Pilra	0	M0039	0.101046
Map3k2	Tcp10a	0	M0039	0.0447213
Map3k2	Gap43	0	M0039	0.0812492
Map3k2	Mid2	0	M0039	0.0669715
Map3k2	Casc1	0	M0039	0.0473933
Map3k2	Aqp9	0	M0039	0.0553474
Map3k2	Omt2a	0	M0039	0.0342545
Map3k2	Arhgap24	0	M0039	0.0373921
Map3k2	Cacna1a	0	M0039	0.0419753
Map3k2	Zp1	0	M0039	0.0515327
Map3k2	Sva	0	M0039	0.0486064
Map3k2	Olfr923	0	M0039	0.112107
Map3k2	Ctps2	0	M0039	0.0357462
Map3k2	Lyzl1	0	M0039	0.0482212
Map3k2	Dsc1	0	M0039	0.139992
Map3k2	Clca4	0	M0039	0.0883341
Map3k2	Tead4	0	M0039	0.0240192
Map3k2	Olfr463	0	M0039	0.0408566
Map3k2	Insl5	0	M0039	0.0833468
Map3k2	2010003O02Rik	0	M0039	0.0690757
Map3k2	Samd8	0	M0039	0.0423317
Akr1c6	Olfr716	0	M0039	0.0146005
Akr1c6	Gga1	0	M0039	0.06407
Akr1c6	Rasgrp4	0	M0039	0.0534912
Akr1c6	Sim1	0	M0039	0.0227874
Akr1c6	Olfr1298	0	M0039	0.0457313
Akr1c6	Stard8	0	M0039	0.0470394
Akr1c6	Fbxo16	0	M0039	0.0515934
Akr1c6	2810474O19Rik	0	M0039	0.0295116
Akr1c6	Osm	0	M0039	0.0208841
Akr1c6	Upp1	0	M0039	0.00810878
Akr1c6	Cyp11a1	0	M0039	0.0747255
Akr1c6	Olfr878	0	M0039	0.0502402
Akr1c6	Mfi2	0	M0039	0.0288864
Akr1c6	Ifit1	0	M0039	0.0404488
Akr1c6	Krtap16-5	0	M0039	0.075744
Akr1c6	Ifit3	0	M0039	0.0334499
Akr1c6	Olfr420	0	M0039	0.080687
Akr1c6	Galnt3	0	M0039	0.0634789
Akr1c6	4933424G06Rik	0	M0039	0.0215855
Akr1c6	Mepe	0	M0039	0.0133512
Akr1c6	Npy	0	M0039	0.054524
Akr1c6	Tcf21	0	M0039	0.0810541
Akr1c6	Tnfsf4	0	M0039	0.025366
Akr1c6	Socs3	0	M0039	0.0300061
Akr1c6	Cyp19a1	0	M0039	0.0734532
Akr1c6	Olfr2	0	M0039	0.0235291
Akr1c6	Crb1	0	M0039	0.0243893
Akr1c6	Fabp1	0	M0039	0.020649
Akr1c6	Sult1e1	0	M0039	0.0189335
Akr1c6	Nkg7	0	M0039	0.0863881
Akr1c6	Snca	0	M0039	0.0165271
Akr1c6	Rab25	0	M0039	0.0675315
Akr1c6	Abcg8	0	M0039	0.0861844
Akr1c6	Slc26a3	0	M0039	0.00789199
Akr1c6	Lair1	0	M0039	0.0365362
Akr1c6	4930485B16Rik	0	M0039	0.0811879
Akr1c6	Cyp2b9	0	M0039	0.0503927
Akr1c6	Olfr1501	0	M0039	0.0410283
Akr1c6	4930470P17Rik	0	M0039	0.041968
Akr1c6	Jarid2	0	M0039	0.0439401
Akr1c6	Olfr1477	0	M0039	0.0111399
Akr1c6	D14Ertd668e	0	M0039	0.0809302
Akr1c6	Dclre1c	0	M0039	0.111298
Akr1c6	Ms4a1	0	M0039	0.0287757
Akr1c6	Slamf1	0	M0039	0.0243569
Akr1c6	Klrb1c	0	M0039	0.0540541
Akr1c6	Napb	0	M0039	0.0274561
Akr1c6	Plg	0	M0039	0.0570631
Akr1c6	Dner	0	M0039	0.0493996
Akr1c6	Epb4.2	0	M0039	0.0677161
Akr1c6	Gypa	0	M0039	0.0746257
Akr1c6	Btk	0	M0039	0.0332866
Akr1c6	Olfr430	0	M0039	0.0267398
Akr1c6	Ephb1	0	M0039	0.0258186
Akr1c6	Adamts7	0	M0039	0.0971063
Akr1c6	Nrxn3	0	M0039	0.081528
Akr1c6	Hs6st3	0	M0039	0.0217123
Akr1c6	Gfra2	0	M0039	0.032038
Akr1c6	2010106E10Rik	0	M0039	0.0336857
Akr1c6	Olfr645	0	M0039	0.0926038
Akr1c6	Insm1	0	M0039	0.0217935
Akr1c6	Gfra3	0	M0039	0.0309696
Akr1c6	Tox	0	M0039	0.0110678
Akr1c6	Olfr803	0	M0039	0.0971682
Akr1c6	Ptger1	0	M0039	0.0111775
Akr1c6	Olfr686	0	M0039	0.104577
Akr1c6	Il6	0	M0039	0.058392
Akr1c6	Oas1a	0	M0039	0.0418147
Akr1c6	Prps1	0	M0039	0.0409682
Akr1c6	Bspry	0	M0039	0.0391885
Akr1c6	Pla2g2f	0	M0039	0.0247581
Akr1c6	1700007B14Rik	0	M0039	0.0216219
Akr1c6	Stk32a	0	M0039	0.10022
Akr1c6	Olfr1272	0	M0039	0.0722922
Akr1c6	Grin1	0	M0039	0.0471174
Akr1c6	Erdr1	0	M0039	0.0129352
Akr1c6	Cyp2b10	0	M0039	0.0375917
Akr1c6	4930583H14Rik	0	M0039	0.0596916
Akr1c6	Zfp454	0	M0039	0.0360521
Akr1c6	Vax1	0	M0039	0.105077
Akr1c6	Hyal4	0	M0039	0.0411905
Akr1c6	Ephb4	0	M0039	0.082987
Akr1c6	Olfr281	0	M0039	0.0259738
Akr1c6	Cacna1b	0	M0039	0.0226288
Akr1c6	Pilra	0	M0039	0.0589257
Akr1c6	Tcp10a	0	M0039	0.0202653
Akr1c6	Gap43	0	M0039	0.0820014
Akr1c6	Mid2	0	M0039	0.0371547
Akr1c6	Casc1	0	M0039	0.0441332
Akr1c6	Aqp9	0	M0039	0.0615165
Akr1c6	Omt2a	0	M0039	0.0813949
Akr1c6	Arhgap24	0	M0039	0.0321172
Akr1c6	Cacna1a	0	M0039	0.044969
Akr1c6	Zp1	0	M0039	0.0578777
Akr1c6	Sva	0	M0039	0.0478907
Akr1c6	Olfr923	0	M0039	0.0767391
Akr1c6	Ctps2	0	M0039	0.0437687
Akr1c6	Lyzl1	0	M0039	0.0909426
Akr1c6	Dsc1	0	M0039	0.129148
Akr1c6	Clca4	0	M0039	0.0703147
Akr1c6	Tead4	0	M0039	0.0541732
Akr1c6	Olfr463	0	M0039	0.043804
Akr1c6	Insl5	0	M0039	0.036086
Akr1c6	2010003O02Rik	0	M0039	0.0876391
Akr1c6	Samd8	0	M0039	0.0444376
Olfr716	Gga1	0	M0039	0.0124753
Olfr716	Rasgrp4	0	M0039	0.0182279
Olfr716	Sim1	0	M0039	0.0348498
Olfr716	Olfr1298	0	M0039	0.0402167
Olfr716	Stard8	0	M0039	0.0491795
Olfr716	Fbxo16	0	M0039	0.0227783
Olfr716	2810474O19Rik	0	M0039	0.0179264
Olfr716	Osm	0	M0039	0.0508031
Olfr716	Upp1	0	M0039	0.120263
Olfr716	Cyp11a1	0	M0039	0.0381874
Olfr716	Olfr878	0	M0039	0.0146851
Olfr716	Mfi2	0	M0039	0.0393374
Olfr716	Ifit1	0	M0039	0.0181144
Olfr716	Krtap16-5	0	M0039	0.0483602
Olfr716	Ifit3	0	M0039	0.01027
Olfr716	Olfr420	0	M0039	0.00761835
Olfr716	Galnt3	0	M0039	0.0536116
Olfr716	4933424G06Rik	0	M0039	0.0284557
Olfr716	Mepe	0	M0039	0.0137096
Olfr716	Npy	0	M0039	0.0407668
Olfr716	Tcf21	0	M0039	0.0467431
Olfr716	Tnfsf4	0	M0039	0.0225146
Olfr716	Socs3	0	M0039	0.0353336
Olfr716	Cyp19a1	0	M0039	0.031704
Olfr716	Olfr2	0	M0039	0.108732
Olfr716	Crb1	0	M0039	0.0382459
Olfr716	Fabp1	0	M0039	0.0383569
Olfr716	Sult1e1	0	M0039	0.0271528
Olfr716	Nkg7	0	M0039	0.0240323
Olfr716	Snca	0	M0039	0.026645
Olfr716	Rab25	0	M0039	0.0263905
Olfr716	Abcg8	0	M0039	0.0182173
Olfr716	Slc26a3	0	M0039	0.0243789
Olfr716	Lair1	0	M0039	0.0881946
Olfr716	4930485B16Rik	0	M0039	0.0304318
Olfr716	Cyp2b9	0	M0039	0.0139767
Olfr716	Olfr1501	0	M0039	0.0626003
Olfr716	4930470P17Rik	0	M0039	0.082959
Olfr716	Jarid2	0	M0039	0.0560447
Olfr716	Olfr1477	0	M0039	0.0190128
Olfr716	D14Ertd668e	0	M0039	0.063561
Olfr716	Dclre1c	0	M0039	0.0130896
Olfr716	Ms4a1	0	M0039	0.00492922
Olfr716	Slamf1	0	M0039	0.0345693
Olfr716	Klrb1c	0	M0039	0.013017
Olfr716	Napb	0	M0039	0.0624077
Olfr716	Plg	0	M0039	0.0292792
Olfr716	Dner	0	M0039	0.130873
Olfr716	Epb4.2	0	M0039	0.057164
Olfr716	Gypa	0	M0039	0.00562407
Olfr716	Btk	0	M0039	0.128352
Olfr716	Olfr430	0	M0039	0.0485494
Olfr716	Ephb1	0	M0039	0.0948388
Olfr716	Adamts7	0	M0039	0.0189523
Olfr716	Nrxn3	0	M0039	0.0513461
Olfr716	Hs6st3	0	M0039	0.0276049
Olfr716	Gfra2	0	M0039	0.0247096
Olfr716	2010106E10Rik	0	M0039	0.0307452
Olfr716	Olfr645	0	M0039	0.0300119
Olfr716	Insm1	0	M0039	0.0760702
Olfr716	Gfra3	0	M0039	0.058979
Olfr716	Tox	0	M0039	0.0232405
Olfr716	Olfr803	0	M0039	0.00627083
Olfr716	Ptger1	0	M0039	0.0820863
Olfr716	Olfr686	0	M0039	0.0251213
Olfr716	Il6	0	M0039	0.0196121
Olfr716	Oas1a	0	M0039	0.00866364
Olfr716	Prps1	0	M0039	0.0234353
Olfr716	Bspry	0	M0039	0.0472541
Olfr716	Pla2g2f	0	M0039	0.0297071
Olfr716	1700007B14Rik	0	M0039	0.0622337
Olfr716	Stk32a	0	M0039	0.0128098
Olfr716	Olfr1272	0	M0039	0.0220374
Olfr716	Grin1	0	M0039	0.0602892
Olfr716	Erdr1	0	M0039	0.022232
Olfr716	Cyp2b10	0	M0039	0.0390531
Olfr716	4930583H14Rik	0	M0039	0.0916215
Olfr716	Zfp454	0	M0039	0.119841
Olfr716	Vax1	0	M0039	0.0794532
Olfr716	Hyal4	0	M0039	0.0322638
Olfr716	Ephb4	0	M0039	0.0300652
Olfr716	Olfr281	0	M0039	0.0243605
Olfr716	Cacna1b	0	M0039	0.082986
Olfr716	Pilra	0	M0039	0.0539908
Olfr716	Tcp10a	0	M0039	0.072945
Olfr716	Gap43	0	M0039	0.0690535
Olfr716	Mid2	0	M0039	0.0636105
Olfr716	Casc1	0	M0039	0.0171245
Olfr716	Aqp9	0	M0039	0.0450327
Olfr716	Omt2a	0	M0039	0.0188858
Olfr716	Arhgap24	0	M0039	0.0271515
Olfr716	Cacna1a	0	M0039	0.0425255
Olfr716	Zp1	0	M0039	0.081057
Olfr716	Sva	0	M0039	0.0400649
Olfr716	Olfr923	0	M0039	0.0149964
Olfr716	Ctps2	0	M0039	0.101093
Olfr716	Lyzl1	0	M0039	0.0224842
Olfr716	Dsc1	0	M0039	0.0188458
Olfr716	Clca4	0	M0039	0.0902094
Olfr716	Tead4	0	M0039	0.0184334
Olfr716	Olfr463	0	M0039	0.116128
Olfr716	Insl5	0	M0039	0.0479281
Olfr716	2010003O02Rik	0	M0039	0.0653242
Olfr716	Samd8	0	M0039	0.00279034
Gga1	Rasgrp4	0	M0039	0.0273398
Gga1	Sim1	0	M0039	0.025875
Gga1	Olfr1298	0	M0039	0.0351039
Gga1	Stard8	0	M0039	0.0479479
Gga1	Fbxo16	0	M0039	0.0517724
Gga1	2810474O19Rik	0	M0039	0.0341717
Gga1	Osm	0	M0039	0.0143209
Gga1	Upp1	0	M0039	0.0175095
Gga1	Cyp11a1	0	M0039	0.0532824
Gga1	Olfr878	0	M0039	0.0546812
Gga1	Mfi2	0	M0039	0.0388501
Gga1	Ifit1	0	M0039	0.0659563
Gga1	Krtap16-5	0	M0039	0.0394414
Gga1	Ifit3	0	M0039	0.0620765
Gga1	Olfr420	0	M0039	0.062333
Gga1	Galnt3	0	M0039	0.021749
Gga1	4933424G06Rik	0	M0039	0.0373894
Gga1	Mepe	0	M0039	0.0438981
Gga1	Npy	0	M0039	0.0151962
Gga1	Tcf21	0	M0039	0.0774577
Gga1	Tnfsf4	0	M0039	0.0557283
Gga1	Socs3	0	M0039	0.0403807
Gga1	Cyp19a1	0	M0039	0.0294904
Gga1	Olfr2	0	M0039	0.0201515
Gga1	Crb1	0	M0039	0.0265153
Gga1	Fabp1	0	M0039	0.0243213
Gga1	Sult1e1	0	M0039	0.0161297
Gga1	Nkg7	0	M0039	0.0591996
Gga1	Snca	0	M0039	0.0207913
Gga1	Rab25	0	M0039	0.0593449
Gga1	Abcg8	0	M0039	0.0735263
Gga1	Slc26a3	0	M0039	0.018416
Gga1	Lair1	0	M0039	0.02534
Gga1	4930485B16Rik	0	M0039	0.0533837
Gga1	Cyp2b9	0	M0039	0.0344762
Gga1	Olfr1501	0	M0039	0.01682
Gga1	4930470P17Rik	0	M0039	0.0217827
Gga1	Jarid2	0	M0039	0.0755006
Gga1	Olfr1477	0	M0039	0.0472983
Gga1	D14Ertd668e	0	M0039	0.055705
Gga1	Dclre1c	0	M0039	0.0358499
Gga1	Ms4a1	0	M0039	0.0472556
Gga1	Slamf1	0	M0039	0.0178309
Gga1	Klrb1c	0	M0039	0.0498846
Gga1	Napb	0	M0039	0.0208177
Gga1	Plg	0	M0039	0.0384194
Gga1	Dner	0	M0039	0.0258099
Gga1	Epb4.2	0	M0039	0.0196223
Gga1	Gypa	0	M0039	0.111086
Gga1	Btk	0	M0039	0.0547534
Gga1	Olfr430	0	M0039	0.0458477
Gga1	Ephb1	0	M0039	0.0254588
Gga1	Adamts7	0	M0039	0.0649694
Gga1	Nrxn3	0	M0039	0.0319051
Gga1	Hs6st3	0	M0039	0.0397825
Gga1	Gfra2	0	M0039	0.023851
Gga1	2010106E10Rik	0	M0039	0.0360989
Gga1	Olfr645	0	M0039	0.0343755
Gga1	Insm1	0	M0039	0.0332662
Gga1	Gfra3	0	M0039	0.0622887
Gga1	Tox	0	M0039	0.0350345
Gga1	Olfr803	0	M0039	0.0679447
Gga1	Ptger1	0	M0039	0.0308534
Gga1	Olfr686	0	M0039	0.0470644
Gga1	Il6	0	M0039	0.0675263
Gga1	Oas1a	0	M0039	0.0327591
Gga1	Prps1	0	M0039	0.11201
Gga1	Bspry	0	M0039	0.0239426
Gga1	Pla2g2f	0	M0039	0.0165994
Gga1	1700007B14Rik	0	M0039	0.0204377
Gga1	Stk32a	0	M0039	0.151824
Gga1	Olfr1272	0	M0039	0.0203133
Gga1	Grin1	0	M0039	0.0243537
Gga1	Erdr1	0	M0039	0.108443
Gga1	Cyp2b10	0	M0039	0.0194847
Gga1	4930583H14Rik	0	M0039	0.0271339
Gga1	Zfp454	0	M0039	0.0243564
Gga1	Vax1	0	M0039	0.037689
Gga1	Hyal4	0	M0039	0.00888636
Gga1	Ephb4	0	M0039	0.138907
Gga1	Olfr281	0	M0039	0.0421628
Gga1	Cacna1b	0	M0039	0.011165
Gga1	Pilra	0	M0039	0.0430602
Gga1	Tcp10a	0	M0039	0.0328575
Gga1	Gap43	0	M0039	0.031213
Gga1	Mid2	0	M0039	0.0486324
Gga1	Casc1	0	M0039	0.141729
Gga1	Aqp9	0	M0039	0.0340587
Gga1	Omt2a	0	M0039	0.0965222
Gga1	Arhgap24	0	M0039	0.0293977
Gga1	Cacna1a	0	M0039	0.0373948
Gga1	Zp1	0	M0039	0.0381511
Gga1	Sva	0	M0039	0.0628747
Gga1	Olfr923	0	M0039	0.122196
Gga1	Ctps2	0	M0039	0.0236767
Gga1	Lyzl1	0	M0039	0.0630667
Gga1	Dsc1	0	M0039	0.126182
Gga1	Clca4	0	M0039	0.0798377
Gga1	Tead4	0	M0039	0.0348527
Gga1	Olfr463	0	M0039	0.0234307
Gga1	Insl5	0	M0039	0.0210593
Gga1	2010003O02Rik	0	M0039	0.0403693
Gga1	Samd8	0	M0039	0.139972
Rasgrp4	Sim1	0	M0039	0.0134007
Rasgrp4	Olfr1298	0	M0039	0.0337192
Rasgrp4	Stard8	0	M0039	0.0101414
Rasgrp4	Fbxo16	0	M0039	0.0148676
Rasgrp4	2810474O19Rik	0	M0039	0.00465829
Rasgrp4	Osm	0	M0039	0.0208626
Rasgrp4	Upp1	0	M0039	0.0124473
Rasgrp4	Cyp11a1	0	M0039	0.0429937
Rasgrp4	Olfr878	0	M0039	0.0255274
Rasgrp4	Mfi2	0	M0039	0.0114375
Rasgrp4	Ifit1	0	M0039	0.00610632
Rasgrp4	Krtap16-5	0	M0039	0.0214981
Rasgrp4	Ifit3	0	M0039	0.00767352
Rasgrp4	Olfr420	0	M0039	0.0141179
Rasgrp4	Galnt3	0	M0039	0.0262765
Rasgrp4	4933424G06Rik	0	M0039	0.0367292
Rasgrp4	Mepe	0	M0039	0.0107709
Rasgrp4	Npy	0	M0039	0.0414238
Rasgrp4	Tcf21	0	M0039	0.0413426
Rasgrp4	Tnfsf4	0	M0039	0.0135447
Rasgrp4	Socs3	0	M0039	0.0159295
Rasgrp4	Cyp19a1	0	M0039	0.0141297
Rasgrp4	Olfr2	0	M0039	0.0120598
Rasgrp4	Crb1	0	M0039	0.0104847
Rasgrp4	Fabp1	0	M0039	0.0173541
Rasgrp4	Sult1e1	0	M0039	0.0334768
Rasgrp4	Nkg7	0	M0039	0.102361
Rasgrp4	Snca	0	M0039	0.0145118
Rasgrp4	Rab25	0	M0039	0.0417097
Rasgrp4	Abcg8	0	M0039	0.00805069
Rasgrp4	Slc26a3	0	M0039	0.0131811
Rasgrp4	Lair1	0	M0039	0.0244325
Rasgrp4	4930485B16Rik	0	M0039	0.0278474
Rasgrp4	Cyp2b9	0	M0039	0.10437
Rasgrp4	Olfr1501	0	M0039	0.0670539
Rasgrp4	4930470P17Rik	0	M0039	0.0171907
Rasgrp4	Jarid2	0	M0039	0.0673039
Rasgrp4	Olfr1477	0	M0039	0.00932432
Rasgrp4	D14Ertd668e	0	M0039	0.0272351
Rasgrp4	Dclre1c	0	M0039	0.0885141
Rasgrp4	Ms4a1	0	M0039	0.0456263
Rasgrp4	Slamf1	0	M0039	0.0130903
Rasgrp4	Klrb1c	0	M0039	0.0226134
Rasgrp4	Napb	0	M0039	0.0265727
Rasgrp4	Plg	0	M0039	0.106406
Rasgrp4	Dner	0	M0039	0.0268396
Rasgrp4	Epb4.2	0	M0039	0.0440397
Rasgrp4	Gypa	0	M0039	0.0217979
Rasgrp4	Btk	0	M0039	0.0418997
Rasgrp4	Olfr430	0	M0039	0.0399151
Rasgrp4	Ephb1	0	M0039	0.00765022
Rasgrp4	Adamts7	0	M0039	0.0128243
Rasgrp4	Nrxn3	0	M0039	0.0213123
Rasgrp4	Hs6st3	0	M0039	0.016249
Rasgrp4	Gfra2	0	M0039	0.0769323
Rasgrp4	2010106E10Rik	0	M0039	0.0664907
Rasgrp4	Olfr645	0	M0039	0.0456459
Rasgrp4	Insm1	0	M0039	0.0102906
Rasgrp4	Gfra3	0	M0039	0.0071901
Rasgrp4	Tox	0	M0039	0.0267424
Rasgrp4	Olfr803	0	M0039	0.00754279
Rasgrp4	Ptger1	0	M0039	0.0177821
Rasgrp4	Olfr686	0	M0039	0.0221717
Rasgrp4	Il6	0	M0039	0.0149644
Rasgrp4	Oas1a	0	M0039	0.0191371
Rasgrp4	Prps1	0	M0039	0.0141363
Rasgrp4	Bspry	0	M0039	0.037248
Rasgrp4	Pla2g2f	0	M0039	0.0196849
Rasgrp4	1700007B14Rik	0	M0039	0.0172781
Rasgrp4	Stk32a	0	M0039	0.0314638
Rasgrp4	Olfr1272	0	M0039	0.0363085
Rasgrp4	Grin1	0	M0039	0.0368822
Rasgrp4	Erdr1	0	M0039	0.0135359
Rasgrp4	Cyp2b10	0	M0039	0.0662506
Rasgrp4	4930583H14Rik	0	M0039	0.0333434
Rasgrp4	Zfp454	0	M0039	0.0139029
Rasgrp4	Vax1	0	M0039	0.0500487
Rasgrp4	Hyal4	0	M0039	0.0573445
Rasgrp4	Ephb4	0	M0039	0.0248219
Rasgrp4	Olfr281	0	M0039	0.0125682
Rasgrp4	Cacna1b	0	M0039	0.0287585
Rasgrp4	Pilra	0	M0039	0.0353628
Rasgrp4	Tcp10a	0	M0039	0.00584574
Rasgrp4	Gap43	0	M0039	0.0465996
Rasgrp4	Mid2	0	M0039	0.0103043
Rasgrp4	Casc1	0	M0039	0.0153823
Rasgrp4	Aqp9	0	M0039	0.0131798
Rasgrp4	Omt2a	0	M0039	0.00919885
Rasgrp4	Arhgap24	0	M0039	0.0149727
Rasgrp4	Cacna1a	0	M0039	0.0245822
Rasgrp4	Zp1	0	M0039	0.0297915
Rasgrp4	Sva	0	M0039	0.00819208
Rasgrp4	Olfr923	0	M0039	0.0539997
Rasgrp4	Ctps2	0	M0039	0.0180442
Rasgrp4	Lyzl1	0	M0039	0.048561
Rasgrp4	Dsc1	0	M0039	0.0658137
Rasgrp4	Clca4	0	M0039	0.0253518
Rasgrp4	Tead4	0	M0039	0.0222111
Rasgrp4	Olfr463	0	M0039	0.0124408
Rasgrp4	Insl5	0	M0039	0.0671228
Rasgrp4	2010003O02Rik	0	M0039	0.0401745
Rasgrp4	Samd8	0	M0039	0.0170872
Sim1	Olfr1298	0	M0039	0.0788706
Sim1	Stard8	0	M0039	0.0410667
Sim1	Fbxo16	0	M0039	0.0270968
Sim1	2810474O19Rik	0	M0039	0.111835
Sim1	Osm	0	M0039	0.0248544
Sim1	Upp1	0	M0039	0.0403854
Sim1	Cyp11a1	0	M0039	0.0706739
Sim1	Olfr878	0	M0039	0.0187343
Sim1	Mfi2	0	M0039	0.0117993
Sim1	Ifit1	0	M0039	0.135488
Sim1	Krtap16-5	0	M0039	0.135098
Sim1	Ifit3	0	M0039	0.100865
Sim1	Olfr420	0	M0039	0.0605084
Sim1	Galnt3	0	M0039	0.0302888
Sim1	4933424G06Rik	0	M0039	0.030817
Sim1	Mepe	0	M0039	0.0289072
Sim1	Npy	0	M0039	0.0771485
Sim1	Tcf21	0	M0039	0.0330109
Sim1	Tnfsf4	0	M0039	0.0348071
Sim1	Socs3	0	M0039	0.0171148
Sim1	Cyp19a1	0	M0039	0.0100675
Sim1	Olfr2	0	M0039	0.0220464
Sim1	Crb1	0	M0039	0.025697
Sim1	Fabp1	0	M0039	0.0354143
Sim1	Sult1e1	0	M0039	0.015493
Sim1	Nkg7	0	M0039	0.0270489
Sim1	Snca	0	M0039	0.00650517
Sim1	Rab25	0	M0039	0.0367947
Sim1	Abcg8	0	M0039	0.0209795
Sim1	Slc26a3	0	M0039	0.0175949
Sim1	Lair1	0	M0039	0.0654793
Sim1	4930485B16Rik	0	M0039	0.00981556
Sim1	Cyp2b9	0	M0039	0.0293991
Sim1	Olfr1501	0	M0039	0.0503358
Sim1	4930470P17Rik	0	M0039	0.0969444
Sim1	Jarid2	0	M0039	0.0498334
Sim1	Olfr1477	0	M0039	0.0336054
Sim1	D14Ertd668e	0	M0039	0.148074
Sim1	Dclre1c	0	M0039	0.0143154
Sim1	Ms4a1	0	M0039	0.0289004
Sim1	Slamf1	0	M0039	0.056247
Sim1	Klrb1c	0	M0039	0.0322254
Sim1	Napb	0	M0039	0.0199085
Sim1	Plg	0	M0039	0.0201704
Sim1	Dner	0	M0039	0.118208
Sim1	Epb4.2	0	M0039	0.0181301
Sim1	Gypa	0	M0039	0.0213783
Sim1	Btk	0	M0039	0.0341028
Sim1	Olfr430	0	M0039	0.0916871
Sim1	Ephb1	0	M0039	0.105618
Sim1	Adamts7	0	M0039	0.013097
Sim1	Nrxn3	0	M0039	0.0172266
Sim1	Hs6st3	0	M0039	0.149696
Sim1	Gfra2	0	M0039	0.0282408
Sim1	2010106E10Rik	0	M0039	0.0357255
Sim1	Olfr645	0	M0039	0.0195257
Sim1	Insm1	0	M0039	0.0188722
Sim1	Gfra3	0	M0039	0.0543556
Sim1	Tox	0	M0039	0.0352183
Sim1	Olfr803	0	M0039	0.011221
Sim1	Ptger1	0	M0039	0.0371263
Sim1	Olfr686	0	M0039	0.0267696
Sim1	Il6	0	M0039	0.0202914
Sim1	Oas1a	0	M0039	0.110785
Sim1	Prps1	0	M0039	0.0515484
Sim1	Bspry	0	M0039	0.0878263
Sim1	Pla2g2f	0	M0039	0.0394281
Sim1	1700007B14Rik	0	M0039	0.0178366
Sim1	Stk32a	0	M0039	0.0358149
Sim1	Olfr1272	0	M0039	0.00386108
Sim1	Grin1	0	M0039	0.0532014
Sim1	Erdr1	0	M0039	0.0148772
Sim1	Cyp2b10	0	M0039	0.0824859
Sim1	4930583H14Rik	0	M0039	0.0332993
Sim1	Zfp454	0	M0039	0.0828143
Sim1	Vax1	0	M0039	0.0268128
Sim1	Hyal4	0	M0039	0.0221672
Sim1	Ephb4	0	M0039	0.0541627
Sim1	Olfr281	0	M0039	0.0449228
Sim1	Cacna1b	0	M0039	0.0194402
Sim1	Pilra	0	M0039	0.0299206
Sim1	Tcp10a	0	M0039	0.0296041
Sim1	Gap43	0	M0039	0.0642491
Sim1	Mid2	0	M0039	0.0731273
Sim1	Casc1	0	M0039	0.0335674
Sim1	Aqp9	0	M0039	0.0853156
Sim1	Omt2a	0	M0039	0.0218761
Sim1	Arhgap24	0	M0039	0.0118849
Sim1	Cacna1a	0	M0039	0.033458
Sim1	Zp1	0	M0039	0.100188
Sim1	Sva	0	M0039	0.0524024
Sim1	Olfr923	0	M0039	0.0241997
Sim1	Ctps2	0	M0039	0.0453876
Sim1	Lyzl1	0	M0039	0.00938229
Sim1	Dsc1	0	M0039	0.0462974
Sim1	Clca4	0	M0039	0.124157
Sim1	Tead4	0	M0039	0.00735028
Sim1	Olfr463	0	M0039	0.0368613
Sim1	Insl5	0	M0039	0.0425952
Sim1	2010003O02Rik	0	M0039	0.0841189
Sim1	Samd8	0	M0039	0.0301332
Olfr1298	Stard8	0	M0039	0.075814
Olfr1298	Fbxo16	0	M0039	0.0598801
Olfr1298	2810474O19Rik	0	M0039	0.0787105
Olfr1298	Osm	0	M0039	0.0388362
Olfr1298	Upp1	0	M0039	0.0558269
Olfr1298	Cyp11a1	0	M0039	0.140201
Olfr1298	Olfr878	0	M0039	0.115007
Olfr1298	Mfi2	0	M0039	0.0283963
Olfr1298	Ifit1	0	M0039	0.0624765
Olfr1298	Krtap16-5	0	M0039	0.132889
Olfr1298	Ifit3	0	M0039	0.0634223
Olfr1298	Olfr420	0	M0039	0.0322302
Olfr1298	Galnt3	0	M0039	0.0409068
Olfr1298	4933424G06Rik	0	M0039	0.0813433
Olfr1298	Mepe	0	M0039	0.0247367
Olfr1298	Npy	0	M0039	0.0662835
Olfr1298	Tcf21	0	M0039	0.0527877
Olfr1298	Tnfsf4	0	M0039	0.0309156
Olfr1298	Socs3	0	M0039	0.037398
Olfr1298	Cyp19a1	0	M0039	0.0308381
Olfr1298	Olfr2	0	M0039	0.0376507
Olfr1298	Crb1	0	M0039	0.0399475
Olfr1298	Fabp1	0	M0039	0.0249729
Olfr1298	Sult1e1	0	M0039	0.0158783
Olfr1298	Nkg7	0	M0039	0.101544
Olfr1298	Snca	0	M0039	0.0170541
Olfr1298	Rab25	0	M0039	0.0990279
Olfr1298	Abcg8	0	M0039	0.037838
Olfr1298	Slc26a3	0	M0039	0.00757326
Olfr1298	Lair1	0	M0039	0.054456
Olfr1298	4930485B16Rik	0	M0039	0.0359061
Olfr1298	Cyp2b9	0	M0039	0.0412516
Olfr1298	Olfr1501	0	M0039	0.0540058
Olfr1298	4930470P17Rik	0	M0039	0.0608057
Olfr1298	Jarid2	0	M0039	0.101242
Olfr1298	Olfr1477	0	M0039	0.0170502
Olfr1298	D14Ertd668e	0	M0039	0.134012
Olfr1298	Dclre1c	0	M0039	0.0233353
Olfr1298	Ms4a1	0	M0039	0.0727403
Olfr1298	Slamf1	0	M0039	0.0476093
Olfr1298	Klrb1c	0	M0039	0.0997075
Olfr1298	Napb	0	M0039	0.045449
Olfr1298	Plg	0	M0039	0.08904
Olfr1298	Dner	0	M0039	0.110182
Olfr1298	Epb4.2	0	M0039	0.0329992
Olfr1298	Gypa	0	M0039	0.0314547
Olfr1298	Btk	0	M0039	0.0710728
Olfr1298	Olfr430	0	M0039	0.0638908
Olfr1298	Ephb1	0	M0039	0.0843602
Olfr1298	Adamts7	0	M0039	0.0490007
Olfr1298	Nrxn3	0	M0039	0.0401161
Olfr1298	Hs6st3	0	M0039	0.0644446
Olfr1298	Gfra2	0	M0039	0.0713589
Olfr1298	2010106E10Rik	0	M0039	0.126793
Olfr1298	Olfr645	0	M0039	0.0189935
Olfr1298	Insm1	0	M0039	0.0353865
Olfr1298	Gfra3	0	M0039	0.0532454
Olfr1298	Tox	0	M0039	0.00795008
Olfr1298	Olfr803	0	M0039	0.0197108
Olfr1298	Ptger1	0	M0039	0.0481472
Olfr1298	Olfr686	0	M0039	0.0556505
Olfr1298	Il6	0	M0039	0.0585014
Olfr1298	Oas1a	0	M0039	0.0483954
Olfr1298	Prps1	0	M0039	0.0340301
Olfr1298	Bspry	0	M0039	0.106913
Olfr1298	Pla2g2f	0	M0039	0.0251977
Olfr1298	1700007B14Rik	0	M0039	0.0130847
Olfr1298	Stk32a	0	M0039	0.0449977
Olfr1298	Olfr1272	0	M0039	0.027504
Olfr1298	Grin1	0	M0039	0.161199
Olfr1298	Erdr1	0	M0039	0.0152163
Olfr1298	Cyp2b10	0	M0039	0.0541824
Olfr1298	4930583H14Rik	0	M0039	0.0885735
Olfr1298	Zfp454	0	M0039	0.093956
Olfr1298	Vax1	0	M0039	0.0579981
Olfr1298	Hyal4	0	M0039	0.0521688
Olfr1298	Ephb4	0	M0039	0.0390472
Olfr1298	Olfr281	0	M0039	0.112947
Olfr1298	Cacna1b	0	M0039	0.0333681
Olfr1298	Pilra	0	M0039	0.0855662
Olfr1298	Tcp10a	0	M0039	0.0729808
Olfr1298	Gap43	0	M0039	0.110289
Olfr1298	Mid2	0	M0039	0.117329
Olfr1298	Casc1	0	M0039	0.0301293
Olfr1298	Aqp9	0	M0039	0.0969088
Olfr1298	Omt2a	0	M0039	0.0378194
Olfr1298	Arhgap24	0	M0039	0.0422363
Olfr1298	Cacna1a	0	M0039	0.0559343
Olfr1298	Zp1	0	M0039	0.0938303
Olfr1298	Sva	0	M0039	0.0682128
Olfr1298	Olfr923	0	M0039	0.0564792
Olfr1298	Ctps2	0	M0039	0.0619601
Olfr1298	Lyzl1	0	M0039	0.035615
Olfr1298	Dsc1	0	M0039	0.0975967
Olfr1298	Clca4	0	M0039	0.148927
Olfr1298	Tead4	0	M0039	0.0242491
Olfr1298	Olfr463	0	M0039	0.0691862
Olfr1298	Insl5	0	M0039	0.112638
Olfr1298	2010003O02Rik	0	M0039	0.0990835
Olfr1298	Samd8	0	M0039	0.0175576
Stard8	Fbxo16	0	M0039	0.0374554
Stard8	2810474O19Rik	0	M0039	0.0638451
Stard8	Osm	0	M0039	0.0715971
Stard8	Upp1	0	M0039	0.0612529
Stard8	Cyp11a1	0	M0039	0.10491
Stard8	Olfr878	0	M0039	0.0390121
Stard8	Mfi2	0	M0039	0.0304731
Stard8	Ifit1	0	M0039	0.0676746
Stard8	Krtap16-5	0	M0039	0.115448
Stard8	Ifit3	0	M0039	0.0560281
Stard8	Olfr420	0	M0039	0.053623
Stard8	Galnt3	0	M0039	0.0225855
Stard8	4933424G06Rik	0	M0039	0.0166178
Stard8	Mepe	0	M0039	0.0155088
Stard8	Npy	0	M0039	0.0546977
Stard8	Tcf21	0	M0039	0.0428216
Stard8	Tnfsf4	0	M0039	0.0161915
Stard8	Socs3	0	M0039	0.0284158
Stard8	Cyp19a1	0	M0039	0.0964383
Stard8	Olfr2	0	M0039	0.104772
Stard8	Crb1	0	M0039	0.0479625
Stard8	Fabp1	0	M0039	0.00942433
Stard8	Sult1e1	0	M0039	0.0106965
Stard8	Nkg7	0	M0039	0.0346889
Stard8	Snca	0	M0039	0.0350764
Stard8	Rab25	0	M0039	0.0785497
Stard8	Abcg8	0	M0039	0.0889139
Stard8	Slc26a3	0	M0039	0.00514371
Stard8	Lair1	0	M0039	0.0291955
Stard8	4930485B16Rik	0	M0039	0.0448831
Stard8	Cyp2b9	0	M0039	0.009044
Stard8	Olfr1501	0	M0039	0.014119
Stard8	4930470P17Rik	0	M0039	0.0933511
Stard8	Jarid2	0	M0039	0.0555143
Stard8	Olfr1477	0	M0039	0.012557
Stard8	D14Ertd668e	0	M0039	0.120162
Stard8	Dclre1c	0	M0039	0.0264536
Stard8	Ms4a1	0	M0039	0.0137345
Stard8	Slamf1	0	M0039	0.0830095
Stard8	Klrb1c	0	M0039	0.0472298
Stard8	Napb	0	M0039	0.0704497
Stard8	Plg	0	M0039	0.0306074
Stard8	Dner	0	M0039	0.113889
Stard8	Epb4.2	0	M0039	0.0322616
Stard8	Gypa	0	M0039	0.0859707
Stard8	Btk	0	M0039	0.108852
Stard8	Olfr430	0	M0039	0.0424946
Stard8	Ephb1	0	M0039	0.0933081
Stard8	Adamts7	0	M0039	0.103613
Stard8	Nrxn3	0	M0039	0.11228
Stard8	Hs6st3	0	M0039	0.0439089
Stard8	Gfra2	0	M0039	0.0220121
Stard8	2010106E10Rik	0	M0039	0.0430303
Stard8	Olfr645	0	M0039	0.0420749
Stard8	Insm1	0	M0039	0.0545277
Stard8	Gfra3	0	M0039	0.0571487
Stard8	Tox	0	M0039	0.00351528
Stard8	Olfr803	0	M0039	0.0767627
Stard8	Ptger1	0	M0039	0.0876396
Stard8	Olfr686	0	M0039	0.0803748
Stard8	Il6	0	M0039	0.0446394
Stard8	Oas1a	0	M0039	0.0329449
Stard8	Prps1	0	M0039	0.0639129
Stard8	Bspry	0	M0039	0.0619384
Stard8	Pla2g2f	0	M0039	0.0169658
Stard8	1700007B14Rik	0	M0039	0.0220065
Stard8	Stk32a	0	M0039	0.0536534
Stard8	Olfr1272	0	M0039	0.0494154
Stard8	Grin1	0	M0039	0.0541295
Stard8	Erdr1	0	M0039	0.0187245
Stard8	Cyp2b10	0	M0039	0.0179028
Stard8	4930583H14Rik	0	M0039	0.0587293
Stard8	Zfp454	0	M0039	0.117553
Stard8	Vax1	0	M0039	0.0932246
Stard8	Hyal4	0	M0039	0.0454477
Stard8	Ephb4	0	M0039	0.0560495
Stard8	Olfr281	0	M0039	0.0459598
Stard8	Cacna1b	0	M0039	0.055586
Stard8	Pilra	0	M0039	0.041877
Stard8	Tcp10a	0	M0039	0.149282
Stard8	Gap43	0	M0039	0.0449179
Stard8	Mid2	0	M0039	0.149432
Stard8	Casc1	0	M0039	0.0705084
Stard8	Aqp9	0	M0039	0.0878011
Stard8	Omt2a	0	M0039	0.12479
Stard8	Arhgap24	0	M0039	0.0817417
Stard8	Cacna1a	0	M0039	0.0354119
Stard8	Zp1	0	M0039	0.0929751
Stard8	Sva	0	M0039	0.0520964
Stard8	Olfr923	0	M0039	0.0628821
Stard8	Ctps2	0	M0039	0.119701
Stard8	Lyzl1	0	M0039	0.0475562
Stard8	Dsc1	0	M0039	0.108665
Stard8	Clca4	0	M0039	0.182689
Stard8	Tead4	0	M0039	0.0300042
Stard8	Olfr463	0	M0039	0.138228
Stard8	Insl5	0	M0039	0.0462215
Stard8	2010003O02Rik	0	M0039	0.0883239
Stard8	Samd8	0	M0039	0.0305893
Fbxo16	2810474O19Rik	0	M0039	0.0704131
Fbxo16	Osm	0	M0039	0.00913807
Fbxo16	Upp1	0	M0039	0.0168813
Fbxo16	Cyp11a1	0	M0039	0.0652467
Fbxo16	Olfr878	0	M0039	0.113157
Fbxo16	Mfi2	0	M0039	0.142663
Fbxo16	Ifit1	0	M0039	0.0373367
Fbxo16	Krtap16-5	0	M0039	0.0338883
Fbxo16	Ifit3	0	M0039	0.0334175
Fbxo16	Olfr420	0	M0039	0.0304885
Fbxo16	Galnt3	0	M0039	0.0901167
Fbxo16	4933424G06Rik	0	M0039	0.0649401
Fbxo16	Mepe	0	M0039	0.0208198
Fbxo16	Npy	0	M0039	0.0166225
Fbxo16	Tcf21	0	M0039	0.0605997
Fbxo16	Tnfsf4	0	M0039	0.0991571
Fbxo16	Socs3	0	M0039	0.151146
Fbxo16	Cyp19a1	0	M0039	0.0814608
Fbxo16	Olfr2	0	M0039	0.0199704
Fbxo16	Crb1	0	M0039	0.0889972
Fbxo16	Fabp1	0	M0039	0.127488
Fbxo16	Sult1e1	0	M0039	0.0841883
Fbxo16	Nkg7	0	M0039	0.0900935
Fbxo16	Snca	0	M0039	0.0583784
Fbxo16	Rab25	0	M0039	0.0761457
Fbxo16	Abcg8	0	M0039	0.0554421
Fbxo16	Slc26a3	0	M0039	0.0766291
Fbxo16	Lair1	0	M0039	0.109452
Fbxo16	4930485B16Rik	0	M0039	0.13539
Fbxo16	Cyp2b9	0	M0039	0.00901468
Fbxo16	Olfr1501	0	M0039	0.0429883
Fbxo16	4930470P17Rik	0	M0039	0.0250713
Fbxo16	Jarid2	0	M0039	0.126667
Fbxo16	Olfr1477	0	M0039	0.0199499
Fbxo16	D14Ertd668e	0	M0039	0.0518752
Fbxo16	Dclre1c	0	M0039	0.0127219
Fbxo16	Ms4a1	0	M0039	0.0778805
Fbxo16	Slamf1	0	M0039	0.0160391
Fbxo16	Klrb1c	0	M0039	0.139529
Fbxo16	Napb	0	M0039	0.0636211
Fbxo16	Plg	0	M0039	0.0212047
Fbxo16	Dner	0	M0039	0.0394443
Fbxo16	Epb4.2	0	M0039	0.0440946
Fbxo16	Gypa	0	M0039	0.028871
Fbxo16	Btk	0	M0039	0.0490173
Fbxo16	Olfr430	0	M0039	0.0780981
Fbxo16	Ephb1	0	M0039	0.0728027
Fbxo16	Adamts7	0	M0039	0.0991637
Fbxo16	Nrxn3	0	M0039	0.0470866
Fbxo16	Hs6st3	0	M0039	0.0207623
Fbxo16	Gfra2	0	M0039	0.0251565
Fbxo16	2010106E10Rik	0	M0039	0.071747
Fbxo16	Olfr645	0	M0039	0.0351734
Fbxo16	Insm1	0	M0039	0.0949595
Fbxo16	Gfra3	0	M0039	0.0932498
Fbxo16	Tox	0	M0039	0.0189588
Fbxo16	Olfr803	0	M0039	0.0494342
Fbxo16	Ptger1	0	M0039	0.0193581
Fbxo16	Olfr686	0	M0039	0.0485626
Fbxo16	Il6	0	M0039	0.180615
Fbxo16	Oas1a	0	M0039	0.0418201
Fbxo16	Prps1	0	M0039	0.019111
Fbxo16	Bspry	0	M0039	0.022668
Fbxo16	Pla2g2f	0	M0039	0.0725035
Fbxo16	1700007B14Rik	0	M0039	0.0702139
Fbxo16	Stk32a	0	M0039	0.0491293
Fbxo16	Olfr1272	0	M0039	0.0426624
Fbxo16	Grin1	0	M0039	0.0660494
Fbxo16	Erdr1	0	M0039	0.0165824
Fbxo16	Cyp2b10	0	M0039	0.0190704
Fbxo16	4930583H14Rik	0	M0039	0.0806798
Fbxo16	Zfp454	0	M0039	0.0398693
Fbxo16	Vax1	0	M0039	0.0779547
Fbxo16	Hyal4	0	M0039	0.0163516
Fbxo16	Ephb4	0	M0039	0.075166
Fbxo16	Olfr281	0	M0039	0.0673003
Fbxo16	Cacna1b	0	M0039	0.0236362
Fbxo16	Pilra	0	M0039	0.0952549
Fbxo16	Tcp10a	0	M0039	0.0355532
Fbxo16	Gap43	0	M0039	0.0994989
Fbxo16	Mid2	0	M0039	0.0651787
Fbxo16	Casc1	0	M0039	0.0330189
Fbxo16	Aqp9	0	M0039	0.0480919
Fbxo16	Omt2a	0	M0039	0.0727563
Fbxo16	Arhgap24	0	M0039	0.0597615
Fbxo16	Cacna1a	0	M0039	0.200623
Fbxo16	Zp1	0	M0039	0.0295124
Fbxo16	Sva	0	M0039	0.158811
Fbxo16	Olfr923	0	M0039	0.0519468
Fbxo16	Ctps2	0	M0039	0.0181528
Fbxo16	Lyzl1	0	M0039	0.054712
Fbxo16	Dsc1	0	M0039	0.0633576
Fbxo16	Clca4	0	M0039	0.0677729
Fbxo16	Tead4	0	M0039	0.109542
Fbxo16	Olfr463	0	M0039	0.0345159
Fbxo16	Insl5	0	M0039	0.0233835
Fbxo16	2010003O02Rik	0	M0039	0.0344279
Fbxo16	Samd8	0	M0039	0.0166836
2810474O19Rik	Osm	0	M0039	0.0250816
2810474O19Rik	Upp1	0	M0039	0.0348213
2810474O19Rik	Cyp11a1	0	M0039	0.100608
2810474O19Rik	Olfr878	0	M0039	0.0419578
2810474O19Rik	Mfi2	0	M0039	0.0381083
2810474O19Rik	Ifit1	0	M0039	0.129889
2810474O19Rik	Krtap16-5	0	M0039	0.112678
2810474O19Rik	Ifit3	0	M0039	0.0896633
2810474O19Rik	Olfr420	0	M0039	0.0826802
2810474O19Rik	Galnt3	0	M0039	0.0224345
2810474O19Rik	4933424G06Rik	0	M0039	0.0248614
2810474O19Rik	Mepe	0	M0039	0.0315286
2810474O19Rik	Npy	0	M0039	0.0508709
2810474O19Rik	Tcf21	0	M0039	0.0178894
2810474O19Rik	Tnfsf4	0	M0039	0.054146
2810474O19Rik	Socs3	0	M0039	0.0297795
2810474O19Rik	Cyp19a1	0	M0039	0.0341161
2810474O19Rik	Olfr2	0	M0039	0.0273719
2810474O19Rik	Crb1	0	M0039	0.0607181
2810474O19Rik	Fabp1	0	M0039	0.028448
2810474O19Rik	Sult1e1	0	M0039	0.018207
2810474O19Rik	Nkg7	0	M0039	0.0413798
2810474O19Rik	Snca	0	M0039	0.0185714
2810474O19Rik	Rab25	0	M0039	0.0461969
2810474O19Rik	Abcg8	0	M0039	0.0453833
2810474O19Rik	Slc26a3	0	M0039	0.0178998
2810474O19Rik	Lair1	0	M0039	0.0512139
2810474O19Rik	4930485B16Rik	0	M0039	0.0277892
2810474O19Rik	Cyp2b9	0	M0039	0.00725773
2810474O19Rik	Olfr1501	0	M0039	0.0178152
2810474O19Rik	4930470P17Rik	0	M0039	0.0666272
2810474O19Rik	Jarid2	0	M0039	0.069917
2810474O19Rik	Olfr1477	0	M0039	0.0229786
2810474O19Rik	D14Ertd668e	0	M0039	0.13233
2810474O19Rik	Dclre1c	0	M0039	0.0118755
2810474O19Rik	Ms4a1	0	M0039	0.0472382
2810474O19Rik	Slamf1	0	M0039	0.0502777
2810474O19Rik	Klrb1c	0	M0039	0.0919233
2810474O19Rik	Napb	0	M0039	0.0413007
2810474O19Rik	Plg	0	M0039	0.00923015
2810474O19Rik	Dner	0	M0039	0.077009
2810474O19Rik	Epb4.2	0	M0039	0.0118389
2810474O19Rik	Gypa	0	M0039	0.0338675
2810474O19Rik	Btk	0	M0039	0.0343233
2810474O19Rik	Olfr430	0	M0039	0.0993571
2810474O19Rik	Ephb1	0	M0039	0.117878
2810474O19Rik	Adamts7	0	M0039	0.0449143
2810474O19Rik	Nrxn3	0	M0039	0.0313548
2810474O19Rik	Hs6st3	0	M0039	0.1037
2810474O19Rik	Gfra2	0	M0039	0.0187988
2810474O19Rik	2010106E10Rik	0	M0039	0.0371637
2810474O19Rik	Olfr645	0	M0039	0.0251957
2810474O19Rik	Insm1	0	M0039	0.035324
2810474O19Rik	Gfra3	0	M0039	0.0823352
2810474O19Rik	Tox	0	M0039	0.0140222
2810474O19Rik	Olfr803	0	M0039	0.0356064
2810474O19Rik	Ptger1	0	M0039	0.0500696
2810474O19Rik	Olfr686	0	M0039	0.0521345
2810474O19Rik	Il6	0	M0039	0.0658841
2810474O19Rik	Oas1a	0	M0039	0.151892
2810474O19Rik	Prps1	0	M0039	0.0332443
2810474O19Rik	Bspry	0	M0039	0.050454
2810474O19Rik	Pla2g2f	0	M0039	0.0500121
2810474O19Rik	1700007B14Rik	0	M0039	0.0197602
2810474O19Rik	Stk32a	0	M0039	0.0316047
2810474O19Rik	Olfr1272	0	M0039	0.0122121
2810474O19Rik	Grin1	0	M0039	0.049938
2810474O19Rik	Erdr1	0	M0039	0.00974531
2810474O19Rik	Cyp2b10	0	M0039	0.0269044
2810474O19Rik	4930583H14Rik	0	M0039	0.0389297
2810474O19Rik	Zfp454	0	M0039	0.0693876
2810474O19Rik	Vax1	0	M0039	0.0358513
2810474O19Rik	Hyal4	0	M0039	0.0166459
2810474O19Rik	Ephb4	0	M0039	0.048809
2810474O19Rik	Olfr281	0	M0039	0.0546332
2810474O19Rik	Cacna1b	0	M0039	0.0293512
2810474O19Rik	Pilra	0	M0039	0.0506219
2810474O19Rik	Tcp10a	0	M0039	0.0581308
2810474O19Rik	Gap43	0	M0039	0.055633
2810474O19Rik	Mid2	0	M0039	0.112501
2810474O19Rik	Casc1	0	M0039	0.0331655
2810474O19Rik	Aqp9	0	M0039	0.08415
2810474O19Rik	Omt2a	0	M0039	0.0297144
2810474O19Rik	Arhgap24	0	M0039	0.0421625
2810474O19Rik	Cacna1a	0	M0039	0.0739319
2810474O19Rik	Zp1	0	M0039	0.0715655
2810474O19Rik	Sva	0	M0039	0.0949746
2810474O19Rik	Olfr923	0	M0039	0.0341873
2810474O19Rik	Ctps2	0	M0039	0.0364005
2810474O19Rik	Lyzl1	0	M0039	0.00733976
2810474O19Rik	Dsc1	0	M0039	0.0599339
2810474O19Rik	Clca4	0	M0039	0.13134
2810474O19Rik	Tead4	0	M0039	0.0136835
2810474O19Rik	Olfr463	0	M0039	0.0487755
2810474O19Rik	Insl5	0	M0039	0.0326312
2810474O19Rik	2010003O02Rik	0	M0039	0.0643833
2810474O19Rik	Samd8	0	M0039	0.0317171
Osm	Upp1	0	M0039	0.0544035
Osm	Cyp11a1	0	M0039	0.0660673
Osm	Olfr878	0	M0039	0.00707939
Osm	Mfi2	0	M0039	0.0165461
Osm	Ifit1	0	M0039	0.019228
Osm	Krtap16-5	0	M0039	0.0550351
Osm	Ifit3	0	M0039	0.00906697
Osm	Olfr420	0	M0039	0.0233523
Osm	Galnt3	0	M0039	0.00985828
Osm	4933424G06Rik	0	M0039	0.00615671
Osm	Mepe	0	M0039	0.0129155
Osm	Npy	0	M0039	0.0596065
Osm	Tcf21	0	M0039	0.0138479
Osm	Tnfsf4	0	M0039	0.0112457
Osm	Socs3	0	M0039	0.017309
Osm	Cyp19a1	0	M0039	0.067925
Osm	Olfr2	0	M0039	0.0874824
Osm	Crb1	0	M0039	0.035812
Osm	Fabp1	0	M0039	0.00528978
Osm	Sult1e1	0	M0039	0.015749
Osm	Nkg7	0	M0039	0.0301999
Osm	Snca	0	M0039	0.0686386
Osm	Rab25	0	M0039	0.0303483
Osm	Abcg8	0	M0039	0.0341128
Osm	Slc26a3	0	M0039	0.00637866
Osm	Lair1	0	M0039	0.0168624
Osm	4930485B16Rik	0	M0039	0.0183612
Osm	Cyp2b9	0	M0039	0.015316
Osm	Olfr1501	0	M0039	0.0197235
Osm	4930470P17Rik	0	M0039	0.0621887
Osm	Jarid2	0	M0039	0.0304995
Osm	Olfr1477	0	M0039	0.00831478
Osm	D14Ertd668e	0	M0039	0.0629281
Osm	Dclre1c	0	M0039	0.0409855
Osm	Ms4a1	0	M0039	0.00392146
Osm	Slamf1	0	M0039	0.035934
Osm	Klrb1c	0	M0039	0.013514
Osm	Napb	0	M0039	0.058238
Osm	Plg	0	M0039	0.0373246
Osm	Dner	0	M0039	0.0618093
Osm	Epb4.2	0	M0039	0.0230925
Osm	Gypa	0	M0039	0.0209649
Osm	Btk	0	M0039	0.0715151
Osm	Olfr430	0	M0039	0.024924
Osm	Ephb1	0	M0039	0.0478361
Osm	Adamts7	0	M0039	0.0335505
Osm	Nrxn3	0	M0039	0.0984105
Osm	Hs6st3	0	M0039	0.0352249
Osm	Gfra2	0	M0039	0.0163802
Osm	2010106E10Rik	0	M0039	0.0155789
Osm	Olfr645	0	M0039	0.0644167
Osm	Insm1	0	M0039	0.0326307
Osm	Gfra3	0	M0039	0.0291897
Osm	Tox	0	M0039	0.00967601
Osm	Olfr803	0	M0039	0.0205191
Osm	Ptger1	0	M0039	0.101547
Osm	Olfr686	0	M0039	0.0489128
Osm	Il6	0	M0039	0.00949918
Osm	Oas1a	0	M0039	0.0295724
Osm	Prps1	0	M0039	0.015249
Osm	Bspry	0	M0039	0.0747771
Osm	Pla2g2f	0	M0039	0.0120131
Osm	1700007B14Rik	0	M0039	0.0206761
Osm	Stk32a	0	M0039	0.00859518
Osm	Olfr1272	0	M0039	0.0650484
Osm	Grin1	0	M0039	0.0343609
Osm	Erdr1	0	M0039	0.0078271
Osm	Cyp2b10	0	M0039	0.0275045
Osm	4930583H14Rik	0	M0039	0.0398681
Osm	Zfp454	0	M0039	0.0824113
Osm	Vax1	0	M0039	0.103388
Osm	Hyal4	0	M0039	0.0960476
Osm	Ephb4	0	M0039	0.0105027
Osm	Olfr281	0	M0039	0.0102412
Osm	Cacna1b	0	M0039	0.110248
Osm	Pilra	0	M0039	0.025056
Osm	Tcp10a	0	M0039	0.0775995
Osm	Gap43	0	M0039	0.0270337
Osm	Mid2	0	M0039	0.0764407
Osm	Casc1	0	M0039	0.0132842
Osm	Aqp9	0	M0039	0.0309344
Osm	Omt2a	0	M0039	0.0171641
Osm	Arhgap24	0	M0039	0.044745
Osm	Cacna1a	0	M0039	0.0215449
Osm	Zp1	0	M0039	0.104534
Osm	Sva	0	M0039	0.01251
Osm	Olfr923	0	M0039	0.0166343
Osm	Ctps2	0	M0039	0.100434
Osm	Lyzl1	0	M0039	0.0251356
Osm	Dsc1	0	M0039	0.0357379
Osm	Clca4	0	M0039	0.0902438
Osm	Tead4	0	M0039	0.00658728
Osm	Olfr463	0	M0039	0.11442
Osm	Insl5	0	M0039	0.0879268
Osm	2010003O02Rik	0	M0039	0.0657904
Osm	Samd8	0	M0039	0.00988892
Upp1	Cyp11a1	0	M0039	0.0541875
Upp1	Olfr878	0	M0039	0.0263199
Upp1	Mfi2	0	M0039	0.0277128
Upp1	Ifit1	0	M0039	0.0290208
[truncated: 4,556 more rows]
