# Supplementary material for: Co-expression network analysis identified hub genes critical to triglyceride and free fatty acid metabolism as key regulators of age-related vascular dysfunction in mice
Source: Aging (Albany NY). 2019 Sep 12;11(18):7620–38. doi: 10.18632/aging.102275 (PMC6781998; doi:10.18632/aging.102275)
Supplement: Supplementary Table 17 [file aging-11-102275-s003.xlsx]

## Sheet: Sheet1
Supplementary Table 17. Edge list of top 30 genes within the blue module that is read in VisANT.
Chek2	Kcnh8	0	M0039	0.143568
Chek2	4930578C19Rik	0	M0039	0.120799
Chek2	Olfr1298	0	M0039	0.0788243
Chek2	Fbxo16	0	M0039	0.0617869
Chek2	Cyp11a1	0	M0039	0.109576
Chek2	Krtap16-5	0	M0039	0.105964
Chek2	Nkg7	0	M0039	0.0728326
Chek2	Jarid2	0	M0039	0.0667916
Chek2	D14Ertd668e	0	M0039	0.115092
Chek2	Klrb1c	0	M0039	0.0912449
Chek2	Dner	0	M0039	0.08097
Chek2	Ephb1	0	M0039	0.0589686
Chek2	Adamts7	0	M0039	0.142323
Chek2	Gfra3	0	M0039	0.0979527
Chek2	Olfr686	0	M0039	0.159219
Chek2	Grin1	0	M0039	0.0921165
Chek2	4930583H14Rik	0	M0039	0.112568
Chek2	Zfp454	0	M0039	0.0642577
Chek2	Vax1	0	M0039	0.0808183
Chek2	Pilra	0	M0039	0.12903
Chek2	Gap43	0	M0039	0.102829
Chek2	Mid2	0	M0039	0.0917934
Chek2	Cacna1a	0	M0039	0.0459947
Chek2	Zp1	0	M0039	0.074646
Chek2	Sva	0	M0039	0.0947252
Chek2	Dsc1	0	M0039	0.0916929
Chek2	Clca4	0	M0039	0.131815
Chek2	Olfr463	0	M0039	0.0898328
Chek2	2010003O02Rik	0	M0039	0.12778
Kcnh8	4930578C19Rik	0	M0039	0.10061
Kcnh8	Olfr1298	0	M0039	0.0919274
Kcnh8	Fbxo16	0	M0039	0.066244
Kcnh8	Cyp11a1	0	M0039	0.0935891
Kcnh8	Krtap16-5	0	M0039	0.105964
Kcnh8	Nkg7	0	M0039	0.0784162
Kcnh8	Jarid2	0	M0039	0.0764725
Kcnh8	D14Ertd668e	0	M0039	0.124937
Kcnh8	Klrb1c	0	M0039	0.0763609
Kcnh8	Dner	0	M0039	0.106829
Kcnh8	Ephb1	0	M0039	0.0721178
Kcnh8	Adamts7	0	M0039	0.0835272
Kcnh8	Gfra3	0	M0039	0.102259
Kcnh8	Olfr686	0	M0039	0.10097
Kcnh8	Grin1	0	M0039	0.114147
Kcnh8	4930583H14Rik	0	M0039	0.123942
Kcnh8	Zfp454	0	M0039	0.0832167
Kcnh8	Vax1	0	M0039	0.0735419
Kcnh8	Pilra	0	M0039	0.135941
Kcnh8	Gap43	0	M0039	0.144075
Kcnh8	Mid2	0	M0039	0.0783097
Kcnh8	Cacna1a	0	M0039	0.058329
Kcnh8	Zp1	0	M0039	0.0937341
Kcnh8	Sva	0	M0039	0.110042
Kcnh8	Dsc1	0	M0039	0.0722258
Kcnh8	Clca4	0	M0039	0.121597
Kcnh8	Olfr463	0	M0039	0.075265
Kcnh8	2010003O02Rik	0	M0039	0.12093
4930578C19Rik	Olfr1298	0	M0039	0.127867
4930578C19Rik	Fbxo16	0	M0039	0.0791141
4930578C19Rik	Cyp11a1	0	M0039	0.112184
4930578C19Rik	Krtap16-5	0	M0039	0.110392
4930578C19Rik	Nkg7	0	M0039	0.0790711
4930578C19Rik	Jarid2	0	M0039	0.0898149
4930578C19Rik	D14Ertd668e	0	M0039	0.101063
4930578C19Rik	Klrb1c	0	M0039	0.11547
4930578C19Rik	Dner	0	M0039	0.0826973
4930578C19Rik	Ephb1	0	M0039	0.0860717
4930578C19Rik	Adamts7	0	M0039	0.090613
4930578C19Rik	Gfra3	0	M0039	0.0818497
4930578C19Rik	Olfr686	0	M0039	0.0924573
4930578C19Rik	Grin1	0	M0039	0.138392
4930578C19Rik	4930583H14Rik	0	M0039	0.0984003
4930578C19Rik	Zfp454	0	M0039	0.0662139
4930578C19Rik	Vax1	0	M0039	0.0654749
4930578C19Rik	Pilra	0	M0039	0.0966828
4930578C19Rik	Gap43	0	M0039	0.0963701
4930578C19Rik	Mid2	0	M0039	0.116672
4930578C19Rik	Cacna1a	0	M0039	0.0652187
4930578C19Rik	Zp1	0	M0039	0.070822
4930578C19Rik	Sva	0	M0039	0.0886131
4930578C19Rik	Dsc1	0	M0039	0.0747941
4930578C19Rik	Clca4	0	M0039	0.151282
4930578C19Rik	Olfr463	0	M0039	0.0721499
4930578C19Rik	2010003O02Rik	0	M0039	0.116292
Olfr1298	Fbxo16	0	M0039	0.0598801
Olfr1298	Cyp11a1	0	M0039	0.140201
Olfr1298	Krtap16-5	0	M0039	0.132889
Olfr1298	Nkg7	0	M0039	0.101544
Olfr1298	Jarid2	0	M0039	0.101242
Olfr1298	D14Ertd668e	0	M0039	0.134012
Olfr1298	Klrb1c	0	M0039	0.0997075
Olfr1298	Dner	0	M0039	0.110182
Olfr1298	Ephb1	0	M0039	0.0843602
Olfr1298	Adamts7	0	M0039	0.0490007
Olfr1298	Gfra3	0	M0039	0.0532454
Olfr1298	Olfr686	0	M0039	0.0556505
Olfr1298	Grin1	0	M0039	0.161199
Olfr1298	4930583H14Rik	0	M0039	0.0885735
Olfr1298	Zfp454	0	M0039	0.093956
Olfr1298	Vax1	0	M0039	0.0579981
Olfr1298	Pilra	0	M0039	0.0855662
Olfr1298	Gap43	0	M0039	0.110289
Olfr1298	Mid2	0	M0039	0.117329
Olfr1298	Cacna1a	0	M0039	0.0559343
Olfr1298	Zp1	0	M0039	0.0938303
Olfr1298	Sva	0	M0039	0.0682128
Olfr1298	Dsc1	0	M0039	0.0975967
Olfr1298	Clca4	0	M0039	0.148927
Olfr1298	Olfr463	0	M0039	0.0691862
Olfr1298	2010003O02Rik	0	M0039	0.0990835
Fbxo16	Cyp11a1	0	M0039	0.0652467
Fbxo16	Krtap16-5	0	M0039	0.0338883
Fbxo16	Nkg7	0	M0039	0.0900935
Fbxo16	Jarid2	0	M0039	0.126667
Fbxo16	D14Ertd668e	0	M0039	0.0518752
Fbxo16	Klrb1c	0	M0039	0.139529
Fbxo16	Dner	0	M0039	0.0394443
Fbxo16	Ephb1	0	M0039	0.0728027
Fbxo16	Adamts7	0	M0039	0.0991637
Fbxo16	Gfra3	0	M0039	0.0932498
Fbxo16	Olfr686	0	M0039	0.0485626
Fbxo16	Grin1	0	M0039	0.0660494
Fbxo16	4930583H14Rik	0	M0039	0.0806798
Fbxo16	Zfp454	0	M0039	0.0398693
Fbxo16	Vax1	0	M0039	0.0779547
Fbxo16	Pilra	0	M0039	0.0952549
Fbxo16	Gap43	0	M0039	0.0994989
Fbxo16	Mid2	0	M0039	0.0651787
Fbxo16	Cacna1a	0	M0039	0.200623
Fbxo16	Zp1	0	M0039	0.0295124
Fbxo16	Sva	0	M0039	0.158811
Fbxo16	Dsc1	0	M0039	0.0633576
Fbxo16	Clca4	0	M0039	0.0677729
Fbxo16	Olfr463	0	M0039	0.0345159
Fbxo16	2010003O02Rik	0	M0039	0.0344279
Cyp11a1	Krtap16-5	0	M0039	0.120575
Cyp11a1	Nkg7	0	M0039	0.0997327
Cyp11a1	Jarid2	0	M0039	0.0933604
Cyp11a1	D14Ertd668e	0	M0039	0.136304
Cyp11a1	Klrb1c	0	M0039	0.130295
Cyp11a1	Dner	0	M0039	0.0914662
Cyp11a1	Ephb1	0	M0039	0.0710035
Cyp11a1	Adamts7	0	M0039	0.0828078
Cyp11a1	Gfra3	0	M0039	0.0556066
Cyp11a1	Olfr686	0	M0039	0.103478
Cyp11a1	Grin1	0	M0039	0.118363
Cyp11a1	4930583H14Rik	0	M0039	0.0909127
Cyp11a1	Zfp454	0	M0039	0.0975182
Cyp11a1	Vax1	0	M0039	0.0609938
Cyp11a1	Pilra	0	M0039	0.112631
Cyp11a1	Gap43	0	M0039	0.0945028
Cyp11a1	Mid2	0	M0039	0.108474
Cyp11a1	Cacna1a	0	M0039	0.0568906
Cyp11a1	Zp1	0	M0039	0.0795326
Cyp11a1	Sva	0	M0039	0.0813371
Cyp11a1	Dsc1	0	M0039	0.134942
Cyp11a1	Clca4	0	M0039	0.115131
Cyp11a1	Olfr463	0	M0039	0.0958416
Cyp11a1	2010003O02Rik	0	M0039	0.0816372
Krtap16-5	Nkg7	0	M0039	0.042414
Krtap16-5	Jarid2	0	M0039	0.0461833
Krtap16-5	D14Ertd668e	0	M0039	0.185059
Krtap16-5	Klrb1c	0	M0039	0.0645146
Krtap16-5	Dner	0	M0039	0.148418
Krtap16-5	Ephb1	0	M0039	0.0962337
Krtap16-5	Adamts7	0	M0039	0.0616361
Krtap16-5	Gfra3	0	M0039	0.0548209
Krtap16-5	Olfr686	0	M0039	0.0978414
Krtap16-5	Grin1	0	M0039	0.110677
Krtap16-5	4930583H14Rik	0	M0039	0.0673254
Krtap16-5	Zfp454	0	M0039	0.131339
Krtap16-5	Vax1	0	M0039	0.0534119
Krtap16-5	Pilra	0	M0039	0.0624215
Krtap16-5	Gap43	0	M0039	0.0851579
Krtap16-5	Mid2	0	M0039	0.110277
Krtap16-5	Cacna1a	0	M0039	0.0231554
Krtap16-5	Zp1	0	M0039	0.125452
Krtap16-5	Sva	0	M0039	0.0655446
Krtap16-5	Dsc1	0	M0039	0.0990976
Krtap16-5	Clca4	0	M0039	0.169641
Krtap16-5	Olfr463	0	M0039	0.101217
Krtap16-5	2010003O02Rik	0	M0039	0.141101
Nkg7	Jarid2	0	M0039	0.119436
Nkg7	D14Ertd668e	0	M0039	0.055748
Nkg7	Klrb1c	0	M0039	0.129235
Nkg7	Dner	0	M0039	0.0342597
Nkg7	Ephb1	0	M0039	0.0292589
Nkg7	Adamts7	0	M0039	0.0640131
Nkg7	Gfra3	0	M0039	0.0419087
Nkg7	Olfr686	0	M0039	0.0652439
Nkg7	Grin1	0	M0039	0.104359
Nkg7	4930583H14Rik	0	M0039	0.0904496
Nkg7	Zfp454	0	M0039	0.036125
Nkg7	Vax1	0	M0039	0.0649475
Nkg7	Pilra	0	M0039	0.122977
Nkg7	Gap43	0	M0039	0.101591
Nkg7	Mid2	0	M0039	0.0479744
Nkg7	Cacna1a	0	M0039	0.0846915
Nkg7	Zp1	0	M0039	0.0437302
Nkg7	Sva	0	M0039	0.0685203
Nkg7	Dsc1	0	M0039	0.107632
Nkg7	Clca4	0	M0039	0.0503773
Nkg7	Olfr463	0	M0039	0.0372014
Nkg7	2010003O02Rik	0	M0039	0.0471443
Jarid2	D14Ertd668e	0	M0039	0.062303
Jarid2	Klrb1c	0	M0039	0.135059
Jarid2	Dner	0	M0039	0.062525
Jarid2	Ephb1	0	M0039	0.0842703
Jarid2	Adamts7	0	M0039	0.057902
Jarid2	Gfra3	0	M0039	0.102149
Jarid2	Olfr686	0	M0039	0.0452479
Jarid2	Grin1	0	M0039	0.103497
Jarid2	4930583H14Rik	0	M0039	0.106777
Jarid2	Zfp454	0	M0039	0.0588983
Jarid2	Vax1	0	M0039	0.0632465
Jarid2	Pilra	0	M0039	0.128952
Jarid2	Gap43	0	M0039	0.100092
Jarid2	Mid2	0	M0039	0.0857487
Jarid2	Cacna1a	0	M0039	0.134727
Jarid2	Zp1	0	M0039	0.0448381
Jarid2	Sva	0	M0039	0.119044
Jarid2	Dsc1	0	M0039	0.0755329
Jarid2	Clca4	0	M0039	0.0711062
Jarid2	Olfr463	0	M0039	0.0526156
Jarid2	2010003O02Rik	0	M0039	0.0473376
D14Ertd668e	Klrb1c	0	M0039	0.0894666
D14Ertd668e	Dner	0	M0039	0.155943
D14Ertd668e	Ephb1	0	M0039	0.110248
D14Ertd668e	Adamts7	0	M0039	0.0683983
D14Ertd668e	Gfra3	0	M0039	0.0704094
D14Ertd668e	Olfr686	0	M0039	0.101631
D14Ertd668e	Grin1	0	M0039	0.11564
D14Ertd668e	4930583H14Rik	0	M0039	0.0873003
D14Ertd668e	Zfp454	0	M0039	0.158208
D14Ertd668e	Vax1	0	M0039	0.0566513
D14Ertd668e	Pilra	0	M0039	0.0924804
D14Ertd668e	Gap43	0	M0039	0.10856
D14Ertd668e	Mid2	0	M0039	0.113069
D14Ertd668e	Cacna1a	0	M0039	0.041003
D14Ertd668e	Zp1	0	M0039	0.125016
D14Ertd668e	Sva	0	M0039	0.0960658
D14Ertd668e	Dsc1	0	M0039	0.105243
D14Ertd668e	Clca4	0	M0039	0.137756
D14Ertd668e	Olfr463	0	M0039	0.119344
D14Ertd668e	2010003O02Rik	0	M0039	0.10993
Klrb1c	Dner	0	M0039	0.0488148
Klrb1c	Ephb1	0	M0039	0.064034
Klrb1c	Adamts7	0	M0039	0.0920256
Klrb1c	Gfra3	0	M0039	0.0762314
Klrb1c	Olfr686	0	M0039	0.0776229
Klrb1c	Grin1	0	M0039	0.0918041
Klrb1c	4930583H14Rik	0	M0039	0.0938247
Klrb1c	Zfp454	0	M0039	0.0417535
Klrb1c	Vax1	0	M0039	0.0598292
Klrb1c	Pilra	0	M0039	0.124293
Klrb1c	Gap43	0	M0039	0.105518
Klrb1c	Mid2	0	M0039	0.0827776
Klrb1c	Cacna1a	0	M0039	0.13894
Klrb1c	Zp1	0	M0039	0.0339851
Klrb1c	Sva	0	M0039	0.135325
Klrb1c	Dsc1	0	M0039	0.105295
Klrb1c	Clca4	0	M0039	0.0832188
Klrb1c	Olfr463	0	M0039	0.0423707
Klrb1c	2010003O02Rik	0	M0039	0.0526744
Dner	Ephb1	0	M0039	0.133933
Dner	Adamts7	0	M0039	0.0426445
Dner	Gfra3	0	M0039	0.0684322
Dner	Olfr686	0	M0039	0.0654931
Dner	Grin1	0	M0039	0.121597
Dner	4930583H14Rik	0	M0039	0.106893
Dner	Zfp454	0	M0039	0.194333
Dner	Vax1	0	M0039	0.0627534
Dner	Pilra	0	M0039	0.0799566
Dner	Gap43	0	M0039	0.109903
Dner	Mid2	0	M0039	0.101149
Dner	Cacna1a	0	M0039	0.0376849
Dner	Zp1	0	M0039	0.11756
Dner	Sva	0	M0039	0.0850996
Dner	Dsc1	0	M0039	0.0630716
Dner	Clca4	0	M0039	0.136308
Dner	Olfr463	0	M0039	0.149133
Dner	2010003O02Rik	0	M0039	0.107773
Ephb1	Adamts7	0	M0039	0.0467603
Ephb1	Gfra3	0	M0039	0.100684
Ephb1	Olfr686	0	M0039	0.042055
Ephb1	Grin1	0	M0039	0.0889387
Ephb1	4930583H14Rik	0	M0039	0.0726792
Ephb1	Zfp454	0	M0039	0.128514
Ephb1	Vax1	0	M0039	0.0550074
Ephb1	Pilra	0	M0039	0.0607852
Ephb1	Gap43	0	M0039	0.0704647
Ephb1	Mid2	0	M0039	0.115715
Ephb1	Cacna1a	0	M0039	0.0693578
Ephb1	Zp1	0	M0039	0.0800027
Ephb1	Sva	0	M0039	0.109353
Ephb1	Dsc1	0	M0039	0.0437679
Ephb1	Clca4	0	M0039	0.1514
Ephb1	Olfr463	0	M0039	0.100314
Ephb1	2010003O02Rik	0	M0039	0.0804587
Adamts7	Gfra3	0	M0039	0.0725996
Adamts7	Olfr686	0	M0039	0.156488
Adamts7	Grin1	0	M0039	0.0522365
Adamts7	4930583H14Rik	0	M0039	0.0814872
Adamts7	Zfp454	0	M0039	0.053013
Adamts7	Vax1	0	M0039	0.132683
Adamts7	Pilra	0	M0039	0.0860413
Adamts7	Gap43	0	M0039	0.0683247
Adamts7	Mid2	0	M0039	0.0887622
Adamts7	Cacna1a	0	M0039	0.083148
Adamts7	Zp1	0	M0039	0.0555063
Adamts7	Sva	0	M0039	0.0971984
Adamts7	Dsc1	0	M0039	0.0986464
Adamts7	Clca4	0	M0039	0.10282
Adamts7	Olfr463	0	M0039	0.0971005
Adamts7	2010003O02Rik	0	M0039	0.0729665
Gfra3	Olfr686	0	M0039	0.0580495
Gfra3	Grin1	0	M0039	0.0696318
Gfra3	4930583H14Rik	0	M0039	0.0771738
Gfra3	Zfp454	0	M0039	0.0664377
Gfra3	Vax1	0	M0039	0.0539316
Gfra3	Pilra	0	M0039	0.091321
Gfra3	Gap43	0	M0039	0.0693369
Gfra3	Mid2	0	M0039	0.0962592
Gfra3	Cacna1a	0	M0039	0.0847667
Gfra3	Zp1	0	M0039	0.0580782
Gfra3	Sva	0	M0039	0.13533
Gfra3	Dsc1	0	M0039	0.0409839
Gfra3	Clca4	0	M0039	0.125965
Gfra3	Olfr463	0	M0039	0.0683275
Gfra3	2010003O02Rik	0	M0039	0.0732726
Olfr686	Grin1	0	M0039	0.0654076
Olfr686	4930583H14Rik	0	M0039	0.0833173
Olfr686	Zfp454	0	M0039	0.0536201
Olfr686	Vax1	0	M0039	0.105279
Olfr686	Pilra	0	M0039	0.089247
Olfr686	Gap43	0	M0039	0.0739179
Olfr686	Mid2	0	M0039	0.072285
Olfr686	Cacna1a	0	M0039	0.0370612
Olfr686	Zp1	0	M0039	0.0685928
Olfr686	Sva	0	M0039	0.0605152
Olfr686	Dsc1	0	M0039	0.0968029
Olfr686	Clca4	0	M0039	0.108138
Olfr686	Olfr463	0	M0039	0.0938856
Olfr686	2010003O02Rik	0	M0039	0.122354
Grin1	4930583H14Rik	0	M0039	0.146429
Grin1	Zfp454	0	M0039	0.0972878
Grin1	Vax1	0	M0039	0.0793565
Grin1	Pilra	0	M0039	0.131783
Grin1	Gap43	0	M0039	0.161989
Grin1	Mid2	0	M0039	0.0983568
Grin1	Cacna1a	0	M0039	0.0708886
Grin1	Zp1	0	M0039	0.0903402
Grin1	Sva	0	M0039	0.0816681
Grin1	Dsc1	0	M0039	0.0648336
Grin1	Clca4	0	M0039	0.128061
Grin1	Olfr463	0	M0039	0.0812759
Grin1	2010003O02Rik	0	M0039	0.11477
4930583H14Rik	Zfp454	0	M0039	0.0921653
4930583H14Rik	Vax1	0	M0039	0.100934
4930583H14Rik	Pilra	0	M0039	0.169911
4930583H14Rik	Gap43	0	M0039	0.14697
4930583H14Rik	Mid2	0	M0039	0.0681236
4930583H14Rik	Cacna1a	0	M0039	0.0801992
4930583H14Rik	Zp1	0	M0039	0.0587567
4930583H14Rik	Sva	0	M0039	0.102049
4930583H14Rik	Dsc1	0	M0039	0.0571767
4930583H14Rik	Clca4	0	M0039	0.0938543
4930583H14Rik	Olfr463	0	M0039	0.114684
4930583H14Rik	2010003O02Rik	0	M0039	0.092959
Zfp454	Vax1	0	M0039	0.0891086
Zfp454	Pilra	0	M0039	0.0631205
Zfp454	Gap43	0	M0039	0.0919889
Zfp454	Mid2	0	M0039	0.123072
Zfp454	Cacna1a	0	M0039	0.0437398
Zfp454	Zp1	0	M0039	0.128925
Zfp454	Sva	0	M0039	0.0716888
Zfp454	Dsc1	0	M0039	0.0603256
Zfp454	Clca4	0	M0039	0.158756
Zfp454	Olfr463	0	M0039	0.165893
Zfp454	2010003O02Rik	0	M0039	0.0985852
Vax1	Pilra	0	M0039	0.0849963
Vax1	Gap43	0	M0039	0.084968
Vax1	Mid2	0	M0039	0.0712818
Vax1	Cacna1a	0	M0039	0.0744007
Vax1	Zp1	0	M0039	0.0890771
Vax1	Sva	0	M0039	0.0604182
Vax1	Dsc1	0	M0039	0.0631485
Vax1	Clca4	0	M0039	0.0857257
Vax1	Olfr463	0	M0039	0.135026
Vax1	2010003O02Rik	0	M0039	0.0766611
Pilra	Gap43	0	M0039	0.153958
Pilra	Mid2	0	M0039	0.0668181
Pilra	Cacna1a	0	M0039	0.0980798
Pilra	Zp1	0	M0039	0.0508883
Pilra	Sva	0	M0039	0.117433
Pilra	Dsc1	0	M0039	0.0741705
Pilra	Clca4	0	M0039	0.0819654
Pilra	Olfr463	0	M0039	0.0806522
Pilra	2010003O02Rik	0	M0039	0.0827576
Gap43	Mid2	0	M0039	0.0569235
Gap43	Cacna1a	0	M0039	0.0887481
Gap43	Zp1	0	M0039	0.0729259
Gap43	Sva	0	M0039	0.11242
Gap43	Dsc1	0	M0039	0.0658138
Gap43	Clca4	0	M0039	0.0846346
Gap43	Olfr463	0	M0039	0.0767223
Gap43	2010003O02Rik	0	M0039	0.0942974
Mid2	Cacna1a	0	M0039	0.0551185
Mid2	Zp1	0	M0039	0.097203
Mid2	Sva	0	M0039	0.0890084
Mid2	Dsc1	0	M0039	0.0811447
Mid2	Clca4	0	M0039	0.192683
Mid2	Olfr463	0	M0039	0.131306
Mid2	2010003O02Rik	0	M0039	0.0892597
Cacna1a	Zp1	0	M0039	0.0274917
Cacna1a	Sva	0	M0039	0.141904
Cacna1a	Dsc1	0	M0039	0.049266
Cacna1a	Clca4	0	M0039	0.0550266
Cacna1a	Olfr463	0	M0039	0.0410837
Cacna1a	2010003O02Rik	0	M0039	0.0275677
Zp1	Sva	0	M0039	0.0477656
Zp1	Dsc1	0	M0039	0.060655
Zp1	Clca4	0	M0039	0.152037
Zp1	Olfr463	0	M0039	0.116273
Zp1	2010003O02Rik	0	M0039	0.123948
Sva	Dsc1	0	M0039	0.0662256
Sva	Clca4	0	M0039	0.107334
Sva	Olfr463	0	M0039	0.0564295
Sva	2010003O02Rik	0	M0039	0.0587134
Dsc1	Clca4	0	M0039	0.0833616
Dsc1	Olfr463	0	M0039	0.0570358
Dsc1	2010003O02Rik	0	M0039	0.0653756
Clca4	Olfr463	0	M0039	0.153821
Clca4	2010003O02Rik	0	M0039	0.13911
Olfr463	2010003O02Rik	0	M0039	0.103544
