# Supplementary material for: Co-expression network analysis identified hub genes critical to triglyceride and free fatty acid metabolism as key regulators of age-related vascular dysfunction in mice
Source: Aging (Albany NY). 2019 Sep 12;11(18):7620–38. doi: 10.18632/aging.102275 (PMC6781998; doi:10.18632/aging.102275)
Supplement: Supplementary Table 18 [file aging-11-102275-s017.xlsx]

## Sheet: Sheet1
Supplementary Table 18. Edge list of genes within the red module that is read in VisANT.
Tnmd	Fbxo32	0	M0039	0.0849934
Tnmd	Arid2	0	M0039	0.0515395
Tnmd	1600029D21Rik	0	M0039	0.176643
Tnmd	Ms4a4b	0	M0039	0.10922
Tnmd	Cyp4f15	0	M0039	0.0447606
Tnmd	Cst7	0	M0039	0.0306345
Tnmd	Lyl1	0	M0039	0.034633
Tnmd	Ntn1	0	M0039	0.0528222
Tnmd	Ptgfrn	0	M0039	0.0697275
Tnmd	Serpinb13	0	M0039	0.177221
Tnmd	Mgst2	0	M0039	0.122089
Tnmd	Folr2	0	M0039	0.0840301
Tnmd	Nme4	0	M0039	0.130226
Tnmd	Hs6st1	0	M0039	0.162799
Tnmd	C1qa	0	M0039	0.105473
Tnmd	Slfn4	0	M0039	0.0407121
Tnmd	Rem2	0	M0039	0.0490301
Tnmd	Gk2	0	M0039	0.0557928
Tnmd	Cd83	0	M0039	0.0829409
Tnmd	Sc4mol	0	M0039	0.0526781
Tnmd	Abp1	0	M0039	0.0342027
Tnmd	Cab39	0	M0039	0.0656509
Tnmd	Il10ra	0	M0039	0.106497
Tnmd	Trpv5	0	M0039	0.0133853
Tnmd	Exo1	0	M0039	0.0332914
Tnmd	Sppl3	0	M0039	0.0313196
Tnmd	Akr1c12	0	M0039	0.0202775
Tnmd	Dpys	0	M0039	0.0676479
Tnmd	Mill1	0	M0039	0.0371977
Tnmd	Tyrobp	0	M0039	0.0632949
Tnmd	Itgb2	0	M0039	0.039277
Tnmd	Kctd16	0	M0039	0.0317022
Tnmd	Slc15a2	0	M0039	0.0553391
Tnmd	Gmip	0	M0039	0.151837
Tnmd	H2-DMb1	0	M0039	0.158653
Tnmd	Frzb	0	M0039	0.200726
Tnmd	Cdh16	0	M0039	0.11901
Tnmd	Ifitm6	0	M0039	0.060059
Tnmd	4933405O20Rik	0	M0039	0.0156548
Tnmd	2010107G23Rik	0	M0039	0.0672052
Tnmd	Csf3	0	M0039	0.0426382
Tnmd	3110009E18Rik	0	M0039	0.0262889
Tnmd	1700093K21Rik	0	M0039	0.0339152
Tnmd	4833427G06Rik	0	M0039	0.0382229
Tnmd	Aox1	0	M0039	0.0967971
Tnmd	Cdon	0	M0039	0.0595712
Tnmd	Chn1	0	M0039	0.141148
Tnmd	Mmp2	0	M0039	0.0867007
Tnmd	Cd79b	0	M0039	0.0621273
Tnmd	Rest	0	M0039	0.0360383
Tnmd	Tnnc2	0	M0039	0.027881
Tnmd	Doc2g	0	M0039	0.0492571
Tnmd	Itgb7	0	M0039	0.0845313
Tnmd	Slc6a18	0	M0039	0.0314422
Tnmd	Fmnl1	0	M0039	0.0305806
Tnmd	Irf7	0	M0039	0.0208082
Tnmd	Vnn1	0	M0039	0.12627
Tnmd	Pgc	0	M0039	0.021114
Tnmd	Npl	0	M0039	0.0423888
Tnmd	Klhl6	0	M0039	0.074959
Tnmd	Olfr1504	0	M0039	0.0501675
Tnmd	Dok2	0	M0039	0.0858816
Tnmd	Hpgd	0	M0039	0.0329332
Tnmd	Ly86	0	M0039	0.060076
Tnmd	Ropn1	0	M0039	0.00746528
Tnmd	Mak	0	M0039	0.0817505
Tnmd	S100a3	0	M0039	0.0735791
Tnmd	H2-DMa	0	M0039	0.0777552
Tnmd	Prss12	0	M0039	0.0698078
Tnmd	Bmper	0	M0039	0.158521
Tnmd	Zfp287	0	M0039	0.190547
Tnmd	Pik3cg	0	M0039	0.0467405
Tnmd	Sfrp2	0	M0039	0.177876
Tnmd	Diap3	0	M0039	0.0586768
Tnmd	Fdft1	0	M0039	0.00403111
Tnmd	Slc35d1	0	M0039	0.0663656
Tnmd	Col13a1	0	M0039	0.0382947
Tnmd	Cpa4	0	M0039	0.00292278
Tnmd	Sox11	0	M0039	0.0240067
Tnmd	1700011F03Rik	0	M0039	0.0760189
Tnmd	Nova1	0	M0039	0.0434713
Tnmd	Pcdhb13	0	M0039	0.0977144
Tnmd	Ms4a4d	0	M0039	0.127999
Tnmd	Cdc6	0	M0039	0.010528
Tnmd	Pln	0	M0039	0.0324392
Tnmd	Alms1	0	M0039	0.104586
Tnmd	Dach2	0	M0039	0.032109
Tnmd	Rnf103	0	M0039	0.0340748
Tnmd	Fgd2	0	M0039	0.186577
Tnmd	Sdc3	0	M0039	0.0904918
Tnmd	Col8a1	0	M0039	0.117793
Tnmd	2210020M01Rik	0	M0039	0.101526
Tnmd	Chrna4	0	M0039	0.0448154
Tnmd	Drd1a	0	M0039	0.03365
Tnmd	Slc9a9	0	M0039	0.0669812
Tnmd	Bpgm	0	M0039	0.109421
Tnmd	Slc15a3	0	M0039	0.108593
Tnmd	Jrk	0	M0039	0.161546
Tnmd	Kcnk5	0	M0039	0.0355685
Tnmd	Rgs18	0	M0039	0.0851645
Tnmd	AW146020	0	M0039	0.0410403
Tnmd	Lcp1	0	M0039	0.0744991
Tnmd	Oit3	0	M0039	0.0337657
Tnmd	Ccr5	0	M0039	0.0663196
Tnmd	Foxo6	0	M0039	0.0434804
Tnmd	Sncaip	0	M0039	0.0580233
Tnmd	Csf1r	0	M0039	0.140481
Tnmd	Olig1	0	M0039	0.117934
Tnmd	Chst2	0	M0039	0.0510587
Tnmd	Ccl5	0	M0039	0.0787773
Tnmd	Kbtbd10	0	M0039	0.0265952
Tnmd	Tob2	0	M0039	0.011699
Tnmd	Sertad3	0	M0039	0.0378663
Tnmd	Tmie	0	M0039	0.0462133
Tnmd	Pik3cd	0	M0039	0.0939798
Tnmd	Lrrc4b	0	M0039	0.0371965
Tnmd	Grb10	0	M0039	0.073036
Tnmd	Olfr630	0	M0039	0.00502309
Tnmd	1190002N15Rik	0	M0039	0.0337976
Tnmd	Cd68	0	M0039	0.139858
Tnmd	Trem2	0	M0039	0.0793384
Tnmd	Ppfia4	0	M0039	0.114781
Tnmd	Hcrtr1	0	M0039	0.16443
Tnmd	9430091E24Rik	0	M0039	0.103075
Tnmd	Plek	0	M0039	0.0564507
Tnmd	Mycs	0	M0039	0.0125744
Tnmd	Ltbp2	0	M0039	0.0783402
Tnmd	Mdk	0	M0039	0.23353
Tnmd	Gsg1	0	M0039	0.0170694
Tnmd	Ptges	0	M0039	0.0800822
Tnmd	H2-Q7	0	M0039	0.123371
Tnmd	Vps52	0	M0039	0.0305376
Tnmd	Olfr470	0	M0039	0.0577638
Tnmd	Hcst	0	M0039	0.0485432
Tnmd	Mrc1	0	M0039	0.0997777
Tnmd	Adam34	0	M0039	0.0720929
Tnmd	Pprc1	0	M0039	0.0388544
Tnmd	Ubtf	0	M0039	0.0489192
Tnmd	Ifi47	0	M0039	0.0287005
Tnmd	1500009C09Rik	0	M0039	0.0513508
Tnmd	C530028O21Rik	0	M0039	0.186488
Tnmd	Cdkn2a	0	M0039	0.161943
Tnmd	Fcgr1	0	M0039	0.123058
Tnmd	Oxtr	0	M0039	0.0669635
Tnmd	Gal3st1	0	M0039	0.13111
Tnmd	Sema5a	0	M0039	0.0485926
Tnmd	Olfr24	0	M0039	0.0176317
Tnmd	Prosapip1	0	M0039	0.145376
Tnmd	Adra2a	0	M0039	0.0321152
Tnmd	Muc4	0	M0039	0.0258392
Tnmd	Olfr729	0	M0039	0.0208712
Tnmd	Clcn1	0	M0039	0.0448675
Tnmd	Cabp5	0	M0039	0.149415
Tnmd	Atp1a3	0	M0039	0.102758
Tnmd	Gas7	0	M0039	0.104048
Tnmd	Msx2	0	M0039	0.0652241
Tnmd	BC013712	0	M0039	0.048875
Tnmd	Cd84	0	M0039	0.0921675
Tnmd	Apod	0	M0039	0.110428
Tnmd	G6pc2	0	M0039	0.122205
Tnmd	Gp49a	0	M0039	0.0893494
Tnmd	Cnksr2	0	M0039	0.0147927
Tnmd	Wrb	0	M0039	0.191885
Tnmd	Cyp2b19	0	M0039	0.0206755
Tnmd	Olfr975	0	M0039	0.0236511
Tnmd	Cybb	0	M0039	0.112916
Tnmd	Pou2af1	0	M0039	0.0518447
Tnmd	Traf2	0	M0039	0.08097
Tnmd	Pzp	0	M0039	0.0697682
Tnmd	1810010H24Rik	0	M0039	0.09531
Tnmd	Adcy9	0	M0039	0.0274453
Tnmd	Usp18	0	M0039	0.0310964
Tnmd	Alg12	0	M0039	0.0824859
Tnmd	Mx1	0	M0039	0.142175
Tnmd	Myo1f	0	M0039	0.166904
Tnmd	Tbc1d12	0	M0039	0.0715115
Tnmd	Akp3	0	M0039	0.0143739
Tnmd	Cd48	0	M0039	0.0481061
Tnmd	Pard6g	0	M0039	0.161778
Tnmd	Tas2r105	0	M0039	0.0311823
Tnmd	Sorl1	0	M0039	0.0822605
Tnmd	Ccl28	0	M0039	0.0225309
Tnmd	Cyp3a13	0	M0039	0.105016
Tnmd	Ptpro	0	M0039	0.0832658
Tnmd	1700065I16Rik	0	M0039	0.00932527
Tnmd	Rorb	0	M0039	0.0917569
Tnmd	4933400C23	0	M0039	0.0238428
Tnmd	4930550C17Rik	0	M0039	0.0106591
Tnmd	Prrx2	0	M0039	0.15682
Tnmd	Lrrc2	0	M0039	0.0127949
Tnmd	Sardh	0	M0039	0.141297
Tnmd	4930417G10Rik	0	M0039	0.0631601
Tnmd	Kit	0	M0039	0.0648671
Fbxo32	Arid2	0	M0039	0.120097
Fbxo32	1600029D21Rik	0	M0039	0.0507266
Fbxo32	Ms4a4b	0	M0039	0.178182
Fbxo32	Cyp4f15	0	M0039	0.0205874
Fbxo32	Cst7	0	M0039	0.125571
Fbxo32	Lyl1	0	M0039	0.013171
Fbxo32	Ntn1	0	M0039	0.148893
Fbxo32	Ptgfrn	0	M0039	0.154354
Fbxo32	Serpinb13	0	M0039	0.159776
Fbxo32	Mgst2	0	M0039	0.155671
Fbxo32	Folr2	0	M0039	0.0661026
Fbxo32	Nme4	0	M0039	0.189784
Fbxo32	Hs6st1	0	M0039	0.0681657
Fbxo32	C1qa	0	M0039	0.136324
Fbxo32	Slfn4	0	M0039	0.113029
Fbxo32	Rem2	0	M0039	0.0404312
Fbxo32	Gk2	0	M0039	0.0796147
Fbxo32	Cd83	0	M0039	0.0801916
Fbxo32	Sc4mol	0	M0039	0.0891871
Fbxo32	Abp1	0	M0039	0.0340808
Fbxo32	Cab39	0	M0039	0.127586
Fbxo32	Il10ra	0	M0039	0.149933
Fbxo32	Trpv5	0	M0039	0.0379163
Fbxo32	Exo1	0	M0039	0.0936941
Fbxo32	Sppl3	0	M0039	0.0677041
Fbxo32	Akr1c12	0	M0039	0.144254
Fbxo32	Dpys	0	M0039	0.0570338
Fbxo32	Mill1	0	M0039	0.0172497
Fbxo32	Tyrobp	0	M0039	0.142579
Fbxo32	Itgb2	0	M0039	0.078126
Fbxo32	Kctd16	0	M0039	0.133257
Fbxo32	Slc15a2	0	M0039	0.0335168
Fbxo32	Gmip	0	M0039	0.130913
Fbxo32	H2-DMb1	0	M0039	0.187672
Fbxo32	Frzb	0	M0039	0.0826903
Fbxo32	Cdh16	0	M0039	0.0727315
Fbxo32	Ifitm6	0	M0039	0.081745
Fbxo32	4933405O20Rik	0	M0039	0.00870683
Fbxo32	2010107G23Rik	0	M0039	0.230154
Fbxo32	Csf3	0	M0039	0.106604
Fbxo32	3110009E18Rik	0	M0039	0.0240191
Fbxo32	1700093K21Rik	0	M0039	0.0148606
Fbxo32	4833427G06Rik	0	M0039	0.0645162
Fbxo32	Aox1	0	M0039	0.215934
Fbxo32	Cdon	0	M0039	0.0803954
Fbxo32	Chn1	0	M0039	0.180532
Fbxo32	Mmp2	0	M0039	0.0475166
Fbxo32	Cd79b	0	M0039	0.126043
Fbxo32	Rest	0	M0039	0.147579
Fbxo32	Tnnc2	0	M0039	0.119191
Fbxo32	Doc2g	0	M0039	0.076932
Fbxo32	Itgb7	0	M0039	0.143765
Fbxo32	Slc6a18	0	M0039	0.0112788
Fbxo32	Fmnl1	0	M0039	0.0586874
Fbxo32	Irf7	0	M0039	0.0872896
Fbxo32	Vnn1	0	M0039	0.134001
Fbxo32	Pgc	0	M0039	0.0685958
Fbxo32	Npl	0	M0039	0.0972683
Fbxo32	Klhl6	0	M0039	0.144091
Fbxo32	Olfr1504	0	M0039	0.0624445
Fbxo32	Dok2	0	M0039	0.0940731
Fbxo32	Hpgd	0	M0039	0.0586334
Fbxo32	Ly86	0	M0039	0.165352
Fbxo32	Ropn1	0	M0039	0.0516915
Fbxo32	Mak	0	M0039	0.134058
Fbxo32	S100a3	0	M0039	0.0672086
Fbxo32	H2-DMa	0	M0039	0.180445
Fbxo32	Prss12	0	M0039	0.0697335
Fbxo32	Bmper	0	M0039	0.0848955
Fbxo32	Zfp287	0	M0039	0.0765351
Fbxo32	Pik3cg	0	M0039	0.0777357
Fbxo32	Sfrp2	0	M0039	0.0451195
Fbxo32	Diap3	0	M0039	0.0971056
Fbxo32	Fdft1	0	M0039	0.0185786
Fbxo32	Slc35d1	0	M0039	0.0833412
Fbxo32	Col13a1	0	M0039	0.0344742
Fbxo32	Cpa4	0	M0039	0.0268508
Fbxo32	Sox11	0	M0039	0.0270609
Fbxo32	1700011F03Rik	0	M0039	0.128606
Fbxo32	Nova1	0	M0039	0.106494
Fbxo32	Pcdhb13	0	M0039	0.0262763
Fbxo32	Ms4a4d	0	M0039	0.0356676
Fbxo32	Cdc6	0	M0039	0.00553875
Fbxo32	Pln	0	M0039	0.0502064
Fbxo32	Alms1	0	M0039	0.0900285
Fbxo32	Dach2	0	M0039	0.0937638
Fbxo32	Rnf103	0	M0039	0.0470553
Fbxo32	Fgd2	0	M0039	0.228365
Fbxo32	Sdc3	0	M0039	0.137261
Fbxo32	Col8a1	0	M0039	0.0445635
Fbxo32	2210020M01Rik	0	M0039	0.126076
Fbxo32	Chrna4	0	M0039	0.0867618
Fbxo32	Drd1a	0	M0039	0.0297976
Fbxo32	Slc9a9	0	M0039	0.0534646
Fbxo32	Bpgm	0	M0039	0.068221
Fbxo32	Slc15a3	0	M0039	0.0687481
Fbxo32	Jrk	0	M0039	0.0424632
Fbxo32	Kcnk5	0	M0039	0.0768836
Fbxo32	Rgs18	0	M0039	0.0484419
Fbxo32	AW146020	0	M0039	0.0990784
Fbxo32	Lcp1	0	M0039	0.139646
Fbxo32	Oit3	0	M0039	0.096411
Fbxo32	Ccr5	0	M0039	0.0651977
Fbxo32	Foxo6	0	M0039	0.0265894
Fbxo32	Sncaip	0	M0039	0.093456
Fbxo32	Csf1r	0	M0039	0.151637
Fbxo32	Olig1	0	M0039	0.116249
Fbxo32	Chst2	0	M0039	0.0455278
Fbxo32	Ccl5	0	M0039	0.123431
Fbxo32	Kbtbd10	0	M0039	0.0761011
Fbxo32	Tob2	0	M0039	0.0173015
Fbxo32	Sertad3	0	M0039	0.0870036
Fbxo32	Tmie	0	M0039	0.100364
Fbxo32	Pik3cd	0	M0039	0.0846426
Fbxo32	Lrrc4b	0	M0039	0.0420546
Fbxo32	Grb10	0	M0039	0.150577
Fbxo32	Olfr630	0	M0039	0.00410986
Fbxo32	1190002N15Rik	0	M0039	0.0608361
Fbxo32	Cd68	0	M0039	0.188631
Fbxo32	Trem2	0	M0039	0.0555081
Fbxo32	Ppfia4	0	M0039	0.110554
Fbxo32	Hcrtr1	0	M0039	0.11632
Fbxo32	9430091E24Rik	0	M0039	0.0736915
Fbxo32	Plek	0	M0039	0.0690916
Fbxo32	Mycs	0	M0039	0.0213311
Fbxo32	Ltbp2	0	M0039	0.186691
Fbxo32	Mdk	0	M0039	0.0652537
Fbxo32	Gsg1	0	M0039	0.0676026
Fbxo32	Ptges	0	M0039	0.171488
Fbxo32	H2-Q7	0	M0039	0.264628
Fbxo32	Vps52	0	M0039	0.0916361
Fbxo32	Olfr470	0	M0039	0.171154
Fbxo32	Hcst	0	M0039	0.108343
Fbxo32	Mrc1	0	M0039	0.0725061
Fbxo32	Adam34	0	M0039	0.073647
Fbxo32	Pprc1	0	M0039	0.131545
Fbxo32	Ubtf	0	M0039	0.108282
Fbxo32	Ifi47	0	M0039	0.138107
Fbxo32	1500009C09Rik	0	M0039	0.0595831
Fbxo32	C530028O21Rik	0	M0039	0.109793
Fbxo32	Cdkn2a	0	M0039	0.146762
Fbxo32	Fcgr1	0	M0039	0.197316
Fbxo32	Oxtr	0	M0039	0.0950391
Fbxo32	Gal3st1	0	M0039	0.0517019
Fbxo32	Sema5a	0	M0039	0.190232
Fbxo32	Olfr24	0	M0039	0.0538987
Fbxo32	Prosapip1	0	M0039	0.0960412
Fbxo32	Adra2a	0	M0039	0.0816432
Fbxo32	Muc4	0	M0039	0.0373751
Fbxo32	Olfr729	0	M0039	0.00883058
Fbxo32	Clcn1	0	M0039	0.123818
Fbxo32	Cabp5	0	M0039	0.118668
Fbxo32	Atp1a3	0	M0039	0.168763
Fbxo32	Gas7	0	M0039	0.0811706
Fbxo32	Msx2	0	M0039	0.14179
Fbxo32	BC013712	0	M0039	0.138366
Fbxo32	Cd84	0	M0039	0.108238
Fbxo32	Apod	0	M0039	0.0283747
Fbxo32	G6pc2	0	M0039	0.0857431
Fbxo32	Gp49a	0	M0039	0.118741
Fbxo32	Cnksr2	0	M0039	0.113812
Fbxo32	Wrb	0	M0039	0.194193
Fbxo32	Cyp2b19	0	M0039	0.0399476
Fbxo32	Olfr975	0	M0039	0.0532074
Fbxo32	Cybb	0	M0039	0.174166
Fbxo32	Pou2af1	0	M0039	0.0541163
Fbxo32	Traf2	0	M0039	0.0539717
Fbxo32	Pzp	0	M0039	0.165863
Fbxo32	1810010H24Rik	0	M0039	0.132234
Fbxo32	Adcy9	0	M0039	0.0828969
Fbxo32	Usp18	0	M0039	0.171503
Fbxo32	Alg12	0	M0039	0.107946
Fbxo32	Mx1	0	M0039	0.15683
Fbxo32	Myo1f	0	M0039	0.254537
Fbxo32	Tbc1d12	0	M0039	0.0331032
Fbxo32	Akp3	0	M0039	0.0155703
Fbxo32	Cd48	0	M0039	0.183741
Fbxo32	Pard6g	0	M0039	0.069483
Fbxo32	Tas2r105	0	M0039	0.00794193
Fbxo32	Sorl1	0	M0039	0.193122
Fbxo32	Ccl28	0	M0039	0.06091
Fbxo32	Cyp3a13	0	M0039	0.271859
Fbxo32	Ptpro	0	M0039	0.107507
Fbxo32	1700065I16Rik	0	M0039	0.00443293
Fbxo32	Rorb	0	M0039	0.0429883
Fbxo32	4933400C23	0	M0039	0.0881
Fbxo32	4930550C17Rik	0	M0039	0.0164165
Fbxo32	Prrx2	0	M0039	0.0737508
Fbxo32	Lrrc2	0	M0039	0.0657198
Fbxo32	Sardh	0	M0039	0.206904
Fbxo32	4930417G10Rik	0	M0039	0.0638993
Fbxo32	Kit	0	M0039	0.128812
Arid2	1600029D21Rik	0	M0039	0.0705561
Arid2	Ms4a4b	0	M0039	0.088419
Arid2	Cyp4f15	0	M0039	0.0326767
Arid2	Cst7	0	M0039	0.102471
Arid2	Lyl1	0	M0039	0.00730678
Arid2	Ntn1	0	M0039	0.132785
Arid2	Ptgfrn	0	M0039	0.110631
Arid2	Serpinb13	0	M0039	0.0870696
Arid2	Mgst2	0	M0039	0.0624018
Arid2	Folr2	0	M0039	0.0165588
Arid2	Nme4	0	M0039	0.0807201
Arid2	Hs6st1	0	M0039	0.0771511
Arid2	C1qa	0	M0039	0.0331896
Arid2	Slfn4	0	M0039	0.153173
Arid2	Rem2	0	M0039	0.0394363
Arid2	Gk2	0	M0039	0.0326757
Arid2	Cd83	0	M0039	0.03181
Arid2	Sc4mol	0	M0039	0.0365649
Arid2	Abp1	0	M0039	0.0848921
Arid2	Cab39	0	M0039	0.10606
Arid2	Il10ra	0	M0039	0.058943
Arid2	Trpv5	0	M0039	0.0687286
Arid2	Exo1	0	M0039	0.083272
Arid2	Sppl3	0	M0039	0.0255869
Arid2	Akr1c12	0	M0039	0.172809
Arid2	Dpys	0	M0039	0.0593603
Arid2	Mill1	0	M0039	0.00904617
Arid2	Tyrobp	0	M0039	0.0408435
Arid2	Itgb2	0	M0039	0.0180377
Arid2	Kctd16	0	M0039	0.111198
Arid2	Slc15a2	0	M0039	0.00935144
Arid2	Gmip	0	M0039	0.0826423
Arid2	H2-DMb1	0	M0039	0.0960786
Arid2	Frzb	0	M0039	0.0699575
Arid2	Cdh16	0	M0039	0.0384387
Arid2	Ifitm6	0	M0039	0.0308949
Arid2	4933405O20Rik	0	M0039	0.0163301
Arid2	2010107G23Rik	0	M0039	0.17303
Arid2	Csf3	0	M0039	0.0770184
Arid2	3110009E18Rik	0	M0039	0.0170073
Arid2	1700093K21Rik	0	M0039	0.0183998
Arid2	4833427G06Rik	0	M0039	0.0305976
Arid2	Aox1	0	M0039	0.0927225
Arid2	Cdon	0	M0039	0.0506133
Arid2	Chn1	0	M0039	0.112293
Arid2	Mmp2	0	M0039	0.0202217
Arid2	Cd79b	0	M0039	0.114526
Arid2	Rest	0	M0039	0.147233
Arid2	Tnnc2	0	M0039	0.138291
Arid2	Doc2g	0	M0039	0.0481224
Arid2	Itgb7	0	M0039	0.0641295
Arid2	Slc6a18	0	M0039	0.0179414
Arid2	Fmnl1	0	M0039	0.0315082
Arid2	Irf7	0	M0039	0.0675146
Arid2	Vnn1	0	M0039	0.121469
Arid2	Pgc	0	M0039	0.080487
Arid2	Npl	0	M0039	0.050907
Arid2	Klhl6	0	M0039	0.137878
Arid2	Olfr1504	0	M0039	0.0783311
Arid2	Dok2	0	M0039	0.0226748
Arid2	Hpgd	0	M0039	0.0616243
Arid2	Ly86	0	M0039	0.0716362
Arid2	Ropn1	0	M0039	0.109429
Arid2	Mak	0	M0039	0.046891
Arid2	S100a3	0	M0039	0.0725666
Arid2	H2-DMa	0	M0039	0.108352
Arid2	Prss12	0	M0039	0.139855
Arid2	Bmper	0	M0039	0.0362151
Arid2	Zfp287	0	M0039	0.0950422
Arid2	Pik3cg	0	M0039	0.0929722
Arid2	Sfrp2	0	M0039	0.0744593
Arid2	Diap3	0	M0039	0.0609831
Arid2	Fdft1	0	M0039	0.0435584
Arid2	Slc35d1	0	M0039	0.0474506
Arid2	Col13a1	0	M0039	0.0204545
Arid2	Cpa4	0	M0039	0.0744184
Arid2	Sox11	0	M0039	0.0179303
Arid2	1700011F03Rik	0	M0039	0.0530816
Arid2	Nova1	0	M0039	0.0701121
Arid2	Pcdhb13	0	M0039	0.022842
Arid2	Ms4a4d	0	M0039	0.019246
Arid2	Cdc6	0	M0039	0.010098
Arid2	Pln	0	M0039	0.0670926
Arid2	Alms1	0	M0039	0.0388682
Arid2	Dach2	0	M0039	0.112746
Arid2	Rnf103	0	M0039	0.133483
Arid2	Fgd2	0	M0039	0.0950383
Arid2	Sdc3	0	M0039	0.0656915
Arid2	Col8a1	0	M0039	0.0111019
Arid2	2210020M01Rik	0	M0039	0.0301187
Arid2	Chrna4	0	M0039	0.0676661
Arid2	Drd1a	0	M0039	0.017207
Arid2	Slc9a9	0	M0039	0.034165
Arid2	Bpgm	0	M0039	0.0615084
Arid2	Slc15a3	0	M0039	0.0626023
Arid2	Jrk	0	M0039	0.0540327
Arid2	Kcnk5	0	M0039	0.0383565
Arid2	Rgs18	0	M0039	0.0271088
Arid2	AW146020	0	M0039	0.170226
Arid2	Lcp1	0	M0039	0.0422798
Arid2	Oit3	0	M0039	0.0504059
Arid2	Ccr5	0	M0039	0.0312083
Arid2	Foxo6	0	M0039	0.00876141
Arid2	Sncaip	0	M0039	0.0538066
Arid2	Csf1r	0	M0039	0.0659374
Arid2	Olig1	0	M0039	0.100162
Arid2	Chst2	0	M0039	0.0216468
Arid2	Ccl5	0	M0039	0.0456818
Arid2	Kbtbd10	0	M0039	0.0557746
Arid2	Tob2	0	M0039	0.0239682
Arid2	Sertad3	0	M0039	0.0381043
Arid2	Tmie	0	M0039	0.0882799
Arid2	Pik3cd	0	M0039	0.0214329
Arid2	Lrrc4b	0	M0039	0.0159456
Arid2	Grb10	0	M0039	0.118623
Arid2	Olfr630	0	M0039	0.0228809
Arid2	1190002N15Rik	0	M0039	0.101911
Arid2	Cd68	0	M0039	0.0595457
Arid2	Trem2	0	M0039	0.0176551
Arid2	Ppfia4	0	M0039	0.0738046
Arid2	Hcrtr1	0	M0039	0.0726577
Arid2	9430091E24Rik	0	M0039	0.0951291
Arid2	Plek	0	M0039	0.0308395
Arid2	Mycs	0	M0039	0.0452951
Arid2	Ltbp2	0	M0039	0.120096
Arid2	Mdk	0	M0039	0.0708295
Arid2	Gsg1	0	M0039	0.119804
Arid2	Ptges	0	M0039	0.0546871
Arid2	H2-Q7	0	M0039	0.114053
Arid2	Vps52	0	M0039	0.0902933
Arid2	Olfr470	0	M0039	0.119922
Arid2	Hcst	0	M0039	0.0392878
Arid2	Mrc1	0	M0039	0.018201
Arid2	Adam34	0	M0039	0.0226158
Arid2	Pprc1	0	M0039	0.171194
Arid2	Ubtf	0	M0039	0.0543802
Arid2	Ifi47	0	M0039	0.119856
Arid2	1500009C09Rik	0	M0039	0.0585476
Arid2	C530028O21Rik	0	M0039	0.0846895
Arid2	Cdkn2a	0	M0039	0.0785902
Arid2	Fcgr1	0	M0039	0.0983961
Arid2	Oxtr	0	M0039	0.0553316
Arid2	Gal3st1	0	M0039	0.0155549
Arid2	Sema5a	0	M0039	0.124764
Arid2	Olfr24	0	M0039	0.0627221
Arid2	Prosapip1	0	M0039	0.100925
Arid2	Adra2a	0	M0039	0.062644
Arid2	Muc4	0	M0039	0.0440951
Arid2	Olfr729	0	M0039	0.0204321
Arid2	Clcn1	0	M0039	0.140581
Arid2	Cabp5	0	M0039	0.109379
Arid2	Atp1a3	0	M0039	0.0627363
Arid2	Gas7	0	M0039	0.0437021
Arid2	Msx2	0	M0039	0.165441
Arid2	BC013712	0	M0039	0.095208
Arid2	Cd84	0	M0039	0.03744
Arid2	Apod	0	M0039	0.0143208
Arid2	G6pc2	0	M0039	0.0730368
Arid2	Gp49a	0	M0039	0.0319278
Arid2	Cnksr2	0	M0039	0.171166
Arid2	Wrb	0	M0039	0.117836
Arid2	Cyp2b19	0	M0039	0.0253782
Arid2	Olfr975	0	M0039	0.0393853
Arid2	Cybb	0	M0039	0.0662677
Arid2	Pou2af1	0	M0039	0.0534116
Arid2	Traf2	0	M0039	0.033462
Arid2	Pzp	0	M0039	0.165809
Arid2	1810010H24Rik	0	M0039	0.0575733
Arid2	Adcy9	0	M0039	0.0502571
Arid2	Usp18	0	M0039	0.136048
Arid2	Alg12	0	M0039	0.112761
Arid2	Mx1	0	M0039	0.177809
Arid2	Myo1f	0	M0039	0.0998202
Arid2	Tbc1d12	0	M0039	0.0641662
Arid2	Akp3	0	M0039	0.0919696
Arid2	Cd48	0	M0039	0.131257
Arid2	Pard6g	0	M0039	0.0855116
Arid2	Tas2r105	0	M0039	0.00643539
Arid2	Sorl1	0	M0039	0.155786
Arid2	Ccl28	0	M0039	0.0632566
Arid2	Cyp3a13	0	M0039	0.122058
Arid2	Ptpro	0	M0039	0.0385493
Arid2	1700065I16Rik	0	M0039	0.00263559
Arid2	Rorb	0	M0039	0.0511135
Arid2	4933400C23	0	M0039	0.0738387
Arid2	4930550C17Rik	0	M0039	0.0202065
Arid2	Prrx2	0	M0039	0.107102
Arid2	Lrrc2	0	M0039	0.0628261
Arid2	Sardh	0	M0039	0.167078
Arid2	4930417G10Rik	0	M0039	0.0693505
Arid2	Kit	0	M0039	0.13758
1600029D21Rik	Ms4a4b	0	M0039	0.0813567
1600029D21Rik	Cyp4f15	0	M0039	0.0368216
1600029D21Rik	Cst7	0	M0039	0.0209703
1600029D21Rik	Lyl1	0	M0039	0.0235545
1600029D21Rik	Ntn1	0	M0039	0.0573498
1600029D21Rik	Ptgfrn	0	M0039	0.0738809
1600029D21Rik	Serpinb13	0	M0039	0.162646
1600029D21Rik	Mgst2	0	M0039	0.0636116
1600029D21Rik	Folr2	0	M0039	0.0606816
1600029D21Rik	Nme4	0	M0039	0.0789574
1600029D21Rik	Hs6st1	0	M0039	0.197017
1600029D21Rik	C1qa	0	M0039	0.0511762
1600029D21Rik	Slfn4	0	M0039	0.0429099
1600029D21Rik	Rem2	0	M0039	0.0729771
1600029D21Rik	Gk2	0	M0039	0.0151432
1600029D21Rik	Cd83	0	M0039	0.0673664
1600029D21Rik	Sc4mol	0	M0039	0.0155848
1600029D21Rik	Abp1	0	M0039	0.0227434
1600029D21Rik	Cab39	0	M0039	0.0665166
1600029D21Rik	Il10ra	0	M0039	0.0462366
1600029D21Rik	Trpv5	0	M0039	0.0157056
1600029D21Rik	Exo1	0	M0039	0.0293958
1600029D21Rik	Sppl3	0	M0039	0.0167213
1600029D21Rik	Akr1c12	0	M0039	0.0187345
1600029D21Rik	Dpys	0	M0039	0.055985
1600029D21Rik	Mill1	0	M0039	0.0130215
1600029D21Rik	Tyrobp	0	M0039	0.0183454
1600029D21Rik	Itgb2	0	M0039	0.0112872
1600029D21Rik	Kctd16	0	M0039	0.0330085
1600029D21Rik	Slc15a2	0	M0039	0.0549447
1600029D21Rik	Gmip	0	M0039	0.140722
1600029D21Rik	H2-DMb1	0	M0039	0.111101
1600029D21Rik	Frzb	0	M0039	0.197412
1600029D21Rik	Cdh16	0	M0039	0.107824
1600029D21Rik	Ifitm6	0	M0039	0.0235498
1600029D21Rik	4933405O20Rik	0	M0039	0.01923
1600029D21Rik	2010107G23Rik	0	M0039	0.0534799
1600029D21Rik	Csf3	0	M0039	0.0305536
1600029D21Rik	3110009E18Rik	0	M0039	0.0152114
1600029D21Rik	1700093K21Rik	0	M0039	0.0282585
1600029D21Rik	4833427G06Rik	0	M0039	0.0434172
1600029D21Rik	Aox1	0	M0039	0.0544801
1600029D21Rik	Cdon	0	M0039	0.0746817
1600029D21Rik	Chn1	0	M0039	0.113394
1600029D21Rik	Mmp2	0	M0039	0.0798151
1600029D21Rik	Cd79b	0	M0039	0.0464693
1600029D21Rik	Rest	0	M0039	0.0278037
1600029D21Rik	Tnnc2	0	M0039	0.0413124
1600029D21Rik	Doc2g	0	M0039	0.0404634
1600029D21Rik	Itgb7	0	M0039	0.0402766
1600029D21Rik	Slc6a18	0	M0039	0.0460363
1600029D21Rik	Fmnl1	0	M0039	0.0150341
1600029D21Rik	Irf7	0	M0039	0.00960804
1600029D21Rik	Vnn1	0	M0039	0.130771
1600029D21Rik	Pgc	0	M0039	0.0205192
1600029D21Rik	Npl	0	M0039	0.0176308
1600029D21Rik	Klhl6	0	M0039	0.0742588
1600029D21Rik	Olfr1504	0	M0039	0.0670295
1600029D21Rik	Dok2	0	M0039	0.044658
1600029D21Rik	Hpgd	0	M0039	0.023405
1600029D21Rik	Ly86	0	M0039	0.0251966
1600029D21Rik	Ropn1	0	M0039	0.00803669
1600029D21Rik	Mak	0	M0039	0.035894
1600029D21Rik	S100a3	0	M0039	0.0465161
1600029D21Rik	H2-DMa	0	M0039	0.0606747
1600029D21Rik	Prss12	0	M0039	0.0624487
1600029D21Rik	Bmper	0	M0039	0.160102
1600029D21Rik	Zfp287	0	M0039	0.200356
1600029D21Rik	Pik3cg	0	M0039	0.0378409
1600029D21Rik	Sfrp2	0	M0039	0.244495
1600029D21Rik	Diap3	0	M0039	0.0510519
1600029D21Rik	Fdft1	0	M0039	0.00678869
1600029D21Rik	Slc35d1	0	M0039	0.0250291
1600029D21Rik	Col13a1	0	M0039	0.0168513
1600029D21Rik	Cpa4	0	M0039	0.00790677
1600029D21Rik	Sox11	0	M0039	0.00887301
1600029D21Rik	1700011F03Rik	0	M0039	0.0540666
1600029D21Rik	Nova1	0	M0039	0.0266232
1600029D21Rik	Pcdhb13	0	M0039	0.136178
1600029D21Rik	Ms4a4d	0	M0039	0.111843
1600029D21Rik	Cdc6	0	M0039	0.00586167
1600029D21Rik	Pln	0	M0039	0.0259488
1600029D21Rik	Alms1	0	M0039	0.0815548
1600029D21Rik	Dach2	0	M0039	0.0369525
1600029D21Rik	Rnf103	0	M0039	0.0459098
1600029D21Rik	Fgd2	0	M0039	0.111343
1600029D21Rik	Sdc3	0	M0039	0.0706088
1600029D21Rik	Col8a1	0	M0039	0.0852376
1600029D21Rik	2210020M01Rik	0	M0039	0.0537239
1600029D21Rik	Chrna4	0	M0039	0.0542397
1600029D21Rik	Drd1a	0	M0039	0.0398081
1600029D21Rik	Slc9a9	0	M0039	0.0533613
1600029D21Rik	Bpgm	0	M0039	0.11699
1600029D21Rik	Slc15a3	0	M0039	0.0939144
1600029D21Rik	Jrk	0	M0039	0.209907
1600029D21Rik	Kcnk5	0	M0039	0.0124145
1600029D21Rik	Rgs18	0	M0039	0.0598533
1600029D21Rik	AW146020	0	M0039	0.0473934
1600029D21Rik	Lcp1	0	M0039	0.0256908
1600029D21Rik	Oit3	0	M0039	0.0217406
1600029D21Rik	Ccr5	0	M0039	0.0318554
1600029D21Rik	Foxo6	0	M0039	0.050342
1600029D21Rik	Sncaip	0	M0039	0.0605703
1600029D21Rik	Csf1r	0	M0039	0.10876
1600029D21Rik	Olig1	0	M0039	0.102883
1600029D21Rik	Chst2	0	M0039	0.04217
1600029D21Rik	Ccl5	0	M0039	0.0466212
1600029D21Rik	Kbtbd10	0	M0039	0.0329219
1600029D21Rik	Tob2	0	M0039	0.00876572
1600029D21Rik	Sertad3	0	M0039	0.0234785
1600029D21Rik	Tmie	0	M0039	0.020257
1600029D21Rik	Pik3cd	0	M0039	0.0603627
1600029D21Rik	Lrrc4b	0	M0039	0.0309908
1600029D21Rik	Grb10	0	M0039	0.0792835
1600029D21Rik	Olfr630	0	M0039	0.0165347
1600029D21Rik	1190002N15Rik	0	M0039	0.0411878
1600029D21Rik	Cd68	0	M0039	0.0718411
1600029D21Rik	Trem2	0	M0039	0.0555075
1600029D21Rik	Ppfia4	0	M0039	0.0694223
1600029D21Rik	Hcrtr1	0	M0039	0.164265
1600029D21Rik	9430091E24Rik	0	M0039	0.0873545
1600029D21Rik	Plek	0	M0039	0.0236534
1600029D21Rik	Mycs	0	M0039	0.00856641
1600029D21Rik	Ltbp2	0	M0039	0.0576567
1600029D21Rik	Mdk	0	M0039	0.260948
1600029D21Rik	Gsg1	0	M0039	0.0192815
1600029D21Rik	Ptges	0	M0039	0.0292341
1600029D21Rik	H2-Q7	0	M0039	0.0668839
1600029D21Rik	Vps52	0	M0039	0.0203335
1600029D21Rik	Olfr470	0	M0039	0.0521406
1600029D21Rik	Hcst	0	M0039	0.0161068
1600029D21Rik	Mrc1	0	M0039	0.0721649
1600029D21Rik	Adam34	0	M0039	0.0558499
1600029D21Rik	Pprc1	0	M0039	0.0343887
1600029D21Rik	Ubtf	0	M0039	0.0250779
1600029D21Rik	Ifi47	0	M0039	0.0132628
1600029D21Rik	1500009C09Rik	0	M0039	0.0478774
1600029D21Rik	C530028O21Rik	0	M0039	0.192031
1600029D21Rik	Cdkn2a	0	M0039	0.148254
1600029D21Rik	Fcgr1	0	M0039	0.0689234
1600029D21Rik	Oxtr	0	M0039	0.0443324
1600029D21Rik	Gal3st1	0	M0039	0.0731991
1600029D21Rik	Sema5a	0	M0039	0.0283124
1600029D21Rik	Olfr24	0	M0039	0.00898351
1600029D21Rik	Prosapip1	0	M0039	0.183046
1600029D21Rik	Adra2a	0	M0039	0.0163201
1600029D21Rik	Muc4	0	M0039	0.0215047
1600029D21Rik	Olfr729	0	M0039	0.0355994
1600029D21Rik	Clcn1	0	M0039	0.0650405
1600029D21Rik	Cabp5	0	M0039	0.155034
1600029D21Rik	Atp1a3	0	M0039	0.0589473
1600029D21Rik	Gas7	0	M0039	0.0974795
1600029D21Rik	Msx2	0	M0039	0.0577874
1600029D21Rik	BC013712	0	M0039	0.0395772
1600029D21Rik	Cd84	0	M0039	0.0365222
1600029D21Rik	Apod	0	M0039	0.10052
1600029D21Rik	G6pc2	0	M0039	0.0827394
1600029D21Rik	Gp49a	0	M0039	0.0414938
1600029D21Rik	Cnksr2	0	M0039	0.0210653
1600029D21Rik	Wrb	0	M0039	0.135011
1600029D21Rik	Cyp2b19	0	M0039	0.00914289
1600029D21Rik	Olfr975	0	M0039	0.013918
1600029D21Rik	Cybb	0	M0039	0.060873
1600029D21Rik	Pou2af1	0	M0039	0.0340431
1600029D21Rik	Traf2	0	M0039	0.0777356
1600029D21Rik	Pzp	0	M0039	0.0605807
1600029D21Rik	1810010H24Rik	0	M0039	0.0727241
1600029D21Rik	Adcy9	0	M0039	0.0111869
1600029D21Rik	Usp18	0	M0039	0.0219121
1600029D21Rik	Alg12	0	M0039	0.0652299
1600029D21Rik	Mx1	0	M0039	0.13096
1600029D21Rik	Myo1f	0	M0039	0.0920461
1600029D21Rik	Tbc1d12	0	M0039	0.0501194
1600029D21Rik	Akp3	0	M0039	0.0261421
1600029D21Rik	Cd48	0	M0039	0.0231685
1600029D21Rik	Pard6g	0	M0039	0.172561
1600029D21Rik	Tas2r105	0	M0039	0.0226627
1600029D21Rik	Sorl1	0	M0039	0.0687661
1600029D21Rik	Ccl28	0	M0039	0.0162556
1600029D21Rik	Cyp3a13	0	M0039	0.0603548
1600029D21Rik	Ptpro	0	M0039	0.0375509
1600029D21Rik	1700065I16Rik	0	M0039	0.00586945
1600029D21Rik	Rorb	0	M0039	0.0659255
1600029D21Rik	4933400C23	0	M0039	0.0225802
1600029D21Rik	4930550C17Rik	0	M0039	0.00797893
1600029D21Rik	Prrx2	0	M0039	0.171375
1600029D21Rik	Lrrc2	0	M0039	0.0064175
1600029D21Rik	Sardh	0	M0039	0.135083
1600029D21Rik	4930417G10Rik	0	M0039	0.0619934
1600029D21Rik	Kit	0	M0039	0.0391043
Ms4a4b	Cyp4f15	0	M0039	0.0439097
Ms4a4b	Cst7	0	M0039	0.107106
Ms4a4b	Lyl1	0	M0039	0.0324125
Ms4a4b	Ntn1	0	M0039	0.106954
Ms4a4b	Ptgfrn	0	M0039	0.153856
Ms4a4b	Serpinb13	0	M0039	0.149382
Ms4a4b	Mgst2	0	M0039	0.178855
Ms4a4b	Folr2	0	M0039	0.0863654
Ms4a4b	Nme4	0	M0039	0.188823
Ms4a4b	Hs6st1	0	M0039	0.0748653
Ms4a4b	C1qa	0	M0039	0.144019
Ms4a4b	Slfn4	0	M0039	0.110023
Ms4a4b	Rem2	0	M0039	0.047056
Ms4a4b	Gk2	0	M0039	0.0806784
Ms4a4b	Cd83	0	M0039	0.133349
Ms4a4b	Sc4mol	0	M0039	0.135863
Ms4a4b	Abp1	0	M0039	0.0545071
Ms4a4b	Cab39	0	M0039	0.0956912
Ms4a4b	Il10ra	0	M0039	0.147745
Ms4a4b	Trpv5	0	M0039	0.0513185
Ms4a4b	Exo1	0	M0039	0.0993578
Ms4a4b	Sppl3	0	M0039	0.0767744
Ms4a4b	Akr1c12	0	M0039	0.0942809
Ms4a4b	Dpys	0	M0039	0.0732836
Ms4a4b	Mill1	0	M0039	0.0274619
Ms4a4b	Tyrobp	0	M0039	0.117284
Ms4a4b	Itgb2	0	M0039	0.0869778
Ms4a4b	Kctd16	0	M0039	0.118336
Ms4a4b	Slc15a2	0	M0039	0.0673864
Ms4a4b	Gmip	0	M0039	0.112509
Ms4a4b	H2-DMb1	0	M0039	0.205182
Ms4a4b	Frzb	0	M0039	0.116721
Ms4a4b	Cdh16	0	M0039	0.0867512
Ms4a4b	Ifitm6	0	M0039	0.108268
Ms4a4b	4933405O20Rik	0	M0039	0.0396579
Ms4a4b	2010107G23Rik	0	M0039	0.168786
Ms4a4b	Csf3	0	M0039	0.119509
Ms4a4b	3110009E18Rik	0	M0039	0.0272261
Ms4a4b	1700093K21Rik	0	M0039	0.0546949
Ms4a4b	4833427G06Rik	0	M0039	0.0730219
Ms4a4b	Aox1	0	M0039	0.189319
Ms4a4b	Cdon	0	M0039	0.0823219
Ms4a4b	Chn1	0	M0039	0.175313
Ms4a4b	Mmp2	0	M0039	0.0721434
Ms4a4b	Cd79b	0	M0039	0.127148
Ms4a4b	Rest	0	M0039	0.110562
Ms4a4b	Tnnc2	0	M0039	0.0940025
Ms4a4b	Doc2g	0	M0039	0.0821787
Ms4a4b	Itgb7	0	M0039	0.168928
Ms4a4b	Slc6a18	0	M0039	0.0434835
Ms4a4b	Fmnl1	0	M0039	0.0634455
Ms4a4b	Irf7	0	M0039	0.0552194
Ms4a4b	Vnn1	0	M0039	0.11786
Ms4a4b	Pgc	0	M0039	0.0516991
Ms4a4b	Npl	0	M0039	0.0974374
Ms4a4b	Klhl6	0	M0039	0.164727
Ms4a4b	Olfr1504	0	M0039	0.0789606
Ms4a4b	Dok2	0	M0039	0.135756
Ms4a4b	Hpgd	0	M0039	0.0687747
Ms4a4b	Ly86	0	M0039	0.116282
Ms4a4b	Ropn1	0	M0039	0.0534492
Ms4a4b	Mak	0	M0039	0.110286
Ms4a4b	S100a3	0	M0039	0.0894495
Ms4a4b	H2-DMa	0	M0039	0.191834
Ms4a4b	Prss12	0	M0039	0.0765432
Ms4a4b	Bmper	0	M0039	0.108905
Ms4a4b	Zfp287	0	M0039	0.109874
Ms4a4b	Pik3cg	0	M0039	0.07685
Ms4a4b	Sfrp2	0	M0039	0.070565
Ms4a4b	Diap3	0	M0039	0.168082
Ms4a4b	Fdft1	0	M0039	0.029206
Ms4a4b	Slc35d1	0	M0039	0.109224
Ms4a4b	Col13a1	0	M0039	0.0574332
Ms4a4b	Cpa4	0	M0039	0.0258278
Ms4a4b	Sox11	0	M0039	0.0303238
Ms4a4b	1700011F03Rik	0	M0039	0.120774
Ms4a4b	Nova1	0	M0039	0.140822
Ms4a4b	Pcdhb13	0	M0039	0.0795428
Ms4a4b	Ms4a4d	0	M0039	0.0722194
Ms4a4b	Cdc6	0	M0039	0.0114681
Ms4a4b	Pln	0	M0039	0.041323
Ms4a4b	Alms1	0	M0039	0.134621
Ms4a4b	Dach2	0	M0039	0.10621
Ms4a4b	Rnf103	0	M0039	0.0731375
Ms4a4b	Fgd2	0	M0039	0.205968
Ms4a4b	Sdc3	0	M0039	0.11197
Ms4a4b	Col8a1	0	M0039	0.0831439
Ms4a4b	2210020M01Rik	0	M0039	0.145621
Ms4a4b	Chrna4	0	M0039	0.0869013
Ms4a4b	Drd1a	0	M0039	0.0580839
Ms4a4b	Slc9a9	0	M0039	0.0604804
Ms4a4b	Bpgm	0	M0039	0.11652
Ms4a4b	Slc15a3	0	M0039	0.0783975
Ms4a4b	Jrk	0	M0039	0.0747089
Ms4a4b	Kcnk5	0	M0039	0.0920189
Ms4a4b	Rgs18	0	M0039	0.0733391
Ms4a4b	AW146020	0	M0039	0.091708
Ms4a4b	Lcp1	0	M0039	0.129847
Ms4a4b	Oit3	0	M0039	0.101505
Ms4a4b	Ccr5	0	M0039	0.0869934
Ms4a4b	Foxo6	0	M0039	0.0510018
Ms4a4b	Sncaip	0	M0039	0.0864514
Ms4a4b	Csf1r	0	M0039	0.132898
Ms4a4b	Olig1	0	M0039	0.131097
Ms4a4b	Chst2	0	M0039	0.0724937
Ms4a4b	Ccl5	0	M0039	0.206122
Ms4a4b	Kbtbd10	0	M0039	0.07974
Ms4a4b	Tob2	0	M0039	0.0383568
Ms4a4b	Sertad3	0	M0039	0.108507
Ms4a4b	Tmie	0	M0039	0.101852
Ms4a4b	Pik3cd	0	M0039	0.150079
Ms4a4b	Lrrc4b	0	M0039	0.0507579
Ms4a4b	Grb10	0	M0039	0.174463
Ms4a4b	Olfr630	0	M0039	0.0173156
Ms4a4b	1190002N15Rik	0	M0039	0.0562928
Ms4a4b	Cd68	0	M0039	0.175248
Ms4a4b	Trem2	0	M0039	0.0724069
Ms4a4b	Ppfia4	0	M0039	0.166773
Ms4a4b	Hcrtr1	0	M0039	0.150966
Ms4a4b	9430091E24Rik	0	M0039	0.105526
Ms4a4b	Plek	0	M0039	0.103758
Ms4a4b	Mycs	0	M0039	0.0382309
Ms4a4b	Ltbp2	0	M0039	0.145645
Ms4a4b	Mdk	0	M0039	0.11559
Ms4a4b	Gsg1	0	M0039	0.0862623
Ms4a4b	Ptges	0	M0039	0.196204
Ms4a4b	H2-Q7	0	M0039	0.181253
Ms4a4b	Vps52	0	M0039	0.0819536
Ms4a4b	Olfr470	0	M0039	0.11992
Ms4a4b	Hcst	0	M0039	0.156989
Ms4a4b	Mrc1	0	M0039	0.100334
Ms4a4b	Adam34	0	M0039	0.0942797
Ms4a4b	Pprc1	0	M0039	0.0843345
Ms4a4b	Ubtf	0	M0039	0.0820899
Ms4a4b	Ifi47	0	M0039	0.112989
Ms4a4b	1500009C09Rik	0	M0039	0.0765796
Ms4a4b	C530028O21Rik	0	M0039	0.152007
Ms4a4b	Cdkn2a	0	M0039	0.117219
Ms4a4b	Fcgr1	0	M0039	0.156555
Ms4a4b	Oxtr	0	M0039	0.112675
Ms4a4b	Gal3st1	0	M0039	0.0998281
Ms4a4b	Sema5a	0	M0039	0.116532
Ms4a4b	Olfr24	0	M0039	0.0402465
Ms4a4b	Prosapip1	0	M0039	0.0995934
Ms4a4b	Adra2a	0	M0039	0.0530385
Ms4a4b	Muc4	0	M0039	0.0366803
Ms4a4b	Olfr729	0	M0039	0.0286576
Ms4a4b	Clcn1	0	M0039	0.105038
Ms4a4b	Cabp5	0	M0039	0.119571
Ms4a4b	Atp1a3	0	M0039	0.196187
Ms4a4b	Gas7	0	M0039	0.137088
Ms4a4b	Msx2	0	M0039	0.116019
Ms4a4b	BC013712	0	M0039	0.12447
Ms4a4b	Cd84	0	M0039	0.15047
Ms4a4b	Apod	0	M0039	0.0749886
Ms4a4b	G6pc2	0	M0039	0.113872
Ms4a4b	Gp49a	0	M0039	0.124385
Ms4a4b	Cnksr2	0	M0039	0.0801949
Ms4a4b	Wrb	0	M0039	0.214179
Ms4a4b	Cyp2b19	0	M0039	0.0462502
Ms4a4b	Olfr975	0	M0039	0.0334355
Ms4a4b	Cybb	0	M0039	0.149248
Ms4a4b	Pou2af1	0	M0039	0.111036
Ms4a4b	Traf2	0	M0039	0.0889335
Ms4a4b	Pzp	0	M0039	0.110918
Ms4a4b	1810010H24Rik	0	M0039	0.174781
Ms4a4b	Adcy9	0	M0039	0.0720153
Ms4a4b	Usp18	0	M0039	0.123527
Ms4a4b	Alg12	0	M0039	0.127316
Ms4a4b	Mx1	0	M0039	0.122648
Ms4a4b	Myo1f	0	M0039	0.229072
Ms4a4b	Tbc1d12	0	M0039	0.0735843
Ms4a4b	Akp3	0	M0039	0.0336389
Ms4a4b	Cd48	0	M0039	0.13376
Ms4a4b	Pard6g	0	M0039	0.0774635
Ms4a4b	Tas2r105	0	M0039	0.0309649
Ms4a4b	Sorl1	0	M0039	0.149619
Ms4a4b	Ccl28	0	M0039	0.0659022
Ms4a4b	Cyp3a13	0	M0039	0.183139
Ms4a4b	Ptpro	0	M0039	0.115991
Ms4a4b	1700065I16Rik	0	M0039	0.0161847
Ms4a4b	Rorb	0	M0039	0.0644549
Ms4a4b	4933400C23	0	M0039	0.084153
Ms4a4b	4930550C17Rik	0	M0039	0.0350968
Ms4a4b	Prrx2	0	M0039	0.118951
Ms4a4b	Lrrc2	0	M0039	0.0704724
Ms4a4b	Sardh	0	M0039	0.156332
Ms4a4b	4930417G10Rik	0	M0039	0.106187
Ms4a4b	Kit	0	M0039	0.0786115
Cyp4f15	Cst7	0	M0039	0.021432
Cyp4f15	Lyl1	0	M0039	0.0127677
Cyp4f15	Ntn1	0	M0039	0.0354413
Cyp4f15	Ptgfrn	0	M0039	0.0264292
Cyp4f15	Serpinb13	0	M0039	0.0202802
Cyp4f15	Mgst2	0	M0039	0.057387
Cyp4f15	Folr2	0	M0039	0.00854408
Cyp4f15	Nme4	0	M0039	0.023077
Cyp4f15	Hs6st1	0	M0039	0.0487481
Cyp4f15	C1qa	0	M0039	0.0122096
Cyp4f15	Slfn4	0	M0039	0.0402557
Cyp4f15	Rem2	0	M0039	0.0179067
Cyp4f15	Gk2	0	M0039	0.0291463
Cyp4f15	Cd83	0	M0039	0.0235754
Cyp4f15	Sc4mol	0	M0039	0.0259244
Cyp4f15	Abp1	0	M0039	0.0713455
Cyp4f15	Cab39	0	M0039	0.0448312
Cyp4f15	Il10ra	0	M0039	0.0338264
Cyp4f15	Trpv5	0	M0039	0.0654404
Cyp4f15	Exo1	0	M0039	0.0481372
Cyp4f15	Sppl3	0	M0039	0.030994
Cyp4f15	Akr1c12	0	M0039	0.0293978
Cyp4f15	Dpys	0	M0039	0.104784
Cyp4f15	Mill1	0	M0039	0.0299405
Cyp4f15	Tyrobp	0	M0039	0.00914863
Cyp4f15	Itgb2	0	M0039	0.0159982
Cyp4f15	Kctd16	0	M0039	0.0109689
Cyp4f15	Slc15a2	0	M0039	0.00919041
Cyp4f15	Gmip	0	M0039	0.0406288
Cyp4f15	H2-DMb1	0	M0039	0.024614
Cyp4f15	Frzb	0	M0039	0.0286955
Cyp4f15	Cdh16	0	M0039	0.0236668
Cyp4f15	Ifitm6	0	M0039	0.0263914
Cyp4f15	4933405O20Rik	0	M0039	0.0611318
Cyp4f15	2010107G23Rik	0	M0039	0.0285908
Cyp4f15	Csf3	0	M0039	0.028569
Cyp4f15	3110009E18Rik	0	M0039	0.0358108
Cyp4f15	1700093K21Rik	0	M0039	0.0885276
Cyp4f15	4833427G06Rik	0	M0039	0.0174357
Cyp4f15	Aox1	0	M0039	0.0404675
Cyp4f15	Cdon	0	M0039	0.0262839
Cyp4f15	Chn1	0	M0039	0.0567946
Cyp4f15	Mmp2	0	M0039	0.027218
Cyp4f15	Cd79b	0	M0039	0.00770611
Cyp4f15	Rest	0	M0039	0.0264847
Cyp4f15	Tnnc2	0	M0039	0.0112853
Cyp4f15	Doc2g	0	M0039	0.00779136
Cyp4f15	Itgb7	0	M0039	0.0267018
Cyp4f15	Slc6a18	0	M0039	0.0403739
Cyp4f15	Fmnl1	0	M0039	0.0584426
Cyp4f15	Irf7	0	M0039	0.00912958
Cyp4f15	Vnn1	0	M0039	0.0373246
Cyp4f15	Pgc	0	M0039	0.00789387
Cyp4f15	Npl	0	M0039	0.0317827
Cyp4f15	Klhl6	0	M0039	0.043179
Cyp4f15	Olfr1504	0	M0039	0.0238716
Cyp4f15	Dok2	0	M0039	0.00942409
Cyp4f15	Hpgd	0	M0039	0.0367483
Cyp4f15	Ly86	0	M0039	0.0223998
Cyp4f15	Ropn1	0	M0039	0.0284121
Cyp4f15	Mak	0	M0039	0.0371731
Cyp4f15	S100a3	0	M0039	0.1109
Cyp4f15	H2-DMa	0	M0039	0.0115797
Cyp4f15	Prss12	0	M0039	0.0431499
Cyp4f15	Bmper	0	M0039	0.0216144
Cyp4f15	Zfp287	0	M0039	0.0237124
Cyp4f15	Pik3cg	0	M0039	0.0300111
Cyp4f15	Sfrp2	0	M0039	0.0308651
Cyp4f15	Diap3	0	M0039	0.0153233
Cyp4f15	Fdft1	0	M0039	0.0459598
Cyp4f15	Slc35d1	0	M0039	0.0433512
Cyp4f15	Col13a1	0	M0039	0.0277436
Cyp4f15	Cpa4	0	M0039	0.0255142
Cyp4f15	Sox11	0	M0039	0.0200462
Cyp4f15	1700011F03Rik	0	M0039	0.00510506
Cyp4f15	Nova1	0	M0039	0.0471501
Cyp4f15	Pcdhb13	0	M0039	0.0181276
Cyp4f15	Ms4a4d	0	M0039	0.0391873
Cyp4f15	Cdc6	0	M0039	0.0185584
Cyp4f15	Pln	0	M0039	0.00683649
Cyp4f15	Alms1	0	M0039	0.0283721
Cyp4f15	Dach2	0	M0039	0.0453922
Cyp4f15	Rnf103	0	M0039	0.0266999
Cyp4f15	Fgd2	0	M0039	0.0606073
Cyp4f15	Sdc3	0	M0039	0.00895599
Cyp4f15	Col8a1	0	M0039	0.0232586
Cyp4f15	2210020M01Rik	0	M0039	0.0299002
Cyp4f15	Chrna4	0	M0039	0.0224821
Cyp4f15	Drd1a	0	M0039	0.0433893
Cyp4f15	Slc9a9	0	M0039	0.0223295
Cyp4f15	Bpgm	0	M0039	0.023455
Cyp4f15	Slc15a3	0	M0039	0.0377274
Cyp4f15	Jrk	0	M0039	0.0394288
Cyp4f15	Kcnk5	0	M0039	0.019851
Cyp4f15	Rgs18	0	M0039	0.0225211
Cyp4f15	AW146020	0	M0039	0.0358072
Cyp4f15	Lcp1	0	M0039	0.00852363
Cyp4f15	Oit3	0	M0039	0.0522123
Cyp4f15	Ccr5	0	M0039	0.0134784
Cyp4f15	Foxo6	0	M0039	0.0070374
Cyp4f15	Sncaip	0	M0039	0.0111275
Cyp4f15	Csf1r	0	M0039	0.0217931
Cyp4f15	Olig1	0	M0039	0.0275817
Cyp4f15	Chst2	0	M0039	0.0346251
Cyp4f15	Ccl5	0	M0039	0.0181332
Cyp4f15	Kbtbd10	0	M0039	0.0167739
Cyp4f15	Tob2	0	M0039	0.0347807
Cyp4f15	Sertad3	0	M0039	0.016709
Cyp4f15	Tmie	0	M0039	0.0456119
Cyp4f15	Pik3cd	0	M0039	0.0184894
Cyp4f15	Lrrc4b	0	M0039	0.013872
Cyp4f15	Grb10	0	M0039	0.0440157
Cyp4f15	Olfr630	0	M0039	0.0210978
Cyp4f15	1190002N15Rik	0	M0039	0.0517071
Cyp4f15	Cd68	0	M0039	0.026785
Cyp4f15	Trem2	0	M0039	0.0193422
Cyp4f15	Ppfia4	0	M0039	0.0572547
Cyp4f15	Hcrtr1	0	M0039	0.03821
Cyp4f15	9430091E24Rik	0	M0039	0.113167
Cyp4f15	Plek	0	M0039	0.00523098
Cyp4f15	Mycs	0	M0039	0.0896767
Cyp4f15	Ltbp2	0	M0039	0.0156588
Cyp4f15	Mdk	0	M0039	0.0389906
Cyp4f15	Gsg1	0	M0039	0.0185182
Cyp4f15	Ptges	0	M0039	0.0359519
Cyp4f15	H2-Q7	0	M0039	0.0324698
Cyp4f15	Vps52	0	M0039	0.0423808
Cyp4f15	Olfr470	0	M0039	0.0102955
Cyp4f15	Hcst	0	M0039	0.0144438
Cyp4f15	Mrc1	0	M0039	0.0115013
Cyp4f15	Adam34	0	M0039	0.00391602
Cyp4f15	Pprc1	0	M0039	0.0209866
Cyp4f15	Ubtf	0	M0039	0.0556753
Cyp4f15	Ifi47	0	M0039	0.0135178
Cyp4f15	1500009C09Rik	0	M0039	0.0700626
Cyp4f15	C530028O21Rik	0	M0039	0.0471097
Cyp4f15	Cdkn2a	0	M0039	0.023852
Cyp4f15	Fcgr1	0	M0039	0.0344534
Cyp4f15	Oxtr	0	M0039	0.0537892
Cyp4f15	Gal3st1	0	M0039	0.0309522
Cyp4f15	Sema5a	0	M0039	0.0344393
Cyp4f15	Olfr24	0	M0039	0.0249826
Cyp4f15	Prosapip1	0	M0039	0.0325314
Cyp4f15	Adra2a	0	M0039	0.022917
Cyp4f15	Muc4	0	M0039	0.00503641
Cyp4f15	Olfr729	0	M0039	0.0233436
Cyp4f15	Clcn1	0	M0039	0.0225288
Cyp4f15	Cabp5	0	M0039	0.0419539
Cyp4f15	Atp1a3	0	M0039	0.0419442
Cyp4f15	Gas7	0	M0039	0.00952367
Cyp4f15	Msx2	0	M0039	0.0254976
Cyp4f15	BC013712	0	M0039	0.0366829
Cyp4f15	Cd84	0	M0039	0.0154897
Cyp4f15	Apod	0	M0039	0.0170552
Cyp4f15	G6pc2	0	M0039	0.0489264
Cyp4f15	Gp49a	0	M0039	0.0129724
Cyp4f15	Cnksr2	0	M0039	0.0293918
Cyp4f15	Wrb	0	M0039	0.0544937
Cyp4f15	Cyp2b19	0	M0039	0.0914178
Cyp4f15	Olfr975	0	M0039	0.00456725
Cyp4f15	Cybb	0	M0039	0.0181909
Cyp4f15	Pou2af1	0	M0039	0.0165112
Cyp4f15	Traf2	0	M0039	0.0134852
Cyp4f15	Pzp	0	M0039	0.0248148
Cyp4f15	1810010H24Rik	0	M0039	0.014232
Cyp4f15	Adcy9	0	M0039	0.0265882
Cyp4f15	Usp18	0	M0039	0.015396
Cyp4f15	Alg12	0	M0039	0.0713841
Cyp4f15	Mx1	0	M0039	0.0734695
Cyp4f15	Myo1f	0	M0039	0.0377656
Cyp4f15	Tbc1d12	0	M0039	0.106127
Cyp4f15	Akp3	0	M0039	0.0334187
Cyp4f15	Cd48	0	M0039	0.0519099
Cyp4f15	Pard6g	0	M0039	0.0773642
Cyp4f15	Tas2r105	0	M0039	0.128755
Cyp4f15	Sorl1	0	M0039	0.0402972
Cyp4f15	Ccl28	0	M0039	0.00736522
Cyp4f15	Cyp3a13	0	M0039	0.0388807
Cyp4f15	Ptpro	0	M0039	0.0190754
Cyp4f15	1700065I16Rik	0	M0039	0.0726456
Cyp4f15	Rorb	0	M0039	0.072601
Cyp4f15	4933400C23	0	M0039	0.0470284
Cyp4f15	4930550C17Rik	0	M0039	0.0887623
Cyp4f15	Prrx2	0	M0039	0.0401265
Cyp4f15	Lrrc2	0	M0039	0.00581763
Cyp4f15	Sardh	0	M0039	0.0289981
Cyp4f15	4930417G10Rik	0	M0039	0.0815205
Cyp4f15	Kit	0	M0039	0.00771419
Cst7	Lyl1	0	M0039	0.0209269
Cst7	Ntn1	0	M0039	0.090067
Cst7	Ptgfrn	0	M0039	0.164064
Cst7	Serpinb13	0	M0039	0.0570214
Cst7	Mgst2	0	M0039	0.0716037
Cst7	Folr2	0	M0039	0.0463107
Cst7	Nme4	0	M0039	0.111742
Cst7	Hs6st1	0	M0039	0.0201153
Cst7	C1qa	0	M0039	0.0839474
Cst7	Slfn4	0	M0039	0.118202
Cst7	Rem2	0	M0039	0.0246405
Cst7	Gk2	0	M0039	0.108328
Cst7	Cd83	0	M0039	0.0414423
Cst7	Sc4mol	0	M0039	0.0947082
Cst7	Abp1	0	M0039	0.0425697
Cst7	Cab39	0	M0039	0.156434
Cst7	Il10ra	0	M0039	0.0649515
Cst7	Trpv5	0	M0039	0.08255
Cst7	Exo1	0	M0039	0.131507
Cst7	Sppl3	0	M0039	0.106354
Cst7	Akr1c12	0	M0039	0.179928
Cst7	Dpys	0	M0039	0.0441577
Cst7	Mill1	0	M0039	0.0350717
Cst7	Tyrobp	0	M0039	0.120456
Cst7	Itgb2	0	M0039	0.106306
Cst7	Kctd16	0	M0039	0.168712
Cst7	Slc15a2	0	M0039	0.0229606
Cst7	Gmip	0	M0039	0.0386239
Cst7	H2-DMb1	0	M0039	0.12196
Cst7	Frzb	0	M0039	0.0270741
Cst7	Cdh16	0	M0039	0.0356827
Cst7	Ifitm6	0	M0039	0.0797426
Cst7	4933405O20Rik	0	M0039	0.0291075
Cst7	2010107G23Rik	0	M0039	0.154453
Cst7	Csf3	0	M0039	0.10634
Cst7	3110009E18Rik	0	M0039	0.0514709
Cst7	1700093K21Rik	0	M0039	0.0196915
Cst7	4833427G06Rik	0	M0039	0.0557183
Cst7	Aox1	0	M0039	0.0931222
Cst7	Cdon	0	M0039	0.0613236
Cst7	Chn1	0	M0039	0.0684895
Cst7	Mmp2	0	M0039	0.0187311
Cst7	Cd79b	0	M0039	0.0968859
Cst7	Rest	0	M0039	0.179259
Cst7	Tnnc2	0	M0039	0.163229
Cst7	Doc2g	0	M0039	0.115046
Cst7	Itgb7	0	M0039	0.106269
Cst7	Slc6a18	0	M0039	0.026044
Cst7	Fmnl1	0	M0039	0.0701608
Cst7	Irf7	0	M0039	0.170233
Cst7	Vnn1	0	M0039	0.0591784
Cst7	Pgc	0	M0039	0.14383
Cst7	Npl	0	M0039	0.0860301
Cst7	Klhl6	0	M0039	0.0867299
Cst7	Olfr1504	0	M0039	0.0845978
Cst7	Dok2	0	M0039	0.0631496
Cst7	Hpgd	0	M0039	0.0718971
Cst7	Ly86	0	M0039	0.160416
Cst7	Ropn1	0	M0039	0.142632
Cst7	Mak	0	M0039	0.0954973
Cst7	S100a3	0	M0039	0.0566329
Cst7	H2-DMa	0	M0039	0.120436
Cst7	Prss12	0	M0039	0.0457027
Cst7	Bmper	0	M0039	0.0312415
Cst7	Zfp287	0	M0039	0.028209
Cst7	Pik3cg	0	M0039	0.0979459
Cst7	Sfrp2	0	M0039	0.0138797
Cst7	Diap3	0	M0039	0.0967874
Cst7	Fdft1	0	M0039	0.0669927
Cst7	Slc35d1	0	M0039	0.0499188
Cst7	Col13a1	0	M0039	0.0585017
Cst7	Cpa4	0	M0039	0.0793869
Cst7	Sox11	0	M0039	0.056824
Cst7	1700011F03Rik	0	M0039	0.059779
Cst7	Nova1	0	M0039	0.0875301
Cst7	Pcdhb13	0	M0039	0.0159733
Cst7	Ms4a4d	0	M0039	0.0195294
Cst7	Cdc6	0	M0039	0.0137515
Cst7	Pln	0	M0039	0.0979421
Cst7	Alms1	0	M0039	0.0457898
Cst7	Dach2	0	M0039	0.0854555
Cst7	Rnf103	0	M0039	0.0645154
Cst7	Fgd2	0	M0039	0.102728
Cst7	Sdc3	0	M0039	0.0871282
Cst7	Col8a1	0	M0039	0.0209316
Cst7	2210020M01Rik	0	M0039	0.0762205
Cst7	Chrna4	0	M0039	0.0677921
Cst7	Drd1a	0	M0039	0.0391068
Cst7	Slc9a9	0	M0039	0.0355901
Cst7	Bpgm	0	M0039	0.0439025
Cst7	Slc15a3	0	M0039	0.037956
Cst7	Jrk	0	M0039	0.0156657
Cst7	Kcnk5	0	M0039	0.061629
Cst7	Rgs18	0	M0039	0.0407594
Cst7	AW146020	0	M0039	0.12832
Cst7	Lcp1	0	M0039	0.1164
Cst7	Oit3	0	M0039	0.122064
Cst7	Ccr5	0	M0039	0.0749254
Cst7	Foxo6	0	M0039	0.0262347
Cst7	Sncaip	0	M0039	0.0671929
Cst7	Csf1r	0	M0039	0.0890207
Cst7	Olig1	0	M0039	0.0980751
Cst7	Chst2	0	M0039	0.0669579
Cst7	Ccl5	0	M0039	0.103817
Cst7	Kbtbd10	0	M0039	0.14988
Cst7	Tob2	0	M0039	0.0611043
Cst7	Sertad3	0	M0039	0.0871167
Cst7	Tmie	0	M0039	0.102537
Cst7	Pik3cd	0	M0039	0.0482252
Cst7	Lrrc4b	0	M0039	0.0432322
Cst7	Grb10	0	M0039	0.0965921
Cst7	Olfr630	0	M0039	0.0280281
Cst7	1190002N15Rik	0	M0039	0.113978
Cst7	Cd68	0	M0039	0.117209
Cst7	Trem2	0	M0039	0.0538933
Cst7	Ppfia4	0	M0039	0.0498853
Cst7	Hcrtr1	0	M0039	0.0414471
Cst7	9430091E24Rik	0	M0039	0.0331155
Cst7	Plek	0	M0039	0.0658457
Cst7	Mycs	0	M0039	0.0462113
Cst7	Ltbp2	0	M0039	0.0949146
Cst7	Mdk	0	M0039	0.0328747
Cst7	Gsg1	0	M0039	0.146473
Cst7	Ptges	0	M0039	0.0748087
Cst7	H2-Q7	0	M0039	0.126612
Cst7	Vps52	0	M0039	0.105211
Cst7	Olfr470	0	M0039	0.127565
Cst7	Hcst	0	M0039	0.12965
Cst7	Mrc1	0	M0039	0.0430867
Cst7	Adam34	0	M0039	0.0806517
Cst7	Pprc1	0	M0039	0.148258
Cst7	Ubtf	0	M0039	0.102387
Cst7	Ifi47	0	M0039	0.185699
Cst7	1500009C09Rik	0	M0039	0.0815054
Cst7	C530028O21Rik	0	M0039	0.0336235
Cst7	Cdkn2a	0	M0039	0.0528596
Cst7	Fcgr1	0	M0039	0.147791
Cst7	Oxtr	0	M0039	0.0963062
Cst7	Gal3st1	0	M0039	0.0234714
Cst7	Sema5a	0	M0039	0.227828
Cst7	Olfr24	0	M0039	0.11817
Cst7	Prosapip1	0	M0039	0.0359037
Cst7	Adra2a	0	M0039	0.120883
Cst7	Muc4	0	M0039	0.109362
Cst7	Olfr729	0	M0039	0.023548
Cst7	Clcn1	0	M0039	0.10308
Cst7	Cabp5	0	M0039	0.0374985
Cst7	Atp1a3	0	M0039	0.0885983
Cst7	Gas7	0	M0039	0.0519956
Cst7	Msx2	0	M0039	0.0952025
Cst7	BC013712	0	M0039	0.197049
Cst7	Cd84	0	M0039	0.07556
Cst7	Apod	0	M0039	0.0169292
Cst7	G6pc2	0	M0039	0.0436659
Cst7	Gp49a	0	M0039	0.0581469
Cst7	Cnksr2	0	M0039	0.163101
Cst7	Wrb	0	M0039	0.104496
Cst7	Cyp2b19	0	M0039	0.0524191
Cst7	Olfr975	0	M0039	0.138923
Cst7	Cybb	0	M0039	0.100662
Cst7	Pou2af1	0	M0039	0.0809951
Cst7	Traf2	0	M0039	0.0307555
Cst7	Pzp	0	M0039	0.107898
Cst7	1810010H24Rik	0	M0039	0.0553932
Cst7	Adcy9	0	M0039	0.128079
Cst7	Usp18	0	M0039	0.122519
Cst7	Alg12	0	M0039	0.0506039
Cst7	Mx1	0	M0039	0.0830152
Cst7	Myo1f	0	M0039	0.127113
Cst7	Tbc1d12	0	M0039	0.0271877
Cst7	Akp3	0	M0039	0.058209
Cst7	Cd48	0	M0039	0.183029
Cst7	Pard6g	0	M0039	0.0228311
Cst7	Tas2r105	0	M0039	0.0115518
Cst7	Sorl1	0	M0039	0.200641
Cst7	Ccl28	0	M0039	0.110281
Cst7	Cyp3a13	0	M0039	0.155599
Cst7	Ptpro	0	M0039	0.0766047
Cst7	1700065I16Rik	0	M0039	0.0220358
Cst7	Rorb	0	M0039	0.0326752
Cst7	4933400C23	0	M0039	0.0742281
Cst7	4930550C17Rik	0	M0039	0.0582944
Cst7	Prrx2	0	M0039	0.0345496
Cst7	Lrrc2	0	M0039	0.143145
Cst7	Sardh	0	M0039	0.113976
Cst7	4930417G10Rik	0	M0039	0.0574038
Cst7	Kit	0	M0039	0.0950392
Lyl1	Ntn1	0	M0039	0.00450025
Lyl1	Ptgfrn	0	M0039	0.022767
Lyl1	Serpinb13	0	M0039	0.0198335
Lyl1	Mgst2	0	M0039	0.0258082
Lyl1	Folr2	0	M0039	0.0487854
Lyl1	Nme4	0	M0039	0.0285744
Lyl1	Hs6st1	0	M0039	0.0188124
Lyl1	C1qa	0	M0039	0.0439516
Lyl1	Slfn4	0	M0039	0.012892
Lyl1	Rem2	0	M0039	0.0286298
Lyl1	Gk2	0	M0039	0.0313129
Lyl1	Cd83	0	M0039	0.0193609
Lyl1	Sc4mol	0	M0039	0.0354575
Lyl1	Abp1	0	M0039	0.0211123
Lyl1	Cab39	0	M0039	0.0371582
Lyl1	Il10ra	0	M0039	0.0262029
Lyl1	Trpv5	0	M0039	0.0272938
Lyl1	Exo1	0	M0039	0.0120258
Lyl1	Sppl3	0	M0039	0.032133
Lyl1	Akr1c12	0	M0039	0.00608075
Lyl1	Dpys	0	M0039	0.0313694
Lyl1	Mill1	0	M0039	0.0931433
Lyl1	Tyrobp	0	M0039	0.0409564
Lyl1	Itgb2	0	M0039	0.0386336
Lyl1	Kctd16	0	M0039	0.0142248
Lyl1	Slc15a2	0	M0039	0.0246771
Lyl1	Gmip	0	M0039	0.0260765
Lyl1	H2-DMb1	0	M0039	0.0407817
Lyl1	Frzb	0	M0039	0.023617
Lyl1	Cdh16	0	M0039	0.0298265
Lyl1	Ifitm6	0	M0039	0.0514702
Lyl1	4933405O20Rik	0	M0039	0.0360502
Lyl1	2010107G23Rik	0	M0039	0.00975801
Lyl1	Csf3	0	M0039	0.0135518
Lyl1	3110009E18Rik	0	M0039	0.0331863
Lyl1	1700093K21Rik	0	M0039	0.0263216
Lyl1	4833427G06Rik	0	M0039	0.0127548
Lyl1	Aox1	0	M0039	0.0170474
Lyl1	Cdon	0	M0039	0.0627209
Lyl1	Chn1	0	M0039	0.011602
Lyl1	Mmp2	0	M0039	0.0625373
Lyl1	Cd79b	0	M0039	0.00983829
Lyl1	Rest	0	M0039	0.00824443
Lyl1	Tnnc2	0	M0039	0.00438743
Lyl1	Doc2g	0	M0039	0.0405685
Lyl1	Itgb7	0	M0039	0.0451315
Lyl1	Slc6a18	0	M0039	0.0303414
Lyl1	Fmnl1	0	M0039	0.0430614
Lyl1	Irf7	0	M0039	0.0286846
Lyl1	Vnn1	0	M0039	0.0135669
Lyl1	Pgc	0	M0039	0.0206845
Lyl1	Npl	0	M0039	0.0295439
Lyl1	Klhl6	0	M0039	0.00771686
Lyl1	Olfr1504	0	M0039	0.0313555
Lyl1	Dok2	0	M0039	0.0486749
Lyl1	Hpgd	0	M0039	0.0229172
Lyl1	Ly86	0	M0039	0.0491025
Lyl1	Ropn1	0	M0039	0.00596958
Lyl1	Mak	0	M0039	0.0407492
Lyl1	S100a3	0	M0039	0.0090822
Lyl1	H2-DMa	0	M0039	0.0109443
Lyl1	Prss12	0	M0039	0.00875126
Lyl1	Bmper	0	M0039	0.0401214
Lyl1	Zfp287	0	M0039	0.00727608
Lyl1	Pik3cg	0	M0039	0.0205095
Lyl1	Sfrp2	0	M0039	0.0165743
Lyl1	Diap3	0	M0039	0.0310114
Lyl1	Fdft1	0	M0039	0.0150162
Lyl1	Slc35d1	0	M0039	0.0222101
Lyl1	Col13a1	0	M0039	0.0607146
Lyl1	Cpa4	0	M0039	0.00354278
Lyl1	Sox11	0	M0039	0.113628
Lyl1	1700011F03Rik	0	M0039	0.0238112
Lyl1	Nova1	0	M0039	0.00929361
Lyl1	Pcdhb13	0	M0039	0.0340328
Lyl1	Ms4a4d	0	M0039	0.0749798
Lyl1	Cdc6	0	M0039	0.102384
Lyl1	Pln	0	M0039	0.0196821
Lyl1	Alms1	0	M0039	0.0234636
Lyl1	Dach2	0	M0039	0.00205674
Lyl1	Rnf103	0	M0039	0.00784743
Lyl1	Fgd2	0	M0039	0.0459683
Lyl1	Sdc3	0	M0039	0.0295036
Lyl1	Col8a1	0	M0039	0.0742706
Lyl1	2210020M01Rik	0	M0039	0.0660685
Lyl1	Chrna4	0	M0039	0.019912
Lyl1	Drd1a	0	M0039	0.0256136
Lyl1	Slc9a9	0	M0039	0.0383514
Lyl1	Bpgm	0	M0039	0.0341266
Lyl1	Slc15a3	0	M0039	0.043427
Lyl1	Jrk	0	M0039	0.0139625
Lyl1	Kcnk5	0	M0039	0.0367185
Lyl1	Rgs18	0	M0039	0.0304353
Lyl1	AW146020	0	M0039	0.0074231
Lyl1	Lcp1	0	M0039	0.0378302
Lyl1	Oit3	0	M0039	0.0171409
Lyl1	Ccr5	0	M0039	0.0465272
Lyl1	Foxo6	0	M0039	0.0336192
Lyl1	Sncaip	0	M0039	0.0332197
Lyl1	Csf1r	0	M0039	0.0481225
Lyl1	Olig1	0	M0039	0.0139058
Lyl1	Chst2	0	M0039	0.0128417
Lyl1	Ccl5	0	M0039	0.0340502
Lyl1	Kbtbd10	0	M0039	0.0114953
Lyl1	Tob2	0	M0039	0.0191964
Lyl1	Sertad3	0	M0039	0.0230308
Lyl1	Tmie	0	M0039	0.0196328
Lyl1	Pik3cd	0	M0039	0.0533031
Lyl1	Lrrc4b	0	M0039	0.0340947
Lyl1	Grb10	0	M0039	0.00568276
Lyl1	Olfr630	0	M0039	0.0197028
Lyl1	1190002N15Rik	0	M0039	0.00972604
Lyl1	Cd68	0	M0039	0.0781044
Lyl1	Trem2	0	M0039	0.104347
Lyl1	Ppfia4	0	M0039	0.025033
Lyl1	Hcrtr1	0	M0039	0.0241786
Lyl1	9430091E24Rik	0	M0039	0.0239691
Lyl1	Plek	0	M0039	0.0341351
Lyl1	Mycs	0	M0039	0.0123325
Lyl1	Ltbp2	0	M0039	0.016115
Lyl1	Mdk	0	M0039	0.0569226
Lyl1	Gsg1	0	M0039	0.00641737
Lyl1	Ptges	0	M0039	0.0102048
Lyl1	H2-Q7	0	M0039	0.0275456
Lyl1	Vps52	0	M0039	0.0130882
Lyl1	Olfr470	0	M0039	0.0155912
Lyl1	Hcst	0	M0039	0.0322747
Lyl1	Mrc1	0	M0039	0.0558982
Lyl1	Adam34	0	M0039	0.0452277
Lyl1	Pprc1	0	M0039	0.0106664
Lyl1	Ubtf	0	M0039	0.0598503
Lyl1	Ifi47	0	M0039	0.0126383
Lyl1	1500009C09Rik	0	M0039	0.0291983
Lyl1	C530028O21Rik	0	M0039	0.0161815
Lyl1	Cdkn2a	0	M0039	0.029882
Lyl1	Fcgr1	0	M0039	0.0720104
Lyl1	Oxtr	0	M0039	0.0212378
Lyl1	Gal3st1	0	M0039	0.0517444
Lyl1	Sema5a	0	M0039	0.0291257
Lyl1	Olfr24	0	M0039	0.0208005
Lyl1	Prosapip1	0	M0039	0.0132845
Lyl1	Adra2a	0	M0039	0.0264285
Lyl1	Muc4	0	M0039	0.0281071
Lyl1	Olfr729	0	M0039	0.0673818
Lyl1	Clcn1	0	M0039	0.0145516
Lyl1	Cabp5	0	M0039	0.0121608
Lyl1	Atp1a3	0	M0039	0.0215461
Lyl1	Gas7	0	M0039	0.0313447
Lyl1	Msx2	0	M0039	0.00863968
Lyl1	BC013712	0	M0039	0.0213525
Lyl1	Cd84	0	M0039	0.0307827
Lyl1	Apod	0	M0039	0.0574682
Lyl1	G6pc2	0	M0039	0.0441621
Lyl1	Gp49a	0	M0039	0.0406595
Lyl1	Cnksr2	0	M0039	0.00626227
Lyl1	Wrb	0	M0039	0.0326131
Lyl1	Cyp2b19	0	M0039	0.0271399
Lyl1	Olfr975	0	M0039	0.0214444
Lyl1	Cybb	0	M0039	0.0402657
Lyl1	Pou2af1	0	M0039	0.02754
Lyl1	Traf2	0	M0039	0.020908
Lyl1	Pzp	0	M0039	0.0166514
Lyl1	1810010H24Rik	0	M0039	0.0213393
Lyl1	Adcy9	0	M0039	0.0439888
Lyl1	Usp18	0	M0039	0.00990615
Lyl1	Alg12	0	M0039	0.0158506
Lyl1	Mx1	0	M0039	0.0183074
Lyl1	Myo1f	0	M0039	0.0358872
Lyl1	Tbc1d12	0	M0039	0.0287358
Lyl1	Akp3	0	M0039	0.00752776
Lyl1	Cd48	0	M0039	0.0301014
Lyl1	Pard6g	0	M0039	0.0390301
Lyl1	Tas2r105	0	M0039	0.013626
Lyl1	Sorl1	0	M0039	0.0297424
Lyl1	Ccl28	0	M0039	0.0141475
Lyl1	Cyp3a13	0	M0039	0.0234459
Lyl1	Ptpro	0	M0039	0.0466236
Lyl1	1700065I16Rik	0	M0039	0.0109193
Lyl1	Rorb	0	M0039	0.0405695
Lyl1	4933400C23	0	M0039	0.013209
Lyl1	4930550C17Rik	0	M0039	0.0115882
Lyl1	Prrx2	0	M0039	0.0109888
Lyl1	Lrrc2	0	M0039	0.0130309
Lyl1	Sardh	0	M0039	0.015342
Lyl1	4930417G10Rik	0	M0039	0.00526556
Lyl1	Kit	0	M0039	0.00882088
Ntn1	Ptgfrn	0	M0039	0.117523
Ntn1	Serpinb13	0	M0039	0.0917828
Ntn1	Mgst2	0	M0039	0.0823929
Ntn1	Folr2	0	M0039	0.0349425
Ntn1	Nme4	0	M0039	0.0882809
Ntn1	Hs6st1	0	M0039	0.0827571
Ntn1	C1qa	0	M0039	0.049245
Ntn1	Slfn4	0	M0039	0.104137
Ntn1	Rem2	0	M0039	0.0388737
Ntn1	Gk2	0	M0039	0.03441
Ntn1	Cd83	0	M0039	0.0325721
Ntn1	Sc4mol	0	M0039	0.0242025
Ntn1	Abp1	0	M0039	0.0328661
Ntn1	Cab39	0	M0039	0.119867
Ntn1	Il10ra	0	M0039	0.0652924
Ntn1	Trpv5	0	M0039	0.0463198
Ntn1	Exo1	0	M0039	0.082364
Ntn1	Sppl3	0	M0039	0.0349108
Ntn1	Akr1c12	0	M0039	0.131141
Ntn1	Dpys	0	M0039	0.0926733
Ntn1	Mill1	0	M0039	0.00950606
Ntn1	Tyrobp	0	M0039	0.038126
Ntn1	Itgb2	0	M0039	0.0184356
Ntn1	Kctd16	0	M0039	0.0770518
Ntn1	Slc15a2	0	M0039	0.00999152
Ntn1	Gmip	0	M0039	0.109332
Ntn1	H2-DMb1	0	M0039	0.0849198
Ntn1	Frzb	0	M0039	0.0488931
Ntn1	Cdh16	0	M0039	0.0318874
Ntn1	Ifitm6	0	M0039	0.0518655
Ntn1	4933405O20Rik	0	M0039	0.0129093
Ntn1	2010107G23Rik	0	M0039	0.165466
Ntn1	Csf3	0	M0039	0.0674048
Ntn1	3110009E18Rik	0	M0039	0.0133694
Ntn1	1700093K21Rik	0	M0039	0.0208883
Ntn1	4833427G06Rik	0	M0039	0.0633606
Ntn1	Aox1	0	M0039	0.148073
Ntn1	Cdon	0	M0039	0.0741983
Ntn1	Chn1	0	M0039	0.127942
Ntn1	Mmp2	0	M0039	0.0415168
Ntn1	Cd79b	0	M0039	0.033599
Ntn1	Rest	0	M0039	0.134229
Ntn1	Tnnc2	0	M0039	0.0918759
Ntn1	Doc2g	0	M0039	0.0295339
Ntn1	Itgb7	0	M0039	0.0723343
Ntn1	Slc6a18	0	M0039	0.0178803
Ntn1	Fmnl1	0	M0039	0.0383161
Ntn1	Irf7	0	M0039	0.0327336
Ntn1	Vnn1	0	M0039	0.0949349
Ntn1	Pgc	0	M0039	0.0297017
Ntn1	Npl	0	M0039	0.072924
Ntn1	Klhl6	0	M0039	0.137598
Ntn1	Olfr1504	0	M0039	0.0675473
Ntn1	Dok2	0	M0039	0.0393225
Ntn1	Hpgd	0	M0039	0.0612553
Ntn1	Ly86	0	M0039	0.0833053
Ntn1	Ropn1	0	M0039	0.0410942
Ntn1	Mak	0	M0039	0.0781776
Ntn1	S100a3	0	M0039	0.0502542
Ntn1	H2-DMa	0	M0039	0.0880843
Ntn1	Prss12	0	M0039	0.0393104
Ntn1	Bmper	0	M0039	0.0526753
Ntn1	Zfp287	0	M0039	0.0341881
Ntn1	Pik3cg	0	M0039	0.0649008
Ntn1	Sfrp2	0	M0039	0.049755
Ntn1	Diap3	0	M0039	0.0470931
Ntn1	Fdft1	0	M0039	0.032761
Ntn1	Slc35d1	0	M0039	0.037979
Ntn1	Col13a1	0	M0039	0.0166658
Ntn1	Cpa4	0	M0039	0.0418246
Ntn1	Sox11	0	M0039	0.0090739
Ntn1	1700011F03Rik	0	M0039	0.0306946
Ntn1	Nova1	0	M0039	0.0715044
Ntn1	Pcdhb13	0	M0039	0.0243063
Ntn1	Ms4a4d	0	M0039	0.0263284
Ntn1	Cdc6	0	M0039	0.00461373
Ntn1	Pln	0	M0039	0.0172326
Ntn1	Alms1	0	M0039	0.0618753
Ntn1	Dach2	0	M0039	0.0976373
Ntn1	Rnf103	0	M0039	0.0360027
Ntn1	Fgd2	0	M0039	0.14868
Ntn1	Sdc3	0	M0039	0.05561
Ntn1	Col8a1	0	M0039	0.0231763
Ntn1	2210020M01Rik	0	M0039	0.0619887
Ntn1	Chrna4	0	M0039	0.0634992
Ntn1	Drd1a	0	M0039	0.0440411
Ntn1	Slc9a9	0	M0039	0.0413078
Ntn1	Bpgm	0	M0039	0.0431781
Ntn1	Slc15a3	0	M0039	0.0493913
Ntn1	Jrk	0	M0039	0.0449218
Ntn1	Kcnk5	0	M0039	0.038903
Ntn1	Rgs18	0	M0039	0.03472
Ntn1	AW146020	0	M0039	0.105921
Ntn1	Lcp1	0	M0039	0.0334094
Ntn1	Oit3	0	M0039	0.0927132
Ntn1	Ccr5	0	M0039	0.0292171
Ntn1	Foxo6	0	M0039	0.0124309
Ntn1	Sncaip	0	M0039	0.037804
Ntn1	Csf1r	0	M0039	0.0969512
Ntn1	Olig1	0	M0039	0.0715431
Ntn1	Chst2	0	M0039	0.0248357
Ntn1	Ccl5	0	M0039	0.0428725
Ntn1	Kbtbd10	0	M0039	0.0455805
Ntn1	Tob2	0	M0039	0.0160566
Ntn1	Sertad3	0	M0039	0.0331633
Ntn1	Tmie	0	M0039	0.0449401
Ntn1	Pik3cd	0	M0039	0.0371376
Ntn1	Lrrc4b	0	M0039	0.0206518
Ntn1	Grb10	0	M0039	0.143358
Ntn1	Olfr630	0	M0039	0.010469
Ntn1	1190002N15Rik	0	M0039	0.0792909
Ntn1	Cd68	0	M0039	0.0887554
Ntn1	Trem2	0	M0039	0.028092
Ntn1	Ppfia4	0	M0039	0.067086
Ntn1	Hcrtr1	0	M0039	0.0848305
Ntn1	9430091E24Rik	0	M0039	0.0823945
Ntn1	Plek	0	M0039	0.0132629
Ntn1	Mycs	0	M0039	0.0382599
Ntn1	Ltbp2	0	M0039	0.0803962
Ntn1	Mdk	0	M0039	0.051015
Ntn1	Gsg1	0	M0039	0.0338106
Ntn1	Ptges	0	M0039	0.0625044
Ntn1	H2-Q7	0	M0039	0.15921
Ntn1	Vps52	0	M0039	0.084086
Ntn1	Olfr470	0	M0039	0.090606
Ntn1	Hcst	0	M0039	0.0219122
Ntn1	Mrc1	0	M0039	0.0331773
Ntn1	Adam34	0	M0039	0.0170993
Ntn1	Pprc1	0	M0039	0.0751221
Ntn1	Ubtf	0	M0039	0.0971982
Ntn1	Ifi47	0	M0039	0.0603239
Ntn1	1500009C09Rik	0	M0039	0.0603922
Ntn1	C530028O21Rik	0	M0039	0.0771646
Ntn1	Cdkn2a	0	M0039	0.0846532
Ntn1	Fcgr1	0	M0039	0.11825
Ntn1	Oxtr	0	M0039	0.0760027
Ntn1	Gal3st1	0	M0039	0.0174915
Ntn1	Sema5a	0	M0039	0.133256
Ntn1	Olfr24	0	M0039	0.0421289
Ntn1	Prosapip1	0	M0039	0.0955104
Ntn1	Adra2a	0	M0039	0.0339584
Ntn1	Muc4	0	M0039	0.011115
Ntn1	Olfr729	0	M0039	0.00988509
Ntn1	Clcn1	0	M0039	0.13436
Ntn1	Cabp5	0	M0039	0.110679
Ntn1	Atp1a3	0	M0039	0.108242
Ntn1	Gas7	0	M0039	0.029433
Ntn1	Msx2	0	M0039	0.083519
Ntn1	BC013712	0	M0039	0.111319
Ntn1	Cd84	0	M0039	0.0379959
Ntn1	Apod	0	M0039	0.0148624
Ntn1	G6pc2	0	M0039	0.0502718
Ntn1	Gp49a	0	M0039	0.0567542
Ntn1	Cnksr2	0	M0039	0.118458
Ntn1	Wrb	0	M0039	0.113743
Ntn1	Cyp2b19	0	M0039	0.0538487
Ntn1	Olfr975	0	M0039	0.012776
Ntn1	Cybb	0	M0039	0.0765383
Ntn1	Pou2af1	0	M0039	0.0180666
Ntn1	Traf2	0	M0039	0.0332113
Ntn1	Pzp	0	M0039	0.123693
Ntn1	1810010H24Rik	0	M0039	0.0432214
Ntn1	Adcy9	0	M0039	0.0318919
Ntn1	Usp18	0	M0039	0.0869624
Ntn1	Alg12	0	M0039	0.0989134
Ntn1	Mx1	0	M0039	0.151021
Ntn1	Myo1f	0	M0039	0.123909
Ntn1	Tbc1d12	0	M0039	0.0307246
Ntn1	Akp3	0	M0039	0.0204178
Ntn1	Cd48	0	M0039	0.141936
Ntn1	Pard6g	0	M0039	0.0798665
Ntn1	Tas2r105	0	M0039	0.0207947
Ntn1	Sorl1	0	M0039	0.149849
Ntn1	Ccl28	0	M0039	0.033753
Ntn1	Cyp3a13	0	M0039	0.184051
Ntn1	Ptpro	0	M0039	0.0597416
Ntn1	1700065I16Rik	0	M0039	0.00997812
Ntn1	Rorb	0	M0039	0.0522986
Ntn1	4933400C23	0	M0039	0.0758045
Ntn1	4930550C17Rik	0	M0039	0.0245136
Ntn1	Prrx2	0	M0039	0.0580236
Ntn1	Lrrc2	0	M0039	0.0218555
Ntn1	Sardh	0	M0039	0.142226
Ntn1	4930417G10Rik	0	M0039	0.0573203
Ntn1	Kit	0	M0039	0.0388537
Ptgfrn	Serpinb13	0	M0039	0.118557
Ptgfrn	Mgst2	0	M0039	0.099607
Ptgfrn	Folr2	0	M0039	0.0997872
Ptgfrn	Nme4	0	M0039	0.149516
Ptgfrn	Hs6st1	0	M0039	0.0551163
Ptgfrn	C1qa	0	M0039	0.118531
Ptgfrn	Slfn4	0	M0039	0.117143
Ptgfrn	Rem2	0	M0039	0.0534905
Ptgfrn	Gk2	0	M0039	0.0707765
Ptgfrn	Cd83	0	M0039	0.0828649
Ptgfrn	Sc4mol	0	M0039	0.0804162
Ptgfrn	Abp1	0	M0039	0.0321581
Ptgfrn	Cab39	0	M0039	0.133375
Ptgfrn	Il10ra	0	M0039	0.0854305
Ptgfrn	Trpv5	0	M0039	0.0628006
Ptgfrn	Exo1	0	M0039	0.126072
Ptgfrn	Sppl3	0	M0039	0.0940688
Ptgfrn	Akr1c12	0	M0039	0.136174
Ptgfrn	Dpys	0	M0039	0.0640745
Ptgfrn	Mill1	0	M0039	0.0254399
Ptgfrn	Tyrobp	0	M0039	0.0940972
Ptgfrn	Itgb2	0	M0039	0.0748003
Ptgfrn	Kctd16	0	M0039	0.168797
Ptgfrn	Slc15a2	0	M0039	0.0667817
Ptgfrn	Gmip	0	M0039	0.0793005
Ptgfrn	H2-DMb1	0	M0039	0.158888
Ptgfrn	Frzb	0	M0039	0.072496
Ptgfrn	Cdh16	0	M0039	0.0641371
Ptgfrn	Ifitm6	0	M0039	0.0983308
Ptgfrn	4933405O20Rik	0	M0039	0.0317301
Ptgfrn	2010107G23Rik	0	M0039	0.162192
Ptgfrn	Csf3	0	M0039	0.112729
Ptgfrn	3110009E18Rik	0	M0039	0.0282062
Ptgfrn	1700093K21Rik	0	M0039	0.0337939
Ptgfrn	4833427G06Rik	0	M0039	0.112634
Ptgfrn	Aox1	0	M0039	0.131209
Ptgfrn	Cdon	0	M0039	0.102484
Ptgfrn	Chn1	0	M0039	0.116079
Ptgfrn	Mmp2	0	M0039	0.0608604
Ptgfrn	Cd79b	0	M0039	0.117025
Ptgfrn	Rest	0	M0039	0.15813
Ptgfrn	Tnnc2	0	M0039	0.177326
Ptgfrn	Doc2g	0	M0039	0.110343
Ptgfrn	Itgb7	0	M0039	0.119988
Ptgfrn	Slc6a18	0	M0039	0.0419753
Ptgfrn	Fmnl1	0	M0039	0.0535467
Ptgfrn	Irf7	0	M0039	0.0930958
Ptgfrn	Vnn1	0	M0039	0.0980963
Ptgfrn	Pgc	0	M0039	0.0983514
Ptgfrn	Npl	0	M0039	0.0930918
Ptgfrn	Klhl6	0	M0039	0.13917
Ptgfrn	Olfr1504	0	M0039	0.110397
Ptgfrn	Dok2	0	M0039	0.114094
Ptgfrn	Hpgd	0	M0039	0.079358
Ptgfrn	Ly86	0	M0039	0.115611
Ptgfrn	Ropn1	0	M0039	0.0871221
Ptgfrn	Mak	0	M0039	0.0893513
Ptgfrn	S100a3	0	M0039	0.0583872
Ptgfrn	H2-DMa	0	M0039	0.184174
Ptgfrn	Prss12	0	M0039	0.041404
Ptgfrn	Bmper	0	M0039	0.0878114
Ptgfrn	Zfp287	0	M0039	0.0626192
Ptgfrn	Pik3cg	0	M0039	0.0888088
Ptgfrn	Sfrp2	0	M0039	0.0510983
Ptgfrn	Diap3	0	M0039	0.145832
Ptgfrn	Fdft1	0	M0039	0.050051
Ptgfrn	Slc35d1	0	M0039	0.0476192
Ptgfrn	Col13a1	0	M0039	0.0617827
Ptgfrn	Cpa4	0	M0039	0.0621367
Ptgfrn	Sox11	0	M0039	0.0299566
Ptgfrn	1700011F03Rik	0	M0039	0.0989342
Ptgfrn	Nova1	0	M0039	0.111858
Ptgfrn	Pcdhb13	0	M0039	0.0752576
Ptgfrn	Ms4a4d	0	M0039	0.0542415
Ptgfrn	Cdc6	0	M0039	0.00839687
Ptgfrn	Pln	0	M0039	0.0640682
Ptgfrn	Alms1	0	M0039	0.112639
Ptgfrn	Dach2	0	M0039	0.113079
Ptgfrn	Rnf103	0	M0039	0.0760662
Ptgfrn	Fgd2	0	M0039	0.142993
Ptgfrn	Sdc3	0	M0039	0.114562
Ptgfrn	Col8a1	0	M0039	0.0618651
Ptgfrn	2210020M01Rik	0	M0039	0.109941
Ptgfrn	Chrna4	0	M0039	0.0914847
Ptgfrn	Drd1a	0	M0039	0.0849239
Ptgfrn	Slc9a9	0	M0039	0.0687001
Ptgfrn	Bpgm	0	M0039	0.100965
Ptgfrn	Slc15a3	0	M0039	0.063027
Ptgfrn	Jrk	0	M0039	0.0630507
Ptgfrn	Kcnk5	0	M0039	0.0608055
Ptgfrn	Rgs18	0	M0039	0.0721107
Ptgfrn	AW146020	0	M0039	0.122049
Ptgfrn	Lcp1	0	M0039	0.101929
Ptgfrn	Oit3	0	M0039	0.134847
Ptgfrn	Ccr5	0	M0039	0.0901092
Ptgfrn	Foxo6	0	M0039	0.0747242
Ptgfrn	Sncaip	0	M0039	0.0936629
Ptgfrn	Csf1r	0	M0039	0.133214
Ptgfrn	Olig1	0	M0039	0.129896
Ptgfrn	Chst2	0	M0039	0.108195
Ptgfrn	Ccl5	0	M0039	0.146013
Ptgfrn	Kbtbd10	0	M0039	0.151792
Ptgfrn	Tob2	0	M0039	0.0574829
Ptgfrn	Sertad3	0	M0039	0.0793083
Ptgfrn	Tmie	0	M0039	0.0686795
Ptgfrn	Pik3cd	0	M0039	0.111878
Ptgfrn	Lrrc4b	0	M0039	0.0553398
Ptgfrn	Grb10	0	M0039	0.16732
Ptgfrn	Olfr630	0	M0039	0.0357794
Ptgfrn	1190002N15Rik	0	M0039	0.105707
Ptgfrn	Cd68	0	M0039	0.136593
Ptgfrn	Trem2	0	M0039	0.079181
Ptgfrn	Ppfia4	0	M0039	0.0874754
Ptgfrn	Hcrtr1	0	M0039	0.108022
Ptgfrn	9430091E24Rik	0	M0039	0.0541572
Ptgfrn	Plek	0	M0039	0.0811525
Ptgfrn	Mycs	0	M0039	0.0307277
Ptgfrn	Ltbp2	0	M0039	0.115739
Ptgfrn	Mdk	0	M0039	0.0939312
Ptgfrn	Gsg1	0	M0039	0.116619
Ptgfrn	Ptges	0	M0039	0.103621
Ptgfrn	H2-Q7	0	M0039	0.141034
Ptgfrn	Vps52	0	M0039	0.0877307
Ptgfrn	Olfr470	0	M0039	0.141606
Ptgfrn	Hcst	0	M0039	0.102794
Ptgfrn	Mrc1	0	M0039	0.0932191
Ptgfrn	Adam34	0	M0039	0.106287
Ptgfrn	Pprc1	0	M0039	0.102767
Ptgfrn	Ubtf	0	M0039	0.0860507
Ptgfrn	Ifi47	0	M0039	0.126872
Ptgfrn	1500009C09Rik	0	M0039	0.0863652
Ptgfrn	C530028O21Rik	0	M0039	0.0925233
Ptgfrn	Cdkn2a	0	M0039	0.0960668
Ptgfrn	Fcgr1	0	M0039	0.143188
Ptgfrn	Oxtr	0	M0039	0.107417
Ptgfrn	Gal3st1	0	M0039	0.0587146
Ptgfrn	Sema5a	0	M0039	0.151373
Ptgfrn	Olfr24	0	M0039	0.072095
Ptgfrn	Prosapip1	0	M0039	0.0873651
Ptgfrn	Adra2a	0	M0039	0.0676953
Ptgfrn	Muc4	0	M0039	0.0727981
Ptgfrn	Olfr729	0	M0039	0.0307982
Ptgfrn	Clcn1	0	M0039	0.140591
Ptgfrn	Cabp5	0	M0039	0.0858541
Ptgfrn	Atp1a3	0	M0039	0.140598
Ptgfrn	Gas7	0	M0039	0.119059
Ptgfrn	Msx2	0	M0039	0.103552
Ptgfrn	BC013712	0	M0039	0.176592
Ptgfrn	Cd84	0	M0039	0.111735
Ptgfrn	Apod	0	M0039	0.057551
Ptgfrn	G6pc2	0	M0039	0.0660234
Ptgfrn	Gp49a	0	M0039	0.0962455
Ptgfrn	Cnksr2	0	M0039	0.130787
Ptgfrn	Wrb	0	M0039	0.150597
Ptgfrn	Cyp2b19	0	M0039	0.0453708
Ptgfrn	Olfr975	0	M0039	0.073952
Ptgfrn	Cybb	0	M0039	0.112363
Ptgfrn	Pou2af1	0	M0039	0.0942874
Ptgfrn	Traf2	0	M0039	0.0848399
Ptgfrn	Pzp	0	M0039	0.108858
Ptgfrn	1810010H24Rik	0	M0039	0.1238
Ptgfrn	Adcy9	0	M0039	0.0715325
Ptgfrn	Usp18	0	M0039	0.123197
Ptgfrn	Alg12	0	M0039	0.0759936
Ptgfrn	Mx1	0	M0039	0.0960224
Ptgfrn	Myo1f	0	M0039	0.156093
Ptgfrn	Tbc1d12	0	M0039	0.0322293
Ptgfrn	Akp3	0	M0039	0.0512668
Ptgfrn	Cd48	0	M0039	0.128103
Ptgfrn	Pard6g	0	M0039	0.0551524
Ptgfrn	Tas2r105	0	M0039	0.0247331
Ptgfrn	Sorl1	0	M0039	0.169323
Ptgfrn	Ccl28	0	M0039	0.10454
Ptgfrn	Cyp3a13	0	M0039	0.160114
Ptgfrn	Ptpro	0	M0039	0.0999432
Ptgfrn	1700065I16Rik	0	M0039	0.034758
Ptgfrn	Rorb	0	M0039	0.0488457
Ptgfrn	4933400C23	0	M0039	0.0880031
Ptgfrn	4930550C17Rik	0	M0039	0.0494979
Ptgfrn	Prrx2	0	M0039	0.0780266
Ptgfrn	Lrrc2	0	M0039	0.094091
Ptgfrn	Sardh	0	M0039	0.153237
Ptgfrn	4930417G10Rik	0	M0039	0.0902885
Ptgfrn	Kit	0	M0039	0.0719391
Serpinb13	Mgst2	0	M0039	0.132791
Serpinb13	Folr2	0	M0039	0.119024
Serpinb13	Nme4	0	M0039	0.186234
Serpinb13	Hs6st1	0	M0039	0.155573
Serpinb13	C1qa	0	M0039	0.150405
Serpinb13	Slfn4	0	M0039	0.0684666
Serpinb13	Rem2	0	M0039	0.0589387
Serpinb13	Gk2	0	M0039	0.0429943
Serpinb13	Cd83	0	M0039	0.0856873
Serpinb13	Sc4mol	0	M0039	0.0607144
Serpinb13	Abp1	0	M0039	0.0263509
Serpinb13	Cab39	0	M0039	0.0792023
Serpinb13	Il10ra	0	M0039	0.130384
Serpinb13	Trpv5	0	M0039	0.0156455
Serpinb13	Exo1	0	M0039	0.04697
Serpinb13	Sppl3	0	M0039	0.0312077
Serpinb13	Akr1c12	0	M0039	0.0498833
Serpinb13	Dpys	0	M0039	0.072741
Serpinb13	Mill1	0	M0039	0.0171229
Serpinb13	Tyrobp	0	M0039	0.0902991
Serpinb13	Itgb2	0	M0039	0.0371049
Serpinb13	Kctd16	0	M0039	0.0748551
Serpinb13	Slc15a2	0	M0039	0.0495078
Serpinb13	Gmip	0	M0039	0.176288
Serpinb13	H2-DMb1	0	M0039	0.214119
Serpinb13	Frzb	0	M0039	0.208817
Serpinb13	Cdh16	0	M0039	0.0988401
Serpinb13	Ifitm6	0	M0039	0.0866337
Serpinb13	4933405O20Rik	0	M0039	0.00633398
Serpinb13	2010107G23Rik	0	M0039	0.132661
Serpinb13	Csf3	0	M0039	0.0680176
Serpinb13	3110009E18Rik	0	M0039	0.00837124
Serpinb13	1700093K21Rik	0	M0039	0.0224143
Serpinb13	4833427G06Rik	0	M0039	0.0633783
Serpinb13	Aox1	0	M0039	0.148703
Serpinb13	Cdon	0	M0039	0.0800982
Serpinb13	Chn1	0	M0039	0.175625
Serpinb13	Mmp2	0	M0039	0.0972157
Serpinb13	Cd79b	0	M0039	0.110114
Serpinb13	Rest	0	M0039	0.0788443
Serpinb13	Tnnc2	0	M0039	0.0745652
Serpinb13	Doc2g	0	M0039	0.0699843
Serpinb13	Itgb7	0	M0039	0.123759
Serpinb13	Slc6a18	0	M0039	0.0233344
Serpinb13	Fmnl1	0	M0039	0.0224433
Serpinb13	Irf7	0	M0039	0.0331282
Serpinb13	Vnn1	0	M0039	0.145587
Serpinb13	Pgc	0	M0039	0.036559
Serpinb13	Npl	0	M0039	0.0713368
Serpinb13	Klhl6	0	M0039	0.132859
Serpinb13	Olfr1504	0	M0039	0.0818762
Serpinb13	Dok2	0	M0039	0.135205
Serpinb13	Hpgd	0	M0039	0.0526267
Serpinb13	Ly86	0	M0039	0.0859804
Serpinb13	Ropn1	0	M0039	0.0145397
Serpinb13	Mak	0	M0039	0.0899091
Serpinb13	S100a3	0	M0039	0.0574202
Serpinb13	H2-DMa	0	M0039	0.160407
Serpinb13	Prss12	0	M0039	0.0609319
Serpinb13	Bmper	0	M0039	0.184684
Serpinb13	Zfp287	0	M0039	0.176035
Serpinb13	Pik3cg	0	M0039	0.0649478
Serpinb13	Sfrp2	0	M0039	0.161596
Serpinb13	Diap3	0	M0039	0.102946
Serpinb13	Fdft1	0	M0039	0.00481634
Serpinb13	Slc35d1	0	M0039	0.0578033
Serpinb13	Col13a1	0	M0039	0.0412131
Serpinb13	Cpa4	0	M0039	0.00758933
Serpinb13	Sox11	0	M0039	0.0160584
Serpinb13	1700011F03Rik	0	M0039	0.123651
Serpinb13	Nova1	0	M0039	0.0688607
Serpinb13	Pcdhb13	0	M0039	0.128953
Serpinb13	Ms4a4d	0	M0039	0.116377
Serpinb13	Cdc6	0	M0039	0.00401041
Serpinb13	Pln	0	M0039	0.0380156
Serpinb13	Alms1	0	M0039	0.140659
Serpinb13	Dach2	0	M0039	0.0579404
Serpinb13	Rnf103	0	M0039	0.0531261
Serpinb13	Fgd2	0	M0039	0.228667
Serpinb13	Sdc3	0	M0039	0.132644
Serpinb13	Col8a1	0	M0039	0.118386
Serpinb13	2210020M01Rik	0	M0039	0.121559
Serpinb13	Chrna4	0	M0039	0.056488
Serpinb13	Drd1a	0	M0039	0.040292
Serpinb13	Slc9a9	0	M0039	0.0810122
Serpinb13	Bpgm	0	M0039	0.143077
Serpinb13	Slc15a3	0	M0039	0.116117
Serpinb13	Jrk	0	M0039	0.144346
Serpinb13	Kcnk5	0	M0039	0.0509609
Serpinb13	Rgs18	0	M0039	0.0920086
Serpinb13	AW146020	0	M0039	0.0735377
Serpinb13	Lcp1	0	M0039	0.105508
Serpinb13	Oit3	0	M0039	0.0493791
Serpinb13	Ccr5	0	M0039	0.0924896
Serpinb13	Foxo6	0	M0039	0.0478136
Serpinb13	Sncaip	0	M0039	0.0753185
Serpinb13	Csf1r	0	M0039	0.192719
Serpinb13	Olig1	0	M0039	0.156521
Serpinb13	Chst2	0	M0039	0.0500771
Serpinb13	Ccl5	0	M0039	0.112983
Serpinb13	Kbtbd10	0	M0039	0.0361355
Serpinb13	Tob2	0	M0039	0.0130381
Serpinb13	Sertad3	0	M0039	0.0375535
Serpinb13	Tmie	0	M0039	0.0512462
Serpinb13	Pik3cd	0	M0039	0.131124
Serpinb13	Lrrc4b	0	M0039	0.031777
Serpinb13	Grb10	0	M0039	0.128915
Serpinb13	Olfr630	0	M0039	0.00696039
Serpinb13	1190002N15Rik	0	M0039	0.0450037
Serpinb13	Cd68	0	M0039	0.181883
Serpinb13	Trem2	0	M0039	0.0814796
Serpinb13	Ppfia4	0	M0039	0.143094
Serpinb13	Hcrtr1	0	M0039	0.19467
Serpinb13	9430091E24Rik	0	M0039	0.101035
[truncated: 16,722 more rows]
