# Supplementary material for: Co-expression network analysis identified hub genes critical to triglyceride and free fatty acid metabolism as key regulators of age-related vascular dysfunction in mice
Source: Aging (Albany NY). 2019 Sep 12;11(18):7620–38. doi: 10.18632/aging.102275 (PMC6781998; doi:10.18632/aging.102275)
Supplement: Supplementary Table 19 [file aging-11-102275-s006.xlsx]

## Sheet: Sheet1
Supplementary Table 19. Edge list of top 30 genes within red module that is read in VisANT.
Fbxo32	Ms4a4b	0	M0039	0.178182
Fbxo32	Ptgfrn	0	M0039	0.154354
Fbxo32	Serpinb13	0	M0039	0.159776
Fbxo32	Nme4	0	M0039	0.189784
Fbxo32	C1qa	0	M0039	0.136324
Fbxo32	H2-DMb1	0	M0039	0.187672
Fbxo32	2010107G23Rik	0	M0039	0.230154
Fbxo32	Aox1	0	M0039	0.215934
Fbxo32	Chn1	0	M0039	0.180532
Fbxo32	Itgb7	0	M0039	0.143765
Fbxo32	Ly86	0	M0039	0.165352
Fbxo32	Fgd2	0	M0039	0.228365
Fbxo32	2210020M01Rik	0	M0039	0.126076
Fbxo32	Csf1r	0	M0039	0.151637
Fbxo32	Cd68	0	M0039	0.188631
Fbxo32	H2-Q7	0	M0039	0.264628
Fbxo32	Fcgr1	0	M0039	0.197316
Fbxo32	Sema5a	0	M0039	0.190232
Fbxo32	Atp1a3	0	M0039	0.168763
Fbxo32	BC013712	0	M0039	0.138366
Fbxo32	Wrb	0	M0039	0.194193
Fbxo32	Cybb	0	M0039	0.174166
Fbxo32	Mx1	0	M0039	0.15683
Fbxo32	Myo1f	0	M0039	0.254537
Fbxo32	Cd48	0	M0039	0.183741
Fbxo32	Sorl1	0	M0039	0.193122
Fbxo32	Cyp3a13	0	M0039	0.271859
Fbxo32	Ptpro	0	M0039	0.107507
Fbxo32	Sardh	0	M0039	0.206904
Ms4a4b	Ptgfrn	0	M0039	0.153856
Ms4a4b	Serpinb13	0	M0039	0.149382
Ms4a4b	Nme4	0	M0039	0.188823
Ms4a4b	C1qa	0	M0039	0.144019
Ms4a4b	H2-DMb1	0	M0039	0.205182
Ms4a4b	2010107G23Rik	0	M0039	0.168786
Ms4a4b	Aox1	0	M0039	0.189319
Ms4a4b	Chn1	0	M0039	0.175313
Ms4a4b	Itgb7	0	M0039	0.168928
Ms4a4b	Ly86	0	M0039	0.116282
Ms4a4b	Fgd2	0	M0039	0.205968
Ms4a4b	2210020M01Rik	0	M0039	0.145621
Ms4a4b	Csf1r	0	M0039	0.132898
Ms4a4b	Cd68	0	M0039	0.175248
Ms4a4b	H2-Q7	0	M0039	0.181253
Ms4a4b	Fcgr1	0	M0039	0.156555
Ms4a4b	Sema5a	0	M0039	0.116532
Ms4a4b	Atp1a3	0	M0039	0.196187
Ms4a4b	BC013712	0	M0039	0.12447
Ms4a4b	Wrb	0	M0039	0.214179
Ms4a4b	Cybb	0	M0039	0.149248
Ms4a4b	Mx1	0	M0039	0.122648
Ms4a4b	Myo1f	0	M0039	0.229072
Ms4a4b	Cd48	0	M0039	0.13376
Ms4a4b	Sorl1	0	M0039	0.149619
Ms4a4b	Cyp3a13	0	M0039	0.183139
Ms4a4b	Ptpro	0	M0039	0.115991
Ms4a4b	Sardh	0	M0039	0.156332
Ptgfrn	Serpinb13	0	M0039	0.118557
Ptgfrn	Nme4	0	M0039	0.149516
Ptgfrn	C1qa	0	M0039	0.118531
Ptgfrn	H2-DMb1	0	M0039	0.158888
Ptgfrn	2010107G23Rik	0	M0039	0.162192
Ptgfrn	Aox1	0	M0039	0.131209
Ptgfrn	Chn1	0	M0039	0.116079
Ptgfrn	Itgb7	0	M0039	0.119988
Ptgfrn	Ly86	0	M0039	0.115611
Ptgfrn	Fgd2	0	M0039	0.142993
Ptgfrn	2210020M01Rik	0	M0039	0.109941
Ptgfrn	Csf1r	0	M0039	0.133214
Ptgfrn	Cd68	0	M0039	0.136593
Ptgfrn	H2-Q7	0	M0039	0.141034
Ptgfrn	Fcgr1	0	M0039	0.143188
Ptgfrn	Sema5a	0	M0039	0.151373
Ptgfrn	Atp1a3	0	M0039	0.140598
Ptgfrn	BC013712	0	M0039	0.176592
Ptgfrn	Wrb	0	M0039	0.150597
Ptgfrn	Cybb	0	M0039	0.112363
Ptgfrn	Mx1	0	M0039	0.0960224
Ptgfrn	Myo1f	0	M0039	0.156093
Ptgfrn	Cd48	0	M0039	0.128103
Ptgfrn	Sorl1	0	M0039	0.169323
Ptgfrn	Cyp3a13	0	M0039	0.160114
Ptgfrn	Ptpro	0	M0039	0.0999432
Ptgfrn	Sardh	0	M0039	0.153237
Serpinb13	Nme4	0	M0039	0.186234
Serpinb13	C1qa	0	M0039	0.150405
Serpinb13	H2-DMb1	0	M0039	0.214119
Serpinb13	2010107G23Rik	0	M0039	0.132661
Serpinb13	Aox1	0	M0039	0.148703
Serpinb13	Chn1	0	M0039	0.175625
Serpinb13	Itgb7	0	M0039	0.123759
Serpinb13	Ly86	0	M0039	0.0859804
Serpinb13	Fgd2	0	M0039	0.228667
Serpinb13	2210020M01Rik	0	M0039	0.121559
Serpinb13	Csf1r	0	M0039	0.192719
Serpinb13	Cd68	0	M0039	0.181883
Serpinb13	H2-Q7	0	M0039	0.187189
Serpinb13	Fcgr1	0	M0039	0.166096
Serpinb13	Sema5a	0	M0039	0.077074
Serpinb13	Atp1a3	0	M0039	0.144284
Serpinb13	BC013712	0	M0039	0.0813949
Serpinb13	Wrb	0	M0039	0.234892
Serpinb13	Cybb	0	M0039	0.157987
Serpinb13	Mx1	0	M0039	0.152926
Serpinb13	Myo1f	0	M0039	0.217591
Serpinb13	Cd48	0	M0039	0.080286
Serpinb13	Sorl1	0	M0039	0.121199
Serpinb13	Cyp3a13	0	M0039	0.16293
Serpinb13	Ptpro	0	M0039	0.125311
Serpinb13	Sardh	0	M0039	0.19823
Nme4	C1qa	0	M0039	0.18679
Nme4	H2-DMb1	0	M0039	0.234622
Nme4	2010107G23Rik	0	M0039	0.16911
Nme4	Aox1	0	M0039	0.174188
Nme4	Chn1	0	M0039	0.175811
Nme4	Itgb7	0	M0039	0.180904
Nme4	Ly86	0	M0039	0.126029
Nme4	Fgd2	0	M0039	0.241558
Nme4	2210020M01Rik	0	M0039	0.165678
Nme4	Csf1r	0	M0039	0.180752
Nme4	Cd68	0	M0039	0.215452
Nme4	H2-Q7	0	M0039	0.205839
Nme4	Fcgr1	0	M0039	0.205308
Nme4	Sema5a	0	M0039	0.125668
Nme4	Atp1a3	0	M0039	0.202087
Nme4	BC013712	0	M0039	0.134845
Nme4	Wrb	0	M0039	0.245104
Nme4	Cybb	0	M0039	0.177029
Nme4	Mx1	0	M0039	0.123635
Nme4	Myo1f	0	M0039	0.252594
Nme4	Cd48	0	M0039	0.137167
Nme4	Sorl1	0	M0039	0.144712
Nme4	Cyp3a13	0	M0039	0.193037
Nme4	Ptpro	0	M0039	0.168589
Nme4	Sardh	0	M0039	0.17461
C1qa	H2-DMb1	0	M0039	0.220463
C1qa	2010107G23Rik	0	M0039	0.0879876
C1qa	Aox1	0	M0039	0.133048
C1qa	Chn1	0	M0039	0.0831085
C1qa	Itgb7	0	M0039	0.159841
C1qa	Ly86	0	M0039	0.174008
C1qa	Fgd2	0	M0039	0.224884
C1qa	2210020M01Rik	0	M0039	0.174446
C1qa	Csf1r	0	M0039	0.225411
C1qa	Cd68	0	M0039	0.295925
C1qa	H2-Q7	0	M0039	0.217419
C1qa	Fcgr1	0	M0039	0.228491
C1qa	Sema5a	0	M0039	0.113046
C1qa	Atp1a3	0	M0039	0.114433
C1qa	BC013712	0	M0039	0.100795
C1qa	Wrb	0	M0039	0.180137
C1qa	Cybb	0	M0039	0.211143
C1qa	Mx1	0	M0039	0.0650161
C1qa	Myo1f	0	M0039	0.224361
C1qa	Cd48	0	M0039	0.108286
C1qa	Sorl1	0	M0039	0.140924
C1qa	Cyp3a13	0	M0039	0.186118
C1qa	Ptpro	0	M0039	0.192888
C1qa	Sardh	0	M0039	0.119137
H2-DMb1	2010107G23Rik	0	M0039	0.165407
H2-DMb1	Aox1	0	M0039	0.175311
H2-DMb1	Chn1	0	M0039	0.162549
H2-DMb1	Itgb7	0	M0039	0.209064
H2-DMb1	Ly86	0	M0039	0.152791
H2-DMb1	Fgd2	0	M0039	0.208255
H2-DMb1	2210020M01Rik	0	M0039	0.164775
H2-DMb1	Csf1r	0	M0039	0.175398
H2-DMb1	Cd68	0	M0039	0.210958
H2-DMb1	H2-Q7	0	M0039	0.21096
H2-DMb1	Fcgr1	0	M0039	0.180581
H2-DMb1	Sema5a	0	M0039	0.122798
H2-DMb1	Atp1a3	0	M0039	0.173101
H2-DMb1	BC013712	0	M0039	0.135845
H2-DMb1	Wrb	0	M0039	0.223947
H2-DMb1	Cybb	0	M0039	0.220491
H2-DMb1	Mx1	0	M0039	0.122199
H2-DMb1	Myo1f	0	M0039	0.2299
H2-DMb1	Cd48	0	M0039	0.138798
H2-DMb1	Sorl1	0	M0039	0.157825
H2-DMb1	Cyp3a13	0	M0039	0.194415
H2-DMb1	Ptpro	0	M0039	0.18764
H2-DMb1	Sardh	0	M0039	0.165165
2010107G23Rik	Aox1	0	M0039	0.191635
2010107G23Rik	Chn1	0	M0039	0.173005
2010107G23Rik	Itgb7	0	M0039	0.133628
2010107G23Rik	Ly86	0	M0039	0.120288
2010107G23Rik	Fgd2	0	M0039	0.17716
2010107G23Rik	2210020M01Rik	0	M0039	0.0844918
2010107G23Rik	Csf1r	0	M0039	0.106674
2010107G23Rik	Cd68	0	M0039	0.126867
2010107G23Rik	H2-Q7	0	M0039	0.20303
2010107G23Rik	Fcgr1	0	M0039	0.158707
2010107G23Rik	Sema5a	0	M0039	0.186348
2010107G23Rik	Atp1a3	0	M0039	0.163704
2010107G23Rik	BC013712	0	M0039	0.145666
2010107G23Rik	Wrb	0	M0039	0.185669
2010107G23Rik	Cybb	0	M0039	0.12051
2010107G23Rik	Mx1	0	M0039	0.172366
2010107G23Rik	Myo1f	0	M0039	0.206331
2010107G23Rik	Cd48	0	M0039	0.191225
2010107G23Rik	Sorl1	0	M0039	0.187494
2010107G23Rik	Cyp3a13	0	M0039	0.218571
2010107G23Rik	Ptpro	0	M0039	0.0812789
2010107G23Rik	Sardh	0	M0039	0.20215
Aox1	Chn1	0	M0039	0.187413
Aox1	Itgb7	0	M0039	0.140867
Aox1	Ly86	0	M0039	0.152783
Aox1	Fgd2	0	M0039	0.239825
Aox1	2210020M01Rik	0	M0039	0.136512
Aox1	Csf1r	0	M0039	0.139783
Aox1	Cd68	0	M0039	0.188026
Aox1	H2-Q7	0	M0039	0.259091
Aox1	Fcgr1	0	M0039	0.177087
Aox1	Sema5a	0	M0039	0.154713
Aox1	Atp1a3	0	M0039	0.177071
Aox1	BC013712	0	M0039	0.112718
Aox1	Wrb	0	M0039	0.194062
Aox1	Cybb	0	M0039	0.168721
Aox1	Mx1	0	M0039	0.150659
Aox1	Myo1f	0	M0039	0.255172
Aox1	Cd48	0	M0039	0.165003
Aox1	Sorl1	0	M0039	0.170714
Aox1	Cyp3a13	0	M0039	0.264846
Aox1	Ptpro	0	M0039	0.102249
Aox1	Sardh	0	M0039	0.17366
Chn1	Itgb7	0	M0039	0.105074
Chn1	Ly86	0	M0039	0.0837009
Chn1	Fgd2	0	M0039	0.221332
Chn1	2210020M01Rik	0	M0039	0.111089
Chn1	Csf1r	0	M0039	0.112069
Chn1	Cd68	0	M0039	0.123996
Chn1	H2-Q7	0	M0039	0.185589
Chn1	Fcgr1	0	M0039	0.141307
Chn1	Sema5a	0	M0039	0.118062
Chn1	Atp1a3	0	M0039	0.192425
Chn1	BC013712	0	M0039	0.0923102
Chn1	Wrb	0	M0039	0.223851
Chn1	Cybb	0	M0039	0.108191
Chn1	Mx1	0	M0039	0.21601
Chn1	Myo1f	0	M0039	0.235447
Chn1	Cd48	0	M0039	0.116105
Chn1	Sorl1	0	M0039	0.127909
Chn1	Cyp3a13	0	M0039	0.191533
Chn1	Ptpro	0	M0039	0.0622714
Chn1	Sardh	0	M0039	0.212166
Itgb7	Ly86	0	M0039	0.160292
Itgb7	Fgd2	0	M0039	0.20738
Itgb7	2210020M01Rik	0	M0039	0.140231
Itgb7	Csf1r	0	M0039	0.157355
Itgb7	Cd68	0	M0039	0.233701
Itgb7	H2-Q7	0	M0039	0.198008
Itgb7	Fcgr1	0	M0039	0.209397
Itgb7	Sema5a	0	M0039	0.134113
Itgb7	Atp1a3	0	M0039	0.129
Itgb7	BC013712	0	M0039	0.113716
Itgb7	Wrb	0	M0039	0.185659
Itgb7	Cybb	0	M0039	0.184792
Itgb7	Mx1	0	M0039	0.0974364
Itgb7	Myo1f	0	M0039	0.220148
Itgb7	Cd48	0	M0039	0.168345
Itgb7	Sorl1	0	M0039	0.158588
Itgb7	Cyp3a13	0	M0039	0.185569
Itgb7	Ptpro	0	M0039	0.164295
Itgb7	Sardh	0	M0039	0.114718
Ly86	Fgd2	0	M0039	0.152486
Ly86	2210020M01Rik	0	M0039	0.13206
Ly86	Csf1r	0	M0039	0.132075
Ly86	Cd68	0	M0039	0.204106
Ly86	H2-Q7	0	M0039	0.179595
Ly86	Fcgr1	0	M0039	0.18613
Ly86	Sema5a	0	M0039	0.1836
Ly86	Atp1a3	0	M0039	0.11403
Ly86	BC013712	0	M0039	0.130431
Ly86	Wrb	0	M0039	0.117423
Ly86	Cybb	0	M0039	0.19352
Ly86	Mx1	0	M0039	0.0770459
Ly86	Myo1f	0	M0039	0.179182
Ly86	Cd48	0	M0039	0.149044
Ly86	Sorl1	0	M0039	0.174784
Ly86	Cyp3a13	0	M0039	0.182614
Ly86	Ptpro	0	M0039	0.130794
Ly86	Sardh	0	M0039	0.10893
Fgd2	2210020M01Rik	0	M0039	0.210804
Fgd2	Csf1r	0	M0039	0.200684
Fgd2	Cd68	0	M0039	0.216047
Fgd2	H2-Q7	0	M0039	0.249026
Fgd2	Fcgr1	0	M0039	0.194849
Fgd2	Sema5a	0	M0039	0.132756
Fgd2	Atp1a3	0	M0039	0.23917
Fgd2	BC013712	0	M0039	0.13696
Fgd2	Wrb	0	M0039	0.218903
Fgd2	Cybb	0	M0039	0.223461
Fgd2	Mx1	0	M0039	0.153911
Fgd2	Myo1f	0	M0039	0.248047
Fgd2	Cd48	0	M0039	0.153923
Fgd2	Sorl1	0	M0039	0.144655
Fgd2	Cyp3a13	0	M0039	0.235018
Fgd2	Ptpro	0	M0039	0.220196
Fgd2	Sardh	0	M0039	0.172132
2210020M01Rik	Csf1r	0	M0039	0.177837
2210020M01Rik	Cd68	0	M0039	0.228019
2210020M01Rik	H2-Q7	0	M0039	0.165845
2210020M01Rik	Fcgr1	0	M0039	0.198416
2210020M01Rik	Sema5a	0	M0039	0.110013
2210020M01Rik	Atp1a3	0	M0039	0.161693
2210020M01Rik	BC013712	0	M0039	0.0978417
2210020M01Rik	Wrb	0	M0039	0.157867
2210020M01Rik	Cybb	0	M0039	0.150024
2210020M01Rik	Mx1	0	M0039	0.0758222
2210020M01Rik	Myo1f	0	M0039	0.201256
2210020M01Rik	Cd48	0	M0039	0.0966047
2210020M01Rik	Sorl1	0	M0039	0.110612
2210020M01Rik	Cyp3a13	0	M0039	0.159276
2210020M01Rik	Ptpro	0	M0039	0.149759
2210020M01Rik	Sardh	0	M0039	0.107572
Csf1r	Cd68	0	M0039	0.222514
Csf1r	H2-Q7	0	M0039	0.189937
Csf1r	Fcgr1	0	M0039	0.196746
Csf1r	Sema5a	0	M0039	0.103098
Csf1r	Atp1a3	0	M0039	0.137056
Csf1r	BC013712	0	M0039	0.119704
Csf1r	Wrb	0	M0039	0.159014
Csf1r	Cybb	0	M0039	0.193824
Csf1r	Mx1	0	M0039	0.0918011
Csf1r	Myo1f	0	M0039	0.171078
Csf1r	Cd48	0	M0039	0.101061
Csf1r	Sorl1	0	M0039	0.125676
Csf1r	Cyp3a13	0	M0039	0.170435
Csf1r	Ptpro	0	M0039	0.228153
Csf1r	Sardh	0	M0039	0.135525
Cd68	H2-Q7	0	M0039	0.231104
Cd68	Fcgr1	0	M0039	0.217982
Cd68	Sema5a	0	M0039	0.130566
Cd68	Atp1a3	0	M0039	0.172939
Cd68	BC013712	0	M0039	0.132067
Cd68	Wrb	0	M0039	0.171417
Cd68	Cybb	0	M0039	0.266787
Cd68	Mx1	0	M0039	0.0852412
Cd68	Myo1f	0	M0039	0.217944
Cd68	Cd48	0	M0039	0.143549
Cd68	Sorl1	0	M0039	0.145265
Cd68	Cyp3a13	0	M0039	0.205785
Cd68	Ptpro	0	M0039	0.280683
Cd68	Sardh	0	M0039	0.124529
H2-Q7	Fcgr1	0	M0039	0.210464
H2-Q7	Sema5a	0	M0039	0.149516
H2-Q7	Atp1a3	0	M0039	0.19928
H2-Q7	BC013712	0	M0039	0.135494
H2-Q7	Wrb	0	M0039	0.211863
H2-Q7	Cybb	0	M0039	0.232236
H2-Q7	Mx1	0	M0039	0.130712
H2-Q7	Myo1f	0	M0039	0.249292
H2-Q7	Cd48	0	M0039	0.166917
H2-Q7	Sorl1	0	M0039	0.170962
H2-Q7	Cyp3a13	0	M0039	0.247245
H2-Q7	Ptpro	0	M0039	0.192004
H2-Q7	Sardh	0	M0039	0.17809
Fcgr1	Sema5a	0	M0039	0.16316
Fcgr1	Atp1a3	0	M0039	0.178588
Fcgr1	BC013712	0	M0039	0.155743
Fcgr1	Wrb	0	M0039	0.163196
Fcgr1	Cybb	0	M0039	0.216931
Fcgr1	Mx1	0	M0039	0.112953
Fcgr1	Myo1f	0	M0039	0.193955
Fcgr1	Cd48	0	M0039	0.168888
Fcgr1	Sorl1	0	M0039	0.147513
Fcgr1	Cyp3a13	0	M0039	0.196544
Fcgr1	Ptpro	0	M0039	0.251212
Fcgr1	Sardh	0	M0039	0.142945
Sema5a	Atp1a3	0	M0039	0.14859
Sema5a	BC013712	0	M0039	0.191553
Sema5a	Wrb	0	M0039	0.117941
Sema5a	Cybb	0	M0039	0.128818
Sema5a	Mx1	0	M0039	0.102337
Sema5a	Myo1f	0	M0039	0.152058
Sema5a	Cd48	0	M0039	0.181285
Sema5a	Sorl1	0	M0039	0.179434
Sema5a	Cyp3a13	0	M0039	0.17399
Sema5a	Ptpro	0	M0039	0.100052
Sema5a	Sardh	0	M0039	0.134572
Atp1a3	BC013712	0	M0039	0.130608
Atp1a3	Wrb	0	M0039	0.207221
Atp1a3	Cybb	0	M0039	0.12387
Atp1a3	Mx1	0	M0039	0.141571
Atp1a3	Myo1f	0	M0039	0.2521
Atp1a3	Cd48	0	M0039	0.143001
Atp1a3	Sorl1	0	M0039	0.138754
Atp1a3	Cyp3a13	0	M0039	0.215264
Atp1a3	Ptpro	0	M0039	0.0925691
Atp1a3	Sardh	0	M0039	0.162762
BC013712	Wrb	0	M0039	0.131451
BC013712	Cybb	0	M0039	0.0990149
BC013712	Mx1	0	M0039	0.0897754
BC013712	Myo1f	0	M0039	0.14576
BC013712	Cd48	0	M0039	0.151598
BC013712	Sorl1	0	M0039	0.183848
BC013712	Cyp3a13	0	M0039	0.162764
BC013712	Ptpro	0	M0039	0.0987563
BC013712	Sardh	0	M0039	0.127313
Wrb	Cybb	0	M0039	0.18623
Wrb	Mx1	0	M0039	0.169542
Wrb	Myo1f	0	M0039	0.238116
Wrb	Cd48	0	M0039	0.141812
Wrb	Sorl1	0	M0039	0.144232
Wrb	Cyp3a13	0	M0039	0.198172
Wrb	Ptpro	0	M0039	0.161495
Wrb	Sardh	0	M0039	0.186928
Cybb	Mx1	0	M0039	0.100542
Cybb	Myo1f	0	M0039	0.236335
Cybb	Cd48	0	M0039	0.133062
Cybb	Sorl1	0	M0039	0.165418
Cybb	Cyp3a13	0	M0039	0.206194
Cybb	Ptpro	0	M0039	0.175011
Cybb	Sardh	0	M0039	0.139413
Mx1	Myo1f	0	M0039	0.149136
Mx1	Cd48	0	M0039	0.108273
Mx1	Sorl1	0	M0039	0.118316
Mx1	Cyp3a13	0	M0039	0.134478
Mx1	Ptpro	0	M0039	0.062497
Mx1	Sardh	0	M0039	0.18218
Myo1f	Cd48	0	M0039	0.161233
Myo1f	Sorl1	0	M0039	0.160835
Myo1f	Cyp3a13	0	M0039	0.244927
Myo1f	Ptpro	0	M0039	0.174176
Myo1f	Sardh	0	M0039	0.1837
Cd48	Sorl1	0	M0039	0.165959
Cd48	Cyp3a13	0	M0039	0.177728
Cd48	Ptpro	0	M0039	0.133954
Cd48	Sardh	0	M0039	0.115355
Sorl1	Cyp3a13	0	M0039	0.19004
Sorl1	Ptpro	0	M0039	0.121035
Sorl1	Sardh	0	M0039	0.147046
Cyp3a13	Ptpro	0	M0039	0.157992
Cyp3a13	Sardh	0	M0039	0.180277
Ptpro	Sardh	0	M0039	0.0884024
