# Supplementary material for: Co-expression network analysis identified hub genes critical to triglyceride and free fatty acid metabolism as key regulators of age-related vascular dysfunction in mice
Source: Aging (Albany NY). 2019 Sep 12;11(18):7620–38. doi: 10.18632/aging.102275 (PMC6781998; doi:10.18632/aging.102275)
Supplement: Supplementary Table 20 [file aging-11-102275-s020.xlsx]

## Sheet: Sheet1
Supplementary Table 20. Edge list of genes within the turquoise module that is read in VisANT.
Upk1b	Coch	0	M0039	0.027817
Upk1b	Fcna	0	M0039	0.00801063
Upk1b	Card14	0	M0039	0.0131813
Upk1b	Mcpt4	0	M0039	0.0630483
Upk1b	Pkp1	0	M0039	0.0397765
Upk1b	Kcne1l	0	M0039	0.0453823
Upk1b	Gdf10	0	M0039	0.0320349
Upk1b	Adcy1	0	M0039	0.0561508
Upk1b	Anxa8	0	M0039	0.146404
Upk1b	Fmod	0	M0039	0.0453905
Upk1b	Cpa3	0	M0039	0.042259
Upk1b	Pi15	0	M0039	0.0840066
Upk1b	Ptgs2	0	M0039	0.0120389
Upk1b	Retnla	0	M0039	0.0255214
Upk1b	Rgs1	0	M0039	0.00846823
Upk1b	Crym	0	M0039	0.084238
Upk1b	Acr	0	M0039	0.0781525
Upk1b	Olfr575	0	M0039	0.040477
Upk1b	Plcb1	0	M0039	0.0572057
Upk1b	Ier3	0	M0039	0.0278161
Upk1b	Arg1	0	M0039	0.0477946
Upk1b	Atp8a2	0	M0039	0.0191509
Upk1b	Nid2	0	M0039	0.0448358
Upk1b	Syt10	0	M0039	0.0709063
Upk1b	Ccl24	0	M0039	0.0504496
Upk1b	1700025G04Rik	0	M0039	0.0526359
Upk1b	Scn1b	0	M0039	0.0571131
Upk1b	Svs5	0	M0039	0.00746277
Upk1b	Slc25a30	0	M0039	0.0272353
Upk1b	Hic1	0	M0039	0.0961343
Upk1b	Fads1	0	M0039	0.0948565
Upk1b	Tnfaip2	0	M0039	0.0237167
Upk1b	Myoc	0	M0039	0.0496557
Upk1b	Coq3	0	M0039	0.0327887
Upk1b	Scx	0	M0039	0.0768105
Upk1b	Acsl6	0	M0039	0.112959
Upk1b	Rasa4	0	M0039	0.0717253
Upk1b	4931428L18Rik	0	M0039	0.0232655
Upk1b	Rarres1	0	M0039	0.03674
Upk1b	Pcdhb6	0	M0039	0.0988846
Upk1b	Ahsg	0	M0039	0.0435499
Upk1b	Mmp20	0	M0039	0.0910804
Upk1b	Gpnmb	0	M0039	0.0439486
Upk1b	Dpp7	0	M0039	0.0312241
Upk1b	Glra1	0	M0039	0.0667263
Upk1b	Ear11	0	M0039	0.00908801
Upk1b	Gdap1	0	M0039	0.0274223
Upk1b	Homer3	0	M0039	0.0385724
Upk1b	Agxt	0	M0039	0.0840259
Upk1b	Rfx4	0	M0039	0.0654288
Upk1b	Cacna2d3	0	M0039	0.0346515
Upk1b	Cst9	0	M0039	0.159075
Upk1b	P2rx7	0	M0039	0.0309273
Upk1b	Mx2	0	M0039	0.0289111
Upk1b	Trpc4	0	M0039	0.020803
Upk1b	Ankrd1	0	M0039	0.0273797
Upk1b	Hspa8	0	M0039	0.0636581
Upk1b	Dbnl	0	M0039	0.0825895
Upk1b	Plekhb2	0	M0039	0.126555
Upk1b	Slc6a15	0	M0039	0.0150608
Upk1b	Uchl1	0	M0039	0.0674333
Upk1b	Igfbp4	0	M0039	0.0913822
Upk1b	Ece2	0	M0039	0.0131355
Upk1b	Fbln5	0	M0039	0.081103
Upk1b	4932414N04Rik	0	M0039	0.0666448
Upk1b	Crlf1	0	M0039	0.0410563
Upk1b	Foxn2	0	M0039	0.031495
Upk1b	Cntn6	0	M0039	0.0401773
Upk1b	Ctdsp2	0	M0039	0.159678
Upk1b	Slpi	0	M0039	0.0416129
Upk1b	Kif1a	0	M0039	0.0995392
Upk1b	Cpxm2	0	M0039	0.038972
Upk1b	BC026585	0	M0039	0.067422
Upk1b	Bid	0	M0039	0.0410026
Upk1b	Pdxp	0	M0039	0.0613622
Upk1b	Htr1a	0	M0039	0.0320249
Upk1b	Icam1	0	M0039	0.0127761
Upk1b	Skiv2l	0	M0039	0.0960128
Upk1b	Il28ra	0	M0039	0.0269361
Upk1b	Aamp	0	M0039	0.0792655
Upk1b	Trim9	0	M0039	0.0575581
Upk1b	Pak1	0	M0039	0.0578264
Upk1b	4933402N03Rik	0	M0039	0.0200199
Upk1b	Cacng5	0	M0039	0.0515258
Upk1b	Rtn4rl1	0	M0039	0.0240823
Upk1b	D430019H16Rik	0	M0039	0.0757366
Upk1b	Arid3a	0	M0039	0.0516159
Upk1b	Spry1	0	M0039	0.0259639
Upk1b	Wt1	0	M0039	0.165612
Upk1b	Mlana	0	M0039	0.0809526
Upk1b	Etv4	0	M0039	0.0706928
Upk1b	Cntn1	0	M0039	0.05147
Upk1b	Cxcr6	0	M0039	0.0454619
Upk1b	Folh1	0	M0039	0.0324163
Upk1b	1700015G11Rik	0	M0039	0.0239848
Upk1b	Cyp2s1	0	M0039	0.138672
Upk1b	Bai2	0	M0039	0.129076
Upk1b	Abcc6	0	M0039	0.0056878
Upk1b	F3	0	M0039	0.0576584
Upk1b	Tnr	0	M0039	0.0198106
Upk1b	Clic3	0	M0039	0.037912
Upk1b	Olfr1265	0	M0039	0.0440742
Upk1b	Olfr1052	0	M0039	0.058537
Upk1b	Insrr	0	M0039	0.0528201
Upk1b	Crybb3	0	M0039	0.0731209
Upk1b	Adra2c	0	M0039	0.0345067
Upk1b	Ibsp	0	M0039	0.0542309
Upk1b	Ptprf	0	M0039	0.0771543
Upk1b	Ttc12	0	M0039	0.00809102
Upk1b	Itih3	0	M0039	0.0523287
Upk1b	Cps1	0	M0039	0.0124337
Upk1b	Podn	0	M0039	0.0517007
Upk1b	Scn3b	0	M0039	0.0134185
Upk1b	Ass1	0	M0039	0.0623567
Upk1b	Il3ra	0	M0039	0.0263082
Upk1b	Serpina1d	0	M0039	0.0160992
Upk1b	Serpinb6b	0	M0039	0.00756785
Upk1b	Gjb3	0	M0039	0.0516253
Upk1b	Il17re	0	M0039	0.154495
Upk1b	Enpp5	0	M0039	0.0666419
Upk1b	Gyk	0	M0039	0.0162781
Upk1b	Mbd2	0	M0039	0.019436
Upk1b	Slc22a18	0	M0039	0.121807
Upk1b	Gzmk	0	M0039	0.0243334
Upk1b	Efemp1	0	M0039	0.0402461
Upk1b	Fetub	0	M0039	0.0643861
Upk1b	Igfbp2	0	M0039	0.0688471
Upk1b	Ank1	0	M0039	0.011639
Upk1b	Ngb	0	M0039	0.0770273
Upk1b	Yars	0	M0039	0.03407
Upk1b	Prkar1b	0	M0039	0.0703579
Upk1b	Slc6a4	0	M0039	0.0507754
Upk1b	A230065H16Rik	0	M0039	0.0497055
Upk1b	Cbs	0	M0039	0.0470283
Upk1b	Prnd	0	M0039	0.022053
Upk1b	Capn9	0	M0039	0.0321781
Upk1b	4930438A08Rik	0	M0039	0.0243065
Upk1b	Olfr667	0	M0039	0.00117831
Upk1b	Rgs7	0	M0039	0.058567
Upk1b	Myo3a	0	M0039	0.0106587
Upk1b	Sf3a2	0	M0039	0.0410976
Upk1b	Bglap2	0	M0039	0.019971
Upk1b	Ache	0	M0039	0.145448
Upk1b	4632427E13Rik	0	M0039	0.0206755
Upk1b	Fcer1a	0	M0039	0.0740666
Upk1b	9330182L06Rik	0	M0039	0.0643377
Upk1b	Atp1b4	0	M0039	0.129178
Upk1b	Nfasc	0	M0039	0.101255
Upk1b	Calb1	0	M0039	0.0769306
Upk1b	Mpp2	0	M0039	0.17267
Upk1b	Nrap	0	M0039	0.0542995
Upk1b	Glipr2	0	M0039	0.0238164
Upk1b	Tcrb-J	0	M0039	0.0513276
Upk1b	Tgfbr3	0	M0039	0.103959
Upk1b	Fez1	0	M0039	0.066238
Upk1b	Hao1	0	M0039	0.147524
Upk1b	Ccnd1	0	M0039	0.0311598
Upk1b	Cdh3	0	M0039	0.0706436
Upk1b	Kctd12	0	M0039	0.0805738
Coch	Fcna	0	M0039	0.0176762
Coch	Card14	0	M0039	0.103729
Coch	Mcpt4	0	M0039	0.178035
Coch	Pkp1	0	M0039	0.0958545
Coch	Kcne1l	0	M0039	0.0294617
Coch	Gdf10	0	M0039	0.137614
Coch	Adcy1	0	M0039	0.184561
Coch	Anxa8	0	M0039	0.146623
Coch	Fmod	0	M0039	0.19719
Coch	Cpa3	0	M0039	0.112695
Coch	Pi15	0	M0039	0.0559998
Coch	Ptgs2	0	M0039	0.0324889
Coch	Retnla	0	M0039	0.0724013
Coch	Rgs1	0	M0039	0.0460324
Coch	Crym	0	M0039	0.0326888
Coch	Acr	0	M0039	0.037695
Coch	Olfr575	0	M0039	0.025478
Coch	Plcb1	0	M0039	0.0741144
Coch	Ier3	0	M0039	0.0353805
Coch	Arg1	0	M0039	0.0209081
Coch	Atp8a2	0	M0039	0.0352218
Coch	Nid2	0	M0039	0.0288397
Coch	Syt10	0	M0039	0.0653268
Coch	Ccl24	0	M0039	0.0576009
Coch	1700025G04Rik	0	M0039	0.0431885
Coch	Scn1b	0	M0039	0.0549853
Coch	Svs5	0	M0039	0.0827629
Coch	Slc25a30	0	M0039	0.109873
Coch	Hic1	0	M0039	0.187195
Coch	Fads1	0	M0039	0.113459
Coch	Tnfaip2	0	M0039	0.0567948
Coch	Myoc	0	M0039	0.174204
Coch	Coq3	0	M0039	0.067805
Coch	Scx	0	M0039	0.0743163
Coch	Acsl6	0	M0039	0.128148
Coch	Rasa4	0	M0039	0.131405
Coch	4931428L18Rik	0	M0039	0.0327098
Coch	Rarres1	0	M0039	0.173006
Coch	Pcdhb6	0	M0039	0.115581
Coch	Ahsg	0	M0039	0.134626
Coch	Mmp20	0	M0039	0.0498731
Coch	Gpnmb	0	M0039	0.14282
Coch	Dpp7	0	M0039	0.0336362
Coch	Glra1	0	M0039	0.0755953
Coch	Ear11	0	M0039	0.0203899
Coch	Gdap1	0	M0039	0.13752
Coch	Homer3	0	M0039	0.128061
Coch	Agxt	0	M0039	0.0421941
Coch	Rfx4	0	M0039	0.100399
Coch	Cacna2d3	0	M0039	0.161821
Coch	Cst9	0	M0039	0.0683916
Coch	P2rx7	0	M0039	0.101698
Coch	Mx2	0	M0039	0.151204
Coch	Trpc4	0	M0039	0.0494639
Coch	Ankrd1	0	M0039	0.0171735
Coch	Hspa8	0	M0039	0.0655456
Coch	Dbnl	0	M0039	0.105003
Coch	Plekhb2	0	M0039	0.0685741
Coch	Slc6a15	0	M0039	0.0284062
Coch	Uchl1	0	M0039	0.0545673
Coch	Igfbp4	0	M0039	0.171034
Coch	Ece2	0	M0039	0.0401159
Coch	Fbln5	0	M0039	0.128314
Coch	4932414N04Rik	0	M0039	0.0170325
Coch	Crlf1	0	M0039	0.0367194
Coch	Foxn2	0	M0039	0.0361142
Coch	Cntn6	0	M0039	0.0791352
Coch	Ctdsp2	0	M0039	0.114177
Coch	Slpi	0	M0039	0.0241437
Coch	Kif1a	0	M0039	0.158357
Coch	Cpxm2	0	M0039	0.144861
Coch	BC026585	0	M0039	0.173755
Coch	Bid	0	M0039	0.0654469
Coch	Pdxp	0	M0039	0.0383305
Coch	Htr1a	0	M0039	0.0593403
Coch	Icam1	0	M0039	0.0827269
Coch	Skiv2l	0	M0039	0.251105
Coch	Il28ra	0	M0039	0.133795
Coch	Aamp	0	M0039	0.1328
Coch	Trim9	0	M0039	0.0385393
Coch	Pak1	0	M0039	0.171022
Coch	4933402N03Rik	0	M0039	0.0393587
Coch	Cacng5	0	M0039	0.0149931
Coch	Rtn4rl1	0	M0039	0.102098
Coch	D430019H16Rik	0	M0039	0.0308529
Coch	Arid3a	0	M0039	0.0808303
Coch	Spry1	0	M0039	0.0565145
Coch	Wt1	0	M0039	0.0638334
Coch	Mlana	0	M0039	0.125522
Coch	Etv4	0	M0039	0.131388
Coch	Cntn1	0	M0039	0.0295584
Coch	Cxcr6	0	M0039	0.0481949
Coch	Folh1	0	M0039	0.050803
Coch	1700015G11Rik	0	M0039	0.0298493
Coch	Cyp2s1	0	M0039	0.0459345
Coch	Bai2	0	M0039	0.053734
Coch	Abcc6	0	M0039	0.0566828
Coch	F3	0	M0039	0.160176
Coch	Tnr	0	M0039	0.0461197
Coch	Clic3	0	M0039	0.0833768
Coch	Olfr1265	0	M0039	0.0399713
Coch	Olfr1052	0	M0039	0.139229
Coch	Insrr	0	M0039	0.0799632
Coch	Crybb3	0	M0039	0.113525
Coch	Adra2c	0	M0039	0.130032
Coch	Ibsp	0	M0039	0.13208
Coch	Ptprf	0	M0039	0.056099
Coch	Ttc12	0	M0039	0.034921
Coch	Itih3	0	M0039	0.0956052
Coch	Cps1	0	M0039	0.101179
Coch	Podn	0	M0039	0.0197885
Coch	Scn3b	0	M0039	0.0606513
Coch	Ass1	0	M0039	0.16765
Coch	Il3ra	0	M0039	0.0362874
Coch	Serpina1d	0	M0039	0.0278802
Coch	Serpinb6b	0	M0039	0.0363827
Coch	Gjb3	0	M0039	0.0891496
Coch	Il17re	0	M0039	0.0900301
Coch	Enpp5	0	M0039	0.12544
Coch	Gyk	0	M0039	0.0319639
Coch	Mbd2	0	M0039	0.0316735
Coch	Slc22a18	0	M0039	0.142985
Coch	Gzmk	0	M0039	0.0101776
Coch	Efemp1	0	M0039	0.12653
Coch	Fetub	0	M0039	0.0795134
Coch	Igfbp2	0	M0039	0.0557711
Coch	Ank1	0	M0039	0.0180679
Coch	Ngb	0	M0039	0.16587
Coch	Yars	0	M0039	0.0227029
Coch	Prkar1b	0	M0039	0.152358
Coch	Slc6a4	0	M0039	0.130542
Coch	A230065H16Rik	0	M0039	0.168708
Coch	Cbs	0	M0039	0.00967157
Coch	Prnd	0	M0039	0.0529134
Coch	Capn9	0	M0039	0.0282231
Coch	4930438A08Rik	0	M0039	0.0351038
Coch	Olfr667	0	M0039	0.019396
Coch	Rgs7	0	M0039	0.060887
Coch	Myo3a	0	M0039	0.0798926
Coch	Sf3a2	0	M0039	0.087313
Coch	Bglap2	0	M0039	0.0221837
Coch	Ache	0	M0039	0.0552625
Coch	4632427E13Rik	0	M0039	0.0803159
Coch	Fcer1a	0	M0039	0.153292
Coch	9330182L06Rik	0	M0039	0.0728662
Coch	Atp1b4	0	M0039	0.0485811
Coch	Nfasc	0	M0039	0.134413
Coch	Calb1	0	M0039	0.0533574
Coch	Mpp2	0	M0039	0.0301694
Coch	Nrap	0	M0039	0.046747
Coch	Glipr2	0	M0039	0.0415456
Coch	Tcrb-J	0	M0039	0.151468
Coch	Tgfbr3	0	M0039	0.058925
Coch	Fez1	0	M0039	0.172878
Coch	Hao1	0	M0039	0.0364869
Coch	Ccnd1	0	M0039	0.0807319
Coch	Cdh3	0	M0039	0.0436786
Coch	Kctd12	0	M0039	0.196743
Fcna	Card14	0	M0039	0.0878447
Fcna	Mcpt4	0	M0039	0.0622308
Fcna	Pkp1	0	M0039	0.0359522
Fcna	Kcne1l	0	M0039	0.0170175
Fcna	Gdf10	0	M0039	0.14016
Fcna	Adcy1	0	M0039	0.0883783
Fcna	Anxa8	0	M0039	0.0290619
Fcna	Fmod	0	M0039	0.119543
Fcna	Cpa3	0	M0039	0.083339
Fcna	Pi15	0	M0039	0.0390445
Fcna	Ptgs2	0	M0039	0.017435
Fcna	Retnla	0	M0039	0.215883
Fcna	Rgs1	0	M0039	0.0740351
Fcna	Crym	0	M0039	0.017275
Fcna	Acr	0	M0039	0.0379566
Fcna	Olfr575	0	M0039	0.0209878
Fcna	Plcb1	0	M0039	0.0466774
Fcna	Ier3	0	M0039	0.0177863
Fcna	Arg1	0	M0039	0.0114062
Fcna	Atp8a2	0	M0039	0.00609145
Fcna	Nid2	0	M0039	0.0330464
Fcna	Syt10	0	M0039	0.0146065
Fcna	Ccl24	0	M0039	0.13701
Fcna	1700025G04Rik	0	M0039	0.00797353
Fcna	Scn1b	0	M0039	0.124611
Fcna	Svs5	0	M0039	0.0639382
Fcna	Slc25a30	0	M0039	0.0634343
Fcna	Hic1	0	M0039	0.0961115
Fcna	Fads1	0	M0039	0.0138924
Fcna	Tnfaip2	0	M0039	0.0752394
Fcna	Myoc	0	M0039	0.151052
Fcna	Coq3	0	M0039	0.0530805
Fcna	Scx	0	M0039	0.087819
Fcna	Acsl6	0	M0039	0.0292873
Fcna	Rasa4	0	M0039	0.184747
Fcna	4931428L18Rik	0	M0039	0.00492026
Fcna	Rarres1	0	M0039	0.111313
Fcna	Pcdhb6	0	M0039	0.0353104
Fcna	Ahsg	0	M0039	0.137684
Fcna	Mmp20	0	M0039	0.0219493
Fcna	Gpnmb	0	M0039	0.150636
Fcna	Dpp7	0	M0039	0.120029
Fcna	Glra1	0	M0039	0.0157231
Fcna	Ear11	0	M0039	0.15606
Fcna	Gdap1	0	M0039	0.11317
Fcna	Homer3	0	M0039	0.122131
Fcna	Agxt	0	M0039	0.0873936
Fcna	Rfx4	0	M0039	0.0647489
Fcna	Cacna2d3	0	M0039	0.115412
Fcna	Cst9	0	M0039	0.0690498
Fcna	P2rx7	0	M0039	0.162212
Fcna	Mx2	0	M0039	0.075929
Fcna	Trpc4	0	M0039	0.0172095
Fcna	Ankrd1	0	M0039	0.126135
Fcna	Hspa8	0	M0039	0.0385193
Fcna	Dbnl	0	M0039	0.0173874
Fcna	Plekhb2	0	M0039	0.0532873
Fcna	Slc6a15	0	M0039	0.0294774
Fcna	Uchl1	0	M0039	0.0626823
Fcna	Igfbp4	0	M0039	0.134743
Fcna	Ece2	0	M0039	0.102629
Fcna	Fbln5	0	M0039	0.0479543
Fcna	4932414N04Rik	0	M0039	0.0204939
Fcna	Crlf1	0	M0039	0.151025
Fcna	Foxn2	0	M0039	0.00290649
Fcna	Cntn6	0	M0039	0.0261997
Fcna	Ctdsp2	0	M0039	0.0369789
Fcna	Slpi	0	M0039	0.04054
Fcna	Kif1a	0	M0039	0.110079
Fcna	Cpxm2	0	M0039	0.146106
Fcna	BC026585	0	M0039	0.0440191
Fcna	Bid	0	M0039	0.0889893
Fcna	Pdxp	0	M0039	0.0116083
Fcna	Htr1a	0	M0039	0.0420072
Fcna	Icam1	0	M0039	0.060075
Fcna	Skiv2l	0	M0039	0.108338
Fcna	Il28ra	0	M0039	0.12251
Fcna	Aamp	0	M0039	0.074096
Fcna	Trim9	0	M0039	0.0654872
Fcna	Pak1	0	M0039	0.0513227
Fcna	4933402N03Rik	0	M0039	0.0223256
Fcna	Cacng5	0	M0039	0.0618507
Fcna	Rtn4rl1	0	M0039	0.0879475
Fcna	D430019H16Rik	0	M0039	0.0523934
Fcna	Arid3a	0	M0039	0.0270461
Fcna	Spry1	0	M0039	0.163954
Fcna	Wt1	0	M0039	0.0374257
Fcna	Mlana	0	M0039	0.0470973
Fcna	Etv4	0	M0039	0.0944001
Fcna	Cntn1	0	M0039	0.0589727
Fcna	Cxcr6	0	M0039	0.11634
Fcna	Folh1	0	M0039	0.0172762
Fcna	1700015G11Rik	0	M0039	0.0237212
Fcna	Cyp2s1	0	M0039	0.0140291
Fcna	Bai2	0	M0039	0.0321743
Fcna	Abcc6	0	M0039	0.0164532
Fcna	F3	0	M0039	0.107877
Fcna	Tnr	0	M0039	0.0536476
Fcna	Clic3	0	M0039	0.0140968
Fcna	Olfr1265	0	M0039	0.0179825
Fcna	Olfr1052	0	M0039	0.0501364
Fcna	Insrr	0	M0039	0.072994
Fcna	Crybb3	0	M0039	0.0936767
Fcna	Adra2c	0	M0039	0.0859049
Fcna	Ibsp	0	M0039	0.155294
Fcna	Ptprf	0	M0039	0.116619
Fcna	Ttc12	0	M0039	0.0794167
Fcna	Itih3	0	M0039	0.105609
Fcna	Cps1	0	M0039	0.029213
Fcna	Podn	0	M0039	0.0194267
Fcna	Scn3b	0	M0039	0.0251405
Fcna	Ass1	0	M0039	0.0492764
Fcna	Il3ra	0	M0039	0.0826134
Fcna	Serpina1d	0	M0039	0.170678
Fcna	Serpinb6b	0	M0039	0.0529722
Fcna	Gjb3	0	M0039	0.0106717
Fcna	Il17re	0	M0039	0.0364009
Fcna	Enpp5	0	M0039	0.149745
Fcna	Gyk	0	M0039	0.0319684
Fcna	Mbd2	0	M0039	0.0387437
Fcna	Slc22a18	0	M0039	0.0746134
Fcna	Gzmk	0	M0039	0.0384159
Fcna	Efemp1	0	M0039	0.121384
Fcna	Fetub	0	M0039	0.0889893
Fcna	Igfbp2	0	M0039	0.124316
Fcna	Ank1	0	M0039	0.0769795
Fcna	Ngb	0	M0039	0.0522234
Fcna	Yars	0	M0039	0.0934847
Fcna	Prkar1b	0	M0039	0.154394
Fcna	Slc6a4	0	M0039	0.138652
Fcna	A230065H16Rik	0	M0039	0.123942
Fcna	Cbs	0	M0039	0.0275761
Fcna	Prnd	0	M0039	0.00928783
Fcna	Capn9	0	M0039	0.104731
Fcna	4930438A08Rik	0	M0039	0.0106213
Fcna	Olfr667	0	M0039	0.0492449
Fcna	Rgs7	0	M0039	0.0811971
Fcna	Myo3a	0	M0039	0.0269892
Fcna	Sf3a2	0	M0039	0.0270885
Fcna	Bglap2	0	M0039	0.0321167
Fcna	Ache	0	M0039	0.0310102
Fcna	4632427E13Rik	0	M0039	0.033529
Fcna	Fcer1a	0	M0039	0.140708
Fcna	9330182L06Rik	0	M0039	0.145016
Fcna	Atp1b4	0	M0039	0.0309547
Fcna	Nfasc	0	M0039	0.105985
Fcna	Calb1	0	M0039	0.0423258
Fcna	Mpp2	0	M0039	0.00779578
Fcna	Nrap	0	M0039	0.0286398
Fcna	Glipr2	0	M0039	0.141646
Fcna	Tcrb-J	0	M0039	0.14724
Fcna	Tgfbr3	0	M0039	0.0813292
Fcna	Fez1	0	M0039	0.072599
Fcna	Hao1	0	M0039	0.0103582
Fcna	Ccnd1	0	M0039	0.230294
Fcna	Cdh3	0	M0039	0.0168897
Fcna	Kctd12	0	M0039	0.0970146
Card14	Mcpt4	0	M0039	0.110935
Card14	Pkp1	0	M0039	0.0951574
Card14	Kcne1l	0	M0039	0.0478235
Card14	Gdf10	0	M0039	0.179982
Card14	Adcy1	0	M0039	0.15859
Card14	Anxa8	0	M0039	0.0581295
Card14	Fmod	0	M0039	0.21252
Card14	Cpa3	0	M0039	0.0903844
Card14	Pi15	0	M0039	0.0410535
Card14	Ptgs2	0	M0039	0.100056
Card14	Retnla	0	M0039	0.116032
Card14	Rgs1	0	M0039	0.144281
Card14	Crym	0	M0039	0.0324596
Card14	Acr	0	M0039	0.0525379
Card14	Olfr575	0	M0039	0.0307117
Card14	Plcb1	0	M0039	0.0932726
Card14	Ier3	0	M0039	0.0852027
Card14	Arg1	0	M0039	0.0311255
Card14	Atp8a2	0	M0039	0.0536868
Card14	Nid2	0	M0039	0.0479729
Card14	Syt10	0	M0039	0.0260424
Card14	Ccl24	0	M0039	0.0796805
Card14	1700025G04Rik	0	M0039	0.0664639
Card14	Scn1b	0	M0039	0.0945326
Card14	Svs5	0	M0039	0.184117
Card14	Slc25a30	0	M0039	0.0979474
Card14	Hic1	0	M0039	0.144667
Card14	Fads1	0	M0039	0.0627371
Card14	Tnfaip2	0	M0039	0.107359
Card14	Myoc	0	M0039	0.245943
Card14	Coq3	0	M0039	0.102583
Card14	Scx	0	M0039	0.113454
Card14	Acsl6	0	M0039	0.0800174
Card14	Rasa4	0	M0039	0.190589
Card14	4931428L18Rik	0	M0039	0.06719
Card14	Rarres1	0	M0039	0.167146
Card14	Pcdhb6	0	M0039	0.0778656
Card14	Ahsg	0	M0039	0.16289
Card14	Mmp20	0	M0039	0.0369326
Card14	Gpnmb	0	M0039	0.171735
Card14	Dpp7	0	M0039	0.112383
Card14	Glra1	0	M0039	0.0566961
Card14	Ear11	0	M0039	0.0716459
Card14	Gdap1	0	M0039	0.185069
Card14	Homer3	0	M0039	0.123507
Card14	Agxt	0	M0039	0.0473575
Card14	Rfx4	0	M0039	0.12054
Card14	Cacna2d3	0	M0039	0.186182
Card14	Cst9	0	M0039	0.0759323
Card14	P2rx7	0	M0039	0.142454
Card14	Mx2	0	M0039	0.121576
Card14	Trpc4	0	M0039	0.0711298
Card14	Ankrd1	0	M0039	0.0580376
Card14	Hspa8	0	M0039	0.0843339
Card14	Dbnl	0	M0039	0.0480599
Card14	Plekhb2	0	M0039	0.0764235
Card14	Slc6a15	0	M0039	0.111021
Card14	Uchl1	0	M0039	0.101497
Card14	Igfbp4	0	M0039	0.174354
Card14	Ece2	0	M0039	0.142053
Card14	Fbln5	0	M0039	0.108873
Card14	4932414N04Rik	0	M0039	0.0321794
Card14	Crlf1	0	M0039	0.111584
Card14	Foxn2	0	M0039	0.0292652
Card14	Cntn6	0	M0039	0.0909578
Card14	Ctdsp2	0	M0039	0.0565504
Card14	Slpi	0	M0039	0.0416567
Card14	Kif1a	0	M0039	0.171926
Card14	Cpxm2	0	M0039	0.178372
Card14	BC026585	0	M0039	0.0912574
Card14	Bid	0	M0039	0.112308
Card14	Pdxp	0	M0039	0.0360412
Card14	Htr1a	0	M0039	0.0884817
Card14	Icam1	0	M0039	0.128542
Card14	Skiv2l	0	M0039	0.19523
Card14	Il28ra	0	M0039	0.171706
Card14	Aamp	0	M0039	0.103225
Card14	Trim9	0	M0039	0.051391
Card14	Pak1	0	M0039	0.147446
Card14	4933402N03Rik	0	M0039	0.0936898
Card14	Cacng5	0	M0039	0.0637758
Card14	Rtn4rl1	0	M0039	0.133741
Card14	D430019H16Rik	0	M0039	0.0580877
Card14	Arid3a	0	M0039	0.0757669
Card14	Spry1	0	M0039	0.135335
Card14	Wt1	0	M0039	0.0448742
Card14	Mlana	0	M0039	0.095292
Card14	Etv4	0	M0039	0.137248
Card14	Cntn1	0	M0039	0.0672494
Card14	Cxcr6	0	M0039	0.0882863
Card14	Folh1	0	M0039	0.0717904
Card14	1700015G11Rik	0	M0039	0.0547384
Card14	Cyp2s1	0	M0039	0.0337487
Card14	Bai2	0	M0039	0.0350494
Card14	Abcc6	0	M0039	0.139482
Card14	F3	0	M0039	0.190611
Card14	Tnr	0	M0039	0.122902
Card14	Clic3	0	M0039	0.0610066
Card14	Olfr1265	0	M0039	0.0434363
Card14	Olfr1052	0	M0039	0.114215
Card14	Insrr	0	M0039	0.0727685
Card14	Crybb3	0	M0039	0.111729
Card14	Adra2c	0	M0039	0.146298
Card14	Ibsp	0	M0039	0.172202
Card14	Ptprf	0	M0039	0.0772923
Card14	Ttc12	0	M0039	0.14142
Card14	Itih3	0	M0039	0.137749
Card14	Cps1	0	M0039	0.099117
Card14	Podn	0	M0039	0.0152334
Card14	Scn3b	0	M0039	0.0789381
Card14	Ass1	0	M0039	0.130458
Card14	Il3ra	0	M0039	0.135787
Card14	Serpina1d	0	M0039	0.10723
Card14	Serpinb6b	0	M0039	0.144603
Card14	Gjb3	0	M0039	0.0727489
Card14	Il17re	0	M0039	0.0701761
Card14	Enpp5	0	M0039	0.184068
Card14	Gyk	0	M0039	0.0618904
Card14	Mbd2	0	M0039	0.09933
Card14	Slc22a18	0	M0039	0.134476
Card14	Gzmk	0	M0039	0.0437833
Card14	Efemp1	0	M0039	0.1675
Card14	Fetub	0	M0039	0.104287
Card14	Igfbp2	0	M0039	0.104262
Card14	Ank1	0	M0039	0.0525374
Card14	Ngb	0	M0039	0.141612
Card14	Yars	0	M0039	0.0541565
Card14	Prkar1b	0	M0039	0.17828
Card14	Slc6a4	0	M0039	0.128899
Card14	A230065H16Rik	0	M0039	0.180491
Card14	Cbs	0	M0039	0.020468
Card14	Prnd	0	M0039	0.0616585
Card14	Capn9	0	M0039	0.0511037
Card14	4930438A08Rik	0	M0039	0.0896632
Card14	Olfr667	0	M0039	0.164873
Card14	Rgs7	0	M0039	0.123325
Card14	Myo3a	0	M0039	0.110221
Card14	Sf3a2	0	M0039	0.0910675
Card14	Bglap2	0	M0039	0.0488859
Card14	Ache	0	M0039	0.0589221
Card14	4632427E13Rik	0	M0039	0.130313
Card14	Fcer1a	0	M0039	0.123264
Card14	9330182L06Rik	0	M0039	0.109261
Card14	Atp1b4	0	M0039	0.0431376
Card14	Nfasc	0	M0039	0.156566
Card14	Calb1	0	M0039	0.0526875
Card14	Mpp2	0	M0039	0.0130595
Card14	Nrap	0	M0039	0.0520633
Card14	Glipr2	0	M0039	0.0951814
Card14	Tcrb-J	0	M0039	0.162199
Card14	Tgfbr3	0	M0039	0.0661875
Card14	Fez1	0	M0039	0.185997
Card14	Hao1	0	M0039	0.0370384
Card14	Ccnd1	0	M0039	0.132996
Card14	Cdh3	0	M0039	0.0349677
Card14	Kctd12	0	M0039	0.192489
Mcpt4	Pkp1	0	M0039	0.0685591
Mcpt4	Kcne1l	0	M0039	0.0917952
Mcpt4	Gdf10	0	M0039	0.225748
Mcpt4	Adcy1	0	M0039	0.254229
Mcpt4	Anxa8	0	M0039	0.136646
Mcpt4	Fmod	0	M0039	0.246227
Mcpt4	Cpa3	0	M0039	0.203898
Mcpt4	Pi15	0	M0039	0.115558
Mcpt4	Ptgs2	0	M0039	0.0438618
Mcpt4	Retnla	0	M0039	0.145301
Mcpt4	Rgs1	0	M0039	0.044654
Mcpt4	Crym	0	M0039	0.0469909
Mcpt4	Acr	0	M0039	0.0880559
Mcpt4	Olfr575	0	M0039	0.0372186
Mcpt4	Plcb1	0	M0039	0.147658
Mcpt4	Ier3	0	M0039	0.0575369
Mcpt4	Arg1	0	M0039	0.0319214
Mcpt4	Atp8a2	0	M0039	0.0300184
Mcpt4	Nid2	0	M0039	0.0441622
Mcpt4	Syt10	0	M0039	0.108868
Mcpt4	Ccl24	0	M0039	0.137514
Mcpt4	1700025G04Rik	0	M0039	0.104053
Mcpt4	Scn1b	0	M0039	0.0922602
Mcpt4	Svs5	0	M0039	0.105732
Mcpt4	Slc25a30	0	M0039	0.13664
Mcpt4	Hic1	0	M0039	0.22394
Mcpt4	Fads1	0	M0039	0.0944947
Mcpt4	Tnfaip2	0	M0039	0.120643
Mcpt4	Myoc	0	M0039	0.213288
Mcpt4	Coq3	0	M0039	0.14021
Mcpt4	Scx	0	M0039	0.123285
Mcpt4	Acsl6	0	M0039	0.147956
Mcpt4	Rasa4	0	M0039	0.186586
Mcpt4	4931428L18Rik	0	M0039	0.0589863
Mcpt4	Rarres1	0	M0039	0.221111
Mcpt4	Pcdhb6	0	M0039	0.097964
Mcpt4	Ahsg	0	M0039	0.230975
Mcpt4	Mmp20	0	M0039	0.052273
Mcpt4	Gpnmb	0	M0039	0.181496
Mcpt4	Dpp7	0	M0039	0.080447
Mcpt4	Glra1	0	M0039	0.0726723
Mcpt4	Ear11	0	M0039	0.0773181
Mcpt4	Gdap1	0	M0039	0.204373
Mcpt4	Homer3	0	M0039	0.150347
Mcpt4	Agxt	0	M0039	0.100168
Mcpt4	Rfx4	0	M0039	0.173858
Mcpt4	Cacna2d3	0	M0039	0.216085
Mcpt4	Cst9	0	M0039	0.0942838
Mcpt4	P2rx7	0	M0039	0.149588
Mcpt4	Mx2	0	M0039	0.154471
Mcpt4	Trpc4	0	M0039	0.0541641
Mcpt4	Ankrd1	0	M0039	0.0756837
Mcpt4	Hspa8	0	M0039	0.0897385
Mcpt4	Dbnl	0	M0039	0.0720433
Mcpt4	Plekhb2	0	M0039	0.11972
Mcpt4	Slc6a15	0	M0039	0.0406177
Mcpt4	Uchl1	0	M0039	0.110026
Mcpt4	Igfbp4	0	M0039	0.230905
Mcpt4	Ece2	0	M0039	0.0529107
Mcpt4	Fbln5	0	M0039	0.164204
Mcpt4	4932414N04Rik	0	M0039	0.0460529
Mcpt4	Crlf1	0	M0039	0.100458
Mcpt4	Foxn2	0	M0039	0.0297874
Mcpt4	Cntn6	0	M0039	0.0888853
Mcpt4	Ctdsp2	0	M0039	0.155483
Mcpt4	Slpi	0	M0039	0.0849268
Mcpt4	Kif1a	0	M0039	0.208273
Mcpt4	Cpxm2	0	M0039	0.240811
Mcpt4	BC026585	0	M0039	0.178811
Mcpt4	Bid	0	M0039	0.112982
Mcpt4	Pdxp	0	M0039	0.0667758
Mcpt4	Htr1a	0	M0039	0.115906
Mcpt4	Icam1	0	M0039	0.127169
Mcpt4	Skiv2l	0	M0039	0.246633
Mcpt4	Il28ra	0	M0039	0.120384
Mcpt4	Aamp	0	M0039	0.194723
Mcpt4	Trim9	0	M0039	0.0799729
Mcpt4	Pak1	0	M0039	0.155437
Mcpt4	4933402N03Rik	0	M0039	0.0491374
Mcpt4	Cacng5	0	M0039	0.0680533
Mcpt4	Rtn4rl1	0	M0039	0.144087
Mcpt4	D430019H16Rik	0	M0039	0.0760302
Mcpt4	Arid3a	0	M0039	0.0661254
Mcpt4	Spry1	0	M0039	0.12923
Mcpt4	Wt1	0	M0039	0.111262
Mcpt4	Mlana	0	M0039	0.156371
Mcpt4	Etv4	0	M0039	0.163913
Mcpt4	Cntn1	0	M0039	0.0954219
Mcpt4	Cxcr6	0	M0039	0.109202
Mcpt4	Folh1	0	M0039	0.0759876
Mcpt4	1700015G11Rik	0	M0039	0.0980732
Mcpt4	Cyp2s1	0	M0039	0.0807955
Mcpt4	Bai2	0	M0039	0.106229
Mcpt4	Abcc6	0	M0039	0.0496458
Mcpt4	F3	0	M0039	0.201467
Mcpt4	Tnr	0	M0039	0.101631
Mcpt4	Clic3	0	M0039	0.0904021
Mcpt4	Olfr1265	0	M0039	0.0364897
Mcpt4	Olfr1052	0	M0039	0.0973828
Mcpt4	Insrr	0	M0039	0.128373
Mcpt4	Crybb3	0	M0039	0.152219
Mcpt4	Adra2c	0	M0039	0.111985
Mcpt4	Ibsp	0	M0039	0.20207
Mcpt4	Ptprf	0	M0039	0.143632
Mcpt4	Ttc12	0	M0039	0.0624719
Mcpt4	Itih3	0	M0039	0.148531
Mcpt4	Cps1	0	M0039	0.16666
Mcpt4	Podn	0	M0039	0.0568202
Mcpt4	Scn3b	0	M0039	0.120005
Mcpt4	Ass1	0	M0039	0.195099
Mcpt4	Il3ra	0	M0039	0.0785673
Mcpt4	Serpina1d	0	M0039	0.081348
Mcpt4	Serpinb6b	0	M0039	0.0365503
Mcpt4	Gjb3	0	M0039	0.0746711
Mcpt4	Il17re	0	M0039	0.131525
Mcpt4	Enpp5	0	M0039	0.153026
Mcpt4	Gyk	0	M0039	0.0301548
Mcpt4	Mbd2	0	M0039	0.0607514
Mcpt4	Slc22a18	0	M0039	0.21339
Mcpt4	Gzmk	0	M0039	0.0485728
Mcpt4	Efemp1	0	M0039	0.189871
Mcpt4	Fetub	0	M0039	0.153858
Mcpt4	Igfbp2	0	M0039	0.0931985
Mcpt4	Ank1	0	M0039	0.0456416
Mcpt4	Ngb	0	M0039	0.172046
Mcpt4	Yars	0	M0039	0.0804155
Mcpt4	Prkar1b	0	M0039	0.261698
Mcpt4	Slc6a4	0	M0039	0.136674
Mcpt4	A230065H16Rik	0	M0039	0.247245
Mcpt4	Cbs	0	M0039	0.0521976
Mcpt4	Prnd	0	M0039	0.0715135
Mcpt4	Capn9	0	M0039	0.0960064
Mcpt4	4930438A08Rik	0	M0039	0.0637589
Mcpt4	Olfr667	0	M0039	0.0277225
Mcpt4	Rgs7	0	M0039	0.0982969
Mcpt4	Myo3a	0	M0039	0.0906476
Mcpt4	Sf3a2	0	M0039	0.0764702
Mcpt4	Bglap2	0	M0039	0.103424
Mcpt4	Ache	0	M0039	0.100084
Mcpt4	4632427E13Rik	0	M0039	0.121111
Mcpt4	Fcer1a	0	M0039	0.220395
Mcpt4	9330182L06Rik	0	M0039	0.106425
Mcpt4	Atp1b4	0	M0039	0.101156
Mcpt4	Nfasc	0	M0039	0.196268
Mcpt4	Calb1	0	M0039	0.0591189
Mcpt4	Mpp2	0	M0039	0.0576636
Mcpt4	Nrap	0	M0039	0.0728476
Mcpt4	Glipr2	0	M0039	0.0800667
Mcpt4	Tcrb-J	0	M0039	0.18117
Mcpt4	Tgfbr3	0	M0039	0.111122
Mcpt4	Fez1	0	M0039	0.17782
Mcpt4	Hao1	0	M0039	0.0870191
Mcpt4	Ccnd1	0	M0039	0.154398
Mcpt4	Cdh3	0	M0039	0.118895
Mcpt4	Kctd12	0	M0039	0.231868
Pkp1	Kcne1l	0	M0039	0.049173
Pkp1	Gdf10	0	M0039	0.0567445
Pkp1	Adcy1	0	M0039	0.0854159
Pkp1	Anxa8	0	M0039	0.0872512
Pkp1	Fmod	0	M0039	0.0787312
Pkp1	Cpa3	0	M0039	0.0558384
Pkp1	Pi15	0	M0039	0.0350002
Pkp1	Ptgs2	0	M0039	0.110141
Pkp1	Retnla	0	M0039	0.0403815
Pkp1	Rgs1	0	M0039	0.060347
Pkp1	Crym	0	M0039	0.0850214
Pkp1	Acr	0	M0039	0.0435159
Pkp1	Olfr575	0	M0039	0.0815147
Pkp1	Plcb1	0	M0039	0.0432819
Pkp1	Ier3	0	M0039	0.104482
Pkp1	Arg1	0	M0039	0.123999
Pkp1	Atp8a2	0	M0039	0.201813
Pkp1	Nid2	0	M0039	0.0825301
Pkp1	Syt10	0	M0039	0.0544895
Pkp1	Ccl24	0	M0039	0.0579064
Pkp1	1700025G04Rik	0	M0039	0.0803259
Pkp1	Scn1b	0	M0039	0.0699649
Pkp1	Svs5	0	M0039	0.0975668
Pkp1	Slc25a30	0	M0039	0.0657619
Pkp1	Hic1	0	M0039	0.0888575
Pkp1	Fads1	0	M0039	0.132487
Pkp1	Tnfaip2	0	M0039	0.0867586
Pkp1	Myoc	0	M0039	0.103317
Pkp1	Coq3	0	M0039	0.090119
Pkp1	Scx	0	M0039	0.0760703
Pkp1	Acsl6	0	M0039	0.0839122
Pkp1	Rasa4	0	M0039	0.0996899
Pkp1	4931428L18Rik	0	M0039	0.0911224
Pkp1	Rarres1	0	M0039	0.065362
Pkp1	Pcdhb6	0	M0039	0.137734
Pkp1	Ahsg	0	M0039	0.073665
Pkp1	Mmp20	0	M0039	0.0542216
Pkp1	Gpnmb	0	M0039	0.100824
Pkp1	Dpp7	0	M0039	0.0644346
Pkp1	Glra1	0	M0039	0.110026
Pkp1	Ear11	0	M0039	0.0192887
Pkp1	Gdap1	0	M0039	0.0935702
Pkp1	Homer3	0	M0039	0.0701085
Pkp1	Agxt	0	M0039	0.0389493
Pkp1	Rfx4	0	M0039	0.0807103
Pkp1	Cacna2d3	0	M0039	0.0871856
Pkp1	Cst9	0	M0039	0.0725067
Pkp1	P2rx7	0	M0039	0.0450504
Pkp1	Mx2	0	M0039	0.0921947
Pkp1	Trpc4	0	M0039	0.191858
Pkp1	Ankrd1	0	M0039	0.0340559
Pkp1	Hspa8	0	M0039	0.105375
Pkp1	Dbnl	0	M0039	0.108527
Pkp1	Plekhb2	0	M0039	0.0847734
Pkp1	Slc6a15	0	M0039	0.130455
Pkp1	Uchl1	0	M0039	0.0828271
Pkp1	Igfbp4	0	M0039	0.158202
Pkp1	Ece2	0	M0039	0.0503796
Pkp1	Fbln5	0	M0039	0.0671212
Pkp1	4932414N04Rik	0	M0039	0.025729
Pkp1	Crlf1	0	M0039	0.0417994
Pkp1	Foxn2	0	M0039	0.138045
Pkp1	Cntn6	0	M0039	0.121323
Pkp1	Ctdsp2	0	M0039	0.0575263
Pkp1	Slpi	0	M0039	0.0396208
Pkp1	Kif1a	0	M0039	0.0951108
Pkp1	Cpxm2	0	M0039	0.0659547
Pkp1	BC026585	0	M0039	0.05544
Pkp1	Bid	0	M0039	0.0423885
Pkp1	Pdxp	0	M0039	0.03198
Pkp1	Htr1a	0	M0039	0.0863588
Pkp1	Icam1	0	M0039	0.0610638
Pkp1	Skiv2l	0	M0039	0.130442
Pkp1	Il28ra	0	M0039	0.0692438
Pkp1	Aamp	0	M0039	0.10572
Pkp1	Trim9	0	M0039	0.060666
Pkp1	Pak1	0	M0039	0.0859583
Pkp1	4933402N03Rik	0	M0039	0.102505
Pkp1	Cacng5	0	M0039	0.0256264
Pkp1	Rtn4rl1	0	M0039	0.0891689
Pkp1	D430019H16Rik	0	M0039	0.0708173
Pkp1	Arid3a	0	M0039	0.160578
Pkp1	Spry1	0	M0039	0.0524994
Pkp1	Wt1	0	M0039	0.0529783
Pkp1	Mlana	0	M0039	0.0742497
Pkp1	Etv4	0	M0039	0.102835
Pkp1	Cntn1	0	M0039	0.0695104
Pkp1	Cxcr6	0	M0039	0.0320738
Pkp1	Folh1	0	M0039	0.123036
Pkp1	1700015G11Rik	0	M0039	0.0451735
Pkp1	Cyp2s1	0	M0039	0.0744345
Pkp1	Bai2	0	M0039	0.0555313
Pkp1	Abcc6	0	M0039	0.0735299
Pkp1	F3	0	M0039	0.0654027
Pkp1	Tnr	0	M0039	0.0895744
Pkp1	Clic3	0	M0039	0.0682451
Pkp1	Olfr1265	0	M0039	0.0633652
Pkp1	Olfr1052	0	M0039	0.12769
Pkp1	Insrr	0	M0039	0.0768681
Pkp1	Crybb3	0	M0039	0.083866
Pkp1	Adra2c	0	M0039	0.0506459
Pkp1	Ibsp	0	M0039	0.0861398
Pkp1	Ptprf	0	M0039	0.0467923
Pkp1	Ttc12	0	M0039	0.122602
Pkp1	Itih3	0	M0039	0.079488
Pkp1	Cps1	0	M0039	0.0630253
Pkp1	Podn	0	M0039	0.0325856
Pkp1	Scn3b	0	M0039	0.0810351
Pkp1	Ass1	0	M0039	0.0916547
Pkp1	Il3ra	0	M0039	0.0485904
Pkp1	Serpina1d	0	M0039	0.0436029
Pkp1	Serpinb6b	0	M0039	0.0802738
Pkp1	Gjb3	0	M0039	0.110413
Pkp1	Il17re	0	M0039	0.0563738
Pkp1	Enpp5	0	M0039	0.0736355
Pkp1	Gyk	0	M0039	0.0652064
Pkp1	Mbd2	0	M0039	0.126132
Pkp1	Slc22a18	0	M0039	0.0842081
Pkp1	Gzmk	0	M0039	0.0391634
Pkp1	Efemp1	0	M0039	0.0642147
Pkp1	Fetub	0	M0039	0.0528528
Pkp1	Igfbp2	0	M0039	0.0791069
Pkp1	Ank1	0	M0039	0.0488563
Pkp1	Ngb	0	M0039	0.104987
Pkp1	Yars	0	M0039	0.021497
Pkp1	Prkar1b	0	M0039	0.075773
Pkp1	Slc6a4	0	M0039	0.102464
Pkp1	A230065H16Rik	0	M0039	0.0652115
Pkp1	Cbs	0	M0039	0.0198583
Pkp1	Prnd	0	M0039	0.179731
Pkp1	Capn9	0	M0039	0.0255914
Pkp1	4930438A08Rik	0	M0039	0.120514
Pkp1	Olfr667	0	M0039	0.106139
Pkp1	Rgs7	0	M0039	0.0671431
Pkp1	Myo3a	0	M0039	0.0931747
Pkp1	Sf3a2	0	M0039	0.116209
Pkp1	Bglap2	0	M0039	0.069399
Pkp1	Ache	0	M0039	0.0445473
Pkp1	4632427E13Rik	0	M0039	0.135743
Pkp1	Fcer1a	0	M0039	0.0650205
Pkp1	9330182L06Rik	0	M0039	0.0482277
Pkp1	Atp1b4	0	M0039	0.0525705
Pkp1	Nfasc	0	M0039	0.0923048
Pkp1	Calb1	0	M0039	0.0484376
Pkp1	Mpp2	0	M0039	0.0598518
Pkp1	Nrap	0	M0039	0.0890624
Pkp1	Glipr2	0	M0039	0.0482929
Pkp1	Tcrb-J	0	M0039	0.125535
Pkp1	Tgfbr3	0	M0039	0.0284665
Pkp1	Fez1	0	M0039	0.0885793
Pkp1	Hao1	0	M0039	0.070493
Pkp1	Ccnd1	0	M0039	0.0429171
Pkp1	Cdh3	0	M0039	0.0480767
Pkp1	Kctd12	0	M0039	0.0983972
Kcne1l	Gdf10	0	M0039	0.0776796
Kcne1l	Adcy1	0	M0039	0.113866
Kcne1l	Anxa8	0	M0039	0.0824724
Kcne1l	Fmod	0	M0039	0.0954742
Kcne1l	Cpa3	0	M0039	0.058673
Kcne1l	Pi15	0	M0039	0.0361054
Kcne1l	Ptgs2	0	M0039	0.00836808
Kcne1l	Retnla	0	M0039	0.0642557
Kcne1l	Rgs1	0	M0039	0.0228617
Kcne1l	Crym	0	M0039	0.0606034
Kcne1l	Acr	0	M0039	0.0445246
Kcne1l	Olfr575	0	M0039	0.00994203
Kcne1l	Plcb1	0	M0039	0.0686514
Kcne1l	Ier3	0	M0039	0.0134202
Kcne1l	Arg1	0	M0039	0.0671661
Kcne1l	Atp8a2	0	M0039	0.0197812
Kcne1l	Nid2	0	M0039	0.06182
Kcne1l	Syt10	0	M0039	0.040178
Kcne1l	Ccl24	0	M0039	0.0671889
Kcne1l	1700025G04Rik	0	M0039	0.046044
Kcne1l	Scn1b	0	M0039	0.0426524
Kcne1l	Svs5	0	M0039	0.0448366
Kcne1l	Slc25a30	0	M0039	0.0461533
Kcne1l	Hic1	0	M0039	0.0996507
Kcne1l	Fads1	0	M0039	0.0740759
Kcne1l	Tnfaip2	0	M0039	0.0198431
Kcne1l	Myoc	0	M0039	0.0966556
Kcne1l	Coq3	0	M0039	0.0171052
Kcne1l	Scx	0	M0039	0.0680089
Kcne1l	Acsl6	0	M0039	0.139552
Kcne1l	Rasa4	0	M0039	0.0701386
Kcne1l	4931428L18Rik	0	M0039	0.0585798
Kcne1l	Rarres1	0	M0039	0.10338
Kcne1l	Pcdhb6	0	M0039	0.0506336
Kcne1l	Ahsg	0	M0039	0.136642
Kcne1l	Mmp20	0	M0039	0.048613
Kcne1l	Gpnmb	0	M0039	0.0526604
Kcne1l	Dpp7	0	M0039	0.0267789
Kcne1l	Glra1	0	M0039	0.11234
Kcne1l	Ear11	0	M0039	0.0336612
Kcne1l	Gdap1	0	M0039	0.0822921
Kcne1l	Homer3	0	M0039	0.0761652
Kcne1l	Agxt	0	M0039	0.0558802
Kcne1l	Rfx4	0	M0039	0.109098
Kcne1l	Cacna2d3	0	M0039	0.068404
Kcne1l	Cst9	0	M0039	0.0700919
Kcne1l	P2rx7	0	M0039	0.0609556
Kcne1l	Mx2	0	M0039	0.0444559
Kcne1l	Trpc4	0	M0039	0.0185324
Kcne1l	Ankrd1	0	M0039	0.0467891
Kcne1l	Hspa8	0	M0039	0.0405615
Kcne1l	Dbnl	0	M0039	0.105763
Kcne1l	Plekhb2	0	M0039	0.0722573
Kcne1l	Slc6a15	0	M0039	0.0112826
Kcne1l	Uchl1	0	M0039	0.0502054
Kcne1l	Igfbp4	0	M0039	0.125375
Kcne1l	Ece2	0	M0039	0.0179497
Kcne1l	Fbln5	0	M0039	0.185778
Kcne1l	4932414N04Rik	0	M0039	0.0219502
Kcne1l	Crlf1	0	M0039	0.0500648
Kcne1l	Foxn2	0	M0039	0.0309966
Kcne1l	Cntn6	0	M0039	0.0488212
Kcne1l	Ctdsp2	0	M0039	0.10466
Kcne1l	Slpi	0	M0039	0.0705019
Kcne1l	Kif1a	0	M0039	0.110099
Kcne1l	Cpxm2	0	M0039	0.0872376
Kcne1l	BC026585	0	M0039	0.0650039
Kcne1l	Bid	0	M0039	0.0290813
Kcne1l	Pdxp	0	M0039	0.0236048
Kcne1l	Htr1a	0	M0039	0.0325298
Kcne1l	Icam1	0	M0039	0.0565812
Kcne1l	Skiv2l	0	M0039	0.143604
Kcne1l	Il28ra	0	M0039	0.0686936
Kcne1l	Aamp	0	M0039	0.0854394
Kcne1l	Trim9	0	M0039	0.0667431
Kcne1l	Pak1	0	M0039	0.0623755
Kcne1l	4933402N03Rik	0	M0039	0.00753626
Kcne1l	Cacng5	0	M0039	0.0331742
Kcne1l	Rtn4rl1	0	M0039	0.0683648
Kcne1l	D430019H16Rik	0	M0039	0.0584519
Kcne1l	Arid3a	0	M0039	0.0295314
Kcne1l	Spry1	0	M0039	0.0463485
Kcne1l	Wt1	0	M0039	0.121528
Kcne1l	Mlana	0	M0039	0.0608165
Kcne1l	Etv4	0	M0039	0.0765168
Kcne1l	Cntn1	0	M0039	0.0543108
Kcne1l	Cxcr6	0	M0039	0.0474515
Kcne1l	Folh1	0	M0039	0.0298183
Kcne1l	1700015G11Rik	0	M0039	0.0471182
Kcne1l	Cyp2s1	0	M0039	0.0802978
Kcne1l	Bai2	0	M0039	0.121972
Kcne1l	Abcc6	0	M0039	0.0270851
Kcne1l	F3	0	M0039	0.0808569
Kcne1l	Tnr	0	M0039	0.0356579
Kcne1l	Clic3	0	M0039	0.0942732
Kcne1l	Olfr1265	0	M0039	0.0792937
Kcne1l	Olfr1052	0	M0039	0.0471982
Kcne1l	Insrr	0	M0039	0.133345
Kcne1l	Crybb3	0	M0039	0.0549533
Kcne1l	Adra2c	0	M0039	0.055589
Kcne1l	Ibsp	0	M0039	0.0937324
Kcne1l	Ptprf	0	M0039	0.0881102
Kcne1l	Ttc12	0	M0039	0.0159321
Kcne1l	Itih3	0	M0039	0.0573402
Kcne1l	Cps1	0	M0039	0.0254747
Kcne1l	Podn	0	M0039	0.034824
Kcne1l	Scn3b	0	M0039	0.0319676
Kcne1l	Ass1	0	M0039	0.103443
Kcne1l	Il3ra	0	M0039	0.0274152
Kcne1l	Serpina1d	0	M0039	0.0236853
Kcne1l	Serpinb6b	0	M0039	0.0192834
Kcne1l	Gjb3	0	M0039	0.0375296
Kcne1l	Il17re	0	M0039	0.0798483
Kcne1l	Enpp5	0	M0039	0.1125
Kcne1l	Gyk	0	M0039	0.0352557
Kcne1l	Mbd2	0	M0039	0.0323755
Kcne1l	Slc22a18	0	M0039	0.167019
Kcne1l	Gzmk	0	M0039	0.0158841
Kcne1l	Efemp1	0	M0039	0.0768005
Kcne1l	Fetub	0	M0039	0.104302
Kcne1l	Igfbp2	0	M0039	0.0707437
Kcne1l	Ank1	0	M0039	0.0433996
Kcne1l	Ngb	0	M0039	0.121719
Kcne1l	Yars	0	M0039	0.0703459
Kcne1l	Prkar1b	0	M0039	0.105081
Kcne1l	Slc6a4	0	M0039	0.064227
Kcne1l	A230065H16Rik	0	M0039	0.10048
Kcne1l	Cbs	0	M0039	0.0116264
Kcne1l	Prnd	0	M0039	0.0281942
Kcne1l	Capn9	0	M0039	0.061458
Kcne1l	4930438A08Rik	0	M0039	0.0285979
Kcne1l	Olfr667	0	M0039	0.00981314
Kcne1l	Rgs7	0	M0039	0.0387848
Kcne1l	Myo3a	0	M0039	0.0312577
Kcne1l	Sf3a2	0	M0039	0.0462725
Kcne1l	Bglap2	0	M0039	0.0213107
Kcne1l	Ache	0	M0039	0.0747989
Kcne1l	4632427E13Rik	0	M0039	0.0421933
Kcne1l	Fcer1a	0	M0039	0.0890956
Kcne1l	9330182L06Rik	0	M0039	0.0736967
Kcne1l	Atp1b4	0	M0039	0.0949448
Kcne1l	Nfasc	0	M0039	0.101992
Kcne1l	Calb1	0	M0039	0.0331916
Kcne1l	Mpp2	0	M0039	0.0409108
Kcne1l	Nrap	0	M0039	0.106256
Kcne1l	Glipr2	0	M0039	0.0418723
Kcne1l	Tcrb-J	0	M0039	0.0804943
Kcne1l	Tgfbr3	0	M0039	0.0635343
Kcne1l	Fez1	0	M0039	0.0880275
Kcne1l	Hao1	0	M0039	0.0728622
Kcne1l	Ccnd1	0	M0039	0.0674985
Kcne1l	Cdh3	0	M0039	0.0348562
Kcne1l	Kctd12	0	M0039	0.136759
Gdf10	Adcy1	0	M0039	0.266847
Gdf10	Anxa8	0	M0039	0.0863277
Gdf10	Fmod	0	M0039	0.324375
Gdf10	Cpa3	0	M0039	0.176855
Gdf10	Pi15	0	M0039	0.11843
Gdf10	Ptgs2	0	M0039	0.0697766
Gdf10	Retnla	0	M0039	0.22138
Gdf10	Rgs1	0	M0039	0.0940933
Gdf10	Crym	0	M0039	0.032499
Gdf10	Acr	0	M0039	0.101176
Gdf10	Olfr575	0	M0039	0.0197236
Gdf10	Plcb1	0	M0039	0.204575
Gdf10	Ier3	0	M0039	0.0778437
Gdf10	Arg1	0	M0039	0.0197061
Gdf10	Atp8a2	0	M0039	0.0212931
Gdf10	Nid2	0	M0039	0.0356366
Gdf10	Syt10	0	M0039	0.0438134
Gdf10	Ccl24	0	M0039	0.149583
Gdf10	1700025G04Rik	0	M0039	0.0992555
Gdf10	Scn1b	0	M0039	0.166847
Gdf10	Svs5	0	M0039	0.156551
Gdf10	Slc25a30	0	M0039	0.120025
Gdf10	Hic1	0	M0039	0.212814
Gdf10	Fads1	0	M0039	0.0789439
Gdf10	Tnfaip2	0	M0039	0.173375
Gdf10	Myoc	0	M0039	0.29954
Gdf10	Coq3	0	M0039	0.152145
Gdf10	Scx	0	M0039	0.188104
Gdf10	Acsl6	0	M0039	0.137791
Gdf10	Rasa4	0	M0039	0.25947
Gdf10	4931428L18Rik	0	M0039	0.0585287
Gdf10	Rarres1	0	M0039	0.257275
Gdf10	Pcdhb6	0	M0039	0.0877778
Gdf10	Ahsg	0	M0039	0.245653
Gdf10	Mmp20	0	M0039	0.0298451
Gdf10	Gpnmb	0	M0039	0.236288
Gdf10	Dpp7	0	M0039	0.162354
Gdf10	Glra1	0	M0039	0.0705066
Gdf10	Ear11	0	M0039	0.142636
Gdf10	Gdap1	0	M0039	0.245606
Gdf10	Homer3	0	M0039	0.161351
Gdf10	Agxt	0	M0039	0.123946
Gdf10	Rfx4	0	M0039	0.190336
Gdf10	Cacna2d3	0	M0039	0.288604
Gdf10	Cst9	0	M0039	0.113414
Gdf10	P2rx7	0	M0039	0.251218
Gdf10	Mx2	0	M0039	0.188869
Gdf10	Trpc4	0	M0039	0.0534762
Gdf10	Ankrd1	0	M0039	0.118463
Gdf10	Hspa8	0	M0039	0.128743
Gdf10	Dbnl	0	M0039	0.0441662
Gdf10	Plekhb2	0	M0039	0.132216
Gdf10	Slc6a15	0	M0039	0.061902
Gdf10	Uchl1	0	M0039	0.164961
Gdf10	Igfbp4	0	M0039	0.2105
Gdf10	Ece2	0	M0039	0.140071
Gdf10	Fbln5	0	M0039	0.164234
Gdf10	4932414N04Rik	0	M0039	0.0779694
Gdf10	Crlf1	0	M0039	0.189805
Gdf10	Foxn2	0	M0039	0.0196273
Gdf10	Cntn6	0	M0039	0.117304
Gdf10	Ctdsp2	0	M0039	0.105006
Gdf10	Slpi	0	M0039	0.0814242
Gdf10	Kif1a	0	M0039	0.245946
Gdf10	Cpxm2	0	M0039	0.310733
Gdf10	BC026585	0	M0039	0.138768
Gdf10	Bid	0	M0039	0.184159
Gdf10	Pdxp	0	M0039	0.0734727
Gdf10	Htr1a	0	M0039	0.163788
Gdf10	Icam1	0	M0039	0.138361
Gdf10	Skiv2l	0	M0039	0.210519
Gdf10	Il28ra	0	M0039	0.171668
Gdf10	Aamp	0	M0039	0.158966
Gdf10	Trim9	0	M0039	0.0664582
Gdf10	Pak1	0	M0039	0.206357
Gdf10	4933402N03Rik	0	M0039	0.0684862
Gdf10	Cacng5	0	M0039	0.127169
Gdf10	Rtn4rl1	0	M0039	0.201044
Gdf10	D430019H16Rik	0	M0039	0.103344
Gdf10	Arid3a	0	M0039	0.0496806
Gdf10	Spry1	0	M0039	0.207127
Gdf10	Wt1	0	M0039	0.0788479
Gdf10	Mlana	0	M0039	0.184442
Gdf10	Etv4	0	M0039	0.199399
Gdf10	Cntn1	0	M0039	0.1457
Gdf10	Cxcr6	0	M0039	0.218495
Gdf10	Folh1	0	M0039	0.106625
Gdf10	1700015G11Rik	0	M0039	0.110618
Gdf10	Cyp2s1	0	M0039	0.0401027
Gdf10	Bai2	0	M0039	0.0613091
Gdf10	Abcc6	0	M0039	0.0774802
Gdf10	F3	0	M0039	0.286087
Gdf10	Tnr	0	M0039	0.18516
Gdf10	Clic3	0	M0039	0.0571243
Gdf10	Olfr1265	0	M0039	0.030442
Gdf10	Olfr1052	0	M0039	0.101265
Gdf10	Insrr	0	M0039	0.130779
Gdf10	Crybb3	0	M0039	0.173345
Gdf10	Adra2c	0	M0039	0.161888
Gdf10	Ibsp	0	M0039	0.249792
Gdf10	Ptprf	0	M0039	0.15445
Gdf10	Ttc12	0	M0039	0.108784
Gdf10	Itih3	0	M0039	0.233794
Gdf10	Cps1	0	M0039	0.167495
Gdf10	Podn	0	M0039	0.0208733
Gdf10	Scn3b	0	M0039	0.131397
Gdf10	Ass1	0	M0039	0.221036
Gdf10	Il3ra	0	M0039	0.188101
Gdf10	Serpina1d	0	M0039	0.138716
Gdf10	Serpinb6b	0	M0039	0.0722458
Gdf10	Gjb3	0	M0039	0.0568009
Gdf10	Il17re	0	M0039	0.154219
Gdf10	Enpp5	0	M0039	0.192841
Gdf10	Gyk	0	M0039	0.0372026
Gdf10	Mbd2	0	M0039	0.0829645
Gdf10	Slc22a18	0	M0039	0.218072
Gdf10	Gzmk	0	M0039	0.0988602
Gdf10	Efemp1	0	M0039	0.281129
Gdf10	Fetub	0	M0039	0.189735
Gdf10	Igfbp2	0	M0039	0.151708
Gdf10	Ank1	0	M0039	0.052655
Gdf10	Ngb	0	M0039	0.191088
Gdf10	Yars	0	M0039	0.0990081
Gdf10	Prkar1b	0	M0039	0.322582
Gdf10	Slc6a4	0	M0039	0.143269
Gdf10	A230065H16Rik	0	M0039	0.318175
Gdf10	Cbs	0	M0039	0.0737905
Gdf10	Prnd	0	M0039	0.0544356
Gdf10	Capn9	0	M0039	0.111649
Gdf10	4930438A08Rik	0	M0039	0.0876503
Gdf10	Olfr667	0	M0039	0.0572143
Gdf10	Rgs7	0	M0039	0.184874
Gdf10	Myo3a	0	M0039	0.0903672
Gdf10	Sf3a2	0	M0039	0.0773304
Gdf10	Bglap2	0	M0039	0.103613
Gdf10	Ache	0	M0039	0.121999
Gdf10	4632427E13Rik	0	M0039	0.149735
Gdf10	Fcer1a	0	M0039	0.188975
Gdf10	9330182L06Rik	0	M0039	0.191149
Gdf10	Atp1b4	0	M0039	0.0661746
Gdf10	Nfasc	0	M0039	0.250859
Gdf10	Calb1	0	M0039	0.071253
Gdf10	Mpp2	0	M0039	0.0225838
Gdf10	Nrap	0	M0039	0.0675257
Gdf10	Glipr2	0	M0039	0.123785
Gdf10	Tcrb-J	0	M0039	0.157473
Gdf10	Tgfbr3	0	M0039	0.152514
Gdf10	Fez1	0	M0039	0.214023
Gdf10	Hao1	0	M0039	0.0761667
Gdf10	Ccnd1	0	M0039	0.246693
Gdf10	Cdh3	0	M0039	0.101753
Gdf10	Kctd12	0	M0039	0.270978
Adcy1	Anxa8	0	M0039	0.136684
Adcy1	Fmod	0	M0039	0.305237
Adcy1	Cpa3	0	M0039	0.192425
Adcy1	Pi15	0	M0039	0.0941853
Adcy1	Ptgs2	0	M0039	0.0675688
Adcy1	Retnla	0	M0039	0.183435
Adcy1	Rgs1	0	M0039	0.0638888
Adcy1	Crym	0	M0039	0.0744125
Adcy1	Acr	0	M0039	0.0942574
Adcy1	Olfr575	0	M0039	0.0309165
Adcy1	Plcb1	0	M0039	0.164076
Adcy1	Ier3	0	M0039	0.0833673
Adcy1	Arg1	0	M0039	0.0534605
Adcy1	Atp8a2	0	M0039	0.0541504
Adcy1	Nid2	0	M0039	0.0682176
Adcy1	Syt10	0	M0039	0.0812714
Adcy1	Ccl24	0	M0039	0.157068
Adcy1	1700025G04Rik	0	M0039	0.110648
Adcy1	Scn1b	0	M0039	0.14456
Adcy1	Svs5	0	M0039	0.147979
Adcy1	Slc25a30	0	M0039	0.127137
Adcy1	Hic1	0	M0039	0.223692
Adcy1	Fads1	0	M0039	0.13107
Adcy1	Tnfaip2	0	M0039	0.161071
Adcy1	Myoc	0	M0039	0.275646
Adcy1	Coq3	0	M0039	0.158548
Adcy1	Scx	0	M0039	0.220226
Adcy1	Acsl6	0	M0039	0.19542
Adcy1	Rasa4	0	M0039	0.248701
Adcy1	4931428L18Rik	0	M0039	0.0691748
Adcy1	Rarres1	0	M0039	0.263212
Adcy1	Pcdhb6	0	M0039	0.136976
Adcy1	Ahsg	0	M0039	0.259037
Adcy1	Mmp20	0	M0039	0.0492019
Adcy1	Gpnmb	0	M0039	0.225854
Adcy1	Dpp7	0	M0039	0.133664
Adcy1	Glra1	0	M0039	0.0994672
Adcy1	Ear11	0	M0039	0.0862689
Adcy1	Gdap1	0	M0039	0.226915
Adcy1	Homer3	0	M0039	0.178237
Adcy1	Agxt	0	M0039	0.0986152
Adcy1	Rfx4	0	M0039	0.184303
Adcy1	Cacna2d3	0	M0039	0.283064
Adcy1	Cst9	0	M0039	0.118805
Adcy1	P2rx7	0	M0039	0.200834
Adcy1	Mx2	0	M0039	0.188564
Adcy1	Trpc4	0	M0039	0.092691
Adcy1	Ankrd1	0	M0039	0.105956
Adcy1	Hspa8	0	M0039	0.147853
Adcy1	Dbnl	0	M0039	0.0839107
Adcy1	Plekhb2	0	M0039	0.178342
Adcy1	Slc6a15	0	M0039	0.0697938
Adcy1	Uchl1	0	M0039	0.209169
Adcy1	Igfbp4	0	M0039	0.260191
Adcy1	Ece2	0	M0039	0.079839
Adcy1	Fbln5	0	M0039	0.19129
Adcy1	4932414N04Rik	0	M0039	0.045295
Adcy1	Crlf1	0	M0039	0.155555
Adcy1	Foxn2	0	M0039	0.0473085
Adcy1	Cntn6	0	M0039	0.140269
Adcy1	Ctdsp2	0	M0039	0.119789
Adcy1	Slpi	0	M0039	0.101976
Adcy1	Kif1a	0	M0039	0.280105
Adcy1	Cpxm2	0	M0039	0.294064
Adcy1	BC026585	0	M0039	0.135398
Adcy1	Bid	0	M0039	0.12984
Adcy1	Pdxp	0	M0039	0.0499552
Adcy1	Htr1a	0	M0039	0.165328
Adcy1	Icam1	0	M0039	0.135976
Adcy1	Skiv2l	0	M0039	0.238377
Adcy1	Il28ra	0	M0039	0.142729
Adcy1	Aamp	0	M0039	0.20149
Adcy1	Trim9	0	M0039	0.0905874
Adcy1	Pak1	0	M0039	0.206223
Adcy1	4933402N03Rik	0	M0039	0.0642609
Adcy1	Cacng5	0	M0039	0.0846985
Adcy1	Rtn4rl1	0	M0039	0.188042
Adcy1	D430019H16Rik	0	M0039	0.114471
Adcy1	Arid3a	0	M0039	0.0838469
Adcy1	Spry1	0	M0039	0.175783
Adcy1	Wt1	0	M0039	0.116622
Adcy1	Mlana	0	M0039	0.206608
Adcy1	Etv4	0	M0039	0.238047
Adcy1	Cntn1	0	M0039	0.157349
Adcy1	Cxcr6	0	M0039	0.136767
Adcy1	Folh1	0	M0039	0.129392
Adcy1	1700015G11Rik	0	M0039	0.0893448
Adcy1	Cyp2s1	0	M0039	0.0855124
Adcy1	Bai2	0	M0039	0.0967806
Adcy1	Abcc6	0	M0039	0.0694796
Adcy1	F3	0	M0039	0.249353
Adcy1	Tnr	0	M0039	0.162225
Adcy1	Clic3	0	M0039	0.0881746
Adcy1	Olfr1265	0	M0039	0.0473688
Adcy1	Olfr1052	0	M0039	0.135545
Adcy1	Insrr	0	M0039	0.161487
Adcy1	Crybb3	0	M0039	0.196137
Adcy1	Adra2c	0	M0039	0.127903
Adcy1	Ibsp	0	M0039	0.273825
Adcy1	Ptprf	0	M0039	0.170285
Adcy1	Ttc12	0	M0039	0.120335
Adcy1	Itih3	0	M0039	0.25145
Adcy1	Cps1	0	M0039	0.167492
Adcy1	Podn	0	M0039	0.0350067
Adcy1	Scn3b	0	M0039	0.139699
Adcy1	Ass1	0	M0039	0.242923
Adcy1	Il3ra	0	M0039	0.123986
Adcy1	Serpina1d	0	M0039	0.112222
Adcy1	Serpinb6b	0	M0039	0.0649437
Adcy1	Gjb3	0	M0039	0.0876599
Adcy1	Il17re	0	M0039	0.152049
Adcy1	Enpp5	0	M0039	0.173884
Adcy1	Gyk	0	M0039	0.0460731
Adcy1	Mbd2	0	M0039	0.117043
Adcy1	Slc22a18	0	M0039	0.24044
Adcy1	Gzmk	0	M0039	0.0578525
Adcy1	Efemp1	0	M0039	0.224512
Adcy1	Fetub	0	M0039	0.153585
Adcy1	Igfbp2	0	M0039	0.160305
Adcy1	Ank1	0	M0039	0.0627178
Adcy1	Ngb	0	M0039	0.220355
Adcy1	Yars	0	M0039	0.0883474
Adcy1	Prkar1b	0	M0039	0.290507
Adcy1	Slc6a4	0	M0039	0.171789
Adcy1	A230065H16Rik	0	M0039	0.290547
Adcy1	Cbs	0	M0039	0.037412
Adcy1	Prnd	0	M0039	0.0994686
Adcy1	Capn9	0	M0039	0.0988758
Adcy1	4930438A08Rik	0	M0039	0.106658
Adcy1	Olfr667	0	M0039	0.0444758
Adcy1	Rgs7	0	M0039	0.167384
Adcy1	Myo3a	0	M0039	0.103937
Adcy1	Sf3a2	0	M0039	0.0847805
Adcy1	Bglap2	0	M0039	0.103626
Adcy1	Ache	0	M0039	0.122938
Adcy1	4632427E13Rik	0	M0039	0.170188
Adcy1	Fcer1a	0	M0039	0.199324
Adcy1	9330182L06Rik	0	M0039	0.165639
Adcy1	Atp1b4	0	M0039	0.103049
Adcy1	Nfasc	0	M0039	0.265422
Adcy1	Calb1	0	M0039	0.0707716
Adcy1	Mpp2	0	M0039	0.0447697
Adcy1	Nrap	0	M0039	0.106001
Adcy1	Glipr2	0	M0039	0.112993
Adcy1	Tcrb-J	0	M0039	0.193832
Adcy1	Tgfbr3	0	M0039	0.105539
Adcy1	Fez1	0	M0039	0.209753
Adcy1	Hao1	0	M0039	0.114999
Adcy1	Ccnd1	0	M0039	0.185352
Adcy1	Cdh3	0	M0039	0.100652
Adcy1	Kctd12	0	M0039	0.270935
Anxa8	Fmod	0	M0039	0.124162
Anxa8	Cpa3	0	M0039	0.103968
Anxa8	Pi15	0	M0039	0.0747495
Anxa8	Ptgs2	0	M0039	0.039312
Anxa8	Retnla	0	M0039	0.0611897
Anxa8	Rgs1	0	M0039	0.0329182
Anxa8	Crym	0	M0039	0.110186
Anxa8	Acr	0	M0039	0.08191
Anxa8	Olfr575	0	M0039	0.0806111
Anxa8	Plcb1	0	M0039	0.0647788
Anxa8	Ier3	0	M0039	0.0639939
Anxa8	Arg1	0	M0039	0.0677954
Anxa8	Atp8a2	0	M0039	0.0723939
Anxa8	Nid2	0	M0039	0.0818481
Anxa8	Syt10	0	M0039	0.16929
Anxa8	Ccl24	0	M0039	0.0740376
Anxa8	1700025G04Rik	0	M0039	0.0700184
Anxa8	Scn1b	0	M0039	0.0633174
Anxa8	Svs5	0	M0039	0.0526372
Anxa8	Slc25a30	0	M0039	0.0818458
Anxa8	Hic1	0	M0039	0.162402
Anxa8	Fads1	0	M0039	0.129835
Anxa8	Tnfaip2	0	M0039	0.0606726
Anxa8	Myoc	0	M0039	0.115371
Anxa8	Coq3	0	M0039	0.0812729
Anxa8	Scx	0	M0039	0.0818499
Anxa8	Acsl6	0	M0039	0.147531
Anxa8	Rasa4	0	M0039	0.109689
Anxa8	4931428L18Rik	0	M0039	0.0445073
Anxa8	Rarres1	0	M0039	0.11998
Anxa8	Pcdhb6	0	M0039	0.13906
Anxa8	Ahsg	0	M0039	0.110774
Anxa8	Mmp20	0	M0039	0.107188
Anxa8	Gpnmb	0	M0039	0.110169
Anxa8	Dpp7	0	M0039	0.0390165
Anxa8	Glra1	0	M0039	0.0759178
Anxa8	Ear11	0	M0039	0.0275681
Anxa8	Gdap1	0	M0039	0.0912119
Anxa8	Homer3	0	M0039	0.107777
Anxa8	Agxt	0	M0039	0.0675637
Anxa8	Rfx4	0	M0039	0.0872852
Anxa8	Cacna2d3	0	M0039	0.105617
Anxa8	Cst9	0	M0039	0.0930418
Anxa8	P2rx7	0	M0039	0.0672438
Anxa8	Mx2	0	M0039	0.104192
Anxa8	Trpc4	0	M0039	0.0812427
Anxa8	Ankrd1	0	M0039	0.0463857
Anxa8	Hspa8	0	M0039	0.0788669
Anxa8	Dbnl	0	M0039	0.127824
Anxa8	Plekhb2	0	M0039	0.0985028
Anxa8	Slc6a15	0	M0039	0.0491528
Anxa8	Uchl1	0	M0039	0.0823314
Anxa8	Igfbp4	0	M0039	0.173308
Anxa8	Ece2	0	M0039	0.0290922
Anxa8	Fbln5	0	M0039	0.126832
Anxa8	4932414N04Rik	0	M0039	0.0367273
Anxa8	Crlf1	0	M0039	0.0468358
Anxa8	Foxn2	0	M0039	0.0811974
Anxa8	Cntn6	0	M0039	0.0798195
Anxa8	Ctdsp2	0	M0039	0.135879
Anxa8	Slpi	0	M0039	0.0665571
Anxa8	Kif1a	0	M0039	0.135545
Anxa8	Cpxm2	0	M0039	0.0997093
Anxa8	BC026585	0	M0039	0.130492
Anxa8	Bid	0	M0039	0.057305
Anxa8	Pdxp	0	M0039	0.0499359
Anxa8	Htr1a	0	M0039	0.0661998
Anxa8	Icam1	0	M0039	0.067886
Anxa8	Skiv2l	0	M0039	0.202775
Anxa8	Il28ra	0	M0039	0.08978
Anxa8	Aamp	0	M0039	0.138578
Anxa8	Trim9	0	M0039	0.0801846
Anxa8	Pak1	0	M0039	0.11385
Anxa8	4933402N03Rik	0	M0039	0.0508196
Anxa8	Cacng5	0	M0039	0.0402812
Anxa8	Rtn4rl1	0	M0039	0.075307
Anxa8	D430019H16Rik	0	M0039	0.0583086
Anxa8	Arid3a	0	M0039	0.114287
Anxa8	Spry1	0	M0039	0.0540582
Anxa8	Wt1	0	M0039	0.142523
Anxa8	Mlana	0	M0039	0.121223
Anxa8	Etv4	0	M0039	0.1263
Anxa8	Cntn1	0	M0039	0.0575171
Anxa8	Cxcr6	0	M0039	0.0417041
Anxa8	Folh1	0	M0039	0.065055
Anxa8	1700015G11Rik	0	M0039	0.0420857
Anxa8	Cyp2s1	0	M0039	0.163364
Anxa8	Bai2	0	M0039	0.111821
Anxa8	Abcc6	0	M0039	0.0493467
Anxa8	F3	0	M0039	0.105139
Anxa8	Tnr	0	M0039	0.0383649
Anxa8	Clic3	0	M0039	0.105921
Anxa8	Olfr1265	0	M0039	0.0772954
Anxa8	Olfr1052	0	M0039	0.119898
Anxa8	Insrr	0	M0039	0.0996628
Anxa8	Crybb3	0	M0039	0.101943
Anxa8	Adra2c	0	M0039	0.0815723
Anxa8	Ibsp	0	M0039	0.111107
Anxa8	Ptprf	0	M0039	0.0881234
Anxa8	Ttc12	0	M0039	0.0476377
Anxa8	Itih3	0	M0039	0.0785891
Anxa8	Cps1	0	M0039	0.0804478
Anxa8	Podn	0	M0039	0.0918094
Anxa8	Scn3b	0	M0039	0.0752678
Anxa8	Ass1	0	M0039	0.118313
Anxa8	Il3ra	0	M0039	0.0351024
Anxa8	Serpina1d	0	M0039	0.0463109
Anxa8	Serpinb6b	0	M0039	0.0415009
Anxa8	Gjb3	0	M0039	0.122117
Anxa8	Il17re	0	M0039	0.103789
Anxa8	Enpp5	0	M0039	0.109678
Anxa8	Gyk	0	M0039	0.0690417
Anxa8	Mbd2	0	M0039	0.0662225
Anxa8	Slc22a18	0	M0039	0.140204
Anxa8	Gzmk	0	M0039	0.019689
Anxa8	Efemp1	0	M0039	0.0841974
Anxa8	Fetub	0	M0039	0.0741117
Anxa8	Igfbp2	0	M0039	0.0660982
Anxa8	Ank1	0	M0039	0.048484
Anxa8	Ngb	0	M0039	0.130096
Anxa8	Yars	0	M0039	0.0554805
Anxa8	Prkar1b	0	M0039	0.122135
Anxa8	Slc6a4	0	M0039	0.119306
Anxa8	A230065H16Rik	0	M0039	0.116527
Anxa8	Cbs	0	M0039	0.0329878
Anxa8	Prnd	0	M0039	0.0734933
Anxa8	Capn9	0	M0039	0.0541323
Anxa8	4930438A08Rik	0	M0039	0.046217
Anxa8	Olfr667	0	M0039	0.0216216
Anxa8	Rgs7	0	M0039	0.0569107
Anxa8	Myo3a	0	M0039	0.0816161
Anxa8	Sf3a2	0	M0039	0.0771751
Anxa8	Bglap2	0	M0039	0.0413201
Anxa8	Ache	0	M0039	0.0959413
Anxa8	4632427E13Rik	0	M0039	0.0609549
Anxa8	Fcer1a	0	M0039	0.133909
Anxa8	9330182L06Rik	0	M0039	0.0739705
Anxa8	Atp1b4	0	M0039	0.123807
Anxa8	Nfasc	0	M0039	0.120765
Anxa8	Calb1	0	M0039	0.102881
Anxa8	Mpp2	0	M0039	0.124157
Anxa8	Nrap	0	M0039	0.0855769
Anxa8	Glipr2	0	M0039	0.06067
Anxa8	Tcrb-J	0	M0039	0.137268
Anxa8	Tgfbr3	0	M0039	0.071049
Anxa8	Fez1	0	M0039	0.118484
Anxa8	Hao1	0	M0039	0.107382
Anxa8	Ccnd1	0	M0039	0.0670461
Anxa8	Cdh3	0	M0039	0.0796806
Anxa8	Kctd12	0	M0039	0.147699
Fmod	Cpa3	0	M0039	0.172447
Fmod	Pi15	0	M0039	0.111863
Fmod	Ptgs2	0	M0039	0.0999174
Fmod	Retnla	0	M0039	0.207185
Fmod	Rgs1	0	M0039	0.120826
Fmod	Crym	0	M0039	0.0540896
Fmod	Acr	0	M0039	0.114664
Fmod	Olfr575	0	M0039	0.0248106
Fmod	Plcb1	0	M0039	0.205243
Fmod	Ier3	0	M0039	0.114332
Fmod	Arg1	0	M0039	0.0322047
Fmod	Atp8a2	0	M0039	0.043909
Fmod	Nid2	0	M0039	0.0535574
Fmod	Syt10	0	M0039	0.0581391
Fmod	Ccl24	0	M0039	0.137877
Fmod	1700025G04Rik	0	M0039	0.11541
Fmod	Scn1b	0	M0039	0.185231
Fmod	Svs5	0	M0039	0.186188
Fmod	Slc25a30	0	M0039	0.131177
Fmod	Hic1	0	M0039	0.222919
Fmod	Fads1	0	M0039	0.12937
Fmod	Tnfaip2	0	M0039	0.183303
Fmod	Myoc	0	M0039	0.314714
Fmod	Coq3	0	M0039	0.164089
Fmod	Scx	0	M0039	0.23674
Fmod	Acsl6	0	M0039	0.197138
Fmod	Rasa4	0	M0039	0.261576
Fmod	4931428L18Rik	0	M0039	0.0763686
Fmod	Rarres1	0	M0039	0.293481
Fmod	Pcdhb6	0	M0039	0.136083
Fmod	Ahsg	0	M0039	0.248266
Fmod	Mmp20	0	M0039	0.0473061
Fmod	Gpnmb	0	M0039	0.248911
Fmod	Dpp7	0	M0039	0.166594
Fmod	Glra1	0	M0039	0.0970971
Fmod	Ear11	0	M0039	0.109734
Fmod	Gdap1	0	M0039	0.230577
Fmod	Homer3	0	M0039	0.190837
Fmod	Agxt	0	M0039	0.111669
Fmod	Rfx4	0	M0039	0.183086
Fmod	Cacna2d3	0	M0039	0.33277
Fmod	Cst9	0	M0039	0.131664
Fmod	P2rx7	0	M0039	0.261227
Fmod	Mx2	0	M0039	0.224779
Fmod	Trpc4	0	M0039	0.0860485
Fmod	Ankrd1	0	M0039	0.108961
Fmod	Hspa8	0	M0039	0.174867
Fmod	Dbnl	0	M0039	0.074921
Fmod	Plekhb2	0	M0039	0.162997
Fmod	Slc6a15	0	M0039	0.0888737
Fmod	Uchl1	0	M0039	0.215227
Fmod	Igfbp4	0	M0039	0.216183
Fmod	Ece2	0	M0039	0.159938
Fmod	Fbln5	0	M0039	0.20191
Fmod	4932414N04Rik	0	M0039	0.0759039
Fmod	Crlf1	0	M0039	0.189704
Fmod	Foxn2	0	M0039	0.0422019
Fmod	Cntn6	0	M0039	0.168834
Fmod	Ctdsp2	0	M0039	0.109506
Fmod	Slpi	0	M0039	0.0804639
Fmod	Kif1a	0	M0039	0.278902
Fmod	Cpxm2	0	M0039	0.32766
Fmod	BC026585	0	M0039	0.155654
Fmod	Bid	0	M0039	0.192329
Fmod	Pdxp	0	M0039	0.0758005
Fmod	Htr1a	0	M0039	0.187133
Fmod	Icam1	0	M0039	0.152394
Fmod	Skiv2l	0	M0039	0.231211
Fmod	Il28ra	0	M0039	0.208673
Fmod	Aamp	0	M0039	0.17435
Fmod	Trim9	0	M0039	0.0710293
Fmod	Pak1	0	M0039	0.274843
Fmod	4933402N03Rik	0	M0039	0.0954415
Fmod	Cacng5	0	M0039	0.115077
Fmod	Rtn4rl1	0	M0039	0.223613
Fmod	D430019H16Rik	0	M0039	0.114637
Fmod	Arid3a	0	M0039	0.0790075
Fmod	Spry1	0	M0039	0.202273
Fmod	Wt1	0	M0039	0.0988
Fmod	Mlana	0	M0039	0.239678
Fmod	Etv4	0	M0039	0.252624
Fmod	Cntn1	0	M0039	0.15939
Fmod	Cxcr6	0	M0039	0.198592
Fmod	Folh1	0	M0039	0.150476
Fmod	1700015G11Rik	0	M0039	0.0924876
Fmod	Cyp2s1	0	M0039	0.0631515
Fmod	Bai2	0	M0039	0.0641577
Fmod	Abcc6	0	M0039	0.132647
Fmod	F3	0	M0039	0.317892
Fmod	Tnr	0	M0039	0.197316
Fmod	Clic3	0	M0039	0.0841634
Fmod	Olfr1265	0	M0039	0.0543058
Fmod	Olfr1052	0	M0039	0.156828
Fmod	Insrr	0	M0039	0.145458
Fmod	Crybb3	0	M0039	0.20037
Fmod	Adra2c	0	M0039	0.202821
Fmod	Ibsp	0	M0039	0.285053
Fmod	Ptprf	0	M0039	0.149908
Fmod	Ttc12	0	M0039	0.139972
Fmod	Itih3	0	M0039	0.277968
Fmod	Cps1	0	M0039	0.184786
Fmod	Podn	0	M0039	0.019187
Fmod	Scn3b	0	M0039	0.15771
Fmod	Ass1	0	M0039	0.269184
Fmod	Il3ra	0	M0039	0.204935
Fmod	Serpina1d	0	M0039	0.133472
Fmod	Serpinb6b	0	M0039	0.112009
Fmod	Gjb3	0	M0039	0.102787
Fmod	Il17re	0	M0039	0.179607
Fmod	Enpp5	0	M0039	0.203694
Fmod	Gyk	0	M0039	0.0712778
Fmod	Mbd2	0	M0039	0.122627
Fmod	Slc22a18	0	M0039	0.22349
Fmod	Gzmk	0	M0039	0.0764555
Fmod	Efemp1	0	M0039	0.269512
Fmod	Fetub	0	M0039	0.164734
Fmod	Igfbp2	0	M0039	0.174521
Fmod	Ank1	0	M0039	0.0597216
Fmod	Ngb	0	M0039	0.246594
Fmod	Yars	0	M0039	0.0913531
Fmod	Prkar1b	0	M0039	0.295474
Fmod	Slc6a4	0	M0039	0.173328
Fmod	A230065H16Rik	0	M0039	0.325148
Fmod	Cbs	0	M0039	0.0551689
Fmod	Prnd	0	M0039	0.0764413
Fmod	Capn9	0	M0039	0.0932535
Fmod	4930438A08Rik	0	M0039	0.122711
Fmod	Olfr667	0	M0039	0.0724983
Fmod	Rgs7	0	M0039	0.22014
Fmod	Myo3a	0	M0039	0.128935
Fmod	Sf3a2	0	M0039	0.100821
Fmod	Bglap2	0	M0039	0.0816129
Fmod	Ache	0	M0039	0.15404
Fmod	4632427E13Rik	0	M0039	0.173891
Fmod	Fcer1a	0	M0039	0.186954
Fmod	9330182L06Rik	0	M0039	0.224168
Fmod	Atp1b4	0	M0039	0.0776212
Fmod	Nfasc	0	M0039	0.269813
Fmod	Calb1	0	M0039	0.111063
Fmod	Mpp2	0	M0039	0.0291287
Fmod	Nrap	0	M0039	0.0925975
Fmod	Glipr2	0	M0039	0.138401
Fmod	Tcrb-J	0	M0039	0.167044
Fmod	Tgfbr3	0	M0039	0.143086
Fmod	Fez1	0	M0039	0.260202
Fmod	Hao1	0	M0039	0.105986
Fmod	Ccnd1	0	M0039	0.239861
Fmod	Cdh3	0	M0039	0.0979047
Fmod	Kctd12	0	M0039	0.292264
Cpa3	Pi15	0	M0039	0.0793505
Cpa3	Ptgs2	0	M0039	0.027233
Cpa3	Retnla	0	M0039	0.169631
Cpa3	Rgs1	0	M0039	0.0468395
Cpa3	Crym	0	M0039	0.0344385
Cpa3	Acr	0	M0039	0.0830001
Cpa3	Olfr575	0	M0039	0.0484346
Cpa3	Plcb1	0	M0039	0.101677
Cpa3	Ier3	0	M0039	0.0326662
Cpa3	Arg1	0	M0039	0.0197958
Cpa3	Atp8a2	0	M0039	0.0125048
Cpa3	Nid2	0	M0039	0.043882
Cpa3	Syt10	0	M0039	0.0888167
Cpa3	Ccl24	0	M0039	0.154563
Cpa3	1700025G04Rik	0	M0039	0.0460024
Cpa3	Scn1b	0	M0039	0.0706179
Cpa3	Svs5	0	M0039	0.0886414
Cpa3	Slc25a30	0	M0039	0.159817
Cpa3	Hic1	0	M0039	0.204349
Cpa3	Fads1	0	M0039	0.0420702
Cpa3	Tnfaip2	0	M0039	0.0952942
Cpa3	Myoc	0	M0039	0.164446
Cpa3	Coq3	0	M0039	0.125616
Cpa3	Scx	0	M0039	0.0750981
Cpa3	Acsl6	0	M0039	0.0835222
Cpa3	Rasa4	0	M0039	0.151183
Cpa3	4931428L18Rik	0	M0039	0.0249427
Cpa3	Rarres1	0	M0039	0.194287
Cpa3	Pcdhb6	0	M0039	0.0638077
Cpa3	Ahsg	0	M0039	0.20119
Cpa3	Mmp20	0	M0039	0.0508841
Cpa3	Gpnmb	0	M0039	0.13975
Cpa3	Dpp7	0	M0039	0.0705581
Cpa3	Glra1	0	M0039	0.0370916
Cpa3	Ear11	0	M0039	0.105476
Cpa3	Gdap1	0	M0039	0.155969
Cpa3	Homer3	0	M0039	0.163849
Cpa3	Agxt	0	M0039	0.0898797
Cpa3	Rfx4	0	M0039	0.115047
Cpa3	Cacna2d3	0	M0039	0.152963
Cpa3	Cst9	0	M0039	0.0768819
Cpa3	P2rx7	0	M0039	0.153487
Cpa3	Mx2	0	M0039	0.124175
Cpa3	Trpc4	0	M0039	0.0281395
Cpa3	Ankrd1	0	M0039	0.0787239
Cpa3	Hspa8	0	M0039	0.0391201
Cpa3	Dbnl	0	M0039	0.0516656
Cpa3	Plekhb2	0	M0039	0.0812368
Cpa3	Slc6a15	0	M0039	0.0285583
Cpa3	Uchl1	0	M0039	0.0616571
Cpa3	Igfbp4	0	M0039	0.198779
Cpa3	Ece2	0	M0039	0.0420813
Cpa3	Fbln5	0	M0039	0.126219
Cpa3	4932414N04Rik	0	M0039	0.0274379
Cpa3	Crlf1	0	M0039	0.0912714
Cpa3	Foxn2	0	M0039	0.00812312
Cpa3	Cntn6	0	M0039	0.040771
Cpa3	Ctdsp2	0	M0039	0.141159
Cpa3	Slpi	0	M0039	0.0913706
Cpa3	Kif1a	0	M0039	0.140836
Cpa3	Cpxm2	0	M0039	0.194275
Cpa3	BC026585	0	M0039	0.158304
Cpa3	Bid	0	M0039	0.103905
Cpa3	Pdxp	0	M0039	0.0373091
Cpa3	Htr1a	0	M0039	0.0523933
Cpa3	Icam1	0	M0039	0.141991
Cpa3	Skiv2l	0	M0039	0.222925
Cpa3	Il28ra	0	M0039	0.101101
Cpa3	Aamp	0	M0039	0.168834
Cpa3	Trim9	0	M0039	0.0818661
Cpa3	Pak1	0	M0039	0.102235
Cpa3	4933402N03Rik	0	M0039	0.0375736
Cpa3	Cacng5	0	M0039	0.0625396
Cpa3	Rtn4rl1	0	M0039	0.101139
Cpa3	D430019H16Rik	0	M0039	0.0392572
Cpa3	Arid3a	0	M0039	0.0467304
Cpa3	Spry1	0	M0039	0.126121
Cpa3	Wt1	0	M0039	0.0979823
Cpa3	Mlana	0	M0039	0.078941
Cpa3	Etv4	0	M0039	0.115
Cpa3	Cntn1	0	M0039	0.0483946
Cpa3	Cxcr6	0	M0039	0.0857921
Cpa3	Folh1	0	M0039	0.0278183
Cpa3	1700015G11Rik	0	M0039	0.0596229
Cpa3	Cyp2s1	0	M0039	0.0658424
Cpa3	Bai2	0	M0039	0.0985265
Cpa3	Abcc6	0	M0039	0.0272931
Cpa3	F3	0	M0039	0.136711
Cpa3	Tnr	0	M0039	0.0509683
Cpa3	Clic3	0	M0039	0.0796181
Cpa3	Olfr1265	0	M0039	0.0263311
Cpa3	Olfr1052	0	M0039	0.0683138
Cpa3	Insrr	0	M0039	0.10932
Cpa3	Crybb3	0	M0039	0.150094
Cpa3	Adra2c	0	M0039	0.117059
Cpa3	Ibsp	0	M0039	0.154538
Cpa3	Ptprf	0	M0039	0.143377
Cpa3	Ttc12	0	M0039	0.0456289
Cpa3	Itih3	0	M0039	0.102687
Cpa3	Cps1	0	M0039	0.119609
Cpa3	Podn	0	M0039	0.0792209
Cpa3	Scn3b	0	M0039	0.0858578
Cpa3	Ass1	0	M0039	0.124119
Cpa3	Il3ra	0	M0039	0.0503336
Cpa3	Serpina1d	0	M0039	0.108209
Cpa3	Serpinb6b	0	M0039	0.0285684
Cpa3	Gjb3	0	M0039	0.0366483
Cpa3	Il17re	0	M0039	0.0802077
Cpa3	Enpp5	0	M0039	0.143263
Cpa3	Gyk	0	M0039	0.020303
Cpa3	Mbd2	0	M0039	0.0312869
Cpa3	Slc22a18	0	M0039	0.13944
Cpa3	Gzmk	0	M0039	0.0298197
Cpa3	Efemp1	0	M0039	0.125777
Cpa3	Fetub	0	M0039	0.114025
Cpa3	Igfbp2	0	M0039	0.0718641
Cpa3	Ank1	0	M0039	0.0461158
Cpa3	Ngb	0	M0039	0.0927901
Cpa3	Yars	0	M0039	0.102664
Cpa3	Prkar1b	0	M0039	0.204321
Cpa3	Slc6a4	0	M0039	0.144169
Cpa3	A230065H16Rik	0	M0039	0.1846
Cpa3	Cbs	0	M0039	0.0396621
Cpa3	Prnd	0	M0039	0.0364554
Cpa3	Capn9	0	M0039	0.129361
Cpa3	4930438A08Rik	0	M0039	0.0222927
Cpa3	Olfr667	0	M0039	0.0262154
Cpa3	Rgs7	0	M0039	0.060973
Cpa3	Myo3a	0	M0039	0.0859323
Cpa3	Sf3a2	0	M0039	0.0550307
Cpa3	Bglap2	0	M0039	0.0795159
Cpa3	Ache	0	M0039	0.0486125
Cpa3	4632427E13Rik	0	M0039	0.0622378
Cpa3	Fcer1a	0	M0039	0.25836
Cpa3	9330182L06Rik	0	M0039	0.0843551
Cpa3	Atp1b4	0	M0039	0.100196
Cpa3	Nfasc	0	M0039	0.122376
Cpa3	Calb1	0	M0039	0.0387111
Cpa3	Mpp2	0	M0039	0.0482914
Cpa3	Nrap	0	M0039	0.0453515
Cpa3	Glipr2	0	M0039	0.0958935
Cpa3	Tcrb-J	0	M0039	0.192729
Cpa3	Tgfbr3	0	M0039	0.105088
Cpa3	Fez1	0	M0039	0.126324
Cpa3	Hao1	0	M0039	0.0374069
Cpa3	Ccnd1	0	M0039	0.151318
Cpa3	Cdh3	0	M0039	0.0693969
Cpa3	Kctd12	0	M0039	0.148285
Pi15	Ptgs2	0	M0039	0.0247475
Pi15	Retnla	0	M0039	0.0574244
Pi15	Rgs1	0	M0039	0.0182326
Pi15	Crym	0	M0039	0.0169489
Pi15	Acr	0	M0039	0.0753554
Pi15	Olfr575	0	M0039	0.0324488
Pi15	Plcb1	0	M0039	0.100433
Pi15	Ier3	0	M0039	0.0435239
Pi15	Arg1	0	M0039	0.0103699
Pi15	Atp8a2	0	M0039	0.012005
Pi15	Nid2	0	M0039	0.00857287
Pi15	Syt10	0	M0039	0.0651412
Pi15	Ccl24	0	M0039	0.0539218
Pi15	1700025G04Rik	0	M0039	0.0980791
Pi15	Scn1b	0	M0039	0.089566
Pi15	Svs5	0	M0039	0.0242079
Pi15	Slc25a30	0	M0039	0.0473238
Pi15	Hic1	0	M0039	0.1467
Pi15	Fads1	0	M0039	0.0488511
Pi15	Tnfaip2	0	M0039	0.0658325
Pi15	Myoc	0	M0039	0.0989085
Pi15	Coq3	0	M0039	0.0694133
Pi15	Scx	0	M0039	0.0415317
Pi15	Acsl6	0	M0039	0.0606745
Pi15	Rasa4	0	M0039	0.109451
Pi15	4931428L18Rik	0	M0039	0.0391605
Pi15	Rarres1	0	M0039	0.0747488
Pi15	Pcdhb6	0	M0039	0.04543
Pi15	Ahsg	0	M0039	0.0993766
Pi15	Mmp20	0	M0039	0.0249314
Pi15	Gpnmb	0	M0039	0.118002
Pi15	Dpp7	0	M0039	0.0401614
Pi15	Glra1	0	M0039	0.0438126
Pi15	Ear11	0	M0039	0.0440526
Pi15	Gdap1	0	M0039	0.123104
Pi15	Homer3	0	M0039	0.0463274
Pi15	Agxt	0	M0039	0.168957
Pi15	Rfx4	0	M0039	0.150097
Pi15	Cacna2d3	0	M0039	0.0844708
Pi15	Cst9	0	M0039	0.0981576
Pi15	P2rx7	0	M0039	0.0621022
Pi15	Mx2	0	M0039	0.0918493
Pi15	Trpc4	0	M0039	0.0214214
Pi15	Ankrd1	0	M0039	0.0398118
Pi15	Hspa8	0	M0039	0.0632447
Pi15	Dbnl	0	M0039	0.0311322
Pi15	Plekhb2	0	M0039	0.0508185
Pi15	Slc6a15	0	M0039	0.0188574
Pi15	Uchl1	0	M0039	0.0356432
Pi15	Igfbp4	0	M0039	0.126505
Pi15	Ece2	0	M0039	0.0395917
Pi15	Fbln5	0	M0039	0.0799147
Pi15	4932414N04Rik	0	M0039	0.122109
Pi15	Crlf1	0	M0039	0.0431361
Pi15	Foxn2	0	M0039	0.0228918
Pi15	Cntn6	0	M0039	0.0455617
Pi15	Ctdsp2	0	M0039	0.16126
Pi15	Slpi	0	M0039	0.0255746
Pi15	Kif1a	0	M0039	0.0930983
Pi15	Cpxm2	0	M0039	0.0983255
Pi15	BC026585	0	M0039	0.160261
Pi15	Bid	0	M0039	0.0742542
Pi15	Pdxp	0	M0039	0.135772
Pi15	Htr1a	0	M0039	0.0802458
Pi15	Icam1	0	M0039	0.033613
Pi15	Skiv2l	0	M0039	0.139512
Pi15	Il28ra	0	M0039	0.075487
Pi15	Aamp	0	M0039	0.113793
Pi15	Trim9	0	M0039	0.0302881
Pi15	Pak1	0	M0039	0.0800518
Pi15	4933402N03Rik	0	M0039	0.0336817
Pi15	Cacng5	0	M0039	0.0700334
Pi15	Rtn4rl1	0	M0039	0.0862112
Pi15	D430019H16Rik	0	M0039	0.06333
Pi15	Arid3a	0	M0039	0.0328368
Pi15	Spry1	0	M0039	0.0425928
Pi15	Wt1	0	M0039	0.056255
Pi15	Mlana	0	M0039	0.0884578
Pi15	Etv4	0	M0039	0.0710316
Pi15	Cntn1	0	M0039	0.066077
Pi15	Cxcr6	0	M0039	0.128694
Pi15	Folh1	0	M0039	0.0480101
Pi15	1700015G11Rik	0	M0039	0.121379
Pi15	Cyp2s1	0	M0039	0.0380741
Pi15	Bai2	0	M0039	0.0548092
Pi15	Abcc6	0	M0039	0.0180823
Pi15	F3	0	M0039	0.116887
Pi15	Tnr	0	M0039	0.0525105
Pi15	Clic3	0	M0039	0.0305542
Pi15	Olfr1265	0	M0039	0.0156247
Pi15	Olfr1052	0	M0039	0.0332085
Pi15	Insrr	0	M0039	0.0703015
Pi15	Crybb3	0	M0039	0.0561452
Pi15	Adra2c	0	M0039	0.0597826
Pi15	Ibsp	0	M0039	0.0777188
Pi15	Ptprf	0	M0039	0.0518906
Pi15	Ttc12	0	M0039	0.0161617
Pi15	Itih3	0	M0039	0.0481924
Pi15	Cps1	0	M0039	0.0618031
Pi15	Podn	0	M0039	0.0405161
Pi15	Scn3b	0	M0039	0.063591
Pi15	Ass1	0	M0039	0.093371
Pi15	Il3ra	0	M0039	0.0542294
Pi15	Serpina1d	0	M0039	0.0265751
Pi15	Serpinb6b	0	M0039	0.0101497
Pi15	Gjb3	0	M0039	0.0349534
Pi15	Il17re	0	M0039	0.155232
Pi15	Enpp5	0	M0039	0.0928978
Pi15	Gyk	0	M0039	0.0144215
Pi15	Mbd2	0	M0039	0.0206314
Pi15	Slc22a18	0	M0039	0.148076
Pi15	Gzmk	0	M0039	0.0850416
Pi15	Efemp1	0	M0039	0.148595
Pi15	Fetub	0	M0039	0.171983
Pi15	Igfbp2	0	M0039	0.0514569
Pi15	Ank1	0	M0039	0.0164202
Pi15	Ngb	0	M0039	0.0933344
Pi15	Yars	0	M0039	0.0326135
Pi15	Prkar1b	0	M0039	0.185552
Pi15	Slc6a4	0	M0039	0.0515769
Pi15	A230065H16Rik	0	M0039	0.132834
Pi15	Cbs	0	M0039	0.182976
Pi15	Prnd	0	M0039	0.027959
Pi15	Capn9	0	M0039	0.0412203
Pi15	4930438A08Rik	0	M0039	0.0319747
Pi15	Olfr667	0	M0039	0.0111538
Pi15	Rgs7	0	M0039	0.0473455
Pi15	Myo3a	0	M0039	0.0279335
Pi15	Sf3a2	0	M0039	0.0715539
Pi15	Bglap2	0	M0039	0.0845724
Pi15	Ache	0	M0039	0.104182
Pi15	4632427E13Rik	0	M0039	0.0479282
Pi15	Fcer1a	0	M0039	0.116417
Pi15	9330182L06Rik	0	M0039	0.0651733
Pi15	Atp1b4	0	M0039	0.0378844
Pi15	Nfasc	0	M0039	0.119325
Pi15	Calb1	0	M0039	0.059155
Pi15	Mpp2	0	M0039	0.0654372
Pi15	Nrap	0	M0039	0.0240922
Pi15	Glipr2	0	M0039	0.0238672
Pi15	Tcrb-J	0	M0039	0.0760328
Pi15	Tgfbr3	0	M0039	0.172082
Pi15	Fez1	0	M0039	0.0959721
Pi15	Hao1	0	M0039	0.0780579
Pi15	Ccnd1	0	M0039	0.10052
Pi15	Cdh3	0	M0039	0.1802
Pi15	Kctd12	0	M0039	0.144188
Ptgs2	Retnla	0	M0039	0.0289139
Ptgs2	Rgs1	0	M0039	0.0664469
Ptgs2	Crym	0	M0039	0.0168976
Ptgs2	Acr	0	M0039	0.0377136
Ptgs2	Olfr575	0	M0039	0.0447598
Ptgs2	Plcb1	0	M0039	0.0581787
Ptgs2	Ier3	0	M0039	0.19888
Ptgs2	Arg1	0	M0039	0.0169456
Ptgs2	Atp8a2	0	M0039	0.0626579
Ptgs2	Nid2	0	M0039	0.0138941
[truncated: 10,721 more rows]
