# Supplementary material for: Co-expression network analysis identified hub genes critical to triglyceride and free fatty acid metabolism as key regulators of age-related vascular dysfunction in mice
Source: Aging (Albany NY). 2019 Sep 12;11(18):7620–38. doi: 10.18632/aging.102275 (PMC6781998; doi:10.18632/aging.102275)
Supplement: Supplementary Table 21 [file aging-11-102275-s018.xlsx]

## Sheet: Sheet1
Supplementary Table 21. Edge list of top 30 genes within the turquoise module that is read in VisANT.
Gdf10	Adcy1	0	M0039	0.266847
Gdf10	Fmod	0	M0039	0.324375
Gdf10	Hic1	0	M0039	0.212814
Gdf10	Myoc	0	M0039	0.29954
Gdf10	Rasa4	0	M0039	0.25947
Gdf10	Rarres1	0	M0039	0.257275
Gdf10	Ahsg	0	M0039	0.245653
Gdf10	Gpnmb	0	M0039	0.236288
Gdf10	Cacna2d3	0	M0039	0.288604
Gdf10	Igfbp4	0	M0039	0.2105
Gdf10	Kif1a	0	M0039	0.245946
Gdf10	Cpxm2	0	M0039	0.310733
Gdf10	Skiv2l	0	M0039	0.210519
Gdf10	Etv4	0	M0039	0.199399
Gdf10	F3	0	M0039	0.286087
Gdf10	Ibsp	0	M0039	0.249792
Gdf10	Itih3	0	M0039	0.233794
Gdf10	Ass1	0	M0039	0.221036
Gdf10	Enpp5	0	M0039	0.192841
Gdf10	Slc22a18	0	M0039	0.218072
Gdf10	Efemp1	0	M0039	0.281129
Gdf10	Ngb	0	M0039	0.191088
Gdf10	Prkar1b	0	M0039	0.322582
Gdf10	A230065H16Rik	0	M0039	0.318175
Gdf10	Fcer1a	0	M0039	0.188975
Gdf10	Nfasc	0	M0039	0.250859
Gdf10	Tcrb-J	0	M0039	0.157473
Gdf10	Fez1	0	M0039	0.214023
Gdf10	Kctd12	0	M0039	0.270978
Adcy1	Fmod	0	M0039	0.305237
Adcy1	Hic1	0	M0039	0.223692
Adcy1	Myoc	0	M0039	0.275646
Adcy1	Rasa4	0	M0039	0.248701
Adcy1	Rarres1	0	M0039	0.263212
Adcy1	Ahsg	0	M0039	0.259037
Adcy1	Gpnmb	0	M0039	0.225854
Adcy1	Cacna2d3	0	M0039	0.283064
Adcy1	Igfbp4	0	M0039	0.260191
Adcy1	Kif1a	0	M0039	0.280105
Adcy1	Cpxm2	0	M0039	0.294064
Adcy1	Skiv2l	0	M0039	0.238377
Adcy1	Etv4	0	M0039	0.238047
Adcy1	F3	0	M0039	0.249353
Adcy1	Ibsp	0	M0039	0.273825
Adcy1	Itih3	0	M0039	0.25145
Adcy1	Ass1	0	M0039	0.242923
Adcy1	Enpp5	0	M0039	0.173884
Adcy1	Slc22a18	0	M0039	0.24044
Adcy1	Efemp1	0	M0039	0.224512
Adcy1	Ngb	0	M0039	0.220355
Adcy1	Prkar1b	0	M0039	0.290507
Adcy1	A230065H16Rik	0	M0039	0.290547
Adcy1	Fcer1a	0	M0039	0.199324
Adcy1	Nfasc	0	M0039	0.265422
Adcy1	Tcrb-J	0	M0039	0.193832
Adcy1	Fez1	0	M0039	0.209753
Adcy1	Kctd12	0	M0039	0.270935
Fmod	Hic1	0	M0039	0.222919
Fmod	Myoc	0	M0039	0.314714
Fmod	Rasa4	0	M0039	0.261576
Fmod	Rarres1	0	M0039	0.293481
Fmod	Ahsg	0	M0039	0.248266
Fmod	Gpnmb	0	M0039	0.248911
Fmod	Cacna2d3	0	M0039	0.33277
Fmod	Igfbp4	0	M0039	0.216183
Fmod	Kif1a	0	M0039	0.278902
Fmod	Cpxm2	0	M0039	0.32766
Fmod	Skiv2l	0	M0039	0.231211
Fmod	Etv4	0	M0039	0.252624
Fmod	F3	0	M0039	0.317892
Fmod	Ibsp	0	M0039	0.285053
Fmod	Itih3	0	M0039	0.277968
Fmod	Ass1	0	M0039	0.269184
Fmod	Enpp5	0	M0039	0.203694
Fmod	Slc22a18	0	M0039	0.22349
Fmod	Efemp1	0	M0039	0.269512
Fmod	Ngb	0	M0039	0.246594
Fmod	Prkar1b	0	M0039	0.295474
Fmod	A230065H16Rik	0	M0039	0.325148
Fmod	Fcer1a	0	M0039	0.186954
Fmod	Nfasc	0	M0039	0.269813
Fmod	Tcrb-J	0	M0039	0.167044
Fmod	Fez1	0	M0039	0.260202
Fmod	Kctd12	0	M0039	0.292264
Hic1	Myoc	0	M0039	0.214095
Hic1	Rasa4	0	M0039	0.186566
Hic1	Rarres1	0	M0039	0.211658
Hic1	Ahsg	0	M0039	0.183598
Hic1	Gpnmb	0	M0039	0.191789
Hic1	Cacna2d3	0	M0039	0.219475
Hic1	Igfbp4	0	M0039	0.1988
Hic1	Kif1a	0	M0039	0.191096
Hic1	Cpxm2	0	M0039	0.215446
Hic1	Skiv2l	0	M0039	0.211417
Hic1	Etv4	0	M0039	0.191995
Hic1	F3	0	M0039	0.209728
Hic1	Ibsp	0	M0039	0.186478
Hic1	Itih3	0	M0039	0.183713
Hic1	Ass1	0	M0039	0.205516
Hic1	Enpp5	0	M0039	0.15572
Hic1	Slc22a18	0	M0039	0.170251
Hic1	Efemp1	0	M0039	0.176884
Hic1	Ngb	0	M0039	0.175999
Hic1	Prkar1b	0	M0039	0.21296
Hic1	A230065H16Rik	0	M0039	0.226931
Hic1	Fcer1a	0	M0039	0.196875
Hic1	Nfasc	0	M0039	0.191011
Hic1	Tcrb-J	0	M0039	0.161266
Hic1	Fez1	0	M0039	0.20045
Hic1	Kctd12	0	M0039	0.196453
Myoc	Rasa4	0	M0039	0.265922
Myoc	Rarres1	0	M0039	0.269297
Myoc	Ahsg	0	M0039	0.231735
Myoc	Gpnmb	0	M0039	0.249502
Myoc	Cacna2d3	0	M0039	0.317245
Myoc	Igfbp4	0	M0039	0.19777
Myoc	Kif1a	0	M0039	0.279529
Myoc	Cpxm2	0	M0039	0.305176
Myoc	Skiv2l	0	M0039	0.201379
Myoc	Etv4	0	M0039	0.257654
Myoc	F3	0	M0039	0.306122
Myoc	Ibsp	0	M0039	0.281567
Myoc	Itih3	0	M0039	0.300824
Myoc	Ass1	0	M0039	0.251396
Myoc	Enpp5	0	M0039	0.214522
Myoc	Slc22a18	0	M0039	0.20534
Myoc	Efemp1	0	M0039	0.248938
Myoc	Ngb	0	M0039	0.234908
Myoc	Prkar1b	0	M0039	0.24517
Myoc	A230065H16Rik	0	M0039	0.295058
Myoc	Fcer1a	0	M0039	0.184935
Myoc	Nfasc	0	M0039	0.270589
Myoc	Tcrb-J	0	M0039	0.180977
Myoc	Fez1	0	M0039	0.270431
Myoc	Kctd12	0	M0039	0.237974
Rasa4	Rarres1	0	M0039	0.21914
Rasa4	Ahsg	0	M0039	0.207624
Rasa4	Gpnmb	0	M0039	0.250556
Rasa4	Cacna2d3	0	M0039	0.293063
Rasa4	Igfbp4	0	M0039	0.215292
Rasa4	Kif1a	0	M0039	0.283735
Rasa4	Cpxm2	0	M0039	0.284395
Rasa4	Skiv2l	0	M0039	0.174877
Rasa4	Etv4	0	M0039	0.274481
Rasa4	F3	0	M0039	0.261778
Rasa4	Ibsp	0	M0039	0.291743
Rasa4	Itih3	0	M0039	0.327836
Rasa4	Ass1	0	M0039	0.213032
Rasa4	Enpp5	0	M0039	0.180293
Rasa4	Slc22a18	0	M0039	0.191009
Rasa4	Efemp1	0	M0039	0.217763
Rasa4	Ngb	0	M0039	0.200385
Rasa4	Prkar1b	0	M0039	0.24223
Rasa4	A230065H16Rik	0	M0039	0.25029
Rasa4	Fcer1a	0	M0039	0.174329
Rasa4	Nfasc	0	M0039	0.278188
Rasa4	Tcrb-J	0	M0039	0.181098
Rasa4	Fez1	0	M0039	0.21969
Rasa4	Kctd12	0	M0039	0.215541
Rarres1	Ahsg	0	M0039	0.255273
Rarres1	Gpnmb	0	M0039	0.199471
Rarres1	Cacna2d3	0	M0039	0.251057
Rarres1	Igfbp4	0	M0039	0.224639
Rarres1	Kif1a	0	M0039	0.23726
Rarres1	Cpxm2	0	M0039	0.274859
Rarres1	Skiv2l	0	M0039	0.252082
Rarres1	Etv4	0	M0039	0.185013
Rarres1	F3	0	M0039	0.240469
Rarres1	Ibsp	0	M0039	0.246858
Rarres1	Itih3	0	M0039	0.198014
Rarres1	Ass1	0	M0039	0.188241
Rarres1	Enpp5	0	M0039	0.204815
Rarres1	Slc22a18	0	M0039	0.204728
Rarres1	Efemp1	0	M0039	0.209301
Rarres1	Ngb	0	M0039	0.182564
Rarres1	Prkar1b	0	M0039	0.265054
Rarres1	A230065H16Rik	0	M0039	0.275394
Rarres1	Fcer1a	0	M0039	0.210351
Rarres1	Nfasc	0	M0039	0.210686
Rarres1	Tcrb-J	0	M0039	0.198381
Rarres1	Fez1	0	M0039	0.201759
Rarres1	Kctd12	0	M0039	0.254266
Ahsg	Gpnmb	0	M0039	0.184756
Ahsg	Cacna2d3	0	M0039	0.23695
Ahsg	Igfbp4	0	M0039	0.228841
Ahsg	Kif1a	0	M0039	0.217465
Ahsg	Cpxm2	0	M0039	0.269816
Ahsg	Skiv2l	0	M0039	0.218554
Ahsg	Etv4	0	M0039	0.191284
Ahsg	F3	0	M0039	0.204342
Ahsg	Ibsp	0	M0039	0.238089
Ahsg	Itih3	0	M0039	0.205097
Ahsg	Ass1	0	M0039	0.193643
Ahsg	Enpp5	0	M0039	0.180233
Ahsg	Slc22a18	0	M0039	0.213407
Ahsg	Efemp1	0	M0039	0.205169
Ahsg	Ngb	0	M0039	0.16597
Ahsg	Prkar1b	0	M0039	0.267241
Ahsg	A230065H16Rik	0	M0039	0.247427
Ahsg	Fcer1a	0	M0039	0.192136
Ahsg	Nfasc	0	M0039	0.204996
Ahsg	Tcrb-J	0	M0039	0.184285
Ahsg	Fez1	0	M0039	0.165229
Ahsg	Kctd12	0	M0039	0.234405
Gpnmb	Cacna2d3	0	M0039	0.268902
Gpnmb	Igfbp4	0	M0039	0.224402
Gpnmb	Kif1a	0	M0039	0.21762
Gpnmb	Cpxm2	0	M0039	0.242203
Gpnmb	Skiv2l	0	M0039	0.187413
Gpnmb	Etv4	0	M0039	0.234308
Gpnmb	F3	0	M0039	0.224002
Gpnmb	Ibsp	0	M0039	0.235043
Gpnmb	Itih3	0	M0039	0.232184
Gpnmb	Ass1	0	M0039	0.199567
Gpnmb	Enpp5	0	M0039	0.155342
Gpnmb	Slc22a18	0	M0039	0.16961
Gpnmb	Efemp1	0	M0039	0.218649
Gpnmb	Ngb	0	M0039	0.185081
Gpnmb	Prkar1b	0	M0039	0.244261
Gpnmb	A230065H16Rik	0	M0039	0.235065
Gpnmb	Fcer1a	0	M0039	0.152673
Gpnmb	Nfasc	0	M0039	0.229868
Gpnmb	Tcrb-J	0	M0039	0.169173
Gpnmb	Fez1	0	M0039	0.18516
Gpnmb	Kctd12	0	M0039	0.219332
Cacna2d3	Igfbp4	0	M0039	0.2514
Cacna2d3	Kif1a	0	M0039	0.294207
Cacna2d3	Cpxm2	0	M0039	0.304519
Cacna2d3	Skiv2l	0	M0039	0.217293
Cacna2d3	Etv4	0	M0039	0.257857
Cacna2d3	F3	0	M0039	0.281799
Cacna2d3	Ibsp	0	M0039	0.290565
Cacna2d3	Itih3	0	M0039	0.284346
Cacna2d3	Ass1	0	M0039	0.238273
Cacna2d3	Enpp5	0	M0039	0.18212
Cacna2d3	Slc22a18	0	M0039	0.216971
Cacna2d3	Efemp1	0	M0039	0.254076
Cacna2d3	Ngb	0	M0039	0.222707
Cacna2d3	Prkar1b	0	M0039	0.297367
Cacna2d3	A230065H16Rik	0	M0039	0.306576
Cacna2d3	Fcer1a	0	M0039	0.175112
Cacna2d3	Nfasc	0	M0039	0.289109
Cacna2d3	Tcrb-J	0	M0039	0.186982
Cacna2d3	Fez1	0	M0039	0.227537
Cacna2d3	Kctd12	0	M0039	0.273497
Igfbp4	Kif1a	0	M0039	0.23224
Igfbp4	Cpxm2	0	M0039	0.241433
Igfbp4	Skiv2l	0	M0039	0.18847
Igfbp4	Etv4	0	M0039	0.256054
Igfbp4	F3	0	M0039	0.190661
Igfbp4	Ibsp	0	M0039	0.249769
Igfbp4	Itih3	0	M0039	0.237218
Igfbp4	Ass1	0	M0039	0.221105
Igfbp4	Enpp5	0	M0039	0.157577
Igfbp4	Slc22a18	0	M0039	0.200971
Igfbp4	Efemp1	0	M0039	0.180738
Igfbp4	Ngb	0	M0039	0.20012
Igfbp4	Prkar1b	0	M0039	0.211719
Igfbp4	A230065H16Rik	0	M0039	0.216801
Igfbp4	Fcer1a	0	M0039	0.194015
Igfbp4	Nfasc	0	M0039	0.22689
Igfbp4	Tcrb-J	0	M0039	0.224193
Igfbp4	Fez1	0	M0039	0.181154
Igfbp4	Kctd12	0	M0039	0.191127
Kif1a	Cpxm2	0	M0039	0.286498
Kif1a	Skiv2l	0	M0039	0.201335
Kif1a	Etv4	0	M0039	0.291668
Kif1a	F3	0	M0039	0.263431
Kif1a	Ibsp	0	M0039	0.303295
Kif1a	Itih3	0	M0039	0.341702
Kif1a	Ass1	0	M0039	0.244079
Kif1a	Enpp5	0	M0039	0.18341
Kif1a	Slc22a18	0	M0039	0.234046
Kif1a	Efemp1	0	M0039	0.206883
Kif1a	Ngb	0	M0039	0.235438
Kif1a	Prkar1b	0	M0039	0.256911
Kif1a	A230065H16Rik	0	M0039	0.251322
Kif1a	Fcer1a	0	M0039	0.160394
Kif1a	Nfasc	0	M0039	0.298106
Kif1a	Tcrb-J	0	M0039	0.165782
Kif1a	Fez1	0	M0039	0.229459
Kif1a	Kctd12	0	M0039	0.261627
Cpxm2	Skiv2l	0	M0039	0.218084
Cpxm2	Etv4	0	M0039	0.235815
Cpxm2	F3	0	M0039	0.280845
Cpxm2	Ibsp	0	M0039	0.293459
Cpxm2	Itih3	0	M0039	0.280901
Cpxm2	Ass1	0	M0039	0.227302
Cpxm2	Enpp5	0	M0039	0.195203
Cpxm2	Slc22a18	0	M0039	0.229663
Cpxm2	Efemp1	0	M0039	0.257728
Cpxm2	Ngb	0	M0039	0.198467
Cpxm2	Prkar1b	0	M0039	0.322978
Cpxm2	A230065H16Rik	0	M0039	0.316547
Cpxm2	Fcer1a	0	M0039	0.207338
Cpxm2	Nfasc	0	M0039	0.274934
Cpxm2	Tcrb-J	0	M0039	0.187276
Cpxm2	Fez1	0	M0039	0.214788
Cpxm2	Kctd12	0	M0039	0.270219
Skiv2l	Etv4	0	M0039	0.193085
Skiv2l	F3	0	M0039	0.21402
Skiv2l	Ibsp	0	M0039	0.202606
Skiv2l	Itih3	0	M0039	0.177412
Skiv2l	Ass1	0	M0039	0.211173
Skiv2l	Enpp5	0	M0039	0.195346
Skiv2l	Slc22a18	0	M0039	0.198594
Skiv2l	Efemp1	0	M0039	0.187548
Skiv2l	Ngb	0	M0039	0.200869
Skiv2l	Prkar1b	0	M0039	0.200143
Skiv2l	A230065H16Rik	0	M0039	0.222258
Skiv2l	Fcer1a	0	M0039	0.21202
Skiv2l	Nfasc	0	M0039	0.181271
Skiv2l	Tcrb-J	0	M0039	0.205831
Skiv2l	Fez1	0	M0039	0.212501
Skiv2l	Kctd12	0	M0039	0.215876
Etv4	F3	0	M0039	0.219406
Etv4	Ibsp	0	M0039	0.273739
Etv4	Itih3	0	M0039	0.272912
Etv4	Ass1	0	M0039	0.193334
Etv4	Enpp5	0	M0039	0.16128
Etv4	Slc22a18	0	M0039	0.202602
Etv4	Efemp1	0	M0039	0.181272
Etv4	Ngb	0	M0039	0.209113
Etv4	Prkar1b	0	M0039	0.230504
Etv4	A230065H16Rik	0	M0039	0.22622
Etv4	Fcer1a	0	M0039	0.14415
Etv4	Nfasc	0	M0039	0.282141
Etv4	Tcrb-J	0	M0039	0.184258
Etv4	Fez1	0	M0039	0.195076
Etv4	Kctd12	0	M0039	0.22927
F3	Ibsp	0	M0039	0.246529
F3	Itih3	0	M0039	0.255638
F3	Ass1	0	M0039	0.23149
F3	Enpp5	0	M0039	0.209526
F3	Slc22a18	0	M0039	0.219497
F3	Efemp1	0	M0039	0.260382
F3	Ngb	0	M0039	0.221583
F3	Prkar1b	0	M0039	0.282964
F3	A230065H16Rik	0	M0039	0.291288
F3	Fcer1a	0	M0039	0.158599
F3	Nfasc	0	M0039	0.263674
F3	Tcrb-J	0	M0039	0.136747
F3	Fez1	0	M0039	0.254086
F3	Kctd12	0	M0039	0.283854
Ibsp	Itih3	0	M0039	0.317085
Ibsp	Ass1	0	M0039	0.210895
Ibsp	Enpp5	0	M0039	0.189245
Ibsp	Slc22a18	0	M0039	0.219678
Ibsp	Efemp1	0	M0039	0.213966
Ibsp	Ngb	0	M0039	0.199929
Ibsp	Prkar1b	0	M0039	0.273334
Ibsp	A230065H16Rik	0	M0039	0.262783
Ibsp	Fcer1a	0	M0039	0.171751
Ibsp	Nfasc	0	M0039	0.284146
Ibsp	Tcrb-J	0	M0039	0.193684
Ibsp	Fez1	0	M0039	0.19634
Ibsp	Kctd12	0	M0039	0.251889
Itih3	Ass1	0	M0039	0.193581
Itih3	Enpp5	0	M0039	0.181056
Itih3	Slc22a18	0	M0039	0.202891
Itih3	Efemp1	0	M0039	0.191083
Itih3	Ngb	0	M0039	0.198666
Itih3	Prkar1b	0	M0039	0.249693
Itih3	A230065H16Rik	0	M0039	0.24543
Itih3	Fcer1a	0	M0039	0.158637
Itih3	Nfasc	0	M0039	0.314437
Itih3	Tcrb-J	0	M0039	0.178336
Itih3	Fez1	0	M0039	0.218437
Itih3	Kctd12	0	M0039	0.229436
Ass1	Enpp5	0	M0039	0.146147
Ass1	Slc22a18	0	M0039	0.229431
Ass1	Efemp1	0	M0039	0.213627
Ass1	Ngb	0	M0039	0.23912
Ass1	Prkar1b	0	M0039	0.245879
Ass1	A230065H16Rik	0	M0039	0.251832
Ass1	Fcer1a	0	M0039	0.145329
Ass1	Nfasc	0	M0039	0.251705
Ass1	Tcrb-J	0	M0039	0.141274
Ass1	Fez1	0	M0039	0.210237
Ass1	Kctd12	0	M0039	0.260761
Enpp5	Slc22a18	0	M0039	0.157396
Enpp5	Efemp1	0	M0039	0.167755
Enpp5	Ngb	0	M0039	0.15256
Enpp5	Prkar1b	0	M0039	0.184856
Enpp5	A230065H16Rik	0	M0039	0.192527
Enpp5	Fcer1a	0	M0039	0.155578
Enpp5	Nfasc	0	M0039	0.165983
Enpp5	Tcrb-J	0	M0039	0.149372
Enpp5	Fez1	0	M0039	0.191593
Enpp5	Kctd12	0	M0039	0.196927
Slc22a18	Efemp1	0	M0039	0.206213
Slc22a18	Ngb	0	M0039	0.226403
Slc22a18	Prkar1b	0	M0039	0.242238
Slc22a18	A230065H16Rik	0	M0039	0.226351
Slc22a18	Fcer1a	0	M0039	0.148181
Slc22a18	Nfasc	0	M0039	0.234956
Slc22a18	Tcrb-J	0	M0039	0.134698
Slc22a18	Fez1	0	M0039	0.191126
Slc22a18	Kctd12	0	M0039	0.253471
Efemp1	Ngb	0	M0039	0.203916
Efemp1	Prkar1b	0	M0039	0.279335
Efemp1	A230065H16Rik	0	M0039	0.270496
Efemp1	Fcer1a	0	M0039	0.143214
Efemp1	Nfasc	0	M0039	0.223788
Efemp1	Tcrb-J	0	M0039	0.124515
Efemp1	Fez1	0	M0039	0.196522
Efemp1	Kctd12	0	M0039	0.261363
Ngb	Prkar1b	0	M0039	0.21621
Ngb	A230065H16Rik	0	M0039	0.221121
Ngb	Fcer1a	0	M0039	0.109365
Ngb	Nfasc	0	M0039	0.244674
Ngb	Tcrb-J	0	M0039	0.123446
Ngb	Fez1	0	M0039	0.202303
Ngb	Kctd12	0	M0039	0.264906
Prkar1b	A230065H16Rik	0	M0039	0.30899
Prkar1b	Fcer1a	0	M0039	0.209603
Prkar1b	Nfasc	0	M0039	0.263539
Prkar1b	Tcrb-J	0	M0039	0.173641
Prkar1b	Fez1	0	M0039	0.218139
Prkar1b	Kctd12	0	M0039	0.251234
A230065H16Rik	Fcer1a	0	M0039	0.192419
A230065H16Rik	Nfasc	0	M0039	0.256708
A230065H16Rik	Tcrb-J	0	M0039	0.155857
A230065H16Rik	Fez1	0	M0039	0.229467
A230065H16Rik	Kctd12	0	M0039	0.279996
Fcer1a	Nfasc	0	M0039	0.145437
Fcer1a	Tcrb-J	0	M0039	0.180546
Fcer1a	Fez1	0	M0039	0.141052
Fcer1a	Kctd12	0	M0039	0.164167
Nfasc	Tcrb-J	0	M0039	0.146241
Nfasc	Fez1	0	M0039	0.223304
Nfasc	Kctd12	0	M0039	0.258306
Tcrb-J	Fez1	0	M0039	0.134648
Tcrb-J	Kctd12	0	M0039	0.159221
Fez1	Kctd12	0	M0039	0.241588
